# Supplementary material for: Molecular Characterization and Phylogenetic Analysis of Casein Gene Family in Camelus ferus
Source: MDPI journal article supplement (doi:10.3390/genes14020256), 2023-01-18
Supplement: s1 [file s1]

**Table S1.** Accession Number of Selected Species for Phylogenetic analysis.

| Species Name               | CNS1N1         | CNS2N1         | CSN2           | CSN3           |
|----------------------------|----------------|----------------|----------------|----------------|
| <i>Sus scrofa</i>          | NP_001004029.1 | XP_020956156.1 | NP_999599.1    | NP_001004026.1 |
| <i>Bubalus bubalis</i>     | XP_006071188.1 | XP_044801432.1 | XP_044801438.1 | NP_001277901.1 |
| <i>Bos taurus</i>          | XP_005208086.1 | NP_776953.1    | XP_010804480.2 | NP_776719.1    |
| <i>Camelus ferus</i>       | XP_006188730.1 | XP_006188732.1 | XP_032314521.1 | XP_006188734.1 |
| <i>Camelus dromedarius</i> | NP_001290495.1 | NP_001290490.1 | NP_001290492.1 | NP_001290489.1 |
| <i>Capra hircus</i>        | XP_017904619.1 | NP_001272514.1 | XP_013820153.1 | NP_001272516.1 |
| <i>Ovis aries</i>          | XP_012034747.1 | NP_001009363.1 | NP_001009373.1 | NP_001009378.1 |

**Table S2.** Promoter region in CNS family.

| CSN1S1_Camelus ferus        | Position | Score | Likelihood               |
|-----------------------------|----------|-------|--------------------------|
|                             | 6900     | 1.163 | Highly likely prediction |
|                             | 8300     | 1.209 | Highly likely prediction |
|                             | 10600    | 0.717 | Marginal prediction      |
|                             | 12000    | 0.687 | Marginal prediction      |
|                             | 13800    | 1.114 | Highly likely prediction |
|                             | 16000    | 1.081 | Highly likely prediction |
| <b>CSN1S2_Camelus ferus</b> |          |       |                          |
|                             | 2700     | 1.191 | Highly likely prediction |
|                             | 5400     | 0.737 | Marginal prediction      |
|                             | 6700     | 0.701 | Marginal prediction      |
|                             | 9800     | 1.132 | Highly likely prediction |
|                             | 12400    | 0.705 | Marginal prediction      |
|                             | 13100    | 1.101 | Highly likely prediction |
| <b>CSN2_Camelus ferus</b>   |          |       |                          |
|                             | 500      | 0.703 | Marginal prediction      |
|                             | 2300     | 1.223 | Highly likely prediction |
|                             | 4600     | 1.144 | Highly likely prediction |
|                             | 6800     | 0.675 | Marginal prediction      |
|                             | 7900     | 0.589 | Marginal prediction      |
| <b>CSN3_Camelus ferus</b>   |          |       |                          |
|                             | 3600     | 1.143 | Highly likely prediction |

**Table S3.** Nuclear hormone receptor sites patterns in the casein gene family of *Camelus ferus*.

| Site type                   | Sequence           | Start | End   | log (Viterbi probability) | log (Forward probaility) | log (Back-ground state probability) | Forward-Background |
|-----------------------------|--------------------|-------|-------|---------------------------|--------------------------|-------------------------------------|--------------------|
| <b>CSN1S1_Camelus ferus</b> |                    |       |       |                           |                          |                                     |                    |
| DR2                         | TGAACCTAATGCACT    | 5969  | 5982  | -20.439                   | -20.1527                 | -22.3315                            | 2.1788             |
| DR1                         | TGAACCTCTGAAAT     | 6129  | 6141  | -20.0489                  | -19.2623                 | -20.9351                            | 1.6728             |
| DR1                         | AGGTCAAAAGTAA      | 6608  | 6620  | -20.7279                  | -19.7657                 | -20.9351                            | 1.1694             |
| DR4                         | AGTTCAAGTGAGGTAA   | 8025  | 8040  | -22.8772                  | -22.7222                 | -25.1242                            | 2.402              |
| DR2                         | AGGTCATGAGGTCC     | 8486  | 8499  | -20.2558                  | -20.0864                 | -22.3315                            | 2.2451             |
| DR1                         | TGACTATTGACCT      | 14219 | 14231 | -20.5707                  | -19.2199                 | -20.9351                            | 1.7152             |
| ER6                         | TTAAATTAATGGGTTCA  | 1028  | 1045  | -27.2404                  | -26.2097                 | -27.9168                            | 1.7071             |
| ER6                         | TTAACTCAAAGTAGTTCA | 2821  | 2838  | -23.7463                  | -23.242                  | -27.9168                            | 4.6748             |

|                      |                      |       |       |          |          |          |        |
|----------------------|----------------------|-------|-------|----------|----------|----------|--------|
| ER1                  | TGAACTCAAGGCA        | 5121  | 5133  | -20.8658 | -19.6403 | -20.9351 | 1.2948 |
| ER8                  | TGAACTGAGCTTCTGGTCAA | 12890 | 12909 | -30.2121 | -29.4007 | -30.7095 | 1.3088 |
| ER8                  | TTAACTGTGCATTCAGCTCA | 13180 | 13199 | -28.4771 | -28.1717 | -30.7095 | 2.5378 |
| ER6                  | TGAGCTCCAAAGAGTACA   | 13476 | 13493 | -24.7639 | -24.6383 | -27.9168 | 3.2785 |
| ER4                  | TGACCTTTTAAGTTTA     | 15034 | 15049 | -23.6185 | -23.109  | -25.1242 | 2.0152 |
| CSN1S2_Camelus ferus |                      |       |       |          |          |          |        |
| DR4                  | TGTCCTAAGTTGAGCT     | 247   | 262   | -24.222  | -23.47   | -25.124  | 1.6544 |
| DR1                  | AGTTCAGAAGTCA        | 1788  | 1800  | -18.978  | -18.784  | -20.935  | 2.151  |
| DR0                  | GGTCAAAGTCA          | 9418  | 9429  | -19.169  | -18.353  | -19.539  | 1.1858 |
| IR1                  | GGGTCAATAACCC        | 578   | 590   | -20.684  | -20.024  | -20.935  | 0.9109 |
| IR1                  | GAGCCAATGGCCT        | 4825  | 4837  | -20.884  | -20.109  | -20.935  | 0.826  |
| IR1                  | GGGCCACAGTACT        | 14708 | 14720 | -19.644  | -19.393  | -20.935  | 1.5422 |
| ER6                  | TGAAATATAATAAGTTAA   | 2154  | 2171  | -25.284  | -24.929  | -27.917  | 2.9879 |
| ER8                  | TTAACTTGTTGTGTAATTCA | 2197  | 2216  | -29.699  | -28.931  | -30.71   | 1.7785 |
| ER6                  | TTAACTTCCTTTATTTAA   | 2373  | 2390  | -27.255  | -26.384  | -27.917  | 1.533  |
| ER8                  | TGAAGTCCCCACAGAGGTAA | 5197  | 5216  | -30.461  | -29.643  | -30.71   | 1.0667 |
| ER6                  | TGAAATATGTGTAGTTTA   | 7925  | 7942  | -26.637  | -25.994  | -27.917  | 1.9232 |
| ER8                  | AGACCTTATCAAAAAGTTAA | 8005  | 8024  | -29.291  | -28.86   | -30.71   | 1.8494 |
| ER8                  | TGAAGTTCCCACAGAGGTAA | 8293  | 8312  | -30.371  | -29.537  | -30.71   | 1.1727 |
| ER8                  | TGAACTATCTACATAGTCAA | 9446  | 9465  | -28.734  | -28.325  | -30.71   | 2.385  |
| ER6                  | TTACTTCCAGAAGGTAA    | 10825 | 10842 | -26.677  | -26.279  | -27.917  | 1.6375 |
| ER8                  | AGAACTGACAATTCAGTACA | 11861 | 11880 | -29.604  | -29.068  | -30.71   | 1.6418 |
| CSN2_Camelus ferus   |                      |       |       |          |          |          |        |
| DR1                  | TGACCTTTAACCA        | 3762  | 3774  | -18.9937 | -18.5865 | -20.9351 | 2.3486 |
| ER8                  | TGAACTATGGTATAAGTTAA | 1688  | 1707  | -27.0496 | -26.5408 | -30.7095 | 4.1687 |
| ER6                  | TGACCTAGGAACAGAAAA   | 1780  | 1797  | -27.2834 | -26.3376 | -27.9168 | 1.5792 |
| ER6                  | TTAAATTATCTTAGTTAA   | 1830  | 1847  | -27.2404 | -26.1623 | -27.9168 | 1.7545 |
| ER1                  | TGACCTTGGTCAA        | 2897  | 2909  | -20.6327 | -19.5318 | -20.9351 | 1.4033 |
| ER8                  | TGAACTCTACGTTAACCTCA | 4329  | 4348  | -29.4232 | -28.8108 | -30.7095 | 1.8987 |
| ER6                  | TTAACTACAATAAGTGAA   | 6531  | 6548  | -27.2404 | -26.3565 | -27.9168 | 1.5603 |
| ER6                  | TGTCCCTTTCTCAGTTCA   | 7028  | 7045  | -26.2495 | -25.7218 | -27.9168 | 2.195  |
| CSN3_Camelus ferus   |                      |       |       |          |          |          |        |
| DR1                  | AGTTGAGAGGCCA        | 215   | 227   | -20.4947 | -19.8153 | -20.9351 | 1.1198 |
| DR1                  | TGACCCCTTAACCT       | 600   | 612   | -20.7052 | -19.9071 | -20.9351 | 1.028  |
| DR3                  | TTAACTCTGTGACCC      | 1298  | 1312  | -22.4135 | -21.9795 | -23.7278 | 1.7483 |
| DR4                  | TGAACGACTATGACAT     | 3802  | 3817  | -24.735  | -23.9925 | -25.1242 | 1.1317 |
| DR2                  | TGACTGCCTGACCT       | 3938  | 3951  | -22.0781 | -20.8256 | -22.3315 | 1.5059 |
| DR4                  | TTCCCTTGTGTGACCT     | 8455  | 8470  | -23.7854 | -23.0836 | -25.1242 | 2.0406 |
| DR4                  | AGTTCATATATGTCA      | 9231  | 9246  | -24.4762 | -23.9021 | -25.1242 | 1.2221 |
| IR1                  | GGTTCACAGGCTT        | 5604  | 5616  | -20.6559 | -20.0319 | -20.9351 | 0.9032 |
| ER6                  | TAAACTGACTGTATTTCA   | 4282  | 4299  | -26.726  | -26.0827 | -27.9168 | 1.8341 |
| ER6                  | TTAACCTAGAAAACCTTCA  | 5324  | 5341  | -27.366  | -26.6181 | -27.9168 | 1.2987 |
| ER4                  | TTAACTGTAGAGTTCA     | 5547  | 5562  | -22.8528 | -22.2538 | -25.1242 | 2.8704 |

**Table S4.** Transcription binding site (GATA, TATA, STAT, and OCT1) and repressor site (YY1) in the genomic sequences of *Camelus ferus*, *Bos tarus*, *Ovis aries* casein gene family.

| CSN1S1_Camelus ferus |    |       |           |        |           |           |  |
|----------------------|----|-------|-----------|--------|-----------|-----------|--|
| AC                   | ID | SCORE | LOCA-TION | STRAND | CONSENSUS | SEQUENCES |  |
| M0007                |    |       |           | S      |           |           |  |

|       |             |          |     |     |                |                |
|-------|-------------|----------|-----|-----|----------------|----------------|
| 5     | V\$GATA1_01 | 0.827246 | 3   | (-) | SNNGATNNNN     | GATCATCAAC     |
| M0007 |             |          |     |     |                |                |
| 6     | V\$GATA2_01 | 0.797925 | 59  | (-) | NNNGATRNNN     | ACATATGGCA     |
| M0007 |             |          |     |     |                |                |
| 5     | V\$GATA1_01 | 0.821816 | 73  | (+) | SNNGATNNNN     | TATGATGATT     |
| M0007 |             |          |     |     |                |                |
| 6     | V\$GATA2_01 | 0.839874 | 73  | (+) | NNNGATRNNN     | TATGATGATT     |
| M0007 |             |          |     |     |                |                |
| 5     | V\$GATA1_01 | 0.837117 | 76  | (+) | SNNGATNNNN     | GATGATTCA      |
| M0007 |             |          |     |     |                |                |
| 6     | V\$GATA2_01 | 0.822282 | 76  | (+) | NNNGATRNNN     | GATGATTCA      |
| M0012 |             |          |     |     |                |                |
| 7     | V\$GATA1_03 | 0.812837 | 112 | (-) | RNSNNGATAANNGN | TCATTTATATGCAT |
| M0012 |             |          |     |     |                |                |
| 6     | V\$GATA1_02 | 0.784062 | 140 | (+) | NNNNNGATANKGNN | ATATTGATAACTTG |
| M0012 |             |          |     |     |                |                |
| 7     | V\$GATA1_03 | 0.869917 | 140 | (+) | RNSNNGATAANNGN | ATATTGATAACTTG |
| M0012 |             |          |     |     |                |                |
| 8     | V\$GATA1_04 | 0.817096 | 141 | (+) | NNCWGATARNNNN  | TATTGATAACTTG  |
| M0007 |             |          |     |     |                |                |
| 5     | V\$GATA1_01 | 0.777394 | 142 | (+) | SNNGATNNNN     | ATTGATAACT     |
| M0012 |             |          |     |     |                |                |
| 6     | V\$GATA1_02 | 0.8225   | 183 | (+) | NNNNNGATANKGNN | ATGTTGATACTATC |
| M0012 |             |          |     |     |                |                |
| 7     | V\$GATA1_03 | 0.856688 | 183 | (+) | RNSNNGATAANNGN | ATGTTGATACTATC |
| M0007 |             |          |     |     |                |                |
| 5     | V\$GATA1_01 | 0.846002 | 185 | (+) | SNNGATNNNN     | GTTGATACTA     |
| M0007 |             |          |     |     |                |                |
| 6     | V\$GATA2_01 | 0.797474 | 185 | (+) | NNNGATRNNN     | GTTGATACTA     |
| M0012 |             |          |     |     |                |                |
| 6     | V\$GATA1_02 | 0.844375 | 188 | (-) | NNNNNGATANKGNN | GATACTATCTATCT |
| M0012 |             |          |     |     |                |                |
| 7     | V\$GATA1_03 | 0.868447 | 188 | (-) | RNSNNGATAANNGN | GATACTATCTATCT |
| M0007 |             |          |     |     |                |                |
| 5     | V\$GATA1_01 | 0.786278 | 190 | (-) | SNNGATNNNN     | TACTATCTAT     |
| M0007 |             |          |     |     |                |                |
| 6     | V\$GATA2_01 | 0.7871   | 190 | (-) | NNNGATRNNN     | TACTATCTAT     |
| M0007 |             |          |     |     |                |                |
| 7     | V\$GATA3_01 | 0.902525 | 190 | (-) | NNGATARNG      | TACTATCTA      |
| M0020 |             |          |     |     |                |                |
| 3     | V\$GATA_C   | 0.853992 | 191 | (-) | NGATAAGNMNN    | ACTATCTATCT    |
| M0012 |             |          |     |     |                |                |
| 6     | V\$GATA1_02 | 0.8125   | 192 | (-) | NNNNNGATANKGNN | CTATCTATCTTTAG |
| M0012 |             |          |     |     |                |                |
| 7     | V\$GATA1_03 | 0.83268  | 192 | (-) | RNSNNGATAANNGN | CTATCTATCTTTAG |
| M0012 |             |          |     |     |                |                |
| 8     | V\$GATA1_04 | 0.893382 | 192 | (-) | NNCWGATARNNNN  | CTATCTATCTTTA  |
| M0007 |             |          |     |     |                |                |
| 5     | V\$GATA1_01 | 0.818361 | 194 | (-) | SNNGATNNNN     | ATCTATCTTT     |
| M0007 |             |          |     |     |                |                |
| 6     | V\$GATA2_01 | 0.858367 | 194 | (-) | NNNGATRNNN     | ATCTATCTTT     |
| M0007 |             |          |     |     |                |                |
| 7     | V\$GATA3_01 | 0.875055 | 194 | (-) | NNGATARNG      | ATCTATCTT      |
| M0007 |             |          |     |     |                |                |
| 5     | V\$GATA1_01 | 0.816387 | 215 | (-) | SNNGATNNNN     | AAAAATCATA     |
| M0007 |             |          |     |     |                |                |
| 6     | V\$GATA2_01 | 0.818674 | 215 | (-) | NNNGATRNNN     | AAAAATCATA     |
| M0007 |             |          |     |     |                |                |
| 5     | V\$GATA1_01 | 0.804047 | 234 | (-) | SNNGATNNNN     | AAACATCAAA     |
| M0007 |             |          |     |     |                |                |
| 5     | V\$GATA1_01 | 0.785785 | 250 | (+) | SNNGATNNNN     | TTTGATGACT     |
| M0012 |             |          |     |     |                |                |
| 7     | V\$GATA1_03 | 0.824841 | 286 | (+) | RNSNNGATAANNGN | AAGTAGATACATAA |
| M0007 |             |          |     |     |                |                |
| 5     | V\$GATA1_01 | 0.821323 | 288 | (+) | SNNGATNNNN     | GTAGATACAT     |

|       |             |          |     |     |                |                |
|-------|-------------|----------|-----|-----|----------------|----------------|
| M0007 |             |          |     |     |                |                |
| 6     | V\$GATA2_01 | 0.798376 | 288 | (+) | NNNGATRNNN     | GTAGATACAT     |
| M0020 |             |          |     |     |                |                |
| 3     | V\$GATA_C   | 0.888785 | 290 | (+) | NGATAAGNMNN    | AGATACATAAT    |
| M0020 |             |          |     |     |                |                |
| 3     | V\$GATA_C   | 0.901833 | 328 | (-) | NGATAAGNMNN    | TTGAATTATCT    |
| M0012 |             |          |     |     |                |                |
| 6     | V\$GATA1_02 | 0.844375 | 329 | (-) | NNNNNGATANKGNN | TGAATTATCTTTGT |
| M0012 |             |          |     |     |                |                |
| 7     | V\$GATA1_03 | 0.856688 | 329 | (-) | RNSNNGATAANNGN | TGAATTATCTTTGT |
| M0007 |             |          |     |     |                |                |
| 5     | V\$GATA1_01 | 0.792695 | 331 | (-) | SNNGATNNNN     | AATTATCTTT     |
| M0007 |             |          |     |     |                |                |
| 6     | V\$GATA2_01 | 0.847091 | 331 | (-) | NNNGATRNNN     | AATTATCTTT     |
| M0007 |             |          |     |     |                |                |
| 7     | V\$GATA3_01 | 0.866637 | 331 | (-) | NNGATARNG      | AATTATCTT      |
| M0007 |             |          |     |     |                |                |
| 7     | V\$GATA3_01 | 0.864865 | 377 | (-) | NNGATARNG      | TATAATCTT      |
| M0012 |             |          |     |     |                |                |
| 6     | V\$GATA1_02 | 0.855625 | 394 | (+) | NNNNNGATANKGNN | TCATGGATAAGAGC |
| M0012 |             |          |     |     |                |                |
| 7     | V\$GATA1_03 | 0.808672 | 394 | (+) | RNSNNGATAANNGN | TCATGGATAAGAGC |
| M0007 |             |          |     |     |                |                |
| 7     | V\$GATA3_01 | 0.849801 | 397 | (+) | NNGATARNG      | TGGATAAGA      |
| M0020 |             |          |     |     |                |                |
| 3     | V\$GATA_C   | 0.941286 | 398 | (+) | NGATAAGNMNN    | GGATAAGAGCA    |
| M0012 |             |          |     |     |                |                |
| 6     | V\$GATA1_02 | 0.775    | 471 | (+) | NNNNNGATANKGNN | TAAAGGATATGTCA |
| M0007 |             |          |     |     |                |                |
| 5     | V\$GATA1_01 | 0.818855 | 473 | (+) | SNNGATNNNN     | AAGGATATGT     |
| M0007 |             |          |     |     |                |                |
| 6     | V\$GATA2_01 | 0.882724 | 473 | (+) | NNNGATRNNN     | AAGGATATGT     |
| M0007 |             |          |     |     |                |                |
| 6     | V\$GATA2_01 | 0.810104 | 475 | (-) | NNNGATRNNN     | GGATATGTCA     |
| M0020 |             |          |     |     |                |                |
| 3     | V\$GATA_C   | 0.888475 | 475 | (+) | NGATAAGNMNN    | GGATATGTCAA    |
| M0012 |             |          |     |     |                |                |
| 6     | V\$GATA1_02 | 0.83625  | 482 | (+) | NNNNNGATANKGNN | TCAAAGATAGACAA |
| M0007 |             |          |     |     |                |                |
| 5     | V\$GATA1_01 | 0.803554 | 484 | (+) | SNNGATNNNN     | AAAGATAGAC     |
| M0007 |             |          |     |     |                |                |
| 6     | V\$GATA2_01 | 0.854759 | 484 | (+) | NNNGATRNNN     | AAAGATAGAC     |
| M0007 |             |          |     |     |                |                |
| 7     | V\$GATA3_01 | 0.875055 | 485 | (+) | NNGATARNG      | AAGATAGAC      |
| M0020 |             |          |     |     |                |                |
| 3     | V\$GATA_C   | 0.890028 | 486 | (+) | NGATAAGNMNN    | AGATAGACAAA    |
| M0012 |             |          |     |     |                |                |
| 6     | V\$GATA1_02 | 0.7875   | 494 | (+) | NNNNNGATANKGNN | AAATAGATATAACT |
| M0012 |             |          |     |     |                |                |
| 8     | V\$GATA1_04 | 0.825368 | 495 | (+) | NNCWGATARNNNN  | AATAGATATAACT  |
| M0012 |             |          |     |     |                |                |
| 7     | V\$GATA1_03 | 0.791524 | 496 | (+) | RNSNNGATAANNGN | ATAGATATAACTAA |
| M0007 |             |          |     |     |                |                |
| 7     | V\$GATA3_01 | 0.822331 | 497 | (+) | NNGATARNG      | TAGATATAA      |
| M0020 |             |          |     |     |                |                |
| 3     | V\$GATA_C   | 0.871699 | 498 | (+) | NGATAAGNMNN    | AGATATAACTA    |
| M0007 |             |          |     |     |                |                |
| 5     | V\$GATA1_01 | 0.857848 | 520 | (+) | SNNGATNNNN     | AAAGATGGTT     |
| M0007 |             |          |     |     |                |                |
| 6     | V\$GATA2_01 | 0.870095 | 520 | (+) | NNNGATRNNN     | AAAGATGGTT     |
| M0007 |             |          |     |     |                |                |
| 7     | V\$GATA3_01 | 0.841382 | 521 | (+) | NNGATARNG      | AAGATGGTT      |
| M0012 |             |          |     |     |                |                |
| 7     | V\$GATA1_03 | 0.820676 | 524 | (+) | RNSNNGATAANNGN | ATGTTATAGTTGG  |
| M0007 |             |          |     |     |                |                |
| 6     | V\$GATA2_01 | 0.823636 | 534 | (+) | NNNGATRNNN     | TTGGATATTC     |



|       |             |          |     |     |                 |                 |
|-------|-------------|----------|-----|-----|-----------------|-----------------|
| M0007 |             |          |     |     |                 |                 |
| 6     | V\$GATA2_01 | 0.789355 | 546 | (+) | NNNGATRNNN      | AAGGATGCAA      |
| M0012 |             |          |     |     |                 |                 |
| 6     | V\$GATA1_02 | 0.781875 | 554 | (+) | NNNNNGATANKGNN  | AAGTGGATAAAAAGT |
| M0012 |             |          |     |     |                 |                 |
| 7     | V\$GATA1_03 | 0.89319  | 554 | (+) | RNSNNGATAANNNGN | AAGTGGATAAAAAGT |
| M0012 |             |          |     |     |                 |                 |
| 8     | V\$GATA1_04 | 0.820772 | 555 | (+) | NNCWGATARNNNN   | AGTGGATAAAAAGT  |
| M0020 |             |          |     |     |                 |                 |
| 3     | V\$GATA_C   | 0.898105 | 558 | (+) | NGATAAGNMNN     | GGATAAAAAGTA    |
| M0007 |             |          |     |     |                 |                 |
| 5     | V\$GATA1_01 | 0.848963 | 615 | (+) | SNNGATNNNN      | TCAGATTCTG      |
| M0007 |             |          |     |     |                 |                 |
| 6     | V\$GATA2_01 | 0.862427 | 615 | (+) | NNNGATRNNN      | TCAGATTCTG      |
| M0007 |             |          |     |     |                 |                 |
| 7     | V\$GATA3_01 | 0.843155 | 616 | (+) | NNGATARNG       | CAGATTCTG       |
| M0012 |             |          |     |     |                 |                 |
| 6     | V\$GATA1_02 | 0.780312 | 640 | (-) | NNNNNGATANKGNN  | AACAGTATATATAA  |
| M0007 |             |          |     |     |                 |                 |
| 6     | V\$GATA2_01 | 0.800631 | 653 | (-) | NNNGATRNNN      | AAATATGGCG      |
| M0007 |             |          |     |     |                 |                 |
| 5     | V\$GATA1_01 | 0.801086 | 688 | (+) | SNNGATNNNN      | TATGATCTGT      |
| M0007 |             |          |     |     |                 |                 |
| 6     | V\$GATA2_01 | 0.824989 | 688 | (+) | NNNGATRNNN      | TATGATCTGT      |
| M0007 |             |          |     |     |                 |                 |
| 5     | V\$GATA1_01 | 0.775913 | 768 | (+) | SNNGATNNNN      | TTTGATGGAA      |
| M0012 |             |          |     |     |                 |                 |
| 6     | V\$GATA1_02 | 0.80625  | 790 | (+) | NNNNNGATANKGNN  | AACATGATATGACA  |
| M0012 |             |          |     |     |                 |                 |
| 8     | V\$GATA1_04 | 0.867953 | 791 | (+) | NNCWGATARNNNN   | ACATGATATGACA   |
| M0007 |             |          |     |     |                 |                 |
| 5     | V\$GATA1_01 | 0.877591 | 792 | (+) | SNNGATNNNN      | CATGATATGA      |
| M0007 |             |          |     |     |                 |                 |
| 6     | V\$GATA2_01 | 0.868742 | 792 | (+) | NNNGATRNNN      | CATGATATGA      |
| M0007 |             |          |     |     |                 |                 |
| 7     | V\$GATA3_01 | 0.863979 | 793 | (+) | NNGATARNG       | ATGATATGA       |
| M0020 |             |          |     |     |                 |                 |
| 3     | V\$GATA_C   | 0.89562  | 794 | (+) | NGATAAGNMNN     | TGATATGACAT     |
| M0007 |             |          |     |     |                 |                 |
| 5     | V\$GATA1_01 | 0.804541 | 799 | (-) | SNNGATNNNN      | TGACATCTGA      |
| M0007 |             |          |     |     |                 |                 |
| 6     | V\$GATA2_01 | 0.863329 | 799 | (-) | NNNGATRNNN      | TGACATCTGA      |
| M0007 |             |          |     |     |                 |                 |
| 5     | V\$GATA1_01 | 0.788746 | 805 | (-) | SNNGATNNNN      | CTGAATCTTA      |
| M0007 |             |          |     |     |                 |                 |
| 6     | V\$GATA2_01 | 0.814163 | 805 | (-) | NNNGATRNNN      | CTGAATCTTA      |
| M0007 |             |          |     |     |                 |                 |
| 7     | V\$GATA3_01 | 0.828977 | 805 | (-) | NNGATARNG       | CTGAATCTT       |
| M0007 |             |          |     |     |                 |                 |
| 5     | V\$GATA1_01 | 0.848963 | 813 | (+) | SNNGATNNNN      | TATGATTCTG      |
| M0007 |             |          |     |     |                 |                 |
| 6     | V\$GATA2_01 | 0.843031 | 813 | (+) | NNNGATRNNN      | TATGATTCTG      |
| M0007 |             |          |     |     |                 |                 |
| 7     | V\$GATA3_01 | 0.825432 | 814 | (+) | NNGATARNG       | ATGATTCTG       |
| M0012 |             |          |     |     |                 |                 |
| 7     | V\$GATA1_03 | 0.785154 | 854 | (+) | RNSNNGATAANNNGN | ATGGATATACCAAT  |
| M0020 |             |          |     |     |                 |                 |
| 3     | V\$GATA_C   | 0.851196 | 856 | (+) | NGATAAGNMNN     | GGATATACCAA     |
| M0012 |             |          |     |     |                 |                 |
| 6     | V\$GATA1_02 | 0.842187 | 915 | (+) | NNNNNGATANKGNN  | TGGAAGATAAGTTT  |
| M0012 |             |          |     |     |                 |                 |
| 7     | V\$GATA1_03 | 0.822636 | 915 | (+) | RNSNNGATAANNNGN | TGGAAGATAAGTTT  |
| M0012 |             |          |     |     |                 |                 |
| 8     | V\$GATA1_04 | 0.897672 | 916 | (+) | NNCWGATARNNNN   | GGAAGATAAGTTT   |
| M0007 |             |          |     |     |                 |                 |
| 5     | V\$GATA1_01 | 0.869694 | 917 | (+) | SNNGATNNNN      | GAAGATAAGT      |

|       |             |          |      |     |                |                |
|-------|-------------|----------|------|-----|----------------|----------------|
| M0007 |             |          |      |     |                |                |
| 6     | V\$GATA2_01 | 0.900316 | 917  | (+) | NNNGATRNNN     | GAAGATAAGT     |
| M0007 |             |          |      |     |                |                |
| 7     | V\$GATA3_01 | 0.887461 | 918  | (+) | NNGATARNG      | AAGATAAGT      |
| M0020 |             |          |      |     |                |                |
| 3     | V\$GATA_C   | 0.923268 | 919  | (+) | NGATAAGNMNN    | AGATAAGTTTC    |
| M0012 |             |          |      |     |                |                |
| 6     | V\$GATA1_02 | 0.778125 | 927  | (+) | NNNNNGATANKGNN | TTCTATATAATGCA |
| M0007 |             |          |      |     |                |                |
| 5     | V\$GATA1_01 | 0.882034 | 974  | (+) | SNNGATNNNN     | CAGGATGCTC     |
| M0007 |             |          |      |     |                |                |
| 6     | V\$GATA2_01 | 0.897158 | 974  | (+) | NNNGATRNNN     | CAGGATGCTC     |
| M0007 |             |          |      |     |                |                |
| 7     | V\$GATA3_01 | 0.839167 | 1024 | (+) | NNGATARNG      | CAGATTAAA      |
| M0007 |             |          |      |     |                |                |
| 5     | V\$GATA1_01 | 0.771964 | 1073 | (-) | SNNGATNNNN     | ACAAATCTAA     |
| M0020 |             |          |      |     |                |                |
| 3     | V\$GATA_C   | 0.858652 | 1167 | (+) | NGATAAGNMNN    | TGACAAAACCC    |
| M0012 |             |          |      |     |                |                |
| 6     | V\$GATA1_02 | 0.789062 | 1173 | (-) | NNNNNGATANKGNN | AACCCTATTACCAC |
| M0012 |             |          |      |     |                |                |
| 7     | V\$GATA1_03 | 0.787849 | 1176 | (-) | RNSNNGATAANNGN | CCTATTACCACTTC |
| M0007 |             |          |      |     |                |                |
| 5     | V\$GATA1_01 | 0.770977 | 1213 | (+) | SNNGATNNNN     | AGTGTTAGTG     |
| M0012 |             |          |      |     |                |                |
| 7     | V\$GATA1_03 | 0.795198 | 1230 | (+) | RNSNNGATAANNGN | ATATTAATAAGAGA |
| M0020 |             |          |      |     |                |                |
| 3     | V\$GATA_C   | 0.974216 | 1249 | (-) | NGATAAGNMNN    | ATTTCTTATCT    |
| M0012 |             |          |      |     |                |                |
| 6     | V\$GATA1_02 | 0.821875 | 1250 | (-) | NNNNNGATANKGNN | TTTCTTATCTCACA |
| M0012 |             |          |      |     |                |                |
| 8     | V\$GATA1_04 | 0.930147 | 1250 | (-) | NNCWGATARNNNN  | TTTCTTATCTCAC  |
| M0007 |             |          |      |     |                |                |
| 5     | V\$GATA1_01 | 0.806515 | 1252 | (-) | SNNGATNNNN     | TCTTATCTCA     |
| M0007 |             |          |      |     |                |                |
| 6     | V\$GATA2_01 | 0.864231 | 1252 | (-) | NNNGATRNNN     | TCTTATCTCA     |
| M0007 |             |          |      |     |                |                |
| 7     | V\$GATA3_01 | 0.936642 | 1252 | (-) | NNGATARNG      | TCTTATCTC      |
| M0012 |             |          |      |     |                |                |
| 6     | V\$GATA1_02 | 0.7975   | 1273 | (+) | NNNNNGATANKGNN | AGCAAGATAATTTG |
| M0012 |             |          |      |     |                |                |
| 7     | V\$GATA1_03 | 0.914993 | 1273 | (+) | RNSNNGATAANNGN | AGCAAGATAATTTG |
| M0012 |             |          |      |     |                |                |
| 8     | V\$GATA1_04 | 0.85386  | 1274 | (+) | NNCWGATARNNNN  | GCAAGATAATTTG  |
| M0007 |             |          |      |     |                |                |
| 5     | V\$GATA1_01 | 0.861797 | 1275 | (+) | SNNGATNNNN     | CAAGATAATT     |
| M0007 |             |          |      |     |                |                |
| 6     | V\$GATA2_01 | 0.888588 | 1275 | (+) | NNNGATRNNN     | CAAGATAATT     |
| M0007 |             |          |      |     |                |                |
| 7     | V\$GATA3_01 | 0.866637 | 1276 | (+) | NNGATARNG      | AAGATAATT      |
| M0007 |             |          |      |     |                |                |
| 5     | V\$GATA1_01 | 0.826259 | 1386 | (-) | SNNGATNNNN     | GGAAATCAAG     |
| M0007 |             |          |      |     |                |                |
| 5     | V\$GATA1_01 | 0.782823 | 1393 | (+) | SNNGATNNNN     | AAGGATTTTT     |
| M0007 |             |          |      |     |                |                |
| 6     | V\$GATA2_01 | 0.811908 | 1393 | (+) | NNNGATRNNN     | AAGGATTTTT     |
| M0020 |             |          |      |     |                |                |
| 3     | V\$GATA_C   | 0.884126 | 1422 | (-) | NGATAAGNMNN    | TTTTATTATCA    |
| M0012 |             |          |      |     |                |                |
| 6     | V\$GATA1_02 | 0.78375  | 1423 | (-) | NNNNNGATANKGNN | TTTATTATCAGACC |
| M0012 |             |          |      |     |                |                |
| 7     | V\$GATA1_03 | 0.823616 | 1423 | (-) | RNSNNGATAANNGN | TTTATTATCAGACC |
| M0012 |             |          |      |     |                |                |
| 8     | V\$GATA1_04 | 0.90625  | 1423 | (-) | NNCWGATARNNNN  | TTTATTATCAGAC  |
| M0007 |             |          |      |     |                |                |
| 5     | V\$GATA1_01 | 0.807009 | 1425 | (-) | SNNGATNNNN     | TATTATCAGA     |

|       |             |          |      |     |                |                |
|-------|-------------|----------|------|-----|----------------|----------------|
| M0007 |             |          |      |     |                |                |
| 6     | V\$GATA2_01 | 0.84664  | 1425 | (-) | NNNGATRNNN     | TATTATCAGA     |
| M0007 |             |          |      |     |                |                |
| 7     | V\$GATA3_01 | 0.869296 | 1425 | (-) | NNGATARNG      | TATTATCAG      |
| M0012 |             |          |      |     |                |                |
| 8     | V\$GATA1_04 | 0.821385 | 1440 | (-) | NNCWGATARNNNN  | CTCTTTTCTGTT   |
| M0012 |             |          |      |     |                |                |
| 7     | V\$GATA1_03 | 0.784664 | 1455 | (-) | RNSNNGATAANNGN | TTTCTTACCTAGGT |
| M0012 |             |          |      |     |                |                |
| 7     | V\$GATA1_03 | 0.815532 | 1482 | (-) | RNSNNGATAANNGN | AAGCTTCTCATCCT |
| M0012 |             |          |      |     |                |                |
| 7     | V\$GATA1_03 | 0.790544 | 1485 | (-) | RNSNNGATAANNGN | CTTCTCATCCTTAC |
| M0007 |             |          |      |     |                |                |
| 6     | V\$GATA2_01 | 0.809653 | 1487 | (-) | NNNGATRNNN     | TCTCATCCTT     |
| M0007 |             |          |      |     |                |                |
| 7     | V\$GATA3_01 | 0.820558 | 1487 | (-) | NNGATARNG      | TCTCATCCT      |
| M0012 |             |          |      |     |                |                |
| 7     | V\$GATA1_03 | 0.843459 | 1491 | (-) | RNSNNGATAANNGN | ATCCTTACCTGCCT |
| M0012 |             |          |      |     |                |                |
| 8     | V\$GATA1_04 | 0.836091 | 1491 | (-) | NNCWGATARNNNN  | ATCCTTACCTGCC  |
| M0007 |             |          |      |     |                |                |
| 5     | V\$GATA1_01 | 0.788253 | 1509 | (+) | SNNGATNNNN     | GCTGTTGCGC     |
| M0007 |             |          |      |     |                |                |
| 5     | V\$GATA1_01 | 0.865745 | 1571 | (-) | SNNGATNNNN     | TGAAATCACC     |
| M0007 |             |          |      |     |                |                |
| 6     | V\$GATA2_01 | 0.830401 | 1571 | (-) | NNNGATRNNN     | TGAAATCACC     |
| M0012 |             |          |      |     |                |                |
| 8     | V\$GATA1_04 | 0.859988 | 1578 | (+) | NNCWGATARNNNN  | ACCTGATATCACA  |
| M0007 |             |          |      |     |                |                |
| 5     | V\$GATA1_01 | 0.885982 | 1579 | (+) | SNNGATNNNN     | CCTGATATCA     |
| M0007 |             |          |      |     |                |                |
| 6     | V\$GATA2_01 | 0.88949  | 1579 | (+) | NNNGATRNNN     | CCTGATATCA     |
| M0012 |             |          |      |     |                |                |
| 8     | V\$GATA1_04 | 0.861213 | 1579 | (-) | NNCWGATARNNNN  | CCTGATATCACAT  |
| M0007 |             |          |      |     |                |                |
| 7     | V\$GATA3_01 | 0.821444 | 1580 | (+) | NNGATARNG      | CTGATATCA      |
| M0007 |             |          |      |     |                |                |
| 5     | V\$GATA1_01 | 0.833169 | 1581 | (-) | SNNGATNNNN     | TGATATCACA     |
| M0007 |             |          |      |     |                |                |
| 6     | V\$GATA2_01 | 0.880469 | 1581 | (-) | NNNGATRNNN     | TGATATCACA     |
| M0007 |             |          |      |     |                |                |
| 7     | V\$GATA3_01 | 0.844484 | 1581 | (-) | NNGATARNG      | TGATATCAC      |
| M0007 |             |          |      |     |                |                |
| 5     | V\$GATA1_01 | 0.780849 | 1586 | (-) | SNNGATNNNN     | TCACATCAAA     |
| M0012 |             |          |      |     |                |                |
| 6     | V\$GATA1_02 | 0.842812 | 1596 | (+) | NNNNNGATANKGNN | CACAAGATACTGAG |
| M0012 |             |          |      |     |                |                |
| 7     | V\$GATA1_03 | 0.841989 | 1596 | (+) | RNSNNGATAANNGN | CACAAGATACTGAG |
| M0012 |             |          |      |     |                |                |
| 8     | V\$GATA1_04 | 0.829044 | 1597 | (+) | NNCWGATARNNNN  | ACAAGATACTGAG  |
| M0007 |             |          |      |     |                |                |
| 5     | V\$GATA1_01 | 0.912636 | 1598 | (+) | SNNGATNNNN     | CAAGATACTG     |
| M0007 |             |          |      |     |                |                |
| 6     | V\$GATA2_01 | 0.92783  | 1598 | (+) | NNNGATRNNN     | CAAGATACTG     |
| M0007 |             |          |      |     |                |                |
| 7     | V\$GATA3_01 | 0.882588 | 1599 | (+) | NNGATARNG      | AAGATACTG      |
| M0012 |             |          |      |     |                |                |
| 7     | V\$GATA1_03 | 0.784174 | 1602 | (+) | RNSNNGATAANNGN | ATACTGAGAATAAT |
| M0012 |             |          |      |     |                |                |
| 7     | V\$GATA1_03 | 0.784174 | 1605 | (+) | RNSNNGATAANNGN | CTGAGAATAATAAA |
| M0007 |             |          |      |     |                |                |
| 6     | V\$GATA2_01 | 0.780334 | 1622 | (+) | NNNGATRNNN     | TTGGATGATC     |
| M0007 |             |          |      |     |                |                |
| 5     | V\$GATA1_01 | 0.845015 | 1625 | (+) | SNNGATNNNN     | GATGATCTCT     |
| M0007 |             |          |      |     |                |                |
| 6     | V\$GATA2_01 | 0.852052 | 1625 | (+) | NNNGATRNNN     | GATGATCTCT     |

|       |             |          |      |     |                |                |
|-------|-------------|----------|------|-----|----------------|----------------|
| M0007 |             |          |      |     |                |                |
| 6     | V\$GATA2_01 | 0.7871   | 1625 | (-) | NNNGATRNNN     | GATGATCTCT     |
| M0012 |             |          |      |     |                |                |
| 6     | V\$GATA1_02 | 0.807187 | 1649 | (+) | NNNNNGATANKGNN | GTCTTGATATTA   |
| M0007 |             |          |      |     |                |                |
| 5     | V\$GATA1_01 | 0.82922  | 1651 | (+) | SNNGATNNNN     | CTTGATATTA     |
| M0007 |             |          |      |     |                |                |
| 6     | V\$GATA2_01 | 0.780785 | 1651 | (+) | NNNGATRNNN     | CTTGATATTA     |
| M0007 |             |          |      |     |                |                |
| 6     | V\$GATA2_01 | 0.811908 | 1662 | (-) | NNNGATRNNN     | AACTATGATA     |
| M0012 |             |          |      |     |                |                |
| 6     | V\$GATA1_02 | 0.797187 | 1663 | (+) | NNNNNGATANKGNN | ACTATGATAATCCT |
| M0012 |             |          |      |     |                |                |
| 7     | V\$GATA1_03 | 0.796178 | 1663 | (+) | RNSNNGATAANNGN | ACTATGATAATCCT |
| M0012 |             |          |      |     |                |                |
| 8     | V\$GATA1_04 | 0.8125   | 1664 | (+) | NNCWGATARNNNN  | CTATGATAATCCT  |
| M0007 |             |          |      |     |                |                |
| 5     | V\$GATA1_01 | 0.807009 | 1665 | (+) | SNNGATNNNN     | TATGATAATC     |
| M0007 |             |          |      |     |                |                |
| 6     | V\$GATA2_01 | 0.864682 | 1665 | (+) | NNNGATRNNN     | TATGATAATC     |
| M0007 |             |          |      |     |                |                |
| 7     | V\$GATA3_01 | 0.843155 | 1666 | (+) | NNGATARNG      | ATGATAATC      |
| M0020 |             |          |      |     |                |                |
| 3     | V\$GATA_C   | 0.882883 | 1667 | (+) | NGATAAGNMNN    | TGATAATCCTT    |
| M0007 |             |          |      |     |                |                |
| 6     | V\$GATA2_01 | 0.793415 | 1668 | (-) | NNNGATRNNN     | GATAATCCTT     |
| M0007 |             |          |      |     |                |                |
| 5     | V\$GATA1_01 | 0.780355 | 1724 | (-) | SNNGATNNNN     | TAAAATCTCT     |
| M0007 |             |          |      |     |                |                |
| 7     | V\$GATA3_01 | 0.850244 | 1724 | (-) | NNGATARNG      | TAAAATCTC      |
| M0007 |             |          |      |     |                |                |
| 5     | V\$GATA1_01 | 0.776407 | 1743 | (-) | SNNGATNNNN     | ATAAATCTCT     |
| M0012 |             |          |      |     |                |                |
| 6     | V\$GATA1_02 | 0.800625 | 1751 | (+) | NNNNNGATANKGNN | CTCATGATAAAAAA |
| M0012 |             |          |      |     |                |                |
| 7     | V\$GATA1_03 | 0.855708 | 1751 | (+) | RNSNNGATAANNGN | CTCATGATAAAAAA |
| M0012 |             |          |      |     |                |                |
| 8     | V\$GATA1_04 | 0.892463 | 1752 | (+) | NNCWGATARNNNN  | TCATGATAAAAAA  |
| M0007 |             |          |      |     |                |                |
| 5     | V\$GATA1_01 | 0.807502 | 1753 | (+) | SNNGATNNNN     | CATGATAAAA     |
| M0007 |             |          |      |     |                |                |
| 6     | V\$GATA2_01 | 0.807397 | 1753 | (+) | NNNGATRNNN     | CATGATAAAA     |
| M0007 |             |          |      |     |                |                |
| 7     | V\$GATA3_01 | 0.855117 | 1754 | (+) | NNGATARNG      | ATGATAAAA      |
| M0020 |             |          |      |     |                |                |
| 3     | V\$GATA_C   | 0.936626 | 1755 | (+) | NGATAAGNMNN    | TGATAAAAAAT    |
| M0012 |             |          |      |     |                |                |
| 7     | V\$GATA1_03 | 0.784174 | 1764 | (+) | RNSNNGATAANNGN | ATAATAATAATAAT |
| M0012 |             |          |      |     |                |                |
| 7     | V\$GATA1_03 | 0.784174 | 1767 | (+) | RNSNNGATAANNGN | ATAATAATAATAAA |
| M0012 |             |          |      |     |                |                |
| 6     | V\$GATA1_02 | 0.80125  | 1794 | (+) | NNNNNGATANKGNN | GAAGAAATAAGGTA |
| M0007 |             |          |      |     |                |                |
| 5     | V\$GATA1_01 | 0.825271 | 1803 | (-) | SNNGATNNNN     | AGGTATCAAA     |
| M0007 |             |          |      |     |                |                |
| 6     | V\$GATA2_01 | 0.831755 | 1803 | (-) | NNNGATRNNN     | AGGTATCAAA     |
| M0007 |             |          |      |     |                |                |
| 5     | V\$GATA1_01 | 0.810464 | 1825 | (-) | SNNGATNNNN     | GAGCATCAAA     |
| M0007 |             |          |      |     |                |                |
| 6     | V\$GATA2_01 | 0.780785 | 1825 | (-) | NNNGATRNNN     | GAGCATCAAA     |
| M0007 |             |          |      |     |                |                |
| 5     | V\$GATA1_01 | 0.820336 | 1856 | (-) | SNNGATNNNN     | CTGCATCCGT     |
| M0007 |             |          |      |     |                |                |
| 6     | V\$GATA2_01 | 0.840325 | 1856 | (-) | NNNGATRNNN     | CTGCATCCGT     |
| M0012 |             |          |      |     |                |                |
| 6     | V\$GATA1_02 | 0.772813 | 1939 | (-) | NNNNNGATANKGNN | TCCAGTATTTCTA  |

|       |             |          |      |     |                |                 |
|-------|-------------|----------|------|-----|----------------|-----------------|
| M0007 |             |          |      |     |                |                 |
| 5     | V\$GATA1_01 | 0.847976 | 1980 | (+) | SNNGATNNNN     | TGAGATGTCT      |
| M0007 |             |          |      |     |                |                 |
| 6     | V\$GATA2_01 | 0.893099 | 1980 | (+) | NNNGATRNNN     | TGAGATGTCT      |
| M0012 |             |          |      |     |                |                 |
| 7     | V\$GATA1_03 | 0.784174 | 2013 | (+) | RNSNNGATAANNGN | GTATAGAAAATCAG  |
| M0007 |             |          |      |     |                |                 |
| 5     | V\$GATA1_01 | 0.883021 | 2018 | (-) | SNNGATNNNN     | GAAAATCAGG      |
| M0007 |             |          |      |     |                |                 |
| 6     | V\$GATA2_01 | 0.832206 | 2018 | (-) | NNNGATRNNN     | GAAAATCAGG      |
| M0007 |             |          |      |     |                |                 |
| 5     | V\$GATA1_01 | 0.917078 | 2036 | (+) | SNNGATNNNN     | GCTGATTGG       |
| M0007 |             |          |      |     |                |                 |
| 6     | V\$GATA2_01 | 0.860622 | 2036 | (+) | NNNGATRNNN     | GCTGATTGG       |
| M0007 |             |          |      |     |                |                 |
| 7     | V\$GATA3_01 | 0.859548 | 2037 | (+) | NNGATARNG      | CTGATTGG        |
| M0007 |             |          |      |     |                |                 |
| 5     | V\$GATA1_01 | 0.852419 | 2044 | (+) | SNNGATNNNN     | GGAGATTGAA      |
| M0007 |             |          |      |     |                |                 |
| 6     | V\$GATA2_01 | 0.819125 | 2044 | (+) | NNNGATRNNN     | GGAGATTGAA      |
| M0007 |             |          |      |     |                |                 |
| 7     | V\$GATA3_01 | 0.890563 | 2045 | (+) | NNGATARNG      | GAGATTGAA       |
| M0012 |             |          |      |     |                |                 |
| 6     | V\$GATA1_02 | 0.860625 | 2080 | (+) | NNNNNGATANKGNN | AATTAGATAATGTA  |
| M0012 |             |          |      |     |                |                 |
| 7     | V\$GATA1_03 | 0.78295  | 2080 | (+) | RNSNNGATAANNGN | AATTAGATAATGTA  |
| M0012 |             |          |      |     |                |                 |
| 8     | V\$GATA1_04 | 0.83701  | 2081 | (+) | NNCWGATARNNNN  | ATTAGATAATGTA   |
| M0007 |             |          |      |     |                |                 |
| 5     | V\$GATA1_01 | 0.776407 | 2082 | (+) | SNNGATNNNN     | TTAGATAATG      |
| M0007 |             |          |      |     |                |                 |
| 6     | V\$GATA2_01 | 0.811006 | 2082 | (+) | NNNGATRNNN     | TTAGATAATG      |
| M0007 |             |          |      |     |                |                 |
| 7     | V\$GATA3_01 | 0.909171 | 2083 | (+) | NNGATARNG      | TAGATAATG       |
| M0020 |             |          |      |     |                |                 |
| 3     | V\$GATA_C   | 0.863312 | 2084 | (+) | NGATAAGNMNN    | AGATAATGTAA     |
| M0012 |             |          |      |     |                |                 |
| 6     | V\$GATA1_02 | 0.779687 | 2104 | (-) | NNNNNGATANKGNN | ACCCTTCTCAAAAA  |
| M0007 |             |          |      |     |                |                 |
| 5     | V\$GATA1_01 | 0.835637 | 2175 | (+) | SNNGATNNNN     | TGTGATGCAC      |
| M0007 |             |          |      |     |                |                 |
| 6     | V\$GATA2_01 | 0.830401 | 2175 | (+) | NNNGATRNNN     | TGTGATGCAC      |
| M0012 |             |          |      |     |                |                 |
| 6     | V\$GATA1_02 | 0.781875 | 2181 | (+) | NNNNNGATANKGNN | GCACAGCTAGTGCA  |
| M0012 |             |          |      |     |                |                 |
| 6     | V\$GATA1_02 | 0.78625  | 2192 | (+) | NNNNNGATANKGNN | GCAGTGAAAGGAGT  |
| M0007 |             |          |      |     |                |                 |
| 5     | V\$GATA1_01 | 0.922507 | 2210 | (-) | SNNGATNNNN     | AGGAATCACC      |
| M0007 |             |          |      |     |                |                 |
| 6     | V\$GATA2_01 | 0.871448 | 2210 | (-) | NNNGATRNNN     | AGGAATCACC      |
| M0012 |             |          |      |     |                |                 |
| 8     | V\$GATA1_04 | 0.810662 | 2217 | (+) | NNCWGATARNNNN  | ACCTGACAAGAAA   |
| M0020 |             |          |      |     |                |                 |
| 3     | V\$GATA_C   | 0.871078 | 2220 | (+) | NGATAAGNMNN    | TGACAAGAAAA     |
| M0012 |             |          |      |     |                |                 |
| 7     | V\$GATA1_03 | 0.784174 | 2221 | (+) | RNSNNGATAANNGN | GACAAGAAAACAAT  |
| M0012 |             |          |      |     |                |                 |
| 6     | V\$GATA1_02 | 0.805313 | 2233 | (+) | NNNNNGATANKGNN | ATTCAGATAAAAATA |
| M0012 |             |          |      |     |                |                 |
| 7     | V\$GATA1_03 | 0.790299 | 2233 | (+) | RNSNNGATAANNGN | ATTCAGATAAAAATA |
| M0012 |             |          |      |     |                |                 |
| 8     | V\$GATA1_04 | 0.896446 | 2234 | (+) | NNCWGATARNNNN  | TTCAGATAAAAATA  |
| M0007 |             |          |      |     |                |                 |
| 6     | V\$GATA2_01 | 0.817772 | 2235 | (+) | NNNGATRNNN     | TCAGATAAAA      |
| M0007 |             |          |      |     |                |                 |
| 7     | V\$GATA3_01 | 0.87284  | 2236 | (+) | NNGATARNG      | CAGATAAAA       |

|       |             |          |      |     |                |                |
|-------|-------------|----------|------|-----|----------------|----------------|
| M0020 |             |          |      |     |                |                |
| 3     | V\$GATA_C   | 0.903075 | 2237 | (+) | NGATAAGNMNN    | AGATAAAATAA    |
| M0007 |             |          |      |     |                |                |
| 5     | V\$GATA1_01 | 0.800099 | 2253 | (+) | SNNGATNNNN     | TTGGATGCTT     |
| M0007 |             |          |      |     |                |                |
| 6     | V\$GATA2_01 | 0.810104 | 2253 | (+) | NNNGATRNNN     | TTGGATGCTT     |
| M0007 |             |          |      |     |                |                |
| 5     | V\$GATA1_01 | 0.790227 | 2261 | (+) | SNNGATNNNN     | TTGGATATTG     |
| M0007 |             |          |      |     |                |                |
| 6     | V\$GATA2_01 | 0.840325 | 2261 | (+) | NNNGATRNNN     | TTGGATATTG     |
| M0007 |             |          |      |     |                |                |
| 7     | V\$GATA3_01 | 0.832078 | 2262 | (+) | NNGATARNG      | TGGATATTG      |
| M0012 |             |          |      |     |                |                |
| 6     | V\$GATA1_02 | 0.8125   | 2270 | (-) | NNNNNGATANKGNN | GAAACTATCAAATA |
| M0007 |             |          |      |     |                |                |
| 5     | V\$GATA1_01 | 0.850938 | 2272 | (-) | SNNGATNNNN     | AACTATCAAA     |
| M0007 |             |          |      |     |                |                |
| 6     | V\$GATA2_01 | 0.838069 | 2272 | (-) | NNNGATRNNN     | AACTATCAAA     |
| M0007 |             |          |      |     |                |                |
| 7     | V\$GATA3_01 | 0.847142 | 2272 | (-) | NNGATARNG      | AACTATCAA      |
| M0007 |             |          |      |     |                |                |
| 5     | V\$GATA1_01 | 0.777887 | 2283 | (+) | SNNGATNNNN     | ACAGATGCAA     |
| M0007 |             |          |      |     |                |                |
| 6     | V\$GATA2_01 | 0.78304  | 2283 | (+) | NNNGATRNNN     | ACAGATGCAA     |
| M0012 |             |          |      |     |                |                |
| 6     | V\$GATA1_02 | 0.828125 | 2304 | (+) | NNNNNGATANKGNN | GCTGAGATACTCTA |
| M0007 |             |          |      |     |                |                |
| 5     | V\$GATA1_01 | 0.854393 | 2306 | (+) | SNNGATNNNN     | TGAGATACTC     |
| M0007 |             |          |      |     |                |                |
| 6     | V\$GATA2_01 | 0.910239 | 2306 | (+) | NNNGATRNNN     | TGAGATACTC     |
| M0007 |             |          |      |     |                |                |
| 7     | V\$GATA3_01 | 0.832964 | 2307 | (+) | NNGATARNG      | GAGATACTC      |
| M0012 |             |          |      |     |                |                |
| 7     | V\$GATA1_03 | 0.784664 | 2325 | (-) | RNSNNGATAANNGN | CTAATTTTCTATAT |
| M0020 |             |          |      |     |                |                |
| 3     | V\$GATA_C   | 0.86238  | 2330 | (-) | NGATAAGNMNN    | TTTCTATATCC    |
| M0007 |             |          |      |     |                |                |
| 5     | V\$GATA1_01 | 0.791214 | 2355 | (+) | SNNGATNNNN     | CAGGATCACC     |
| M0007 |             |          |      |     |                |                |
| 5     | V\$GATA1_01 | 0.906219 | 2355 | (-) | SNNGATNNNN     | CAGGATCACC     |
| M0007 |             |          |      |     |                |                |
| 6     | V\$GATA2_01 | 0.853857 | 2355 | (+) | NNNGATRNNN     | CAGGATCACC     |
| M0007 |             |          |      |     |                |                |
| 6     | V\$GATA2_01 | 0.865584 | 2355 | (-) | NNNGATRNNN     | CAGGATCACC     |
| M0012 |             |          |      |     |                |                |
| 7     | V\$GATA1_03 | 0.83366  | 2375 | (-) | RNSNNGATAANNGN | CTTCTTAACCTCTT |
| M0012 |             |          |      |     |                |                |
| 8     | V\$GATA1_04 | 0.813113 | 2375 | (-) | NNCWGATARNNNN  | CTTCTTAACCTCT  |
| M0007 |             |          |      |     |                |                |
| 5     | V\$GATA1_01 | 0.815893 | 2430 | (-) | SNNGATNNNN     | AGAAATCTCT     |
| M0007 |             |          |      |     |                |                |
| 6     | V\$GATA2_01 | 0.824538 | 2430 | (-) | NNNGATRNNN     | AGAAATCTCT     |
| M0012 |             |          |      |     |                |                |
| 6     | V\$GATA1_02 | 0.781875 | 2476 | (-) | NNNNNGATANKGNN | AAATGTATCATTGG |
| M0007 |             |          |      |     |                |                |
| 5     | V\$GATA1_01 | 0.813425 | 2478 | (-) | SNNGATNNNN     | ATGTATCATT     |
| M0007 |             |          |      |     |                |                |
| 6     | V\$GATA2_01 | 0.821831 | 2478 | (-) | NNNGATRNNN     | ATGTATCATT     |
| M0020 |             |          |      |     |                |                |
| 3     | V\$GATA_C   | 0.99503  | 2493 | (-) | NGATAAGNMNN    | AGTCCTTATCT    |
| M0012 |             |          |      |     |                |                |
| 6     | V\$GATA1_02 | 0.873437 | 2494 | (-) | NNNNNGATANKGNN | GTCCTTATCTTGTT |
| M0012 |             |          |      |     |                |                |
| 7     | V\$GATA1_03 | 0.930181 | 2494 | (-) | RNSNNGATAANNGN | GTCCTTATCTTGTT |
| M0012 |             |          |      |     |                |                |
| 8     | V\$GATA1_04 | 0.962316 | 2494 | (-) | NNCWGATARNNNN  | GTCCTTATCTTGT  |

|       |             |          |      |     |                |                 |
|-------|-------------|----------|------|-----|----------------|-----------------|
| M0007 |             |          |      |     |                |                 |
| 5     | V\$GATA1_01 | 0.885489 | 2496 | (-) | SNNGATNNNN     | CCTTATCTTG      |
| M0007 |             |          |      |     |                |                 |
| 6     | V\$GATA2_01 | 0.907984 | 2496 | (-) | NNNGATRNNN     | CCTTATCTTG      |
| M0007 |             |          |      |     |                |                 |
| 7     | V\$GATA3_01 | 0.954364 | 2496 | (-) | NNGATARNG      | CCTTATCTT       |
| M0007 |             |          |      |     |                |                 |
| 5     | V\$GATA1_01 | 0.85538  | 2579 | (-) | SNNGATNNNN     | CCACATCATT      |
| M0007 |             |          |      |     |                |                 |
| 6     | V\$GATA2_01 | 0.841678 | 2579 | (-) | NNNGATRNNN     | CCACATCATT      |
| M0007 |             |          |      |     |                |                 |
| 7     | V\$GATA3_01 | 0.84537  | 2579 | (-) | NNGATARNG      | CCACATCAT       |
| M0007 |             |          |      |     |                |                 |
| 5     | V\$GATA1_01 | 0.870681 | 2638 | (+) | SNNGATNNNN     | GAAGATTGAG      |
| M0007 |             |          |      |     |                |                 |
| 6     | V\$GATA2_01 | 0.853857 | 2638 | (+) | NNNGATRNNN     | GAAGATTGAG      |
| M0007 |             |          |      |     |                |                 |
| 7     | V\$GATA3_01 | 0.908285 | 2639 | (+) | NNGATARNG      | AAGATTGAG       |
| M0012 |             |          |      |     |                |                 |
| 6     | V\$GATA1_02 | 0.791562 | 2642 | (+) | NNNNNGATANKGNN | ATTGAGATAAAATTT |
| M0012 |             |          |      |     |                |                 |
| 7     | V\$GATA1_03 | 0.78099  | 2642 | (+) | RNSNNGATAANNGN | ATTGAGATAAAATTT |
| M0012 |             |          |      |     |                |                 |
| 8     | V\$GATA1_04 | 0.872549 | 2643 | (+) | NNCWGATARNNNN  | TTGAGATAAAATTT  |
| M0007 |             |          |      |     |                |                 |
| 5     | V\$GATA1_01 | 0.790227 | 2644 | (+) | SNNGATNNNN     | TGAGATAAAAT     |
| M0007 |             |          |      |     |                |                 |
| 6     | V\$GATA2_01 | 0.847542 | 2644 | (+) | NNNGATRNNN     | TGAGATAAAAT     |
| M0007 |             |          |      |     |                |                 |
| 7     | V\$GATA3_01 | 0.863979 | 2645 | (+) | NNGATARNG      | GAGATAAAAT      |
| M0020 |             |          |      |     |                |                 |
| 3     | V\$GATA_C   | 0.907735 | 2646 | (+) | NGATAAGNMNN    | AGATAAAATTTT    |
| M0012 |             |          |      |     |                |                 |
| 6     | V\$GATA1_02 | 0.826875 | 2669 | (+) | NNNNNGATANKGNN | TTGGTGATAGAAAT  |
| M0012 |             |          |      |     |                |                 |
| 7     | V\$GATA1_03 | 0.78197  | 2669 | (+) | RNSNNGATAANNGN | TTGGTGATAGAAAT  |
| M0012 |             |          |      |     |                |                 |
| 8     | V\$GATA1_04 | 0.88511  | 2670 | (+) | NNCWGATARNNNN  | TTGGTGATAGAAAT  |
| M0007 |             |          |      |     |                |                 |
| 5     | V\$GATA1_01 | 0.896841 | 2671 | (+) | SNNGATNNNN     | GGTGATAGAA      |
| M0007 |             |          |      |     |                |                 |
| 6     | V\$GATA2_01 | 0.87235  | 2671 | (+) | NNNGATRNNN     | GGTGATAGAA      |
| M0007 |             |          |      |     |                |                 |
| 7     | V\$GATA3_01 | 0.900753 | 2672 | (+) | NNGATARNG      | GTGATAGAA       |
| M0020 |             |          |      |     |                |                 |
| 3     | V\$GATA_C   | 0.885368 | 2673 | (+) | NGATAAGNMNN    | TGATAGAAATA     |
| M0007 |             |          |      |     |                |                 |
| 5     | V\$GATA1_01 | 0.780355 | 2682 | (-) | SNNGATNNNN     | TAAAATCCAG      |
| M0012 |             |          |      |     |                |                 |
| 7     | V\$GATA1_03 | 0.823861 | 2686 | (+) | RNSNNGATAANNGN | ATCCAGACAAGCAA  |
| M0020 |             |          |      |     |                |                 |
| 3     | V\$GATA_C   | 0.867971 | 2690 | (+) | NGATAAGNMNN    | AGACAAGCAAC     |
| M0007 |             |          |      |     |                |                 |
| 5     | V\$GATA1_01 | 0.779862 | 2795 | (-) | SNNGATNNNN     | CTAAATCATT      |
| M0007 |             |          |      |     |                |                 |
| 7     | V\$GATA3_01 | 0.824546 | 2795 | (-) | NNGATARNG      | CTAAATCAT       |
| M0020 |             |          |      |     |                |                 |
| 3     | V\$GATA_C   | 0.937558 | 2803 | (-) | NGATAAGNMNN    | TTTCTTTATCA     |
| M0012 |             |          |      |     |                |                 |
| 6     | V\$GATA1_02 | 0.804375 | 2804 | (-) | NNNNNGATANKGNN | TTCTTTATCATTCT  |
| M0012 |             |          |      |     |                |                 |
| 7     | V\$GATA1_03 | 0.882166 | 2804 | (-) | RNSNNGATAANNGN | TTCTTTATCATICT  |
| M0012 |             |          |      |     |                |                 |
| 8     | V\$GATA1_04 | 0.904718 | 2804 | (-) | NNCWGATARNNNN  | TTCTTTATCATTC   |
| M0007 |             |          |      |     |                |                 |
| 5     | V\$GATA1_01 | 0.785291 | 2806 | (-) | SNNGATNNNN     | CTTTATCATT      |

|       |             |          |      |     |                |                |
|-------|-------------|----------|------|-----|----------------|----------------|
| M0007 |             |          |      |     |                |                |
| 6     | V\$GATA2_01 | 0.808751 | 2806 | (-) | NNNGATRNNN     | CTTTATCATT     |
| M0007 |             |          |      |     |                |                |
| 7     | V\$GATA3_01 | 0.89012  | 2806 | (-) | NNGATARNG      | CTTTATCAT      |
| M0007 |             |          |      |     |                |                |
| 6     | V\$GATA2_01 | 0.80018  | 2891 | (+) | NNNGATRNNN     | CACCATACTC     |
| M0007 |             |          |      |     |                |                |
| 7     | V\$GATA3_01 | 0.82366  | 2903 | (+) | NNGATARNG      | AAGAGAGGA      |
| M0020 |             |          |      |     |                |                |
| 3     | V\$GATA_C   | 0.847779 | 2928 | (-) | NGATAAGNMNN    | AATTTTGTCA     |
| M0007 |             |          |      |     |                |                |
| 5     | V\$GATA1_01 | 0.779862 | 2979 | (+) | SNNGATNNNN     | ACAGATTAG      |
| M0007 |             |          |      |     |                |                |
| 7     | V\$GATA3_01 | 0.842268 | 2980 | (+) | NNGATARNG      | CAGATTAG       |
| M0007 |             |          |      |     |                |                |
| 5     | V\$GATA1_01 | 0.781836 | 3049 | (+) | SNNGATNNNN     | TGTGATCTTA     |
| M0007 |             |          |      |     |                |                |
| 6     | V\$GATA2_01 | 0.797023 | 3049 | (+) | NNNGATRNNN     | TGTGATCTTA     |
| M0007 |             |          |      |     |                |                |
| 6     | V\$GATA2_01 | 0.80424  | 3049 | (-) | NNNGATRNNN     | TGTGATCTTA     |
| M0012 |             |          |      |     |                |                |
| 7     | V\$GATA1_03 | 0.782215 | 3052 | (-) | RNSNNGATAANNGN | GATCTTATTATTAT |
| M0012 |             |          |      |     |                |                |
| 7     | V\$GATA1_03 | 0.784174 | 3055 | (-) | RNSNNGATAANNGN | CTTATTATTATTGT |
| M0007 |             |          |      |     |                |                |
| 5     | V\$GATA1_01 | 0.827246 | 3071 | (+) | SNNGATNNNN     | TTTGATTGCT     |
| M0007 |             |          |      |     |                |                |
| 6     | V\$GATA2_01 | 0.792512 | 3071 | (+) | NNNGATRNNN     | TTTGATTGCT     |
| M0007 |             |          |      |     |                |                |
| 5     | V\$GATA1_01 | 0.871175 | 3128 | (-) | SNNGATNNNN     | AAATATCCTC     |
| M0007 |             |          |      |     |                |                |
| 6     | V\$GATA2_01 | 0.92332  | 3128 | (-) | NNNGATRNNN     | AAATATCCTC     |
| M0007 |             |          |      |     |                |                |
| 5     | V\$GATA1_01 | 0.772458 | 3133 | (-) | SNNGATNNNN     | TCCTCTCAGG     |
| M0007 |             |          |      |     |                |                |
| 6     | V\$GATA2_01 | 0.793866 | 3173 | (-) | NNNGATRNNN     | GTCTATGTTC     |
| M0012 |             |          |      |     |                |                |
| 6     | V\$GATA1_02 | 0.822188 | 3216 | (-) | NNNNNGATANKGNN | TGGTGTATCGGTAA |
| M0007 |             |          |      |     |                |                |
| 5     | V\$GATA1_01 | 0.813425 | 3218 | (-) | SNNGATNNNN     | GTGTATCGGT     |
| M0007 |             |          |      |     |                |                |
| 6     | V\$GATA2_01 | 0.834461 | 3218 | (-) | NNNGATRNNN     | GTGTATCGGT     |
| M0012 |             |          |      |     |                |                |
| 6     | V\$GATA1_02 | 0.850938 | 3253 | (-) | NNNNNGATANKGNN | TCCCCTCTCTATAA |
| M0007 |             |          |      |     |                |                |
| 7     | V\$GATA3_01 | 0.834293 | 3255 | (-) | NNGATARNG      | CCCTCTCTA      |
| M0012 |             |          |      |     |                |                |
| 6     | V\$GATA1_02 | 0.813438 | 3290 | (-) | NNNNNGATANKGNN | TATAATATCTTCAG |
| M0007 |             |          |      |     |                |                |
| 5     | V\$GATA1_01 | 0.840079 | 3292 | (-) | SNNGATNNNN     | TAATATCTTC     |
| M0007 |             |          |      |     |                |                |
| 6     | V\$GATA2_01 | 0.879116 | 3292 | (-) | NNNGATRNNN     | TAATATCTTC     |
| M0007 |             |          |      |     |                |                |
| 7     | V\$GATA3_01 | 0.866637 | 3292 | (-) | NNGATARNG      | TAATATCTT      |
| M0007 |             |          |      |     |                |                |
| 5     | V\$GATA1_01 | 0.774926 | 3319 | (-) | SNNGATNNNN     | GAATATCGAT     |
| M0007 |             |          |      |     |                |                |
| 5     | V\$GATA1_01 | 0.852419 | 3323 | (-) | SNNGATNNNN     | ATCGATCTGC     |
| M0007 |             |          |      |     |                |                |
| 6     | V\$GATA2_01 | 0.848895 | 3323 | (-) | NNNGATRNNN     | ATCGATCTGC     |
| M0007 |             |          |      |     |                |                |
| 5     | V\$GATA1_01 | 0.866239 | 3340 | (-) | SNNGATNNNN     | AACCATCTTA     |
| M0007 |             |          |      |     |                |                |
| 6     | V\$GATA2_01 | 0.902571 | 3340 | (-) | NNNGATRNNN     | AACCATCTTA     |
| M0007 |             |          |      |     |                |                |
| 7     | V\$GATA3_01 | 0.841382 | 3340 | (-) | NNGATARNG      | AACCATCTT      |



|       |             |          |      |     |                |                |
|-------|-------------|----------|------|-----|----------------|----------------|
| M0007 |             |          |      |     |                |                |
| 6     | V\$GATA2_01 | 0.801985 | 3358 | (+) | NNNGATRNNN     | GCACATAGAC     |
| M0012 |             |          |      |     |                |                |
| 6     | V\$GATA1_02 | 0.789375 | 3418 | (+) | NNNNNGATANKGNN | TTAAGGATATGTTA |
| M0007 |             |          |      |     |                |                |
| 5     | V\$GATA1_01 | 0.818855 | 3420 | (+) | SNNGATNNNN     | AAGGATATGT     |
| M0007 |             |          |      |     |                |                |
| 6     | V\$GATA2_01 | 0.882724 | 3420 | (+) | NNNGATRNNN     | AAGGATATGT     |
| M0007 |             |          |      |     |                |                |
| 6     | V\$GATA2_01 | 0.801985 | 3422 | (-) | NNNGATRNNN     | GGATATGTTA     |
| M0012 |             |          |      |     |                |                |
| 7     | V\$GATA1_03 | 0.782215 | 3425 | (-) | RNSNNGATAANNGN | TATGTTAGCATGAT |
| M0007 |             |          |      |     |                |                |
| 5     | V\$GATA1_01 | 0.837611 | 3433 | (+) | SNNGATNNNN     | CATGATTTAT     |
| M0007 |             |          |      |     |                |                |
| 6     | V\$GATA2_01 | 0.787551 | 3433 | (+) | NNNGATRNNN     | CATGATTTAT     |
| M0012 |             |          |      |     |                |                |
| 7     | V\$GATA1_03 | 0.791769 | 3457 | (-) | RNSNNGATAANNGN | GCTTCTTTCTAGCT |
| M0007 |             |          |      |     |                |                |
| 5     | V\$GATA1_01 | 0.845015 | 3522 | (-) | SNNGATNNNN     | CTGAATCTTC     |
| M0007 |             |          |      |     |                |                |
| 6     | V\$GATA2_01 | 0.828597 | 3522 | (-) | NNNGATRNNN     | CTGAATCTTC     |
| M0007 |             |          |      |     |                |                |
| 7     | V\$GATA3_01 | 0.828977 | 3522 | (-) | NNGATARNG      | CTGAATCTT      |
| M0007 |             |          |      |     |                |                |
| 6     | V\$GATA2_01 | 0.819576 | 3625 | (+) | NNNGATRNNN     | CAGCATAGAG     |
| M0012 |             |          |      |     |                |                |
| 7     | V\$GATA1_03 | 0.794708 | 3654 | (-) | RNSNNGATAANNGN | CCAGCTATTCTCTC |
| M0012 |             |          |      |     |                |                |
| 7     | V\$GATA1_03 | 0.814307 | 3657 | (-) | RNSNNGATAANNGN | GCTATTCTCTCTTT |
| M0007 |             |          |      |     |                |                |
| 6     | V\$GATA2_01 | 0.798376 | 3670 | (+) | NNNGATRNNN     | TCAGTTAGCT     |
| M0007 |             |          |      |     |                |                |
| 6     | V\$GATA2_01 | 0.839874 | 3676 | (-) | NNNGATRNNN     | AGCTATGATG     |
| M0007 |             |          |      |     |                |                |
| 5     | V\$GATA1_01 | 0.821816 | 3679 | (+) | SNNGATNNNN     | TATGATGACT     |
| M0007 |             |          |      |     |                |                |
| 6     | V\$GATA2_01 | 0.858818 | 3679 | (+) | NNNGATRNNN     | TATGATGACT     |
| M0012 |             |          |      |     |                |                |
| 7     | V\$GATA1_03 | 0.822636 | 3708 | (-) | RNSNNGATAANNGN | TCATTTATTTTCCT |
| M0012 |             |          |      |     |                |                |
| 7     | V\$GATA1_03 | 0.782705 | 3724 | (-) | RNSNNGATAANNGN | AATTGTATCCAGGT |
| M0007 |             |          |      |     |                |                |
| 5     | V\$GATA1_01 | 0.785785 | 3726 | (-) | SNNGATNNNN     | TTGTATCCAG     |
| M0007 |             |          |      |     |                |                |
| 5     | V\$GATA1_01 | 0.783317 | 3790 | (-) | SNNGATNNNN     | TTCAATCCCT     |
| M0007 |             |          |      |     |                |                |
| 6     | V\$GATA2_01 | 0.786649 | 3790 | (-) | NNNGATRNNN     | TTCAATCCCT     |
| M0007 |             |          |      |     |                |                |
| 7     | V\$GATA3_01 | 0.84537  | 3790 | (-) | NNGATARNG      | TTCAATCCC      |
| M0012 |             |          |      |     |                |                |
| 6     | V\$GATA1_02 | 0.79     | 3807 | (+) | NNNNNGATANKGNN | CATTTGATAAGTAT |
| M0012 |             |          |      |     |                |                |
| 8     | V\$GATA1_04 | 0.906863 | 3808 | (+) | NNCWGATARNNNN  | ATTTGATAAGTAT  |
| M0007 |             |          |      |     |                |                |
| 5     | V\$GATA1_01 | 0.798124 | 3809 | (+) | SNNGATNNNN     | TTTGATAAGT     |
| M0007 |             |          |      |     |                |                |
| 6     | V\$GATA2_01 | 0.792963 | 3809 | (+) | NNNGATRNNN     | TTTGATAAGT     |
| M0007 |             |          |      |     |                |                |
| 7     | V\$GATA3_01 | 0.83961  | 3810 | (+) | NNGATARNG      | TTGATAAGT      |
| M0020 |             |          |      |     |                |                |
| 3     | V\$GATA_C   | 0.9242   | 3811 | (+) | NGATAAGNMNN    | TGATAAGTATG    |
| M0007 |             |          |      |     |                |                |
| 6     | V\$GATA2_01 | 0.797925 | 3815 | (-) | NNNGATRNNN     | AAGTATGTTA     |
| M0007 |             |          |      |     |                |                |
| 6     | V\$GATA2_01 | 0.783491 | 3856 | (-) | NNNGATRNNN     | AAATATGGTA     |

|       |             |          |      |     |                |                 |
|-------|-------------|----------|------|-----|----------------|-----------------|
| M0012 |             |          |      |     |                |                 |
| 6     | V\$GATA1_02 | 0.793125 | 4020 | (-) | NNNNNGATANKGNN | TTTAATATCTACAG  |
| M0012 |             |          |      |     |                |                 |
| 7     | V\$GATA1_03 | 0.787604 | 4020 | (-) | RNSNNGATAANNGN | TTTAATATCTACAG  |
| M0007 |             |          |      |     |                |                 |
| 5     | V\$GATA1_01 | 0.804047 | 4022 | (-) | SNNGATNNNN     | TAATATCTAC      |
| M0007 |             |          |      |     |                |                 |
| 6     | V\$GATA2_01 | 0.797474 | 4022 | (-) | NNNGATRNNN     | TAATATCTAC      |
| M0007 |             |          |      |     |                |                 |
| 7     | V\$GATA3_01 | 0.842268 | 4022 | (-) | NNGATARNG      | TAATATCTA       |
| M0007 |             |          |      |     |                |                 |
| 5     | V\$GATA1_01 | 0.80849  | 4051 | (+) | SNNGATNNNN     | AAAGATTCTT      |
| M0007 |             |          |      |     |                |                 |
| 6     | V\$GATA2_01 | 0.808751 | 4051 | (+) | NNNGATRNNN     | AAAGATTCTT      |
| M0020 |             |          |      |     |                |                 |
| 3     | V\$GATA_C   | 0.889407 | 4075 | (-) | NGATAAGNMNN    | AAGTGTATCC      |
| M0012 |             |          |      |     |                |                 |
| 7     | V\$GATA1_03 | 0.879716 | 4076 | (-) | RNSNNGATAANNGN | AGTGTATCCACTT   |
| M0007 |             |          |      |     |                |                 |
| 5     | V\$GATA1_01 | 0.781343 | 4078 | (-) | SNNGATNNNN     | TGTTATCCAC      |
| M0007 |             |          |      |     |                |                 |
| 6     | V\$GATA2_01 | 0.815968 | 4078 | (-) | NNNGATRNNN     | TGTTATCCAC      |
| M0012 |             |          |      |     |                |                 |
| 7     | V\$GATA1_03 | 0.828025 | 4084 | (-) | RNSNNGATAANNGN | CCACTTATTCTTCT  |
| M0007 |             |          |      |     |                |                 |
| 5     | V\$GATA1_01 | 0.836624 | 4119 | (-) | SNNGATNNNN     | AAAAATCAAC      |
| M0007 |             |          |      |     |                |                 |
| 6     | V\$GATA2_01 | 0.780785 | 4125 | (+) | NNNGATRNNN     | CAACATAATT      |
| M0007 |             |          |      |     |                |                 |
| 5     | V\$GATA1_01 | 0.801579 | 4213 | (-) | SNNGATNNNN     | TGAAATCAGA      |
| M0007 |             |          |      |     |                |                 |
| 6     | V\$GATA2_01 | 0.815968 | 4213 | (-) | NNNGATRNNN     | TGAAATCAGA      |
| M0012 |             |          |      |     |                |                 |
| 7     | V\$GATA1_03 | 0.805977 | 4216 | (+) | RNSNNGATAANNGN | AATCAGATAAAACAA |
| M0012 |             |          |      |     |                |                 |
| 8     | V\$GATA1_04 | 0.934743 | 4217 | (+) | NNCWGATARNNNN  | ATCAGATAAAACAA  |
| M0007 |             |          |      |     |                |                 |
| 6     | V\$GATA2_01 | 0.843933 | 4218 | (+) | NNNGATRNNN     | TCAGATAAAC      |
| M0007 |             |          |      |     |                |                 |
| 7     | V\$GATA3_01 | 0.840939 | 4219 | (+) | NNGATARNG      | CAGATAAAC       |
| M0020 |             |          |      |     |                |                 |
| 3     | V\$GATA_C   | 0.932588 | 4220 | (+) | NGATAAGNMNN    | AGATAAACAAA     |
| M0012 |             |          |      |     |                |                 |
| 6     | V\$GATA1_02 | 0.788125 | 4324 | (+) | NNNNNGATANKGNN | TTCATTATAATGGA  |
| M0020 |             |          |      |     |                |                 |
| 3     | V\$GATA_C   | 0.943771 | 4340 | (-) | NGATAAGNMNN    | GTTCTTTATCT     |
| M0012 |             |          |      |     |                |                 |
| 6     | V\$GATA1_02 | 0.863438 | 4341 | (-) | NNNNNGATANKGNN | TTCTTTATCTCTAG  |
| M0012 |             |          |      |     |                |                 |
| 7     | V\$GATA1_03 | 0.849339 | 4341 | (-) | RNSNNGATAANNGN | TTCTTTATCTCTAG  |
| M0012 |             |          |      |     |                |                 |
| 8     | V\$GATA1_04 | 0.904412 | 4341 | (-) | NNCWGATARNNNN  | TTCTTTATCTCTA   |
| M0007 |             |          |      |     |                |                 |
| 5     | V\$GATA1_01 | 0.793189 | 4343 | (-) | SNNGATNNNN     | CTTTATCTCT      |
| M0007 |             |          |      |     |                |                 |
| 6     | V\$GATA2_01 | 0.828146 | 4343 | (-) | NNNGATRNNN     | CTTTATCTCT      |
| M0007 |             |          |      |     |                |                 |
| 7     | V\$GATA3_01 | 0.930882 | 4343 | (-) | NNGATARNG      | CTTTATCTC       |
| M0012 |             |          |      |     |                |                 |
| 6     | V\$GATA1_02 | 0.859063 | 4349 | (+) | NNNNNGATANKGNN | CTCTAGATAATACC  |
| M0012 |             |          |      |     |                |                 |
| 7     | V\$GATA1_03 | 0.865507 | 4349 | (+) | RNSNNGATAANNGN | CTCTAGATAATACC  |
| M0012 |             |          |      |     |                |                 |
| 8     | V\$GATA1_04 | 0.851409 | 4350 | (+) | NNCWGATARNNNN  | TCTAGATAATACC   |
| M0007 |             |          |      |     |                |                 |
| 5     | V\$GATA1_01 | 0.790227 | 4351 | (+) | SNNGATNNNN     | CTAGATAATA      |

|       |             |          |      |     |                 |                |
|-------|-------------|----------|------|-----|-----------------|----------------|
| M0007 |             |          |      |     |                 |                |
| 7     | V\$GATA3_01 | 0.874169 | 4352 | (+) | NNGATARNG       | TAGATAATA      |
| M0020 |             |          |      |     |                 |                |
| 3     | V\$GATA_C   | 0.909289 | 4353 | (+) | NGATAAGNMNN     | AGATAATACCC    |
| M0012 |             |          |      |     |                 |                |
| 6     | V\$GATA1_02 | 0.77875  | 4361 | (-) | NNNNNGATANKGNN  | CCCACTATGTGTTG |
| M0007 |             |          |      |     |                 |                |
| 6     | V\$GATA2_01 | 0.811908 | 4363 | (-) | NNNGATRNNN      | CACTATGTGT     |
| M0020 |             |          |      |     |                 |                |
| 3     | V\$GATA_C   | 0.845915 | 4395 | (-) | NGATAAGNMNN     | CTGACTTGTC     |
| M0012 |             |          |      |     |                 |                |
| 6     | V\$GATA1_02 | 0.834688 | 4451 | (+) | NNNNNGATANKGNN  | TATTTGATAGGCAA |
| M0012 |             |          |      |     |                 |                |
| 8     | V\$GATA1_04 | 0.873162 | 4452 | (+) | NNCWGATARNNNN   | ATTTGATAGGCAA  |
| M0007 |             |          |      |     |                 |                |
| 5     | V\$GATA1_01 | 0.84847  | 4453 | (+) | SNNGATNNNN      | TTTGATAGGC     |
| M0007 |             |          |      |     |                 |                |
| 6     | V\$GATA2_01 | 0.840776 | 4453 | (+) | NNNGATRNNN      | TTTGATAGGC     |
| M0007 |             |          |      |     |                 |                |
| 7     | V\$GATA3_01 | 0.867966 | 4454 | (+) | NNGATARNG       | TTGATAGGC      |
| M0020 |             |          |      |     |                 |                |
| 3     | V\$GATA_C   | 0.90028  | 4455 | (+) | NGATAAGNMNN     | TGATAGGCAAC    |
| M0007 |             |          |      |     |                 |                |
| 5     | V\$GATA1_01 | 0.807996 | 4479 | (+) | SNNGATNNNN      | AATGATTTTT     |
| M0007 |             |          |      |     |                 |                |
| 6     | V\$GATA2_01 | 0.786198 | 4479 | (+) | NNNGATRNNN      | AATGATTTTT     |
| M0007 |             |          |      |     |                 |                |
| 6     | V\$GATA2_01 | 0.7871   | 4488 | (+) | NNNGATRNNN      | TAACATAACC     |
| M0007 |             |          |      |     |                 |                |
| 5     | V\$GATA1_01 | 0.773445 | 4513 | (-) | SNNGATNNNN      | AGGTTTCACC     |
| M0012 |             |          |      |     |                 |                |
| 7     | V\$GATA1_03 | 0.810632 | 4533 | (+) | RNSNNGATAANNNGN | AGACAGGTAAGAAA |
| M0020 |             |          |      |     |                 |                |
| 3     | V\$GATA_C   | 0.830693 | 4537 | (+) | NGATAAGNMNN     | AGGTAAGAAAT    |
| M0012 |             |          |      |     |                 |                |
| 8     | V\$GATA1_04 | 0.823836 | 4553 | (+) | NNCWGATARNNNN   | ACAAGATATACTG  |
| M0007 |             |          |      |     |                 |                |
| 5     | V\$GATA1_01 | 0.825765 | 4554 | (+) | SNNGATNNNN      | CAAGATATAC     |
| M0007 |             |          |      |     |                 |                |
| 6     | V\$GATA2_01 | 0.85972  | 4554 | (+) | NNNGATRNNN      | CAAGATATAC     |
| M0012 |             |          |      |     |                 |                |
| 7     | V\$GATA1_03 | 0.784174 | 4565 | (+) | RNSNNGATAANNNGN | GTAGAGTTAACAAA |
| M0012 |             |          |      |     |                 |                |
| 7     | V\$GATA1_03 | 0.800833 | 4590 | (-) | RNSNNGATAANNNGN | TTTGTCTCTCCAG  |
| M0007 |             |          |      |     |                 |                |
| 5     | V\$GATA1_01 | 0.774926 | 4614 | (+) | SNNGATNNNN      | GGTGTGTGTC     |
| M0012 |             |          |      |     |                 |                |
| 7     | V\$GATA1_03 | 0.824841 | 4644 | (+) | RNSNNGATAANNNGN | ATGGAAATAAACAC |
| M0012 |             |          |      |     |                 |                |
| 6     | V\$GATA1_02 | 0.8375   | 4669 | (+) | NNNNNGATANKGNN  | AACCAGATAGATGA |
| M0012 |             |          |      |     |                 |                |
| 7     | V\$GATA1_03 | 0.869672 | 4669 | (+) | RNSNNGATAANNNGN | AACCAGATAGATGA |
| M0012 |             |          |      |     |                 |                |
| 8     | V\$GATA1_04 | 0.918199 | 4670 | (+) | NNCWGATARNNNN   | ACCAGATAGATGA  |
| M0007 |             |          |      |     |                 |                |
| 5     | V\$GATA1_01 | 0.908193 | 4671 | (+) | SNNGATNNNN      | CCAGATAGAT     |
| M0007 |             |          |      |     |                 |                |
| 6     | V\$GATA2_01 | 0.907984 | 4671 | (+) | NNNGATRNNN      | CCAGATAGAT     |
| M0007 |             |          |      |     |                 |                |
| 7     | V\$GATA3_01 | 0.869296 | 4672 | (+) | NNGATARNG       | CAGATAGAT      |
| M0012 |             |          |      |     |                 |                |
| 7     | V\$GATA1_03 | 0.785644 | 4673 | (+) | RNSNNGATAANNNGN | AGATAGATGAGATC |
| M0020 |             |          |      |     |                 |                |
| 3     | V\$GATA_C   | 0.842187 | 4673 | (+) | NGATAAGNMNN     | AGATAGATGAG    |
| M0007 |             |          |      |     |                 |                |
| 7     | V\$GATA3_01 | 0.841382 | 4676 | (+) | NNGATARNG       | TAGATGAGA      |

|       |             |          |      |     |                |                |
|-------|-------------|----------|------|-----|----------------|----------------|
| M0007 |             |          |      |     |                |                |
| 5     | V\$GATA1_01 | 0.777887 | 4680 | (-) | SNNGATNNNN     | TGAGATCAAG     |
| M0007 |             |          |      |     |                |                |
| 6     | V\$GATA2_01 | 0.796121 | 4680 | (+) | NNNGATRNNN     | TGAGATCAAG     |
| M0012 |             |          |      |     |                |                |
| 6     | V\$GATA1_02 | 0.850937 | 4718 | (+) | NNNNNGATANKGNN | TGAAAGATAAGAAC |
| M0012 |             |          |      |     |                |                |
| 7     | V\$GATA1_03 | 0.840274 | 4718 | (+) | RNSNNGATAANNGN | TGAAAGATAAGAAC |
| M0012 |             |          |      |     |                |                |
| 8     | V\$GATA1_04 | 0.938113 | 4719 | (+) | NNCWGATARNNNN  | GAAAGATAAGAAC  |
| M0007 |             |          |      |     |                |                |
| 6     | V\$GATA2_01 | 0.823636 | 4720 | (+) | NNNGATRNNN     | AAAGATAAGA     |
| M0007 |             |          |      |     |                |                |
| 7     | V\$GATA3_01 | 0.919362 | 4721 | (+) | NNGATARNG      | AAGATAAGA      |
| M0020 |             |          |      |     |                |                |
| 3     | V\$GATA_C   | 0.982293 | 4722 | (+) | NGATAAGNMNN    | AGATAAGAACA    |
| M0012 |             |          |      |     |                |                |
| 6     | V\$GATA1_02 | 0.825625 | 4830 | (+) | NNNNNGATANKGNN | GAAATGATATAGCA |
| M0012 |             |          |      |     |                |                |
| 8     | V\$GATA1_04 | 0.854167 | 4831 | (+) | NNCWGATARNNNN  | AAATGATATAGCA  |
| M0007 |             |          |      |     |                |                |
| 5     | V\$GATA1_01 | 0.803554 | 4832 | (+) | SNNGATNNNN     | AATGATATAG     |
| M0007 |             |          |      |     |                |                |
| 6     | V\$GATA2_01 | 0.823636 | 4832 | (+) | NNNGATRNNN     | AATGATATAG     |
| M0007 |             |          |      |     |                |                |
| 7     | V\$GATA3_01 | 0.858219 | 4833 | (+) | NNGATARNG      | ATGATATAG      |
| M0020 |             |          |      |     |                |                |
| 3     | V\$GATA_C   | 0.870146 | 4834 | (+) | NGATAAGNMNN    | TGATATAGCAA    |
| M0007 |             |          |      |     |                |                |
| 6     | V\$GATA2_01 | 0.784393 | 4904 | (-) | NNNGATRNNN     | AGGTATGTTT     |
| M0007 |             |          |      |     |                |                |
| 6     | V\$GATA2_01 | 0.79567  | 4918 | (+) | NNNGATRNNN     | ATAGATATCC     |
| M0007 |             |          |      |     |                |                |
| 5     | V\$GATA1_01 | 0.770484 | 4920 | (-) | SNNGATNNNN     | AGATATCCAT     |
| M0007 |             |          |      |     |                |                |
| 6     | V\$GATA2_01 | 0.813712 | 4920 | (-) | NNNGATRNNN     | AGATATCCAT     |
| M0007 |             |          |      |     |                |                |
| 5     | V\$GATA1_01 | 0.774926 | 4983 | (-) | SNNGATNNNN     | GAACATCGAT     |
| M0012 |             |          |      |     |                |                |
| 7     | V\$GATA1_03 | 0.817001 | 4996 | (+) | RNSNNGATAANNGN | CTGAAGGTAAGGAC |
| M0012 |             |          |      |     |                |                |
| 8     | V\$GATA1_04 | 0.811275 | 4997 | (+) | NNCWGATARNNNN  | TGAAGGTAAGGAC  |
| M0020 |             |          |      |     |                |                |
| 3     | V\$GATA_C   | 0.840634 | 5000 | (+) | NGATAAGNMNN    | AGGTAAGGACC    |
| M0007 |             |          |      |     |                |                |
| 5     | V\$GATA1_01 | 0.827739 | 5007 | (-) | SNNGATNNNN     | GACCATCAAT     |
| M0012 |             |          |      |     |                |                |
| 6     | V\$GATA1_02 | 0.775625 | 5012 | (+) | NNNNNGATANKGNN | TCAATGATATTTAA |
| M0007 |             |          |      |     |                |                |
| 5     | V\$GATA1_01 | 0.831688 | 5014 | (+) | SNNGATNNNN     | AATGATATTT     |
| M0007 |             |          |      |     |                |                |
| 6     | V\$GATA2_01 | 0.850699 | 5014 | (+) | NNNGATRNNN     | AATGATATTT     |
| M0012 |             |          |      |     |                |                |
| 6     | V\$GATA1_02 | 0.862812 | 5144 | (+) | NNNNNGATANKGNN | CTTAAGATAATGTG |
| M0012 |             |          |      |     |                |                |
| 7     | V\$GATA1_03 | 0.798628 | 5144 | (+) | RNSNNGATAANNGN | CTTAAGATAATGTG |
| M0012 |             |          |      |     |                |                |
| 8     | V\$GATA1_04 | 0.877757 | 5145 | (+) | NNCWGATARNNNN  | TTAAGATAATGTG  |
| M0007 |             |          |      |     |                |                |
| 5     | V\$GATA1_01 | 0.812438 | 5146 | (+) | SNNGATNNNN     | TAAGATAATG     |
| M0007 |             |          |      |     |                |                |
| 6     | V\$GATA2_01 | 0.892648 | 5146 | (+) | NNNGATRNNN     | TAAGATAATG     |
| M0007 |             |          |      |     |                |                |
| 7     | V\$GATA3_01 | 0.93354  | 5147 | (+) | NNGATARNG      | AAGATAATG      |
| M0012 |             |          |      |     |                |                |
| 6     | V\$GATA1_02 | 0.809375 | 5179 | (+) | NNNNNGATANKGNN | GTAGAGAAAGTGTT |

|       |             |          |      |     |                |                |
|-------|-------------|----------|------|-----|----------------|----------------|
| M0020 |             |          |      |     |                |                |
| 3     | V\$GATA_C   | 0.860516 | 5208 | (-) | NGATAAGNMNN    | AATATTGTCT     |
| M0007 |             |          |      |     |                |                |
| 5     | V\$GATA1_01 | 0.859329 | 5254 | (+) | SNNGATNNNN     | GCTGATGAAT     |
| M0007 |             |          |      |     |                |                |
| 6     | V\$GATA2_01 | 0.822282 | 5254 | (+) | NNNGATRNNN     | GCTGATGAAT     |
| M0012 |             |          |      |     |                |                |
| 6     | V\$GATA1_02 | 0.80125  | 5314 | (+) | NNNNNGATANKGNN | GAAGAGACAGGGCC |
| M0020 |             |          |      |     |                |                |
| 3     | V\$GATA_C   | 0.871389 | 5318 | (+) | NGATAAGNMNN    | AGACAGGGCCT    |
| M0012 |             |          |      |     |                |                |
| 6     | V\$GATA1_02 | 0.781563 | 5371 | (+) | NNNNNGATANKGNN | TTATAGACAGTTGT |
| M0012 |             |          |      |     |                |                |
| 7     | V\$GATA1_03 | 0.828025 | 5377 | (-) | RNSNNGATAANNGN | ACAGTTGTCTGCAC |
| M0012 |             |          |      |     |                |                |
| 6     | V\$GATA1_02 | 0.807187 | 5390 | (-) | NNNNNGATANKGNN | CTTAGTATCAAAAC |
| M0007 |             |          |      |     |                |                |
| 5     | V\$GATA1_01 | 0.789733 | 5392 | (-) | SNNGATNNNN     | TAGTATCAAA     |
| M0007 |             |          |      |     |                |                |
| 6     | V\$GATA2_01 | 0.78304  | 5392 | (-) | NNNGATRNNN     | TAGTATCAAA     |
| M0012 |             |          |      |     |                |                |
| 6     | V\$GATA1_02 | 0.842812 | 5438 | (-) | NNNNNGATANKGNN | CAACGTATCTGCTC |
| M0012 |             |          |      |     |                |                |
| 7     | V\$GATA1_03 | 0.847379 | 5438 | (-) | RNSNNGATAANNGN | CAACGTATCTGCTC |
| M0012 |             |          |      |     |                |                |
| 8     | V\$GATA1_04 | 0.846507 | 5438 | (-) | NNCWGATARNNNN  | CAACGTATCTGCT  |
| M0007 |             |          |      |     |                |                |
| 5     | V\$GATA1_01 | 0.929911 | 5440 | (-) | SNNGATNNNN     | ACGTATCTGC     |
| M0007 |             |          |      |     |                |                |
| 6     | V\$GATA2_01 | 0.934596 | 5440 | (-) | NNNGATRNNN     | ACGTATCTGC     |
| M0007 |             |          |      |     |                |                |
| 7     | V\$GATA3_01 | 0.830749 | 5440 | (-) | NNGATARNG      | ACGTATCTG      |
| M0012 |             |          |      |     |                |                |
| 7     | V\$GATA1_03 | 0.800833 | 5473 | (-) | RNSNNGATAANNGN | GTTATTATCACTT  |
| M0007 |             |          |      |     |                |                |
| 5     | V\$GATA1_01 | 0.807996 | 5495 | (+) | SNNGATNNNN     | AATGATTTTT     |
| M0007 |             |          |      |     |                |                |
| 6     | V\$GATA2_01 | 0.786198 | 5495 | (+) | NNNGATRNNN     | AATGATTTTT     |
| M0007 |             |          |      |     |                |                |
| 5     | V\$GATA1_01 | 0.795656 | 5504 | (-) | SNNGATNNNN     | TTGGATCTGG     |
| M0007 |             |          |      |     |                |                |
| 6     | V\$GATA2_01 | 0.782138 | 5504 | (+) | NNNGATRNNN     | TTGGATCTGG     |
| M0007 |             |          |      |     |                |                |
| 6     | V\$GATA2_01 | 0.788453 | 5504 | (-) | NNNGATRNNN     | TTGGATCTGG     |
| M0007 |             |          |      |     |                |                |
| 5     | V\$GATA1_01 | 0.82231  | 5510 | (+) | SNNGATNNNN     | CTGGATTCTC     |
| M0007 |             |          |      |     |                |                |
| 5     | V\$GATA1_01 | 0.877098 | 5522 | (+) | SNNGATNNNN     | CCAGATTTTT     |
| M0007 |             |          |      |     |                |                |
| 6     | V\$GATA2_01 | 0.847091 | 5522 | (+) | NNNGATRNNN     | CCAGATTTTT     |
| M0007 |             |          |      |     |                |                |
| 5     | V\$GATA1_01 | 0.817374 | 5546 | (-) | SNNGATNNNN     | AGAGATCACA     |
| M0007 |             |          |      |     |                |                |
| 6     | V\$GATA2_01 | 0.845737 | 5546 | (-) | NNNGATRNNN     | AGAGATCACA     |
| M0007 |             |          |      |     |                |                |
| 5     | V\$GATA1_01 | 0.838105 | 5555 | (+) | SNNGATNNNN     | ACAGATGCTC     |
| M0007 |             |          |      |     |                |                |
| 6     | V\$GATA2_01 | 0.849346 | 5555 | (+) | NNNGATRNNN     | ACAGATGCTC     |
| M0012 |             |          |      |     |                |                |
| 6     | V\$GATA1_02 | 0.79125  | 5571 | (+) | NNNNNGATANKGNN | TGTGAGATAAAATA |
| M0012 |             |          |      |     |                |                |
| 8     | V\$GATA1_04 | 0.868873 | 5572 | (+) | NNCWGATARNNNN  | GTGAGATAAAATA  |
| M0007 |             |          |      |     |                |                |
| 6     | V\$GATA2_01 | 0.817772 | 5573 | (+) | NNNGATRNNN     | TGAGATAAAA     |
| M0007 |             |          |      |     |                |                |
| 7     | V\$GATA3_01 | 0.895879 | 5574 | (+) | NNGATARNG      | GAGATAAAA      |

|       |             |          |      |     |                |                |
|-------|-------------|----------|------|-----|----------------|----------------|
| M0020 |             |          |      |     |                |                |
| 3     | V\$GATA_C   | 0.903075 | 5575 | (+) | NGATAAGNMNN    | AGATAAAATAA    |
| M0012 |             |          |      |     |                |                |
| 6     | V\$GATA1_02 | 0.772813 | 5582 | (-) | NNNNNGATANKGNN | ATAAATATCTTTGT |
| M0007 |             |          |      |     |                |                |
| 5     | V\$GATA1_01 | 0.810958 | 5584 | (-) | SNNGATNNNN     | AAATATCTTT     |
| M0007 |             |          |      |     |                |                |
| 6     | V\$GATA2_01 | 0.861976 | 5584 | (-) | NNNGATRNNN     | AAATATCTTT     |
| M0007 |             |          |      |     |                |                |
| 7     | V\$GATA3_01 | 0.834736 | 5584 | (-) | NNGATARNG      | AAATATCTT      |
| M0007 |             |          |      |     |                |                |
| 5     | V\$GATA1_01 | 0.774926 | 5614 | (+) | SNNGATNNNN     | AATGATTATC     |
| M0020 |             |          |      |     |                |                |
| 3     | V\$GATA_C   | 0.889096 | 5614 | (-) | NGATAAGNMNN    | AATGATTATCT    |
| M0012 |             |          |      |     |                |                |
| 6     | V\$GATA1_02 | 0.856563 | 5615 | (-) | NNNNNGATANKGNN | ATGATTATCTTTGA |
| M0012 |             |          |      |     |                |                |
| 7     | V\$GATA1_03 | 0.798138 | 5615 | (-) | RNSNNGATAANNGN | ATGATTATCTTTGA |
| M0012 |             |          |      |     |                |                |
| 8     | V\$GATA1_04 | 0.813113 | 5615 | (-) | NNCWGATARNNNN  | ATGATTATCTTTG  |
| M0007 |             |          |      |     |                |                |
| 5     | V\$GATA1_01 | 0.777887 | 5617 | (-) | SNNGATNNNN     | GATTATCTTT     |
| M0007 |             |          |      |     |                |                |
| 6     | V\$GATA2_01 | 0.843482 | 5617 | (-) | NNNGATRNNN     | GATTATCTTT     |
| M0007 |             |          |      |     |                |                |
| 7     | V\$GATA3_01 | 0.866637 | 5617 | (-) | NNGATARNG      | GATTATCTT      |
| M0020 |             |          |      |     |                |                |
| 3     | V\$GATA_C   | 0.885989 | 5624 | (-) | NGATAAGNMNN    | TTTGATTATCT    |
| M0012 |             |          |      |     |                |                |
| 6     | V\$GATA1_02 | 0.867812 | 5625 | (-) | NNNNNGATANKGNN | TTGATTATCTTTTC |
| M0012 |             |          |      |     |                |                |
| 7     | V\$GATA1_03 | 0.881186 | 5625 | (-) | RNSNNGATAANNGN | TTGATTATCTTTTC |
| M0012 |             |          |      |     |                |                |
| 8     | V\$GATA1_04 | 0.875613 | 5625 | (-) | NNCWGATARNNNN  | TTGATTATCTTTT  |
| M0007 |             |          |      |     |                |                |
| 5     | V\$GATA1_01 | 0.777887 | 5627 | (-) | SNNGATNNNN     | GATTATCTTT     |
| M0007 |             |          |      |     |                |                |
| 6     | V\$GATA2_01 | 0.843482 | 5627 | (-) | NNNGATRNNN     | GATTATCTTT     |
| M0007 |             |          |      |     |                |                |
| 7     | V\$GATA3_01 | 0.866637 | 5627 | (-) | NNGATARNG      | GATTATCTT      |
| M0012 |             |          |      |     |                |                |
| 6     | V\$GATA1_02 | 0.770625 | 5630 | (-) | NNNNNGATANKGNN | TATCTTTTCTTGAC |
| M0012 |             |          |      |     |                |                |
| 6     | V\$GATA1_02 | 0.821875 | 5641 | (+) | NNNNNGATANKGNN | GACAGGATACTAGG |
| M0012 |             |          |      |     |                |                |
| 7     | V\$GATA1_03 | 0.868692 | 5641 | (+) | RNSNNGATAANNGN | GACAGGATACTAGG |
| M0007 |             |          |      |     |                |                |
| 5     | V\$GATA1_01 | 0.861303 | 5643 | (+) | SNNGATNNNN     | CAGGATACTA     |
| M0007 |             |          |      |     |                |                |
| 6     | V\$GATA2_01 | 0.899414 | 5643 | (+) | NNNGATRNNN     | CAGGATACTA     |
| M0007 |             |          |      |     |                |                |
| 5     | V\$GATA1_01 | 0.777394 | 5671 | (+) | SNNGATNNNN     | TAAGATTATT     |
| M0007 |             |          |      |     |                |                |
| 6     | V\$GATA2_01 | 0.815065 | 5671 | (+) | NNNGATRNNN     | TAAGATTATT     |
| M0007 |             |          |      |     |                |                |
| 7     | V\$GATA3_01 | 0.832964 | 5672 | (+) | NNGATARNG      | AAGATTATT      |
| M0012 |             |          |      |     |                |                |
| 6     | V\$GATA1_02 | 0.790625 | 5690 | (+) | NNNNNGATANKGNN | TTAAATATAAGGAA |
| M0020 |             |          |      |     |                |                |
| 3     | V\$GATA_C   | 0.831625 | 5694 | (+) | NGATAAGNMNN    | ATATAAGGAAA    |
| M0012 |             |          |      |     |                |                |
| 7     | V\$GATA1_03 | 0.791034 | 5696 | (+) | RNSNNGATAANNGN | ATAAGGAAAAGAAA |
| M0012 |             |          |      |     |                |                |
| 7     | V\$GATA1_03 | 0.786134 | 5777 | (+) | RNSNNGATAANNGN | AGACAGATATCTCT |
| M0012 |             |          |      |     |                |                |
| 8     | V\$GATA1_04 | 0.862745 | 5778 | (+) | NNCWGATARNNNN  | GACAGATATCTCT  |

|       |             |          |      |     |                |                 |
|-------|-------------|----------|------|-----|----------------|-----------------|
| M0007 |             |          |      |     |                |                 |
| 5     | V\$GATA1_01 | 0.831688 | 5779 | (+) | SNNGATNNNN     | ACAGATATCT      |
| M0007 |             |          |      |     |                |                 |
| 6     | V\$GATA2_01 | 0.889039 | 5779 | (+) | NNNGATRNNN     | ACAGATATCT      |
| M0012 |             |          |      |     |                |                 |
| 6     | V\$GATA1_02 | 0.81125  | 5779 | (-) | NNNNNGATANKGNN | ACAGATATCTCTAA  |
| M0012 |             |          |      |     |                |                 |
| 8     | V\$GATA1_04 | 0.835784 | 5779 | (-) | NNCWGATARNNNN  | ACAGATATCTCTA   |
| M0007 |             |          |      |     |                |                 |
| 5     | V\$GATA1_01 | 0.839585 | 5781 | (-) | SNNGATNNNN     | AGATATCTCT      |
| M0007 |             |          |      |     |                |                 |
| 6     | V\$GATA2_01 | 0.889039 | 5781 | (-) | NNNGATRNNN     | AGATATCTCT      |
| M0007 |             |          |      |     |                |                 |
| 7     | V\$GATA3_01 | 0.836066 | 5781 | (-) | NNGATARNG      | AGATATCTC       |
| M0007 |             |          |      |     |                |                 |
| 6     | V\$GATA2_01 | 0.835814 | 5811 | (+) | NNNGATRNNN     | CAGCATAGCA      |
| M0007 |             |          |      |     |                |                 |
| 5     | V\$GATA1_01 | 0.831194 | 5868 | (-) | SNNGATNNNN     | ATGGATCATG      |
| M0007 |             |          |      |     |                |                 |
| 6     | V\$GATA2_01 | 0.798827 | 5868 | (-) | NNNGATRNNN     | ATGGATCATG      |
| M0012 |             |          |      |     |                |                 |
| 7     | V\$GATA1_03 | 0.801568 | 5901 | (+) | RNSNNGATAANNGN | GTCATGAAAACCTGA |
| M0007 |             |          |      |     |                |                 |
| 5     | V\$GATA1_01 | 0.948667 | 5991 | (-) | SNNGATNNNN     | CCACATCACC      |
| M0007 |             |          |      |     |                |                 |
| 6     | V\$GATA2_01 | 0.896707 | 5991 | (-) | NNNGATRNNN     | CCACATCACC      |
| M0007 |             |          |      |     |                |                 |
| 7     | V\$GATA3_01 | 0.86265  | 5991 | (-) | NNGATARNG      | CCACATCAC       |
| M0012 |             |          |      |     |                |                 |
| 7     | V\$GATA1_03 | 0.805977 | 6066 | (+) | RNSNNGATAANNGN | AAGAAAATAAAGGT  |
| M0012 |             |          |      |     |                |                 |
| 7     | V\$GATA1_03 | 0.799363 | 6075 | (-) | RNSNNGATAANNGN | AAGGTTATTTACAT  |
| M0020 |             |          |      |     |                |                 |
| 3     | V\$GATA_C   | 0.937248 | 6088 | (-) | NGATAAGNMNN    | TTGATTTATCA     |
| M0012 |             |          |      |     |                |                 |
| 6     | V\$GATA1_02 | 0.799063 | 6089 | (-) | NNNNNGATANKGNN | TGATTTATCACAAC  |
| M0012 |             |          |      |     |                |                 |
| 8     | V\$GATA1_04 | 0.886336 | 6089 | (-) | NNCWGATARNNNN  | TGATTTATCACAA   |
| M0007 |             |          |      |     |                |                 |
| 5     | V\$GATA1_01 | 0.810958 | 6091 | (-) | SNNGATNNNN     | ATTTATCACA      |
| M0007 |             |          |      |     |                |                 |
| 6     | V\$GATA2_01 | 0.836265 | 6091 | (-) | NNNGATRNNN     | ATTTATCACA      |
| M0007 |             |          |      |     |                |                 |
| 7     | V\$GATA3_01 | 0.840496 | 6091 | (-) | NNGATARNG      | ATTTATCAC       |
| M0012 |             |          |      |     |                |                 |
| 8     | V\$GATA1_04 | 0.827819 | 6100 | (+) | NNCWGATARNNNN  | AACATATAAGAAT   |
| M0007 |             |          |      |     |                |                 |
| 5     | V\$GATA1_01 | 0.837117 | 6107 | (-) | SNNGATNNNN     | AAGAATCTAC      |
| M0012 |             |          |      |     |                |                 |
| 7     | V\$GATA1_03 | 0.844684 | 6140 | (+) | RNSNNGATAANNGN | ATGCAGATTAGTGA  |
| M0007 |             |          |      |     |                |                 |
| 5     | V\$GATA1_01 | 0.866732 | 6142 | (+) | SNNGATNNNN     | GCAGATTAGT      |
| M0007 |             |          |      |     |                |                 |
| 6     | V\$GATA2_01 | 0.843933 | 6142 | (+) | NNNGATRNNN     | GCAGATTAGT      |
| M0007 |             |          |      |     |                |                 |
| 7     | V\$GATA3_01 | 0.848028 | 6143 | (+) | NNGATARNG      | CAGATTAGT       |
| M0012 |             |          |      |     |                |                 |
| 7     | V\$GATA1_03 | 0.797893 | 6164 | (-) | RNSNNGATAANNGN | TTGGTTAGCCTGGT  |
| M0012 |             |          |      |     |                |                 |
| 7     | V\$GATA1_03 | 0.816512 | 6170 | (+) | RNSNNGATAANNGN | AGCCTGGTAGGCAG  |
| M0012 |             |          |      |     |                |                 |
| 7     | V\$GATA1_03 | 0.791034 | 6189 | (-) | RNSNNGATAANNGN | TTTGTTTTCTTAT   |
| M0020 |             |          |      |     |                |                 |
| 3     | V\$GATA_C   | 0.963964 | 6194 | (-) | NGATAAGNMNN    | TTTCCTTATCA     |
| M0012 |             |          |      |     |                |                 |
| 6     | V\$GATA1_02 | 0.882188 | 6195 | (-) | NNNNNGATANKGNN | TTCTTATCACTTG   |

|       |             |          |      |     |                |                |
|-------|-------------|----------|------|-----|----------------|----------------|
| M0012 |             |          |      |     |                |                |
| 7     | V\$GATA1_03 | 0.855218 | 6195 | (-) | RNSNNGATAANNGN | TTCCTTATCACTTG |
| M0012 |             |          |      |     |                |                |
| 8     | V\$GATA1_04 | 0.931373 | 6195 | (-) | NNCWGATARNNNN  | TTCCTTATCACTT  |
| M0007 |             |          |      |     |                |                |
| 5     | V\$GATA1_01 | 0.865745 | 6197 | (-) | SNNGATNNNN     | CCTTATCACT     |
| M0007 |             |          |      |     |                |                |
| 6     | V\$GATA2_01 | 0.863329 | 6197 | (-) | NNNGATRNNN     | CCTTATCACT     |
| M0007 |             |          |      |     |                |                |
| 7     | V\$GATA3_01 | 0.948161 | 6197 | (-) | NNGATARNG      | CCTTATCAC      |
| M0007 |             |          |      |     |                |                |
| 6     | V\$GATA2_01 | 0.80424  | 6265 | (-) | NNNGATRNNN     | TTACATCTGA     |
| M0020 |             |          |      |     |                |                |
| 3     | V\$GATA_C   | 0.935384 | 6274 | (-) | NGATAAGNMNN    | AATATTTATCA    |
| M0012 |             |          |      |     |                |                |
| 6     | V\$GATA1_02 | 0.774062 | 6275 | (-) | NNNNNGATANKGNN | ATATTTATCATAAA |
| M0012 |             |          |      |     |                |                |
| 8     | V\$GATA1_04 | 0.908088 | 6275 | (-) | NNCWGATARNNNN  | ATATTTATCATAA  |
| M0007 |             |          |      |     |                |                |
| 5     | V\$GATA1_01 | 0.78233  | 6277 | (-) | SNNGATNNNN     | ATTTATCATA     |
| M0007 |             |          |      |     |                |                |
| 6     | V\$GATA2_01 | 0.828146 | 6277 | (-) | NNNGATRNNN     | ATTTATCATA     |
| M0007 |             |          |      |     |                |                |
| 7     | V\$GATA3_01 | 0.823217 | 6277 | (-) | NNGATARNG      | ATTTATCAT      |
| M0012 |             |          |      |     |                |                |
| 6     | V\$GATA1_02 | 0.798437 | 6302 | (-) | NNNNNGATANKGNN | TCTCTTTTCTTTTC |
| M0012 |             |          |      |     |                |                |
| 7     | V\$GATA1_03 | 0.788339 | 6302 | (-) | RNSNNGATAANNGN | TCTCTTTTCTTTTC |
| M0012 |             |          |      |     |                |                |
| 7     | V\$GATA1_03 | 0.795688 | 6309 | (-) | RNSNNGATAANNGN | TCTTTTCTCAGGAT |
| M0007 |             |          |      |     |                |                |
| 5     | V\$GATA1_01 | 0.770484 | 6317 | (+) | SNNGATNNNN     | CAGGATCACA     |
| M0007 |             |          |      |     |                |                |
| 5     | V\$GATA1_01 | 0.849951 | 6317 | (-) | SNNGATNNNN     | CAGGATCACA     |
| M0007 |             |          |      |     |                |                |
| 6     | V\$GATA2_01 | 0.827695 | 6317 | (+) | NNNGATRNNN     | CAGGATCACA     |
| M0007 |             |          |      |     |                |                |
| 6     | V\$GATA2_01 | 0.85115  | 6317 | (-) | NNNGATRNNN     | CAGGATCACA     |
| M0007 |             |          |      |     |                |                |
| 5     | V\$GATA1_01 | 0.877591 | 6322 | (-) | SNNGATNNNN     | TCACATCATG     |
| M0007 |             |          |      |     |                |                |
| 6     | V\$GATA2_01 | 0.840325 | 6322 | (-) | NNNGATRNNN     | TCACATCATG     |
| M0020 |             |          |      |     |                |                |
| 3     | V\$GATA_C   | 0.849643 | 6342 | (+) | NGATAAGNMNN    | AGGTAAGACCT    |
| M0007 |             |          |      |     |                |                |
| 6     | V\$GATA2_01 | 0.790708 | 6388 | (-) | NNNGATRNNN     | TAGTATGTGC     |
| M0007 |             |          |      |     |                |                |
| 6     | V\$GATA2_01 | 0.818223 | 6397 | (-) | NNNGATRNNN     | CACTATGCTT     |
| M0020 |             |          |      |     |                |                |
| 3     | V\$GATA_C   | 0.898726 | 6406 | (-) | NGATAAGNMNN    | TTACTTTATCA    |
| M0012 |             |          |      |     |                |                |
| 6     | V\$GATA1_02 | 0.829063 | 6407 | (-) | NNNNNGATANKGNN | TACTTTATCAAAGC |
| M0007 |             |          |      |     |                |                |
| 7     | V\$GATA3_01 | 0.865751 | 6409 | (-) | NNGATARNG      | CTTTATCAA      |
| M0007 |             |          |      |     |                |                |
| 6     | V\$GATA2_01 | 0.804691 | 6418 | (-) | NNNGATRNNN     | AGCTGTCTTC     |
| M0007 |             |          |      |     |                |                |
| 5     | V\$GATA1_01 | 0.828233 | 6438 | (+) | SNNGATNNNN     | CAAGATTGAA     |
| M0007 |             |          |      |     |                |                |
| 6     | V\$GATA2_01 | 0.805593 | 6438 | (+) | NNNGATRNNN     | CAAGATTGAA     |
| M0007 |             |          |      |     |                |                |
| 7     | V\$GATA3_01 | 0.873283 | 6439 | (+) | NNGATARNG      | AAGATTGAA      |
| M0012 |             |          |      |     |                |                |
| 6     | V\$GATA1_02 | 0.842188 | 6490 | (+) | NNNNNGATANKGNN | TGCCAGATAAAGTT |
| M0012 |             |          |      |     |                |                |
| 7     | V\$GATA1_03 | 0.783439 | 6490 | (+) | RNSNNGATAANNGN | TGCCAGATAAAGTT |



|       |             |          |      |     |                |                |
|-------|-------------|----------|------|-----|----------------|----------------|
| M0012 |             |          |      |     |                |                |
| 8     | V\$GATA1_04 | 0.913909 | 6491 | (+) | NNCWGATARNNNN  | GCCAGATAAAGTT  |
| M0007 |             |          |      |     |                |                |
| 5     | V\$GATA1_01 | 0.854393 | 6492 | (+) | SNNGATNNNN     | CCAGATAAAG     |
| M0007 |             |          |      |     |                |                |
| 6     | V\$GATA2_01 | 0.869644 | 6492 | (+) | NNNGATRNNN     | CCAGATAAAG     |
| M0007 |             |          |      |     |                |                |
| 7     | V\$GATA3_01 | 0.907842 | 6493 | (+) | NNGATARNG      | CAGATAAAG      |
| M0020 |             |          |      |     |                |                |
| 3     | V\$GATA_C   | 0.907114 | 6494 | (+) | NGATAAGNMNN    | AGATAAAGTTA    |
| M0012 |             |          |      |     |                |                |
| 6     | V\$GATA1_02 | 0.833125 | 6530 | (+) | NNNNNGATANKGNN | TAAATGATAATCAG |
| M0012 |             |          |      |     |                |                |
| 7     | V\$GATA1_03 | 0.804508 | 6530 | (+) | RNSNNGATAANNGN | TAAATGATAATCAG |
| M0012 |             |          |      |     |                |                |
| 8     | V\$GATA1_04 | 0.883578 | 6531 | (+) | NNCWGATARNNNN  | AAATGATAATCAG  |
| M0007 |             |          |      |     |                |                |
| 5     | V\$GATA1_01 | 0.798618 | 6532 | (+) | SNNGATNNNN     | AATGATAATC     |
| M0007 |             |          |      |     |                |                |
| 6     | V\$GATA2_01 | 0.832206 | 6532 | (+) | NNNGATRNNN     | AATGATAATC     |
| M0007 |             |          |      |     |                |                |
| 7     | V\$GATA3_01 | 0.843155 | 6533 | (+) | NNGATARNG      | ATGATAATC      |
| M0007 |             |          |      |     |                |                |
| 5     | V\$GATA1_01 | 0.795656 | 6535 | (-) | SNNGATNNNN     | GATAATCAGT     |
| M0012 |             |          |      |     |                |                |
| 6     | V\$GATA1_02 | 0.79     | 6555 | (+) | NNNNNGATANKGNN | TCAGAGATTAGGTT |
| M0007 |             |          |      |     |                |                |
| 5     | V\$GATA1_01 | 0.821323 | 6557 | (+) | SNNGATNNNN     | AGAGATTAGG     |
| M0007 |             |          |      |     |                |                |
| 6     | V\$GATA2_01 | 0.810104 | 6557 | (+) | NNNGATRNNN     | AGAGATTAGG     |
| M0007 |             |          |      |     |                |                |
| 7     | V\$GATA3_01 | 0.937971 | 6558 | (+) | NNGATARNG      | GAGATTAGG      |
| M0020 |             |          |      |     |                |                |
| 3     | V\$GATA_C   | 0.891271 | 6565 | (-) | NGATAAGNMNN    | GGTCTTGTCT     |
| M0012 |             |          |      |     |                |                |
| 7     | V\$GATA1_03 | 0.817001 | 6566 | (-) | RNSNNGATAANNGN | GTTCTTGTCTCCTC |
| M0007 |             |          |      |     |                |                |
| 5     | V\$GATA1_01 | 0.798124 | 6593 | (+) | SNNGATNNNN     | AGAGATGAGA     |
| M0007 |             |          |      |     |                |                |
| 6     | V\$GATA2_01 | 0.803338 | 6593 | (+) | NNNGATRNNN     | AGAGATGAGA     |
| M0007 |             |          |      |     |                |                |
| 7     | V\$GATA3_01 | 0.883031 | 6594 | (+) | NNGATARNG      | GAGATGAGA      |
| M0007 |             |          |      |     |                |                |
| 5     | V\$GATA1_01 | 0.807996 | 6624 | (+) | SNNGATNNNN     | GAGGATTAT      |
| M0007 |             |          |      |     |                |                |
| 6     | V\$GATA2_01 | 0.818674 | 6624 | (+) | NNNGATRNNN     | GAGGATTAT      |
| M0012 |             |          |      |     |                |                |
| 6     | V\$GATA1_02 | 0.785    | 6638 | (+) | NNNNNGATANKGNN | GTATAGAAAGGACG |
| M0012 |             |          |      |     |                |                |
| 7     | V\$GATA1_03 | 0.820676 | 6657 | (+) | RNSNNGATAANNGN | AAGGGGAGAGCGGG |
| M0007 |             |          |      |     |                |                |
| 5     | V\$GATA1_01 | 0.785291 | 6659 | (+) | SNNGATNNNN     | GGGGAGAGCG     |
| M0007 |             |          |      |     |                |                |
| 6     | V\$GATA2_01 | 0.792512 | 6659 | (+) | NNNGATRNNN     | GGGGAGAGCG     |
| M0007 |             |          |      |     |                |                |
| 5     | V\$GATA1_01 | 0.781343 | 6671 | (-) | SNNGATNNNN     | CAGCCTCAGG     |
| M0007 |             |          |      |     |                |                |
| 5     | V\$GATA1_01 | 0.822804 | 6765 | (+) | SNNGATNNNN     | GGGGTTGGGG     |
| M0007 |             |          |      |     |                |                |
| 6     | V\$GATA2_01 | 0.799278 | 6765 | (+) | NNNGATRNNN     | GGGGTTGGGG     |
| M0007 |             |          |      |     |                |                |
| 5     | V\$GATA1_01 | 0.883021 | 6783 | (+) | SNNGATNNNN     | CCTGATTTTC     |
| M0007 |             |          |      |     |                |                |
| 6     | V\$GATA2_01 | 0.832206 | 6783 | (+) | NNNGATRNNN     | CCTGATTTTC     |
| M0012 |             |          |      |     |                |                |
| 7     | V\$GATA1_03 | 0.83317  | 6784 | (-) | RNSNNGATAANNGN | CTGATTTTCATCCC |

|       |             |          |      |     |                |                |
|-------|-------------|----------|------|-----|----------------|----------------|
| M0007 |             |          |      |     |                |                |
| 6     | V\$GATA2_01 | 0.803789 | 6789 | (-) | NNNGATRNNN     | TTTCATCCCA     |
| M0007 |             |          |      |     |                |                |
| 5     | V\$GATA1_01 | 0.789733 | 6803 | (-) | SNNGATNNNN     | CACCTTCCCG     |
| M0007 |             |          |      |     |                |                |
| 5     | V\$GATA1_01 | 0.815893 | 6821 | (+) | SNNGATNNNN     | AGAGATTTTT     |
| M0007 |             |          |      |     |                |                |
| 6     | V\$GATA2_01 | 0.805593 | 6821 | (+) | NNNGATRNNN     | AGAGATTTTT     |
| M0020 |             |          |      |     |                |                |
| 3     | V\$GATA_C   | 0.83877  | 6830 | (-) | NGATAAGNMNN    | TGTTCTTATTT    |
| M0007 |             |          |      |     |                |                |
| 7     | V\$GATA3_01 | 0.844927 | 6838 | (-) | NNGATARNG      | TTTAATCTT      |
| M0007 |             |          |      |     |                |                |
| 5     | V\$GATA1_01 | 0.828233 | 6874 | (+) | SNNGATNNNN     | TCTGATCCGC     |
| M0007 |             |          |      |     |                |                |
| 5     | V\$GATA1_01 | 0.799112 | 6874 | (-) | SNNGATNNNN     | TCTGATCCGC     |
| M0007 |             |          |      |     |                |                |
| 6     | V\$GATA2_01 | 0.840776 | 6874 | (+) | NNNGATRNNN     | TCTGATCCGC     |
| M0007 |             |          |      |     |                |                |
| 6     | V\$GATA2_01 | 0.828597 | 6874 | (-) | NNNGATRNNN     | TCTGATCCGC     |
| M0007 |             |          |      |     |                |                |
| 5     | V\$GATA1_01 | 0.783317 | 6881 | (+) | SNNGATNNNN     | CGCGAGGCTG     |
| M0007 |             |          |      |     |                |                |
| 5     | V\$GATA1_01 | 0.857848 | 6887 | (+) | SNNGATNNNN     | GCTGATTTTA     |
| M0007 |             |          |      |     |                |                |
| 6     | V\$GATA2_01 | 0.811457 | 6887 | (+) | NNNGATRNNN     | GCTGATTTTA     |
| M0007 |             |          |      |     |                |                |
| 6     | V\$GATA2_01 | 0.865133 | 6906 | (+) | NNNGATRNNN     | GAGCATAGTG     |
| M0007 |             |          |      |     |                |                |
| 5     | V\$GATA1_01 | 0.815893 | 6931 | (+) | SNNGATNNNN     | TTAGATGCTG     |
| M0007 |             |          |      |     |                |                |
| 6     | V\$GATA2_01 | 0.808751 | 6931 | (+) | NNNGATRNNN     | TTAGATGCTG     |
| M0007 |             |          |      |     |                |                |
| 5     | V\$GATA1_01 | 0.901777 | 6940 | (+) | SNNGATNNNN     | GGAGATTCCT     |
| M0007 |             |          |      |     |                |                |
| 6     | V\$GATA2_01 | 0.882724 | 6940 | (+) | NNNGATRNNN     | GGAGATTCCT     |
| M0012 |             |          |      |     |                |                |
| 6     | V\$GATA1_02 | 0.778125 | 6957 | (-) | NNNNNGATANKGNN | CCACCTTCTTTTC  |
| M0012 |             |          |      |     |                |                |
| 7     | V\$GATA1_03 | 0.817001 | 6962 | (-) | RNSNNGATAANNGN | TTTCTTTCTCTGCT |
| M0007 |             |          |      |     |                |                |
| 6     | V\$GATA2_01 | 0.788453 | 6978 | (+) | NNNGATRNNN     | CAGGACACCT     |
| M0012 |             |          |      |     |                |                |
| 7     | V\$GATA1_03 | 0.804508 | 6982 | (-) | RNSNNGATAANNGN | ACACCTGTCACCCC |
| M0007 |             |          |      |     |                |                |
| 5     | V\$GATA1_01 | 0.811451 | 6984 | (-) | SNNGATNNNN     | ACCTGTCACC     |
| M0007 |             |          |      |     |                |                |
| 6     | V\$GATA2_01 | 0.788904 | 6984 | (-) | NNNGATRNNN     | ACCTGTCACC     |
| M0020 |             |          |      |     |                |                |
| 3     | V\$GATA_C   | 0.960236 | 7006 | (-) | NGATAAGNMNN    | AATTCTTATCA    |
| M0012 |             |          |      |     |                |                |
| 6     | V\$GATA1_02 | 0.843438 | 7007 | (-) | NNNNNGATANKGNN | ATTCTTATCAGTCC |
| M0012 |             |          |      |     |                |                |
| 7     | V\$GATA1_03 | 0.897354 | 7007 | (-) | RNSNNGATAANNGN | ATTCTTATCAGTCC |
| M0012 |             |          |      |     |                |                |
| 8     | V\$GATA1_04 | 0.9519   | 7007 | (-) | NNCWGATARNNNN  | ATTCTTATCAGTC  |
| M0007 |             |          |      |     |                |                |
| 5     | V\$GATA1_01 | 0.810958 | 7009 | (-) | SNNGATNNNN     | TCTTATCAGT     |
| M0007 |             |          |      |     |                |                |
| 6     | V\$GATA2_01 | 0.820478 | 7009 | (-) | NNNGATRNNN     | TCTTATCAGT     |
| M0007 |             |          |      |     |                |                |
| 7     | V\$GATA3_01 | 0.89012  | 7009 | (-) | NNGATARNG      | TCTTATCAG      |
| M0012 |             |          |      |     |                |                |
| 7     | V\$GATA1_03 | 0.807692 | 7029 | (-) | RNSNNGATAANNGN | CTGCTTTTCTCTGT |
| M0012 |             |          |      |     |                |                |
| 7     | V\$GATA1_03 | 0.815287 | 7031 | (-) | RNSNNGATAANNGN | GCTTTTCTCTGTCT |

|       |             |          |      |     |                |                |
|-------|-------------|----------|------|-----|----------------|----------------|
| M0007 |             |          |      |     |                |                |
| 5     | V\$GATA1_01 | 0.840573 | 7067 | (+) | SNNGATNNNN     | CAAGATGTAT     |
| M0007 |             |          |      |     |                |                |
| 6     | V\$GATA2_01 | 0.834912 | 7067 | (+) | NNNGATRNNN     | CAAGATGTAT     |
| M0012 |             |          |      |     |                |                |
| 7     | V\$GATA1_03 | 0.796178 | 7086 | (-) | RNSNNGATAANNGN | CCATTAGCTGGTT  |
| M0012 |             |          |      |     |                |                |
| 6     | V\$GATA1_02 | 0.8225   | 7100 | (-) | NNNNNGATANKGNN | CCCCCTTTCTCTGC |
| M0012 |             |          |      |     |                |                |
| 7     | V\$GATA1_03 | 0.78099  | 7100 | (-) | RNSNNGATAANNGN | CCCCCTTTCTCTGC |
| M0007 |             |          |      |     |                |                |
| 7     | V\$GATA3_01 | 0.840496 | 7102 | (-) | NNGATARNG      | CCCTTTCTC      |
| M0012 |             |          |      |     |                |                |
| 7     | V\$GATA1_03 | 0.805488 | 7102 | (-) | RNSNNGATAANNGN | CCCTTTCTCTGCTC |
| M0012 |             |          |      |     |                |                |
| 8     | V\$GATA1_04 | 0.828431 | 7102 | (-) | NNCWGATARNNNN  | CCCTTTCTCTGCT  |
| M0007 |             |          |      |     |                |                |
| 5     | V\$GATA1_01 | 0.850938 | 7251 | (-) | SNNGATNNNN     | TGCCATCCAG     |
| M0007 |             |          |      |     |                |                |
| 6     | V\$GATA2_01 | 0.833559 | 7251 | (-) | NNNGATRNNN     | TGCCATCCAG     |
| M0007 |             |          |      |     |                |                |
| 6     | V\$GATA2_01 | 0.824538 | 7260 | (-) | NNNGATRNNN     | GGGTATGAGC     |
| M0007 |             |          |      |     |                |                |
| 6     | V\$GATA2_01 | 0.815516 | 7334 | (+) | NNNGATRNNN     | TAGGATCCAT     |
| M0007 |             |          |      |     |                |                |
| 7     | V\$GATA3_01 | 0.896323 | 7355 | (-) | NNGATARNG      | CCTAATCTA      |
| M0007 |             |          |      |     |                |                |
| 5     | V\$GATA1_01 | 0.88154  | 7365 | (+) | SNNGATNNNN     | AAAGATGGGG     |
| M0007 |             |          |      |     |                |                |
| 6     | V\$GATA2_01 | 0.88949  | 7365 | (+) | NNNGATRNNN     | AAAGATGGGG     |
| M0007 |             |          |      |     |                |                |
| 7     | V\$GATA3_01 | 0.929109 | 7366 | (+) | NNGATARNG      | AAGATGGGG      |
| M0007 |             |          |      |     |                |                |
| 5     | V\$GATA1_01 | 0.833169 | 7401 | (-) | SNNGATNNNN     | GTTAATCACG     |
| M0007 |             |          |      |     |                |                |
| 5     | V\$GATA1_01 | 0.781836 | 7418 | (+) | SNNGATNNNN     | AGAGATGAAT     |
| M0007 |             |          |      |     |                |                |
| 6     | V\$GATA2_01 | 0.786649 | 7418 | (+) | NNNGATRNNN     | AGAGATGAAT     |
| M0007 |             |          |      |     |                |                |
| 5     | V\$GATA1_01 | 0.794669 | 7446 | (-) | SNNGATNNNN     | ATCAATCTTT     |
| M0007 |             |          |      |     |                |                |
| 6     | V\$GATA2_01 | 0.793866 | 7446 | (-) | NNNGATRNNN     | ATCAATCTTT     |
| M0007 |             |          |      |     |                |                |
| 7     | V\$GATA3_01 | 0.841382 | 7446 | (-) | NNGATARNG      | ATCAATCTT      |
| M0007 |             |          |      |     |                |                |
| 6     | V\$GATA2_01 | 0.809202 | 7457 | (-) | NNNGATRNNN     | AAATATGTCC     |
| M0007 |             |          |      |     |                |                |
| 5     | V\$GATA1_01 | 0.827246 | 7500 | (-) | SNNGATNNNN     | AAACATCCGT     |
| M0007 |             |          |      |     |                |                |
| 6     | V\$GATA2_01 | 0.856112 | 7500 | (-) | NNNGATRNNN     | AAACATCCGT     |
| M0007 |             |          |      |     |                |                |
| 6     | V\$GATA2_01 | 0.824087 | 7540 | (+) | NNNGATRNNN     | AAGCATAGCT     |
| M0020 |             |          |      |     |                |                |
| 3     | V\$GATA_C   | 0.896241 | 7716 | (-) | NGATAAGNMNN    | CATTTTATCA     |
| M0012 |             |          |      |     |                |                |
| 6     | V\$GATA1_02 | 0.794375 | 7717 | (-) | NNNNNGATANKGNN | ATTTTATCACAAA  |
| M0012 |             |          |      |     |                |                |
| 8     | V\$GATA1_04 | 0.907475 | 7717 | (-) | NNCWGATARNNNN  | ATTTTATCACAA   |
| M0007 |             |          |      |     |                |                |
| 5     | V\$GATA1_01 | 0.77542  | 7719 | (-) | SNNGATNNNN     | TTTTATCACA     |
| M0007 |             |          |      |     |                |                |
| 6     | V\$GATA2_01 | 0.806495 | 7719 | (-) | NNNGATRNNN     | TTTTATCACA     |
| M0007 |             |          |      |     |                |                |
| 7     | V\$GATA3_01 | 0.872397 | 7719 | (-) | NNGATARNG      | TTTTATCAC      |
| M0007 |             |          |      |     |                |                |
| 5     | V\$GATA1_01 | 0.869694 | 7755 | (-) | SNNGATNNNN     | GTCAATCATG     |

|       |             |          |      |     |                |                |
|-------|-------------|----------|------|-----|----------------|----------------|
| M0007 |             |          |      |     |                |                |
| 6     | V\$GATA2_01 | 0.820478 | 7755 | (-) | NNNGATRNNN     | GTCAATCATG     |
| M0020 |             |          |      |     |                |                |
| 3     | V\$GATA_C   | 0.861758 | 7759 | (-) | NGATAAGNMNN    | ATCATGTATCT    |
| M0012 |             |          |      |     |                |                |
| 6     | V\$GATA1_02 | 0.820938 | 7760 | (-) | NNNNNGATANKGNN | TCATGTATCTGTGT |
| M0012 |             |          |      |     |                |                |
| 7     | V\$GATA1_03 | 0.828515 | 7760 | (-) | RNSNNGATAANNGN | TCATGTATCTGTGT |
| M0007 |             |          |      |     |                |                |
| 5     | V\$GATA1_01 | 0.813425 | 7762 | (-) | SNNGATNNNN     | ATGTATCTGT     |
| M0007 |             |          |      |     |                |                |
| 6     | V\$GATA2_01 | 0.841227 | 7762 | (-) | NNNGATRNNN     | ATGTATCTGT     |
| M0020 |             |          |      |     |                |                |
| 3     | V\$GATA_C   | 0.860826 | 7796 | (-) | NGATAAGNMNN    | TGAAGTTATCA    |
| M0012 |             |          |      |     |                |                |
| 7     | V\$GATA1_03 | 0.786379 | 7797 | (-) | RNSNNGATAANNGN | GAAGTTATCAGGGA |
| M0012 |             |          |      |     |                |                |
| 8     | V\$GATA1_04 | 0.816483 | 7797 | (-) | NNCWGATARNNNN  | GAAGTTATCAGGG  |
| M0007 |             |          |      |     |                |                |
| 5     | V\$GATA1_01 | 0.903258 | 7799 | (-) | SNNGATNNNN     | AGTTATCAGG     |
| M0007 |             |          |      |     |                |                |
| 6     | V\$GATA2_01 | 0.904375 | 7799 | (-) | NNNGATRNNN     | AGTTATCAGG     |
| M0007 |             |          |      |     |                |                |
| 7     | V\$GATA3_01 | 0.821444 | 7799 | (-) | NNGATARNG      | AGTTATCAG      |
| M0007 |             |          |      |     |                |                |
| 6     | V\$GATA2_01 | 0.79567  | 7831 | (+) | NNNGATRNNN     | CAACATATT      |
| M0012 |             |          |      |     |                |                |
| 7     | V\$GATA1_03 | 0.785154 | 7912 | (+) | RNSNNGATAANNGN | AAGGAGTTAGCACC |
| M0007 |             |          |      |     |                |                |
| 6     | V\$GATA2_01 | 0.78304  | 7914 | (+) | NNNGATRNNN     | GGAGTTAGCA     |
| M0012 |             |          |      |     |                |                |
| 7     | V\$GATA1_03 | 0.798873 | 7914 | (-) | RNSNNGATAANNGN | GGAGTTAGCACCCC |
| M0007 |             |          |      |     |                |                |
| 5     | V\$GATA1_01 | 0.773939 | 7941 | (+) | SNNGATNNNN     | GGGGCTAGTT     |
| M0007 |             |          |      |     |                |                |
| 5     | V\$GATA1_01 | 0.809477 | 7963 | (-) | SNNGATNNNN     | TAAAATCACA     |
| M0007 |             |          |      |     |                |                |
| 6     | V\$GATA2_01 | 0.797023 | 7963 | (-) | NNNGATRNNN     | TAAAATCACA     |
| M0007 |             |          |      |     |                |                |
| 7     | V\$GATA3_01 | 0.826761 | 7963 | (-) | NNGATARNG      | TAAAATCAC      |
| M0007 |             |          |      |     |                |                |
| 5     | V\$GATA1_01 | 0.818361 | 7971 | (+) | SNNGATNNNN     | CAGGATCAGT     |
| M0007 |             |          |      |     |                |                |
| 5     | V\$GATA1_01 | 0.833662 | 7971 | (-) | SNNGATNNNN     | CAGGATCAGT     |
| M0007 |             |          |      |     |                |                |
| 6     | V\$GATA2_01 | 0.844835 | 7971 | (+) | NNNGATRNNN     | CAGGATCAGT     |
| M0007 |             |          |      |     |                |                |
| 6     | V\$GATA2_01 | 0.818674 | 7971 | (-) | NNNGATRNNN     | CAGGATCAGT     |
| M0007 |             |          |      |     |                |                |
| 5     | V\$GATA1_01 | 0.813919 | 7984 | (+) | SNNGATNNNN     | ACTGATTTTC     |
| M0007 |             |          |      |     |                |                |
| 6     | V\$GATA2_01 | 0.790708 | 7984 | (+) | NNNGATRNNN     | ACTGATTTTC     |
| M0012 |             |          |      |     |                |                |
| 7     | V\$GATA1_03 | 0.800833 | 7985 | (-) | RNSNNGATAANNGN | CTGATTTTCTTTT  |
| M0007 |             |          |      |     |                |                |
| 5     | V\$GATA1_01 | 0.898322 | 8011 | (-) | SNNGATNNNN     | AGGAATCTGG     |
| M0007 |             |          |      |     |                |                |
| 6     | V\$GATA2_01 | 0.877312 | 8011 | (-) | NNNGATRNNN     | AGGAATCTGG     |
| M0020 |             |          |      |     |                |                |
| 3     | V\$GATA_C   | 0.894066 | 8056 | (-) | NGATAAGNMNN    | ATTCATTATCC    |
| M0012 |             |          |      |     |                |                |
| 6     | V\$GATA1_02 | 0.790938 | 8057 | (-) | NNNNNGATANKGNN | TTCATTATCCCAAT |
| M0012 |             |          |      |     |                |                |
| 7     | V\$GATA1_03 | 0.830475 | 8057 | (-) | RNSNNGATAANNGN | TTCATTATCCCAAT |
| M0012 |             |          |      |     |                |                |
| 8     | V\$GATA1_04 | 0.822304 | 8057 | (-) | NNCWGATARNNNN  | TTCATTATCCCAA  |

|       |             |          |      |     |                |                |
|-------|-------------|----------|------|-----|----------------|----------------|
| M0007 |             |          |      |     |                |                |
| 5     | V\$GATA1_01 | 0.836624 | 8059 | (-) | SNNGATNNNN     | CATTATCCCA     |
| M0007 |             |          |      |     |                |                |
| 6     | V\$GATA2_01 | 0.915201 | 8059 | (-) | NNNGATRNNN     | CATTATCCCA     |
| M0007 |             |          |      |     |                |                |
| 7     | V\$GATA3_01 | 0.905627 | 8059 | (-) | NNGATARNG      | CATTATCCC      |
| M0012 |             |          |      |     |                |                |
| 8     | V\$GATA1_04 | 0.816176 | 8063 | (-) | NNCWGATARNNNN  | ATCCCAATCAGAA  |
| M0007 |             |          |      |     |                |                |
| 5     | V\$GATA1_01 | 0.9077   | 8065 | (-) | SNNGATNNNN     | CCCAATCAGA     |
| M0007 |             |          |      |     |                |                |
| 6     | V\$GATA2_01 | 0.882724 | 8065 | (-) | NNNGATRNNN     | CCCAATCAGA     |
| M0007 |             |          |      |     |                |                |
| 7     | V\$GATA3_01 | 0.919805 | 8065 | (-) | NNGATARNG      | CCCAATCAG      |
| M0020 |             |          |      |     |                |                |
| 3     | V\$GATA_C   | 0.883504 | 8107 | (-) | NGATAAGNMNN    | TTACATATCC     |
| M0007 |             |          |      |     |                |                |
| 5     | V\$GATA1_01 | 0.827246 | 8110 | (-) | SNNGATNNNN     | ACATATCCTA     |
| M0007 |             |          |      |     |                |                |
| 6     | V\$GATA2_01 | 0.915201 | 8110 | (-) | NNNGATRNNN     | ACATATCCTA     |
| M0007 |             |          |      |     |                |                |
| 5     | V\$GATA1_01 | 0.84847  | 8125 | (+) | SNNGATNNNN     | TCTGATTGCA     |
| M0007 |             |          |      |     |                |                |
| 6     | V\$GATA2_01 | 0.852503 | 8125 | (+) | NNNGATRNNN     | TCTGATTGCA     |
| M0007 |             |          |      |     |                |                |
| 7     | V\$GATA3_01 | 0.848028 | 8126 | (+) | NNGATARNG      | CTGATTGCA      |
| M0007 |             |          |      |     |                |                |
| 6     | V\$GATA2_01 | 0.813261 | 8154 | (-) | NNNGATRNNN     | CACTGTCTC      |
| M0012 |             |          |      |     |                |                |
| 7     | V\$GATA1_03 | 0.784664 | 8174 | (+) | RNSNNGATAANNGN | ACATGGATATCAAC |
| M0007 |             |          |      |     |                |                |
| 6     | V\$GATA2_01 | 0.783942 | 8176 | (+) | NNNGATRNNN     | ATGGATATCA     |
| M0012 |             |          |      |     |                |                |
| 7     | V\$GATA1_03 | 0.817491 | 8176 | (-) | RNSNNGATAANNGN | ATGGATATCAACCC |
| M0007 |             |          |      |     |                |                |
| 5     | V\$GATA1_01 | 0.845508 | 8178 | (-) | SNNGATNNNN     | GGATATCAAC     |
| M0007 |             |          |      |     |                |                |
| 6     | V\$GATA2_01 | 0.831304 | 8178 | (-) | NNNGATRNNN     | GGATATCAAC     |
| M0007 |             |          |      |     |                |                |
| 5     | V\$GATA1_01 | 0.772458 | 8186 | (-) | SNNGATNNNN     | ACCCAACAGA     |
| M0007 |             |          |      |     |                |                |
| 5     | V\$GATA1_01 | 0.792201 | 8191 | (+) | SNNGATNNNN     | ACAGATGTAT     |
| M0007 |             |          |      |     |                |                |
| 6     | V\$GATA2_01 | 0.801534 | 8191 | (+) | NNNGATRNNN     | ACAGATGTAT     |
| M0020 |             |          |      |     |                |                |
| 3     | V\$GATA_C   | 0.849332 | 8208 | (-) | NGATAAGNMNN    | AATATTGTCA     |
| M0020 |             |          |      |     |                |                |
| 3     | V\$GATA_C   | 0.864865 | 8244 | (+) | NGATAAGNMNN    | GGACAAGCAAT    |
| M0007 |             |          |      |     |                |                |
| 5     | V\$GATA1_01 | 0.829714 | 8249 | (-) | SNNGATNNNN     | AGCAATCCTT     |
| M0007 |             |          |      |     |                |                |
| 6     | V\$GATA2_01 | 0.867388 | 8249 | (-) | NNNGATRNNN     | AGCAATCCTT     |
| M0012 |             |          |      |     |                |                |
| 6     | V\$GATA1_02 | 0.854688 | 8260 | (-) | NNNNNGATANKGNN | CTGACTATCTGTGC |
| M0012 |             |          |      |     |                |                |
| 7     | V\$GATA1_03 | 0.873836 | 8260 | (-) | RNSNNGATAANNGN | CTGACTATCTGTGC |
| M0012 |             |          |      |     |                |                |
| 8     | V\$GATA1_04 | 0.826593 | 8260 | (-) | NNCWGATARNNNN  | CTGACTATCTGTG  |
| M0007 |             |          |      |     |                |                |
| 5     | V\$GATA1_01 | 0.863771 | 8262 | (-) | SNNGATNNNN     | GA CTATCTGT    |
| M0007 |             |          |      |     |                |                |
| 6     | V\$GATA2_01 | 0.903022 | 8262 | (-) | NNNGATRNNN     | GA CTATCTGT    |
| M0007 |             |          |      |     |                |                |
| 7     | V\$GATA3_01 | 0.889233 | 8262 | (-) | NNGATARNG      | GA CTATCTG     |
| M0007 |             |          |      |     |                |                |
| 5     | V\$GATA1_01 | 0.88845  | 8312 | (+) | SNNGATNNNN     | CCAGATTTTG     |

|       |             |          |      |     |                 |                |
|-------|-------------|----------|------|-----|-----------------|----------------|
| M0007 |             |          |      |     |                 |                |
| 6     | V\$GATA2_01 | 0.860171 | 8312 | (+) | NNNGATRNNN      | CCAGATTTTG     |
| M0007 |             |          |      |     |                 |                |
| 7     | V\$GATA3_01 | 0.862206 | 8313 | (+) | NNGATARNG       | CAGATTTTG      |
| M0012 |             |          |      |     |                 |                |
| 6     | V\$GATA1_02 | 0.80625  | 8316 | (+) | NNNNNGATANKGNN  | ATTTTGATAGAACT |
| M0012 |             |          |      |     |                 |                |
| 8     | V\$GATA1_04 | 0.856924 | 8317 | (+) | NNCWGATARNNNN   | TTTTGATAGAACT  |
| M0007 |             |          |      |     |                 |                |
| 5     | V\$GATA1_01 | 0.775913 | 8318 | (+) | SNNGATNNNN      | TTTGATAGAA     |
| M0007 |             |          |      |     |                 |                |
| 7     | V\$GATA3_01 | 0.859105 | 8319 | (+) | NNGATARNG       | TTGATAGAA      |
| M0020 |             |          |      |     |                 |                |
| 3     | V\$GATA_C   | 0.890339 | 8320 | (+) | NGATAAGNMNN     | TGATAGAACTA    |
| M0007 |             |          |      |     |                 |                |
| 5     | V\$GATA1_01 | 0.828233 | 8328 | (-) | SNNGATNNNN      | CTAAATCTTG     |
| M0007 |             |          |      |     |                 |                |
| 6     | V\$GATA2_01 | 0.811908 | 8328 | (-) | NNNGATRNNN      | CTAAATCTTG     |
| M0007 |             |          |      |     |                 |                |
| 7     | V\$GATA3_01 | 0.848028 | 8328 | (-) | NNGATARNG       | CTAAATCTT      |
| M0020 |             |          |      |     |                 |                |
| 3     | V\$GATA_C   | 0.835353 | 8330 | (-) | NGATAAGNMNN     | AAATCTTGTC     |
| M0012 |             |          |      |     |                 |                |
| 7     | V\$GATA1_03 | 0.793974 | 8356 | (-) | RNSNNGATAANNNGN | ATGGCTATGTTTCT |
| M0007 |             |          |      |     |                 |                |
| 6     | V\$GATA2_01 | 0.806044 | 8358 | (-) | NNNGATRNNN      | GGCTATGTTT     |
| M0007 |             |          |      |     |                 |                |
| 5     | V\$GATA1_01 | 0.79615  | 8375 | (+) | SNNGATNNNN      | AATGATATCA     |
| M0007 |             |          |      |     |                 |                |
| 6     | V\$GATA2_01 | 0.839874 | 8375 | (+) | NNNGATRNNN      | AATGATATCA     |
| M0012 |             |          |      |     |                 |                |
| 7     | V\$GATA1_03 | 0.792504 | 8375 | (-) | RNSNNGATAANNNGN | AATGATATCAACAT |
| M0007 |             |          |      |     |                 |                |
| 7     | V\$GATA3_01 | 0.827204 | 8376 | (+) | NNGATARNG       | ATGATATCA      |
| M0007 |             |          |      |     |                 |                |
| 5     | V\$GATA1_01 | 0.824778 | 8377 | (-) | SNNGATNNNN      | TGATATCAAC     |
| M0007 |             |          |      |     |                 |                |
| 6     | V\$GATA2_01 | 0.805142 | 8377 | (-) | NNNGATRNNN      | TGATATCAAC     |
| M0020 |             |          |      |     |                 |                |
| 3     | V\$GATA_C   | 0.938801 | 8387 | (-) | NGATAAGNMNN     | ATGTTTTATCC    |
| M0012 |             |          |      |     |                 |                |
| 7     | V\$GATA1_03 | 0.814552 | 8388 | (-) | RNSNNGATAANNNGN | TGTTTTATCCTGTG |
| M0012 |             |          |      |     |                 |                |
| 8     | V\$GATA1_04 | 0.83701  | 8388 | (-) | NNCWGATARNNNN   | TGTTTTATCCTGT  |
| M0007 |             |          |      |     |                 |                |
| 5     | V\$GATA1_01 | 0.78233  | 8390 | (-) | SNNGATNNNN      | TTTTATCCTG     |
| M0007 |             |          |      |     |                 |                |
| 6     | V\$GATA2_01 | 0.833108 | 8390 | (-) | NNNGATRNNN      | TTTTATCCTG     |
| M0007 |             |          |      |     |                 |                |
| 7     | V\$GATA3_01 | 0.833407 | 8390 | (-) | NNGATARNG       | TTTTATCCT      |
| M0007 |             |          |      |     |                 |                |
| 5     | V\$GATA1_01 | 0.836624 | 8403 | (-) | SNNGATNNNN      | AGAAATCAAC     |
| M0007 |             |          |      |     |                 |                |
| 5     | V\$GATA1_01 | 0.816387 | 8422 | (-) | SNNGATNNNN      | GCTAATCAGA     |
| M0007 |             |          |      |     |                 |                |
| 6     | V\$GATA2_01 | 0.814614 | 8422 | (-) | NNNGATRNNN      | GCTAATCAGA     |
| M0007 |             |          |      |     |                 |                |
| 7     | V\$GATA3_01 | 0.824546 | 8422 | (-) | NNGATARNG       | GCTAATCAG      |
| M0007 |             |          |      |     |                 |                |
| 6     | V\$GATA2_01 | 0.812359 | 8435 | (-) | NNNGATRNNN      | TGGAATCCTT     |
| M0012 |             |          |      |     |                 |                |
| 7     | V\$GATA1_03 | 0.801813 | 8462 | (+) | RNSNNGATAANNNGN | AAGGAGAAAAAGAG |
| M0007 |             |          |      |     |                 |                |
| 6     | V\$GATA2_01 | 0.789806 | 8477 | (+) | NNNGATRNNN      | AGGCATAGGA     |
| M0012 |             |          |      |     |                 |                |
| 7     | V\$GATA1_03 | 0.795198 | 8552 | (-) | RNSNNGATAANNNGN | TCAGTTATGTGGAG |

|       |             |          |      |     |                |                |
|-------|-------------|----------|------|-----|----------------|----------------|
| M0007 |             |          |      |     |                |                |
| 6     | V\$GATA2_01 | 0.807848 | 8554 | (-) | NNNGATRNNN     | AGTTATGTGG     |
| M0007 |             |          |      |     |                |                |
| 5     | V\$GATA1_01 | 0.811945 | 8595 | (-) | SNNGATNNNN     | TCACATCCAC     |
| M0007 |             |          |      |     |                |                |
| 6     | V\$GATA2_01 | 0.789806 | 8595 | (-) | NNNGATRNNN     | TCACATCCAC     |
| M0012 |             |          |      |     |                |                |
| 6     | V\$GATA1_02 | 0.804688 | 8637 | (+) | NNNNNGATANKGNN | GCAGTGAGAAGGGA |
| M0007 |             |          |      |     |                |                |
| 7     | V\$GATA3_01 | 0.824103 | 8640 | (+) | NNGATARNG      | GTGAGAAGG      |
| M0007 |             |          |      |     |                |                |
| 5     | V\$GATA1_01 | 0.82231  | 8686 | (-) | SNNGATNNNN     | ATTCATCTTG     |
| M0007 |             |          |      |     |                |                |
| 6     | V\$GATA2_01 | 0.820027 | 8686 | (-) | NNNGATRNNN     | ATTCATCTTG     |
| M0012 |             |          |      |     |                |                |
| 7     | V\$GATA1_03 | 0.794463 | 8746 | (+) | RNSNNGATAANNGN | AGCAATATAGTCTC |
| M0012 |             |          |      |     |                |                |
| 8     | V\$GATA1_04 | 0.827819 | 8772 | (-) | NNCWGATARNNNN  | ATTCTTACCTGAA  |
| M0007 |             |          |      |     |                |                |
| 5     | V\$GATA1_01 | 0.800099 | 8806 | (-) | SNNGATNNNN     | AACTAACATG     |
| M0007 |             |          |      |     |                |                |
| 6     | V\$GATA2_01 | 0.783942 | 8809 | (+) | NNNGATRNNN     | TAACATGGCA     |
| M0007 |             |          |      |     |                |                |
| 6     | V\$GATA2_01 | 0.780785 | 8814 | (+) | NNNGATRNNN     | TGGCATGTTT     |
| M0012 |             |          |      |     |                |                |
| 8     | V\$GATA1_04 | 0.819853 | 8861 | (+) | NNCWGATARNNNN  | GTGAGATATATTT  |
| M0007 |             |          |      |     |                |                |
| 5     | V\$GATA1_01 | 0.80849  | 8862 | (+) | SNNGATNNNN     | TGAGATATAT     |
| M0007 |             |          |      |     |                |                |
| 6     | V\$GATA2_01 | 0.862427 | 8862 | (+) | NNNGATRNNN     | TGAGATATAT     |
| M0007 |             |          |      |     |                |                |
| 7     | V\$GATA3_01 | 0.832078 | 8863 | (+) | NNGATARNG      | GAGATATAT      |
| M0020 |             |          |      |     |                |                |
| 3     | V\$GATA_C   | 0.890339 | 8892 | (-) | NGATAAGNMNN    | TAGCATTATCC    |
| M0012 |             |          |      |     |                |                |
| 6     | V\$GATA1_02 | 0.837812 | 8893 | (-) | NNNNNGATANKGNN | AGCATTATCCAGGA |
| M0007 |             |          |      |     |                |                |
| 5     | V\$GATA1_01 | 0.832675 | 8895 | (-) | SNNGATNNNN     | CATTATCCAG     |
| M0007 |             |          |      |     |                |                |
| 6     | V\$GATA2_01 | 0.834461 | 8895 | (-) | NNNGATRNNN     | CATTATCCAG     |
| M0007 |             |          |      |     |                |                |
| 7     | V\$GATA3_01 | 0.863979 | 8895 | (-) | NNGATARNG      | CATTATCCA      |
| M0007 |             |          |      |     |                |                |
| 5     | V\$GATA1_01 | 0.887957 | 8902 | (+) | SNNGATNNNN     | CAGGATATGT     |
| M0007 |             |          |      |     |                |                |
| 6     | V\$GATA2_01 | 0.924222 | 8902 | (+) | NNNGATRNNN     | CAGGATATGT     |
| M0007 |             |          |      |     |                |                |
| 6     | V\$GATA2_01 | 0.801985 | 8904 | (-) | NNNGATRNNN     | GGATATGTTA     |
| M0020 |             |          |      |     |                |                |
| 3     | V\$GATA_C   | 0.844672 | 8904 | (+) | NGATAAGNMNN    | GGATATGTAA     |
| M0012 |             |          |      |     |                |                |
| 7     | V\$GATA1_03 | 0.851298 | 8968 | (+) | RNSNNGATAANNGN | AGGAAGATATGCCC |
| M0012 |             |          |      |     |                |                |
| 8     | V\$GATA1_04 | 0.871936 | 8969 | (+) | NNCWGATARNNNN  | GGAAGATATGCCC  |
| M0007 |             |          |      |     |                |                |
| 5     | V\$GATA1_01 | 0.873149 | 8970 | (+) | SNNGATNNNN     | GAAGATATGC     |
| M0007 |             |          |      |     |                |                |
| 6     | V\$GATA2_01 | 0.911592 | 8970 | (+) | NNNGATRNNN     | GAAGATATGC     |
| M0007 |             |          |      |     |                |                |
| 7     | V\$GATA3_01 | 0.85556  | 8971 | (+) | NNGATARNG      | AAGATATGC      |
| M0007 |             |          |      |     |                |                |
| 6     | V\$GATA2_01 | 0.84258  | 8972 | (-) | NNNGATRNNN     | AGATATGCCC     |
| M0020 |             |          |      |     |                |                |
| 3     | V\$GATA_C   | 0.911463 | 8972 | (+) | NGATAAGNMNN    | AGATATGCCCT    |
| M0012 |             |          |      |     |                |                |
| 6     | V\$GATA1_02 | 0.8625   | 8986 | (-) | NNNNNGATANKGNN | AACGCTATCTGGTA |

|       |             |          |      |     |                |                |
|-------|-------------|----------|------|-----|----------------|----------------|
| M0012 |             |          |      |     |                |                |
| 8     | V\$GATA1_04 | 0.898284 | 8986 | (-) | NNCWGATARNNNN  | AACGCTATCTGGT  |
| M0007 |             |          |      |     |                |                |
| 5     | V\$GATA1_01 | 0.959033 | 8988 | (-) | SNNGATNNNN     | CGCTATCTGG     |
| M0007 |             |          |      |     |                |                |
| 6     | V\$GATA2_01 | 0.980153 | 8988 | (-) | NNNGATRNNN     | CGCTATCTGG     |
| M0007 |             |          |      |     |                |                |
| 7     | V\$GATA3_01 | 0.940186 | 8988 | (-) | NNGATARNG      | CGCTATCTG      |
| M0020 |             |          |      |     |                |                |
| 3     | V\$GATA_C   | 0.885679 | 9011 | (-) | NGATAAGNMNN    | AAAGTTTATCA    |
| M0012 |             |          |      |     |                |                |
| 7     | V\$GATA1_03 | 0.784174 | 9025 | (+) | RNSNNGATAANNGN | GCAAAGGTAACAAG |
| M0012 |             |          |      |     |                |                |
| 7     | V\$GATA1_03 | 0.800343 | 9038 | (+) | RNSNNGATAANNGN | GGAATGAGAAGAAC |
| M0012 |             |          |      |     |                |                |
| 6     | V\$GATA1_02 | 0.812813 | 9055 | (+) | NNNNNGATANKGNN | GCACTGATAAATTA |
| M0012 |             |          |      |     |                |                |
| 7     | V\$GATA1_03 | 0.805243 | 9055 | (+) | RNSNNGATAANNGN | GCACTGATAAATTA |
| M0007 |             |          |      |     |                |                |
| 5     | V\$GATA1_01 | 0.794669 | 9057 | (+) | SNNGATNNNN     | ACTGATAAAT     |
| M0007 |             |          |      |     |                |                |
| 6     | V\$GATA2_01 | 0.803789 | 9057 | (+) | NNNGATRNNN     | ACTGATAAAT     |
| M0020 |             |          |      |     |                |                |
| 3     | V\$GATA_C   | 0.888475 | 9059 | (+) | NGATAAGNMNN    | TGATAAATTAC    |
| M0007 |             |          |      |     |                |                |
| 5     | V\$GATA1_01 | 0.844028 | 9122 | (+) | SNNGATNNNN     | CTAGATGTTT     |
| M0007 |             |          |      |     |                |                |
| 6     | V\$GATA2_01 | 0.793415 | 9122 | (+) | NNNGATRNNN     | CTAGATGTTT     |
| M0012 |             |          |      |     |                |                |
| 7     | V\$GATA1_03 | 0.781725 | 9130 | (-) | RNSNNGATAANNGN | TTACTGATCCCCTC |
| M0007 |             |          |      |     |                |                |
| 5     | V\$GATA1_01 | 0.807502 | 9132 | (+) | SNNGATNNNN     | ACTGATCCCC     |
| M0007 |             |          |      |     |                |                |
| 5     | V\$GATA1_01 | 0.842547 | 9132 | (-) | SNNGATNNNN     | ACTGATCCCC     |
| M0007 |             |          |      |     |                |                |
| 6     | V\$GATA2_01 | 0.820929 | 9132 | (+) | NNNGATRNNN     | ACTGATCCCC     |
| M0007 |             |          |      |     |                |                |
| 6     | V\$GATA2_01 | 0.858367 | 9132 | (-) | NNNGATRNNN     | ACTGATCCCC     |
| M0007 |             |          |      |     |                |                |
| 7     | V\$GATA3_01 | 0.830306 | 9168 | (-) | NNGATARNG      | TTAAATCTC      |
| M0007 |             |          |      |     |                |                |
| 6     | V\$GATA2_01 | 0.782589 | 9227 | (-) | NNNGATRNNN     | TTAGATCCGA     |
| M0012 |             |          |      |     |                |                |
| 7     | V\$GATA1_03 | 0.811857 | 9301 | (-) | RNSNNGATAANNGN | CCTTTTAGCAGCAC |
| M0007 |             |          |      |     |                |                |
| 5     | V\$GATA1_01 | 0.784798 | 9317 | (+) | SNNGATNNNN     | GGTGTTAGAT     |
| M0012 |             |          |      |     |                |                |
| 6     | V\$GATA1_02 | 0.815625 | 9319 | (+) | NNNNNGATANKGNN | TGTTAGATAGTTTA |
| M0007 |             |          |      |     |                |                |
| 5     | V\$GATA1_01 | 0.830207 | 9321 | (+) | SNNGATNNNN     | TTAGATAGTT     |
| M0007 |             |          |      |     |                |                |
| 6     | V\$GATA2_01 | 0.849346 | 9321 | (+) | NNNGATRNNN     | TTAGATAGTT     |
| M0007 |             |          |      |     |                |                |
| 7     | V\$GATA3_01 | 0.870625 | 9322 | (+) | NNGATARNG      | TAGATAGTT      |
| M0012 |             |          |      |     |                |                |
| 6     | V\$GATA1_02 | 0.844063 | 9449 | (-) | NNNNNGATANKGNN | GCTAGTATCAGAAA |
| M0012 |             |          |      |     |                |                |
| 8     | V\$GATA1_04 | 0.829963 | 9449 | (-) | NNCWGATARNNNN  | GCTAGTATCAGAA  |
| M0007 |             |          |      |     |                |                |
| 5     | V\$GATA1_01 | 0.846496 | 9451 | (-) | SNNGATNNNN     | TAGTATCAGA     |
| M0007 |             |          |      |     |                |                |
| 6     | V\$GATA2_01 | 0.872801 | 9451 | (-) | NNNGATRNNN     | TAGTATCAGA     |
| M0007 |             |          |      |     |                |                |
| 5     | V\$GATA1_01 | 0.831194 | 9463 | (+) | SNNGATNNNN     | CATGATCACT     |
| M0007 |             |          |      |     |                |                |
| 5     | V\$GATA1_01 | 0.802073 | 9463 | (-) | SNNGATNNNN     | CATGATCACT     |



|       |             |          |      |     |                 |                |
|-------|-------------|----------|------|-----|-----------------|----------------|
| M0007 |             |          |      |     |                 |                |
| 6     | V\$GATA2_01 | 0.831755 | 9463 | (+) | NNNGATRNNN      | CATGATCACT     |
| M0007 |             |          |      |     |                 |                |
| 6     | V\$GATA2_01 | 0.792512 | 9463 | (-) | NNNGATRNNN      | CATGATCACT     |
| M0007 |             |          |      |     |                 |                |
| 7     | V\$GATA3_01 | 0.835623 | 9482 | (-) | NNGATARNG       | CTTCATCTA      |
| M0007 |             |          |      |     |                 |                |
| 5     | V\$GATA1_01 | 0.801579 | 9495 | (+) | SNNGATNNNN      | TCTGATTTC      |
| M0007 |             |          |      |     |                 |                |
| 6     | V\$GATA2_01 | 0.815968 | 9495 | (+) | NNNGATRNNN      | TCTGATTTC      |
| M0007 |             |          |      |     |                 |                |
| 5     | V\$GATA1_01 | 0.772458 | 9516 | (-) | SNNGATNNNN      | TTAAATCCTC     |
| M0007 |             |          |      |     |                 |                |
| 6     | V\$GATA2_01 | 0.788904 | 9516 | (-) | NNNGATRNNN      | TTAAATCCTC     |
| M0007 |             |          |      |     |                 |                |
| 5     | V\$GATA1_01 | 0.857354 | 9540 | (-) | SNNGATNNNN      | AGTCATCTTC     |
| M0007 |             |          |      |     |                 |                |
| 6     | V\$GATA2_01 | 0.884529 | 9540 | (-) | NNNGATRNNN      | AGTCATCTTC     |
| M0007 |             |          |      |     |                 |                |
| 6     | V\$GATA2_01 | 0.783942 | 9578 | (+) | NNNGATRNNN      | CACCATAAGT     |
| M0012 |             |          |      |     |                 |                |
| 6     | V\$GATA1_02 | 0.79625  | 9596 | (-) | NNNNNGATANKGNN  | CTGAATATCATTA  |
| M0012 |             |          |      |     |                 |                |
| 8     | V\$GATA1_04 | 0.816176 | 9596 | (-) | NNCWGATARNNNN   | CTGAATATCATTA  |
| M0007 |             |          |      |     |                 |                |
| 5     | V\$GATA1_01 | 0.816881 | 9598 | (-) | SNNGATNNNN      | GAATATCATT     |
| M0007 |             |          |      |     |                 |                |
| 6     | V\$GATA2_01 | 0.847091 | 9598 | (-) | NNNGATRNNN      | GAATATCATT     |
| M0012 |             |          |      |     |                 |                |
| 8     | V\$GATA1_04 | 0.870711 | 9605 | (-) | NNCWGATARNNNN   | ATTAATATCTGAC  |
| M0007 |             |          |      |     |                 |                |
| 5     | V\$GATA1_01 | 0.804541 | 9607 | (-) | SNNGATNNNN      | TAATATCTGA     |
| M0007 |             |          |      |     |                 |                |
| 6     | V\$GATA2_01 | 0.872801 | 9607 | (-) | NNNGATRNNN      | TAATATCTGA     |
| M0007 |             |          |      |     |                 |                |
| 7     | V\$GATA3_01 | 0.860877 | 9607 | (-) | NNGATARNG       | TAATATCTG      |
| M0007 |             |          |      |     |                 |                |
| 7     | V\$GATA3_01 | 0.82942  | 9686 | (+) | NNGATARNG       | TAGATTAGT      |
| M0020 |             |          |      |     |                 |                |
| 3     | V\$GATA_C   | 0.845294 | 9687 | (+) | NGATAAGNMNN     | AGATTAGTCCA    |
| M0007 |             |          |      |     |                 |                |
| 6     | V\$GATA2_01 | 0.78304  | 9727 | (+) | NNNGATRNNN      | TGAGATTAAT     |
| M0007 |             |          |      |     |                 |                |
| 7     | V\$GATA3_01 | 0.830306 | 9728 | (+) | NNGATARNG       | GAGATTAAT      |
| M0012 |             |          |      |     |                 |                |
| 7     | V\$GATA1_03 | 0.793974 | 9742 | (-) | RNSNNGATAANNNGN | CTCATTCTCTACTC |
| M0020 |             |          |      |     |                 |                |
| 3     | V\$GATA_C   | 0.833178 | 9759 | (+) | NGATAAGNMNN     | AGAAAAGGCAC    |
| M0007 |             |          |      |     |                 |                |
| 5     | V\$GATA1_01 | 0.770977 | 9767 | (+) | SNNGATNNNN      | CACGTTAGGA     |
| M0007 |             |          |      |     |                 |                |
| 5     | V\$GATA1_01 | 0.7769   | 9772 | (+) | SNNGATNNNN      | TAGGATTCTA     |
| M0007 |             |          |      |     |                 |                |
| 6     | V\$GATA2_01 | 0.825891 | 9772 | (+) | NNNGATRNNN      | TAGGATTCTA     |
| M0007 |             |          |      |     |                 |                |
| 5     | V\$GATA1_01 | 0.843534 | 9802 | (+) | SNNGATNNNN      | TGGGATTGGA     |
| M0007 |             |          |      |     |                 |                |
| 6     | V\$GATA2_01 | 0.865584 | 9802 | (+) | NNNGATRNNN      | TGGGATTGGA     |
| M0007 |             |          |      |     |                 |                |
| 7     | V\$GATA3_01 | 0.886132 | 9803 | (+) | NNGATARNG       | GGGATTGGA      |
| M0012 |             |          |      |     |                 |                |
| 6     | V\$GATA1_02 | 0.773125 | 9815 | (-) | NNNNNGATANKGNN  | CATGGTATCTAAGC |
| M0007 |             |          |      |     |                 |                |
| 6     | V\$GATA2_01 | 0.813261 | 9817 | (-) | NNNGATRNNN      | TGGTATCTAA     |
| M0007 |             |          |      |     |                 |                |
| 5     | V\$GATA1_01 | 0.77542  | 9964 | (+) | SNNGATNNNN      | GGGGTTTGCT     |

|       |             |          |       |     |                |                |
|-------|-------------|----------|-------|-----|----------------|----------------|
| M0007 |             |          |       |     |                |                |
| 5     | V\$GATA1_01 | 0.806515 | 10011 | (+) | SNNGATNNNN     | CTTGATCATG     |
| M0007 |             |          |       |     |                |                |
| 5     | V\$GATA1_01 | 0.80306  | 10011 | (-) | SNNGATNNNN     | CTTGATCATG     |
| M0007 |             |          |       |     |                |                |
| 6     | V\$GATA2_01 | 0.785747 | 10011 | (-) | NNNGATRNNN     | CTTGATCATG     |
| M0007 |             |          |       |     |                |                |
| 6     | V\$GATA2_01 | 0.788002 | 10041 | (-) | NNNGATRNNN     | CCATATGCTT     |
| M0020 |             |          |       |     |                |                |
| 3     | V\$GATA_C   | 0.87698  | 10103 | (-) | NGATAAGNMNN    | GTGCTGTATCA    |
| M0012 |             |          |       |     |                |                |
| 6     | V\$GATA1_02 | 0.823437 | 10104 | (-) | NNNNNGATANKGNN | TGCTGTATCACATC |
| M0012 |             |          |       |     |                |                |
| 8     | V\$GATA1_04 | 0.826287 | 10104 | (-) | NNCWGATARNNNN  | TGCTGTATCACAT  |
| M0007 |             |          |       |     |                |                |
| 5     | V\$GATA1_01 | 0.861797 | 10106 | (-) | SNNGATNNNN     | CTGTATCACA     |
| M0007 |             |          |       |     |                |                |
| 6     | V\$GATA2_01 | 0.875507 | 10106 | (-) | NNNGATRNNN     | CTGTATCACA     |
| M0007 |             |          |       |     |                |                |
| 7     | V\$GATA3_01 | 0.856447 | 10106 | (-) | NNGATARNG      | CTGTATCAC      |
| M0020 |             |          |       |     |                |                |
| 3     | V\$GATA_C   | 0.841876 | 10121 | (-) | NGATAAGNMNN    | AATTACTATCC    |
| M0012 |             |          |       |     |                |                |
| 6     | V\$GATA1_02 | 0.799375 | 10122 | (-) | NNNNNGATANKGNN | ATTACTATCCAGAG |
| M0012 |             |          |       |     |                |                |
| 7     | V\$GATA1_03 | 0.841009 | 10122 | (-) | RNSNNGATAANNGN | ATTACTATCCAGAG |
| M0007 |             |          |       |     |                |                |
| 5     | V\$GATA1_01 | 0.850938 | 10124 | (-) | SNNGATNNNN     | TACTATCCAG     |
| M0007 |             |          |       |     |                |                |
| 6     | V\$GATA2_01 | 0.843031 | 10124 | (-) | NNNGATRNNN     | TACTATCCAG     |
| M0007 |             |          |       |     |                |                |
| 7     | V\$GATA3_01 | 0.857333 | 10124 | (-) | NNGATARNG      | TACTATCCA      |
| M0007 |             |          |       |     |                |                |
| 5     | V\$GATA1_01 | 0.775913 | 10158 | (-) | SNNGATNNNN     | CTACATCAAA     |
| M0007 |             |          |       |     |                |                |
| 5     | V\$GATA1_01 | 0.824284 | 10163 | (-) | SNNGATNNNN     | TCAAATCCTC     |
| M0007 |             |          |       |     |                |                |
| 6     | V\$GATA2_01 | 0.835363 | 10163 | (-) | NNNGATRNNN     | TCAAATCCTC     |
| M0007 |             |          |       |     |                |                |
| 5     | V\$GATA1_01 | 0.846989 | 10183 | (+) | SNNGATNNNN     | CCAGATGATA     |
| M0007 |             |          |       |     |                |                |
| 6     | V\$GATA2_01 | 0.838521 | 10183 | (+) | NNNGATRNNN     | CCAGATGATA     |
| M0007 |             |          |       |     |                |                |
| 7     | V\$GATA3_01 | 0.839167 | 10184 | (+) | NNGATARNG      | CAGATGATA      |
| M0007 |             |          |       |     |                |                |
| 5     | V\$GATA1_01 | 0.856861 | 10186 | (+) | SNNGATNNNN     | GATGATATAT     |
| M0007 |             |          |       |     |                |                |
| 6     | V\$GATA2_01 | 0.857465 | 10186 | (+) | NNNGATRNNN     | GATGATATAT     |
| M0020 |             |          |       |     |                |                |
| 3     | V\$GATA_C   | 0.899658 | 10204 | (-) | NGATAAGNMNN    | GGAATTTATCC    |
| M0012 |             |          |       |     |                |                |
| 7     | V\$GATA1_03 | 0.83758  | 10205 | (-) | RNSNNGATAANNGN | GAATTTATCCTGTC |
| M0012 |             |          |       |     |                |                |
| 8     | V\$GATA1_04 | 0.812194 | 10205 | (-) | NNCWGATARNNNN  | GAATTTATCCTGT  |
| M0007 |             |          |       |     |                |                |
| 5     | V\$GATA1_01 | 0.817868 | 10207 | (-) | SNNGATNNNN     | ATTIATCCTG     |
| M0007 |             |          |       |     |                |                |
| 6     | V\$GATA2_01 | 0.862878 | 10207 | (-) | NNNGATRNNN     | ATTIATCCTG     |
| M0012 |             |          |       |     |                |                |
| 6     | V\$GATA1_02 | 0.771875 | 10215 | (-) | NNNNNGATANKGNN | TGTCCTGTCTTTAT |
| M0012 |             |          |       |     |                |                |
| 7     | V\$GATA1_03 | 0.811122 | 10221 | (-) | RNSNNGATAANNGN | GTCTTTATTTCCC  |
| M0007 |             |          |       |     |                |                |
| 5     | V\$GATA1_01 | 0.897828 | 10245 | (+) | SNNGATNNNN     | CTGGATGGCG     |
| M0007 |             |          |       |     |                |                |
| 6     | V\$GATA2_01 | 0.87641  | 10245 | (+) | NNNGATRNNN     | CTGGATGGCG     |

|       |             |          |       |     |                 |                |
|-------|-------------|----------|-------|-----|-----------------|----------------|
| M0007 |             |          |       |     |                 |                |
| 7     | V\$GATA3_01 | 0.822774 | 10246 | (+) | NNGATARNG       | TGGATGGCG      |
| M0012 |             |          |       |     |                 |                |
| 6     | V\$GATA1_02 | 0.842187 | 10282 | (+) | NNNNNGATANKGNN  | GCACAGATATGCCA |
| M0012 |             |          |       |     |                 |                |
| 8     | V\$GATA1_04 | 0.812194 | 10283 | (+) | NNCWGATARNNNN   | CACAGATATGCCA  |
| M0007 |             |          |       |     |                 |                |
| 5     | V\$GATA1_01 | 0.82922  | 10284 | (+) | SNNGATNNNN      | ACAGATATGC     |
| M0007 |             |          |       |     |                 |                |
| 6     | V\$GATA2_01 | 0.872801 | 10284 | (+) | NNNGATRNNN      | ACAGATATGC     |
| M0007 |             |          |       |     |                 |                |
| 7     | V\$GATA3_01 | 0.849801 | 10285 | (+) | NNGATARNG       | CAGATATGC      |
| M0007 |             |          |       |     |                 |                |
| 6     | V\$GATA2_01 | 0.828146 | 10286 | (-) | NNNGATRNNN      | AGATATGCCA     |
| M0020 |             |          |       |     |                 |                |
| 3     | V\$GATA_C   | 0.891581 | 10286 | (+) | NGATAAGNMNN     | AGATATGCCAA    |
| M0007 |             |          |       |     |                 |                |
| 5     | V\$GATA1_01 | 0.919052 | 10335 | (-) | SNNGATNNNN      | AAGAATCAGG     |
| M0007 |             |          |       |     |                 |                |
| 6     | V\$GATA2_01 | 0.847091 | 10335 | (-) | NNNGATRNNN      | AAGAATCAGG     |
| M0020 |             |          |       |     |                 |                |
| 3     | V\$GATA_C   | 0.831625 | 10363 | (-) | NGATAAGNMNN     | TGCTTTTGTC     |
| M0007 |             |          |       |     |                 |                |
| 5     | V\$GATA1_01 | 0.858342 | 10387 | (-) | SNNGATNNNN      | AAGAATCAGA     |
| M0007 |             |          |       |     |                 |                |
| 6     | V\$GATA2_01 | 0.838069 | 10387 | (-) | NNNGATRNNN      | AAGAATCAGA     |
| M0007 |             |          |       |     |                 |                |
| 5     | V\$GATA1_01 | 0.778875 | 10399 | (+) | SNNGATNNNN      | GTTGATTAAT     |
| M0020 |             |          |       |     |                 |                |
| 3     | V\$GATA_C   | 0.912706 | 10405 | (-) | NGATAAGNMNN     | TAATCTTATCC    |
| M0012 |             |          |       |     |                 |                |
| 6     | V\$GATA1_02 | 0.825625 | 10406 | (-) | NNNNNGATANKGNN  | AATCTTATCCCGGA |
| M0007 |             |          |       |     |                 |                |
| 5     | V\$GATA1_01 | 0.862784 | 10408 | (-) | SNNGATNNNN      | TCTTATCCCG     |
| M0007 |             |          |       |     |                 |                |
| 6     | V\$GATA2_01 | 0.887686 | 10408 | (-) | NNNGATRNNN      | TCTTATCCCG     |
| M0007 |             |          |       |     |                 |                |
| 7     | V\$GATA3_01 | 0.891449 | 10408 | (-) | NNGATARNG       | TCTTATCCC      |
| M0020 |             |          |       |     |                 |                |
| 3     | V\$GATA_C   | 0.845604 | 10425 | (-) | NGATAAGNMNN     | TGTCCTTATGT    |
| M0012 |             |          |       |     |                 |                |
| 7     | V\$GATA1_03 | 0.797893 | 10449 | (-) | RNSNNGATAANNNGN | ATAGTTATTCTCAC |
| M0007 |             |          |       |     |                 |                |
| 5     | V\$GATA1_01 | 0.852419 | 10459 | (-) | SNNGATNNNN      | TCACATCCTG     |
| M0007 |             |          |       |     |                 |                |
| 6     | V\$GATA2_01 | 0.866035 | 10459 | (-) | NNNGATRNNN      | TCACATCCTG     |
| M0007 |             |          |       |     |                 |                |
| 5     | V\$GATA1_01 | 0.777394 | 10468 | (+) | SNNGATNNNN      | GGTGTTATTT     |
| M0007 |             |          |       |     |                 |                |
| 5     | V\$GATA1_01 | 0.898815 | 10491 | (-) | SNNGATNNNN      | AGCAATCTTC     |
| M0007 |             |          |       |     |                 |                |
| 6     | V\$GATA2_01 | 0.899865 | 10491 | (-) | NNNGATRNNN      | AGCAATCTTC     |
| M0007 |             |          |       |     |                 |                |
| 7     | V\$GATA3_01 | 0.84537  | 10491 | (-) | NNGATARNG       | AGCAATCTT      |
| M0012 |             |          |       |     |                 |                |
| 6     | V\$GATA1_02 | 0.789062 | 10504 | (-) | NNNNNGATANKGNN  | TCAGTTATCCCTTC |
| M0012 |             |          |       |     |                 |                |
| 7     | V\$GATA1_03 | 0.882411 | 10504 | (-) | RNSNNGATAANNNGN | TCAGTTATCCCTTC |
| M0012 |             |          |       |     |                 |                |
| 8     | V\$GATA1_04 | 0.820159 | 10504 | (-) | NNCWGATARNNNN   | TCAGTTATCCCTT  |
| M0007 |             |          |       |     |                 |                |
| 5     | V\$GATA1_01 | 0.816881 | 10506 | (-) | SNNGATNNNN      | AGTTATCCCT     |
| M0007 |             |          |       |     |                 |                |
| 6     | V\$GATA2_01 | 0.888588 | 10506 | (-) | NNNGATRNNN      | AGTTATCCCT     |
| M0007 |             |          |       |     |                 |                |
| 7     | V\$GATA3_01 | 0.822774 | 10506 | (-) | NNGATARNG       | AGTTATCCC      |

|       |             |          |       |     |                |                |
|-------|-------------|----------|-------|-----|----------------|----------------|
| M0012 |             |          |       |     |                |                |
| 8     | V\$GATA1_04 | 0.82598  | 10512 | (-) | NNCWGATARNNNN  | CCCTTCATCTGGT  |
| M0007 |             |          |       |     |                |                |
| 5     | V\$GATA1_01 | 0.854393 | 10514 | (-) | SNNGATNNNN     | CTTCATCTGG     |
| M0007 |             |          |       |     |                |                |
| 6     | V\$GATA2_01 | 0.841227 | 10514 | (-) | NNNGATRNNN     | CTTCATCTGG     |
| M0007 |             |          |       |     |                |                |
| 7     | V\$GATA3_01 | 0.854231 | 10514 | (-) | NNGATARNG      | CTTCATCTG      |
| M0012 |             |          |       |     |                |                |
| 7     | V\$GATA1_03 | 0.804018 | 10559 | (-) | RNSNNGATAANNGN | TCTCCTAACCCAC  |
| M0007 |             |          |       |     |                |                |
| 5     | V\$GATA1_01 | 0.775913 | 10561 | (-) | SNNGATNNNN     | TCCTAACCCC     |
| M0007 |             |          |       |     |                |                |
| 6     | V\$GATA2_01 | 0.784844 | 10561 | (-) | NNNGATRNNN     | TCCTAACCCC     |
| M0007 |             |          |       |     |                |                |
| 5     | V\$GATA1_01 | 0.773939 | 10568 | (-) | SNNGATNNNN     | CCCACTCCCC     |
| M0012 |             |          |       |     |                |                |
| 6     | V\$GATA1_02 | 0.789375 | 10575 | (-) | NNNNNGATANKGNN | CCCAGTCTCTGTAA |
| M0007 |             |          |       |     |                |                |
| 6     | V\$GATA2_01 | 0.794317 | 10599 | (-) | NNNGATRNNN     | GCCCATGAGA     |
| M0007 |             |          |       |     |                |                |
| 5     | V\$GATA1_01 | 0.771471 | 10632 | (-) | SNNGATNNNN     | TTTCATCAAG     |
| M0007 |             |          |       |     |                |                |
| 6     | V\$GATA2_01 | 0.820929 | 10653 | (-) | NNNGATRNNN     | AACTATGATG     |
| M0007 |             |          |       |     |                |                |
| 5     | V\$GATA1_01 | 0.804541 | 10656 | (+) | SNNGATNNNN     | TATGATGTCA     |
| M0007 |             |          |       |     |                |                |
| 6     | V\$GATA2_01 | 0.843933 | 10656 | (+) | NNNGATRNNN     | TATGATGTCA     |
| M0007 |             |          |       |     |                |                |
| 5     | V\$GATA1_01 | 0.863771 | 10680 | (+) | SNNGATNNNN     | ACTGATGGTA     |
| M0007 |             |          |       |     |                |                |
| 6     | V\$GATA2_01 | 0.837167 | 10680 | (+) | NNNGATRNNN     | ACTGATGGTA     |
| M0007 |             |          |       |     |                |                |
| 7     | V\$GATA3_01 | 0.844041 | 10681 | (+) | NNGATARNG      | CTGATGGTA      |
| M0020 |             |          |       |     |                |                |
| 3     | V\$GATA_C   | 0.835974 | 10701 | (-) | NGATAAGNMNN    | AAAATGTATCA    |
| M0012 |             |          |       |     |                |                |
| 6     | V\$GATA1_02 | 0.809063 | 10702 | (-) | NNNNNGATANKGNN | AAATGTATCAATTA |
| M0007 |             |          |       |     |                |                |
| 5     | V\$GATA1_01 | 0.777394 | 10704 | (-) | SNNGATNNNN     | ATGTATCAAT     |
| M0007 |             |          |       |     |                |                |
| 5     | V\$GATA1_01 | 0.773939 | 10741 | (+) | SNNGATNNNN     | TTTGATCCTT     |
| M0012 |             |          |       |     |                |                |
| 7     | V\$GATA1_03 | 0.808427 | 10895 | (+) | RNSNNGATAANNGN | AGGAAGAGAGAAGT |
| M0020 |             |          |       |     |                |                |
| 3     | V\$GATA_C   | 0.832867 | 10901 | (+) | NGATAAGNMNN    | AGAGAAGTCAA    |
| M0007 |             |          |       |     |                |                |
| 5     | V\$GATA1_01 | 0.773939 | 10910 | (+) | SNNGATNNNN     | AATGATGAAT     |
| M0012 |             |          |       |     |                |                |
| 6     | V\$GATA1_02 | 0.800312 | 10991 | (-) | NNNNNGATANKGNN | AAATATATCTGTAC |
| M0012 |             |          |       |     |                |                |
| 8     | V\$GATA1_04 | 0.835478 | 10991 | (-) | NNCWGATARNNNN  | AAATATATCTGTA  |
| M0007 |             |          |       |     |                |                |
| 5     | V\$GATA1_01 | 0.792201 | 10993 | (-) | SNNGATNNNN     | ATATATCTGT     |
| M0007 |             |          |       |     |                |                |
| 6     | V\$GATA2_01 | 0.82995  | 10993 | (-) | NNNGATRNNN     | ATATATCTGT     |
| M0007 |             |          |       |     |                |                |
| 5     | V\$GATA1_01 | 0.773939 | 11014 | (-) | SNNGATNNNN     | ATTTCATCATT    |
| M0020 |             |          |       |     |                |                |
| 3     | V\$GATA_C   | 0.830693 | 11021 | (-) | NGATAAGNMNN    | ATTCTGATCT     |
| M0012 |             |          |       |     |                |                |
| 6     | V\$GATA1_02 | 0.783438 | 11060 | (-) | NNNNNGATANKGNN | TACCTTAGCTGTGA |
| M0007 |             |          |       |     |                |                |
| 5     | V\$GATA1_01 | 0.866732 | 11069 | (+) | SNNGATNNNN     | TGTGATGCGA     |
| M0007 |             |          |       |     |                |                |
| 6     | V\$GATA2_01 | 0.850699 | 11069 | (+) | NNNGATRNNN     | TGTGATGCGA     |

|       |             |          |       |     |                      |                     |
|-------|-------------|----------|-------|-----|----------------------|---------------------|
| M0007 |             |          |       |     |                      |                     |
| 5     | V\$GATA1_01 | 0.786278 | 11129 | (-) | SNNGATNNNN           | TGTCATCATA          |
| M0007 |             |          |       |     |                      |                     |
| 6     | V\$GATA2_01 | 0.829048 | 11129 | (-) | NNNGATRNNN           | TGTCATCATA          |
| M0007 |             |          |       |     |                      |                     |
| 6     | V\$GATA2_01 | 0.784393 | 11132 | (+) | NNNGATRNNN           | CATCATATTT          |
| M0007 |             |          |       |     |                      |                     |
| 5     | V\$GATA1_01 | 0.8154   | 11146 | (+) | SNNGATNNNN           | GTTGATCCCC          |
| M0007 |             |          |       |     |                      |                     |
| 5     | V\$GATA1_01 | 0.775913 | 11146 | (-) | SNNGATNNNN           | GTTGATCCCC          |
| M0007 |             |          |       |     |                      |                     |
| 6     | V\$GATA2_01 | 0.8083   | 11146 | (-) | NNNGATRNNN           | GTTGATCCCC          |
| M0007 |             |          |       |     |                      |                     |
| 5     | V\$GATA1_01 | 0.823791 | 11155 | (+) | SNNGATNNNN           | CAGGATTAG           |
| M0007 |             |          |       |     |                      |                     |
| 6     | V\$GATA2_01 | 0.826342 | 11155 | (+) | NNNGATRNNN           | CAGGATTAG           |
| M0012 |             |          |       |     |                      |                     |
| 7     | V\$GATA1_03 | 0.794708 | 11201 | (-) | RNSNNGATAANNGN       | TCTGTTATTCAGAC      |
| M0016 |             |          |       |     |                      |                     |
| 2     | V\$OCT1_06  | 0.800781 | 32    | (+) | CWNAWTKWSATRYN       | CAGTCTGGGTTCA       |
| M0013 |             |          |       |     |                      |                     |
| 5     | V\$OCT1_01  | 0.805227 | 50    | (-) | NNNNWTATGCAAATNTNNN  | ATTATGTTTACATATGGCA |
| M0013 |             |          |       |     |                      |                     |
| 7     | V\$OCT1_03  | 0.86132  | 51    | (-) | NNNRTAATNANNN        | TTATGTTTACATA       |
| M0016 |             |          |       |     |                      |                     |
| 2     | V\$OCT1_06  | 0.806641 | 52    | (+) | CWNAWTKWSATRYN       | TATGTTTACATATG      |
| M0013 |             |          |       |     | NNNNNNNWATGCAAATNNNW | GTTTACATATGG-       |
| 8     | V\$OCT1_04  | 0.826014 | 55    | (+) | NNW                  | CAAAATTATGA         |
| M0013 |             |          |       |     |                      |                     |
| 5     | V\$OCT1_01  | 0.752957 | 57    | (+) | NNNNWTATGCAAATNTNNN  | TTACATATGGCAAAATTAT |
| M0016 |             |          |       |     |                      |                     |
| 2     | V\$OCT1_06  | 0.842187 | 60    | (-) | CWNAWTKWSATRYN       | CATATGGCAAAATT      |
| M0013 |             |          |       |     |                      |                     |
| 7     | V\$OCT1_03  | 0.849862 | 66    | (-) | NNNRTAATNANNN        | GCAAAATTATGAT       |
| M0013 |             |          |       |     | NNNNNNNWATGCAAATNNNW | GCAAAATTATGATGAT-   |
| 8     | V\$OCT1_04  | 0.819113 | 66    | (+) | NNW                  | TTCACTT             |
| M0013 |             |          |       |     |                      |                     |
| 5     | V\$OCT1_01  | 0.768218 | 68    | (+) | NNNNWTATGCAAATNTNNN  | AAAATTATGATGATTTTAC |
| M0024 |             |          |       |     |                      |                     |
| 8     | V\$OCT1_07  | 0.799449 | 71    | (+) | TNTATGNTAATT         | ATTATGATGATT        |
| M0013 |             |          |       |     | NNNNNNNWATGCAAATNNNW | ACTCCTCATTTA-       |
| 8     | V\$OCT1_04  | 0.785864 | 107   | (-) | NNW                  | TATGCATTTGT         |
| M0013 |             |          |       |     | NNNNNNNWATGCAAATNNNW | CTCATTTATATGCATTT-  |
| 8     | V\$OCT1_04  | 0.83166  | 111   | (-) | NNW                  | GTAAC               |
| M0016 |             |          |       |     |                      |                     |
| 2     | V\$OCT1_06  | 0.894531 | 111   | (+) | CWNAWTKWSATRYN       | CTCATTTATATGCA      |
| M0019 |             |          |       |     |                      |                     |
| 5     | V\$OCT1_Q6  | 0.854531 | 111   | (-) | NNNNATGCAAATNAN      | CTCATTTATATGCAT     |
| M0013 |             |          |       |     | NNNNNNNWATGCAAATNNNW | TCATTTATATGCATTT-   |
| 8     | V\$OCT1_04  | 0.80092  | 112   | (+) | NNW                  | GTAAC               |
| M0013 |             |          |       |     |                      |                     |
| 5     | V\$OCT1_01  | 0.760969 | 113   | (-) | NNNNWTATGCAAATNTNNN  | CATTTATATGCATTTGTAA |
| M0013 |             |          |       |     |                      |                     |
| 5     | V\$OCT1_01  | 0.744945 | 114   | (+) | NNNNWTATGCAAATNTNNN  | ATTTATATGCATTTGTAAC |
| M0013 |             |          |       |     |                      |                     |
| 6     | V\$OCT1_02  | 0.865728 | 114   | (+) | NNGAATATKCANNNN      | ATTTATATGCATTTG     |
| M0013 |             |          |       |     |                      |                     |
| 6     | V\$OCT1_02  | 0.785057 | 117   | (-) | NNGAATATKCANNNN      | TATATGCATTTGTAA     |
| M0013 |             |          |       |     |                      |                     |
| 5     | V\$OCT1_01  | 0.730065 | 120   | (+) | NNNNWTATGCAAATNTNNN  | ATGCATTTGTAAC       |
| M0013 |             |          |       |     | NNNNNNNWATGCAAATNNNW | TTGTAAC             |
| 8     | V\$OCT1_04  | 0.804475 | 126   | (+) | NNW                  | TTTCAAA-            |
| M0016 |             |          |       |     |                      | TATTGATA            |
| 2     | V\$OCT1_06  | 0.821094 | 130   | (-) | CWNAWTKWSATRYN       | AACTTTTCAAATAT      |
| M0013 |             |          |       |     |                      |                     |
| 6     | V\$OCT1_02  | 0.801299 | 133   | (-) | NNGAATATKCANNNN      | TTTTCAAATATTGAT     |

|       |            |          |     |     |                      |                          |
|-------|------------|----------|-----|-----|----------------------|--------------------------|
| M0013 |            |          |     |     | NNNNNNNWATGCAAATNNNW | AGCTTAAAAATGCATTT-GCAAAT |
| 8     | V\$OCT1_04 | 0.797783 | 162 | (-) | NNW                  |                          |
| M0013 |            |          |     |     |                      |                          |
| 6     | V\$OCT1_02 | 0.810504 | 165 | (+) | NNGAATATKCANNNN      | TTAAAAATGCATTTG          |
| M0013 |            |          |     |     |                      |                          |
| 6     | V\$OCT1_02 | 0.835679 | 168 | (-) | NNGAATATKCANNNN      | AAAATGCATTTGCAA          |
| M0013 |            |          |     |     | NNNNNNNWATGCAAATNNNW | AAATGCATTTGCAAATGTT-GATA |
| 8     | V\$OCT1_04 | 0.828733 | 169 | (+) | NNW                  |                          |
| M0013 |            |          |     |     |                      |                          |
| 5     | V\$OCT1_01 | 0.814765 | 170 | (-) | NNNNWTATGCAAATNTNNN  | AATGCATTTGCAAATGTTG      |
| M0013 |            |          |     |     |                      |                          |
| 5     | V\$OCT1_01 | 0.862457 | 171 | (+) | NNNNWTATGCAAATNTNNN  | ATGCATTTGCAAATGTTGA      |
| M0013 |            |          |     |     |                      |                          |
| 6     | V\$OCT1_02 | 0.799675 | 171 | (+) | NNGAATATKCANNNN      | ATGCATTTGCAAATG          |
| M0019 |            |          |     |     |                      |                          |
| 5     | V\$OCT1_Q6 | 0.80595  | 172 | (-) | NNNNATGCAAATNAN      | TGCATTTGCAAATGT          |
| M0016 |            |          |     |     |                      |                          |
| 2     | V\$OCT1_06 | 0.821484 | 174 | (-) | CWNAWTKWSATRYN       | CATTTGCAAATGTT           |
| M0013 |            |          |     |     | NNNNNNNWATGCAAATNNNW | ATTTGCAAATGTTGATACTA-TCT |
| 8     | V\$OCT1_04 | 0.801757 | 175 | (+) | NNW                  |                          |
| M0016 |            |          |     |     |                      |                          |
| 2     | V\$OCT1_06 | 0.878516 | 180 | (+) | CWNAWTKWSATRYN       | CAAATGTTGATACT           |
| M0013 |            |          |     |     |                      |                          |
| 6     | V\$OCT1_02 | 0.795885 | 209 | (-) | NNGAATATKCANNNN      | TAGGTGAAAAATCAT          |
| M0013 |            |          |     |     |                      |                          |
| 6     | V\$OCT1_02 | 0.780184 | 212 | (+) | NNGAATATKCANNNN      | GTGAAAAATCATATA          |
| M0016 |            |          |     |     |                      |                          |
| 2     | V\$OCT1_06 | 0.821484 | 216 | (-) | CWNAWTKWSATRYN       | AAAATCATATAGTT           |
| M0013 |            |          |     |     | NNNNNNNWATGCAAATNNNW | TAGTTTTATAAACATCAAA-TAAT |
| 8     | V\$OCT1_04 | 0.817859 | 225 | (-) | NNW                  |                          |
| M0016 |            |          |     |     |                      |                          |
| 2     | V\$OCT1_06 | 0.932031 | 235 | (-) | CWNAWTKWSATRYN       | AACATCAAATAATT           |
| M0016 |            |          |     |     |                      |                          |
| 2     | V\$OCT1_06 | 0.834375 | 245 | (+) | CWNAWTKWSATRYN       | AATTTTTTGATGAC           |
| M0013 |            |          |     |     |                      |                          |
| 7     | V\$OCT1_03 | 0.849862 | 259 | (+) | NNNRTAATNANNN        | TTGGTAACTAAAT            |
| M0016 |            |          |     |     |                      |                          |
| 2     | V\$OCT1_06 | 0.821484 | 261 | (+) | CWNAWTKWSATRYN       | GGTAACTAAATTCT           |
| M0016 |            |          |     |     |                      |                          |
| 2     | V\$OCT1_06 | 0.826562 | 261 | (-) | CWNAWTKWSATRYN       | GGTAACTAAATTCT           |
| M0016 |            |          |     |     |                      |                          |
| 2     | V\$OCT1_06 | 0.808203 | 268 | (-) | CWNAWTKWSATRYN       | AAATTCTCATAGAT           |
| M0024 |            |          |     |     |                      |                          |
| 8     | V\$OCT1_07 | 0.829341 | 269 | (-) | TNTATGNTAATT         | AATTCTCATAGA             |
| M0013 |            |          |     |     | NNNNNNNWATGCAAATNNNW | TCTCATA-                 |
| 8     | V\$OCT1_04 | 0.800711 | 272 | (+) | NNW                  | GATGAAAAAGTAGATA         |
| M0016 |            |          |     |     |                      |                          |
| 2     | V\$OCT1_06 | 0.867969 | 283 | (+) | CWNAWTKWSATRYN       | AAAAAGTAGATACA           |
| M0013 |            |          |     |     | NNNNNNNWATGCAAATNNNW | AAAAGTAGATA-             |
| 8     | V\$OCT1_04 | 0.792974 | 284 | (+) | NNW                  | CATAATTTCAGT             |
| M0016 |            |          |     |     |                      |                          |
| 2     | V\$OCT1_06 | 0.804297 | 295 | (+) | CWNAWTKWSATRYN       | CATAATTTTCAGTAA          |
| M0024 |            |          |     |     |                      |                          |
| 8     | V\$OCT1_07 | 0.810473 | 298 | (-) | TNTATGNTAATT         | AATTTTCAGTAAA            |
| M0013 |            |          |     |     |                      |                          |
| 7     | V\$OCT1_03 | 0.850257 | 302 | (+) | NNNRTAATNANNN        | TCAGTAAAGACTT            |
| M0013 |            |          |     |     | NNNNNNNWATGCAAATNNNW | TGAAGTAAAGTT-            |
| 8     | V\$OCT1_04 | 0.804266 | 319 | (-) | NNW                  | GAATTATCTTTG             |
| M0013 |            |          |     |     |                      |                          |
| 6     | V\$OCT1_02 | 0.83595  | 325 | (-) | NNGAATATKCANNNN      | AAGTTGAATTATCTT          |
| M0013 |            |          |     |     | NNNNNNNWATGCAAATNNNW | TCAATTCTATGGAAAGTT-GTTAT |
| 8     | V\$OCT1_04 | 0.790882 | 343 | (+) | NNW                  |                          |
| M0013 |            |          |     |     |                      |                          |
| 5     | V\$OCT1_01 | 0.741511 | 345 | (+) | NNNNWTATGCAAATNTNNN  | AATTCTATGGAAAGTTGTT      |
| M0016 |            |          |     |     |                      |                          |
| 2     | V\$OCT1_06 | 0.804297 | 348 | (-) | CWNAWTKWSATRYN       | TCTATGGAAAGTTG           |

|       |            |          |     |     |                       |                       |
|-------|------------|----------|-----|-----|-----------------------|-----------------------|
| M0024 |            |          |     |     |                       |                       |
| 8     | V\$OCT1_07 | 0.874073 | 348 | (+) | TNTATGNTAATT          | TCTATGGAAAAGT         |
| M0013 |            |          |     |     | NNNNNNNNWATGCAAATNNNW | AAAGTTGTTATGCAGAA-    |
| 8     | V\$OCT1_04 | 0.804684 | 355 | (-) | NNW                   | TAATTT                |
| M0013 |            |          |     |     |                       |                       |
| 7     | V\$OCT1_03 | 0.845516 | 356 | (-) | NNNRTAATNANNN         | AAGTTGTTATGCA         |
| M0013 |            |          |     |     | NNNNNNNNWATGCAAATNNNW | AAGTTGTTATGCAGAA-     |
| 8     | V\$OCT1_04 | 0.86261  | 356 | (+) | NNW                   | TAATTTA               |
| M0013 |            |          |     |     |                       |                       |
| 5     | V\$OCT1_01 | 0.731591 | 358 | (+) | NNNNWTATGCAAATNTNNN   | GTTGTTATGCAGAATAATT   |
| M0013 |            |          |     |     |                       |                       |
| 6     | V\$OCT1_02 | 0.801029 | 358 | (+) | NNGAATATKCANNNN       | GTTGTTATGCAGAAT       |
| M0013 |            |          |     |     | NNNNNNNNWATGCAAATNNNW | GCAGAA-               |
| 8     | V\$OCT1_04 | 0.819113 | 366 | (+) | NNW                   | TAATTTATAATCTTTTT     |
| M0013 |            |          |     |     | NNNNNNNNWATGCAAATNNNW | AGAA-                 |
| 8     | V\$OCT1_04 | 0.798202 | 368 | (-) | NNW                   | TAATTTATAATCTTTTTAA   |
| M0019 |            |          |     |     |                       |                       |
| 5     | V\$OCT1_Q6 | 0.801583 | 371 | (-) | NNNNATGCAAATNAN       | ATAATTTATAATCTT       |
| M0013 |            |          |     |     |                       |                       |
| 7     | V\$OCT1_03 | 0.868827 | 375 | (+) | NNNRTAATNANNN         | TTTATAATCTTTT         |
| M0016 |            |          |     |     |                       |                       |
| 2     | V\$OCT1_06 | 0.816016 | 388 | (-) | CWNAWKWSATRYN         | TAAGTGTCATGGAT        |
| M0016 |            |          |     |     |                       |                       |
| 2     | V\$OCT1_06 | 0.834375 | 405 | (-) | CWNAWKWSATRYN         | AGCATTTCTGGTAG        |
| M0013 |            |          |     |     |                       |                       |
| 6     | V\$OCT1_02 | 0.814293 | 413 | (-) | NNGAATATKCANNNN       | TGGTAGAATATTCA        |
| M0016 |            |          |     |     |                       |                       |
| 2     | V\$OCT1_06 | 0.877734 | 419 | (-) | CWNAWKWSATRYN         | AATATTTCAAGGCC        |
| M0013 |            |          |     |     | NNNNNNNNWATGCAAATNNNW | CTTTTTCCATGCATAAGTTTA |
| 8     | V\$OCT1_04 | 0.788373 | 434 | (-) | NNW                   | A                     |
| M0016 |            |          |     |     |                       |                       |
| 2     | V\$OCT1_06 | 0.88125  | 434 | (+) | CWNAWKWSATRYN         | CTTTTTCCATGCA         |
| M0019 |            |          |     |     |                       |                       |
| 5     | V\$OCT1_Q6 | 0.805677 | 434 | (-) | NNNNATGCAAATNAN       | CTTTTTCCATGCAT        |
| M0013 |            |          |     |     | NNNNNNNNWATGCAAATNNNW | TTTTTCCATGCATAAGTTTAA |
| 8     | V\$OCT1_04 | 0.814722 | 435 | (+) | NNW                   | T                     |
| M0013 |            |          |     |     |                       |                       |
| 6     | V\$OCT1_02 | 0.810233 | 440 | (-) | NNGAATATKCANNNN       | TCCATGCATAAGTTT       |
| M0013 |            |          |     |     | NNNNNNNNWATGCAAATNNNW | ATAAGTTTAATTAAATTAATT |
| 8     | V\$OCT1_04 | 0.80343  | 447 | (+) | NNW                   | CT                    |
| M0024 |            |          |     |     |                       |                       |
| 8     | V\$OCT1_07 | 0.807717 | 452 | (+) | TNTATGNTAATT          | TTTAATTAAATT          |
| M0016 |            |          |     |     |                       |                       |
| 2     | V\$OCT1_06 | 0.839844 | 453 | (-) | CWNAWKWSATRYN         | TTAATTAAATTAAT        |
| M0024 |            |          |     |     |                       |                       |
| 8     | V\$OCT1_07 | 0.812381 | 455 | (-) | TNTATGNTAATT          | AATTAAATTAAT          |
| M0016 |            |          |     |     |                       |                       |
| 2     | V\$OCT1_06 | 0.826562 | 456 | (+) | CWNAWKWSATRYN         | ATTAAATTAATTCT        |
| M0016 |            |          |     |     |                       |                       |
| 2     | V\$OCT1_06 | 0.898437 | 476 | (-) | CWNAWKWSATRYN         | GATATGTCAAAGAT        |
| M0016 |            |          |     |     |                       |                       |
| 2     | V\$OCT1_06 | 0.831641 | 478 | (-) | CWNAWKWSATRYN         | TATGTCAAAGATAG        |
| M0013 |            |          |     |     | NNNNNNNNWATGCAAATNNNW | TCAAAGATAGACAAATAGA-  |
| 8     | V\$OCT1_04 | 0.809285 | 482 | (+) | NNW                   | TATA                  |
| M0016 |            |          |     |     |                       |                       |
| 2     | V\$OCT1_06 | 0.855078 | 491 | (+) | CWNAWKWSATRYN         | GACAAATAGATATA        |
| M0013 |            |          |     |     |                       |                       |
| 5     | V\$OCT1_01 | 0.741129 | 510 | (+) | NNNNWTATGCAAATNTNNN   | CTACTTTTGTAAGATGGT    |
| M0013 |            |          |     |     |                       |                       |
| 7     | V\$OCT1_03 | 0.878309 | 515 | (+) | NNNRTAATNANNN         | TTGTAAAGATGG          |
| M0013 |            |          |     |     | NNNNNNNNWATGCAAATNNNW | TTGTAAAGATGGTTATAGTT- |
| 8     | V\$OCT1_04 | 0.797156 | 516 | (+) | NNW                   | GGA                   |
| M0013 |            |          |     |     | NNNNNNNNWATGCAAATNNNW | TGGTTATAGTTGGA-       |
| 8     | V\$OCT1_04 | 0.786073 | 525 | (-) | NNW                   | TATTCAGAA             |
| M0013 |            |          |     |     |                       |                       |
| 5     | V\$OCT1_01 | 0.784052 | 527 | (-) | NNNNWTATGCAAATNTNNN   | GTTATAGTTGGATATTCAG   |

|       |   |            |          |     |     |                       |                         |
|-------|---|------------|----------|-----|-----|-----------------------|-------------------------|
| M0016 | 2 | V\$OCT1_06 | 0.804297 | 529 | (+) | CWNAWTKWSATRYN        | TATAGTTGGATATT          |
| M0013 | 6 | V\$OCT1_02 | 0.888468 | 531 | (-) | NNGAATATKCANNNN       | TAGTTGGATATTCAG         |
| M0013 | 8 | V\$OCT1_04 | 0.798202 | 531 | (-) | NNNNNNNNWATGCAAATNNNW | TAGTTGGA-               |
| M0013 | 6 | V\$OCT1_02 | 0.858148 | 534 | (+) | NNNNNNNNWATGCAAATNNNW | TATTCAGAAGGATGC         |
| M0013 | 8 | V\$OCT1_04 | 0.803011 | 542 | (+) | NNW                   | TTGGATATTCAGAAG         |
| M0013 | 5 | V\$OCT1_01 | 0.747997 | 544 | (+) | NNNNNNNNWATGCAAATNNNW | TCAGAAGGATGCAAGTGGA-    |
| M0016 | 2 | V\$OCT1_06 | 0.803125 | 564 | (+) | NNW                   | TAAA                    |
| M0016 | 2 | V\$OCT1_06 | 0.839453 | 565 | (-) | NNNNWTATGCAAATNTNNN   | AGAAGGATGCAAGTGGATA     |
| M0016 | 2 | V\$OCT1_06 | 0.813672 | 569 | (+) | CWNAWTKWSATRYN        | AAGTAGTAAATTTA          |
| M0013 | 8 | V\$OCT1_04 | 0.7844   | 571 | (-) | CWNAWTKWSATRYN        | AGTAGTAAATTTAT          |
| M0013 | 8 | V\$OCT1_04 | 0.783982 | 579 | (-) | CWNAWTKWSATRYN        | GTAAATTTATTTTG          |
| M0013 | 8 | V\$OCT1_04 | 0.7867   | 580 | (+) | NNNNNNNNWATGCAAATNNNW | AAATTTATTTT-            |
| M0016 | 2 | V\$OCT1_06 | 0.804297 | 583 | (-) | NNNNNNNNWATGCAAATNNNW | GGGTTTATAAAT            |
| M0013 | 6 | V\$OCT1_02 | 0.778289 | 585 | (-) | NNW                   | TTGGGTTTATAAAA-         |
| M0013 | 7 | V\$OCT1_03 | 0.877914 | 585 | (+) | NNNNNNNNWATGCAAATNNNW | TATGTCTTC               |
| M0013 | 8 | V\$OCT1_04 | 0.7821   | 585 | (-) | NNW                   | TTGGGTTTATAAAA-         |
| M0013 | 6 | V\$OCT1_02 | 0.778831 | 588 | (+) | NNW                   | TATGTCTTCT              |
| M0013 | 7 | V\$OCT1_03 | 0.877519 | 597 | (-) | NNNRTAATNANNN         | GGTTTATAAATATG          |
| M0016 | 2 | V\$OCT1_06 | 0.813672 | 610 | (-) | NNNNNNNNWATGCAAATNNNW | TTTATAAATATGTCT         |
| M0019 | 5 | V\$OCT1_Q6 | 0.799672 | 644 | (+) | NNNRTAATNANNN         | TTTATAAATATGT           |
| M0016 | 2 | V\$OCT1_06 | 0.847266 | 645 | (-) | NNNNNNNNWATGCAAATNNNW | TTTATAAAA-              |
| M0016 | 2 | V\$OCT1_06 | 0.821484 | 646 | (+) | NNW                   | TATGTCTTCTTTACT         |
| M0016 | 2 | V\$OCT1_06 | 0.804297 | 647 | (-) | NNGAATATKCANNNN       | ATAAATATGTCTTCT         |
| M0016 | 2 | V\$OCT1_06 | 0.808203 | 682 | (-) | NNNRTAATNANNN         | TCTTCTTTACTAA           |
| M0013 | 8 | V\$OCT1_04 | 0.794437 | 685 | (-) | CWNAWTKWSATRYN        | TGCATTACAGATTCT         |
| M0019 | 5 | V\$OCT1_Q6 | 0.838155 | 689 | (-) | NNNNATGCAAATNAN       | GTATATATAAAATAT         |
| M0024 | 8 | V\$OCT1_07 | 0.838457 | 699 | (+) | CWNAWTKWSATRYN        | TATATATAAAATAT          |
| M0013 | 8 | V\$OCT1_04 | 0.843162 | 728 | (+) | CWNAWTKWSATRYN        | ATATATAAAATATG          |
| M0013 | 5 | V\$OCT1_01 | 0.770889 | 730 | (+) | CWNAWTKWSATRYN        | TATATAAAATATGG          |
| M0019 | 5 | V\$OCT1_Q6 | 0.84607  | 732 | (+) | NNNNNNNNWATGCAAATNNNW | AGTATGTATGATCT          |
| M0016 | 2 | V\$OCT1_06 | 0.876172 | 733 | (-) | NNW                   | ATGTATGATCTGTATTTTTC-   |
| M0013 | 8 | V\$OCT1_04 | 0.833333 | 734 | (+) | NNNNATGCAAATNAN       | TA                      |
|       |   |            |          |     |     | NNNNWTATGCAAATNTNNN   | ATGATCTGTATTTTT         |
|       |   |            |          |     |     | NNNNWTATGCAAATNTNNN   | GTATTTTTTCTAATTTTTC     |
|       |   |            |          |     |     | TNTATGNTAATT          | TTTTTCTAATT             |
|       |   |            |          |     |     | NNNNNNNNWATGCAAATNNNW | TCTAG-                  |
|       |   |            |          |     |     | NNW                   | CACATGTAAATGAAAGTA      |
|       |   |            |          |     |     | NNNNWTATGCAAATNTNNN   | TAGCACATGTAAATGAAAG     |
|       |   |            |          |     |     | NNNNATGCAAATNAN       | GCACATGTAAATGAA         |
|       |   |            |          |     |     | CWNAWTKWSATRYN        | CACATGTAAATGAA          |
|       |   |            |          |     |     | NNNNNNNNWATGCAAATNNNW | ACATGTAAATGAAAGTATTTCTA |



|       |            |          |      |     |                       |                       |
|-------|------------|----------|------|-----|-----------------------|-----------------------|
| M0016 |            |          |      |     |                       |                       |
| 2     | V\$OCT1_06 | 0.924609 | 739  | (-) | CWNAWTKWSATRYN        | TAAATGAAAGTATT        |
| M0016 |            |          |      |     |                       |                       |
| 2     | V\$OCT1_06 | 0.808203 | 747  | (-) | CWNAWTKWSATRYN        | AGTATTTCTAGGTT        |
| M0013 |            |          |      |     |                       |                       |
| 7     | V\$OCT1_03 | 0.884631 | 761  | (+) | NNNRTAATNANNN         | CTTATAATTTGAT         |
| M0016 |            |          |      |     |                       |                       |
| 2     | V\$OCT1_06 | 0.825    | 763  | (+) | CWNAWTKWSATRYN        | TATAATTTGATGGA        |
| M0016 |            |          |      |     |                       |                       |
| 2     | V\$OCT1_06 | 0.855469 | 800  | (-) | CWNAWTKWSATRYN        | GACATCTGAATCTT        |
| M0016 |            |          |      |     |                       |                       |
| 2     | V\$OCT1_06 | 0.842187 | 806  | (-) | CWNAWTKWSATRYN        | TGAATCTTATGATT        |
| M0016 |            |          |      |     |                       |                       |
| 2     | V\$OCT1_06 | 0.826562 | 808  | (+) | CWNAWTKWSATRYN        | AATCTTATGATTCT        |
| M0016 |            |          |      |     |                       |                       |
| 2     | V\$OCT1_06 | 0.88125  | 840  | (+) | CWNAWTKWSATRYN        | CATATAGTCATGTC        |
| M0016 |            |          |      |     |                       |                       |
| 2     | V\$OCT1_06 | 0.842187 | 845  | (+) | CWNAWTKWSATRYN        | AGTCATGTCATGGA        |
| M0016 |            |          |      |     |                       |                       |
| 2     | V\$OCT1_06 | 0.837109 | 846  | (-) | CWNAWTKWSATRYN        | GTCATGTCATGGAT        |
| M0013 |            |          |      |     |                       |                       |
| 6     | V\$OCT1_02 | 0.781267 | 851  | (-) | NNGAATATKCANNNN       | GTCATGGATATACCA       |
| M0013 |            |          |      |     | NNNNNNNNWATGCAAATNNNW | TCATGGATATAC-         |
| 8     | V\$OCT1_04 | 0.802384 | 852  | (+) | NNW                   | CAATGCAGCAA           |
| M0013 |            |          |      |     |                       |                       |
| 5     | V\$OCT1_01 | 0.742274 | 854  | (+) | NNNNWTATGCAAATNTNNN   | ATGGATATACCAATGCAGC   |
| M0013 |            |          |      |     | NNNNNNNNWATGCAAATNNNW | ATATACCAATGCAGCAAAA-  |
| 8     | V\$OCT1_04 | 0.784818 | 858  | (+) | NNW                   | TATA                  |
| M0016 |            |          |      |     |                       |                       |
| 2     | V\$OCT1_06 | 0.803906 | 867  | (-) | CWNAWTKWSATRYN        | TGCAGCAAAATATA        |
| M0016 |            |          |      |     |                       |                       |
| 2     | V\$OCT1_06 | 0.88125  | 875  | (-) | CWNAWTKWSATRYN        | AATATAAAATAATG        |
| M0013 |            |          |      |     |                       |                       |
| 6     | V\$OCT1_02 | 0.779101 | 904  | (+) | NNGAATATKCANNNN       | AAAATAATTCATGGA       |
| M0016 |            |          |      |     |                       |                       |
| 2     | V\$OCT1_06 | 0.800391 | 910  | (+) | CWNAWTKWSATRYN        | ATTCATGGAAGATA        |
| M0016 |            |          |      |     |                       |                       |
| 2     | V\$OCT1_06 | 0.873437 | 983  | (+) | CWNAWTKWSATRYN        | CTAAAATAGATTTA        |
| M0016 |            |          |      |     |                       |                       |
| 2     | V\$OCT1_06 | 0.847656 | 989  | (-) | CWNAWTKWSATRYN        | TAGATTTAAAAGAG        |
| M0016 |            |          |      |     |                       |                       |
| 2     | V\$OCT1_06 | 0.85     | 1000 | (+) | CWNAWTKWSATRYN        | GAGAAAGACATTTT        |
| M0016 |            |          |      |     |                       |                       |
| 2     | V\$OCT1_06 | 0.855078 | 1001 | (-) | CWNAWTKWSATRYN        | AGAAAGACATTTTT        |
| M0013 |            |          |      |     | NNNNNNNNWATGCAAATNNNW | ACATTTTTTTTAAATGTCAGA |
| 8     | V\$OCT1_04 | 0.809912 | 1007 | (-) | NNW                   | TT                    |
| M0016 |            |          |      |     |                       |                       |
| 2     | V\$OCT1_06 | 0.842187 | 1011 | (+) | CWNAWTKWSATRYN        | TTTTTTTAAATGTC        |
| M0016 |            |          |      |     |                       |                       |
| 2     | V\$OCT1_06 | 0.803906 | 1016 | (+) | CWNAWTKWSATRYN        | TTAAATGTCAGATT        |
| M0016 |            |          |      |     |                       |                       |
| 2     | V\$OCT1_06 | 0.85     | 1017 | (-) | CWNAWTKWSATRYN        | TAAATGTCAGATTA        |
| M0016 |            |          |      |     |                       |                       |
| 2     | V\$OCT1_06 | 0.808594 | 1029 | (-) | CWNAWTKWSATRYN        | TAAATTAAATGGGT        |
| M0013 |            |          |      |     | NNNNNNNNWATGCAAATNNNW | TAGTTTACTATA-         |
| 8     | V\$OCT1_04 | 0.850899 | 1054 | (-) | NNW                   | CATTTTAACAA           |
| M0013 |            |          |      |     | NNNNNNNNWATGCAAATNNNW | ACTATA-               |
| 8     | V\$OCT1_04 | 0.820786 | 1060 | (-) | NNW                   | CATTTTAACAAATCTAA     |
| M0013 |            |          |      |     |                       |                       |
| 5     | V\$OCT1_01 | 0.731973 | 1064 | (-) | NNNNWTATGCAAATNTNNN   | TACATTTTAACAAATCTAA   |
| M0016 |            |          |      |     |                       |                       |
| 2     | V\$OCT1_06 | 0.90625  | 1074 | (-) | CWNAWTKWSATRYN        | CAAATCTAATGATC        |
| M0013 |            |          |      |     |                       |                       |
| 7     | V\$OCT1_03 | 0.842355 | 1076 | (+) | NNNRTAATNANNN         | AATCTAATGATCT         |
| M0013 |            |          |      |     |                       |                       |
| 6     | V\$OCT1_02 | 0.776665 | 1089 | (-) | NNGAATATKCANNNN       | AAGAGGAATTTTTT        |

|       |            |          |      |     |                       |                        |
|-------|------------|----------|------|-----|-----------------------|------------------------|
| M0016 |            |          |      |     |                       |                        |
| 2     | V\$OCT1_06 | 0.826562 | 1097 | (+) | CWNAWTKWSATRYN        | TTTTTTTAAATTTT         |
| M0024 |            |          |      |     |                       |                        |
| 8     | V\$OCT1_07 | 0.831673 | 1097 | (+) | TNTATGNTAATT          | TTTTTTTAAATT           |
| M0013 |            |          |      |     | NNNNNNNNWATGCAAATNNNW | TTTTTTAATTTTAACTGAAA-  |
| 8     | V\$OCT1_04 | 0.813258 | 1099 | (-) | NNW                   | TAT                    |
| M0013 |            |          |      |     | NNNNNNNNWATGCAAATNNNW | TTTTTAATTTTAACTGAAA-   |
| 8     | V\$OCT1_04 | 0.789419 | 1100 | (-) | NNW                   | TATT                   |
| M0013 |            |          |      |     | NNNNNNNNWATGCAAATNNNW | TAATTTTAACTGAAA-       |
| 8     | V\$OCT1_04 | 0.810749 | 1104 | (+) | NNW                   | TATTTAAA               |
| M0013 |            |          |      |     | NNNNNNNNWATGCAAATNNNW | AATTTTAACTGAAA-        |
| 8     | V\$OCT1_04 | 0.788791 | 1105 | (-) | NNW                   | TATTTAAAA              |
| M0016 |            |          |      |     |                       |                        |
| 2     | V\$OCT1_06 | 0.860547 | 1109 | (+) | CWNAWTKWSATRYN        | TTAACTGAAATATT         |
| M0016 |            |          |      |     |                       |                        |
| 2     | V\$OCT1_06 | 0.828906 | 1110 | (-) | CWNAWTKWSATRYN        | TAAGTAAATATTT          |
| M0013 |            |          |      |     | NNNNNNNNWATGCAAATNNNW | ACTGAAATATTTAAAAAATT-  |
| 8     | V\$OCT1_04 | 0.833752 | 1112 | (+) | NNW                   | GAGT                   |
| M0013 |            |          |      |     |                       |                        |
| 5     | V\$OCT1_01 | 0.769935 | 1114 | (+) | NNNNWTATGCAAATNTNNN   | TGAAATATTTAAAAAATTGA   |
| M0013 |            |          |      |     |                       |                        |
| 6     | V\$OCT1_02 | 0.792907 | 1114 | (+) | NNGAATATKCANNNN       | TGAAATATTTAAAAA        |
| M0016 |            |          |      |     |                       |                        |
| 2     | V\$OCT1_06 | 0.847266 | 1117 | (+) | CWNAWTKWSATRYN        | AATATTTAAAAAATT        |
| M0016 |            |          |      |     |                       |                        |
| 2     | V\$OCT1_06 | 0.911328 | 1117 | (-) | CWNAWTKWSATRYN        | AATATTTAAAAAATT        |
| M0013 |            |          |      |     |                       |                        |
| 6     | V\$OCT1_02 | 0.776123 | 1126 | (-) | NNGAATATKCANNNN       | AAATTGAGTAGTATT        |
| M0013 |            |          |      |     | NNNNNNNNWATGCAAATNNNW | TGAGTAGTATTTAAA-       |
| 8     | V\$OCT1_04 | 0.804893 | 1130 | (+) | NNW                   | TATGAATG               |
| M0013 |            |          |      |     | NNNNNNNNWATGCAAATNNNW | GAGTAGTATTTAAA-        |
| 8     | V\$OCT1_04 | 0.819741 | 1131 | (-) | NNW                   | TATGAATGC              |
| M0013 |            |          |      |     |                       |                        |
| 5     | V\$OCT1_01 | 0.793399 | 1132 | (+) | NNNNWTATGCAAATNTNNN   | AGTAGTATTTAAATATGAA    |
| M0013 |            |          |      |     |                       |                        |
| 6     | V\$OCT1_02 | 0.776394 | 1132 | (+) | NNGAATATKCANNNN       | AGTAGTATTTAAATA        |
| M0013 |            |          |      |     |                       |                        |
| 5     | V\$OCT1_01 | 0.769935 | 1133 | (-) | NNNNWTATGCAAATNTNNN   | GTAGTATTTAAATATGAAT    |
| M0016 |            |          |      |     |                       |                        |
| 2     | V\$OCT1_06 | 0.903906 | 1135 | (+) | CWNAWTKWSATRYN        | AGTATTTAAATATG         |
| M0016 |            |          |      |     |                       |                        |
| 2     | V\$OCT1_06 | 0.963672 | 1135 | (-) | CWNAWTKWSATRYN        | AGTATTTAAATATG         |
| M0024 |            |          |      |     |                       |                        |
| 8     | V\$OCT1_07 | 0.793301 | 1135 | (+) | TNTATGNTAATT          | AGTATTTAAATA           |
| M0013 |            |          |      |     |                       |                        |
| 6     | V\$OCT1_02 | 0.81294  | 1137 | (-) | NNGAATATKCANNNN       | TATTTAAATATGAAT        |
| M0013 |            |          |      |     | NNNNNNNNWATGCAAATNNNW | TATTTAAA-              |
| 8     | V\$OCT1_04 | 0.840234 | 1137 | (-) | NNW                   | TATGAATGCCTCTCT        |
| M0013 |            |          |      |     |                       |                        |
| 7     | V\$OCT1_03 | 0.903595 | 1174 | (-) | NNNRTAATNANNN         | ACCCTATTACCAC          |
| M0013 |            |          |      |     | NNNNNNNNWATGCAAATNNNW | GAGTGTTAGTGAATAAAAAA-  |
| 8     | V\$OCT1_04 | 0.787118 | 1212 | (+) | NNW                   | TATT                   |
| M0013 |            |          |      |     | NNNNNNNNWATGCAAATNNNW | GTTAGTGAATAAAAAA-      |
| 8     | V\$OCT1_04 | 0.816604 | 1216 | (+) | NNW                   | TATTAATA               |
| M0013 |            |          |      |     |                       |                        |
| 6     | V\$OCT1_02 | 0.815106 | 1217 | (-) | NNGAATATKCANNNN       | TTAGTGAATAAAAAAT       |
| M0013 |            |          |      |     | NNNNNNNNWATGCAAATNNNW | TTAGTGAATAAAAAATATTAA- |
| 8     | V\$OCT1_04 | 0.823505 | 1217 | (-) | NNW                   | TAA                    |
| M0013 |            |          |      |     |                       |                        |
| 7     | V\$OCT1_03 | 0.857369 | 1221 | (+) | NNNRTAATNANNN         | TGAATAAAAAATAT         |
| M0016 |            |          |      |     |                       |                        |
| 2     | V\$OCT1_06 | 0.860547 | 1221 | (-) | CWNAWTKWSATRYN        | TGAATAAAAAATATT        |
| M0013 |            |          |      |     |                       |                        |
| 6     | V\$OCT1_02 | 0.796697 | 1223 | (-) | NNGAATATKCANNNN       | AATAAAAAATATTAAT       |
| M0013 |            |          |      |     | NNNNNNNNWATGCAAATNNNW | AATAAAAAATATTAATAAGA-  |
| 8     | V\$OCT1_04 | 0.79611  | 1223 | (-) | NNW                   | GACT                   |

|       |            |          |      |     |                       |                       |
|-------|------------|----------|------|-----|-----------------------|-----------------------|
| M0024 |            |          |      |     |                       |                       |
| 8     | V\$OCT1_07 | 0.812381 | 1223 | (-) | TNTATGNTAATT          | AATAAAAAATATT         |
| M0013 |            |          |      |     | NNNNNNNNWATGCAAATNNNW | ATAAAAAATATTAATAAGA-  |
| 8     | V\$OCT1_04 | 0.786909 | 1224 | (+) | NNW                   | GACTG                 |
| M0013 |            |          |      |     |                       |                       |
| 6     | V\$OCT1_02 | 0.777206 | 1226 | (+) | NNGAATATKCANNNN       | AAAAATATTAATAAG       |
| M0019 |            |          |      |     |                       |                       |
| 5     | V\$OCT1_Q6 | 0.818504 | 1226 | (+) | NNNNATGCAAATNAN       | AAAAATATTAATAAG       |
| M0016 |            |          |      |     |                       |                       |
| 2     | V\$OCT1_06 | 0.809766 | 1227 | (-) | CWNAWKWSATRYN         | AAAATATTAATAAG        |
| M0016 |            |          |      |     |                       |                       |
| 2     | V\$OCT1_06 | 0.81875  | 1229 | (-) | CWNAWKWSATRYN         | AATATTAATAAGAG        |
| M0016 |            |          |      |     |                       |                       |
| 2     | V\$OCT1_06 | 0.808984 | 1240 | (+) | CWNAWKWSATRYN         | GAGACTGGTATTTC        |
| M0016 |            |          |      |     |                       |                       |
| 2     | V\$OCT1_06 | 0.817187 | 1273 | (-) | CWNAWKWSATRYN         | AGCAAGATAATTTG        |
| M0013 |            |          |      |     | NNNNNNNNWATGCAAATNNNW | CAAGATAATTTGAATGAT-   |
| 8     | V\$OCT1_04 | 0.81514  | 1275 | (-) | NNW                   | TAACA                 |
| M0013 |            |          |      |     |                       |                       |
| 7     | V\$OCT1_03 | 0.847491 | 1276 | (+) | NNNRTAATNANNN         | AAGATAATTTGAA         |
| M0013 |            |          |      |     |                       |                       |
| 5     | V\$OCT1_01 | 0.772987 | 1277 | (-) | NNNNWTATGCAAATNTNNN   | AGATAATTTGAATGATTAA   |
| M0016 |            |          |      |     |                       |                       |
| 1     | V\$OCT1_05 | 0.875145 | 1279 | (+) | MKNATTTGCATAYY        | ATAATTTGAATGAT        |
| M0016 |            |          |      |     |                       |                       |
| 2     | V\$OCT1_06 | 0.839844 | 1279 | (+) | CWNAWKWSATRYN         | ATAATTTGAATGAT        |
| M0019 |            |          |      |     |                       |                       |
| 5     | V\$OCT1_Q6 | 0.844705 | 1279 | (-) | NNNNATGCAAATNAN       | ATAATTTGAATGATT       |
| M0024 |            |          |      |     |                       |                       |
| 8     | V\$OCT1_07 | 0.839093 | 1281 | (-) | TNTATGNTAATT          | AATTTGAATGAT          |
| M0013 |            |          |      |     | NNNNNNNNWATGCAAATNNNW | TTGAATGATTAACATTTA-   |
| 8     | V\$OCT1_04 | 0.844207 | 1284 | (-) | NNW                   | TATTG                 |
| M0013 |            |          |      |     |                       |                       |
| 5     | V\$OCT1_01 | 0.744945 | 1286 | (-) | NNNNWTATGCAAATNTNNN   | GAATGATTAACATTTATAT   |
| M0016 |            |          |      |     |                       |                       |
| 2     | V\$OCT1_06 | 0.847656 | 1288 | (+) | CWNAWKWSATRYN         | ATGATTAACATTTA        |
| M0019 |            |          |      |     |                       |                       |
| 5     | V\$OCT1_Q6 | 0.873908 | 1288 | (-) | NNNNATGCAAATNAN       | ATGATTAACATTTAT       |
| M0013 |            |          |      |     | NNNNNNNNWATGCAAATNNNW | TGATTAACATTTATATTGAA- |
| 8     | V\$OCT1_04 | 0.790673 | 1289 | (+) | NNW                   | TAG                   |
| M0024 |            |          |      |     |                       |                       |
| 8     | V\$OCT1_07 | 0.836337 | 1290 | (-) | TNTATGNTAATT          | GATTAACATTTA          |
| M0013 |            |          |      |     |                       |                       |
| 6     | V\$OCT1_02 | 0.781267 | 1301 | (-) | NNGAATATKCANNNN       | ATATTGAATAGCAAA       |
| M0013 |            |          |      |     | NNNNNNNNWATGCAAATNNNW | TATTGAA-              |
| 8     | V\$OCT1_04 | 0.80092  | 1302 | (+) | NNW                   | TAGCAAAATTAAAAAT      |
| M0013 |            |          |      |     | NNNNNNNNWATGCAAATNNNW | ATAGCAAAATTAAAAATTTA  |
| 8     | V\$OCT1_04 | 0.805939 | 1308 | (+) | NNW                   | AAT                   |
|       |            |          |      |     |                       | AG-                   |
| M0013 |            |          |      |     | NNNNNNNNWATGCAAATNNNW | CAAAATTAAAAATTAAAT-   |
| 8     | V\$OCT1_04 | 0.789837 | 1310 | (-) | NNW                   | TA                    |
| M0016 |            |          |      |     |                       |                       |
| 2     | V\$OCT1_06 | 0.88125  | 1312 | (+) | CWNAWKWSATRYN         | CAAAATTAAAAATT        |
| M0016 |            |          |      |     |                       |                       |
| 2     | V\$OCT1_06 | 0.890625 | 1313 | (-) | CWNAWKWSATRYN         | AAAATTAAAAATTT        |
| M0013 |            |          |      |     | NNNNNNNNWATGCAAATNNNW | AATTAAAAATTAAATTAG-   |
| 8     | V\$OCT1_04 | 0.869511 | 1315 | (+) | NNW                   | TAAA                  |
| M0013 |            |          |      |     | NNNNNNNNWATGCAAATNNNW | ATTAAAAATTAAATTAG-    |
| 8     | V\$OCT1_04 | 0.860937 | 1316 | (-) | NNW                   | TAAA                  |
| M0013 |            |          |      |     |                       |                       |
| 5     | V\$OCT1_01 | 0.732354 | 1317 | (+) | NNNNWTATGCAAATNTNNN   | TTAAAAATTAAATTAGTA    |
| M0013 |            |          |      |     |                       |                       |
| 5     | V\$OCT1_01 | 0.741892 | 1318 | (-) | NNNNWTATGCAAATNTNNN   | TAAAAATTAAATTAGTAA    |
| M0016 |            |          |      |     |                       |                       |
| 2     | V\$OCT1_06 | 0.834375 | 1319 | (+) | CWNAWKWSATRYN         | AAAAATTAAATTA         |

|       |            |          |      |     |                      |                        |
|-------|------------|----------|------|-----|----------------------|------------------------|
| M0019 |            |          |      |     |                      |                        |
| 5     | V\$OCT1_Q6 | 0.864083 | 1319 | (+) | NNNNATGCAAATNAN      | AAAAATTTAAATTAG        |
| M0016 |            |          |      |     |                      |                        |
| 2     | V\$OCT1_06 | 0.834766 | 1320 | (+) | CWNAWTKWSATRYN       | AAAATTTAAATTAG         |
| M0016 |            |          |      |     |                      |                        |
| 2     | V\$OCT1_06 | 0.942969 | 1320 | (-) | CWNAWTKWSATRYN       | AAAATTTAAATTAG         |
| M0024 |            |          |      |     |                      |                        |
| 8     | V\$OCT1_07 | 0.832309 | 1320 | (+) | TNTATGNTAATT         | AAAATTTAAATT           |
| M0013 |            |          |      |     | NNNNNNNWATGCAAATNNNW | AATTTAAATTAGTAAAAA-    |
| 8     | V\$OCT1_04 | 0.806148 | 1322 | (-) | NNW                  | TATTA                  |
| M0024 |            |          |      |     |                      |                        |
| 8     | V\$OCT1_07 | 0.806869 | 1322 | (-) | TNTATGNTAATT         | AATTTAAATTAG           |
| M0013 |            |          |      |     |                      |                        |
| 5     | V\$OCT1_01 | 0.754865 | 1324 | (-) | NNNNWTATGCAAATNTNNN  | TTTAAATTAGTAAAAATAT    |
| M0013 |            |          |      |     | NNNNNNNWATGCAAATNNNW | TTTAAATTAGTAAAAA-      |
| 8     | V\$OCT1_04 | 0.812631 | 1324 | (+) | NNW                  | TATTA                  |
| M0024 |            |          |      |     |                      |                        |
| 8     | V\$OCT1_07 | 0.800297 | 1328 | (-) | TNTATGNTAATT         | AATTAGTAAAAA           |
| M0013 |            |          |      |     |                      |                        |
| 7     | V\$OCT1_03 | 0.870802 | 1330 | (+) | NNNRTAATNANNN        | TTAGTAAAAATAT          |
| M0013 |            |          |      |     | NNNNNNNWATGCAAATNNNW | TAGTAAAAA-             |
| 8     | V\$OCT1_04 | 0.815767 | 1331 | (+) | NNW                  | TATTAAACAAATGA         |
| M0013 |            |          |      |     |                      |                        |
| 6     | V\$OCT1_02 | 0.787223 | 1335 | (+) | NNGAATATKCANNNN      | AAAAATATTAAACAA        |
| M0013 |            |          |      |     | NNNNNNNWATGCAAATNNNW | AAAA-                  |
| 8     | V\$OCT1_04 | 0.784818 | 1336 | (+) | NNW                  | TATTAAACAAATGAACTA     |
| M0016 |            |          |      |     |                      |                        |
| 2     | V\$OCT1_06 | 0.826562 | 1338 | (-) | CWNAWTKWSATRYN       | AATATTAAACAAAT         |
| M0013 |            |          |      |     | NNNNNNNWATGCAAATNNNW | TTAAACAAATGAAAC-       |
| 8     | V\$OCT1_04 | 0.795483 | 1342 | (+) | NNW                  | TATTTTTA               |
| M0016 |            |          |      |     |                      |                        |
| 2     | V\$OCT1_06 | 0.855469 | 1347 | (-) | CWNAWTKWSATRYN       | CAAATGAAACTATT         |
| M0013 |            |          |      |     | NNNNNNNWATGCAAATNNNW | ATGAAAC-               |
| 8     | V\$OCT1_04 | 0.837097 | 1350 | (+) | NNW                  | TATTTTTATTATAACA       |
| M0013 |            |          |      |     | NNNNNNNWATGCAAATNNNW | TGAAAC-                |
| 8     | V\$OCT1_04 | 0.819532 | 1351 | (-) | NNW                  | TATTTTTATTATAACAC      |
| M0024 |            |          |      |     |                      |                        |
| 8     | V\$OCT1_07 | 0.817257 | 1355 | (+) | TNTATGNTAATT         | ACTATTTTTATT           |
| M0016 |            |          |      |     |                      |                        |
| 2     | V\$OCT1_06 | 0.831641 | 1356 | (+) | CWNAWTKWSATRYN       | CTATTTTTATTATA         |
| M0013 |            |          |      |     |                      |                        |
| 7     | V\$OCT1_03 | 0.898064 | 1359 | (-) | NNNRTAATNANNN        | TTTTTATTATAAC          |
| M0013 |            |          |      |     | NNNNNNNWATGCAAATNNNW | GATTTTTTTTTTCAT-       |
| 8     | V\$OCT1_04 | 0.79862  | 1396 | (-) | NNW                  | ATGAAACC               |
| M0013 |            |          |      |     | NNNNNNNWATGCAAATNNNW | ATTTTTTTTTTCATATGAAAC- |
| 8     | V\$OCT1_04 | 0.820995 | 1397 | (+) | NNW                  | CA                     |
| M0013 |            |          |      |     |                      |                        |
| 5     | V\$OCT1_01 | 0.763068 | 1398 | (-) | NNNNWTATGCAAATNTNNN  | TTTTTTTTTTCATATGAAA    |
| M0016 |            |          |      |     |                      |                        |
| 2     | V\$OCT1_06 | 0.847266 | 1400 | (+) | CWNAWTKWSATRYN       | TTTTTTTTTCATATG        |
| M0016 |            |          |      |     |                      |                        |
| 2     | V\$OCT1_06 | 0.826562 | 1412 | (-) | CWNAWTKWSATRYN       | TGAAACCAAATTTT         |
| M0016 |            |          |      |     |                      |                        |
| 2     | V\$OCT1_06 | 0.852734 | 1418 | (+) | CWNAWTKWSATRYN       | CAAATTTTATTATC         |
| M0016 |            |          |      |     |                      |                        |
| 2     | V\$OCT1_06 | 0.842578 | 1418 | (-) | CWNAWTKWSATRYN       | CAAATTTTATTATC         |
| M0013 |            |          |      |     |                      |                        |
| 7     | V\$OCT1_03 | 0.915844 | 1421 | (-) | NNNRTAATNANNN        | ATTTTATTATCAG          |
| M0013 |            |          |      |     |                      |                        |
| 7     | V\$OCT1_03 | 0.856183 | 1489 | (-) | NNNRTAATNANNN        | TCATCCTTACCTG          |
| M0016 |            |          |      |     |                      |                        |
| 2     | V\$OCT1_06 | 0.85     | 1490 | (+) | CWNAWTKWSATRYN       | CATCCTTACCTGCC         |
| M0013 |            |          |      |     |                      |                        |
| 6     | V\$OCT1_02 | 0.772875 | 1604 | (-) | NNGAATATKCANNNN      | ACTGAGAATAATAAA        |
| M0013 |            |          |      |     |                      |                        |
| 7     | V\$OCT1_03 | 0.887396 | 1608 | (+) | NNNRTAATNANNN        | AGAATAATAAAGT          |

|       |            |          |      |     |                       |                        |
|-------|------------|----------|------|-----|-----------------------|------------------------|
| M0016 |            |          |      |     |                       |                        |
| 2     | V\$OCT1_06 | 0.813672 | 1610 | (-) | CWNAWTKWSATRYN        | AATAATAAAGTGTT         |
| M0013 |            |          |      |     |                       |                        |
| 7     | V\$OCT1_03 | 0.858949 | 1631 | (-) | NNNRTAATNANNN         | CTCTAATTAGCTA          |
| M0013 |            |          |      |     | NNNNNNNNWATGCAAATNNNW | ATTGAAGTCTTGA-         |
| 8     | V\$OCT1_04 | 0.799247 | 1643 | (+) | NNW                   | TATTA AAACT            |
| M0013 |            |          |      |     | NNNNNNNNWATGCAAATNNNW | TCTTGATATTA AAACTATGA- |
| 8     | V\$OCT1_04 | 0.780217 | 1650 | (-) | NNW                   | TAA                    |
| M0016 |            |          |      |     |                       |                        |
| 2     | V\$OCT1_06 | 0.826562 | 1654 | (-) | CWNAWTKWSATRYN        | GATATTAAAACTAT         |
| M0013 |            |          |      |     | NNNNNNNNWATGCAAATNNNW | TTAAAACTATGA-          |
| 8     | V\$OCT1_04 | 0.794019 | 1658 | (+) | NNW                   | TAATCCTTCAC            |
| M0013 |            |          |      |     |                       |                        |
| 5     | V\$OCT1_01 | 0.748951 | 1660 | (+) | NNNNWTATGCAAATNTNNN   | AAAACTATGATAATCCTTC    |
| M0019 |            |          |      |     |                       |                        |
| 5     | V\$OCT1_Q6 | 0.814138 | 1662 | (+) | NNNNATGCAAATNAN       | AACTATGATAATCCT        |
| M0016 |            |          |      |     |                       |                        |
| 1     | V\$OCT1_05 | 0.880292 | 1663 | (-) | MKNATTTGCATAYY        | ACTATGATAATCCT         |
| M0024 |            |          |      |     |                       |                        |
| 8     | V\$OCT1_07 | 0.804325 | 1663 | (+) | TNTATGNTAATT          | ACTATGATAATC           |
| M0016 |            |          |      |     |                       |                        |
| 2     | V\$OCT1_06 | 0.821484 | 1672 | (+) | CWNAWTKWSATRYN        | ATCCTTCACATTTT         |
| M0019 |            |          |      |     |                       |                        |
| 5     | V\$OCT1_Q6 | 0.812773 | 1672 | (-) | NNNNATGCAAATNAN       | ATCCTTCACATTTTG        |
| M0016 |            |          |      |     |                       |                        |
| 2     | V\$OCT1_06 | 0.817187 | 1673 | (-) | CWNAWTKWSATRYN        | TCCTTCACATTTTG         |
| M0013 |            |          |      |     |                       |                        |
| 7     | V\$OCT1_03 | 0.879494 | 1685 | (-) | NNNRTAATNANNN         | TGGTCATTATTAT          |
| M0013 |            |          |      |     |                       |                        |
| 7     | V\$OCT1_03 | 0.924931 | 1688 | (-) | NNNRTAATNANNN         | TCATTATTATGTA          |
| M0013 |            |          |      |     |                       |                        |
| 6     | V\$OCT1_02 | 0.771251 | 1690 | (+) | NNGAATATKCANNNN       | ATTATTATGTAGTTC        |
| M0016 |            |          |      |     |                       |                        |
| 2     | V\$OCT1_06 | 0.808203 | 1696 | (+) | CWNAWTKWSATRYN        | ATGTAGTTCATTCA         |
| M0016 |            |          |      |     |                       |                        |
| 2     | V\$OCT1_06 | 0.860547 | 1697 | (-) | CWNAWTKWSATRYN        | TGTAGTTCATT CAG        |
| M0016 |            |          |      |     |                       |                        |
| 2     | V\$OCT1_06 | 0.916797 | 1732 | (+) | CWNAWTKWSATRYN        | CTGCTTGAAATATA         |
| M0016 |            |          |      |     |                       |                        |
| 2     | V\$OCT1_06 | 0.842578 | 1738 | (-) | CWNAWTKWSATRYN        | GAAATATAAATCTC         |
| M0013 |            |          |      |     | NNNNNNNNWATGCAAATNNNW | AATCTCTCATGATAAAAAA-   |
| 8     | V\$OCT1_04 | 0.7867   | 1746 | (+) | NNW                   | TAAT                   |
| M0013 |            |          |      |     | NNNNNNNNWATGCAAATNNNW | GATAAAAAATAATAATAA-    |
| 8     | V\$OCT1_04 | 0.799247 | 1756 | (+) | NNW                   | TAATA                  |
| M0013 |            |          |      |     | NNNNNNNNWATGCAAATNNNW | ATAAAAAATAATAATAA-     |
| 8     | V\$OCT1_04 | 0.827269 | 1757 | (-) | NNW                   | TAATAA                 |
| M0013 |            |          |      |     | NNNNNNNNWATGCAAATNNNW | AAAAAATAATAATAATAA-    |
| 8     | V\$OCT1_04 | 0.819322 | 1759 | (+) | NNW                   | TAAAA                  |
| M0013 |            |          |      |     | NNNNNNNNWATGCAAATNNNW | AAAAATAATAATAATAA-     |
| 8     | V\$OCT1_04 | 0.814722 | 1760 | (-) | NNW                   | TAAAAA                 |
| M0013 |            |          |      |     |                       |                        |
| 7     | V\$OCT1_03 | 0.878704 | 1761 | (+) | NNNRTAATNANNN         | AAAATAATAATAA          |
| M0013 |            |          |      |     | NNNNNNNNWATGCAAATNNNW | AAATAATAATAATAA-       |
| 8     | V\$OCT1_04 | 0.816604 | 1762 | (+) | NNW                   | TAAAAAAG               |
| M0013 |            |          |      |     | NNNNNNNNWATGCAAATNNNW | AATAATAATAATAA-        |
| 8     | V\$OCT1_04 | 0.813258 | 1763 | (-) | NNW                   | TAAAAAAGT              |
| M0013 |            |          |      |     |                       |                        |
| 7     | V\$OCT1_03 | 0.899644 | 1764 | (+) | NNNRTAATNANNN         | ATAATAATAATAA          |
| M0013 |            |          |      |     | NNNNNNNNWATGCAAATNNNW | TAATAATAATAA-          |
| 8     | V\$OCT1_04 | 0.791092 | 1765 | (+) | NNW                   | TAAAAAAGTAA            |
| M0013 |            |          |      |     |                       |                        |
| 7     | V\$OCT1_03 | 0.899644 | 1767 | (+) | NNNRTAATNANNN         | ATAATAATAATAA          |
| M0013 |            |          |      |     | NNNNNNNNWATGCAAATNNNW | TAATAATAA-             |
| 8     | V\$OCT1_04 | 0.859682 | 1768 | (+) | NNW                   | TAAAAAAGTAAAGA         |
| M0013 |            |          |      |     |                       |                        |
| 7     | V\$OCT1_03 | 0.880284 | 1770 | (+) | NNNRTAATNANNN         | ATAATAATAAAAA          |

|       |            |          |      |     |                       |                      |
|-------|------------|----------|------|-----|-----------------------|----------------------|
| M0019 |            |          |      |     |                       |                      |
| 5     | V\$OCT1_Q6 | 0.809225 | 1778 | (+) | NNNNATGCAAATNAN       | AAAAAAGTAAAGAAT      |
| M0016 |            |          |      |     |                       |                      |
| 2     | V\$OCT1_06 | 0.821094 | 1779 | (-) | CWNAWTKWSATRYN        | AAAAAGTAAAGAAT       |
| M0016 |            |          |      |     |                       |                      |
| 2     | V\$OCT1_06 | 0.860547 | 1804 | (-) | CWNAWTKWSATRYN        | GGTATCAAACAATG       |
| M0016 |            |          |      |     |                       |                      |
| 2     | V\$OCT1_06 | 0.9375   | 1826 | (-) | CWNAWTKWSATRYN        | AGCATCAAAGAATG       |
| M0016 |            |          |      |     |                       |                      |
| 2     | V\$OCT1_06 | 0.883984 | 1833 | (+) | CWNAWTKWSATRYN        | AAGAATGACATGAA       |
| M0016 |            |          |      |     |                       |                      |
| 2     | V\$OCT1_06 | 0.9375   | 1834 | (-) | CWNAWTKWSATRYN        | AGAATGACATGAAG       |
| M0013 |            |          |      |     | NNNNNNNNWATGCAAATNNNW | TTACAGAATTAGCGTATTT- |
| 8     | V\$OCT1_04 | 0.833542 | 1865 | (-) | NNW                   | GTAA                 |
| M0013 |            |          |      |     |                       |                      |
| 5     | V\$OCT1_01 | 0.838039 | 1867 | (-) | NNNNWTATGCAAATNTNNN   | ACAGAATTAGCGTATTTGT  |
| M0016 |            |          |      |     |                       |                      |
| 1     | V\$OCT1_05 | 0.903702 | 1869 | (+) | MKNATTTGCATAYY        | AGAATTAGCGTATT       |
| M0019 |            |          |      |     |                       |                      |
| 5     | V\$OCT1_Q6 | 0.800491 | 1869 | (-) | NNNNATGCAAATNAN       | AGAATTAGCGTATTT      |
| M0024 |            |          |      |     |                       |                      |
| 8     | V\$OCT1_07 | 0.877888 | 1871 | (-) | TNTATGNTAATT          | AATTAGCGTATT         |
| M0013 |            |          |      |     |                       |                      |
| 5     | V\$OCT1_01 | 0.74132  | 1875 | (-) | NNNNWTATGCAAATNTNNN   | AGCGTATTTGTAAACATAT  |
| M0019 |            |          |      |     |                       |                      |
| 5     | V\$OCT1_Q6 | 0.824782 | 1877 | (-) | NNNNATGCAAATNAN       | CGTATTTGTAAACAT      |
| M0013 |            |          |      |     |                       |                      |
| 7     | V\$OCT1_03 | 0.888977 | 1881 | (+) | NNNRTAATNANNN         | TTTGTAACATAT         |
| M0016 |            |          |      |     |                       |                      |
| 2     | V\$OCT1_06 | 0.813281 | 1893 | (-) | CWNAWTKWSATRYN        | TGTGTCCAATGTAT       |
| M0016 |            |          |      |     |                       |                      |
| 2     | V\$OCT1_06 | 0.855078 | 1902 | (-) | CWNAWTKWSATRYN        | TGTATGTCTTTACC       |
| M0013 |            |          |      |     |                       |                      |
| 7     | V\$OCT1_03 | 0.900435 | 1905 | (-) | NNNRTAATNANNN         | ATGTCTTTACCAA        |
| M0016 |            |          |      |     |                       |                      |
| 2     | V\$OCT1_06 | 0.873437 | 1917 | (-) | CWNAWTKWSATRYN        | AATATAACATAAAG       |
| M0024 |            |          |      |     |                       |                      |
| 8     | V\$OCT1_07 | 0.792453 | 1918 | (-) | TNTATGNTAATT          | ATATAACATAAA         |
| M0016 |            |          |      |     |                       |                      |
| 2     | V\$OCT1_06 | 0.813672 | 1934 | (-) | CWNAWTKWSATRYN        | TATAGTCCAGTATT       |
| M0013 |            |          |      |     |                       |                      |
| 5     | V\$OCT1_01 | 0.783098 | 2028 | (+) | NNNNWTATGCAAATNTNNN   | CTCATTCTGCTGATTIGGA  |
| M0013 |            |          |      |     |                       |                      |
| 5     | V\$OCT1_01 | 0.750858 | 2035 | (-) | NNNNWTATGCAAATNTNNN   | TGCTGATTTGGAGATTGAA  |
| M0016 |            |          |      |     |                       |                      |
| 2     | V\$OCT1_06 | 0.844922 | 2037 | (+) | CWNAWTKWSATRYN        | CTGATTTGGAGATT       |
| M0019 |            |          |      |     |                       |                      |
| 5     | V\$OCT1_Q6 | 0.823144 | 2037 | (-) | NNNNATGCAAATNAN       | CTGATTTGGAGATTG      |
| M0016 |            |          |      |     |                       |                      |
| 2     | V\$OCT1_06 | 0.842187 | 2045 | (+) | CWNAWTKWSATRYN        | GAGATTGAATTGTT       |
| M0016 |            |          |      |     |                       |                      |
| 2     | V\$OCT1_06 | 0.804297 | 2077 | (+) | CWNAWTKWSATRYN        | TGAAATTAGATAAT       |
| M0016 |            |          |      |     |                       |                      |
| 2     | V\$OCT1_06 | 0.834766 | 2078 | (-) | CWNAWTKWSATRYN        | GAAATTAGATAATG       |
| M0013 |            |          |      |     | NNNNNNNNWATGCAAATNNNW | ATTAGA-              |
| 8     | V\$OCT1_04 | 0.916562 | 2081 | (+) | NNW                   | TAATGTAAATTAAAAATA   |
| M0013 |            |          |      |     |                       |                      |
| 5     | V\$OCT1_01 | 0.790538 | 2083 | (+) | NNNNWTATGCAAATNTNNN   | TAGATAATGTAAATTAATA  |
| M0013 |            |          |      |     |                       |                      |
| 7     | V\$OCT1_03 | 0.854208 | 2083 | (+) | NNNRTAATNANNN         | TAGATAATGTAAA        |
| M0016 |            |          |      |     |                       |                      |
| 2     | V\$OCT1_06 | 0.834375 | 2085 | (+) | CWNAWTKWSATRYN        | GATAATGTAAATTA       |
| M0019 |            |          |      |     |                       |                      |
| 5     | V\$OCT1_Q6 | 0.865721 | 2085 | (+) | NNNNATGCAAATNAN       | GATAATGTAAATTAA      |
| M0016 |            |          |      |     |                       |                      |
| 2     | V\$OCT1_06 | 0.804297 | 2086 | (-) | CWNAWTKWSATRYN        | ATAATGTAAATTAA       |

|       |            |          |      |     |                       |                      |
|-------|------------|----------|------|-----|-----------------------|----------------------|
| M0024 |            |          |      |     |                       |                      |
| 8     | V\$OCT1_07 | 0.891032 | 2086 | (+) | TNTATGNTAATT          | ATAATGTAAATT         |
| M0013 |            |          |      |     | NNNNNNNNWATGCAAATNNNW | TAATGTAAATTAAAA-     |
| 8     | V\$OCT1_04 | 0.81514  | 2087 | (+) | NNW                   | TAACCCCTT            |
| M0013 |            |          |      |     | NNNNNNNNWATGCAAATNNNW | AATGTAAATTAAAA-      |
| 8     | V\$OCT1_04 | 0.823296 | 2088 | (-) | NNW                   | TAACCCCTC            |
| M0013 |            |          |      |     |                       |                      |
| 5     | V\$OCT1_01 | 0.771461 | 2090 | (-) | NNNNWTATGCAAATNTNNN   | TGTAAATTAAAAATAACCTT |
| M0019 |            |          |      |     |                       |                      |
| 5     | V\$OCT1_Q6 | 0.830786 | 2091 | (+) | NNNNATGCAAATNAN       | GTAAATTAAAAATAAC     |
| M0016 |            |          |      |     |                       |                      |
| 2     | V\$OCT1_06 | 0.908984 | 2092 | (-) | CWNAWKWSATRYN         | TAAATTAAAAATAAC      |
| M0013 |            |          |      |     | NNNNNNNNWATGCAAATNNNW | AATTAAAA-            |
| 8     | V\$OCT1_04 | 0.781681 | 2094 | (-) | NNW                   | TAACCCCTTCTCAAAA     |
| M0024 |            |          |      |     |                       |                      |
| 8     | V\$OCT1_07 | 0.896544 | 2094 | (-) | TNTATGNTAATT          | AATTAAAAATAAC        |
| M0013 |            |          |      |     |                       |                      |
| 6     | V\$OCT1_02 | 0.839469 | 2126 | (+) | NNGAATATKCANNNN       | AAAACCTATTCAGTTA     |
| M0013 |            |          |      |     |                       |                      |
| 5     | V\$OCT1_01 | 0.790538 | 2135 | (-) | NNNNWTATGCAAATNTNNN   | CAGTTACTTACATAAAGCA  |
| M0016 |            |          |      |     |                       |                      |
| 2     | V\$OCT1_06 | 0.860547 | 2137 | (+) | CWNAWKWSATRYN         | GTTACTTACATAAA       |
| M0019 |            |          |      |     |                       |                      |
| 5     | V\$OCT1_Q6 | 0.804858 | 2137 | (-) | NNNNATGCAAATNAN       | GTTACTTACATAAAG      |
| M0016 |            |          |      |     |                       |                      |
| 2     | V\$OCT1_06 | 0.800391 | 2147 | (-) | CWNAWKWSATRYN         | TAAAGCAAAAAGTT       |
| M0016 |            |          |      |     |                       |                      |
| 2     | V\$OCT1_06 | 0.804297 | 2152 | (+) | CWNAWKWSATRYN         | CAAAAAGTTATTCT       |
| M0013 |            |          |      |     |                       |                      |
| 7     | V\$OCT1_03 | 0.888186 | 2201 | (+) | NNNRTAATNANNN         | GGAGTAAACAGGA        |
| M0013 |            |          |      |     | NNNNNNNNWATGCAAATNNNW | AGAAAACAATTGAGA-     |
| 8     | V\$OCT1_04 | 0.821205 | 2225 | (+) | NNW                   | TAAAATAA             |
| M0024 |            |          |      |     |                       |                      |
| 8     | V\$OCT1_07 | 0.799237 | 2232 | (-) | TNTATGNTAATT          | AATTCAGATAAA         |
| M0016 |            |          |      |     |                       |                      |
| 2     | V\$OCT1_06 | 0.808594 | 2248 | (+) | CWNAWKWSATRYN         | TGGTCTTGGATGCT       |
| M0013 |            |          |      |     |                       |                      |
| 5     | V\$OCT1_01 | 0.739985 | 2254 | (-) | NNNNWTATGCAAATNTNNN   | TGGATGCTTGGATATTGAA  |
| M0016 |            |          |      |     |                       |                      |
| 2     | V\$OCT1_06 | 0.834375 | 2256 | (+) | CWNAWKWSATRYN         | GATGCTTGGATATT       |
| M0013 |            |          |      |     |                       |                      |
| 6     | V\$OCT1_02 | 0.841094 | 2258 | (-) | NNGAATATKCANNNN       | TGCTTGGATATTGAA      |
| M0013 |            |          |      |     |                       |                      |
| 6     | V\$OCT1_02 | 0.771792 | 2261 | (+) | NNGAATATKCANNNN       | TTGGATATTGAAACT      |
| M0016 |            |          |      |     |                       |                      |
| 2     | V\$OCT1_06 | 0.829297 | 2272 | (+) | CWNAWKWSATRYN         | AACTATCAAATACA       |
| M0016 |            |          |      |     |                       |                      |
| 2     | V\$OCT1_06 | 0.852734 | 2273 | (-) | CWNAWKWSATRYN         | ACTATCAAATACAG       |
| M0016 |            |          |      |     |                       |                      |
| 2     | V\$OCT1_06 | 0.817187 | 2278 | (+) | CWNAWKWSATRYN         | CAAATACAGATGCA       |
| M0013 |            |          |      |     | NNNNNNNNWATGCAAATNNNW | AAATACAGATGCAAGTTCTG |
| 8     | V\$OCT1_04 | 0.815767 | 2279 | (+) | NNW                   | AA                   |
| M0013 |            |          |      |     |                       |                      |
| 5     | V\$OCT1_01 | 0.824685 | 2281 | (+) | NNNNWTATGCAAATNTNNN   | ATACAGATGCAAGTTCTG   |
| M0016 |            |          |      |     |                       |                      |
| 2     | V\$OCT1_06 | 0.842578 | 2284 | (-) | CWNAWKWSATRYN         | CAGATGCAAGTTTC       |
| M0016 |            |          |      |     |                       |                      |
| 2     | V\$OCT1_06 | 0.898437 | 2293 | (+) | CWNAWKWSATRYN         | GTTTCTGAAATGCT       |
| M0016 |            |          |      |     |                       |                      |
| 2     | V\$OCT1_06 | 0.855078 | 2301 | (+) | CWNAWKWSATRYN         | AATGCTGAGATACT       |
| M0016 |            |          |      |     |                       |                      |
| 2     | V\$OCT1_06 | 0.813672 | 2313 | (+) | CWNAWKWSATRYN         | CTCTATTGGACTCT       |
| M0016 |            |          |      |     |                       |                      |
| 2     | V\$OCT1_06 | 0.842187 | 2320 | (-) | CWNAWKWSATRYN         | GGACTCTAATTTTC       |
| M0013 |            |          |      |     | NNNNNNNNWATGCAAATNNNW | ACTCTAATTTTCTA-      |
| 8     | V\$OCT1_04 | 0.83187  | 2322 | (-) | NNW                   | TATCCATAT            |

|       |            |          |      |     |                      |                       |
|-------|------------|----------|------|-----|----------------------|-----------------------|
| M0013 |            |          |      |     |                      |                       |
| 5     | V\$OCT1_01 | 0.749523 | 2324 | (-) | NNNNWTATGCAAATNTNNN  | TCTAATTTTCTATATCCAT   |
| M0013 |            |          |      |     | NNNNNNNWATGCAAATNNNW | TCTAATTTTCTA-         |
| 8     | V\$OCT1_04 | 0.788582 | 2324 | (-) | NNW                  | TATCCATATTT           |
| M0013 |            |          |      |     | NNNNNNNWATGCAAATNNNW | ATTTTCTATATCCATATTTA- |
| 8     | V\$OCT1_04 | 0.823505 | 2328 | (-) | NNW                  | GAA                   |
| M0013 |            |          |      |     | NNNNNNNWATGCAAATNNNW | TTTTCTATATCCATATTTA-  |
| 8     | V\$OCT1_04 | 0.810121 | 2329 | (+) | NNW                  | GAAA                  |
| M0013 |            |          |      |     |                      |                       |
| 5     | V\$OCT1_01 | 0.780427 | 2330 | (-) | NNNNWTATGCAAATNTNNN  | TTTCTATATCCATATTTAG   |
| M0013 |            |          |      |     |                      |                       |
| 5     | V\$OCT1_01 | 0.787867 | 2331 | (+) | NNNNWTATGCAAATNTNNN  | TTCTATATCCATATTTAGA   |
| M0013 |            |          |      |     |                      |                       |
| 6     | V\$OCT1_02 | 0.77098  | 2331 | (+) | NNGAATATKCANNNN      | TTCTATATCCATATT       |
| M0013 |            |          |      |     |                      |                       |
| 6     | V\$OCT1_02 | 0.796697 | 2334 | (-) | NNGAATATKCANNNN      | TATATCCATATTTAG       |
| M0013 |            |          |      |     |                      |                       |
| 6     | V\$OCT1_02 | 0.783433 | 2337 | (+) | NNGAATATKCANNNN      | ATCCATATTTAGAAA       |
| M0013 |            |          |      |     |                      |                       |
| 5     | V\$OCT1_01 | 0.735025 | 2338 | (-) | NNNNWTATGCAAATNTNNN  | TCCATATTTAGAAAATGCA   |
| M0016 |            |          |      |     |                      |                       |
| 2     | V\$OCT1_06 | 0.809375 | 2340 | (+) | CWNAWKWSATRYN        | CATATTTAGAAAAT        |
| M0016 |            |          |      |     |                      |                       |
| 2     | V\$OCT1_06 | 0.800391 | 2340 | (-) | CWNAWKWSATRYN        | CATATTTAGAAAAT        |
| M0013 |            |          |      |     |                      |                       |
| 6     | V\$OCT1_02 | 0.850839 | 2346 | (+) | NNGAATATKCANNNN      | TAGAAAATGCAGGAT       |
| M0013 |            |          |      |     |                      |                       |
| 7     | V\$OCT1_03 | 0.858159 | 2396 | (-) | NNNRTAATNANNN        | TTTTGTTTATGCT         |
| M0013 |            |          |      |     | NNNNNNNWATGCAAATNNNW | TTTTGTTTATGC-         |
| 8     | V\$OCT1_04 | 0.782518 | 2396 | (+) | NNW                  | TACACCCTAAA           |
| M0013 |            |          |      |     |                      |                       |
| 5     | V\$OCT1_01 | 0.759252 | 2398 | (+) | NNNNWTATGCAAATNTNNN  | TTGTTTATGCTACACCCTA   |
| M0016 |            |          |      |     |                      |                       |
| 2     | V\$OCT1_06 | 0.800781 | 2431 | (-) | CWNAWKWSATRYN        | GAAATCTCTGACAG        |
| M0013 |            |          |      |     | NNNNNNNWATGCAAATNNNW | AGTAAGTTACAAAAA-      |
| 8     | V\$OCT1_04 | 0.781472 | 2443 | (+) | NNW                  | TAAATCCA              |
| M0016 |            |          |      |     |                      |                       |
| 2     | V\$OCT1_06 | 0.812109 | 2452 | (+) | CWNAWKWSATRYN        | CAAAAATAAATCCA        |
| M0016 |            |          |      |     |                      |                       |
| 2     | V\$OCT1_06 | 0.870312 | 2458 | (-) | CWNAWKWSATRYN        | TAAATCCAAGTCCT        |
| M0013 |            |          |      |     | NNNNNNNWATGCAAATNNNW | TTGTTCTTTACAAATGAAAT  |
| 8     | V\$OCT1_04 | 0.783563 | 2503 | (+) | NNW                  | GG                    |
| M0016 |            |          |      |     |                      |                       |
| 2     | V\$OCT1_06 | 0.816406 | 2514 | (-) | CWNAWKWSATRYN        | CAAATGAAATGGGT        |
| M0024 |            |          |      |     |                      |                       |
| 8     | V\$OCT1_07 | 0.792453 | 2605 | (-) | TNTATGNTAATT         | AACAAACATAAA          |
| M0016 |            |          |      |     |                      |                       |
| 2     | V\$OCT1_06 | 0.847656 | 2607 | (+) | CWNAWKWSATRYN        | CAACATAAAATTTT        |
| M0013 |            |          |      |     | NNNNNNNWATGCAAATNNNW | CAGTTAAAATGAAGATTGA-  |
| 8     | V\$OCT1_04 | 0.793392 | 2628 | (+) | NNW                  | GATA                  |
| M0013 |            |          |      |     |                      |                       |
| 6     | V\$OCT1_02 | 0.798863 | 2633 | (-) | NNGAATATKCANNNN      | AAAATGAAGATTGAG       |
| M0013 |            |          |      |     | NNNNNNNWATGCAAATNNNW | AAATGAAGATTGAGA-      |
| 8     | V\$OCT1_04 | 0.795483 | 2634 | (+) | NNW                  | TAAATTTT              |
| M0016 |            |          |      |     |                      |                       |
| 2     | V\$OCT1_06 | 0.860547 | 2639 | (+) | CWNAWKWSATRYN        | AAGATTGAGATAAA        |
| M0013 |            |          |      |     | NNNNNNNWATGCAAATNNNW | GATAAAATTTTGTATGAT-   |
| 8     | V\$OCT1_04 | 0.783354 | 2647 | (-) | NNW                  | TTAAT                 |
| M0013 |            |          |      |     |                      |                       |
| 5     | V\$OCT1_01 | 0.735406 | 2649 | (-) | NNNNWTATGCAAATNTNNN  | TAAATTTTGTATGATTTA    |
| M0013 |            |          |      |     |                      |                       |
| 6     | V\$OCT1_02 | 0.776665 | 2680 | (+) | NNGAATATKCANNNN      | AATAAAATCCAGACA       |
| M0016 |            |          |      |     |                      |                       |
| 2     | V\$OCT1_06 | 0.834766 | 2697 | (+) | CWNAWKWSATRYN        | CAACATTTAATTAG        |
| M0016 |            |          |      |     |                      |                       |
| 2     | V\$OCT1_06 | 0.902344 | 2698 | (-) | CWNAWKWSATRYN        | AACATTTAATTAGG        |



|       |            |          |      |     |                      |                       |
|-------|------------|----------|------|-----|----------------------|-----------------------|
| M0013 |            |          |      |     | NNNNNNNWATGCAAATNNNW | ACATTTAATTAG-         |
| 8     | V\$OCT1_04 | 0.79632  | 2699 | (-) | NNW                  | GAAAAGTATAC           |
| M0013 |            |          |      |     |                      |                       |
| 7     | V\$OCT1_03 | 0.864085 | 2700 | (+) | NNNRTAATNANNN        | CATTTAATTAGGA         |
| M0013 |            |          |      |     |                      |                       |
| 7     | V\$OCT1_03 | 0.894903 | 2701 | (-) | NNNRTAATNANNN        | ATTTAATTAGGAA         |
| M0013 |            |          |      |     | NNNNNNNWATGCAAATNNNW | ATTTAATTAGGAAAAGTATA- |
| 8     | V\$OCT1_04 | 0.818904 | 2701 | (+) | NNW                  | CAT                   |
| M0013 |            |          |      |     |                      |                       |
| 7     | V\$OCT1_03 | 0.88068  | 2737 | (+) | NNNRTAATNANNN        | TGTATAATGGTTT         |
| M0024 |            |          |      |     |                      |                       |
| 8     | V\$OCT1_07 | 0.839093 | 2764 | (-) | TNTATGNTAATT         | AACTACCATGTA          |
| M0016 |            |          |      |     |                      |                       |
| 2     | V\$OCT1_06 | 0.842187 | 2767 | (+) | CWNAWKWSATRYN        | TACCATGTAATATA        |
| M0016 |            |          |      |     |                      |                       |
| 2     | V\$OCT1_06 | 0.806641 | 2768 | (-) | CWNAWKWSATRYN        | ACCATGTAATATAA        |
| M0013 |            |          |      |     | NNNNNNNWATGCAAATNNNW | CCATGTAATATAAAATT-    |
| 8     | V\$OCT1_04 | 0.810749 | 2769 | (-) | NNW                  | GTTCAGA               |
| M0016 |            |          |      |     |                      |                       |
| 2     | V\$OCT1_06 | 0.813672 | 2790 | (-) | CWNAWKWSATRYN        | GAAAATAAATCAT         |
| M0013 |            |          |      |     | NNNNNNNWATGCAAATNNNW | TCATTCTTTATCATTCTG-   |
| 8     | V\$OCT1_04 | 0.792137 | 2800 | (-) | NNW                  | GATT                  |
| M0013 |            |          |      |     |                      |                       |
| 7     | V\$OCT1_03 | 0.868827 | 2802 | (-) | NNNRTAATNANNN        | ATTTCTTTATCAT         |
| M0016 |            |          |      |     |                      |                       |
| 2     | V\$OCT1_06 | 0.813281 | 2852 | (+) | CWNAWKWSATRYN        | GTTTTTTGAAGTC         |
| M0013 |            |          |      |     |                      |                       |
| 5     | V\$OCT1_01 | 0.752194 | 2862 | (-) | NNNNWTATGCAAATNTNNN  | AGTCTTTTTACATAGTTTT   |
| M0016 |            |          |      |     |                      |                       |
| 2     | V\$OCT1_06 | 0.834375 | 2912 | (+) | CWNAWKWSATRYN        | AATAATTTACTTTT        |
| M0016 |            |          |      |     |                      |                       |
| 2     | V\$OCT1_06 | 0.847266 | 2913 | (+) | CWNAWKWSATRYN        | ATAATTTACTTTTT        |
| M0019 |            |          |      |     |                      |                       |
| 5     | V\$OCT1_Q6 | 0.802675 | 2913 | (-) | NNNNATGCAAATNAN      | ATAATTTACTTTTTA       |
| M0024 |            |          |      |     |                      |                       |
| 8     | V\$OCT1_07 | 0.793089 | 2915 | (-) | TNTATGNTAATT         | AATTTACTTTTT          |
| M0013 |            |          |      |     | NNNNNNNWATGCAAATNNNW | ATTTACTTTTTAAATTTTT-  |
| 8     | V\$OCT1_04 | 0.794437 | 2916 | (-) | NNW                  | GTCA                  |
| M0016 |            |          |      |     |                      |                       |
| 2     | V\$OCT1_06 | 0.821484 | 2920 | (+) | CWNAWKWSATRYN        | ACTTTTTAAATTTT        |
| M0024 |            |          |      |     |                      |                       |
| 8     | V\$OCT1_07 | 0.793301 | 2920 | (+) | TNTATGNTAATT         | ACTTTTTAAATT          |
| M0013 |            |          |      |     | NNNNNNNWATGCAAATNNNW | TTTTTAAATTTTTGTCAA-   |
| 8     | V\$OCT1_04 | 0.798829 | 2922 | (-) | NNW                  | TAAAA                 |
| M0013 |            |          |      |     | NNNNNNNWATGCAAATNNNW | TTAAATTTTTGTCAATAAAA- |
| 8     | V\$OCT1_04 | 0.786491 | 2925 | (+) | NNW                  | TAT                   |
| M0016 |            |          |      |     |                      |                       |
| 2     | V\$OCT1_06 | 0.847656 | 2935 | (+) | CWNAWKWSATRYN        | GTCAATAAAATATA        |
| M0016 |            |          |      |     |                      |                       |
| 2     | V\$OCT1_06 | 0.873437 | 2980 | (+) | CWNAWKWSATRYN        | CAGATTAGCTATT         |
| M0013 |            |          |      |     | NNNNNNNWATGCAAATNNNW | ATTAGC-               |
| 8     | V\$OCT1_04 | 0.852781 | 2983 | (+) | NNW                  | TATTAATAACAAACT       |
| M0013 |            |          |      |     | NNNNNNNWATGCAAATNNNW | TTTAGC-               |
| 8     | V\$OCT1_04 | 0.793392 | 2984 | (-) | NNW                  | TATTAATAACAAACTT      |
| M0013 |            |          |      |     | NNNNNNNWATGCAAATNNNW | CTATTAATAACAAACTTTTC  |
| 8     | V\$OCT1_04 | 0.785655 | 2989 | (+) | NNW                  | TT                    |
| M0024 |            |          |      |     |                      |                       |
| 8     | V\$OCT1_07 | 0.836549 | 2990 | (-) | TNTATGNTAATT         | TATTAATAACA           |
| M0016 |            |          |      |     |                      |                       |
| 2     | V\$OCT1_06 | 0.932422 | 3018 | (+) | CWNAWKWSATRYN        | CAACATTAAATTCA        |
| M0016 |            |          |      |     |                      |                       |
| 2     | V\$OCT1_06 | 0.924609 | 3019 | (-) | CWNAWKWSATRYN        | AACATTAAATTCAT        |
| M0013 |            |          |      |     | NNNNNNNWATGCAAATNNNW | TAGTATTA-             |
| 8     | V\$OCT1_04 | 0.788373 | 3032 | (-) | NNW                  | TATGTATATTGTGAT       |
| M0016 |            |          |      |     |                      |                       |
| 2     | V\$OCT1_06 | 0.801562 | 3032 | (+) | CWNAWKWSATRYN        | TAGTATTATATGTA        |

|       |            |          |      |     |                      |                        |
|-------|------------|----------|------|-----|----------------------|------------------------|
| M0016 |            |          |      |     |                      |                        |
| 2     | V\$OCT1_06 | 0.826562 | 3033 | (-) | CWNAWTKWSATRYN       | AGTATTATATGTAT         |
| M0013 |            |          |      |     |                      |                        |
| 5     | V\$OCT1_01 | 0.735597 | 3034 | (-) | NNNNWTATGCAAATNTNNN  | GTATTATATGTATATTGTG    |
| M0013 |            |          |      |     |                      |                        |
| 5     | V\$OCT1_01 | 0.755246 | 3035 | (+) | NNNNWTATGCAAATNTNNN  | TATTATATGTATATTGTGA    |
| M0013 |            |          |      |     |                      |                        |
| 6     | V\$OCT1_02 | 0.818896 | 3038 | (-) | NNGAATATKCANNNN      | TATATGTATATTGTG        |
| M0024 |            |          |      |     |                      |                        |
| 8     | V\$OCT1_07 | 0.866441 | 3038 | (+) | TNTATGNTAATT         | TATATGTATATT           |
| M0013 |            |          |      |     | NNNNNNNWATGCAAATNNNW | ATATGTATATTGTGATCTTAT- |
| 8     | V\$OCT1_04 | 0.793392 | 3039 | (+) | NNW                  | TA                     |
| M0016 |            |          |      |     |                      |                        |
| 2     | V\$OCT1_06 | 0.817187 | 3044 | (+) | CWNAWTKWSATRYN       | TATATTGTGATCTT         |
| M0013 |            |          |      |     |                      |                        |
| 7     | V\$OCT1_03 | 0.916239 | 3053 | (-) | NNNRTAATNANNN        | ATCTTATTATTAT          |
| M0013 |            |          |      |     |                      |                        |
| 7     | V\$OCT1_03 | 0.873568 | 3056 | (-) | NNNRTAATNANNN        | TTATTATTATTGT          |
| M0016 |            |          |      |     |                      |                        |
| 2     | V\$OCT1_06 | 0.805859 | 3061 | (+) | CWNAWTKWSATRYN       | ATTATTGTACTTTG         |
| M0024 |            |          |      |     |                      |                        |
| 8     | V\$OCT1_07 | 0.815137 | 3061 | (+) | TNTATGNTAATT         | ATTATTGTACTT           |
| M0016 |            |          |      |     |                      |                        |
| 2     | V\$OCT1_06 | 0.800391 | 3067 | (+) | CWNAWTKWSATRYN       | GTACTTTGATTGCT         |
| M0016 |            |          |      |     |                      |                        |
| 2     | V\$OCT1_06 | 0.809375 | 3092 | (+) | CWNAWTKWSATRYN       | TTTATTGTTATATA         |
| M0013 |            |          |      |     | NNNNNNNWATGCAAATNNNW | TGCTTTGTTTTTCACAGAAA-  |
| 8     | V\$OCT1_04 | 0.807821 | 3111 | (-) | NNW                  | TAT                    |
| M0013 |            |          |      |     |                      |                        |
| 6     | V\$OCT1_02 | 0.782079 | 3126 | (+) | NNGAATATKCANNNN      | AGAAATATCCTCTCA        |
| M0016 |            |          |      |     |                      |                        |
| 2     | V\$OCT1_06 | 0.803125 | 3150 | (+) | CWNAWTKWSATRYN       | AAGTCTTTCAAGTG         |
| M0016 |            |          |      |     |                      |                        |
| 2     | V\$OCT1_06 | 0.855469 | 3270 | (+) | CWNAWTKWSATRYN       | CAGTTTCACATTCA         |
| M0016 |            |          |      |     |                      |                        |
| 2     | V\$OCT1_06 | 0.839453 | 3271 | (-) | CWNAWTKWSATRYN       | AGTTTCACATTAC          |
| M0013 |            |          |      |     |                      |                        |
| 6     | V\$OCT1_02 | 0.770168 | 3273 | (+) | NNGAATATKCANNNN      | TTTCACATTCACTAA        |
| M0013 |            |          |      |     |                      |                        |
| 7     | V\$OCT1_03 | 0.840379 | 3288 | (+) | NNNRTAATNANNN        | GGTATAATATCTT          |
| M0013 |            |          |      |     |                      |                        |
| 6     | V\$OCT1_02 | 0.857336 | 3314 | (-) | NNGAATATKCANNNN      | GAAGTGAATATCGAT        |
| M0013 |            |          |      |     | NNNNNNNWATGCAAATNNNW | CACATAGACTTACATAAA-    |
| 8     | V\$OCT1_04 | 0.821623 | 3359 | (-) | NNW                  | TATTT                  |
| M0013 |            |          |      |     |                      |                        |
| 5     | V\$OCT1_01 | 0.802556 | 3361 | (-) | NNNNWTATGCAAATNTNNN  | CATAGACTTACATAAATAT    |
| M0013 |            |          |      |     | NNNNNNNWATGCAAATNNNW | ATAGACTTACATAAA-       |
| 8     | V\$OCT1_04 | 0.782518 | 3362 | (+) | NNW                  | TATTTATG               |
| M0013 |            |          |      |     | NNNNNNNWATGCAAATNNNW | TAGACTTACATAAA-        |
| 8     | V\$OCT1_04 | 0.807194 | 3363 | (-) | NNW                  | TATTTATGA              |
| M0016 |            |          |      |     |                      |                        |
| 2     | V\$OCT1_06 | 0.800391 | 3364 | (-) | CWNAWTKWSATRYN       | AGACTTACATAAAT         |
| M0016 |            |          |      |     |                      |                        |
| 2     | V\$OCT1_06 | 0.852734 | 3367 | (+) | CWNAWTKWSATRYN       | CTTACATAAATATT         |
| M0013 |            |          |      |     |                      |                        |
| 6     | V\$OCT1_02 | 0.84732  | 3369 | (-) | NNGAATATKCANNNN      | TACATAAATATTTAT        |
| M0013 |            |          |      |     |                      |                        |
| 7     | V\$OCT1_03 | 0.860529 | 3369 | (+) | NNNRTAATNANNN        | TACATAAATATTT          |
| M0013 |            |          |      |     | NNNNNNNWATGCAAATNNNW | TACATAAATATTTATGAT-    |
| 8     | V\$OCT1_04 | 0.821832 | 3369 | (-) | NNW                  | TAATT                  |
| M0013 |            |          |      |     | NNNNNNNWATGCAAATNNNW | ACATAAATATTTATGAT-     |
| 8     | V\$OCT1_04 | 0.814513 | 3370 | (+) | NNW                  | TAATTA                 |
| M0013 |            |          |      |     |                      |                        |
| 6     | V\$OCT1_02 | 0.834326 | 3372 | (+) | NNGAATATKCANNNN      | ATAAATATTTATGAT        |
| M0013 |            |          |      |     | NNNNNNNWATGCAAATNNNW | TAAATATTTATGAT-        |
| 8     | V\$OCT1_04 | 0.780427 | 3373 | (-) | NNW                  | TAATTAATA              |

|       |            |          |      |     |                      |                       |
|-------|------------|----------|------|-----|----------------------|-----------------------|
| M0013 |            |          |      |     |                      |                       |
| 7     | V\$OCT1_03 | 0.868036 | 3374 | (-) | NNNRTAATNANNN        | AAATATTTATGAT         |
| M0013 |            |          |      |     | NNNNNNNWATGCAAATNNNW | AAATATTTATGATTAATTAA- |
| 8     | V\$OCT1_04 | 0.812631 | 3374 | (+) | NNW                  | TAC                   |
| M0013 |            |          |      |     |                      |                       |
| 7     | V\$OCT1_03 | 0.849862 | 3380 | (-) | NNNRTAATNANNN        | TTATGATTAATTA         |
| M0016 |            |          |      |     |                      |                       |
| 2     | V\$OCT1_06 | 0.808203 | 3384 | (+) | CWNAWTKWSATRYN       | GATTAATTAATACC        |
| M0013 |            |          |      |     |                      |                       |
| 7     | V\$OCT1_03 | 0.930067 | 3395 | (-) | NNNRTAATNANNN        | ACCTTATTATTCA         |
| M0013 |            |          |      |     |                      |                       |
| 5     | V\$OCT1_01 | 0.754101 | 3397 | (+) | NNNNWTATGCAAATNTNNN  | CTTATTATTCAAGTGCAAT   |
| M0013 |            |          |      |     |                      |                       |
| 6     | V\$OCT1_02 | 0.851651 | 3397 | (+) | NNGAATATKCANNNN      | CTTATTATTCAAGTG       |
| M0013 |            |          |      |     |                      |                       |
| 6     | V\$OCT1_02 | 0.777477 | 3420 | (+) | NNGAATATKCANNNN      | AAGGATATGTTAGCA       |
| M0013 |            |          |      |     | NNNNNNNWATGCAAATNNNW | AGGATATGTTAGCATGAT-   |
| 8     | V\$OCT1_04 | 0.808867 | 3421 | (-) | NNW                  | TTATT                 |
| M0013 |            |          |      |     |                      |                       |
| 5     | V\$OCT1_01 | 0.758489 | 3423 | (-) | NNNNWTATGCAAATNTNNN  | GATATGTTAGCATGATTTA   |
| M0013 |            |          |      |     | NNNNNNNWATGCAAATNNNW | CATGAT-               |
| 8     | V\$OCT1_04 | 0.792137 | 3433 | (+) | NNW                  | TTATTTTAAATTATTAT     |
| M0013 |            |          |      |     | NNNNNNNWATGCAAATNNNW | TGAT-                 |
| 8     | V\$OCT1_04 | 0.875575 | 3435 | (-) | NNW                  | TTATTTTAAATTATTATTG   |
| M0024 |            |          |      |     |                      |                       |
| 8     | V\$OCT1_07 | 0.831673 | 3438 | (+) | TNTATGNTAATT         | TTATTTTAAAT           |
| M0016 |            |          |      |     |                      |                       |
| 2     | V\$OCT1_06 | 0.847266 | 3440 | (-) | CWNAWTKWSATRYN       | TATTTTAAATTATT        |
| M0013 |            |          |      |     |                      |                       |
| 7     | V\$OCT1_03 | 0.88147  | 3446 | (-) | NNNRTAATNANNN        | AAATTATTATTGC         |
| M0013 |            |          |      |     | NNNNNNNWATGCAAATNNNW | CTCTTTACTT-           |
| 8     | V\$OCT1_04 | 0.806357 | 3469 | (-) | NNW                  | GCATTCAAACAT          |
| M0016 |            |          |      |     |                      |                       |
| 2     | V\$OCT1_06 | 0.855078 | 3469 | (+) | CWNAWTKWSATRYN       | CTCTTTACTTGCA         |
| M0013 |            |          |      |     |                      |                       |
| 5     | V\$OCT1_01 | 0.731209 | 3471 | (-) | NNNNWTATGCAAATNTNNN  | CTTTACTTGCAATTCAAAC   |
| M0016 |            |          |      |     |                      |                       |
| 2     | V\$OCT1_06 | 0.847656 | 3473 | (+) | CWNAWTKWSATRYN       | TTACTTGCAATTCA        |
| M0019 |            |          |      |     |                      |                       |
| 5     | V\$OCT1_Q6 | 0.796124 | 3473 | (-) | NNNNATGCAAATNAN      | TTACTTGCAATTCAA       |
| M0013 |            |          |      |     | NNNNNNNWATGCAAATNNNW | TTACTTGCAATTCAAACATA- |
| 8     | V\$OCT1_04 | 0.789628 | 3474 | (+) | NNW                  | TAAT                  |
| M0016 |            |          |      |     |                      |                       |
| 2     | V\$OCT1_06 | 0.808594 | 3486 | (+) | CWNAWTKWSATRYN       | AAACATATAATTTG        |
| M0016 |            |          |      |     |                      |                       |
| 2     | V\$OCT1_06 | 0.819922 | 3487 | (-) | CWNAWTKWSATRYN       | AACATATAATTTGC        |
| M0013 |            |          |      |     | NNNNNNNWATGCAAATNNNW | ACATATAATTTGCAATTT-   |
| 8     | V\$OCT1_04 | 0.804266 | 3488 | (-) | NNW                  | GCTCT                 |
| M0013 |            |          |      |     |                      |                       |
| 5     | V\$OCT1_01 | 0.781    | 3490 | (-) | NNNNWTATGCAAATNTNNN  | ATATAATTTGCAATTTGCT   |
| M0013 |            |          |      |     |                      |                       |
| 5     | V\$OCT1_01 | 0.745326 | 3491 | (+) | NNNNWTATGCAAATNTNNN  | TATAATTTGCAATTTGCTC   |
| M0013 |            |          |      |     |                      |                       |
| 6     | V\$OCT1_02 | 0.787764 | 3491 | (+) | NNGAATATKCANNNN      | TATAATTTGCAATTT       |
| M0016 |            |          |      |     |                      |                       |
| 1     | V\$OCT1_05 | 0.897393 | 3492 | (+) | MKNATTTGCATAYY       | ATAATTTGCAATTT        |
| M0016 |            |          |      |     |                      |                       |
| 2     | V\$OCT1_06 | 0.826562 | 3492 | (+) | CWNAWTKWSATRYN       | ATAATTTGCAATTT        |
| M0019 |            |          |      |     |                      |                       |
| 5     | V\$OCT1_Q6 | 0.8881   | 3492 | (-) | NNNNATGCAAATNAN      | ATAATTTGCAATTTG       |
| M0024 |            |          |      |     |                      |                       |
| 8     | V\$OCT1_07 | 0.799873 | 3494 | (-) | TNTATGNTAATT         | AATTTGCAATTT          |
| M0013 |            |          |      |     |                      |                       |
| 5     | V\$OCT1_01 | 0.735597 | 3508 | (-) | NNNNWTATGCAAATNTNNN  | TCTCATTTTACACACTGAA   |
| M0013 |            |          |      |     |                      |                       |
| 6     | V\$OCT1_02 | 0.781808 | 3519 | (-) | NNGAATATKCANNNN      | ACACTGAATCTTCCA       |

|       |            |          |      |     |                      |                     |
|-------|------------|----------|------|-----|----------------------|---------------------|
| M0016 |            |          |      |     |                      |                     |
| 2     | V\$OCT1_06 | 0.801562 | 3592 | (+) | CWNAWKWSATRYN        | CTTATTTTTTTATT      |
| M0013 |            |          |      |     | NNNNNNNWATGCAAATNNNW | TTTTATTCTTT-        |
| 8     | V\$OCT1_04 | 0.789419 | 3599 | (-) | NNW                  | GCAGAATGAACC        |
| M0013 |            |          |      |     |                      |                     |
| 5     | V\$OCT1_01 | 0.771652 | 3601 | (-) | NNNNWTATGCAAATNTNNN  | TTATTCTTTGCAGAATGAA |
| M0019 |            |          |      |     |                      |                     |
| 5     | V\$OCT1_Q6 | 0.804858 | 3603 | (-) | NNNNATGCAAATNAN      | ATTCTTTGCAGAATG     |
| M0016 |            |          |      |     |                      |                     |
| 2     | V\$OCT1_06 | 0.813672 | 3663 | (+) | CWNAWKWSATRYN        | CTCTCTTTCAGTTA      |
| M0016 |            |          |      |     |                      |                     |
| 2     | V\$OCT1_06 | 0.824219 | 3685 | (+) | CWNAWKWSATRYN        | GA CTGTGCATGTC      |
| M0016 |            |          |      |     |                      |                     |
| 2     | V\$OCT1_06 | 0.868359 | 3701 | (+) | CWNAWKWSATRYN        | CCTCATTTCAATTA      |
| M0016 |            |          |      |     |                      |                     |
| 2     | V\$OCT1_06 | 0.855469 | 3702 | (-) | CWNAWKWSATRYN        | CTCATTTCAATTTAT     |
| M0013 |            |          |      |     | NNNNNNNWATGCAAATNNNW | TCATTTATTTCTTCAATTG |
| 8     | V\$OCT1_04 | 0.811167 | 3707 | (-) | NNW                  | T                   |
| M0016 |            |          |      |     |                      |                     |
| 2     | V\$OCT1_06 | 0.808594 | 3757 | (+) | CWNAWKWSATRYN        | CTCTCTTAATTGTC      |
| M0016 |            |          |      |     |                      |                     |
| 2     | V\$OCT1_06 | 0.804297 | 3761 | (+) | CWNAWKWSATRYN        | CTTAATTGCTGT        |
| M0024 |            |          |      |     |                      |                     |
| 8     | V\$OCT1_07 | 0.836549 | 3769 | (+) | TNTATGNTAATT         | TCTGTTTTAATT        |
| M0013 |            |          |      |     |                      |                     |
| 7     | V\$OCT1_03 | 0.852627 | 3772 | (+) | NNNRTAATNANNN        | GTTTAATTAAAT        |
| M0016 |            |          |      |     |                      |                     |
| 2     | V\$OCT1_06 | 0.855469 | 3774 | (+) | CWNAWKWSATRYN        | TTTAATTAAATTCC      |
| M0024 |            |          |      |     |                      |                     |
| 8     | V\$OCT1_07 | 0.807717 | 3774 | (+) | TNTATGNTAATT         | TTTAATTAAATT        |
| M0013 |            |          |      |     | NNNNNNNWATGCAAATNNNW | TTAATTAAATTCC-      |
| 8     | V\$OCT1_04 | 0.781472 | 3775 | (+) | NNW                  | TATCAATCC           |
| M0016 |            |          |      |     |                      |                     |
| 2     | V\$OCT1_06 | 0.814062 | 3775 | (-) | CWNAWKWSATRYN        | TTAATTAAATTCCT      |
| M0013 |            |          |      |     |                      |                     |
| 6     | V\$OCT1_02 | 0.807526 | 3783 | (+) | NNGAATATKCANNNN      | ATTCTATTCAATCC      |
| M0013 |            |          |      |     | NNNNNNNWATGCAAATNNNW | ACATTGA-            |
| 8     | V\$OCT1_04 | 0.806775 | 3806 | (-) | NNW                  | TAAGTATGTACTAA      |
| M0013 |            |          |      |     |                      |                     |
| 7     | V\$OCT1_03 | 0.850257 | 3810 | (+) | NNNRTAATNANNN        | TTGATAAGTATGT       |
| M0013 |            |          |      |     |                      |                     |
| 5     | V\$OCT1_01 | 0.73884  | 3813 | (+) | NNNNWTATGCAAATNTNNN  | ATAAGTATGTACTAACT   |
| M0013 |            |          |      |     |                      |                     |
| 7     | V\$OCT1_03 | 0.870012 | 3839 | (+) | NNNRTAATNANNN        | CTGGTAAAGAAGG       |
| M0016 |            |          |      |     |                      |                     |
| 2     | V\$OCT1_06 | 0.916797 | 3867 | (+) | CWNAWKWSATRYN        | CTCCTTTAGATTTT      |
| M0016 |            |          |      |     |                      |                     |
| 2     | V\$OCT1_06 | 0.844922 | 3875 | (-) | CWNAWKWSATRYN        | GATTTTAAATTAG       |
| M0016 |            |          |      |     |                      |                     |
| 2     | V\$OCT1_06 | 0.832812 | 3880 | (+) | CWNAWKWSATRYN        | TAAATTAGATCCT       |
| M0016 |            |          |      |     |                      |                     |
| 2     | V\$OCT1_06 | 0.862891 | 3899 | (-) | CWNAWKWSATRYN        | TACAATAATTCTC       |
| M0016 |            |          |      |     |                      |                     |
| 2     | V\$OCT1_06 | 0.801562 | 3904 | (+) | CWNAWKWSATRYN        | CTAATTCTCTTATT      |
| M0019 |            |          |      |     |                      |                     |
| 5     | V\$OCT1_Q6 | 0.790666 | 3904 | (-) | NNNNATGCAAATNAN      | CTAATTCTCTTATT      |
| M0013 |            |          |      |     |                      |                     |
| 6     | V\$OCT1_02 | 0.782079 | 3922 | (-) | NNGAATATKCANNNN      | CTAAGAAATATTCTG     |
| M0013 |            |          |      |     |                      |                     |
| 6     | V\$OCT1_02 | 0.839199 | 3925 | (+) | NNGAATATKCANNNN      | AGAAATATTCTGGTT     |
| M0013 |            |          |      |     | NNNNNNNWATGCAAATNNNW | TTGTTCAAATGGAAACAT- |
| 8     | V\$OCT1_04 | 0.781263 | 3961 | (+) | NNW                  | ACTC                |
| M0016 |            |          |      |     |                      |                     |
| 2     | V\$OCT1_06 | 0.808594 | 3966 | (-) | CWNAWKWSATRYN        | CAAATGGAAACAT       |
| M0013 |            |          |      |     |                      |                     |
| 6     | V\$OCT1_02 | 0.796156 | 3989 | (-) | NNGAATATKCANNNN      | GGGGTGCATTTTCC      |

|       |            |          |      |     |                      |                        |
|-------|------------|----------|------|-----|----------------------|------------------------|
| M0013 |            |          |      |     |                      |                        |
| 7     | V\$OCT1_03 | 0.86369  | 4001 | (-) | NNNRTAATNANNN        | TCCTTTTATAAT           |
| M0016 |            |          |      |     |                      |                        |
| 2     | V\$OCT1_06 | 0.832031 | 4003 | (+) | CWNAWKWSATRYN        | CTTTTATAATTCA          |
| M0013 |            |          |      |     | NNNNNNNWATGCAAATNNNW | TTTTTATAATTCACAATTTAA- |
| 8     | V\$OCT1_04 | 0.79381  | 4004 | (+) | NNW                  | TA                     |
| M0013 |            |          |      |     |                      |                        |
| 6     | V\$OCT1_02 | 0.77098  | 4006 | (+) | NNGAATATKCANNNN      | TTTATAATTCACAAT        |
| M0016 |            |          |      |     |                      |                        |
| 2     | V\$OCT1_06 | 0.937891 | 4015 | (+) | CWNAWKWSATRYN        | CACAATTTAATATC         |
| M0016 |            |          |      |     |                      |                        |
| 2     | V\$OCT1_06 | 0.808594 | 4016 | (-) | CWNAWKWSATRYN        | ACAATTTAATATCT         |
| M0016 |            |          |      |     |                      |                        |
| 2     | V\$OCT1_06 | 0.813672 | 4103 | (-) | CWNAWKWSATRYN        | GACAGCCAAATTCT         |
| M0016 |            |          |      |     |                      |                        |
| 2     | V\$OCT1_06 | 0.800391 | 4112 | (+) | CWNAWKWSATRYN        | ATTCTTGAAAAATC         |
| M0013 |            |          |      |     |                      |                        |
| 6     | V\$OCT1_02 | 0.772604 | 4113 | (-) | NNGAATATKCANNNN      | TTCTTGAAAAATCAA        |
| M0013 |            |          |      |     | NNNNNNNWATGCAAATNNNW | TTGAAAAATCAACATAATTTT  |
| 8     | V\$OCT1_04 | 0.83166  | 4116 | (-) | NNW                  | TG                     |
| M0013 |            |          |      |     |                      |                        |
| 5     | V\$OCT1_01 | 0.77871  | 4118 | (-) | NNNNWTATGCAAATNTNNN  | GAAAAATCAACATAATTTT    |
| M0016 |            |          |      |     |                      |                        |
| 2     | V\$OCT1_06 | 0.831641 | 4120 | (-) | CWNAWKWSATRYN        | AAAATCAACATAAT         |
| M0024 |            |          |      |     |                      |                        |
| 8     | V\$OCT1_07 | 0.871105 | 4122 | (-) | TNTATGNTAATT         | AATCAACATAAT           |
| M0013 |            |          |      |     | NNNNNNNWATGCAAATNNNW | AATTTTGTTT-            |
| 8     | V\$OCT1_04 | 0.782936 | 4131 | (-) | NNW                  | GCAAATGTTTTT           |
| M0013 |            |          |      |     | NNNNNNNWATGCAAATNNNW | ATTTTGTTT-             |
| 8     | V\$OCT1_04 | 0.805521 | 4132 | (+) | NNW                  | GCAAATGTTTTT           |
| M0013 |            |          |      |     |                      |                        |
| 5     | V\$OCT1_01 | 0.814384 | 4134 | (+) | NNNNWTATGCAAATNTNNN  | TTTTGTTTGCAAATGTTTT    |
| M0016 |            |          |      |     |                      |                        |
| 2     | V\$OCT1_06 | 0.834375 | 4137 | (-) | CWNAWKWSATRYN        | TGTTTGCAAATGTT         |
| M0013 |            |          |      |     |                      |                        |
| 7     | V\$OCT1_03 | 0.8629   | 4161 | (-) | NNNRTAATNANNN        | ACTTGATTAAACC          |
| M0016 |            |          |      |     |                      |                        |
| 2     | V\$OCT1_06 | 0.847266 | 4173 | (+) | CWNAWKWSATRYN        | CTTTACTTCATTCA         |
| M0013 |            |          |      |     |                      |                        |
| 6     | V\$OCT1_02 | 0.851922 | 4202 | (-) | NNGAATATKCANNNN      | AAAAAGAATATTGAA        |
| M0013 |            |          |      |     | NNNNNNNWATGCAAATNNNW | AAAAGAA-               |
| 8     | V\$OCT1_04 | 0.840025 | 4203 | (+) | NNW                  | TATTGAAATCAGATAA       |
| M0013 |            |          |      |     |                      |                        |
| 5     | V\$OCT1_01 | 0.752766 | 4205 | (+) | NNNNWTATGCAAATNTNNN  | AAGAATATTGAAATCAGAT    |
| M0013 |            |          |      |     |                      |                        |
| 6     | V\$OCT1_02 | 0.842447 | 4205 | (+) | NNGAATATKCANNNN      | AAGAATATTGAAATC        |
| M0019 |            |          |      |     |                      |                        |
| 5     | V\$OCT1_Q6 | 0.84143  | 4207 | (+) | NNNNATGCAAATNAN      | GAATATTGAAATCAG        |
| M0016 |            |          |      |     |                      |                        |
| 1     | V\$OCT1_05 | 0.890752 | 4208 | (-) | MKNATTTGCATAYY       | AATATTGAAATCAG         |
| M0016 |            |          |      |     |                      |                        |
| 2     | V\$OCT1_06 | 0.866016 | 4208 | (-) | CWNAWKWSATRYN        | AATATTGAAATCAG         |
| M0024 |            |          |      |     |                      |                        |
| 8     | V\$OCT1_07 | 0.791181 | 4208 | (+) | TNTATGNTAATT         | AATATTGAAATC           |
| M0016 |            |          |      |     |                      |                        |
| 2     | V\$OCT1_06 | 0.813672 | 4214 | (-) | CWNAWKWSATRYN        | GAAATCAGATAAAC         |
| M0013 |            |          |      |     |                      |                        |
| 5     | V\$OCT1_01 | 0.762304 | 4218 | (+) | NNNNWTATGCAAATNTNNN  | TCAGATAAACAAATATTAA    |
| M0013 |            |          |      |     |                      |                        |
| 7     | V\$OCT1_03 | 0.852232 | 4219 | (+) | NNNRTAATNANNN        | CAGATAAACAAAT          |
| M0013 |            |          |      |     |                      |                        |
| 6     | V\$OCT1_02 | 0.78262  | 4223 | (-) | NNGAATATKCANNNN      | TAAACAAATATTAAA        |
| M0013 |            |          |      |     | NNNNNNNWATGCAAATNNNW | AAACAAATATTAAAAA-      |
| 8     | V\$OCT1_04 | 0.797365 | 4224 | (+) | NNW                  | GCTGCTT                |
| M0016 |            |          |      |     |                      |                        |
| 2     | V\$OCT1_06 | 0.869922 | 4229 | (-) | CWNAWKWSATRYN        | AATATTAAAAAGCT         |

|       |            |          |      |     |                      |                       |
|-------|------------|----------|------|-----|----------------------|-----------------------|
| M0013 |            |          |      |     | NNNNNNNWATGCAAATNNNW | AAAA-                 |
| 8     | V\$OCT1_04 | 0.7867   | 4236 | (+) | NNW                  | GCTGCTTTAAATTTTAATT   |
| M0016 |            |          |      |     |                      |                       |
| 2     | V\$OCT1_06 | 0.903906 | 4241 | (+) | CWNAWTKWSATRYN       | CTGCTTTAAATTTT        |
| M0019 |            |          |      |     |                      |                       |
| 5     | V\$OCT1_Q6 | 0.802129 | 4241 | (-) | NNNNATGCAAATNAN      | CTGCTTTAAATTTTA       |
| M0013 |            |          |      |     | NNNNNNNWATGCAAATNNNW | GCTTTAAATTTTAATT-     |
| 8     | V\$OCT1_04 | 0.819532 | 4243 | (-) | NNW                  | GTACCT                |
| M0016 |            |          |      |     |                      |                       |
| 2     | V\$OCT1_06 | 0.847656 | 4247 | (+) | CWNAWTKWSATRYN       | TAAATTTTAATTTG        |
| M0016 |            |          |      |     |                      |                       |
| 2     | V\$OCT1_06 | 0.873828 | 4247 | (-) | CWNAWTKWSATRYN       | TAAATTTTAATTTG        |
| M0024 |            |          |      |     |                      |                       |
| 8     | V\$OCT1_07 | 0.875556 | 4247 | (+) | TNTATGNTAATT         | TAAATTTTAATT          |
| M0013 |            |          |      |     | NNNNNNNWATGCAAATNNNW | AATTTTAATTTGTACCTTT-  |
| 8     | V\$OCT1_04 | 0.788373 | 4249 | (-) | NNW                  | GCAA                  |
| M0019 |            |          |      |     |                      |                       |
| 5     | V\$OCT1_Q6 | 0.802129 | 4253 | (-) | NNNNATGCAAATNAN      | TTAATTTGTACCTTT       |
| M0013 |            |          |      |     |                      |                       |
| 5     | V\$OCT1_01 | 0.751049 | 4259 | (-) | NNNNWTATGCAAATNTNNN  | TGTACCTTTGCAAAACACT   |
| M0019 |            |          |      |     |                      |                       |
| 5     | V\$OCT1_Q6 | 0.809771 | 4262 | (+) | NNNNATGCAAATNAN      | ACCTTTGCAAAACAC       |
| M0016 |            |          |      |     |                      |                       |
| 2     | V\$OCT1_06 | 0.868359 | 4278 | (+) | CWNAWTKWSATRYN       | CATGTTTTCATTTG        |
| M0013 |            |          |      |     | NNNNNNNWATGCAAATNNNW | TGTTTTCATTTGCATAAC-   |
| 8     | V\$OCT1_04 | 0.898578 | 4280 | (-) | NNW                  | CTATG                 |
| M0013 |            |          |      |     | NNNNNNNWATGCAAATNNNW | GTTTTCATTTGCATAAC-    |
| 8     | V\$OCT1_04 | 0.7867   | 4281 | (+) | NNW                  | CTATGT                |
| M0013 |            |          |      |     |                      |                       |
| 5     | V\$OCT1_01 | 0.876574 | 4282 | (-) | NNNNWTATGCAAATNTNNN  | TTTTCATTTGCATAACCTA   |
| M0016 |            |          |      |     |                      |                       |
| 1     | V\$OCT1_05 | 0.896895 | 4284 | (+) | MKNATTTGCATAYY       | TTCATTTGCATAAC        |
| M0019 |            |          |      |     |                      |                       |
| 5     | V\$OCT1_Q6 | 0.88619  | 4284 | (-) | NNNNATGCAAATNAN      | TTCATTTGCATAACC       |
| M0013 |            |          |      |     |                      |                       |
| 6     | V\$OCT1_02 | 0.822956 | 4286 | (-) | NNGAATATKCANNNN      | CATTTGCATAACCTA       |
| M0024 |            |          |      |     |                      |                       |
| 8     | V\$OCT1_07 | 0.840153 | 4286 | (-) | TNTATGNTAATT         | CATTTGCATAAC          |
| M0013 |            |          |      |     | NNNNNNNWATGCAAATNNNW | CATAAC-               |
| 8     | V\$OCT1_04 | 0.804475 | 4292 | (+) | NNW                  | CTATGTAGAATTTTACA     |
| M0016 |            |          |      |     |                      |                       |
| 2     | V\$OCT1_06 | 0.828906 | 4305 | (+) | CWNAWTKWSATRYN       | GAATTTTACAATTT        |
| M0016 |            |          |      |     |                      |                       |
| 2     | V\$OCT1_06 | 0.839453 | 4306 | (-) | CWNAWTKWSATRYN       | AATTTTACAATTTT        |
| M0013 |            |          |      |     | NNNNNNNWATGCAAATNNNW | TTTACAATTTCCATGTTT    |
| 8     | V\$OCT1_04 | 0.875784 | 4308 | (-) | NNW                  | TA                    |
| M0013 |            |          |      |     |                      |                       |
| 5     | V\$OCT1_01 | 0.813621 | 4310 | (-) | NNNNWTATGCAAATNTNNN  | TTACAATTTCCATGTTT     |
| M0016 |            |          |      |     |                      |                       |
| 1     | V\$OCT1_05 | 0.880624 | 4312 | (+) | MKNATTTGCATAYY       | ACAATTTCCATGTT        |
| M0016 |            |          |      |     |                      |                       |
| 2     | V\$OCT1_06 | 0.812109 | 4312 | (+) | CWNAWTKWSATRYN       | ACAATTTCCATGTT        |
| M0019 |            |          |      |     |                      |                       |
| 5     | V\$OCT1_Q6 | 0.835972 | 4312 | (-) | NNNNATGCAAATNAN      | ACAATTTCCATGTTT       |
| M0013 |            |          |      |     |                      |                       |
| 6     | V\$OCT1_02 | 0.776394 | 4314 | (-) | NNGAATATKCANNNN      | AATTTCCATGTTT         |
| M0024 |            |          |      |     |                      |                       |
| 8     | V\$OCT1_07 | 0.893788 | 4314 | (-) | TNTATGNTAATT         | AATTTCCATGTT          |
| M0024 |            |          |      |     |                      |                       |
| 8     | V\$OCT1_07 | 0.841213 | 4318 | (+) | TNTATGNTAATT         | TCCATGTTT             |
| M0013 |            |          |      |     | NNNNNNNWATGCAAATNNNW | CCATGTTTATTATAATGGAAT |
| 8     | V\$OCT1_04 | 0.78921  | 4319 | (+) | NNW                  | GT                    |
| M0013 |            |          |      |     |                      |                       |
| 7     | V\$OCT1_03 | 0.873173 | 4322 | (-) | NNNRTAATNANNN        | TGTTTATTATAAT         |
| M0013 |            |          |      |     |                      |                       |
| 7     | V\$OCT1_03 | 0.866061 | 4327 | (+) | NNNRTAATNANNN        | ATTATAATGGAAT         |

|       |   |            |          |      |     |                      |                              |
|-------|---|------------|----------|------|-----|----------------------|------------------------------|
| M0016 | 2 | V\$OCT1_06 | 0.876172 | 4329 | (+) | CWNAWKWSATRYN        | TATAATGGAATGTT               |
| M0013 | 6 | V\$OCT1_02 | 0.834326 | 4331 | (-) | NNGAATATKCANNNN      | TAATGGAATGTTCTT              |
| M0016 | 2 | V\$OCT1_06 | 0.855078 | 4363 | (+) | CWNAWKWSATRYN        | CACTATGTGTTGTA               |
| M0013 | 8 | V\$OCT1_04 | 0.862401 | 4370 | (-) | NNNNNNNWATGCAAATNNNW | TGTTGTATTTTCAA-<br>TAATTTTGT |
| M0016 | 2 | V\$OCT1_06 | 0.808203 | 4375 | (-) | CWNAWKWSATRYN        | TATTTTCAATAATT               |
| M0024 | 8 | V\$OCT1_07 | 0.791181 | 4376 | (-) | TNTATGNTAATT         | ATTTTCAATAAT                 |
| M0013 | 7 | V\$OCT1_03 | 0.847096 | 4380 | (+) | NNNRTAATNANNN        | TCAATAATTTTGT                |
| M0016 | 2 | V\$OCT1_06 | 0.829297 | 4391 | (+) | CWNAWKWSATRYN        | GTGACTGACTTGTC               |
| M0016 | 2 | V\$OCT1_06 | 0.855078 | 4397 | (-) | CWNAWKWSATRYN        | GACTTGCAAGTAG                |
| M0016 | 2 | V\$OCT1_06 | 0.847656 | 4415 | (+) | CWNAWKWSATRYN        | CAAACAGAAATTTT               |
| M0016 | 2 | V\$OCT1_06 | 0.826562 | 4421 | (+) | CWNAWKWSATRYN        | GAAATTTTACTTCA               |
| M0016 | 2 | V\$OCT1_06 | 0.847656 | 4441 | (+) | CWNAWKWSATRYN        | CTGTATAAAATATT               |
| M0016 | 2 | V\$OCT1_06 | 0.855078 | 4442 | (-) | CWNAWKWSATRYN        | TGTATAAAATATTT               |
| M0016 | 2 | V\$OCT1_06 | 0.834375 | 4448 | (+) | CWNAWKWSATRYN        | AAATATTTGATAGG               |
| M0013 | 8 | V\$OCT1_04 | 0.789    | 4479 | (-) | NNNNNNNWATGCAAATNNNW | AATGATTTTAAACATAAC-<br>CTTCC |
| M0013 | 5 | V\$OCT1_01 | 0.751622 | 4481 | (-) | NNNNWTATGCAAATNTNNN  | TGATTTTTAAACATAACCTT         |
| M0016 | 2 | V\$OCT1_06 | 0.816016 | 4534 | (-) | CWNAWKWSATRYN        | GACAGGTAAGAAAT               |
| M0016 | 2 | V\$OCT1_06 | 0.842187 | 4538 | (-) | CWNAWKWSATRYN        | GGTAAGAAATTGTC               |
| M0013 | 5 | V\$OCT1_01 | 0.752766 | 4576 | (+) | NNNNWTATGCAAATNTNNN  | AAATGGAAGCAAATTTTGT          |
| M0016 | 2 | V\$OCT1_06 | 0.860547 | 4580 | (-) | CWNAWKWSATRYN        | GGAAGCAAATTTTG               |
| M0016 | 2 | V\$OCT1_06 | 0.839453 | 4606 | (+) | CWNAWKWSATRYN        | AGTATTGTGGTGTT               |
| M0013 | 7 | V\$OCT1_03 | 0.84354  | 4636 | (-) | NNNRTAATNANNN        | GCCTTTTTATGGA                |
| M0013 | 8 | V\$OCT1_04 | 0.831451 | 4636 | (+) | NNNNNNNWATGCAAATNNNW | GCCTTTTTATGGAAA-<br>TAAACACT |
| M0013 | 5 | V\$OCT1_01 | 0.816101 | 4638 | (+) | NNNNWTATGCAAATNTNNN  | CTTTTTATGGAAATAAACA          |
| M0024 | 8 | V\$OCT1_07 | 0.869197 | 4641 | (+) | TNTATGNTAATT         | TTTATGGAAATA                 |
| M0013 | 6 | V\$OCT1_02 | 0.806443 | 4687 | (+) | NNGAATATKCANNNN      | AAGAGAATTCAGAAT              |
| M0013 | 6 | V\$OCT1_02 | 0.785598 | 4693 | (-) | NNGAATATKCANNNN      | ATTCAGAATAATGAC              |
| M0013 | 8 | V\$OCT1_04 | 0.79611  | 4695 | (+) | NNNNNNNWATGCAAATNNNW | TCAGAA-<br>TAATGACTAAAACAAAA |
| M0013 | 7 | V\$OCT1_03 | 0.899249 | 4697 | (+) | NNNRTAATNANNN        | AGAATAATGACTA                |
| M0016 | 2 | V\$OCT1_06 | 0.88125  | 4713 | (+) | CWNAWKWSATRYN        | CAAAATGAAAGATA               |
| M0016 | 2 | V\$OCT1_06 | 0.834375 | 4714 | (-) | CWNAWKWSATRYN        | AAAATGAAAGATAA               |
| M0016 | 2 | V\$OCT1_06 | 0.803906 | 4729 | (-) | CWNAWKWSATRYN        | AACAACAAAATTTA               |
| M0013 | 8 | V\$OCT1_04 | 0.832497 | 4748 | (-) | NNNNNNNWATGCAAATNNNW | ACAAAATTTTAAAA-<br>TATTTTAA  |

|       |            |          |      |     |                       |                       |
|-------|------------|----------|------|-----|-----------------------|-----------------------|
| M0016 |            |          |      |     |                       |                       |
| 2     | V\$OCT1_06 | 0.839453 | 4750 | (+) | CWNAWKWSATRYN         | AAAATTTTAAAATA        |
| M0016 |            |          |      |     |                       |                       |
| 2     | V\$OCT1_06 | 0.800391 | 4751 | (-) | CWNAWKWSATRYN         | AAATTTTAAAAATAT       |
| M0016 |            |          |      |     |                       |                       |
| 2     | V\$OCT1_06 | 0.834375 | 4752 | (+) | CWNAWKWSATRYN         | AATTTTAAAAATATT       |
| M0016 |            |          |      |     |                       |                       |
| 2     | V\$OCT1_06 | 0.839453 | 4752 | (-) | CWNAWKWSATRYN         | AATTTTAAAAATATT       |
| M0013 |            |          |      |     | NNNNNNNNWATGCAAATNNNW | AAAATATTTTAAAGTG-     |
| 8     | V\$OCT1_04 | 0.780427 | 4758 | (-) | NNW                   | CACATTT               |
| M0013 |            |          |      |     |                       |                       |
| 6     | V\$OCT1_02 | 0.796697 | 4768 | (-) | NNGAATATKCANNNN       | TAAGTGCACATTTAC       |
| M0013 |            |          |      |     | NNNNNNNNWATGCAAATNNNW | AGTGCACATTTACAT-      |
| 8     | V\$OCT1_04 | 0.81744  | 4770 | (-) | NNW                   | ACTGACAA              |
| M0013 |            |          |      |     |                       |                       |
| 5     | V\$OCT1_01 | 0.878863 | 4772 | (-) | NNNNWTATGCAAATNTNNN   | TGCACATTTACATACTGAC   |
| M0016 |            |          |      |     |                       |                       |
| 2     | V\$OCT1_06 | 0.971484 | 4774 | (+) | CWNAWKWSATRYN         | CACATTTACATACT        |
| M0016 |            |          |      |     |                       |                       |
| 2     | V\$OCT1_06 | 0.821484 | 4774 | (-) | CWNAWKWSATRYN         | CACATTTACATACT        |
| M0019 |            |          |      |     |                       |                       |
| 5     | V\$OCT1_Q6 | 0.835153 | 4774 | (-) | NNNNATGCAAATNAN       | CACATTTACATACTG       |
| M0024 |            |          |      |     |                       |                       |
| 8     | V\$OCT1_07 | 0.852025 | 4776 | (-) | TNTATGNTAATT          | CATTTACATACT          |
| M0016 |            |          |      |     |                       |                       |
| 2     | V\$OCT1_06 | 0.812109 | 4782 | (+) | CWNAWKWSATRYN         | CATACTGACAACCTT       |
| M0016 |            |          |      |     |                       |                       |
| 2     | V\$OCT1_06 | 0.826562 | 4791 | (-) | CWNAWKWSATRYN         | AACTTTAAAGAAAG        |
| M0016 |            |          |      |     |                       |                       |
| 2     | V\$OCT1_06 | 0.808203 | 4815 | (+) | CWNAWKWSATRYN         | AGACACTTAATGCA        |
| M0016 |            |          |      |     |                       |                       |
| 2     | V\$OCT1_06 | 0.800781 | 4821 | (-) | CWNAWKWSATRYN         | TTAATGCAAGAAAT        |
| M0016 |            |          |      |     |                       |                       |
| 2     | V\$OCT1_06 | 0.826562 | 4866 | (-) | CWNAWKWSATRYN         | AAAAACACATTCAT        |
| M0013 |            |          |      |     |                       |                       |
| 6     | V\$OCT1_02 | 0.77477  | 4868 | (+) | NNGAATATKCANNNN       | AAACACATTCATCTT       |
| M0016 |            |          |      |     |                       |                       |
| 2     | V\$OCT1_06 | 0.903906 | 4877 | (+) | CWNAWKWSATRYN         | CATCTTTTAAATTTG       |
| M0013 |            |          |      |     | NNNNNNNNWATGCAAATNNNW | TCTTTTAAATTTGCAGTAG-  |
| 8     | V\$OCT1_04 | 0.880176 | 4879 | (-) | NNW                   | CAATG                 |
| M0013 |            |          |      |     |                       |                       |
| 5     | V\$OCT1_01 | 0.763831 | 4881 | (-) | NNNNWTATGCAAATNTNNN   | TTTTAATTTGCAGTAGCAA   |
| M0019 |            |          |      |     |                       |                       |
| 5     | V\$OCT1_Q6 | 0.793668 | 4883 | (-) | NNNNATGCAAATNAN       | TTAATTTGCAGTAGC       |
| M0016 |            |          |      |     |                       |                       |
| 2     | V\$OCT1_06 | 0.821484 | 4895 | (+) | CWNAWKWSATRYN         | AGCAATGTAAGGTA        |
| M0019 |            |          |      |     |                       |                       |
| 5     | V\$OCT1_Q6 | 0.792849 | 4895 | (+) | NNNNATGCAAATNAN       | AGCAATGTAAGGTAT       |
| M0016 |            |          |      |     |                       |                       |
| 2     | V\$OCT1_06 | 0.808594 | 4896 | (-) | CWNAWKWSATRYN         | GCAATGTAAGGTAT        |
| M0013 |            |          |      |     | NNNNNNNNWATGCAAATNNNW | GTTTCTCATAGA-         |
| 8     | V\$OCT1_04 | 0.785027 | 4910 | (+) | NNW                   | TATCCATTCA            |
| M0013 |            |          |      |     | NNNNNNNNWATGCAAATNNNW | CTCATAGA-             |
| 8     | V\$OCT1_04 | 0.804266 | 4915 | (-) | NNW                   | TATCCATTCATTTGT       |
| M0013 |            |          |      |     |                       |                       |
| 6     | V\$OCT1_02 | 0.808609 | 4918 | (+) | NNGAATATKCANNNN       | ATAGATATCCATTCA       |
| M0013 |            |          |      |     | NNNNNNNNWATGCAAATNNNW | TCCATTCATTT-          |
| 8     | V\$OCT1_04 | 0.78189  | 4925 | (-) | NNW                   | GTGTCCCTCTTT          |
| M0013 |            |          |      |     |                       |                       |
| 7     | V\$OCT1_03 | 0.88384  | 4940 | (-) | NNNRTAATNANNN         | CCCTCTTTACTAA         |
| M0016 |            |          |      |     |                       |                       |
| 2     | V\$OCT1_06 | 0.855469 | 5011 | (+) | CWNAWKWSATRYN         | ATCAATGATATTTA        |
| M0013 |            |          |      |     | NNNNNNNNWATGCAAATNNNW | TCAATGATATTTAAATTATT- |
| 8     | V\$OCT1_04 | 0.860728 | 5012 | (+) | NNW                   | TA                    |
| M0013 |            |          |      |     | NNNNNNNNWATGCAAATNNNW | CAATGA-               |
| 8     | V\$OCT1_04 | 0.832915 | 5013 | (-) | NNW                   | TATTTAAATTATTTTAA     |



|       |   |            |          |      |     |                             |                              |
|-------|---|------------|----------|------|-----|-----------------------------|------------------------------|
| M0013 | 5 | V\$OCT1_01 | 0.734071 | 5014 | (+) | NNNNWTATGCAAATNTNNN         | AATGATATTTAAATTATTT          |
| M0013 | 6 | V\$OCT1_02 | 0.794532 | 5014 | (+) | NNGAATATKCANNNN             | AATGATATTTAAATT              |
| M0013 | 5 | V\$OCT1_01 | 0.7438   | 5015 | (-) | NNNNWTATGCAAATNTNNN         | ATGATATTTAAATTATTTT          |
| M0019 | 5 | V\$OCT1_Q6 | 0.804312 | 5016 | (+) | NNNNATGCAAATNAN             | TGATATTTAAATTAT              |
| M0016 | 2 | V\$OCT1_06 | 0.847656 | 5017 | (+) | CWNAWTKWSATRYN              | GATATTTAAATTAT               |
| M0016 | 2 | V\$OCT1_06 | 0.916797 | 5017 | (-) | CWNAWTKWSATRYN              | GATATTTAAATTAT               |
| M0024 | 8 | V\$OCT1_07 | 0.872589 | 5017 | (+) | TNTATGNTAATT                | GATATTTAAATT                 |
| M0013 | 8 | V\$OCT1_04 | 0.81054  | 5021 | (+) | NNNNNNNWATGCAAATNNNW<br>NNW | TTTAAATTATTTTAAAAGTTA<br>GT  |
| M0016 | 2 | V\$OCT1_06 | 0.841797 | 5057 | (+) | CWNAWTKWSATRYN              | ATATTTTACAAGTT               |
| M0016 | 2 | V\$OCT1_06 | 0.826562 | 5074 | (+) | CWNAWTKWSATRYN              | CTTTATTGTTTCA                |
| M0016 | 2 | V\$OCT1_06 | 0.839453 | 5106 | (-) | CWNAWTKWSATRYN              | AGAAACACAAAATG               |
| M0013 | 5 | V\$OCT1_01 | 0.731973 | 5141 | (+) | NNNNWTATGCAAATNTNNN         | TTTCTTAAGATAATGTGGC          |
| M0013 | 7 | V\$OCT1_03 | 0.846701 | 5147 | (+) | NNNRTAATNANNN               | AAGATAATGTGGC                |
| M0016 | 2 | V\$OCT1_06 | 0.806641 | 5163 | (-) | CWNAWTKWSATRYN              | AAAATGTATTCTTG               |
| M0016 | 2 | V\$OCT1_06 | 0.813672 | 5187 | (+) | CWNAWTKWSATRYN              | AGTGTTTTAATTTA               |
| M0024 | 8 | V\$OCT1_07 | 0.817257 | 5187 | (+) | TNTATGNTAATT                | AGTGTTTTAATT                 |
| M0013 | 6 | V\$OCT1_02 | 0.84732  | 5202 | (-) | NNGAATATKCANNNN             | AAAAAGAATATTTGT              |
| M0013 | 6 | V\$OCT1_02 | 0.829995 | 5205 | (+) | NNGAATATKCANNNN             | AAGAATATTTGTCTT              |
| M0016 | 2 | V\$OCT1_06 | 0.826172 | 5209 | (+) | CWNAWTKWSATRYN              | ATATTTGTCTTACT               |
| M0016 | 2 | V\$OCT1_06 | 0.821094 | 5230 | (-) | CWNAWTKWSATRYN              | TACTTCCCATAAAC               |
| M0024 | 8 | V\$OCT1_07 | 0.800933 | 5231 | (-) | TNTATGNTAATT                | ACTTCCCATAAA                 |
| M0016 | 2 | V\$OCT1_06 | 0.834375 | 5240 | (-) | CWNAWTKWSATRYN              | AAACTTCAAAAATG               |
| M0016 | 2 | V\$OCT1_06 | 0.821094 | 5272 | (+) | CWNAWTKWSATRYN              | GAATTCTAAATATT               |
| M0016 | 2 | V\$OCT1_06 | 0.834375 | 5272 | (-) | CWNAWTKWSATRYN              | GAATTCTAAATATT               |
| M0013 | 6 | V\$OCT1_02 | 0.826746 | 5274 | (-) | NNGAATATKCANNNN             | ATTCTAAATATTGAT              |
| M0013 | 6 | V\$OCT1_02 | 0.786952 | 5277 | (+) | NNGAATATKCANNNN             | CTAAATATTGATTTT              |
| M0016 | 2 | V\$OCT1_06 | 0.805469 | 5287 | (+) | CWNAWTKWSATRYN              | ATTTTATTGATTTA               |
| M0016 | 2 | V\$OCT1_06 | 0.821484 | 5299 | (-) | CWNAWTKWSATRYN              | TAACTTTAAAGCTG               |
| M0016 | 2 | V\$OCT1_06 | 0.847266 | 5334 | (-) | CWNAWTKWSATRYN              | TGAATGAATAAATG               |
| M0016 | 2 | V\$OCT1_06 | 0.847266 | 5354 | (-) | CWNAWTKWSATRYN              | TGAATGAATAAATG               |
| M0013 | 8 | V\$OCT1_04 | 0.805102 | 5357 | (+) | NNNNNNNWATGCAAATNNNW<br>NNW | ATGAA-<br>TAAATGCAATTATAGACA |
| M0013 | 5 | V\$OCT1_01 | 0.767074 | 5359 | (+) | NNNNWTATGCAAATNTNNN         | GAATAAATGCAATTATAGA          |
| M0013 | 6 | V\$OCT1_02 | 0.771792 | 5359 | (+) | NNGAATATKCANNNN             | GAATAAATGCAATTA              |

|       |            |          |      |     |                      |                      |
|-------|------------|----------|------|-----|----------------------|----------------------|
| M0016 |            |          |      |     |                      |                      |
| 2     | V\$OCT1_06 | 0.876172 | 5362 | (-) | CWNAWKWSATRYN        | TAAATGCAATTATA       |
| M0013 |            |          |      |     |                      |                      |
| 7     | V\$OCT1_03 | 0.841565 | 5365 | (-) | NNNRTAATNANNN        | ATGCAATTATAGA        |
| M0016 |            |          |      |     |                      |                      |
| 2     | V\$OCT1_06 | 0.834375 | 5400 | (-) | CWNAWKWSATRYN        | AAACTGAAAGAATG       |
| M0016 |            |          |      |     |                      |                      |
| 2     | V\$OCT1_06 | 0.839844 | 5424 | (-) | CWNAWKWSATRYN        | GGTATTATATAAAG       |
| M0013 |            |          |      |     | NNNNNNNWATGCAAATNNNW | AAGAATGTTTTACATAATT- |
| 8     | V\$OCT1_04 | 0.838561 | 5453 | (-) | NNW                  | AGTT                 |
| M0013 |            |          |      |     |                      |                      |
| 5     | V\$OCT1_01 | 0.790919 | 5455 | (-) | NNNNWTATGCAAATNTNNN  | GAATGTTTTACATAATTAG  |
| M0016 |            |          |      |     |                      |                      |
| 2     | V\$OCT1_06 | 0.834375 | 5457 | (+) | CWNAWKWSATRYN        | ATGTTTTACATAAT       |
| M0019 |            |          |      |     |                      |                      |
| 5     | V\$OCT1_Q6 | 0.832697 | 5457 | (-) | NNNNATGCAAATNAN      | ATGTTTTACATAATT      |
| M0016 |            |          |      |     |                      |                      |
| 2     | V\$OCT1_06 | 0.821094 | 5458 | (-) | CWNAWKWSATRYN        | TGTTTTACATAATT       |
| M0013 |            |          |      |     |                      |                      |
| 7     | V\$OCT1_03 | 0.926906 | 5463 | (+) | NNNRTAATNANNN        | TACATAATTAGTT        |
| M0013 |            |          |      |     |                      |                      |
| 7     | V\$OCT1_03 | 0.873173 | 5464 | (-) | NNNRTAATNANNN        | ACATAATTAGTTA        |
| M0016 |            |          |      |     |                      |                      |
| 2     | V\$OCT1_06 | 0.894141 | 5465 | (+) | CWNAWKWSATRYN        | CATAATTAGTTATT       |
| M0013 |            |          |      |     |                      |                      |
| 7     | V\$OCT1_03 | 0.886211 | 5471 | (-) | NNNRTAATNANNN        | TAGTTATTATTCA        |
| M0013 |            |          |      |     |                      |                      |
| 6     | V\$OCT1_02 | 0.872225 | 5473 | (+) | NNGAATATKCANNNN      | GTTATTATTCACTTT      |
| M0016 |            |          |      |     |                      |                      |
| 2     | V\$OCT1_06 | 0.804297 | 5493 | (-) | CWNAWKWSATRYN        | AAAATGATTTTTTG       |
| M0016 |            |          |      |     |                      |                      |
| 2     | V\$OCT1_06 | 0.813672 | 5499 | (+) | CWNAWKWSATRYN        | ATTTTTGGATCTG        |
| M0016 |            |          |      |     |                      |                      |
| 2     | V\$OCT1_06 | 0.805859 | 5524 | (+) | CWNAWKWSATRYN        | AGATTTTAAATAGA       |
| M0016 |            |          |      |     |                      |                      |
| 2     | V\$OCT1_06 | 0.821484 | 5525 | (-) | CWNAWKWSATRYN        | GATTTTAAATAGAG       |
| M0016 |            |          |      |     |                      |                      |
| 2     | V\$OCT1_06 | 0.826172 | 5566 | (+) | CWNAWKWSATRYN        | AAATTTGTGAGATA       |
| M0013 |            |          |      |     | NNNNNNNWATGCAAATNNNW | AGATAAAATAAATATCTTT- |
| 8     | V\$OCT1_04 | 0.785445 | 5575 | (-) | NNW                  | GTAA                 |
| M0016 |            |          |      |     |                      |                      |
| 2     | V\$OCT1_06 | 0.834375 | 5577 | (+) | CWNAWKWSATRYN        | ATAAAATAAATATC       |
| M0013 |            |          |      |     |                      |                      |
| 6     | V\$OCT1_02 | 0.779643 | 5579 | (-) | NNGAATATKCANNNN      | AAAATAAATATCTTT      |
| M0016 |            |          |      |     |                      |                      |
| 2     | V\$OCT1_06 | 0.839453 | 5598 | (+) | CWNAWKWSATRYN        | CTATTCTTCATACC       |
| M0013 |            |          |      |     | NNNNNNNWATGCAAATNNNW | TCTTCATACCTGAATGAT-  |
| 8     | V\$OCT1_04 | 0.788791 | 5602 | (-) | NNW                  | TATCT                |
| M0013 |            |          |      |     |                      |                      |
| 6     | V\$OCT1_02 | 0.771792 | 5608 | (-) | NNGAATATKCANNNN      | TACCTGAATGATTAT      |
| M0013 |            |          |      |     |                      |                      |
| 7     | V\$OCT1_03 | 0.862505 | 5613 | (-) | NNNRTAATNANNN        | GAATGATTATCTT        |
| M0013 |            |          |      |     |                      |                      |
| 7     | V\$OCT1_03 | 0.86211  | 5623 | (-) | NNNRTAATNANNN        | CTTGATTATCTT         |
| M0013 |            |          |      |     | NNNNNNNWATGCAAATNNNW | GTAAGATTATTTTAAAC-   |
| 8     | V\$OCT1_04 | 0.812422 | 5670 | (+) | NNW                  | TATTA                |
| M0013 |            |          |      |     |                      |                      |
| 6     | V\$OCT1_02 | 0.771251 | 5672 | (+) | NNGAATATKCANNNN      | AAGATTATTTTAAA       |
| M0013 |            |          |      |     | NNNNNNNWATGCAAATNNNW | AGATTATTTTAAAC-      |
| 8     | V\$OCT1_04 | 0.801547 | 5673 | (-) | NNW                  | TATTAAAT             |
| M0016 |            |          |      |     |                      |                      |
| 2     | V\$OCT1_06 | 0.90625  | 5685 | (+) | CWNAWKWSATRYN        | AACTATTAAATATA       |
| M0013 |            |          |      |     |                      |                      |
| 7     | V\$OCT1_03 | 0.867641 | 5710 | (+) | NNNRTAATNANNN        | GACGTAAAAACAT        |
| M0016 |            |          |      |     |                      |                      |
| 2     | V\$OCT1_06 | 0.828906 | 5717 | (+) | CWNAWKWSATRYN        | AAACATTTCCTTTA       |

|       |            |          |      |     |                       |                     |
|-------|------------|----------|------|-----|-----------------------|---------------------|
| M0016 |            |          |      |     |                       |                     |
| 2     | V\$OCT1_06 | 0.821484 | 5723 | (+) | CWNAWTKWSATRYN        | TTCCTTTAAATACC      |
| M0013 |            |          |      |     |                       |                     |
| 6     | V\$OCT1_02 | 0.773416 | 5743 | (-) | NNGAATATKCANNNN       | AAAATGAATAAATAA     |
| M0013 |            |          |      |     |                       |                     |
| 7     | V\$OCT1_03 | 0.848281 | 5747 | (+) | NNNRTAATNANNN         | TGAATAAATAAGT       |
| M0016 |            |          |      |     |                       |                     |
| 2     | V\$OCT1_06 | 0.800781 | 5769 | (-) | CWNAWTKWSATRYN        | CAAAACTAAGACAG      |
| M0016 |            |          |      |     |                       |                     |
| 2     | V\$OCT1_06 | 0.821094 | 5782 | (-) | CWNAWTKWSATRYN        | GATATCTCTAATTC      |
| M0013 |            |          |      |     | NNNNNNNNWATGCAAATNNNW | TATCTCTAATTCAAA-    |
| 8     | V\$OCT1_04 | 0.809076 | 5784 | (+) | NNW                   | GAAAAGAA            |
| M0013 |            |          |      |     |                       |                     |
| 5     | V\$OCT1_01 | 0.754865 | 5809 | (-) | NNNNWTATGCAAATNTNNN   | TACAGCATAGCATATGAAA |
| M0016 |            |          |      |     |                       |                     |
| 2     | V\$OCT1_06 | 0.842578 | 5811 | (+) | CWNAWTKWSATRYN        | CAGCATAGCATATG      |
| M0013 |            |          |      |     |                       |                     |
| 6     | V\$OCT1_02 | 0.77477  | 5813 | (-) | NNGAATATKCANNNN       | GCATAGCATATGAAA     |
| M0016 |            |          |      |     |                       |                     |
| 2     | V\$OCT1_06 | 0.847656 | 5819 | (-) | CWNAWTKWSATRYN        | CATATGAAAGCCAG      |
| M0016 |            |          |      |     |                       |                     |
| 2     | V\$OCT1_06 | 0.800391 | 5831 | (-) | CWNAWTKWSATRYN        | AGAATTAAGTGAAT      |
| M0013 |            |          |      |     |                       |                     |
| 6     | V\$OCT1_02 | 0.775582 | 5836 | (-) | NNGAATATKCANNNN       | TAACTGAATAACTAA     |
| M0013 |            |          |      |     | NNNNNNNNWATGCAAATNNNW | AAACCAACACTCAAATTC- |
| 8     | V\$OCT1_04 | 0.790882 | 5849 | (+) | NNW                   | TATGG               |
| M0016 |            |          |      |     |                       |                     |
| 2     | V\$OCT1_06 | 0.821875 | 5854 | (+) | CWNAWTKWSATRYN        | AACACTCAAATTCT      |
| M0016 |            |          |      |     |                       |                     |
| 2     | V\$OCT1_06 | 0.813672 | 5854 | (-) | CWNAWTKWSATRYN        | AACACTCAAATTCT      |
| M0013 |            |          |      |     |                       |                     |
| 6     | V\$OCT1_02 | 0.778289 | 5933 | (+) | NNGAATATKCANNNN       | AAAAAATCCATTTT      |
| M0016 |            |          |      |     |                       |                     |
| 2     | V\$OCT1_06 | 0.847656 | 5935 | (-) | CWNAWTKWSATRYN        | AAAAATCCATTTTG      |
| M0013 |            |          |      |     | NNNNNNNNWATGCAAATNNNW | AAATCCATTTTGCTTAAA- |
| 8     | V\$OCT1_04 | 0.7867   | 5937 | (-) | NNW                   | TATTT               |
| M0013 |            |          |      |     |                       |                     |
| 5     | V\$OCT1_01 | 0.789966 | 5939 | (-) | NNNNWTATGCAAATNTNNN   | ATCCATTTTGCTTAAATAT |
| M0013 |            |          |      |     |                       |                     |
| 6     | V\$OCT1_02 | 0.840552 | 5947 | (-) | NNGAATATKCANNNN       | TGCTTAAATATTTAT     |
| M0013 |            |          |      |     | NNNNNNNNWATGCAAATNNNW | TGCTTAAATATTTA-     |
| 8     | V\$OCT1_04 | 0.823505 | 5947 | (-) | NNW                   | TATGCCATT           |
| M0013 |            |          |      |     | NNNNNNNNWATGCAAATNNNW | GCTTAAATATTTA-      |
| 8     | V\$OCT1_04 | 0.80343  | 5948 | (+) | NNW                   | TATGCCATTG          |
| M0013 |            |          |      |     |                       |                     |
| 6     | V\$OCT1_02 | 0.791012 | 5950 | (+) | NNGAATATKCANNNN       | TTAAATATTTATATG     |
| M0013 |            |          |      |     |                       |                     |
| 7     | V\$OCT1_03 | 0.84196  | 5952 | (-) | NNNRTAATNANNN         | AAATATTTATATG       |
| M0016 |            |          |      |     |                       |                     |
| 2     | V\$OCT1_06 | 0.876172 | 5953 | (+) | CWNAWTKWSATRYN        | AATATTTATATGCC      |
| M0016 |            |          |      |     |                       |                     |
| 2     | V\$OCT1_06 | 0.813672 | 5953 | (-) | CWNAWTKWSATRYN        | AATATTTATATGCC      |
| M0013 |            |          |      |     |                       |                     |
| 6     | V\$OCT1_02 | 0.801841 | 5956 | (+) | NNGAATATKCANNNN       | ATTTATATGCCATTG     |
| M0016 |            |          |      |     |                       |                     |
| 2     | V\$OCT1_06 | 0.868359 | 5959 | (-) | CWNAWTKWSATRYN        | TATATGCCATTGAA      |
| M0013 |            |          |      |     |                       |                     |
| 7     | V\$OCT1_03 | 0.860529 | 5982 | (-) | NNNRTAATNANNN         | TTTTATTTACCAC       |
| M0016 |            |          |      |     |                       |                     |
| 2     | V\$OCT1_06 | 0.855078 | 5992 | (-) | CWNAWTKWSATRYN        | CACATCACCTTTTT      |
| M0016 |            |          |      |     |                       |                     |
| 2     | V\$OCT1_06 | 0.813672 | 5998 | (+) | CWNAWTKWSATRYN        | ACCTTTTTAATATA      |
| M0016 |            |          |      |     |                       |                     |
| 2     | V\$OCT1_06 | 0.804297 | 6003 | (+) | CWNAWTKWSATRYN        | TTTAATATAATGCT      |
| M0016 |            |          |      |     |                       |                     |
| 2     | V\$OCT1_06 | 0.808594 | 6024 | (-) | CWNAWTKWSATRYN        | AACATCCAAGACCA      |

|       |            |          |      |     |                      |                       |
|-------|------------|----------|------|-----|----------------------|-----------------------|
| M0013 |            |          |      |     | NNNNNNNWATGCAAATNNNW | AAGAAGTAAA-           |
| 8     | V\$OCT1_04 | 0.814931 | 6047 | (+) | NNW                  | GCTAATTAAAAAGA        |
| M0024 |            |          |      |     |                      |                       |
| 8     | V\$OCT1_07 | 0.810049 | 6052 | (+) | TNTATGNTAATT         | GTAAAGCTAATT          |
| M0013 |            |          |      |     | NNNNNNNWATGCAAATNNNW | TAAAGCTAATTAAAA-      |
| 8     | V\$OCT1_04 | 0.812003 | 6053 | (+) | NNW                  | GAAAATAA              |
| M0013 |            |          |      |     |                      |                       |
| 7     | V\$OCT1_03 | 0.847491 | 6056 | (-) | NNNRATAATNANNN       | AGCTAATTAAAAAG        |
| M0024 |            |          |      |     |                      |                       |
| 8     | V\$OCT1_07 | 0.831673 | 6060 | (-) | TNTATGNTAATT         | AATTTAAAGAAA          |
| M0013 |            |          |      |     | NNNNNNNWATGCAAATNNNW | AAAGGTTATTACATTGAT-   |
| 8     | V\$OCT1_04 | 0.820159 | 6074 | (-) | NNW                  | TTAT                  |
| M0013 |            |          |      |     |                      |                       |
| 6     | V\$OCT1_02 | 0.772604 | 6075 | (+) | NNGAATATKCANNNN      | AAGGTTATTACATT        |
| M0016 |            |          |      |     |                      |                       |
| 2     | V\$OCT1_06 | 0.860547 | 6078 | (+) | CWNAWTKWSATRYN       | GTTATTTACATTGA        |
| M0019 |            |          |      |     |                      |                       |
| 5     | V\$OCT1_Q6 | 0.916485 | 6078 | (-) | NNNNATGCAAATNAN      | GTTATTTACATTGAT       |
| M0024 |            |          |      |     |                      |                       |
| 8     | V\$OCT1_07 | 0.817257 | 6080 | (-) | TNTATGNTAATT         | TATTACATTGA           |
| M0016 |            |          |      |     |                      |                       |
| 2     | V\$OCT1_06 | 0.85     | 6100 | (-) | CWNAWTKWSATRYN       | AACATATAAGAATC        |
| M0016 |            |          |      |     |                      |                       |
| 2     | V\$OCT1_06 | 0.826562 | 6108 | (-) | CWNAWTKWSATRYN       | AGAATCTACGGTAG        |
| M0024 |            |          |      |     |                      |                       |
| 8     | V\$OCT1_07 | 0.800085 | 6112 | (+) | TNTATGNTAATT         | TCTACGGTAGTT          |
| M0016 |            |          |      |     |                      |                       |
| 2     | V\$OCT1_06 | 0.893359 | 6131 | (+) | CWNAWTKWSATRYN       | AACTCTGAAATGCA        |
| M0013 |            |          |      |     | NNNNNNNWATGCAAATNNNW | ACTCTGAAATGCAGATTAG-  |
| 8     | V\$OCT1_04 | 0.790673 | 6132 | (+) | NNW                  | TGAG                  |
| M0013 |            |          |      |     |                      |                       |
| 5     | V\$OCT1_01 | 0.7438   | 6134 | (+) | NNNNWTATGCAAATNTNNN  | TCTGAAATGCAGATTAGTG   |
| M0019 |            |          |      |     |                      |                       |
| 5     | V\$OCT1_Q6 | 0.849891 | 6136 | (+) | NNNNATGCAAATNAN      | TGAAATGCAGATTAG       |
| M0013 |            |          |      |     |                      |                       |
| 6     | V\$OCT1_02 | 0.790742 | 6137 | (-) | NNGAATATKCANNNN      | GAAATGCAGATTAGT       |
| M0016 |            |          |      |     |                      |                       |
| 1     | V\$OCT1_05 | 0.886103 | 6137 | (-) | MKNATTTGCATAYY       | GAAATGCAGATTAG        |
| M0016 |            |          |      |     |                      |                       |
| 2     | V\$OCT1_06 | 0.839844 | 6137 | (-) | CWNAWTKWSATRYN       | GAAATGCAGATTAG        |
| M0013 |            |          |      |     | NNNNNNNWATGCAAATNNNW | GATTAG-               |
| 8     | V\$OCT1_04 | 0.81033  | 6145 | (+) | NNW                  | TGAGGTAAATCTCTTGG     |
| M0013 |            |          |      |     |                      |                       |
| 7     | V\$OCT1_03 | 0.840379 | 6193 | (-) | NNNRATAATNANNN       | TTTTCTTATCAC          |
| M0016 |            |          |      |     |                      |                       |
| 2     | V\$OCT1_06 | 0.805859 | 6201 | (+) | CWNAWTKWSATRYN       | ATCACTTGGCTATT        |
| M0016 |            |          |      |     |                      |                       |
| 2     | V\$OCT1_06 | 0.852344 | 6214 | (-) | CWNAWTKWSATRYN       | TGTCTCAAATTTAT        |
| M0013 |            |          |      |     |                      |                       |
| 5     | V\$OCT1_01 | 0.760588 | 6217 | (-) | NNNNWTATGCAAATNTNNN  | CTCAAATTTATATTTTCTT   |
| M0016 |            |          |      |     |                      |                       |
| 2     | V\$OCT1_06 | 0.894531 | 6219 | (+) | CWNAWTKWSATRYN       | CAAATTTATATTTT        |
| M0016 |            |          |      |     |                      |                       |
| 2     | V\$OCT1_06 | 0.821484 | 6219 | (-) | CWNAWTKWSATRYN       | CAAATTTATATTTT        |
| M0019 |            |          |      |     |                      |                       |
| 5     | V\$OCT1_Q6 | 0.815775 | 6219 | (-) | NNNNATGCAAATNAN      | CAAATTTATATTTTC       |
| M0024 |            |          |      |     |                      |                       |
| 8     | V\$OCT1_07 | 0.794149 | 6221 | (-) | TNTATGNTAATT         | AATTTATATTTT          |
| M0013 |            |          |      |     | NNNNNNNWATGCAAATNNNW | TATTTTCTTTGGCATCTATA- |
| 8     | V\$OCT1_04 | 0.839398 | 6227 | (-) | NNW                  | TAT                   |
| M0016 |            |          |      |     |                      |                       |
| 2     | V\$OCT1_06 | 0.855078 | 6237 | (-) | CWNAWTKWSATRYN       | GGCATCTATATATT        |
| M0013 |            |          |      |     |                      |                       |
| 5     | V\$OCT1_01 | 0.750095 | 6244 | (+) | NNNNWTATGCAAATNTNNN  | ATATATTTGGTAATTGTTA   |
| M0024 |            |          |      |     |                      |                       |
| 8     | V\$OCT1_07 | 0.893152 | 6247 | (+) | TNTATGNTAATT         | TATTTGGTAATT          |

|       |            |          |      |     |                      |                       |
|-------|------------|----------|------|-----|----------------------|-----------------------|
| M0013 |            |          |      |     | NNNNNNNWATGCAAATNNNW | ATTGGAATT-GTTATTTACAT |
| 8     | V\$OCT1_04 | 0.796529 | 6248 | (+) | NNW                  |                       |
| M0013 |            |          |      |     | NNNRTAATNANN         | TTGGAATTGTTA          |
| 7     | V\$OCT1_03 | 0.872382 | 6250 | (+) |                      |                       |
| M0016 |            |          |      |     | CWNAWKWSATRYN        | GTAATTGTTATTTT        |
| 2     | V\$OCT1_06 | 0.852734 | 6253 | (+) | NNNNNNNWATGCAAATNNNW | ATTGTTATTTTACATCTGAA- |
| M0013 |            |          |      |     | NNW                  | TAT                   |
| 8     | V\$OCT1_04 | 0.827896 | 6256 | (-) | NNNNNNNWATGCAAATNNNW | ATTTTACATCTGAA-       |
| M0013 |            |          |      |     | NNW                  | TATTTATCA             |
| 8     | V\$OCT1_04 | 0.844207 | 6262 | (-) | NNNNNNNWATGCAAATNNNW | TTTACATCTGAA-         |
| M0013 |            |          |      |     | NNW                  | TATTTATCAT            |
| 8     | V\$OCT1_04 | 0.823714 | 6263 | (+) |                      |                       |
| M0013 |            |          |      |     | NNNNWTATGCAAATNTNNN  | TTTACATCTGAATATTTAT   |
| 5     | V\$OCT1_01 | 0.784433 | 6264 | (-) |                      |                       |
| M0016 |            |          |      |     | CWNAWKWSATRYN        | TACATCTGAATATT        |
| 2     | V\$OCT1_06 | 0.88125  | 6266 | (-) |                      |                       |
| M0013 |            |          |      |     | NNGAATATKCANNNN      | CATCTGAATATTTAT       |
| 6     | V\$OCT1_02 | 0.895777 | 6268 | (-) |                      |                       |
| M0013 |            |          |      |     | NNGAATATKCANNNN      | CTGAATATTTATCAT       |
| 6     | V\$OCT1_02 | 0.857066 | 6271 | (+) | NNNNNNNWATGCAAATNNNW | CTGAA-                |
| M0013 |            |          |      |     | NNW                  | TATTTATCATAAAAAATA    |
| 8     | V\$OCT1_04 | 0.819532 | 6271 | (-) | NNNNNNNWATGCAAATNNNW | GAATATTTATCATAAAAAA-  |
| M0013 |            |          |      |     | NNW                  | TAAA                  |
| 8     | V\$OCT1_04 | 0.808448 | 6273 | (+) | NNNNNNNWATGCAAATNNNW | TATTTATCATAAAAAA-     |
| M0013 |            |          |      |     | NNW                  | TAAAGTT               |
| 8     | V\$OCT1_04 | 0.797365 | 6276 | (+) |                      |                       |
| M0024 |            |          |      |     | TNTATGNTAATT         | ATTTATCATAAA          |
| 8     | V\$OCT1_07 | 0.818741 | 6277 | (-) |                      |                       |
| M0016 |            |          |      |     | CWNAWKWSATRYN        | ATAAAGTTAATTCT        |
| 2     | V\$OCT1_06 | 0.826562 | 6291 | (+) |                      |                       |
| M0024 |            |          |      |     | TNTATGNTAATT         | ATAAAGTTAATT          |
| 8     | V\$OCT1_07 | 0.817045 | 6291 | (+) |                      |                       |
| M0016 |            |          |      |     | CWNAWKWSATRYN        | TAAAGTTAATTCTC        |
| 2     | V\$OCT1_06 | 0.829297 | 6292 | (-) |                      |                       |
| M0016 |            |          |      |     | CWNAWKWSATRYN        | AGGATCACATCATG        |
| 2     | V\$OCT1_06 | 0.825    | 6318 | (-) |                      |                       |
| M0016 |            |          |      |     | CWNAWKWSATRYN        | CATCATGGAAGACA        |
| 2     | V\$OCT1_06 | 0.834375 | 6325 | (+) | NNNNNNNWATGCAAATNNNW | TGTATACTTATGTATTATA-  |
| M0013 |            |          |      |     | NNW                  | CATA                  |
| 8     | V\$OCT1_04 | 0.819532 | 6367 | (-) |                      |                       |
| M0019 |            |          |      |     | NNNNATGCAAATNAN      | ATGCTTTACTTTATC       |
| 5     | V\$OCT1_Q6 | 0.791485 | 6401 | (-) |                      |                       |
| M0016 |            |          |      |     | CWNAWKWSATRYN        | AAGATTGAACTTT         |
| 2     | V\$OCT1_06 | 0.821484 | 6439 | (+) |                      |                       |
| M0024 |            |          |      |     | TNTATGNTAATT         | AGTTAACATTAG          |
| 8     | V\$OCT1_07 | 0.791605 | 6500 | (-) |                      |                       |
| M0016 |            |          |      |     | CWNAWKWSATRYN        | GAATTTGTCATTTA        |
| 2     | V\$OCT1_06 | 0.911328 | 6518 | (+) | NNNNNNNWATGCAAATNNNW | AATTTGTCATTTAAATGA-   |
| M0013 |            |          |      |     | NNW                  | TAATC                 |
| 8     | V\$OCT1_04 | 0.785027 | 6519 | (+) |                      |                       |
| M0016 |            |          |      |     | CWNAWKWSATRYN        | AATTGTCATTTAA         |
| 2     | V\$OCT1_06 | 0.811719 | 6519 | (-) | NNNNNNNWATGCAAATNNNW | ATTTGTCATTTAAATGA-    |
| M0013 |            |          |      |     | NNW                  | TAATCA                |
| 8     | V\$OCT1_04 | 0.813676 | 6520 | (-) |                      |                       |
| M0016 |            |          |      |     | CWNAWKWSATRYN        | GTCATTTAAATGAT        |
| 2     | V\$OCT1_06 | 0.847656 | 6524 | (+) |                      |                       |
| M0016 |            |          |      |     | CWNAWKWSATRYN        | GTCATTTAAATGAT        |
| 2     | V\$OCT1_06 | 0.834766 | 6524 | (-) | NNNNNNNWATGCAAATNNNW | TCATTTAAATGATAATCAG-  |
| M0013 |            |          |      |     | NNW                  | TGAA                  |
| 8     | V\$OCT1_04 | 0.81765  | 6525 | (+) |                      |                       |
| M0019 |            |          |      |     | NNNNATGCAAATNAN      | TTAAATGATAATCAG       |
| 5     | V\$OCT1_Q6 | 0.823417 | 6529 | (+) |                      |                       |
| M0016 |            |          |      |     | MKNATTTGCATAYY       | TAAATGATAATCAG        |
| 1     | V\$OCT1_05 | 0.85904  | 6530 | (-) |                      |                       |
| M0016 |            |          |      |     | CWNAWKWSATRYN        | TAAATGATAATCAG        |
| 2     | V\$OCT1_06 | 0.866016 | 6530 | (-) |                      |                       |

|       |            |          |      |     |                      |                       |
|-------|------------|----------|------|-----|----------------------|-----------------------|
| M0013 |            |          |      |     |                      |                       |
| 7     | V\$OCT1_03 | 0.90004  | 6533 | (+) | NNNRTAATNANNN        | ATGATAATCAGTG         |
| M0016 |            |          |      |     |                      |                       |
| 2     | V\$OCT1_06 | 0.808203 | 6549 | (-) | CWNAWKWSATRYN        | AGTTTGTGAGAGAT        |
| M0016 |            |          |      |     |                      |                       |
| 2     | V\$OCT1_06 | 0.813672 | 6586 | (-) | CWNAWKWSATRYN        | AGAATTCAGAGATG        |
| M0019 |            |          |      |     |                      |                       |
| 5     | V\$OCT1_Q6 | 0.795579 | 6636 | (+) | NNNNATGCAAATNAN      | AGGTATAGAAAGGAC       |
| M0013 |            |          |      |     |                      |                       |
| 7     | V\$OCT1_03 | 0.84275  | 6709 | (-) | NNNRTAATNANNN        | AGCTGGTTACTAG         |
| M0013 |            |          |      |     |                      |                       |
| 7     | V\$OCT1_03 | 0.8629   | 6725 | (+) | NNNRTAATNANNN        | AGTGTAACATAA          |
| M0013 |            |          |      |     |                      |                       |
| 6     | V\$OCT1_02 | 0.787223 | 6740 | (-) | NNGAATATKCANNNN      | GGGCGGAATGTTTAT       |
| M0013 |            |          |      |     |                      |                       |
| 6     | V\$OCT1_02 | 0.792366 | 6743 | (+) | NNGAATATKCANNNN      | CGGAATGTTTATTGG       |
| M0024 |            |          |      |     |                      |                       |
| 8     | V\$OCT1_07 | 0.808141 | 6744 | (+) | TNTATGNTAATT         | GGAATGTTTATT          |
| M0016 |            |          |      |     |                      |                       |
| 1     | V\$OCT1_05 | 0.873651 | 6784 | (+) | MKNATTTGCATAYY       | CTGATTTTCATCCC        |
| M0016 |            |          |      |     |                      |                       |
| 2     | V\$OCT1_06 | 0.873828 | 6784 | (+) | CWNAWKWSATRYN        | CTGATTTTCATCCC        |
| M0019 |            |          |      |     |                      |                       |
| 5     | V\$OCT1_Q6 | 0.847707 | 6784 | (-) | NNNNATGCAAATNAN      | CTGATTTTCATCCCA       |
| M0013 |            |          |      |     | NNNNNNNWATGCAAATNNNW | AGATTTT-              |
| 8     | V\$OCT1_04 | 0.791301 | 6823 | (+) | NNW                  | GTTCTTATTTAATCT       |
| M0016 |            |          |      |     |                      |                       |
| 2     | V\$OCT1_06 | 0.834375 | 6846 | (-) | CWNAWKWSATRYN        | TGTTTGAAAGTGTT        |
| M0016 |            |          |      |     |                      |                       |
| 2     | V\$OCT1_06 | 0.852734 | 6888 | (+) | CWNAWKWSATRYN        | CTGATTTTATTGTA        |
| M0013 |            |          |      |     | NNNNNNNWATGCAAATNNNW | TGATTTTATTGTAATGAGAG- |
| 8     | V\$OCT1_04 | 0.786073 | 6889 | (-) | NNW                  | CAT                   |
| M0024 |            |          |      |     |                      |                       |
| 8     | V\$OCT1_07 | 0.834429 | 6893 | (+) | TNTATGNTAATT         | TTTATTGTAATG          |
| M0013 |            |          |      |     |                      |                       |
| 7     | V\$OCT1_03 | 0.924931 | 6896 | (+) | NNNRTAATNANNN        | ATTGTAATGAGAG         |
| M0013 |            |          |      |     |                      |                       |
| 6     | V\$OCT1_02 | 0.777206 | 6903 | (-) | NNGAATATKCANNNN      | TGAGAGCATAGTGAA       |
| M0016 |            |          |      |     |                      |                       |
| 2     | V\$OCT1_06 | 0.889062 | 6926 | (+) | CWNAWKWSATRYN        | TACATTTAGATGCT        |
| M0016 |            |          |      |     |                      |                       |
| 2     | V\$OCT1_06 | 0.821484 | 6926 | (-) | CWNAWKWSATRYN        | TACATTTAGATGCT        |
| M0019 |            |          |      |     |                      |                       |
| 5     | V\$OCT1_Q6 | 0.799945 | 6997 | (+) | NNNNATGCAAATNAN      | AAATGTGTGAATTCT       |
| M0013 |            |          |      |     | NNNNNNNWATGCAAATNNNW | ATGTGTGAATTCTTATCAG-  |
| 8     | V\$OCT1_04 | 0.806148 | 6999 | (+) | NNW                  | TCCT                  |
| M0013 |            |          |      |     |                      |                       |
| 6     | V\$OCT1_02 | 0.77856  | 7000 | (-) | NNGAATATKCANNNN      | TGTGTGAATTCTTAT       |
| M0016 |            |          |      |     |                      |                       |
| 2     | V\$OCT1_06 | 0.804297 | 7080 | (-) | CWNAWKWSATRYN        | TTCCTGCCATTTAG        |
| M0024 |            |          |      |     |                      |                       |
| 8     | V\$OCT1_07 | 0.804113 | 7107 | (+) | TNTATGNTAATT         | TCTCTGCTCATT          |
| M0013 |            |          |      |     | NNNNNNNWATGCAAATNNNW | AAAAAACATT-           |
| 8     | V\$OCT1_04 | 0.797574 | 7134 | (+) | NNW                  | GCTTATTTATTAA         |
| M0016 |            |          |      |     |                      |                       |
| 2     | V\$OCT1_06 | 0.828906 | 7137 | (+) | CWNAWKWSATRYN        | AAACATTGCTTATT        |
| M0013 |            |          |      |     |                      |                       |
| 6     | V\$OCT1_02 | 0.790742 | 7139 | (-) | NNGAATATKCANNNN      | ACATTGCTTATTTAT       |
| M0013 |            |          |      |     | NNNNNNNWATGCAAATNNNW | ACATTGCTTATTTATTAAAA- |
| 8     | V\$OCT1_04 | 0.800293 | 7139 | (-) | NNW                  | TAA                   |
| M0013 |            |          |      |     | NNNNNNNWATGCAAATNNNW | GCTTATTTATTAAAAATAAA- |
| 8     | V\$OCT1_04 | 0.871602 | 7144 | (+) | NNW                  | GAGT                  |
| M0013 |            |          |      |     |                      |                       |
| 5     | V\$OCT1_01 | 0.731973 | 7146 | (+) | NNNNWTATGCAAATNTNNN  | TTATTTATTAAAAATAAAGA  |
| M0013 |            |          |      |     |                      |                       |
| 5     | V\$OCT1_01 | 0.731973 | 7147 | (-) | NNNNWTATGCAAATNTNNN  | TATTTATTAAAAATAAGAG   |

|       |            |          |      |     |                      |                        |
|-------|------------|----------|------|-----|----------------------|------------------------|
| M0024 |            |          |      |     |                      |                        |
| 8     | V\$OCT1_07 | 0.831673 | 7151 | (-) | TNTATGNTAATT         | TATTAATAATAAA          |
| M0013 |            |          |      |     |                      |                        |
| 7     | V\$OCT1_03 | 0.846306 | 7155 | (+) | NNNRTAATNANNN        | AAAATAAAGAGTA          |
| M0016 |            |          |      |     |                      |                        |
| 2     | V\$OCT1_06 | 0.800391 | 7167 | (-) | CWNAWKWSATRYN        | AAAAAGCAAAATAT         |
| M0016 |            |          |      |     |                      |                        |
| 2     | V\$OCT1_06 | 0.865625 | 7168 | (-) | CWNAWKWSATRYN        | AAAAGCAAAATATG         |
| M0013 |            |          |      |     | NNNNNNNWATGCAAATNNNW | AAGCAAAA-              |
| 8     | V\$OCT1_04 | 0.814304 | 7170 | (-) | NNW                  | TATGTATGAATGTTT        |
| M0013 |            |          |      |     |                      |                        |
| 6     | V\$OCT1_02 | 0.814835 | 7173 | (+) | NNGAATATKCANNNN      | CAAAATATGTATGAA        |
| M0013 |            |          |      |     | NNNNNNNWATGCAAATNNNW | AAAA-                  |
| 8     | V\$OCT1_04 | 0.791092 | 7174 | (-) | NNW                  | TATGTATGAATGTTTAAAA    |
| M0013 |            |          |      |     | NNNNNNNWATGCAAATNNNW | AAA-                   |
| 8     | V\$OCT1_04 | 0.832706 | 7175 | (+) | NNW                  | TATGTATGAATGTTTAAAAAT  |
| M0016 |            |          |      |     |                      |                        |
| 2     | V\$OCT1_06 | 0.855078 | 7176 | (-) | CWNAWKWSATRYN        | AATATGTATGAATG         |
| M0013 |            |          |      |     |                      |                        |
| 6     | V\$OCT1_02 | 0.811586 | 7180 | (-) | NNGAATATKCANNNN      | TGTATGAATGTTTAA        |
| M0013 |            |          |      |     | NNNNNNNWATGCAAATNNNW | GTATGAATGTTTAAAAATGAAC |
| 8     | V\$OCT1_04 | 0.820368 | 7181 | (+) | NNW                  | TA                     |
| M0016 |            |          |      |     |                      |                        |
| 2     | V\$OCT1_06 | 0.833984 | 7386 | (-) | CWNAWKWSATRYN        | AGCCTCAAAAATTT         |
| M0013 |            |          |      |     |                      |                        |
| 5     | V\$OCT1_01 | 0.77852  | 7391 | (-) | NNNNWTATGCAAATNTNNN  | CAAAAATTTGGTTAATCAC    |
| M0013 |            |          |      |     |                      |                        |
| 7     | V\$OCT1_03 | 0.881075 | 7399 | (+) | NNNRTAATNANNN        | TGGTTAATCACGT          |
| M0013 |            |          |      |     |                      |                        |
| 6     | V\$OCT1_02 | 0.862209 | 7419 | (-) | NNGAATATKCANNNN      | GAGATGAATAGTCTG        |
| M0013 |            |          |      |     | NNNNNNNWATGCAAATNNNW | AATAGTCTGTT-           |
| 8     | V\$OCT1_04 | 0.793183 | 7425 | (-) | NNW                  | GCATATTAATAAT          |
| M0013 |            |          |      |     |                      |                        |
| 5     | V\$OCT1_01 | 0.777757 | 7427 | (-) | NNNNWTATGCAAATNTNNN  | TAGTCTGTTGCATATTAAA    |
| M0016 |            |          |      |     |                      |                        |
| 2     | V\$OCT1_06 | 0.821484 | 7429 | (+) | CWNAWKWSATRYN        | GTCTGTTGCATATT         |
| M0013 |            |          |      |     |                      |                        |
| 6     | V\$OCT1_02 | 0.883324 | 7431 | (-) | NNGAATATKCANNNN      | CTGTTGCATATTAAA        |
| M0013 |            |          |      |     | NNNNNNNWATGCAAATNNNW | TGTT-                  |
| 8     | V\$OCT1_04 | 0.823714 | 7432 | (+) | NNW                  | GCATATTAATAATCAATCTT   |
| M0016 |            |          |      |     |                      |                        |
| 2     | V\$OCT1_06 | 0.839844 | 7437 | (-) | CWNAWKWSATRYN        | CATATTAATAATCAA        |
| M0013 |            |          |      |     | NNNNNNNWATGCAAATNNNW | ATCAATCTTTTAAA-        |
| 8     | V\$OCT1_04 | 0.79151  | 7446 | (-) | NNW                  | TATGTCCTT              |
| M0016 |            |          |      |     |                      |                        |
| 2     | V\$OCT1_06 | 0.877734 | 7450 | (+) | CWNAWKWSATRYN        | ATCTTTTAAATATG         |
| M0016 |            |          |      |     |                      |                        |
| 2     | V\$OCT1_06 | 0.804297 | 7450 | (-) | CWNAWKWSATRYN        | ATCTTTTAAATATG         |
| M0016 |            |          |      |     |                      |                        |
| 2     | V\$OCT1_06 | 0.812109 | 7458 | (-) | CWNAWKWSATRYN        | AATATGTCCTTGGG         |
| M0013 |            |          |      |     | NNNNNNNWATGCAAATNNNW | AAAAATTA-              |
| 8     | V\$OCT1_04 | 0.785027 | 7475 | (-) | NNW                  | TATCCACATGCAAAT        |
| M0016 |            |          |      |     |                      |                        |
| 2     | V\$OCT1_06 | 0.819922 | 7475 | (+) | CWNAWKWSATRYN        | AAAAATTATATCCA         |
| M0013 |            |          |      |     |                      |                        |
| 6     | V\$OCT1_02 | 0.776394 | 7478 | (+) | NNGAATATKCANNNN      | AATTATATCCACATG        |
| M0013 |            |          |      |     | NNNNNNNWATGCAAATNNNW | ATATCCACATGCAAA-       |
| 8     | V\$OCT1_04 | 0.898787 | 7482 | (+) | NNW                  | TATAAACA               |
| M0013 |            |          |      |     |                      |                        |
| 5     | V\$OCT1_01 | 0.890309 | 7484 | (+) | NNNNWTATGCAAATNTNNN  | ATCCACATGCAAATATAAA    |
| M0013 |            |          |      |     |                      |                        |
| 6     | V\$OCT1_02 | 0.813481 | 7484 | (+) | NNGAATATKCANNNN      | ATCCACATGCAAATA        |
| M0019 |            |          |      |     |                      |                        |
| 5     | V\$OCT1_Q6 | 0.80595  | 7486 | (+) | NNNNATGCAAATNAN      | CCACATGCAAATATA        |
| M0016 |            |          |      |     |                      |                        |
| 2     | V\$OCT1_06 | 0.876172 | 7487 | (-) | CWNAWKWSATRYN        | CACATGCAAATATA         |

|       |   |            |          |      |     |                              |                              |
|-------|---|------------|----------|------|-----|------------------------------|------------------------------|
| M0013 | 6 | V\$OCT1_02 | 0.805089 | 7521 | (+) | NNGAATATKCANNNN              | AAGAAAACCTCAATAT             |
| M0016 | 2 | V\$OCT1_06 | 0.834375 | 7523 | (-) | CWNAWTKWSATRYN               | GAAAACCTCAATATT              |
| M0016 | 2 | V\$OCT1_06 | 0.821484 | 7531 | (-) | CWNAWTKWSATRYN               | AATATTTCAAAGCA               |
| M0013 | 5 | V\$OCT1_01 | 0.761923 | 7552 | (+) | NNNNWTATGCAAATNTNNN          | TTTAAAAAGCTAATGTAAT          |
| M0016 | 2 | V\$OCT1_06 | 0.847656 | 7560 | (+) | CWNAWTKWSATRYN               | GCTAATGTAATTTT               |
| M0024 | 8 | V\$OCT1_07 | 0.806233 | 7560 | (+) | TNTATGNTAATT                 | GCTAATGTAATT                 |
| M0016 | 2 | V\$OCT1_06 | 0.807031 | 7561 | (-) | CWNAWTKWSATRYN               | CTAATGTAATTTTA               |
| M0016 | 2 | V\$OCT1_06 | 0.805859 | 7566 | (+) | CWNAWTKWSATRYN               | GTAATTTTAGTTCC               |
| M0013 | 8 | V\$OCT1_04 | 0.821205 | 7592 | (+) | NNNNNNNNWATGCAAATNNNW<br>NNW | GTTGTTA-<br>TATTTTAATGTTTCCA |
| M0013 | 8 | V\$OCT1_04 | 0.849017 | 7593 | (-) | NNNNNNNNWATGCAAATNNNW<br>NNW | TTGTTA-<br>TATTTTAATGTTTCCAA |
| M0013 | 5 | V\$OCT1_01 | 0.745135 | 7594 | (+) | NNNNWTATGCAAATNTNNN          | TGTTATATTTTAATGTTTC          |
| M0016 | 2 | V\$OCT1_06 | 0.88125  | 7597 | (+) | CWNAWTKWSATRYN               | TATATTTTAATGTT               |
| M0016 | 2 | V\$OCT1_06 | 0.847656 | 7597 | (-) | CWNAWTKWSATRYN               | TATATTTTAATGTT               |
| M0024 | 8 | V\$OCT1_07 | 0.831673 | 7597 | (+) | TNTATGNTAATT                 | TATATTTTAATG                 |
| M0016 | 2 | V\$OCT1_06 | 0.81875  | 7607 | (-) | CWNAWTKWSATRYN               | TGTTTCCAAGTTAT               |
| M0013 | 7 | V\$OCT1_03 | 0.856974 | 7625 | (+) | NNNRTAATNANNN                | AGCATAAAAAGGG                |
| M0016 | 2 | V\$OCT1_06 | 0.868359 | 7645 | (-) | CWNAWTKWSATRYN               | TGTATGTGAGAATG               |
| M0013 | 6 | V\$OCT1_02 | 0.799404 | 7653 | (-) | NNGAATATKCANNNN              | AGAATGAATGCTCAG              |
| M0016 | 2 | V\$OCT1_06 | 0.800781 | 7665 | (+) | CWNAWTKWSATRYN               | CAGCCTGGGGTTCT               |
| M0013 | 7 | V\$OCT1_03 | 0.874753 | 7715 | (-) | NNNRTAATNANNN                | TCATTTTTATCAC                |
| M0013 | 8 | V\$OCT1_04 | 0.806985 | 7718 | (+) | NNNNNNNNWATGCAAATNNNW<br>NNW | TTTTATCACAAAAATTCAT-<br>ACA  |
| M0016 | 2 | V\$OCT1_06 | 0.831641 | 7720 | (-) | CWNAWTKWSATRYN               | TTTATCACAAAAAT               |
| M0013 | 8 | V\$OCT1_04 | 0.79151  | 7724 | (+) | NNNNNNNNWATGCAAATNNNW<br>NNW | TCACAAAAATTCATA-<br>CACATTTT |
| M0013 | 6 | V\$OCT1_02 | 0.833785 | 7726 | (+) | NNGAATATKCANNNN              | ACAAAAATTCATACA              |
| M0016 | 2 | V\$OCT1_06 | 0.894141 | 7727 | (+) | CWNAWTKWSATRYN               | CAAAAAATTCATACA              |
| M0013 | 8 | V\$OCT1_04 | 0.780845 | 7736 | (-) | NNNNNNNNWATGCAAATNNNW<br>NNW | ATACACATTTTACATTCTAG-<br>TCA |
| M0016 | 2 | V\$OCT1_06 | 0.842187 | 7740 | (+) | CWNAWTKWSATRYN               | ACATTTTACATTCT               |
| M0024 | 8 | V\$OCT1_07 | 0.797965 | 7742 | (-) | TNTATGNTAATT                 | ATTTTACATTCT                 |
| M0013 | 8 | V\$OCT1_04 | 0.796738 | 7769 | (-) | NNNNNNNNWATGCAAATNNNW<br>NNW | TGTGTTTGTTTTAA-<br>TAAAAAATT |
| M0013 | 8 | V\$OCT1_04 | 0.7844   | 7774 | (+) | NNNNNNNNWATGCAAATNNNW<br>NNW | TTGTTTTAATAAAAAATT-<br>GTTTT |
| M0013 | 7 | V\$OCT1_03 | 0.84196  | 7776 | (+) | NNNRTAATNANNN                | GTTTTAATAAAAA                |
| M0013 | 8 | V\$OCT1_04 | 0.78189  | 7831 | (-) | NNNNNNNNWATGCAAATNNNW<br>NNW | CAACATATTTTAAATGAAATT<br>GA  |
| M0016 | 2 | V\$OCT1_06 | 0.834375 | 7835 | (+) | CWNAWTKWSATRYN               | ATATTTTAAATGAA               |



|       |            |          |      |     |                      |                      |
|-------|------------|----------|------|-----|----------------------|----------------------|
| M0019 |            |          |      |     |                      |                      |
| 5     | V\$OCT1_Q6 | 0.790393 | 7840 | (+) | NNNNATGCAAATNAN      | TTAAATGAAATTGAC      |
| M0016 |            |          |      |     |                      |                      |
| 2     | V\$OCT1_06 | 0.924609 | 7841 | (-) | CWNAWKWSATRYN        | TAAATGAAATTGAC       |
| M0016 |            |          |      |     |                      |                      |
| 2     | V\$OCT1_06 | 0.855078 | 7846 | (+) | CWNAWKWSATRYN        | GAAATTGACAGACC       |
| M0013 |            |          |      |     |                      |                      |
| 6     | V\$OCT1_02 | 0.775311 | 7863 | (-) | NNGAATATKCANNNN      | AAAGTACATAGTATT      |
| M0024 |            |          |      |     |                      |                      |
| 8     | V\$OCT1_07 | 0.800297 | 7885 | (+) | TNTATGNTAATT         | TATATACTACTT         |
| M0016 |            |          |      |     |                      |                      |
| 2     | V\$OCT1_06 | 0.852734 | 7894 | (+) | CWNAWKWSATRYN        | CTGTGTTTAATTCT       |
| M0013 |            |          |      |     |                      |                      |
| 5     | V\$OCT1_01 | 0.769172 | 7925 | (+) | NNNNWTATGCAAATNTNNN  | CCCGGTATGAAAGTGTTGGG |
| M0016 |            |          |      |     |                      |                      |
| 2     | V\$OCT1_06 | 0.937891 | 7928 | (-) | CWNAWKWSATRYN        | GGTATGAAAGTGTG       |
| M0016 |            |          |      |     |                      |                      |
| 2     | V\$OCT1_06 | 0.821484 | 7957 | (+) | CWNAWKWSATRYN        | CACTTTTAAAATCA       |
| M0016 |            |          |      |     |                      |                      |
| 2     | V\$OCT1_06 | 0.890625 | 7964 | (-) | CWNAWKWSATRYN        | AAAATCACAGGATC       |
| M0016 |            |          |      |     |                      |                      |
| 1     | V\$OCT1_05 | 0.864851 | 7985 | (+) | MKNATTTGCATAYY       | CTGATTTTCTTTTT       |
| M0016 |            |          |      |     |                      |                      |
| 2     | V\$OCT1_06 | 0.852734 | 7985 | (+) | CWNAWKWSATRYN        | CTGATTTTCTTTTT       |
| M0019 |            |          |      |     |                      |                      |
| 5     | V\$OCT1_Q6 | 0.849618 | 7985 | (-) | NNNNATGCAAATNAN      | CTGATTTTCTTTTTT      |
| M0016 |            |          |      |     |                      |                      |
| 2     | V\$OCT1_06 | 0.812109 | 8036 | (-) | CWNAWKWSATRYN        | GGTAAATCATTTTG       |
| M0016 |            |          |      |     |                      |                      |
| 1     | V\$OCT1_05 | 0.853561 | 8041 | (+) | MKNATTTGCATAYY       | ATCATTTTGATGTC       |
| M0016 |            |          |      |     |                      |                      |
| 2     | V\$OCT1_06 | 0.916797 | 8041 | (+) | CWNAWKWSATRYN        | ATCATTTTGATGTC       |
| M0013 |            |          |      |     | NNNNNNNWATGCAAATNNNW | TCATTTT-             |
| 8     | V\$OCT1_04 | 0.822041 | 8042 | (+) | NNW                  | GATGTCAATTCATTAT     |
| M0024 |            |          |      |     |                      |                      |
| 8     | V\$OCT1_07 | 0.800933 | 8047 | (+) | TNTATGNTAATT         | TTGATGTCAATT         |
| M0013 |            |          |      |     |                      |                      |
| 7     | V\$OCT1_03 | 0.920585 | 8055 | (-) | NNNRTAATNANNN        | AATTCATTATCCC        |
| M0013 |            |          |      |     |                      |                      |
| 5     | V\$OCT1_01 | 0.751049 | 8057 | (+) | NNNNWTATGCAAATNTNNN  | TTCATTATCCCAATCAGAA  |
| M0019 |            |          |      |     |                      |                      |
| 5     | V\$OCT1_Q6 | 0.803766 | 8059 | (+) | NNNNATGCAAATNAN      | CATTATCCCAATCAG      |
| M0016 |            |          |      |     |                      |                      |
| 2     | V\$OCT1_06 | 0.858203 | 8060 | (-) | CWNAWKWSATRYN        | ATTATCCCAATCAG       |
| M0013 |            |          |      |     |                      |                      |
| 7     | V\$OCT1_03 | 0.850257 | 8063 | (+) | NNNRTAATNANNN        | ATCCCAATCAGAA        |
| M0013 |            |          |      |     | NNNNNNNWATGCAAATNNNW | ATCAGAAAATGTTTATGAAA |
| 8     | V\$OCT1_04 | 0.788164 | 8069 | (+) | NNW                  | GCT                  |
| M0013 |            |          |      |     |                      |                      |
| 7     | V\$OCT1_03 | 0.891347 | 8075 | (-) | NNNRTAATNANNN        | AAATGTTTATGAA        |
| M0013 |            |          |      |     | NNNNNNNWATGCAAATNNNW | AAATGTTTATGAAA-      |
| 8     | V\$OCT1_04 | 0.809494 | 8075 | (+) | NNW                  | GCTTATTGT            |
| M0013 |            |          |      |     | NNNNNNNWATGCAAATNNNW | CCATGAAGTTTACATATCC- |
| 8     | V\$OCT1_04 | 0.780217 | 8099 | (-) | NNW                  | TACA                 |
| M0013 |            |          |      |     |                      |                      |
| 5     | V\$OCT1_01 | 0.807325 | 8101 | (-) | NNNNWTATGCAAATNTNNN  | ATGAAGTTTACATATCCTA  |
| M0016 |            |          |      |     |                      |                      |
| 2     | V\$OCT1_06 | 0.862891 | 8103 | (+) | CWNAWKWSATRYN        | GAAGTTTACATATC       |
| M0019 |            |          |      |     |                      |                      |
| 5     | V\$OCT1_Q6 | 0.794487 | 8103 | (-) | NNNNATGCAAATNAN      | GAAGTTTACATATCC      |
| M0013 |            |          |      |     |                      |                      |
| 6     | V\$OCT1_02 | 0.800758 | 8105 | (-) | NNGAATATKCANNNN      | AGTTTACATATCCTA      |
| M0024 |            |          |      |     |                      |                      |
| 8     | V\$OCT1_07 | 0.833369 | 8105 | (-) | TNTATGNTAATT         | AGTTTACATATC         |
| M0013 |            |          |      |     |                      |                      |
| 7     | V\$OCT1_03 | 0.849467 | 8124 | (-) | NNNRTAATNANNN        | GTCTGATTGCACA        |

|       |            |          |      |     |                      |                         |
|-------|------------|----------|------|-----|----------------------|-------------------------|
| M0013 |            |          |      |     |                      |                         |
| 5     | V\$OCT1_01 | 0.764403 | 8137 | (-) | NNNNWTATGCAAATNTNNN  | AGGCACTTTGTATACAGCA     |
| M0019 |            |          |      |     |                      |                         |
| 5     | V\$OCT1_Q6 | 0.829967 | 8139 | (-) | NNNNATGCAAATNAN      | GCACTTTGTATACAG         |
| M0013 |            |          |      |     |                      |                         |
| 7     | V\$OCT1_03 | 0.850257 | 8159 | (-) | NNNRTAATNANNN        | TCCTCATTTTGAC           |
| M0016 |            |          |      |     |                      |                         |
| 2     | V\$OCT1_06 | 0.857812 | 8161 | (+) | CWNAWKWSATRYN        | CTCATTTTGACACA          |
| M0016 |            |          |      |     |                      |                         |
| 2     | V\$OCT1_06 | 0.867969 | 8163 | (+) | CWNAWKWSATRYN        | CATTTTGACACACA          |
| M0013 |            |          |      |     | NNNNNNNWATGCAAATNNNW | TGACACACATGGA-          |
| 8     | V\$OCT1_04 | 0.799875 | 8168 | (+) | NNW                  | TATCAACCCA              |
| M0016 |            |          |      |     |                      |                         |
| 2     | V\$OCT1_06 | 0.826953 | 8171 | (+) | CWNAWKWSATRYN        | CACACATGGATATC          |
| M0013 |            |          |      |     |                      |                         |
| 6     | V\$OCT1_02 | 0.791554 | 8173 | (-) | NNGAATATKCANNNN      | CACATGGATATCAAC         |
| M0013 |            |          |      |     | NNNNNNNWATGCAAATNNNW | ACAGATGTATGAAAACAAA-    |
| 8     | V\$OCT1_04 | 0.81995  | 8191 | (+) | NNW                  | TATT                    |
| M0016 |            |          |      |     |                      |                         |
| 2     | V\$OCT1_06 | 0.803906 | 8196 | (-) | CWNAWKWSATRYN        | TGTATGAAAACAAA          |
| M0016 |            |          |      |     |                      |                         |
| 2     | V\$OCT1_06 | 0.808203 | 8201 | (-) | CWNAWKWSATRYN        | GAAAACAAATATTT          |
| M0016 |            |          |      |     |                      |                         |
| 2     | V\$OCT1_06 | 0.808203 | 8210 | (-) | CWNAWKWSATRYN        | TATTTGTCAGAGAC          |
| M0013 |            |          |      |     |                      |                         |
| 7     | V\$OCT1_03 | 0.858949 | 8222 | (-) | NNNRTAATNANNN        | ACAAAATTACAGA           |
| M0016 |            |          |      |     |                      |                         |
| 2     | V\$OCT1_06 | 0.825    | 8223 | (+) | CWNAWKWSATRYN        | CAAAATTACAGAAT          |
| M0016 |            |          |      |     |                      |                         |
| 2     | V\$OCT1_06 | 0.877734 | 8224 | (-) | CWNAWKWSATRYN        | AAAATTACAGAATT          |
| M0016 |            |          |      |     |                      |                         |
| 2     | V\$OCT1_06 | 0.826562 | 8264 | (+) | CWNAWKWSATRYN        | CTATCTGTGCTGCC          |
| M0013 |            |          |      |     | NNNNNNNWATGCAAATNNNW |                         |
| 8     | V\$OCT1_04 | 0.851736 | 8281 | (-) | NNW                  | ACATTTTTTTTCTCTAATTTTTT |
| M0013 |            |          |      |     |                      |                         |
| 5     | V\$OCT1_01 | 0.731591 | 8285 | (+) | NNNNWTATGCAAATNTNNN  | TTTTTTTCTCTAATTTTTT     |
| M0024 |            |          |      |     |                      |                         |
| 8     | V\$OCT1_07 | 0.800297 | 8288 | (+) | TNTATGNTAATT         | TTTTTCTCTAATT           |
| M0013 |            |          |      |     |                      |                         |
| 7     | V\$OCT1_03 | 0.845121 | 8291 | (+) | NNNRTAATNANNN        | TTCCTAATTTTTT           |
| M0016 |            |          |      |     |                      |                         |
| 2     | V\$OCT1_06 | 0.878906 | 8313 | (+) | CWNAWKWSATRYN        | CAGATTTTGATAGA          |
| M0013 |            |          |      |     | NNNNNNNWATGCAAATNNNW | ACTAAATCTT-             |
| 8     | V\$OCT1_04 | 0.788791 | 8327 | (-) | NNW                  | GTCATTAAAAAATT          |
| M0016 |            |          |      |     |                      |                         |
| 2     | V\$OCT1_06 | 0.834375 | 8331 | (+) | CWNAWKWSATRYN        | AATCTTGTCATTAA          |
| M0013 |            |          |      |     |                      |                         |
| 7     | V\$OCT1_03 | 0.879099 | 8335 | (-) | NNNRTAATNANNN        | TTGTCATTAAAAA           |
| M0016 |            |          |      |     |                      |                         |
| 2     | V\$OCT1_06 | 0.896094 | 8344 | (-) | CWNAWKWSATRYN        | AAAATTACAGTAAT          |
| M0024 |            |          |      |     |                      |                         |
| 8     | V\$OCT1_07 | 0.815137 | 8346 | (-) | TNTATGNTAATT         | AATTACAGTAAT            |
| M0013 |            |          |      |     | NNNNNNNWATGCAAATNNNW | TTACAGTAATGGC-          |
| 8     | V\$OCT1_04 | 0.791928 | 8348 | (+) | NNW                  | TATGTTTCTA              |
| M0016 |            |          |      |     |                      |                         |
| 2     | V\$OCT1_06 | 0.826562 | 8378 | (-) | CWNAWKWSATRYN        | GATATCAACATGTT          |
| M0013 |            |          |      |     |                      |                         |
| 7     | V\$OCT1_03 | 0.86369  | 8420 | (+) | NNNRTAATNANNN        | AGGCTAATCAGAC           |
| M0016 |            |          |      |     |                      |                         |
| 2     | V\$OCT1_06 | 0.821875 | 8430 | (+) | CWNAWKWSATRYN        | GACACTGGAATCCT          |
| M0016 |            |          |      |     |                      |                         |
| 2     | V\$OCT1_06 | 0.805859 | 8499 | (+) | CWNAWKWSATRYN        | CTTCCTTTAACTTT          |
| M0016 |            |          |      |     |                      |                         |
| 2     | V\$OCT1_06 | 0.911719 | 8518 | (+) | CWNAWKWSATRYN        | AAGACTTTCATTCA          |
| M0013 |            |          |      |     | NNNNNNNWATGCAAATNNNW | AGACTTTCATTCAAGTTACAA   |
| 8     | V\$OCT1_04 | 0.787537 | 8519 | (+) | NNW                  | AA                      |

|       |            |          |      |     |                       |                      |
|-------|------------|----------|------|-----|-----------------------|----------------------|
| M0016 |            |          |      |     |                       |                      |
| 2     | V\$OCT1_06 | 0.826953 | 8524 | (-) | CWNAWKWSATRYN         | TTCATTCAAGTTAC       |
| M0013 |            |          |      |     | NNNNNNNNWATGCAAATNNNW | TCATTCAAGTTACAAAA-   |
| 8     | V\$OCT1_04 | 0.782518 | 8525 | (-) | NNW                   | TAAAAAC              |
| M0024 |            |          |      |     |                       |                      |
| 8     | V\$OCT1_07 | 0.800933 | 8566 | (+) | TNTATGNTAATT          | TTTCTGGGAATT         |
| M0013 |            |          |      |     |                       |                      |
| 6     | V\$OCT1_02 | 0.8817   | 8583 | (-) | NNGAATATKCANNNN       | AAAGTGAATATTTC       |
| M0013 |            |          |      |     |                       |                      |
| 6     | V\$OCT1_02 | 0.800487 | 8586 | (+) | NNGAATATKCANNNN       | GTGAATATTTCACAT      |
| M0016 |            |          |      |     |                       |                      |
| 2     | V\$OCT1_06 | 0.828906 | 8588 | (+) | CWNAWKWSATRYN         | GAATATTTCACATC       |
| M0016 |            |          |      |     |                       |                      |
| 2     | V\$OCT1_06 | 0.821484 | 8589 | (-) | CWNAWKWSATRYN         | AATATTTCACATCC       |
| M0013 |            |          |      |     |                       |                      |
| 6     | V\$OCT1_02 | 0.773146 | 8612 | (-) | NNGAATATKCANNNN       | ATTCTGAATAACTTC      |
| M0016 |            |          |      |     |                       |                      |
| 2     | V\$OCT1_06 | 0.857812 | 8663 | (+) | CWNAWKWSATRYN         | GAGTATAACATGCA       |
| M0016 |            |          |      |     |                       |                      |
| 2     | V\$OCT1_06 | 0.834375 | 8664 | (-) | CWNAWKWSATRYN         | AGTATAACATGCAC       |
| M0013 |            |          |      |     |                       |                      |
| 6     | V\$OCT1_02 | 0.791554 | 8666 | (+) | NNGAATATKCANNNN       | TATAACATGCACCTC      |
| M0016 |            |          |      |     |                       |                      |
| 2     | V\$OCT1_06 | 0.855078 | 8675 | (-) | CWNAWKWSATRYN         | CACCTCAAATTATT       |
| M0013 |            |          |      |     |                       |                      |
| 7     | V\$OCT1_03 | 0.841169 | 8678 | (-) | NNNRTAATNANNN         | CTCAAATTATTCA        |
| M0013 |            |          |      |     |                       |                      |
| 6     | V\$OCT1_02 | 0.83595  | 8680 | (+) | NNGAATATKCANNNN       | CAAATTATTCATCTT      |
| M0016 |            |          |      |     |                       |                      |
| 2     | V\$OCT1_06 | 0.828906 | 8729 | (+) | CWNAWKWSATRYN         | GTTTATTACAGTTA       |
| M0016 |            |          |      |     |                       |                      |
| 2     | V\$OCT1_06 | 0.858203 | 8730 | (-) | CWNAWKWSATRYN         | TTTATTACAGTTAG       |
| M0013 |            |          |      |     |                       |                      |
| 7     | V\$OCT1_03 | 0.86448  | 8760 | (+) | NNNRTAATNANNN         | TGGTTAATTAGTA        |
| M0019 |            |          |      |     |                       |                      |
| 5     | V\$OCT1_Q6 | 0.814138 | 8763 | (-) | NNNNATGCAAATNAN       | TTAATTAGTATTCTT      |
| M0024 |            |          |      |     |                       |                      |
| 8     | V\$OCT1_07 | 0.829765 | 8765 | (-) | TNTATGNTAATT          | AATTAGTATTCT         |
| M0013 |            |          |      |     |                       |                      |
| 6     | V\$OCT1_02 | 0.797239 | 8766 | (+) | NNGAATATKCANNNN       | ATTAGTATTCTTACC      |
| M0016 |            |          |      |     |                       |                      |
| 2     | V\$OCT1_06 | 0.842187 | 8776 | (+) | CWNAWKWSATRYN         | TTACCTGAAATGTA       |
| M0013 |            |          |      |     | NNNNNNNNWATGCAAATNNNW | TACCTGAAATGTAAATTAA- |
| 8     | V\$OCT1_04 | 0.844207 | 8777 | (+) | NNW                   | TAAA                 |
| M0013 |            |          |      |     |                       |                      |
| 5     | V\$OCT1_01 | 0.758871 | 8779 | (+) | NNNNWTATGCAAATNTNNN   | CCTGAAATGTAAATTAATA  |
| M0019 |            |          |      |     |                       |                      |
| 5     | V\$OCT1_Q6 | 0.85262  | 8781 | (+) | NNNNATGCAAATNAN       | TGAAATGTAAATTAA      |
| M0016 |            |          |      |     |                       |                      |
| 2     | V\$OCT1_06 | 0.868359 | 8782 | (-) | CWNAWKWSATRYN         | GAAATGTAAATTAA       |
| M0024 |            |          |      |     |                       |                      |
| 8     | V\$OCT1_07 | 0.877252 | 8782 | (+) | TNTATGNTAATT          | GAAATGTAAATT         |
| M0013 |            |          |      |     | NNNNNNNNWATGCAAATNNNW | AAATGTAAATTAA-       |
| 8     | V\$OCT1_04 | 0.81995  | 8783 | (+) | NNW                   | TAAATCAAAA           |
| M0016 |            |          |      |     |                       |                      |
| 2     | V\$OCT1_06 | 0.800391 | 8788 | (-) | CWNAWKWSATRYN         | TAAATTAATAAAATC      |
| M0013 |            |          |      |     | NNNNNNNNWATGCAAATNNNW | ATTAA-               |
| 8     | V\$OCT1_04 | 0.790464 | 8791 | (+) | NNW                   | TAAATCAAAAAACTAACA   |
| M0016 |            |          |      |     |                       |                      |
| 2     | V\$OCT1_06 | 0.882812 | 8796 | (-) | CWNAWKWSATRYN         | TAAATCAAAAAACT       |
| M0024 |            |          |      |     |                       |                      |
| 8     | V\$OCT1_07 | 0.808141 | 8806 | (-) | TNTATGNTAATT          | AACTAACATGGC         |
| M0016 |            |          |      |     |                       |                      |
| 2     | V\$OCT1_06 | 0.870703 | 8809 | (+) | CWNAWKWSATRYN         | TAACATGGCATGTT       |
| M0016 |            |          |      |     |                       |                      |
| 2     | V\$OCT1_06 | 0.870703 | 8810 | (-) | CWNAWKWSATRYN         | AACATGGCATGTTT       |

|       |   |            |          |      |     |                       |                        |
|-------|---|------------|----------|------|-----|-----------------------|------------------------|
| M0016 | 2 | V\$OCT1_06 | 0.88125  | 8817 | (+) | CWNAWTKWSATRYN        | CATGTTTTAATGTT         |
| M0016 | 2 | V\$OCT1_06 | 0.826562 | 8827 | (-) | CWNAWTKWSATRYN        | TGTTTTTAAGGAAG         |
| M0013 | 7 | V\$OCT1_03 | 0.886606 | 8866 | (-) | NNNRTAATNANNN         | ATATATTTACCAA          |
| M0013 | 8 | V\$OCT1_04 | 0.79381  | 8871 | (+) | NNNNNNNNWATGCAAATNNNW | TTTAC-                 |
| M0013 | 8 | V\$OCT1_04 | 0.7844   | 8873 | (-) | NNNNNNNNWATGCAAATNNNW | CAAATTTAAAAATATATTA    |
| M0013 | 5 | V\$OCT1_01 | 0.731782 | 8875 | (-) | NNNNWTATGCAAATNTNNN   | TAC-                   |
| M0016 | 2 | V\$OCT1_06 | 0.877734 | 8876 | (-) | CWNAWTKWSATRYN        | CAAATTTAAAAATATATTAGC  |
| M0016 | 2 | V\$OCT1_06 | 0.834375 | 8877 | (+) | CWNAWTKWSATRYN        | CCAAATTTAAAAATATATTA   |
| M0024 | 8 | V\$OCT1_07 | 0.831673 | 8879 | (-) | TNTATGNTAATT          | CAAATTTAAAAATAT        |
| M0013 | 8 | V\$OCT1_04 | 0.843998 | 8883 | (-) | NNNNNNNNWATGCAAATNNNW | AAATTTAAAAATATA        |
| M0013 | 5 | V\$OCT1_01 | 0.856925 | 8885 | (-) | NNNNWTATGCAAATNTNNN   | ATTTAAAAATATA          |
| M0024 | 8 | V\$OCT1_07 | 0.823829 | 8889 | (-) | TNTATGNTAATT          | AAAATATATTAG-          |
| M0013 | 7 | V\$OCT1_03 | 0.845121 | 8891 | (-) | NNNRTAATNANNN         | CATTATCCAGG            |
| M0013 | 6 | V\$OCT1_02 | 0.777748 | 8893 | (+) | NNGAATATKCANNNN       | AATATATTAGCATTATCCA    |
| M0013 | 8 | V\$OCT1_04 | 0.780845 | 8900 | (+) | NNNNNNNNWATGCAAATNNNW | TATTAGCATTAT           |
| M0013 | 5 | V\$OCT1_01 | 0.793209 | 8902 | (+) | NNNNWTATGCAAATNTNNN   | TTAGCATTATCCA          |
| M0013 | 8 | V\$OCT1_04 | 0.786909 | 8902 | (+) | NNNNNNNNWATGCAAATNNNW | AGCATTATCCAGGAT        |
| M0016 | 2 | V\$OCT1_06 | 0.842187 | 8905 | (-) | CWNAWTKWSATRYN        | TCCAGGA-               |
| M0013 | 8 | V\$OCT1_04 | 0.815767 | 8909 | (-) | NNNNNNNNWATGCAAATNNNW | TATGTTAAAAATTTAAT      |
| M0013 | 6 | V\$OCT1_02 | 0.770709 | 8910 | (+) | NNGAATATKCANNNN       | CAGGATATGTAAAAATTTA    |
| M0016 | 2 | V\$OCT1_06 | 0.868359 | 8913 | (-) | CWNAWTKWSATRYN        | CAGGA-                 |
| M0024 | 8 | V\$OCT1_07 | 0.807717 | 8915 | (-) | TNTATGNTAATT          | TATGTTAAAAATTTAATTA    |
| M0013 | 7 | V\$OCT1_03 | 0.846701 | 8916 | (-) | NNNRTAATNANNN         | GATATGTTAAAAATT        |
| M0013 | 8 | V\$OCT1_04 | 0.80092  | 8940 | (-) | NNNNNNNNWATGCAAATNNNW | TGTTAAAAATTTAATTAAACAA |
| M0013 | 5 | V\$OCT1_01 | 0.735979 | 8942 | (-) | NNNNWTATGCAAATNTNNN   | TT                     |
| M0016 | 2 | V\$OCT1_06 | 0.876172 | 8952 | (+) | CWNAWTKWSATRYN        | GTAAAAATTTAATTA        |
| M0016 | 2 | V\$OCT1_06 | 0.842187 | 8953 | (-) | CWNAWTKWSATRYN        | AAAATTTAATTAAA         |
| M0013 | 6 | V\$OCT1_02 | 0.773687 | 8970 | (+) | NNGAATATKCANNNN       | AATTTAATTAAA           |
| M0013 | 8 | V\$OCT1_04 | 0.791301 | 8995 | (-) | NNNNNNNNWATGCAAATNNNW | ATTTAATTAAACA          |
| M0013 | 8 | V\$OCT1_04 | 0.833333 | 8999 | (+) | NNNNNNNNWATGCAAATNNNW | TTTTTTTTTTAG-          |
| M0013 | 7 | V\$OCT1_03 | 0.852232 | 9002 | (-) | NNNRTAATNANNN         | CAGAAGGACAT            |
| M0016 | 2 | V\$OCT1_06 | 0.826562 | 9004 | (-) | CWNAWTKWSATRYN        | TTTTTTTTAGCAGAAGGAC    |
| M0013 | 8 | V\$OCT1_04 | 0.787746 | 9015 | (+) | NNNW                  | CAGAAGGACATTCT         |
|       |   |            |          |      |     |                       | AGAAGGACATTCTC         |
|       |   |            |          |      |     |                       | GAAGATATGCCCTCC        |
|       |   |            |          |      |     |                       | TGG-                   |
|       |   |            |          |      |     |                       | TAAAAATTTTATTTAAAGTTT  |
|       |   |            |          |      |     |                       | AAAATTTTATTTAAAGTTTAT  |
|       |   |            |          |      |     |                       | CA                     |
|       |   |            |          |      |     |                       | ATTTTATTTAAAG          |
|       |   |            |          |      |     |                       | TTTATTTAAAGTTT         |
|       |   |            |          |      |     |                       | TTATCAAAGGCAAAGGTAA    |
|       |   |            |          |      |     |                       | CAA                    |

|       |   |            |          |      |     |                       |                       |
|-------|---|------------|----------|------|-----|-----------------------|-----------------------|
| M0013 | 7 | V\$OCT1_03 | 0.840379 | 9028 | (+) | NNNRTAATNANNN         | AAGGTAACAAGGA         |
| M0019 | 5 | V\$OCT1_Q6 | 0.818504 | 9037 | (+) | NNNNATGCAAATNAN       | AGGAATGAGAAGAAC       |
| M0016 | 2 | V\$OCT1_06 | 0.813672 | 9038 | (-) | CWNAWTKWSATRYN        | GGAATGAGAAGAAC        |
| M0013 | 8 | V\$OCT1_04 | 0.820577 | 9088 | (+) | NNNNNNNNWATGCAAATNNNW | AAACATTAATTCATAGTAAGT |
| M0016 | 2 | V\$OCT1_06 | 0.821094 | 9117 | (+) | NNW                   | AA                    |
| M0016 | 2 | V\$OCT1_06 | 0.81875  | 9162 | (+) | CWNAWTKWSATRYN        | AGACTCTAGATGTT        |
| M0016 | 2 | V\$OCT1_06 | 0.890625 | 9169 | (-) | CWNAWTKWSATRYN        | CTTTTTTAAATCT         |
| M0016 | 2 | V\$OCT1_06 | 0.864844 | 9177 | (+) | CWNAWTKWSATRYN        | TAAATCTCAGGTAT        |
| M0016 | 2 | V\$OCT1_06 | 0.911719 | 9178 | (-) | CWNAWTKWSATRYN        | AGGTATTTAATTCA        |
| M0016 | 2 | V\$OCT1_06 | 0.841797 | 9181 | (+) | CWNAWTKWSATRYN        | GGTATTTAATTCAT        |
| M0016 | 2 | V\$OCT1_06 | 0.868359 | 9189 | (+) | CWNAWTKWSATRYN        | ATTTAATTCATGCT        |
| M0013 | 8 | V\$OCT1_04 | 0.814931 | 9190 | (+) | NNNNNNNNWATGCAAATNNNW | CATGCTTTTCATTTA       |
| M0013 | 8 | V\$OCT1_04 | 0.798202 | 9191 | (-) | NNW                   | ATGCTTTTCATTTAAA-     |
| M0013 | 5 | V\$OCT1_01 | 0.763449 | 9193 | (-) | NNNNNNNNWATGCAAATNNNW | TATTGTGT              |
| M0016 | 2 | V\$OCT1_06 | 0.860547 | 9195 | (+) | NNNNNNNNWATGCAAATNNNW | TGCTTTTCATTTAAA-      |
| M0016 | 2 | V\$OCT1_06 | 0.868359 | 9195 | (-) | NNW                   | TATTGTGTT             |
| M0019 | 5 | V\$OCT1_Q6 | 0.792031 | 9195 | (-) | NNNNWTATGCAAATNTNNN   | CTTTCATTTAAATATTGTG   |
| M0013 | 6 | V\$OCT1_02 | 0.804548 | 9197 | (-) | CWNAWTKWSATRYN        | TTCATTTAAATATT        |
| M0016 | 2 | V\$OCT1_06 | 0.839453 | 9203 | (+) | CWNAWTKWSATRYN        | TTCATTTAAATATT        |
| M0016 | 2 | V\$OCT1_06 | 0.808594 | 9244 | (-) | CWNAWTKWSATRYN        | TTCATTTAAATATT        |
| M0013 | 8 | V\$OCT1_04 | 0.780217 | 9347 | (-) | NNNNNNNNWATGCAAATNNNW | TTCAATTTAAATATTG      |
| M0016 | 2 | V\$OCT1_06 | 0.826953 | 9351 | (+) | NNGAATATKCANNNN       | CATTTAAATATTGTG       |
| M0016 | 2 | V\$OCT1_06 | 0.839844 | 9357 | (-) | CWNAWTKWSATRYN        | AATATTGTGTTTTA        |
| M0013 | 8 | V\$OCT1_04 | 0.820577 | 9360 | (+) | CWNAWTKWSATRYN        | GGTATTTAAAGGGT        |
| M0016 | 2 | V\$OCT1_06 | 0.88125  | 9365 | (-) | NNNNNNNNWATGCAAATNNNW | GCC-                  |
| M0024 | 8 | V\$OCT1_07 | 0.834429 | 9367 | (-) | NNW                   | TATAACTTAAATTATAAAAT  |
| M0013 | 8 | V\$OCT1_04 | 0.823505 | 9369 | (-) | CWNAWTKWSATRYN        | ATAACTTAAATTAT        |
| M0013 | 8 | V\$OCT1_04 | 0.793392 | 9371 | (+) | CWNAWTKWSATRYN        | TAAATTATAAAATG        |
| M0013 | 7 | V\$OCT1_03 | 0.88305  | 9373 | (+) | NNNNNNNNWATGCAAATNNNW | ATTATAAAATGACAA-      |
| M0013 | 8 | V\$OCT1_04 | 0.883103 | 9374 | (+) | NNW                   | TATAATAA              |
| M0013 | 7 | V\$OCT1_03 | 0.868036 | 9376 | (+) | CWNAWTKWSATRYN        | AAAATGACAATATA        |
| M0013 | 6 | V\$OCT1_02 | 0.818896 | 9379 | (-) | TNTATGNTAATT          | AATGACAATATA          |
| M0013 | 6 | V\$OCT1_02 | 0.792907 | 9382 | (+) | NNNNNNNNWATGCAAATNNNW | TGACAATATAATAATAAA-   |
| M0013 | 6 | V\$OCT1_02 | 0.792907 | 9382 | (+) | NNW                   | TATTA                 |
| M0013 | 6 | V\$OCT1_02 | 0.792907 | 9382 | (+) | NNNNNNNNWATGCAAATNNNW | ACAATATAATAATAAA-     |
| M0013 | 6 | V\$OCT1_02 | 0.792907 | 9382 | (+) | NNW                   | TATTA                 |
| M0013 | 6 | V\$OCT1_02 | 0.792907 | 9382 | (+) | NNNRTAATNANNN         | AATATAATAATAA         |
| M0013 | 6 | V\$OCT1_02 | 0.792907 | 9382 | (+) | NNNNNNNNWATGCAAATNNNW | ATATAATAATAAA-        |
| M0013 | 6 | V\$OCT1_02 | 0.792907 | 9382 | (+) | NNW                   | TATTAAATGA            |
| M0013 | 6 | V\$OCT1_02 | 0.792907 | 9382 | (+) | NNNRTAATNANNN         | ATAATAATAAATA         |
| M0013 | 6 | V\$OCT1_02 | 0.792907 | 9382 | (+) | NNGAATATKCANNNN       | ATAATAAATATTAAA       |
| M0013 | 6 | V\$OCT1_02 | 0.792907 | 9382 | (+) | NNGAATATKCANNNN       | ATAAATATTAAATGA       |

|       |   |            |          |      |     |                       |                           |
|-------|---|------------|----------|------|-----|-----------------------|---------------------------|
| M0016 | 2 | V\$OCT1_06 | 0.85     | 9384 | (+) | CWNAWTKWSATRYN        | AAATATTAAATGAT            |
| M0016 | 2 | V\$OCT1_06 | 0.9375   | 9385 | (-) | CWNAWTKWSATRYN        | AATATTAAATGATG            |
| M0013 | 8 | V\$OCT1_04 | 0.819741 | 9388 | (+) | NNNNNNNNWATGCAAATNNNW | ATTAAATGATGTAAA-GCAATTAA  |
| M0019 | 5 | V\$OCT1_Q6 | 0.818777 | 9392 | (+) | NNNNATGCAAATNAN       | AATGATGTAAAGCAA           |
| M0016 | 2 | V\$OCT1_06 | 0.816016 | 9401 | (+) | CWNAWTKWSATRYN        | AAGCAATTAATGCA            |
| M0019 | 5 | V\$OCT1_Q6 | 0.796124 | 9406 | (+) | NNNNATGCAAATNAN       | ATTAATGCAATCCAT           |
| M0016 | 2 | V\$OCT1_06 | 0.81875  | 9452 | (-) | CWNAWTKWSATRYN        | AGTATCAGAAACAT            |
| M0016 | 2 | V\$OCT1_06 | 0.852734 | 9482 | (+) | CWNAWTKWSATRYN        | CTTCATCTAATATT            |
| M0016 | 2 | V\$OCT1_06 | 0.862891 | 9483 | (-) | CWNAWTKWSATRYN        | TTCATCTAATATTTC           |
| M0013 | 6 | V\$OCT1_02 | 0.77098  | 9484 | (-) | NNGAATATKCANNNN       | TCATCTAATATTCTG           |
| M0013 | 5 | V\$OCT1_01 | 0.768409 | 9487 | (+) | NNNNWTATGCAAATNTNNN   | TCTAATATTCTGATTCAA        |
| M0013 | 6 | V\$OCT1_02 | 0.811857 | 9487 | (+) | NNGAATATKCANNNN       | TCTAATATTCTGATT           |
| M0016 | 2 | V\$OCT1_06 | 0.839844 | 9490 | (+) | CWNAWTKWSATRYN        | AATATTCTGATTTC            |
| M0024 | 8 | V\$OCT1_07 | 0.819165 | 9490 | (+) | TNTATGNTAATT          | AATATTCTGATT              |
| M0013 | 8 | V\$OCT1_04 | 0.794437 | 9492 | (-) | NNNNNNNNWATGCAAATNNNW | TATTCTGATTTC AATT-GGCCAAA |
| M0016 | 2 | V\$OCT1_06 | 0.825391 | 9511 | (+) | CWNAWTKWSATRYN        | CAAAGTTAAATCCT            |
| M0016 | 2 | V\$OCT1_06 | 0.821484 | 9543 | (-) | CWNAWTKWSATRYN        | CATCTTCAATTTTC            |
| M0013 | 6 | V\$OCT1_02 | 0.772875 | 9544 | (-) | NNGAATATKCANNNN       | ATCTTCAATTTTCTT           |
| M0016 | 2 | V\$OCT1_06 | 0.808594 | 9568 | (+) | CWNAWTKWSATRYN        | GACACTGAAACACC            |
| M0013 | 5 | V\$OCT1_01 | 0.754292 | 9578 | (+) | NNNNWTATGCAAATNTNNN   | CACCATAAGTAAAATTGCC       |
| M0016 | 2 | V\$OCT1_06 | 0.855078 | 9581 | (-) | CWNAWTKWSATRYN        | CATAAGTAAAATTG            |
| M0013 | 6 | V\$OCT1_02 | 0.87033  | 9593 | (-) | NNGAATATKCANNNN       | TGCCTGAATATCATT           |
| M0016 | 2 | V\$OCT1_06 | 0.868359 | 9597 | (-) | CWNAWTKWSATRYN        | TGAATATCATT AAT           |
| M0013 | 7 | V\$OCT1_03 | 0.876729 | 9600 | (-) | NNNR TAATNANNN        | ATATCATT AATAT            |
| M0016 | 2 | V\$OCT1_06 | 0.826953 | 9618 | (+) | CWNAWTKWSATRYN        | TTCACTGTAATTTA            |
| M0013 | 8 | V\$OCT1_04 | 0.786282 | 9625 | (-) | NNNNNNNNWATGCAAATNNNW | TAATTTATTTTAAGTTAACAGTA   |
| M0024 | 8 | V\$OCT1_07 | 0.831673 | 9628 | (+) | TNTATGNTAATT          | TTTATTTTAAGT              |
| M0013 | 8 | V\$OCT1_04 | 0.794019 | 9656 | (+) | NNNNNNNNWATGCAAATNNNW | AAGTGT TTTT TTAATTTT TAA  |
| M0013 | 8 | V\$OCT1_04 | 0.825387 | 9657 | (-) | NNNNNNNNWATGCAAATNNNW | AG-TGTTTTTTT AATTTT TAAAA |
| M0016 | 2 | V\$OCT1_06 | 0.826562 | 9661 | (+) | CWNAWTKWSATRYN        | TTTTTTT AATTTT            |
| M0024 | 8 | V\$OCT1_07 | 0.831673 | 9661 | (+) | TNTATGNTAATT          | TTTTTTT AATT              |
| M0013 | 8 | V\$OCT1_04 | 0.800084 | 9662 | (+) | NNNNNNNNWATGCAAATNNNW | TTTTTTT AATTTT TAAAAA-TAA |
| M0013 | 8 | V\$OCT1_04 | 0.784818 | 9663 | (-) | NNNNNNNNWATGCAAATNNNW | TTTTTTAATTTT TAAAAA-TAAT  |

|       |            |          |      |     |                      |                       |
|-------|------------|----------|------|-----|----------------------|-----------------------|
| M0013 |            |          |      |     | NNNNNNNWATGCAAATNNNW | TTTTAATTTTAAAAAA-     |
| 8     | V\$OCT1_04 | 0.80573  | 9664 | (-) | NNW                  | TAATT                 |
| M0013 |            |          |      |     | NNNNNNNWATGCAAATNNNW | TTTTAATTTTAAAAAA-     |
| 8     | V\$OCT1_04 | 0.797156 | 9665 | (+) | NNW                  | TAATTA                |
| M0013 |            |          |      |     | NNNNNNNWATGCAAATNNNW | TTTTAATTTTAAAAAA-     |
| 8     | V\$OCT1_04 | 0.805939 | 9665 | (-) | NNW                  | TAATTA                |
| M0016 |            |          |      |     |                      |                       |
| 2     | V\$OCT1_06 | 0.813281 | 9669 | (-) | CWNAWKWSATRYN        | AATTTTAAAAAAT         |
| M0013 |            |          |      |     |                      |                       |
| 7     | V\$OCT1_03 | 0.899249 | 9678 | (+) | NNNRTAATNANNN        | AAAATAATTAGAT         |
| M0013 |            |          |      |     |                      |                       |
| 7     | V\$OCT1_03 | 0.845516 | 9679 | (-) | NNNRTAATNANNN        | AAATAATTAGATT         |
| M0016 |            |          |      |     |                      |                       |
| 2     | V\$OCT1_06 | 0.855469 | 9680 | (+) | CWNAWKWSATRYN        | AATAATTAGATTAG        |
| M0024 |            |          |      |     |                      |                       |
| 8     | V\$OCT1_07 | 0.824041 | 9683 | (-) | TNTATGNTAATT         | AATTAGATTAGT          |
| M0024 |            |          |      |     |                      |                       |
| 8     | V\$OCT1_07 | 0.795209 | 9713 | (-) | TNTATGNTAATT         | AAATAACATCAA          |
| M0016 |            |          |      |     |                      |                       |
| 2     | V\$OCT1_06 | 0.942969 | 9717 | (-) | CWNAWKWSATRYN        | AACATCAAAGTGAG        |
| M0016 |            |          |      |     |                      |                       |
| 2     | V\$OCT1_06 | 0.817578 | 9722 | (+) | CWNAWKWSATRYN        | CAAAGTGAGATTAA        |
| M0013 |            |          |      |     |                      |                       |
| 7     | V\$OCT1_03 | 0.860529 | 9782 | (-) | NNNRTAATNANNN        | GCTTTATTACTTG         |
| M0013 |            |          |      |     |                      |                       |
| 6     | V\$OCT1_02 | 0.790471 | 9789 | (-) | NNGAATATKCANNNN      | TACTTGAAAAATGCTG      |
| M0016 |            |          |      |     |                      |                       |
| 2     | V\$OCT1_06 | 0.834375 | 9789 | (-) | CWNAWKWSATRYN        | TACTTGAAAAATGCT       |
| M0013 |            |          |      |     |                      |                       |
| 6     | V\$OCT1_02 | 0.789117 | 9792 | (+) | NNGAATATKCANNNN      | TTGAAAAATGCTGGGA      |
| M0016 |            |          |      |     |                      |                       |
| 2     | V\$OCT1_06 | 0.800781 | 9803 | (+) | CWNAWKWSATRYN        | GGGATTGGACTGCA        |
| M0016 |            |          |      |     |                      |                       |
| 2     | V\$OCT1_06 | 0.834375 | 9818 | (-) | CWNAWKWSATRYN        | GGTATCTAAGCAAC        |
| M0016 |            |          |      |     |                      |                       |
| 2     | V\$OCT1_06 | 0.800391 | 9837 | (+) | CWNAWKWSATRYN        | ATATTTTCTTTTC         |
| M0016 |            |          |      |     |                      |                       |
| 2     | V\$OCT1_06 | 0.834375 | 9861 | (-) | CWNAWKWSATRYN        | AGCTTCACAGACTG        |
| M0019 |            |          |      |     |                      |                       |
| 5     | V\$OCT1_Q6 | 0.820961 | 9876 | (+) | NNNNATGCAAATNAN      | ACAAATACAAACTAC       |
| M0016 |            |          |      |     |                      |                       |
| 2     | V\$OCT1_06 | 0.826562 | 9893 | (+) | CWNAWKWSATRYN        | CAGCTGGTAATATT        |
| M0013 |            |          |      |     |                      |                       |
| 7     | V\$OCT1_03 | 0.873568 | 9896 | (+) | NNNRTAATNANNN        | CTGGTAATATTTT         |
| M0013 |            |          |      |     | NNNNNNNWATGCAAATNNNW | TGGTAATATTTTCATTATAA- |
| 8     | V\$OCT1_04 | 0.912798 | 9897 | (-) | NNW                  | TAA                   |
| M0013 |            |          |      |     |                      |                       |
| 5     | V\$OCT1_01 | 0.785578 | 9899 | (-) | NNNNWTATGCAAATNTNNN  | GTAATATTTTCATTATAAT   |
| M0016 |            |          |      |     |                      |                       |
| 2     | V\$OCT1_06 | 0.860547 | 9901 | (+) | CWNAWKWSATRYN        | AATATTTTCATTAT        |
| M0024 |            |          |      |     |                      |                       |
| 8     | V\$OCT1_07 | 0.812381 | 9901 | (+) | TNTATGNTAATT         | AATATTTTCATT          |
| M0013 |            |          |      |     | NNNNNNNWATGCAAATNNNW | ATATTTTCATTATAA-      |
| 8     | V\$OCT1_04 | 0.828733 | 9902 | (+) | NNW                  | TAATACAA              |
| M0013 |            |          |      |     | NNNNNNNWATGCAAATNNNW | TATTTTCATTATAA-       |
| 8     | V\$OCT1_04 | 0.82936  | 9903 | (-) | NNW                  | TAATACAAA             |
| M0013 |            |          |      |     |                      |                       |
| 7     | V\$OCT1_03 | 0.911102 | 9905 | (-) | NNNRTAATNANNN        | TTTTCATTATAAT         |
| M0013 |            |          |      |     | NNNNNNNWATGCAAATNNNW | TTTTCATTATAA-         |
| 8     | V\$OCT1_04 | 0.790255 | 9905 | (+) | NNW                  | TAATACAAAAT           |
| M0013 |            |          |      |     | NNNNNNNWATGCAAATNNNW | TTTCATTATAA-          |
| 8     | V\$OCT1_04 | 0.783145 | 9906 | (-) | NNW                  | TAATACAAAATT          |
| M0013 |            |          |      |     |                      |                       |
| 5     | V\$OCT1_01 | 0.744945 | 9907 | (+) | NNNNWTATGCAAATNTNNN  | TTCATTATAATAATACAAA   |
| M0013 |            |          |      |     |                      |                       |
| 7     | V\$OCT1_03 | 0.874358 | 9910 | (+) | NNNRTAATNANNN        | ATTATAATAATAC         |

|       |            |          |       |     |                      |                       |
|-------|------------|----------|-------|-----|----------------------|-----------------------|
| M0013 |            |          |       |     | NNNNNNNWATGCAAATNNNW | TTATAATAATACAAAATT-   |
| 8     | V\$OCT1_04 | 0.854245 | 9911  | (+) | NNW                  | GTATT                 |
| M0013 |            |          |       |     | NNNNWTATGCAAATNTNNN  | ATAATAATACAAAATTGTA   |
| 5     | V\$OCT1_01 | 0.768791 | 9913  | (+) |                      |                       |
| M0016 |            |          |       |     | CWNAWKWSATRYN        | AATAATACAAAATT        |
| 2     | V\$OCT1_06 | 0.813281 | 9915  | (-) |                      |                       |
| M0016 |            |          |       |     | CWNAWKWSATRYN        | CAAAATTGTATTCT        |
| 2     | V\$OCT1_06 | 0.881641 | 9922  | (+) | NNNNNNNWATGCAAATNNNW | AATTGTATTCTG-         |
| M0013 |            |          |       |     | NNW                  | CAGAATTAAAG           |
| 8     | V\$OCT1_04 | 0.792765 | 9925  | (-) | NNNNNNNWATGCAAATNNNW | ATTGTATTCTG-          |
| M0013 |            |          |       |     | NNW                  | CAGAATTAAAGT          |
| 8     | V\$OCT1_04 | 0.829987 | 9926  | (+) |                      |                       |
| M0016 |            |          |       |     | CWNAWKWSATRYN        | AGAATTAAAGTAGT        |
| 2     | V\$OCT1_06 | 0.826953 | 9938  | (-) |                      |                       |
| M0024 |            |          |       |     | TNTATGNTAATT         | AATTAAAGTAGT          |
| 8     | V\$OCT1_07 | 0.817257 | 9940  | (-) | NNNNNNNWATGCAAATNNNW | ATTAAAGTAG-           |
| M0013 |            |          |       |     | NNW                  | TTAAATTTTAAAT         |
| 8     | V\$OCT1_04 | 0.818068 | 9941  | (+) |                      |                       |
| M0016 |            |          |       |     | CWNAWKWSATRYN        | AGTAGTTAAATTTT        |
| 2     | V\$OCT1_06 | 0.834766 | 9946  | (+) |                      |                       |
| M0016 |            |          |       |     | CWNAWKWSATRYN        | AGTAGTTAAATTTT        |
| 2     | V\$OCT1_06 | 0.847266 | 9946  | (-) |                      |                       |
| M0024 |            |          |       |     | TNTATGNTAATT         | AGTAGTTAAATT          |
| 8     | V\$OCT1_07 | 0.793301 | 9946  | (+) |                      |                       |
| M0016 |            |          |       |     | CWNAWKWSATRYN        | AAATTTTAAATGGG        |
| 2     | V\$OCT1_06 | 0.829297 | 9953  | (+) | NNNNNNNWATGCAAATNNNW | GGTTTGCTTTTAAA-       |
| M0013 |            |          |       |     | NNW                  | TATGTTTTT             |
| 8     | V\$OCT1_04 | 0.804266 | 9966  | (-) |                      |                       |
| M0016 |            |          |       |     | CWNAWKWSATRYN        | TGCTTTTAAATATG        |
| 2     | V\$OCT1_06 | 0.808594 | 9970  | (+) |                      |                       |
| M0016 |            |          |       |     | CWNAWKWSATRYN        | TGCTTTTAAATATG        |
| 2     | V\$OCT1_06 | 0.88125  | 9970  | (-) | NNNNNNNWATGCAAATNNNW | CCTTGATCATGAATAA-     |
| M0013 |            |          |       |     | NNW                  | TAATTGG               |
| 8     | V\$OCT1_04 | 0.828524 | 10010 | (+) |                      |                       |
| M0013 |            |          |       |     | NNGAATATKCANNNN      | ATCATGAATAATAAT       |
| 6     | V\$OCT1_02 | 0.886844 | 10015 | (-) |                      |                       |
| M0013 |            |          |       |     | NNNRTAATNANNN        | TGAATAATAATTG         |
| 7     | V\$OCT1_03 | 0.871987 | 10019 | (+) |                      |                       |
| M0013 |            |          |       |     | NNGAATATKCANNNN      | ATGCTCCATATGCTT       |
| 6     | V\$OCT1_02 | 0.774499 | 10036 | (-) |                      |                       |
| M0013 |            |          |       |     | NNNNWTATGCAAATNTNNN  | CTCCATATGCTTCTCTATG   |
| 5     | V\$OCT1_01 | 0.743037 | 10039 | (+) |                      |                       |
| M0013 |            |          |       |     | NNGAATATKCANNNN      | CTCCATATGCTTCTC       |
| 6     | V\$OCT1_02 | 0.791012 | 10039 | (+) |                      |                       |
| M0013 |            |          |       |     | NNGAATATKCANNNN      | TTCTCTATGCACCTA       |
| 6     | V\$OCT1_02 | 0.772604 | 10049 | (+) |                      |                       |
| M0013 |            |          |       |     | NNNRTAATNANNN        | TTCTATTTATGCT         |
| 7     | V\$OCT1_03 | 0.877519 | 10081 | (-) |                      |                       |
| M0013 |            |          |       |     | NNNNWTATGCAAATNTNNN  | CTATTTATGCTGAGACTAA   |
| 5     | V\$OCT1_01 | 0.746089 | 10083 | (+) | NNNNNNNWATGCAAATNNNW | CTGTATCACATCCA-       |
| M0013 |            |          |       |     | NNW                  | TAATTACTA             |
| 8     | V\$OCT1_04 | 0.785027 | 10106 | (-) |                      |                       |
| M0016 |            |          |       |     | CWNAWKWSATRYN        | TGTATCACATCCAT        |
| 2     | V\$OCT1_06 | 0.847266 | 10107 | (-) |                      |                       |
| M0013 |            |          |       |     | NNNRTAATNANNN        | TCCATAATTACTA         |
| 7     | V\$OCT1_03 | 0.896484 | 10116 | (+) |                      |                       |
| M0013 |            |          |       |     | NNNRTAATNANNN        | CCATAATTACTAT         |
| 7     | V\$OCT1_03 | 0.894508 | 10117 | (-) |                      |                       |
| M0024 |            |          |       |     | TNTATGNTAATT         | AATTACTATCCA          |
| 8     | V\$OCT1_07 | 0.803901 | 10121 | (-) | NNNNNNNWATGCAAATNNNW | AAGTTTACTTTAACTAAATTC |
| M0013 |            |          |       |     | NNW                  | TA                    |
| 8     | V\$OCT1_04 | 0.786491 | 10138 | (-) |                      |                       |
| M0016 |            |          |       |     | CWNAWKWSATRYN        | TACATCAAATCCTC        |
| 2     | V\$OCT1_06 | 0.862891 | 10159 | (-) | NNNNNNNWATGCAAATNNNW | ATATATTATTCAG-        |
| M0013 |            |          |       |     | NNW                  | GAATTTAT              |
| 8     | V\$OCT1_04 | 0.792765 | 10190 | (-) |                      |                       |



|       |            |          |       |     |                       |                       |
|-------|------------|----------|-------|-----|-----------------------|-----------------------|
| M0016 |            |          |       |     |                       |                       |
| 2     | V\$OCT1_06 | 0.842187 | 10190 | (+) | CWNAWTKWSATRYN        | ATATATTATATTCA        |
| M0016 |            |          |       |     |                       |                       |
| 2     | V\$OCT1_06 | 0.866016 | 10191 | (-) | CWNAWTKWSATRYN        | TATATTATATTTCAG       |
| M0013 |            |          |       |     |                       |                       |
| 6     | V\$OCT1_02 | 0.819166 | 10193 | (+) | NNGAATATKCANNNN       | TATTATATTTCAGGAA      |
| M0013 |            |          |       |     | NNNNNNNNWATGCAAATNNNW | TGCTTTTATTTCCCAAATTCA |
| 8     | V\$OCT1_04 | 0.786491 | 10220 | (-) | NNW                   | C                     |
| M0013 |            |          |       |     |                       |                       |
| 6     | V\$OCT1_02 | 0.794532 | 10260 | (+) | NNGAATATKCANNNN       | ATAAAAAATGCTTGCT      |
| M0013 |            |          |       |     | NNNNNNNNWATGCAAATNNNW | GCACAGATATGCCAAA-     |
| 8     | V\$OCT1_04 | 0.852363 | 10282 | (+) | NNW                   | TAAACTT               |
| M0013 |            |          |       |     |                       |                       |
| 5     | V\$OCT1_01 | 0.768791 | 10284 | (+) | NNNNWTATGCAAATNTNNN   | ACAGATATGCCAAATAAAC   |
| M0013 |            |          |       |     |                       |                       |
| 6     | V\$OCT1_02 | 0.787223 | 10284 | (+) | NNGAATATKCANNNN       | ACAGATATGCCAAAT       |
| M0019 |            |          |       |     |                       |                       |
| 5     | V\$OCT1_Q6 | 0.800491 | 10286 | (+) | NNNNATGCAAATNAN       | AGATATGCCAAATAA       |
| M0016 |            |          |       |     |                       |                       |
| 2     | V\$OCT1_06 | 0.834375 | 10287 | (-) | CWNAWTKWSATRYN        | GATATGCCAAATAA        |
| M0016 |            |          |       |     |                       |                       |
| 2     | V\$OCT1_06 | 0.842187 | 10299 | (+) | CWNAWTKWSATRYN        | AAACTTTCCATTTA        |
| M0024 |            |          |       |     |                       |                       |
| 8     | V\$OCT1_07 | 0.815137 | 10301 | (-) | TNTATGNTAATT          | ACTTTCCATTTA          |
| M0016 |            |          |       |     |                       |                       |
| 2     | V\$OCT1_06 | 0.808203 | 10346 | (+) | CWNAWTKWSATRYN        | GTCCTAGACATTCA        |
| M0013 |            |          |       |     | NNNNNNNNWATGCAAATNNNW | TCCTAGACATTCAAATT-    |
| 8     | V\$OCT1_04 | 0.784191 | 10347 | (+) | NNW                   | GCTTTT                |
| M0013 |            |          |       |     |                       |                       |
| 5     | V\$OCT1_01 | 0.775849 | 10349 | (+) | NNNNWTATGCAAATNTNNN   | CTAGACATTCAAATTGCTT   |
| M0019 |            |          |       |     |                       |                       |
| 5     | V\$OCT1_Q6 | 0.842522 | 10351 | (+) | NNNNATGCAAATNAN       | AGACATTCAAATTGC       |
| M0016 |            |          |       |     |                       |                       |
| 2     | V\$OCT1_06 | 0.834766 | 10352 | (-) | CWNAWTKWSATRYN        | GACATTCAAATTGC        |
| M0024 |            |          |       |     |                       |                       |
| 8     | V\$OCT1_07 | 0.825313 | 10352 | (+) | TNTATGNTAATT          | GACATTCAAATT          |
| M0013 |            |          |       |     |                       |                       |
| 6     | V\$OCT1_02 | 0.785057 | 10370 | (+) | NNGAATATKCANNNN       | GTCAAAATTCTCTAA       |
| M0016 |            |          |       |     |                       |                       |
| 2     | V\$OCT1_06 | 0.800781 | 10388 | (-) | CWNAWTKWSATRYN        | AGAATCAGAGAGTT        |
| M0013 |            |          |       |     |                       |                       |
| 6     | V\$OCT1_02 | 0.773958 | 10397 | (-) | NNGAATATKCANNNN       | GAGTTGATTAATCTT       |
| M0016 |            |          |       |     |                       |                       |
| 2     | V\$OCT1_06 | 0.829297 | 10432 | (+) | CWNAWTKWSATRYN        | ATGTATGAAATGGA        |
| M0013 |            |          |       |     | NNNNNNNNWATGCAAATNNNW | TGTATGAAATGGAAA-      |
| 8     | V\$OCT1_04 | 0.79862  | 10433 | (+) | NNW                   | TATAGTTA              |
| M0016 |            |          |       |     |                       |                       |
| 2     | V\$OCT1_06 | 0.855078 | 10433 | (-) | CWNAWTKWSATRYN        | TGTATGAAATGGAA        |
| M0013 |            |          |       |     |                       |                       |
| 5     | V\$OCT1_01 | 0.776803 | 10435 | (+) | NNNNWTATGCAAATNTNNN   | TATGAAATGGAAATATAGT   |
| M0016 |            |          |       |     |                       |                       |
| 2     | V\$OCT1_06 | 0.847266 | 10438 | (+) | CWNAWTKWSATRYN        | GAAATGGAAATATA        |
| M0019 |            |          |       |     |                       |                       |
| 5     | V\$OCT1_Q6 | 0.80595  | 10452 | (-) | NNNNATGCAAATNAN       | GTTATTCTCACATCC       |
| M0013 |            |          |       |     |                       |                       |
| 5     | V\$OCT1_01 | 0.782335 | 10470 | (-) | NNNNWTATGCAAATNTNNN   | TGTTATTTTGAATACTGAA   |
| M0016 |            |          |       |     |                       |                       |
| 2     | V\$OCT1_06 | 0.826562 | 10472 | (+) | CWNAWTKWSATRYN        | TTATTTTGAATACT        |
| M0013 |            |          |       |     |                       |                       |
| 6     | V\$OCT1_02 | 0.831348 | 10474 | (-) | NNGAATATKCANNNN       | ATTTTGAATACTGAA       |
| M0024 |            |          |       |     |                       |                       |
| 8     | V\$OCT1_07 | 0.800085 | 10474 | (-) | TNTATGNTAATT          | ATTTTGAATACT          |
| M0016 |            |          |       |     |                       |                       |
| 2     | V\$OCT1_06 | 0.834375 | 10541 | (+) | CWNAWTKWSATRYN        | AAAATGTTTCATTCC       |
| M0024 |            |          |       |     |                       |                       |
| 8     | V\$OCT1_07 | 0.817045 | 10541 | (+) | TNTATGNTAATT          | AAAATGTTTCATT         |

|       |   |            |          |       |     |                             |                              |
|-------|---|------------|----------|-------|-----|-----------------------------|------------------------------|
| M0013 | 5 | V\$OCT1_01 | 0.739794 | 10577 | (+) | NNNNWTATGCAAATNTNNN         | CAGTCTCTGTAAATTTTGC          |
| M0024 | 8 | V\$OCT1_07 | 0.871317 | 10580 | (+) | TNTATGNTAATT                | TCTCTGTAAATT                 |
| M0013 | 7 | V\$OCT1_03 | 0.922165 | 10615 | (-) | NNNRTAATNANNN               | ACAACATTATGAA                |
| M0016 | 2 | V\$OCT1_06 | 0.816406 | 10639 | (+) | CWNAWKWSATRYN               | AAGAAGTGCATTG                |
| M0013 | 6 | V\$OCT1_02 | 0.792907 | 10641 | (-) | NNGAATATKCANNNN             | GAAGTGCATTGAAC               |
| M0016 | 2 | V\$OCT1_06 | 0.809375 | 10703 | (-) | CWNAWKWSATRYN               | AATGTATCAATTAG               |
| M0013 | 8 | V\$OCT1_04 | 0.840443 | 10705 | (-) | NNNNNNNWATGCAAATNNNW<br>NNW | TGTATCAATTAG-<br>CACAACCCTC  |
| M0013 | 5 | V\$OCT1_01 | 0.797406 | 10707 | (-) | NNNNWTATGCAAATNTNNN         | TATCAATTAGCACAACCCT          |
| M0024 | 8 | V\$OCT1_07 | 0.864109 | 10711 | (-) | TNTATGNTAATT                | AATTAGCACAAC                 |
| M0024 | 8 | V\$OCT1_07 | 0.804113 | 10726 | (+) | TNTATGNTAATT                | TCTTGCTACTT                  |
| M0016 | 2 | V\$OCT1_06 | 0.823828 | 10752 | (-) | CWNAWKWSATRYN               | TGACTGTAATAGTC               |
| M0016 | 2 | V\$OCT1_06 | 0.813281 | 10787 | (+) | CWNAWKWSATRYN               | ATTTTTTCTTTTA                |
| M0013 | 8 | V\$OCT1_04 | 0.798411 | 10796 | (+) | NNNNNNNWATGCAAATNNNW<br>NNW | TTTACTTATAGCAATTAAC<br>TT    |
| M0013 | 7 | V\$OCT1_03 | 0.853418 | 10819 | (+) | NNNRTAATNANNN               | GACTTAATTAAGA                |
| M0013 | 7 | V\$OCT1_03 | 0.881075 | 10820 | (-) | NNNRTAATNANNN               | ACTTAATTAAGAC                |
| M0013 | 8 | V\$OCT1_04 | 0.793183 | 10850 | (-) | NNNNNNNWATGCAAATNNNW<br>NNW | GCCTTAGTTTAGCAAAATTA-<br>TAT |
| M0013 | 5 | V\$OCT1_01 | 0.789012 | 10852 | (-) | NNNNWTATGCAAATNTNNN         | CTTAGTTTAGCAAAATTAT          |
| M0016 | 2 | V\$OCT1_06 | 0.902344 | 10862 | (+) | CWNAWKWSATRYN               | CAAAATTATATTTT               |
| M0016 | 2 | V\$OCT1_06 | 0.847656 | 10863 | (-) | CWNAWKWSATRYN               | AAAATTATATTTTC               |
| M0013 | 8 | V\$OCT1_04 | 0.7844   | 10864 | (-) | NNNNNNNWATGCAAATNNNW<br>NNW | AAATTATATTTTCACATTTT-<br>GTT |
| M0013 | 5 | V\$OCT1_01 | 0.772415 | 10866 | (-) | NNNNWTATGCAAATNTNNN         | ATTATATTTTCACATTTTG          |
| M0016 | 2 | V\$OCT1_06 | 0.803906 | 10868 | (+) | CWNAWKWSATRYN               | TATATTTTCACATT               |
| M0016 | 2 | V\$OCT1_06 | 0.809375 | 10871 | (-) | CWNAWKWSATRYN               | ATTTTCACATTTTG               |
| M0016 | 2 | V\$OCT1_06 | 0.821484 | 10903 | (-) | CWNAWKWSATRYN               | AGAAGTCAATGATG               |
| M0013 | 6 | V\$OCT1_02 | 0.777477 | 10911 | (-) | NNGAATATKCANNNN             | ATGATGAATTTAATT              |
| M0016 | 2 | V\$OCT1_06 | 0.891016 | 10914 | (+) | CWNAWKWSATRYN               | ATGAATTTAATTTG               |
| M0016 | 2 | V\$OCT1_06 | 0.881641 | 10915 | (-) | CWNAWKWSATRYN               | TGAATTTAATTTGG               |
| M0024 | 8 | V\$OCT1_07 | 0.820013 | 10978 | (+) | TNTATGNTAATT                | TCCAAGGAAATT                 |
| M0013 | 8 | V\$OCT1_04 | 0.812422 | 10979 | (+) | NNNNNNNWATGCAAATNNNW<br>NNW | CCAAGGAAATTTAAATATAT<br>CTG  |
| M0013 | 8 | V\$OCT1_04 | 0.811794 | 10980 | (-) | NNNNNNNWATGCAAATNNNW<br>NNW | CAAGGAAATTTAAATATATCT<br>GT  |
| M0013 | 5 | V\$OCT1_01 | 0.819916 | 10982 | (-) | NNNNWTATGCAAATNTNNN         | AGGAAATTTAAATATATCT          |
| M0016 | 2 | V\$OCT1_06 | 0.9375   | 10984 | (+) | CWNAWKWSATRYN               | GAAATTTAAATATA               |
| M0016 | 2 | V\$OCT1_06 | 0.855469 | 10984 | (-) | CWNAWKWSATRYN               | GAAATTTAAATATA               |

|       |   |            |          |       |     |                             |                              |
|-------|---|------------|----------|-------|-----|-----------------------------|------------------------------|
| M0019 | 5 | V\$OCT1_Q6 | 0.792849 | 10984 | (-) | NNNNATGCAAATNAN             | GAAATTTAAATATAT              |
| M0016 | 2 | V\$OCT1_06 | 0.800391 | 10985 | (-) | CWNAWTKWSATRYN              | AAATTTAAATATAT               |
| M0024 | 8 | V\$OCT1_07 | 0.90566  | 10986 | (-) | TNTATGNTAATT                | AATTTAAATATA                 |
| M0013 | 8 | V\$OCT1_04 | 0.801966 | 11033 | (-) | NNNNNNNWATGCAAATNNNW<br>NNW | AGAAACTACTTGAA-<br>TAATCTATT |
| M0013 | 5 | V\$OCT1_01 | 0.75124  | 11035 | (-) | NNNNWTATGCAAATNTNNN         | AAACTACTGAATAATCTA           |
| M0013 | 6 | V\$OCT1_02 | 0.897672 | 11039 | (-) | NNGAATATKCANNNN             | TACTTGAATAATCTA              |
| M0016 | 2 | V\$OCT1_06 | 0.826953 | 11050 | (-) | CWNAWTKWSATRYN              | TCTATTTCACTACC               |
| M0016 | 2 | V\$OCT1_06 | 0.808203 | 11059 | (+) | CWNAWTKWSATRYN              | GTACCTTAGCTGTG               |
| M0016 | 2 | V\$OCT1_06 | 0.825391 | 11124 | (+) | CWNAWTKWSATRYN              | CAGAATGTCATCAT               |
| M0016 | 2 | V\$OCT1_06 | 0.814453 | 11125 | (-) | CWNAWTKWSATRYN              | AGAATGTCATCATA               |
| M0016 | 2 | V\$OCT1_06 | 0.803125 | 11135 | (-) | CWNAWTKWSATRYN              | CATATTTCTAGTT                |
| M0013 | 5 | V\$OCT1_01 | 0.750477 | 11155 | (-) | NNNNWTATGCAAATNTNNN         | CAGGATTTAGCTTAGTCCT          |
| M0016 | 2 | V\$OCT1_06 | 0.821484 | 11178 | (-) | CWNAWTKWSATRYN              | TGAATGAAAGCACC               |
| M0016 | 2 | V\$OCT1_06 | 0.834375 | 11195 | (-) | CWNAWTKWSATRYN              | TGAATGCTCTTAT                |
| M0016 | 2 | V\$OCT1_06 | 0.800781 | 11198 | (+) | CWNAWTKWSATRYN              | ATGTCTGTTATTCA               |
| M0016 | 2 | V\$OCT1_06 | 0.804297 | 11199 | (-) | CWNAWTKWSATRYN              | TGTCTGTTATTAG                |
| M0005 | 9 | V\$YY1_01  | 0.805046 | 55    | (-) | NNNNNCCATNTWNNNWN           | GTTTACATATGGCAAAA            |
| M0005 | 9 | V\$YY1_01  | 0.821756 | 163   | (-) | NNNNNCCATNTWNNNWN           | GCTTAAAAATGCATTG             |
| M0005 | 9 | V\$YY1_01  | 0.809633 | 175   | (-) | NNNNNCCATNTWNNNWN           | ATTTGCAAATGTTGATA            |
| M0005 | 9 | V\$YY1_01  | 0.796855 | 215   | (+) | NNNNNCCATNTWNNNWN           | AAAAATCATATAGTTT             |
| M0005 | 9 | V\$YY1_01  | 0.816514 | 401   | (+) | NNNNNCCATNTWNNNWN           | TAAGAGCATTTCTGGTA            |
| M0005 | 9 | V\$YY1_01  | 0.89384  | 516   | (-) | NNNNNCCATNTWNNNWN           | TTGTAAAGATGGTTATA            |
| M0006 | 9 | V\$YY1_02  | 0.764727 | 647   | (-) | NNNCGGCCATCTGNCTSNW         | TATATAAAATATGGCGGTAT         |
| M0005 | 9 | V\$YY1_01  | 0.895478 | 649   | (-) | NNNNNCCATNTWNNNWN           | TATAAAATATGGCGGTA            |
| M0006 | 9 | V\$YY1_02  | 0.75116  | 715   | (+) | NNNCGGCCATCTGNCTSNW         | TGGAAACCATTTTCTAGCA          |
| M0005 | 9 | V\$YY1_01  | 0.909895 | 716   | (+) | NNNNNCCATNTWNNNWN           | GGAAACCATTTTCTAG             |
| M0005 | 9 | V\$YY1_01  | 0.823722 | 785   | (-) | NNNNNCCATNTWNNNWN           | AGTCAAACATGATATGA            |
| M0005 | 9 | V\$YY1_01  | 0.779489 | 834   | (+) | NNNNNCCATNTWNNNWN           | CTTCCTCATATAGTCAT            |
| M0005 | 9 | V\$YY1_01  | 0.780472 | 846   | (-) | NNNNNCCATNTWNNNWN           | GTCATGTCATGGATATA            |
| M0005 | 9 | V\$YY1_01  | 0.775229 | 961   | (-) | NNNNNCCATNTWNNNWN           | GACTCTGAATGAGCAGG            |
| M0005 | 9 | V\$YY1_01  | 0.794233 | 1002  | (+) | NNNNNCCATNTWNNNWN           | GAAAGACATTTTTTTTA            |
| M0005 | 9 | V\$YY1_01  | 0.800459 | 1029  | (-) | NNNNNCCATNTWNNNWN           | TAAATTTAAATGGGTTCA           |
| M0005 | 9 | V\$YY1_01  | 0.79325  | 1060  | (+) | NNNNNCCATNTWNNNWN           | ACTATACATTTTAACAA            |

|       |           |          |      |     |                   |                   |
|-------|-----------|----------|------|-----|-------------------|-------------------|
| M0005 |           |          |      |     |                   |                   |
| 9     | V\$YY1_01 | 0.858126 | 1138 | (-) | NNNNNCCATNTWNNNWN | ATTTAAATATGAATGCC |
| M0005 |           |          |      |     |                   |                   |
| 9     | V\$YY1_01 | 0.815203 | 1170 | (+) | NNNNNCCATNTWNNNWN | CAAAACCCTATTACCAC |
| M0005 |           |          |      |     |                   |                   |
| 9     | V\$YY1_01 | 0.796855 | 1183 | (+) | NNNNNCCATNTWNNNWN | CCACTTCATGGATCAAA |
| M0005 |           |          |      |     |                   |                   |
| 9     | V\$YY1_01 | 0.809633 | 1290 | (+) | NNNNNCCATNTWNNNWN | GATTAACATTATATTG  |
| M0005 |           |          |      |     |                   |                   |
| 9     | V\$YY1_01 | 0.788008 | 1472 | (+) | NNNNNCCATNTWNNNWN | GACCACCATGAAGCTTC |
| M0005 |           |          |      |     |                   |                   |
| 9     | V\$YY1_01 | 0.788663 | 1658 | (-) | NNNNNCCATNTWNNNWN | TTAAAACTATGATAATC |
| M0005 |           |          |      |     |                   |                   |
| 9     | V\$YY1_01 | 0.81291  | 1829 | (-) | NNNNNCCATNTWNNNWN | ATCAAAGAATGACATGA |
| M0005 |           |          |      |     |                   |                   |
| 9     | V\$YY1_01 | 0.837811 | 2239 | (-) | NNNNNCCATNTWNNNWN | ATAAAATAATGGTCTTG |
| M0005 |           |          |      |     |                   |                   |
| 9     | V\$YY1_01 | 0.813893 | 2294 | (-) | NNNNNCCATNTWNNNWN | TTTCTGAAATGCTGAGA |
| M0005 |           |          |      |     |                   |                   |
| 9     | V\$YY1_01 | 0.922346 | 2334 | (+) | NNNNNCCATNTWNNNWN | TATATCCATATTTAGAA |
| M0005 |           |          |      |     |                   |                   |
| 9     | V\$YY1_01 | 0.771625 | 2344 | (-) | NNNNNCCATNTWNNNWN | TTTAGAAAATGCAGGAT |
| M0005 |           |          |      |     |                   |                   |
| 9     | V\$YY1_01 | 0.801769 | 2509 | (-) | NNNNNCCATNTWNNNWN | TTTTACAAATGAAATGG |
| M0005 |           |          |      |     |                   |                   |
| 9     | V\$YY1_01 | 0.792923 | 2514 | (-) | NNNNNCCATNTWNNNWN | CAAATGAAATGGGTATA |
| M0005 |           |          |      |     |                   |                   |
| 9     | V\$YY1_01 | 0.892202 | 2579 | (+) | NNNNNCCATNTWNNNWN | CCACATCATTTTTAATG |
| M0005 |           |          |      |     |                   |                   |
| 9     | V\$YY1_01 | 0.859764 | 2628 | (-) | NNNNNCCATNTWNNNWN | CAGTTAAAATGAAGATT |
| M0005 |           |          |      |     |                   |                   |
| 9     | V\$YY1_01 | 0.790301 | 2694 | (+) | NNNNNCCATNTWNNNWN | AAGCAACATTTAATTAG |
| M0005 |           |          |      |     |                   |                   |
| 9     | V\$YY1_01 | 0.807995 | 2728 | (-) | NNNNNCCATNTWNNNWN | CTCCAAAAATGTATAAT |
| M0005 |           |          |      |     |                   |                   |
| 9     | V\$YY1_01 | 0.815531 | 2764 | (+) | NNNNNCCATNTWNNNWN | AACTACCATGTAATATA |
| M0005 |           |          |      |     |                   |                   |
| 9     | V\$YY1_01 | 0.789646 | 2888 | (+) | NNNNNCCATNTWNNNWN | CTCCACCATACTCTAAA |
| M0005 |           |          |      |     |                   |                   |
| 9     | V\$YY1_01 | 0.791612 | 3264 | (+) | NNNNNCCATNTWNNNWN | TAAAGTCAGTTTCACAT |
| M0005 |           |          |      |     |                   |                   |
| 9     | V\$YY1_01 | 0.871232 | 3337 | (+) | NNNNNCCATNTWNNNWN | ACAAACCATCTTAGAAA |
| M0005 |           |          |      |     |                   |                   |
| 9     | V\$YY1_01 | 0.795544 | 3531 | (+) | NNNNNCCATNTWNNNWN | CCACACCCTTCTACAAC |
| M0005 |           |          |      |     |                   |                   |
| 9     | V\$YY1_01 | 0.799803 | 3545 | (+) | NNNNNCCATNTWNNNWN | AACAGCCATTAATCCAC |
| M0005 |           |          |      |     |                   |                   |
| 9     | V\$YY1_01 | 0.799803 | 3565 | (-) | NNNNNCCATNTWNNNWN | GTCTCTAATGGAATTA  |
| M0005 |           |          |      |     |                   |                   |
| 9     | V\$YY1_01 | 0.831258 | 3703 | (+) | NNNNNCCATNTWNNNWN | TCATTTCATTTATTTTC |
| M0005 |           |          |      |     |                   |                   |
| 9     | V\$YY1_01 | 0.791612 | 3727 | (+) | NNNNNCCATNTWNNNWN | TGTATCCAGGTACACAA |
| M0005 |           |          |      |     |                   |                   |
| 9     | V\$YY1_01 | 0.778178 | 3780 | (+) | NNNNNCCATNTWNNNWN | TAAATTCCTATTCAATC |
| M0005 |           |          |      |     |                   |                   |
| 9     | V\$YY1_01 | 0.77097  | 3791 | (+) | NNNNNCCATNTWNNNWN | TCAATCCCTCCTTTGAC |
| M0005 |           |          |      |     |                   |                   |
| 9     | V\$YY1_01 | 0.876802 | 3852 | (-) | NNNNNCCATNTWNNNWN | AACCAAATATGGTACCT |
| M0005 |           |          |      |     |                   |                   |
| 9     | V\$YY1_01 | 0.778506 | 3961 | (-) | NNNNNCCATNTWNNNWN | TTGTTCAAATGGAAAAC |
| M0005 |           |          |      |     |                   |                   |
| 9     | V\$YY1_01 | 0.820446 | 3989 | (+) | NNNNNCCATNTWNNNWN | GGGGTGCATTTTTCCTT |
| M0005 |           |          |      |     |                   |                   |
| 9     | V\$YY1_01 | 0.854194 | 4093 | (-) | NNNNNCCATNTWNNNWN | CTTCTAAAATGACAGCC |
| M0005 |           |          |      |     |                   |                   |
| 9     | V\$YY1_01 | 0.780144 | 4138 | (-) | NNNNNCCATNTWNNNWN | GTTTGCAAATGTTTTTT |

|       |           |          |      |     |                     |                      |
|-------|-----------|----------|------|-----|---------------------|----------------------|
| M0005 |           |          |      |     |                     |                      |
| 9     | V\$YY1_01 | 0.784731 | 4272 | (+) | NNNNNCCATNTWNNNWN   | AACACTCATGTTTTCAT    |
| M0005 |           |          |      |     |                     |                      |
| 9     | V\$YY1_01 | 0.825033 | 4314 | (+) | NNNNNCCATNTWNNNWN   | AATTTCATGTTCATTA     |
| M0005 |           |          |      |     |                     |                      |
| 9     | V\$YY1_01 | 0.780144 | 4472 | (-) | NNNNNCCATNTWNNNWN   | TTGTCTGAATGATTTTT    |
| M0005 |           |          |      |     |                     |                      |
| 9     | V\$YY1_01 | 0.855177 | 4570 | (-) | NNNNNCCATNTWNNNWN   | GTTAACAAATGGAAGCA    |
| M0005 |           |          |      |     |                     |                      |
| 9     | V\$YY1_01 | 0.775229 | 4595 | (+) | NNNNNCCATNTWNNNWN   | TCTCTCCAGTAAGTATT    |
| M0005 |           |          |      |     |                     |                      |
| 9     | V\$YY1_01 | 0.783093 | 4636 | (-) | NNNNNCCATNTWNNNWN   | GCCTTTTTATGGAATA     |
| M0005 |           |          |      |     |                     |                      |
| 9     | V\$YY1_01 | 0.77097  | 4770 | (+) | NNNNNCCATNTWNNNWN   | AGTGCACATTTACATAC    |
| M0005 |           |          |      |     |                     |                      |
| 9     | V\$YY1_01 | 0.840433 | 4871 | (+) | NNNNNCCATNTWNNNWN   | CACATTCATCTTTTAAT    |
| M0005 |           |          |      |     |                     |                      |
| 9     | V\$YY1_01 | 0.794561 | 4921 | (+) | NNNNNCCATNTWNNNWN   | GATATCCATTCATTTGT    |
| M0005 |           |          |      |     |                     |                      |
| 9     | V\$YY1_01 | 0.792267 | 4935 | (+) | NNNNNCCATNTWNNNWN   | TGTGTCCCTCTTTACTA    |
| M0005 |           |          |      |     |                     |                      |
| 9     | V\$YY1_01 | 0.800786 | 4980 | (+) | NNNNNCCATNTWNNNWN   | GGAGAACATCGATGAAC    |
| M0005 |           |          |      |     |                     |                      |
| 9     | V\$YY1_01 | 0.774246 | 4983 | (-) | NNNNNCCATNTWNNNWN   | GAACATCGATGAACTGA    |
| M0006 |           |          |      |     |                     |                      |
| 9     | V\$YY1_02 | 0.778472 | 5003 | (+) | NNNCGGCCATCTGNCTSNW | TAAGGACCATCAATGATATT |
| M0005 |           |          |      |     |                     |                      |
| 9     | V\$YY1_01 | 0.786697 | 5004 | (+) | NNNNNCCATNTWNNNWN   | AAGGACCATCAATGATA    |
| M0005 |           |          |      |     |                     |                      |
| 9     | V\$YY1_01 | 0.81422  | 5007 | (-) | NNNNNCCATNTWNNNWN   | GACCATCAATGATATTT    |
| M0005 |           |          |      |     |                     |                      |
| 9     | V\$YY1_01 | 0.844037 | 5109 | (-) | NNNNNCCATNTWNNNWN   | AACACAAAATGATGAAC    |
| M0005 |           |          |      |     |                     |                      |
| 9     | V\$YY1_01 | 0.818152 | 5218 | (+) | NNNNNCCATNTWNNNWN   | TTACTTCATTTATACTT    |
| M0006 |           |          |      |     |                     |                      |
| 9     | V\$YY1_02 | 0.835059 | 5241 | (-) | NNNCGGCCATCTGNCTSNW | AACITTCAAAATGGCTGATG |
| M0005 |           |          |      |     |                     |                      |
| 9     | V\$YY1_01 | 0.833879 | 5243 | (-) | NNNNNCCATNTWNNNWN   | CTTTCAAAATGGCTGAT    |
| M0005 |           |          |      |     |                     |                      |
| 9     | V\$YY1_01 | 0.835518 | 5337 | (-) | NNNNNCCATNTWNNNWN   | ATGAATAAATGGATGAA    |
| M0005 |           |          |      |     |                     |                      |
| 9     | V\$YY1_01 | 0.837156 | 5357 | (-) | NNNNNCCATNTWNNNWN   | ATGAATAAATGCAATTA    |
| M0005 |           |          |      |     |                     |                      |
| 9     | V\$YY1_01 | 0.886632 | 5488 | (-) | NNNNNCCATNTWNNNWN   | CTTGAAAAATGATTTTT    |
| M0005 |           |          |      |     |                     |                      |
| 9     | V\$YY1_01 | 0.770315 | 5502 | (-) | NNNNNCCATNTWNNNWN   | TTTTGGATCTGGATTCT    |
| M0005 |           |          |      |     |                     |                      |
| 9     | V\$YY1_01 | 0.802097 | 5607 | (-) | NNNNNCCATNTWNNNWN   | ATACCTGAATGATTATC    |
| M0005 |           |          |      |     |                     |                      |
| 9     | V\$YY1_01 | 0.772608 | 5671 | (+) | NNNNNCCATNTWNNNWN   | TAAGATTATTTTTAAAC    |
| M0005 |           |          |      |     |                     |                      |
| 9     | V\$YY1_01 | 0.787353 | 5738 | (-) | NNNNNCCATNTWNNNWN   | TGCCCAAAATGAATAAA    |
| M0005 |           |          |      |     |                     |                      |
| 9     | V\$YY1_01 | 0.801114 | 5903 | (-) | NNNNNCCATNTWNNNWN   | CATGAAAACGAAACGCA    |
| M0005 |           |          |      |     |                     |                      |
| 9     | V\$YY1_01 | 0.794561 | 5920 | (+) | NNNNNCCATNTWNNNWN   | ACACACCAGTTGAAAAA    |
| M0005 |           |          |      |     |                     |                      |
| 9     | V\$YY1_01 | 0.858453 | 5936 | (+) | NNNNNCCATNTWNNNWN   | AAAATCCATTTTGCTTA    |
| M0005 |           |          |      |     |                     |                      |
| 9     | V\$YY1_01 | 0.846003 | 6096 | (+) | NNNNNCCATNTWNNNWN   | TCACAACATATAAGAAT    |
| M0005 |           |          |      |     |                     |                      |
| 9     | V\$YY1_01 | 0.770642 | 6132 | (-) | NNNNNCCATNTWNNNWN   | ACTCTGAAATGCAGATT    |
| M0005 |           |          |      |     |                     |                      |
| 9     | V\$YY1_01 | 0.785059 | 6476 | (-) | NNNNNCCATNTWNNNWN   | AATGTACAATGCTGTGC    |
| M0005 |           |          |      |     |                     |                      |
| 9     | V\$YY1_01 | 0.77654  | 6525 | (-) | NNNNNCCATNTWNNNWN   | TCATTTAAATGATAATC    |

|       |           |          |      |     |                      |                      |
|-------|-----------|----------|------|-----|----------------------|----------------------|
| M0005 |           |          |      |     |                      |                      |
| 9     | V\$YY1_01 | 0.778506 | 6624 | (-) | NNNNNCCATNTWNNNWN    | GAGGATTTATGAAGGTA    |
| M0005 |           |          |      |     |                      |                      |
| 9     | V\$YY1_01 | 0.795872 | 6703 | (-) | NNNNNCCATNTWNNNWN    | TTGGCAAGCTGGTTACT    |
| M0005 |           |          |      |     |                      |                      |
| 9     | V\$YY1_01 | 0.837811 | 6730 | (-) | NNNNNCCATNTWNNNWN    | AAACATAAATGGGCGGA    |
| M0005 |           |          |      |     |                      |                      |
| 9     | V\$YY1_01 | 0.77654  | 6913 | (-) | NNNNNCCATNTWNNNWN    | GTGAACAAAGGGTTACA    |
| M0005 |           |          |      |     |                      |                      |
| 9     | V\$YY1_01 | 0.773591 | 7063 | (-) | NNNNNCCATNTWNNNWN    | TTCACAAGATGTATGGT    |
| M0005 |           |          |      |     |                      |                      |
| 9     | V\$YY1_01 | 0.807995 | 7067 | (-) | NNNNNCCATNTWNNNWN    | CAAGATGTATGGTTTCC    |
| M0006 |           |          |      |     |                      |                      |
| 9     | V\$YY1_02 | 0.812924 | 7080 | (+) | NNNCGGCCATCTTGNCTSNW | TTCCTGCCATTTAGCTGGTT |
| M0005 |           |          |      |     |                      |                      |
| 9     | V\$YY1_01 | 0.803408 | 7081 | (+) | NNNNNCCATNTWNNNWN    | TCCTGCCATTTAGCTGG    |
| M0006 |           |          |      |     |                      |                      |
| 9     | V\$YY1_02 | 0.833809 | 7247 | (+) | NNNCGGCCATCTTGNCTSNW | CCTCTGCCATCCAGGGTATG |
| M0005 |           |          |      |     |                      |                      |
| 9     | V\$YY1_01 | 0.821756 | 7361 | (-) | NNNNNCCATNTWNNNWN    | CTAAAAAGATGGGGAAA    |
| M0005 |           |          |      |     |                      |                      |
| 9     | V\$YY1_01 | 0.83945  | 7453 | (-) | NNNNNCCATNTWNNNWN    | TTTAAATATGTCCTTG     |
| M0005 |           |          |      |     |                      |                      |
| 9     | V\$YY1_01 | 0.781782 | 7525 | (+) | NNNNNCCATNTWNNNWN    | AAACTCAATATTTCAAA    |
| M0005 |           |          |      |     |                      |                      |
| 9     | V\$YY1_01 | 0.805374 | 7581 | (-) | NNNNNCCATNTWNNNWN    | CACTTAACTGGTTGTT     |
| M0005 |           |          |      |     |                      |                      |
| 9     | V\$YY1_01 | 0.782765 | 7652 | (-) | NNNNNCCATNTWNNNWN    | GAGAATGAATGCTCAGC    |
| M0005 |           |          |      |     |                      |                      |
| 9     | V\$YY1_01 | 0.792595 | 7710 | (+) | NNNNNCCATNTWNNNWN    | CAGGTTCATTTTTATCA    |
| M0005 |           |          |      |     |                      |                      |
| 9     | V\$YY1_01 | 0.781455 | 7735 | (+) | NNNNNCCATNTWNNNWN    | CATACACATTTTACATT    |
| M0005 |           |          |      |     |                      |                      |
| 9     | V\$YY1_01 | 0.782438 | 7828 | (+) | NNNNNCCATNTWNNNWN    | CTCCAACATATTTTAAA    |
| M0005 |           |          |      |     |                      |                      |
| 9     | V\$YY1_01 | 0.826016 | 7836 | (-) | NNNNNCCATNTWNNNWN    | TATTTTAAATGAAATTG    |
| M0005 |           |          |      |     |                      |                      |
| 9     | V\$YY1_01 | 0.77097  | 7904 | (-) | NNNNNCCATNTWNNNWN    | TTCTGAACAAGGAGTTA    |
| M0005 |           |          |      |     |                      |                      |
| 9     | V\$YY1_01 | 0.771298 | 8053 | (+) | NNNNNCCATNTWNNNWN    | TCAATTCATTATCCCAA    |
| M0005 |           |          |      |     |                      |                      |
| 9     | V\$YY1_01 | 0.843381 | 8069 | (-) | NNNNNCCATNTWNNNWN    | ATCAGAAAATGTTTATG    |
| M0005 |           |          |      |     |                      |                      |
| 9     | V\$YY1_01 | 0.799148 | 8093 | (-) | NNNNNCCATNTWNNNWN    | ATTGTACCATGAAGTTT    |
| M0006 |           |          |      |     |                      |                      |
| 9     | V\$YY1_02 | 0.771689 | 8093 | (+) | NNNCGGCCATCTTGNCTSNW | ATTGTACCATGAAGTTTACA |
| M0005 |           |          |      |     |                      |                      |
| 9     | V\$YY1_01 | 0.871232 | 8157 | (+) | NNNNNCCATNTWNNNWN    | TGTCCTCATTTTGACAC    |
| M0005 |           |          |      |     |                      |                      |
| 9     | V\$YY1_01 | 0.776868 | 8168 | (-) | NNNNNCCATNTWNNNWN    | TGACACACATGGATATC    |
| M0005 |           |          |      |     |                      |                      |
| 9     | V\$YY1_01 | 0.770642 | 8276 | (+) | NNNNNCCATNTWNNNWN    | CCCAAACATTTTTTTTT    |
| M0005 |           |          |      |     |                      |                      |
| 9     | V\$YY1_01 | 0.813893 | 8307 | (+) | NNNNNCCATNTWNNNWN    | CCTCCCAGATTTTGAT     |
| M0005 |           |          |      |     |                      |                      |
| 9     | V\$YY1_01 | 0.856815 | 8380 | (+) | NNNNNCCATNTWNNNWN    | TATCAACATGTTTTATC    |
| M0005 |           |          |      |     |                      |                      |
| 9     | V\$YY1_01 | 0.799803 | 8426 | (-) | NNNNNCCATNTWNNNWN    | ATCAGACACTGGAATCC    |
| M0005 |           |          |      |     |                      |                      |
| 9     | V\$YY1_01 | 0.774246 | 8721 | (+) | NNNNNCCATNTWNNNWN    | TAAAGTCAGTTTATTAC    |
| M0006 |           |          |      |     |                      |                      |
| 9     | V\$YY1_02 | 0.751874 | 8803 | (-) | NNNCGGCCATCTTGNCTSNW | AAAAACTAACATGGCATGTT |
| M0005 |           |          |      |     |                      |                      |
| 9     | V\$YY1_01 | 0.81422  | 8805 | (-) | NNNNNCCATNTWNNNWN    | AAACTAACATGGCATGT    |
| M0005 |           |          |      |     |                      |                      |
| 9     | V\$YY1_01 | 0.797182 | 8811 | (+) | NNNNNCCATNTWNNNWN    | ACATGGCATGTTTTAAT    |

|       |            |          |       |     |                   |                    |
|-------|------------|----------|-------|-----|-------------------|--------------------|
| M0005 |            |          |       |     |                   |                    |
| 9     | V\$YY1_01  | 0.784731 | 9118  | (-) | NNNNNCCATNTWNNNWN | GA CTCTAGATGTTTACT |
| M0005 |            |          |       |     |                   |                    |
| 9     | V\$YY1_01  | 0.794233 | 9191  | (+) | NNNNNCCATNTWNNNWN | TGCTTTTCATTTAAATAT |
| M0005 |            |          |       |     |                   |                    |
| 9     | V\$YY1_01  | 0.790629 | 9198  | (-) | NNNNNCCATNTWNNNWN | ATTTAAATATTGTGTTT  |
| M0005 |            |          |       |     |                   |                    |
| 9     | V\$YY1_01  | 0.782765 | 9245  | (-) | NNNNNCCATNTWNNNWN | GTATTTAAAGGGTACTC  |
| M0005 |            |          |       |     |                   |                    |
| 9     | V\$YY1_01  | 0.782438 | 9295  | (+) | NNNNNCCATNTWNNNWN | GCTCTACCTTTTAGCAG  |
| M0005 |            |          |       |     |                   |                    |
| 9     | V\$YY1_01  | 0.861075 | 9360  | (-) | NNNNNCCATNTWNNNWN | ATTATAAAATGACAATA  |
| M0005 |            |          |       |     |                   |                    |
| 9     | V\$YY1_01  | 0.809305 | 9385  | (-) | NNNNNCCATNTWNNNWN | AATATTAAATGATGTAA  |
| M0005 |            |          |       |     |                   |                    |
| 9     | V\$YY1_01  | 0.789646 | 9412  | (+) | NNNNNCCATNTWNNNWN | GCAATCCATAGCACAAA  |
| M0005 |            |          |       |     |                   |                    |
| 9     | V\$YY1_01  | 0.814875 | 9436  | (-) | NNNNNCCATNTWNNNWN | CTCAGTAAATGTGGCTA  |
| M0005 |            |          |       |     |                   |                    |
| 9     | V\$YY1_01  | 0.82405  | 9479  | (+) | NNNNNCCATNTWNNNWN | CCACTTCATCTAATATT  |
| M0005 |            |          |       |     |                   |                    |
| 9     | V\$YY1_01  | 0.797837 | 9537  | (+) | NNNNNCCATNTWNNNWN | ACAAGTCATCTTCAATT  |
| M0005 |            |          |       |     |                   |                    |
| 9     | V\$YY1_01  | 0.798493 | 9556  | (+) | NNNNNCCATNTWNNNWN | CTTAGCCATTCTGACAC  |
| M0005 |            |          |       |     |                   |                    |
| 9     | V\$YY1_01  | 0.787025 | 9575  | (+) | NNNNNCCATNTWNNNWN | AAACACCATAAGTAAAA  |
| M0005 |            |          |       |     |                   |                    |
| 9     | V\$YY1_01  | 0.782438 | 9605  | (-) | NNNNNCCATNTWNNNWN | ATTAATATCTGACTTCA  |
| M0005 |            |          |       |     |                   |                    |
| 9     | V\$YY1_01  | 0.797182 | 9790  | (-) | NNNNNCCATNTWNNNWN | ACTTGAAAATGCTGGGA  |
| M0005 |            |          |       |     |                   |                    |
| 9     | V\$YY1_01  | 0.809961 | 9847  | (-) | NNNNNCCATNTWNNNWN | TTTCGAATAGGAAGAGC  |
| M0005 |            |          |       |     |                   |                    |
| 9     | V\$YY1_01  | 0.771625 | 9918  | (-) | NNNNNCCATNTWNNNWN | AATACAAAATTGTATTC  |
| M0005 |            |          |       |     |                   |                    |
| 9     | V\$YY1_01  | 0.865007 | 9954  | (-) | NNNNNCCATNTWNNNWN | AATTTTAAATGGGGTTT  |
| M0005 |            |          |       |     |                   |                    |
| 9     | V\$YY1_01  | 0.827654 | 9973  | (-) | NNNNNCCATNTWNNNWN | TTTTAAATATGTTTTTT  |
| M0005 |            |          |       |     |                   |                    |
| 9     | V\$YY1_01  | 0.783093 | 10112 | (+) | NNNNNCCATNTWNNNWN | CACATCCATAATTACTA  |
| M0005 |            |          |       |     |                   |                    |
| 9     | V\$YY1_01  | 0.777523 | 10241 | (-) | NNNNNCCATNTWNNNWN | ACTACTGGATGGCGAGT  |
| M0005 |            |          |       |     |                   |                    |
| 9     | V\$YY1_01  | 0.884666 | 10301 | (+) | NNNNNCCATNTWNNNWN | ACTTTCCATTTAAGGAA  |
| M0005 |            |          |       |     |                   |                    |
| 9     | V\$YY1_01  | 0.817169 | 10433 | (-) | NNNNNCCATNTWNNNWN | TGTATGAAATGGAAATA  |
| M0005 |            |          |       |     |                   |                    |
| 9     | V\$YY1_01  | 0.798493 | 10458 | (-) | NNNNNCCATNTWNNNWN | CTCACATCCTGGTGTTA  |
| M0005 |            |          |       |     |                   |                    |
| 9     | V\$YY1_01  | 0.777851 | 10511 | (+) | NNNNNCCATNTWNNNWN | TCCCTTCATCTGGTATG  |
| M0005 |            |          |       |     |                   |                    |
| 9     | V\$YY1_01  | 0.832569 | 10649 | (-) | NNNNNCCATNTWNNNWN | TTTGAACATATGATGTCA |
| M0005 |            |          |       |     |                   |                    |
| 9     | V\$YY1_01  | 0.802425 | 10681 | (-) | NNNNNCCATNTWNNNWN | CTGATGGTATGGACAGA  |
| M0005 |            |          |       |     |                   |                    |
| 9     | V\$YY1_01  | 0.788991 | 10696 | (-) | NNNNNCCATNTWNNNWN | GATCAAAAATGTATCAA  |
| M0005 |            |          |       |     |                   |                    |
| 9     | V\$YY1_01  | 0.806684 | 11014 | (+) | NNNNNCCATNTWNNNWN | ATTCATCATTTCTGATC  |
| M0005 |            |          |       |     |                   |                    |
| 9     | V\$YY1_01  | 0.872543 | 11129 | (+) | NNNNNCCATNTWNNNWN | TGTCATCATATTTTCGTA |
| M0025 |            |          |       |     |                   |                    |
| 2     | V\$TATA_01 | 0.799543 | 57    | (+) | STATAAAWRNNNNNN   | TTACATATGGCAAAA    |
| M0025 |            |          |       |     |                   |                    |
| 2     | V\$TATA_01 | 0.815275 | 114   | (+) | STATAAAWRNNNNNN   | ATTTATATGCATTTG    |
| M0021 |            |          |       |     |                   |                    |
| 6     | V\$TATA_C  | 0.750198 | 132   | (+) | NCTATAAAAR        | CTTTTCAAAT         |

|       |            |          |     |     |                 |                 |
|-------|------------|----------|-----|-----|-----------------|-----------------|
| M0021 |            |          |     |     |                 |                 |
| 6     | V\$TATA_C  | 0.893847 | 162 | (+) | NCTATAAAAR      | AGCTTAAAAA      |
| M0021 |            |          |     |     |                 |                 |
| 6     | V\$TATA_C  | 0.811724 | 163 | (+) | NCTATAAAAR      | GCTTAAAAAT      |
| M0025 |            |          |     |     |                 |                 |
| 2     | V\$TATA_01 | 0.832276 | 163 | (+) | STATAAAWRNNNNNN | GCTTAAAAATGCATT |
| M0021 |            |          |     |     |                 |                 |
| 6     | V\$TATA_C  | 0.813837 | 227 | (+) | NCTATAAAAR      | GTTTATAAA       |
| M0025 |            |          |     |     |                 |                 |
| 2     | V\$TATA_01 | 0.800812 | 228 | (+) | STATAAAWRNNNNNN | TTTTATAAACATCAA |
| M0021 |            |          |     |     |                 |                 |
| 6     | V\$TATA_C  | 0.793768 | 229 | (+) | NCTATAAAAR      | TTTATAAACA      |
| M0025 |            |          |     |     |                 |                 |
| 2     | V\$TATA_01 | 0.79117  | 230 | (+) | STATAAAWRNNNNNN | TTATAAACATCAAAT |
| M0021 |            |          |     |     |                 |                 |
| 6     | V\$TATA_C  | 0.746501 | 348 | (+) | NCTATAAAAR      | TCTATGGAAA      |
| M0021 |            |          |     |     |                 |                 |
| 6     | V\$TATA_C  | 0.759176 | 373 | (+) | NCTATAAAAR      | AATTTATAAT      |
| M0021 |            |          |     |     |                 |                 |
| 6     | V\$TATA_C  | 0.787959 | 382 | (+) | NCTATAAAAR      | TCTTTTAAAG      |
| M0025 |            |          |     |     |                 |                 |
| 2     | V\$TATA_01 | 0.774676 | 398 | (+) | STATAAAWRNNNNNN | GGATAAGAGCATTC  |
| M0021 |            |          |     |     |                 |                 |
| 6     | V\$TATA_C  | 0.878004 | 467 | (+) | NCTATAAAAR      | TCTATAAAGG      |
| M0025 |            |          |     |     |                 |                 |
| 2     | V\$TATA_01 | 0.838873 | 468 | (+) | STATAAAWRNNNNNN | CTATAAAGGATATGT |
| M0025 |            |          |     |     |                 |                 |
| 2     | V\$TATA_01 | 0.792692 | 500 | (+) | STATAAAWRNNNNNN | ATATAACTAACTACT |
| M0021 |            |          |     |     |                 |                 |
| 6     | V\$TATA_C  | 0.851862 | 557 | (+) | NCTATAAAAR      | TGGATAAAAG      |
| M0025 |            |          |     |     |                 |                 |
| 2     | V\$TATA_01 | 0.828724 | 558 | (+) | STATAAAWRNNNNNN | GGATAAAAGTAGTAA |
| M0021 |            |          |     |     |                 |                 |
| 6     | V\$TATA_C  | 0.852126 | 583 | (+) | NCTATAAAAR      | GGTTTATAAA      |
| M0025 |            |          |     |     |                 |                 |
| 2     | V\$TATA_01 | 0.833545 | 584 | (+) | STATAAAWRNNNNNN | GTTTATAAATATGTC |
| M0021 |            |          |     |     |                 |                 |
| 6     | V\$TATA_C  | 0.793768 | 585 | (+) | NCTATAAAAR      | TTTATAAATA      |
| M0025 |            |          |     |     |                 |                 |
| 2     | V\$TATA_01 | 0.855874 | 586 | (+) | STATAAAWRNNNNNN | TTATAAATATGTCTT |
| M0021 |            |          |     |     |                 |                 |
| 6     | V\$TATA_C  | 0.760496 | 643 | (+) | NCTATAAAAR      | AGTATATATA      |
| M0025 |            |          |     |     |                 |                 |
| 2     | V\$TATA_01 | 0.864248 | 644 | (+) | STATAAAWRNNNNNN | GTATATATAAAATAT |
| M0021 |            |          |     |     |                 |                 |
| 6     | V\$TATA_C  | 0.809348 | 645 | (+) | NCTATAAAAR      | TATATATAAA      |
| M0025 |            |          |     |     |                 |                 |
| 2     | V\$TATA_01 | 0.860188 | 646 | (+) | STATAAAWRNNNNNN | ATATATAAAATATGG |
| M0021 |            |          |     |     |                 |                 |
| 6     | V\$TATA_C  | 0.856351 | 647 | (+) | NCTATAAAAR      | TATATAAAAT      |
| M0025 |            |          |     |     |                 |                 |
| 2     | V\$TATA_01 | 0.859934 | 648 | (+) | STATAAAWRNNNNNN | ATATAAAATATGGCG |
| M0025 |            |          |     |     |                 |                 |
| 2     | V\$TATA_01 | 0.776706 | 683 | (+) | STATAAAWRNNNNNN | GTATGTATGATCTGT |
| M0021 |            |          |     |     |                 |                 |
| 6     | V\$TATA_C  | 0.780829 | 759 | (+) | NCTATAAAAR      | TTCTTATAAT      |
| M0021 |            |          |     |     |                 |                 |
| 6     | V\$TATA_C  | 0.758912 | 777 | (+) | NCTATAAAAR      | ACTCTAGAAG      |
| M0025 |            |          |     |     |                 |                 |
| 2     | V\$TATA_01 | 0.798021 | 874 | (+) | STATAAAWRNNNNNN | AAATATAAAATAATG |
| M0021 |            |          |     |     |                 |                 |
| 6     | V\$TATA_C  | 0.849221 | 875 | (+) | NCTATAAAAR      | AATATAAAAT      |
| M0025 |            |          |     |     |                 |                 |
| 2     | V\$TATA_01 | 0.857904 | 876 | (+) | STATAAAWRNNNNNN | ATATAAAATAATGGC |
| M0021 |            |          |     |     |                 |                 |
| 6     | V\$TATA_C  | 0.841035 | 896 | (+) | NCTATAAAAR      | TCTTTAAGAA      |



|       |            |          |      |     |                 |                 |
|-------|------------|----------|------|-----|-----------------|-----------------|
| M0025 |            |          |      |     |                 |                 |
| 2     | V\$TATA_01 | 0.77493  | 897  | (+) | STATAAAWRNNNNNN | CTTTAAGAAAATAAT |
| M0021 |            |          |      |     |                 |                 |
| 6     | V\$TATA_C  | 0.906786 | 928  | (+) | NCTATAAAAR      | TCTATATAAT      |
| M0025 |            |          |      |     |                 |                 |
| 2     | V\$TATA_01 | 0.894189 | 929  | (+) | STATAAAWRNNNNNN | CTATATAATGCACCA |
| M0021 |            |          |      |     |                 |                 |
| 6     | V\$TATA_C  | 0.740692 | 953  | (+) | NCTATAAAAR      | TTCTTAAAGA      |
| M0021 |            |          |      |     |                 |                 |
| 6     | V\$TATA_C  | 0.845524 | 980  | (+) | NCTATAAAAR      | GCTCTAAAAT      |
| M0021 |            |          |      |     |                 |                 |
| 6     | V\$TATA_C  | 0.756007 | 982  | (+) | NCTATAAAAR      | TCTAAAATAG      |
| M0021 |            |          |      |     |                 |                 |
| 6     | V\$TATA_C  | 0.847637 | 991  | (+) | NCTATAAAAR      | GATTTAAAAG      |
| M0025 |            |          |      |     |                 |                 |
| 2     | V\$TATA_01 | 0.859173 | 992  | (+) | STATAAAWRNNNNNN | ATTTAAAAGAGAAAG |
| M0021 |            |          |      |     |                 |                 |
| 6     | V\$TATA_C  | 0.750726 | 1012 | (+) | NCTATAAAAR      | TTTTTTAAAT      |
| M0021 |            |          |      |     |                 |                 |
| 6     | V\$TATA_C  | 0.779509 | 1013 | (+) | NCTATAAAAR      | TTTTTAAATG      |
| M0025 |            |          |      |     |                 |                 |
| 2     | V\$TATA_01 | 0.806902 | 1014 | (+) | STATAAAWRNNNNNN | TTTTAAATGTCAGAT |
| M0021 |            |          |      |     |                 |                 |
| 6     | V\$TATA_C  | 0.761025 | 1067 | (+) | NCTATAAAAR      | ATTTTAACAA      |
| M0025 |            |          |      |     |                 |                 |
| 2     | V\$TATA_01 | 0.798275 | 1118 | (+) | STATAAAWRNNNNNN | ATATTTAAAAATTGA |
| M0021 |            |          |      |     |                 |                 |
| 6     | V\$TATA_C  | 0.848165 | 1119 | (+) | NCTATAAAAR      | TATTTAAAAA      |
| M0021 |            |          |      |     |                 |                 |
| 6     | V\$TATA_C  | 0.743597 | 1120 | (+) | NCTATAAAAR      | ATTTAAAAAT      |
| M0025 |            |          |      |     |                 |                 |
| 2     | V\$TATA_01 | 0.840396 | 1120 | (+) | STATAAAWRNNNNNN | ATTTAAAAATTGAGT |
| M0021 |            |          |      |     |                 |                 |
| 6     | V\$TATA_C  | 0.760496 | 1135 | (+) | NCTATAAAAR      | AGTATTTAAA      |
| M0025 |            |          |      |     |                 |                 |
| 2     | V\$TATA_01 | 0.821365 | 1136 | (+) | STATAAAWRNNNNNN | GTATTTAAATATGAA |
| M0025 |            |          |      |     |                 |                 |
| 2     | V\$TATA_01 | 0.853844 | 1138 | (+) | STATAAAWRNNNNNN | ATTTAAATATGAATG |
| M0025 |            |          |      |     |                 |                 |
| 2     | V\$TATA_01 | 0.808171 | 1144 | (+) | STATAAAWRNNNNNN | ATATGAATGCCTCTC |
| M0021 |            |          |      |     |                 |                 |
| 6     | V\$TATA_C  | 0.873515 | 1221 | (+) | NCTATAAAAR      | TGAATAAAAA      |
| M0025 |            |          |      |     |                 |                 |
| 2     | V\$TATA_01 | 0.799797 | 1222 | (+) | STATAAAWRNNNNNN | GAATAAAAATATTAA |
| M0025 |            |          |      |     |                 |                 |
| 2     | V\$TATA_01 | 0.825679 | 1230 | (+) | STATAAAWRNNNNNN | ATATTAATAAGAGAC |
| M0025 |            |          |      |     |                 |                 |
| 2     | V\$TATA_01 | 0.784572 | 1297 | (+) | STATAAAWRNNNNNN | ATTTATATTGAATAG |
| M0021 |            |          |      |     |                 |                 |
| 6     | V\$TATA_C  | 0.760496 | 1314 | (+) | NCTATAAAAR      | AAATTAAAAA      |
| M0025 |            |          |      |     |                 |                 |
| 2     | V\$TATA_01 | 0.789901 | 1323 | (+) | STATAAAWRNNNNNN | ATTTAAATTAGTAAA |
| M0025 |            |          |      |     |                 |                 |
| 2     | V\$TATA_01 | 0.772139 | 1333 | (+) | STATAAAWRNNNNNN | GTAAAAATATTAAAC |
| M0025 |            |          |      |     |                 |                 |
| 2     | V\$TATA_01 | 0.791677 | 1339 | (+) | STATAAAWRNNNNNN | ATATTAAACAAATGA |
| M0021 |            |          |      |     |                 |                 |
| 6     | V\$TATA_C  | 0.760232 | 1364 | (+) | NCTATAAAAR      | ATTATAACAC      |
| M0025 |            |          |      |     |                 |                 |
| 2     | V\$TATA_01 | 0.793453 | 1409 | (+) | STATAAAWRNNNNNN | ATATGAAACCAAATT |
| M0021 |            |          |      |     |                 |                 |
| 6     | V\$TATA_C  | 0.744389 | 1608 | (+) | NCTATAAAAR      | AGAATAATAA      |
| M0021 |            |          |      |     |                 |                 |
| 6     | V\$TATA_C  | 0.745973 | 1640 | (+) | NCTATAAAAR      | GCTATTGAAG      |
| M0021 |            |          |      |     |                 |                 |
| 6     | V\$TATA_C  | 0.776076 | 1655 | (+) | NCTATAAAAR      | ATATTAAAAC      |

|       |            |          |      |     |                 |                 |
|-------|------------|----------|------|-----|-----------------|-----------------|
| M0025 |            |          |      |     |                 |                 |
| 2     | V\$TATA_01 | 0.820858 | 1655 | (+) | STATAAAWRNNNNNN | ATATTAAACTATGA  |
| M0021 |            |          |      |     |                 |                 |
| 6     | V\$TATA_C  | 0.774756 | 1718 | (+) | NCTATAAAAR      | TCCAAATAAA      |
| M0021 |            |          |      |     |                 |                 |
| 6     | V\$TATA_C  | 0.775284 | 1720 | (+) | NCTATAAAAR      | CAAATAAAAT      |
| M0025 |            |          |      |     |                 |                 |
| 2     | V\$TATA_01 | 0.784065 | 1721 | (+) | STATAAAWRNNNNNN | AAATAAAATCTCTGC |
| M0021 |            |          |      |     |                 |                 |
| 6     | V\$TATA_C  | 0.761553 | 1733 | (+) | NCTATAAAAR      | TGCTTGAAAT      |
| M0025 |            |          |      |     |                 |                 |
| 2     | V\$TATA_01 | 0.799036 | 1739 | (+) | STATAAAWRNNNNNN | AAATATAAATCTCTC |
| M0025 |            |          |      |     |                 |                 |
| 2     | V\$TATA_01 | 0.841411 | 1741 | (+) | STATAAAWRNNNNNN | ATATAAATCTCTCAT |
| M0021 |            |          |      |     |                 |                 |
| 6     | V\$TATA_C  | 0.795088 | 1754 | (+) | NCTATAAAAR      | ATGATAAAAA      |
| M0025 |            |          |      |     |                 |                 |
| 2     | V\$TATA_01 | 0.786602 | 1755 | (+) | STATAAAWRNNNNNN | TGATAAAAAATAATA |
| M0021 |            |          |      |     |                 |                 |
| 6     | V\$TATA_C  | 0.828096 | 1773 | (+) | NCTATAAAAR      | ATAATAAAAA      |
| M0025 |            |          |      |     |                 |                 |
| 2     | V\$TATA_01 | 0.798275 | 1774 | (+) | STATAAAWRNNNNNN | TAATAAAAAAGTAAA |
| M0021 |            |          |      |     |                 |                 |
| 6     | V\$TATA_C  | 0.756007 | 1775 | (+) | NCTATAAAAR      | AATAAAAAAG      |
| M0025 |            |          |      |     |                 |                 |
| 2     | V\$TATA_01 | 0.790916 | 1776 | (+) | STATAAAWRNNNNNN | ATAAAAAAGTAAAGA |
| M0021 |            |          |      |     |                 |                 |
| 6     | V\$TATA_C  | 0.757592 | 1788 | (+) | NCTATAAAAR      | AGAATAGAAG      |
| M0021 |            |          |      |     |                 |                 |
| 6     | V\$TATA_C  | 0.793768 | 1804 | (+) | NCTATAAAAR      | GGTATCAAAC      |
| M0021 |            |          |      |     |                 |                 |
| 6     | V\$TATA_C  | 0.80882  | 1826 | (+) | NCTATAAAAR      | AGCATCAAAG      |
| M0025 |            |          |      |     |                 |                 |
| 2     | V\$TATA_01 | 0.782289 | 1878 | (+) | STATAAAWRNNNNNN | GTATTTGTAAACATA |
| M0025 |            |          |      |     |                 |                 |
| 2     | V\$TATA_01 | 0.771885 | 1888 | (+) | STATAAAWRNNNNNN | ACATATGTGTCCAAT |
| M0025 |            |          |      |     |                 |                 |
| 2     | V\$TATA_01 | 0.801319 | 1923 | (+) | STATAAAWRNNNNNN | ACATAAAGCCGTATA |
| M0021 |            |          |      |     |                 |                 |
| 6     | V\$TATA_C  | 0.822023 | 2012 | (+) | NCTATAAAAR      | GGTATAGAAA      |
| M0025 |            |          |      |     |                 |                 |
| 2     | V\$TATA_01 | 0.819081 | 2013 | (+) | STATAAAWRNNNNNN | GTATAGAAAATCAGG |
| M0025 |            |          |      |     |                 |                 |
| 2     | V\$TATA_01 | 0.771885 | 2015 | (+) | STATAAAWRNNNNNN | ATAGAAAATCAGGCT |
| M0021 |            |          |      |     |                 |                 |
| 6     | V\$TATA_C  | 0.745973 | 2066 | (+) | NCTATAAAAR      | CCTATAGACA      |
| M0021 |            |          |      |     |                 |                 |
| 6     | V\$TATA_C  | 0.743068 | 2093 | (+) | NCTATAAAAR      | AAATTAAT        |
| M0021 |            |          |      |     |                 |                 |
| 6     | V\$TATA_C  | 0.740692 | 2108 | (+) | NCTATAAAAR      | TTCTCAAAAA      |
| M0021 |            |          |      |     |                 |                 |
| 6     | V\$TATA_C  | 0.759704 | 2114 | (+) | NCTATAAAAR      | AAAATAAAC       |
| M0025 |            |          |      |     |                 |                 |
| 2     | V\$TATA_01 | 0.783811 | 2115 | (+) | STATAAAWRNNNNNN | AAATAAAACAAAAAA |
| M0025 |            |          |      |     |                 |                 |
| 2     | V\$TATA_01 | 0.808678 | 2142 | (+) | STATAAAWRNNNNNN | TTACATAAAGCAAAA |
| M0025 |            |          |      |     |                 |                 |
| 2     | V\$TATA_01 | 0.786602 | 2144 | (+) | STATAAAWRNNNNNN | ACATAAAGCAAAAAG |
| M0021 |            |          |      |     |                 |                 |
| 6     | V\$TATA_C  | 0.752575 | 2222 | (+) | NCTATAAAAR      | ACAAGAAAAC      |
| M0021 |            |          |      |     |                 |                 |
| 6     | V\$TATA_C  | 0.742276 | 2236 | (+) | NCTATAAAAR      | CAGATAAAT       |
| M0025 |            |          |      |     |                 |                 |
| 2     | V\$TATA_01 | 0.78305  | 2237 | (+) | STATAAAWRNNNNNN | AGATAAAATAATGGT |
| M0021 |            |          |      |     |                 |                 |
| 6     | V\$TATA_C  | 0.842091 | 2273 | (+) | NCTATAAAAR      | ACTATCAAAT      |

|       |            |          |      |     |                 |                  |
|-------|------------|----------|------|-----|-----------------|------------------|
| M0025 |            |          |      |     |                 |                  |
| 2     | V\$TATA_01 | 0.774423 | 2341 | (+) | STATAAAWRNNNNNN | ATATTTAGAAAAATGC |
| M0021 |            |          |      |     |                 |                  |
| 6     | V\$TATA_C  | 0.77634  | 2344 | (+) | NCTATAAAAR      | TTTAGAAAAAT      |
| M0021 |            |          |      |     |                 |                  |
| 6     | V\$TATA_C  | 0.752046 | 2384 | (+) | NCTATAAAAR      | TTCTTAACAG       |
| M0021 |            |          |      |     |                 |                  |
| 6     | V\$TATA_C  | 0.781885 | 2448 | (+) | NCTATAAAAR      | GTTACAAAAA       |
| M0025 |            |          |      |     |                 |                  |
| 2     | V\$TATA_01 | 0.794215 | 2449 | (+) | STATAAAWRNNNNNN | TTACAAAAATAAATC  |
| M0025 |            |          |      |     |                 |                  |
| 2     | V\$TATA_01 | 0.795483 | 2455 | (+) | STATAAAWRNNNNNN | AAATAAATCCAAGTC  |
| M0021 |            |          |      |     |                 |                  |
| 6     | V\$TATA_C  | 0.769475 | 2508 | (+) | NCTATAAAAR      | CTTTTACAAA       |
| M0025 |            |          |      |     |                 |                  |
| 2     | V\$TATA_01 | 0.780766 | 2511 | (+) | STATAAAWRNNNNNN | TTACAAATGAAATGG  |
| M0021 |            |          |      |     |                 |                  |
| 6     | V\$TATA_C  | 0.793768 | 2537 | (+) | NCTATAAAAR      | CCAGTAAAAA       |
| M0021 |            |          |      |     |                 |                  |
| 6     | V\$TATA_C  | 0.824927 | 2539 | (+) | NCTATAAAAR      | AGTAAAAAAA       |
| M0025 |            |          |      |     |                 |                  |
| 2     | V\$TATA_01 | 0.786349 | 2540 | (+) | STATAAAWRNNNNNN | GTAAAAAAATAGTTT  |
| M0021 |            |          |      |     |                 |                  |
| 6     | V\$TATA_C  | 0.763929 | 2678 | (+) | NCTATAAAAR      | GAAATAAAAT       |
| M0025 |            |          |      |     |                 |                  |
| 2     | V\$TATA_01 | 0.806648 | 2679 | (+) | STATAAAWRNNNNNN | AAATAAAATCCAGAC  |
| M0021 |            |          |      |     |                 |                  |
| 6     | V\$TATA_C  | 0.740956 | 2727 | (+) | NCTATAAAAR      | GCTCCAAAAA       |
| M0021 |            |          |      |     |                 |                  |
| 6     | V\$TATA_C  | 0.777132 | 2745 | (+) | NCTATAAAAR      | GGTTTAAAGT       |
| M0025 |            |          |      |     |                 |                  |
| 2     | V\$TATA_01 | 0.808171 | 2746 | (+) | STATAAAWRNNNNNN | GTTTAAAGTCACCTT  |
| M0021 |            |          |      |     |                 |                  |
| 6     | V\$TATA_C  | 0.815949 | 2757 | (+) | NCTATAAAAR      | CCTTTAGAAC       |
| M0021 |            |          |      |     |                 |                  |
| 6     | V\$TATA_C  | 0.750198 | 2768 | (+) | NCTATAAAAR      | ACCATGTAAT       |
| M0021 |            |          |      |     |                 |                  |
| 6     | V\$TATA_C  | 0.758912 | 2773 | (+) | NCTATAAAAR      | GTAATATAAA       |
| M0025 |            |          |      |     |                 |                  |
| 2     | V\$TATA_01 | 0.839127 | 2776 | (+) | STATAAAWRNNNNNN | ATATAAATTGTTTCAG |
| M0021 |            |          |      |     |                 |                  |
| 6     | V\$TATA_C  | 0.759176 | 2805 | (+) | NCTATAAAAR      | TCTTTATCAT       |
| M0021 |            |          |      |     |                 |                  |
| 6     | V\$TATA_C  | 0.745709 | 2897 | (+) | NCTATAAAAR      | ACTCTAAAGA       |
| M0021 |            |          |      |     |                 |                  |
| 6     | V\$TATA_C  | 0.769475 | 2920 | (+) | NCTATAAAAR      | ACTTTTTAAA       |
| M0021 |            |          |      |     |                 |                  |
| 6     | V\$TATA_C  | 0.750198 | 2921 | (+) | NCTATAAAAR      | CTTTTTAAAT       |
| M0021 |            |          |      |     |                 |                  |
| 6     | V\$TATA_C  | 0.750726 | 2922 | (+) | NCTATAAAAR      | TTTTTAAATT       |
| M0021 |            |          |      |     |                 |                  |
| 6     | V\$TATA_C  | 0.890679 | 2936 | (+) | NCTATAAAAR      | TCAATAAAAT       |
| M0021 |            |          |      |     |                 |                  |
| 6     | V\$TATA_C  | 0.838659 | 2958 | (+) | NCTATAAAAR      | CCCAGAAAAA       |
| M0021 |            |          |      |     |                 |                  |
| 6     | V\$TATA_C  | 0.854766 | 2988 | (+) | NCTATAAAAR      | GCTATTAAAA       |
| M0021 |            |          |      |     |                 |                  |
| 6     | V\$TATA_C  | 0.791656 | 2989 | (+) | NCTATAAAAR      | CTATTAAAAAT      |
| M0025 |            |          |      |     |                 |                  |
| 2     | V\$TATA_01 | 0.859173 | 2989 | (+) | STATAAAWRNNNNNN | CTATTAAAAATACAAA |
| M0021 |            |          |      |     |                 |                  |
| 6     | V\$TATA_C  | 0.740692 | 3007 | (+) | NCTATAAAAR      | TTCTTAAATA       |
| M0025 |            |          |      |     |                 |                  |
| 2     | V\$TATA_01 | 0.802588 | 3008 | (+) | STATAAAWRNNNNNN | TCTTAAATAGCAACA  |
| M0021 |            |          |      |     |                 |                  |
| 6     | V\$TATA_C  | 0.822023 | 3098 | (+) | NCTATAAAAR      | GTTATATAAT       |

|       |            |          |      |     |                 |                  |
|-------|------------|----------|------|-----|-----------------|------------------|
| M0025 |            |          |      |     |                 |                  |
| 2     | V\$TATA_01 | 0.824156 | 3099 | (+) | STATAAAWRNNNNNN | TTATATAATTCTTGC  |
| M0021 |            |          |      |     |                 |                  |
| 6     | V\$TATA_C  | 0.810404 | 3258 | (+) | NCTATAAAAR      | TCTCTATAAA       |
| M0025 |            |          |      |     |                 |                  |
| 2     | V\$TATA_01 | 0.794722 | 3259 | (+) | STATAAAWRNNNNNN | CTCTATAAAGTCAGT  |
| M0021 |            |          |      |     |                 |                  |
| 6     | V\$TATA_C  | 0.849221 | 3260 | (+) | NCTATAAAAR      | TCTATAAAGT       |
| M0025 |            |          |      |     |                 |                  |
| 2     | V\$TATA_01 | 0.846232 | 3261 | (+) | STATAAAWRNNNNNN | CTATAAAGTCAGTTT  |
| M0021 |            |          |      |     |                 |                  |
| 6     | V\$TATA_C  | 0.802746 | 3288 | (+) | NCTATAAAAR      | GGTATAATAT       |
| M0025 |            |          |      |     |                 |                  |
| 2     | V\$TATA_01 | 0.780513 | 3289 | (+) | STATAAAWRNNNNNN | GTATAATATCTTCAG  |
| M0025 |            |          |      |     |                 |                  |
| 2     | V\$TATA_01 | 0.817559 | 3370 | (+) | STATAAAWRNNNNNN | ACATAAATATTTATG  |
| M0025 |            |          |      |     |                 |                  |
| 2     | V\$TATA_01 | 0.777721 | 3376 | (+) | STATAAAWRNNNNNN | ATATTTATGATTAAT  |
| M0021 |            |          |      |     |                 |                  |
| 6     | V\$TATA_C  | 0.743597 | 3441 | (+) | NCTATAAAAR      | ATTTTAAATT       |
| M0021 |            |          |      |     |                 |                  |
| 6     | V\$TATA_C  | 0.757328 | 3487 | (+) | NCTATAAAAR      | AACATATAAT       |
| M0025 |            |          |      |     |                 |                  |
| 2     | V\$TATA_01 | 0.79523  | 3490 | (+) | STATAAAWRNNNNNN | ATATAATTTGCAATT  |
| M0021 |            |          |      |     |                 |                  |
| 6     | V\$TATA_C  | 0.756007 | 3540 | (+) | NCTATAAAAR      | TCTACAAACAG      |
| M0025 |            |          |      |     |                 |                  |
| 2     | V\$TATA_01 | 0.775438 | 3550 | (+) | STATAAAWRNNNNNN | CCATTAATCCACTCT  |
| M0025 |            |          |      |     |                 |                  |
| 2     | V\$TATA_01 | 0.773408 | 3576 | (+) | STATAAAWRNNNNNN | GAATTAATACCTTTT  |
| M0021 |            |          |      |     |                 |                  |
| 6     | V\$TATA_C  | 0.865593 | 3876 | (+) | NCTATAAAAR      | ATTTTAAAAAT      |
| M0025 |            |          |      |     |                 |                  |
| 2     | V\$TATA_01 | 0.801827 | 3877 | (+) | STATAAAWRNNNNNN | TTTTAAAAATTAGATC |
| M0025 |            |          |      |     |                 |                  |
| 2     | V\$TATA_01 | 0.789394 | 3963 | (+) | STATAAAWRNNNNNN | GTTCAAATGGAAAAAC |
| M0021 |            |          |      |     |                 |                  |
| 6     | V\$TATA_C  | 0.808292 | 4004 | (+) | NCTATAAAAR      | TTTTTATAAT       |
| M0021 |            |          |      |     |                 |                  |
| 6     | V\$TATA_C  | 0.797465 | 4041 | (+) | NCTATAAAAR      | TCAACAAAAG       |
| M0021 |            |          |      |     |                 |                  |
| 6     | V\$TATA_C  | 0.783998 | 4093 | (+) | NCTATAAAAR      | CTTCTAAAAAT      |
| M0021 |            |          |      |     |                 |                  |
| 6     | V\$TATA_C  | 0.740692 | 4113 | (+) | NCTATAAAAR      | TTCTTGAAAA       |
| M0021 |            |          |      |     |                 |                  |
| 6     | V\$TATA_C  | 0.841035 | 4114 | (+) | NCTATAAAAR      | TCTTGAAAAA       |
| M0021 |            |          |      |     |                 |                  |
| 6     | V\$TATA_C  | 0.757064 | 4198 | (+) | NCTATAAAAR      | ACTGAAAAAG       |
| M0021 |            |          |      |     |                 |                  |
| 6     | V\$TATA_C  | 0.744653 | 4229 | (+) | NCTATAAAAR      | AATATTAAAA       |
| M0021 |            |          |      |     |                 |                  |
| 6     | V\$TATA_C  | 0.802482 | 4230 | (+) | NCTATAAAAR      | ATATTAAAAA       |
| M0025 |            |          |      |     |                 |                  |
| 2     | V\$TATA_01 | 0.848008 | 4230 | (+) | STATAAAWRNNNNNN | ATATTAAAAAGCTGC  |
| M0021 |            |          |      |     |                 |                  |
| 6     | V\$TATA_C  | 0.761553 | 4242 | (+) | NCTATAAAAR      | TGCTTTAAAT       |
| M0021 |            |          |      |     |                 |                  |
| 6     | V\$TATA_C  | 0.811724 | 4243 | (+) | NCTATAAAAR      | GCTTTAAATT       |
| M0025 |            |          |      |     |                 |                  |
| 2     | V\$TATA_01 | 0.788632 | 4244 | (+) | STATAAAWRNNNNNN | CTTTAAATTTTAATT  |
| M0021 |            |          |      |     |                 |                  |
| 6     | V\$TATA_C  | 0.745445 | 4307 | (+) | NCTATAAAAR      | ATTTTACAAT       |
| M0021 |            |          |      |     |                 |                  |
| 6     | V\$TATA_C  | 0.800634 | 4325 | (+) | NCTATAAAAR      | TCATTATAAT       |
| M0025 |            |          |      |     |                 |                  |
| 2     | V\$TATA_01 | 0.780766 | 4326 | (+) | STATAAAWRNNNNNN | CATTATAATGGAATG  |

|       |            |          |      |     |                 |                 |
|-------|------------|----------|------|-----|-----------------|-----------------|
| M0021 |            |          |      |     |                 |                 |
| 6     | V\$TATA_C  | 0.78479  | 4350 | (+) | NCTATAAAAR      | TCTAGATAAT      |
| M0021 |            |          |      |     |                 |                 |
| 6     | V\$TATA_C  | 0.803274 | 4440 | (+) | NCTATAAAAR      | ACTGTATAAA      |
| M0021 |            |          |      |     |                 |                 |
| 6     | V\$TATA_C  | 0.936625 | 4442 | (+) | NCTATAAAAR      | TGTATAAAAT      |
| M0025 |            |          |      |     |                 |                 |
| 2     | V\$TATA_01 | 0.839635 | 4443 | (+) | STATAAAWRNNNNNN | GTATAAAATATTTGA |
| M0021 |            |          |      |     |                 |                 |
| 6     | V\$TATA_C  | 0.750726 | 4484 | (+) | NCTATAAAAR      | TTTTTAACAT      |
| M0025 |            |          |      |     |                 |                 |
| 2     | V\$TATA_01 | 0.797767 | 4638 | (+) | STATAAAWRNNNNNN | CTTTTTATGGAAATA |
| M0021 |            |          |      |     |                 |                 |
| 6     | V\$TATA_C  | 0.761553 | 4730 | (+) | NCTATAAAAR      | ACAACAAAAT      |
| M0021 |            |          |      |     |                 |                 |
| 6     | V\$TATA_C  | 0.865593 | 4753 | (+) | NCTATAAAAR      | ATTTTAAAAT      |
| M0025 |            |          |      |     |                 |                 |
| 2     | V\$TATA_01 | 0.792692 | 4763 | (+) | STATAAAWRNNNNNN | ATTTTAAAGTGCACA |
| M0025 |            |          |      |     |                 |                 |
| 2     | V\$TATA_01 | 0.777468 | 4765 | (+) | STATAAAWRNNNNNN | TTTTAAGTGCACATT |
| M0021 |            |          |      |     |                 |                 |
| 6     | V\$TATA_C  | 0.833905 | 4792 | (+) | NCTATAAAAR      | ACTTTAAAGA      |
| M0025 |            |          |      |     |                 |                 |
| 2     | V\$TATA_01 | 0.815022 | 4793 | (+) | STATAAAWRNNNNNN | CTTTAAAGAAAGCTT |
| M0025 |            |          |      |     |                 |                 |
| 2     | V\$TATA_01 | 0.771378 | 4848 | (+) | STATAAAWRNNNNNN | ATATTAGTGCAGTCA |
| M0021 |            |          |      |     |                 |                 |
| 6     | V\$TATA_C  | 0.754423 | 4859 | (+) | NCTATAAAAR      | GTCACAAAAA      |
| M0021 |            |          |      |     |                 |                 |
| 6     | V\$TATA_C  | 0.752575 | 4862 | (+) | NCTATAAAAR      | ACAAAAAAAC      |
| M0025 |            |          |      |     |                 |                 |
| 2     | V\$TATA_01 | 0.78711  | 4880 | (+) | STATAAAWRNNNNNN | CTTTAATTTGCAGT  |
| M0025 |            |          |      |     |                 |                 |
| 2     | V\$TATA_01 | 0.77087  | 5018 | (+) | STATAAAWRNNNNNN | ATATTTAAATTATTT |
| M0021 |            |          |      |     |                 |                 |
| 6     | V\$TATA_C  | 0.894375 | 5029 | (+) | NCTATAAAAR      | ATTTTAAAAG      |
| M0025 |            |          |      |     |                 |                 |
| 2     | V\$TATA_01 | 0.784826 | 5029 | (+) | STATAAAWRNNNNNN | ATTTTAAAAGTTAGT |
| M0025 |            |          |      |     |                 |                 |
| 2     | V\$TATA_01 | 0.79117  | 5030 | (+) | STATAAAWRNNNNNN | TTTTAAAAGTTAGTC |
| M0021 |            |          |      |     |                 |                 |
| 6     | V\$TATA_C  | 0.840507 | 5044 | (+) | NCTATAAAAR      | CCTTCAAAA       |
| M0021 |            |          |      |     |                 |                 |
| 6     | V\$TATA_C  | 0.767626 | 5045 | (+) | NCTATAAAAR      | CTTCAAAAA       |
| M0021 |            |          |      |     |                 |                 |
| 6     | V\$TATA_C  | 0.748878 | 5047 | (+) | NCTATAAAAR      | TTCAAAAAAT      |
| M0025 |            |          |      |     |                 |                 |
| 2     | V\$TATA_01 | 0.771885 | 5055 | (+) | STATAAAWRNNNNNN | ATATATTTTACAAGT |
| M0021 |            |          |      |     |                 |                 |
| 6     | V\$TATA_C  | 0.774228 | 5059 | (+) | NCTATAAAAR      | ATTTTACAAG      |
| M0021 |            |          |      |     |                 |                 |
| 6     | V\$TATA_C  | 0.792712 | 5157 | (+) | NCTATAAAAR      | GGCAAAAAAA      |
| M0021 |            |          |      |     |                 |                 |
| 6     | V\$TATA_C  | 0.7568   | 5158 | (+) | NCTATAAAAR      | GCAAAAAAAT      |
| M0021 |            |          |      |     |                 |                 |
| 6     | V\$TATA_C  | 0.793768 | 5197 | (+) | NCTATAAAAR      | TTAGAAAAA       |
| M0021 |            |          |      |     |                 |                 |
| 6     | V\$TATA_C  | 0.821231 | 5235 | (+) | NCTATAAAAR      | CCCATAAACT      |
| M0021 |            |          |      |     |                 |                 |
| 6     | V\$TATA_C  | 0.833905 | 5242 | (+) | NCTATAAAAR      | ACTTCAAAA       |
| M0021 |            |          |      |     |                 |                 |
| 6     | V\$TATA_C  | 0.750198 | 5243 | (+) | NCTATAAAAR      | CTTCAAAAAT      |
| M0021 |            |          |      |     |                 |                 |
| 6     | V\$TATA_C  | 0.807499 | 5301 | (+) | NCTATAAAAR      | ACTTTAAAGC      |
| M0025 |            |          |      |     |                 |                 |
| 2     | V\$TATA_01 | 0.773915 | 5302 | (+) | STATAAAWRNNNNNN | CTTTAAAGCTGTGAA |

|       |            |          |      |     |                 |                 |
|-------|------------|----------|------|-----|-----------------|-----------------|
| M0025 |            |          |      |     |                 |                 |
| 2     | V\$TATA_01 | 0.802081 | 5331 | (+) | STATAAAWRNNNNNN | GTATGAATGAATAAA |
| M0021 |            |          |      |     |                 |                 |
| 6     | V\$TATA_C  | 0.762873 | 5338 | (+) | NCTATAAAAR      | TGAATAAATG      |
| M0025 |            |          |      |     |                 |                 |
| 2     | V\$TATA_01 | 0.832022 | 5339 | (+) | STATAAAWRNNNNNN | GAATAAATGGATGAA |
| M0021 |            |          |      |     |                 |                 |
| 6     | V\$TATA_C  | 0.762873 | 5358 | (+) | NCTATAAAAR      | TGAATAAATG      |
| M0025 |            |          |      |     |                 |                 |
| 2     | V\$TATA_01 | 0.827709 | 5359 | (+) | STATAAAWRNNNNNN | GAATAAATGCAATTA |
| M0021 |            |          |      |     |                 |                 |
| 6     | V\$TATA_C  | 0.824927 | 5393 | (+) | NCTATAAAAR      | AGTATCAAAA      |
| M0025 |            |          |      |     |                 |                 |
| 2     | V\$TATA_01 | 0.79726  | 5394 | (+) | STATAAAWRNNNNNN | GTATCAAAACTGAAA |
| M0021 |            |          |      |     |                 |                 |
| 6     | V\$TATA_C  | 0.844204 | 5427 | (+) | NCTATAAAAR      | ATTATATAAA      |
| M0025 |            |          |      |     |                 |                 |
| 2     | V\$TATA_01 | 0.924638 | 5428 | (+) | STATAAAWRNNNNNN | TTATATAAAGCAACG |
| M0025 |            |          |      |     |                 |                 |
| 2     | V\$TATA_01 | 0.826947 | 5430 | (+) | STATAAAWRNNNNNN | ATATAAAGCAACGTA |
| M0021 |            |          |      |     |                 |                 |
| 6     | V\$TATA_C  | 0.740956 | 5448 | (+) | NCTATAAAAR      | GCTCTAAGAA      |
| M0021 |            |          |      |     |                 |                 |
| 6     | V\$TATA_C  | 0.740692 | 5486 | (+) | NCTATAAAAR      | TTCTTGAAAA      |
| M0021 |            |          |      |     |                 |                 |
| 6     | V\$TATA_C  | 0.841035 | 5487 | (+) | NCTATAAAAR      | TCTTGAAAAA      |
| M0021 |            |          |      |     |                 |                 |
| 6     | V\$TATA_C  | 0.779509 | 5527 | (+) | NCTATAAAAR      | TTTTTAATAG      |
| M0025 |            |          |      |     |                 |                 |
| 2     | V\$TATA_01 | 0.787364 | 5527 | (+) | STATAAAWRNNNNNN | TTTTTAATAGAGGCC |
| M0021 |            |          |      |     |                 |                 |
| 6     | V\$TATA_C  | 0.761553 | 5560 | (+) | NCTATAAAAR      | TGCTCAAAAT      |
| M0025 |            |          |      |     |                 |                 |
| 2     | V\$TATA_01 | 0.799036 | 5580 | (+) | STATAAAWRNNNNNN | AAATAAATATCTTTG |
| M0021 |            |          |      |     |                 |                 |
| 6     | V\$TATA_C  | 0.750198 | 5589 | (+) | NCTATAAAAR      | TCTTTGTAAC      |
| M0021 |            |          |      |     |                 |                 |
| 6     | V\$TATA_C  | 0.750726 | 5679 | (+) | NCTATAAAAR      | TTTTTAACT       |
| M0021 |            |          |      |     |                 |                 |
| 6     | V\$TATA_C  | 0.842091 | 5686 | (+) | NCTATAAAAR      | ACTATTAAAT      |
| M0025 |            |          |      |     |                 |                 |
| 2     | V\$TATA_01 | 0.82644  | 5687 | (+) | STATAAAWRNNNNNN | CTATTAAATATAAGG |
| M0021 |            |          |      |     |                 |                 |
| 6     | V\$TATA_C  | 0.740164 | 5691 | (+) | NCTATAAAAR      | TAAATATAAG      |
| M0025 |            |          |      |     |                 |                 |
| 2     | V\$TATA_01 | 0.838873 | 5692 | (+) | STATAAAWRNNNNNN | AAATATAAGGAAAAG |
| M0025 |            |          |      |     |                 |                 |
| 2     | V\$TATA_01 | 0.772139 | 5694 | (+) | STATAAAWRNNNNNN | ATATAAGGAAAAGAA |
| M0021 |            |          |      |     |                 |                 |
| 6     | V\$TATA_C  | 0.796145 | 5724 | (+) | NCTATAAAAR      | TCCTTTAAAT      |
| M0021 |            |          |      |     |                 |                 |
| 6     | V\$TATA_C  | 0.840507 | 5725 | (+) | NCTATAAAAR      | CCTTTAAATA      |
| M0025 |            |          |      |     |                 |                 |
| 2     | V\$TATA_01 | 0.883786 | 5726 | (+) | STATAAAWRNNNNNN | CTTTAAATACCCTGC |
| M0021 |            |          |      |     |                 |                 |
| 6     | V\$TATA_C  | 0.751518 | 5747 | (+) | NCTATAAAAR      | TGAATAAATA      |
| M0025 |            |          |      |     |                 |                 |
| 2     | V\$TATA_01 | 0.827201 | 5748 | (+) | STATAAAWRNNNNNN | GAATAAATAAGTCTC |
| M0025 |            |          |      |     |                 |                 |
| 2     | V\$TATA_01 | 0.805887 | 5818 | (+) | STATAAAWRNNNNNN | GCATATGAAAGCCAG |
| M0021 |            |          |      |     |                 |                 |
| 6     | V\$TATA_C  | 0.762609 | 5819 | (+) | NCTATAAAAR      | CATATGAAAG      |
| M0025 |            |          |      |     |                 |                 |
| 2     | V\$TATA_01 | 0.81832  | 5820 | (+) | STATAAAWRNNNNNN | ATATGAAAGCCAGAA |
| M0021 |            |          |      |     |                 |                 |
| 6     | V\$TATA_C  | 0.754423 | 5901 | (+) | NCTATAAAAR      | GTCATGAAAA      |

|       |            |          |      |     |                 |                 |
|-------|------------|----------|------|-----|-----------------|-----------------|
| M0021 |            |          |      |     |                 |                 |
| 6     | V\$TATA_C  | 0.778981 | 5947 | (+) | NCTATAAAAR      | TGCTTAAATA      |
| M0025 |            |          |      |     |                 |                 |
| 2     | V\$TATA_01 | 0.814514 | 5954 | (+) | STATAAAWRNNNNNN | ATATTTATATGCCAT |
| M0025 |            |          |      |     |                 |                 |
| 2     | V\$TATA_01 | 0.837605 | 5956 | (+) | STATAAAWRNNNNNN | ATTTATATGCCATTG |
| M0021 |            |          |      |     |                 |                 |
| 6     | V\$TATA_C  | 0.758648 | 5999 | (+) | NCTATAAAAR      | CCTTTTAAAT      |
| M0021 |            |          |      |     |                 |                 |
| 6     | V\$TATA_C  | 0.750726 | 6001 | (+) | NCTATAAAAR      | TTTTTAATAT      |
| M0021 |            |          |      |     |                 |                 |
| 6     | V\$TATA_C  | 0.753367 | 6004 | (+) | NCTATAAAAR      | TTAATATAAT      |
| M0025 |            |          |      |     |                 |                 |
| 2     | V\$TATA_01 | 0.7729   | 6005 | (+) | STATAAAWRNNNNNN | TAATATAATGCTCCT |
| M0021 |            |          |      |     |                 |                 |
| 6     | V\$TATA_C  | 0.761553 | 6019 | (+) | NCTATAAAAR      | TGCTTAACAT      |
| M0021 |            |          |      |     |                 |                 |
| 6     | V\$TATA_C  | 0.778981 | 6059 | (+) | NCTATAAAAR      | TAATTAAGAAG     |
| M0021 |            |          |      |     |                 |                 |
| 6     | V\$TATA_C  | 0.78611  | 6100 | (+) | NCTATAAAAR      | AACATATAAG      |
| M0025 |            |          |      |     |                 |                 |
| 2     | V\$TATA_01 | 0.805887 | 6101 | (+) | STATAAAWRNNNNNN | ACATATAAGAATCTA |
| M0021 |            |          |      |     |                 |                 |
| 6     | V\$TATA_C  | 0.751254 | 6102 | (+) | NCTATAAAAR      | CATATAAGAA      |
| M0025 |            |          |      |     |                 |                 |
| 2     | V\$TATA_01 | 0.854098 | 6103 | (+) | STATAAAWRNNNNNN | ATATAAGAATCTACG |
| M0021 |            |          |      |     |                 |                 |
| 6     | V\$TATA_C  | 0.78479  | 6241 | (+) | NCTATAAAAR      | TCTATATATT      |
| M0025 |            |          |      |     |                 |                 |
| 2     | V\$TATA_01 | 0.844456 | 6242 | (+) | STATAAAWRNNNNNN | CTATATATTTGGTAA |
| M0025 |            |          |      |     |                 |                 |
| 2     | V\$TATA_01 | 0.782035 | 6244 | (+) | STATAAAWRNNNNNN | ATATATTTGGTAATT |
| M0021 |            |          |      |     |                 |                 |
| 6     | V\$TATA_C  | 0.881172 | 6281 | (+) | NCTATAAAAR      | ATCATAAAAA      |
| M0021 |            |          |      |     |                 |                 |
| 6     | V\$TATA_C  | 0.760496 | 6282 | (+) | NCTATAAAAR      | TCATAAAAAA      |
| M0025 |            |          |      |     |                 |                 |
| 2     | V\$TATA_01 | 0.814514 | 6282 | (+) | STATAAAWRNNNNNN | TCATAAAAAATAAAG |
| M0021 |            |          |      |     |                 |                 |
| 6     | V\$TATA_C  | 0.756271 | 6355 | (+) | NCTATAAAAR      | GTTTAAATAA      |
| M0025 |            |          |      |     |                 |                 |
| 2     | V\$TATA_01 | 0.789901 | 6355 | (+) | STATAAAWRNNNNNN | GTTTAAATAAACTGT |
| M0021 |            |          |      |     |                 |                 |
| 6     | V\$TATA_C  | 0.769475 | 6408 | (+) | NCTATAAAAR      | ACTTTATCAA      |
| M0021 |            |          |      |     |                 |                 |
| 6     | V\$TATA_C  | 0.805123 | 6410 | (+) | NCTATAAAAR      | TTTATCAAAG      |
| M0021 |            |          |      |     |                 |                 |
| 6     | V\$TATA_C  | 0.748878 | 6461 | (+) | NCTATAAAAR      | ACTATTATAG      |
| M0025 |            |          |      |     |                 |                 |
| 2     | V\$TATA_01 | 0.799543 | 6462 | (+) | STATAAAWRNNNNNN | CTATTATAGCCAGGA |
| M0021 |            |          |      |     |                 |                 |
| 6     | V\$TATA_C  | 0.762873 | 6491 | (+) | NCTATAAAAR      | GCCAGATAAA      |
| M0025 |            |          |      |     |                 |                 |
| 2     | V\$TATA_01 | 0.777214 | 6505 | (+) | STATAAAWRNNNNNN | ACATTAGAGGGGAGA |
| M0021 |            |          |      |     |                 |                 |
| 6     | V\$TATA_C  | 0.743068 | 6525 | (+) | NCTATAAAAR      | TCATTTAAAT      |
| M0025 |            |          |      |     |                 |                 |
| 2     | V\$TATA_01 | 0.811469 | 6527 | (+) | STATAAAWRNNNNNN | ATTTAAATGATAATC |
| M0025 |            |          |      |     |                 |                 |
| 2     | V\$TATA_01 | 0.78305  | 6628 | (+) | STATAAAWRNNNNNN | ATTTATGAAGGTATA |
| M0021 |            |          |      |     |                 |                 |
| 6     | V\$TATA_C  | 0.822023 | 6637 | (+) | NCTATAAAAR      | GGTATAGAAA      |
| M0025 |            |          |      |     |                 |                 |
| 2     | V\$TATA_01 | 0.840142 | 6638 | (+) | STATAAAWRNNNNNN | GTATAGAAAGGACGC |
| M0025 |            |          |      |     |                 |                 |
| 2     | V\$TATA_01 | 0.880995 | 6732 | (+) | STATAAAWRNNNNNN | ACATAAATGGGCGGA |

|       |            |          |      |     |                 |                  |
|-------|------------|----------|------|-----|-----------------|------------------|
| M0021 |            |          |      |     |                 |                  |
| 6     | V\$TATA_C  | 0.817798 | 6846 | (+) | NCTATAAAAR      | TGTTTGAAAG       |
| M0021 |            |          |      |     |                 |                  |
| 6     | V\$TATA_C  | 0.740956 | 7126 | (+) | NCTATAAAAR      | GCTCTAACAA       |
| M0021 |            |          |      |     |                 |                  |
| 6     | V\$TATA_C  | 0.744653 | 7128 | (+) | NCTATAAAAR      | TCTAACAAAA       |
| M0021 |            |          |      |     |                 |                  |
| 6     | V\$TATA_C  | 0.793768 | 7149 | (+) | NCTATAAAAR      | TTTATTAAAA       |
| M0021 |            |          |      |     |                 |                  |
| 6     | V\$TATA_C  | 0.792184 | 7150 | (+) | NCTATAAAAR      | TTATTAAAAAT      |
| M0025 |            |          |      |     |                 |                  |
| 2     | V\$TATA_01 | 0.831515 | 7150 | (+) | STATAAAWRNNNNNN | TTATTAATAAAGA    |
| M0025 |            |          |      |     |                 |                  |
| 2     | V\$TATA_01 | 0.776199 | 7156 | (+) | STATAAAWRNNNNNN | AAATAAGAGTAAAA   |
| M0021 |            |          |      |     |                 |                  |
| 6     | V\$TATA_C  | 0.752575 | 7162 | (+) | NCTATAAAAR      | AGAGTAAAAA       |
| M0025 |            |          |      |     |                 |                  |
| 2     | V\$TATA_01 | 0.779498 | 7181 | (+) | STATAAAWRNNNNNN | GTATGAATGTTTAA   |
| M0021 |            |          |      |     |                 |                  |
| 6     | V\$TATA_C  | 0.911011 | 7188 | (+) | NCTATAAAAR      | TGTTTAAAAAT      |
| M0025 |            |          |      |     |                 |                  |
| 2     | V\$TATA_01 | 0.836336 | 7189 | (+) | STATAAAWRNNNNNN | GTTTAAATGAACATA  |
| M0021 |            |          |      |     |                 |                  |
| 6     | V\$TATA_C  | 0.833113 | 7200 | (+) | NCTATAAAAR      | ACTATAAGAC       |
| M0025 |            |          |      |     |                 |                  |
| 2     | V\$TATA_01 | 0.841411 | 7201 | (+) | STATAAAWRNNNNNN | CTATAAGACTCAAAG  |
| M0021 |            |          |      |     |                 |                  |
| 6     | V\$TATA_C  | 0.752839 | 7358 | (+) | NCTATAAAAR      | AATCTAAAAA       |
| M0021 |            |          |      |     |                 |                  |
| 6     | V\$TATA_C  | 0.744917 | 7359 | (+) | NCTATAAAAR      | ATCTAAAAAG       |
| M0025 |            |          |      |     |                 |                  |
| 2     | V\$TATA_01 | 0.794722 | 7359 | (+) | STATAAAWRNNNNNN | ATCTAAAAAGATGGG  |
| M0021 |            |          |      |     |                 |                  |
| 6     | V\$TATA_C  | 0.744653 | 7360 | (+) | NCTATAAAAR      | TCTAAAAAGA       |
| M0025 |            |          |      |     |                 |                  |
| 2     | V\$TATA_01 | 0.782796 | 7361 | (+) | STATAAAWRNNNNNN | CTAAAAAGATGGGGA  |
| M0021 |            |          |      |     |                 |                  |
| 6     | V\$TATA_C  | 0.80169  | 7387 | (+) | NCTATAAAAR      | GCCTCAAAAA       |
| M0021 |            |          |      |     |                 |                  |
| 6     | V\$TATA_C  | 0.740164 | 7435 | (+) | NCTATAAAAR      | TGCATATTAA       |
| M0021 |            |          |      |     |                 |                  |
| 6     | V\$TATA_C  | 0.751254 | 7437 | (+) | NCTATAAAAR      | CATATTAAAA       |
| M0021 |            |          |      |     |                 |                  |
| 6     | V\$TATA_C  | 0.785054 | 7438 | (+) | NCTATAAAAR      | ATATTAAAAAT      |
| M0025 |            |          |      |     |                 |                  |
| 2     | V\$TATA_01 | 0.853844 | 7438 | (+) | STATAAAWRNNNNNN | ATATTAAAAATCAATC |
| M0021 |            |          |      |     |                 |                  |
| 6     | V\$TATA_C  | 0.823607 | 7451 | (+) | NCTATAAAAR      | TCTTTTAAAT       |
| M0021 |            |          |      |     |                 |                  |
| 6     | V\$TATA_C  | 0.767626 | 7452 | (+) | NCTATAAAAR      | CTTTTAAATA       |
| M0025 |            |          |      |     |                 |                  |
| 2     | V\$TATA_01 | 0.804618 | 7453 | (+) | STATAAAWRNNNNNN | TTTTAAATATGTCCT  |
| M0025 |            |          |      |     |                 |                  |
| 2     | V\$TATA_01 | 0.825425 | 7494 | (+) | STATAAAWRNNNNNN | AAATATAACATCCG   |
| M0021 |            |          |      |     |                 |                  |
| 6     | V\$TATA_C  | 0.744653 | 7495 | (+) | NCTATAAAAR      | AATATAAACA       |
| M0025 |            |          |      |     |                 |                  |
| 2     | V\$TATA_01 | 0.827201 | 7496 | (+) | STATAAAWRNNNNNN | ATATAACATCCGTG   |
| M0021 |            |          |      |     |                 |                  |
| 6     | V\$TATA_C  | 0.806443 | 7549 | (+) | NCTATAAAAR      | TGTTTTAAAA       |
| M0021 |            |          |      |     |                 |                  |
| 6     | V\$TATA_C  | 0.878268 | 7550 | (+) | NCTATAAAAR      | GTTTTAAAAA       |
| M0025 |            |          |      |     |                 |                  |
| 2     | V\$TATA_01 | 0.791677 | 7550 | (+) | STATAAAWRNNNNNN | GTTTTAAAAAGCTAA  |
| M0021 |            |          |      |     |                 |                  |
| 6     | V\$TATA_C  | 0.779509 | 7551 | (+) | NCTATAAAAR      | TTTTAAAAAG       |



|       |            |          |      |     |                 |                 |
|-------|------------|----------|------|-----|-----------------|-----------------|
| M0025 |            |          |      |     |                 |                 |
| 2     | V\$TATA_01 | 0.844202 | 7551 | (+) | STATAAAWRNNNNNN | TTTTAAAAAGCTAAT |
| M0021 |            |          |      |     |                 |                 |
| 6     | V\$TATA_C  | 0.919461 | 7625 | (+) | NCTATAAAAR      | AGCATAAAAA      |
| M0021 |            |          |      |     |                 |                 |
| 6     | V\$TATA_C  | 0.759968 | 7626 | (+) | NCTATAAAAR      | GCATAAAAAG      |
| M0025 |            |          |      |     |                 |                 |
| 2     | V\$TATA_01 | 0.912966 | 7626 | (+) | STATAAAWRNNNNNN | GCATAAAAAGGGCCC |
| M0025 |            |          |      |     |                 |                 |
| 2     | V\$TATA_01 | 0.780005 | 7628 | (+) | STATAAAWRNNNNNN | ATAAAAAGGGCCCCA |
| M0021 |            |          |      |     |                 |                 |
| 6     | V\$TATA_C  | 0.759176 | 7723 | (+) | NCTATAAAAR      | ATCACAAAAA      |
| M0021 |            |          |      |     |                 |                 |
| 6     | V\$TATA_C  | 0.756271 | 7776 | (+) | NCTATAAAAR      | GTTTAAATAA      |
| M0025 |            |          |      |     |                 |                 |
| 2     | V\$TATA_01 | 0.78914  | 7776 | (+) | STATAAAWRNNNNNN | GTTTAAATAAAAAAT |
| M0021 |            |          |      |     |                 |                 |
| 6     | V\$TATA_C  | 0.835226 | 7779 | (+) | NCTATAAAAR      | TTAATAAAAA      |
| M0021 |            |          |      |     |                 |                 |
| 6     | V\$TATA_C  | 0.772379 | 7837 | (+) | NCTATAAAAR      | ATTTTAAATG      |
| M0025 |            |          |      |     |                 |                 |
| 2     | V\$TATA_01 | 0.797767 | 7838 | (+) | STATAAAWRNNNNNN | TTTTAAATGAAATTG |
| M0021 |            |          |      |     |                 |                 |
| 6     | V\$TATA_C  | 0.776076 | 7881 | (+) | NCTATAAAAR      | CCTTTATATA      |
| M0025 |            |          |      |     |                 |                 |
| 2     | V\$TATA_01 | 0.819081 | 7882 | (+) | STATAAAWRNNNNNN | CTTTATATACTACTT |
| M0025 |            |          |      |     |                 |                 |
| 2     | V\$TATA_01 | 0.772139 | 7897 | (+) | STATAAAWRNNNNNN | GTTTAAATTCTGAAC |
| M0021 |            |          |      |     |                 |                 |
| 6     | V\$TATA_C  | 0.831529 | 7928 | (+) | NCTATAAAAR      | GGTATGAAAG      |
| M0025 |            |          |      |     |                 |                 |
| 2     | V\$TATA_01 | 0.844456 | 7929 | (+) | STATAAAWRNNNNNN | GTATGAAAGTGTTGG |
| M0021 |            |          |      |     |                 |                 |
| 6     | V\$TATA_C  | 0.833905 | 7958 | (+) | NCTATAAAAR      | ACTTTTAAAA      |
| M0021 |            |          |      |     |                 |                 |
| 6     | V\$TATA_C  | 0.872194 | 7959 | (+) | NCTATAAAAR      | CTTTTAAAT       |
| M0025 |            |          |      |     |                 |                 |
| 2     | V\$TATA_01 | 0.804872 | 7959 | (+) | STATAAAWRNNNNNN | CTTTTAAATCACAG  |
| M0025 |            |          |      |     |                 |                 |
| 2     | V\$TATA_01 | 0.847754 | 7960 | (+) | STATAAAWRNNNNNN | TTTTAAATCACAGG  |
| M0025 |            |          |      |     |                 |                 |
| 2     | V\$TATA_01 | 0.792438 | 7998 | (+) | STATAAAWRNNNNNN | TTTTTTAAGCGAAAG |
| M0021 |            |          |      |     |                 |                 |
| 6     | V\$TATA_C  | 0.741748 | 8069 | (+) | NCTATAAAAR      | ATCAGAAAAT      |
| M0021 |            |          |      |     |                 |                 |
| 6     | V\$TATA_C  | 0.742012 | 8078 | (+) | NCTATAAAAR      | TGTTTATGAA      |
| M0025 |            |          |      |     |                 |                 |
| 2     | V\$TATA_01 | 0.775691 | 8079 | (+) | STATAAAWRNNNNNN | GTTTATGAAAGCTTA |
| M0021 |            |          |      |     |                 |                 |
| 6     | V\$TATA_C  | 0.805123 | 8080 | (+) | NCTATAAAAR      | TTTATGAAAG      |
| M0025 |            |          |      |     |                 |                 |
| 2     | V\$TATA_01 | 0.77493  | 8081 | (+) | STATAAAWRNNNNNN | TTATGAAAGCTTATT |
| M0025 |            |          |      |     |                 |                 |
| 2     | V\$TATA_01 | 0.78102  | 8178 | (+) | STATAAAWRNNNNNN | GGATATCAACCCAAC |
| M0021 |            |          |      |     |                 |                 |
| 6     | V\$TATA_C  | 0.832057 | 8196 | (+) | NCTATAAAAR      | TGTATGAAAA      |
| M0025 |            |          |      |     |                 |                 |
| 2     | V\$TATA_01 | 0.847501 | 8197 | (+) | STATAAAWRNNNNNN | GTATGAAAACAAATA |
| M0021 |            |          |      |     |                 |                 |
| 6     | V\$TATA_C  | 0.754423 | 8337 | (+) | NCTATAAAAR      | GTCATTAAAA      |
| M0021 |            |          |      |     |                 |                 |
| 6     | V\$TATA_C  | 0.882493 | 8338 | (+) | NCTATAAAAR      | TCATTAAAAA      |
| M0021 |            |          |      |     |                 |                 |
| 6     | V\$TATA_C  | 0.742012 | 8363 | (+) | NCTATAAAAR      | TGTTTCTAAA      |
| M0025 |            |          |      |     |                 |                 |
| 2     | V\$TATA_01 | 0.770363 | 8364 | (+) | STATAAAWRNNNNNN | GTTTCTAAACCAATG |

|       |            |          |      |     |                 |                  |
|-------|------------|----------|------|-----|-----------------|------------------|
| M0021 |            |          |      |     |                 |                  |
| 6     | V\$TATA_C  | 0.764457 | 8533 | (+) | NCTATAAAAR      | GTTACAAAAT       |
| M0021 |            |          |      |     |                 |                  |
| 6     | V\$TATA_C  | 0.759704 | 8538 | (+) | NCTATAAAAR      | AAAATAAAAC       |
| M0025 |            |          |      |     |                 |                  |
| 2     | V\$TATA_01 | 0.802081 | 8539 | (+) | STATAAAWRNNNNNN | AAATAAAACCAACTC  |
| M0021 |            |          |      |     |                 |                  |
| 6     | V\$TATA_C  | 0.805651 | 8577 | (+) | NCTATAAAAR      | TCAGTAAAAG       |
| M0021 |            |          |      |     |                 |                  |
| 6     | V\$TATA_C  | 0.807499 | 8664 | (+) | NCTATAAAAR      | AGTATAACAT       |
| M0025 |            |          |      |     |                 |                  |
| 2     | V\$TATA_01 | 0.8102   | 8665 | (+) | STATAAAWRNNNNNN | GTATAACATGCACCT  |
| M0021 |            |          |      |     |                 |                  |
| 6     | V\$TATA_C  | 0.753367 | 8827 | (+) | NCTATAAAAR      | TGTTTTTAAG       |
| M0025 |            |          |      |     |                 |                  |
| 2     | V\$TATA_01 | 0.802334 | 8828 | (+) | STATAAAWRNNNNNN | GTTTTTAAGGAAGTT  |
| M0025 |            |          |      |     |                 |                  |
| 2     | V\$TATA_01 | 0.810962 | 8866 | (+) | STATAAAWRNNNNNN | ATATATTTACCAAT   |
| M0021 |            |          |      |     |                 |                  |
| 6     | V\$TATA_C  | 0.823607 | 8878 | (+) | NCTATAAAAR      | AATTTAAAAAT      |
| M0025 |            |          |      |     |                 |                  |
| 2     | V\$TATA_01 | 0.782035 | 8884 | (+) | STATAAAWRNNNNNN | AAATATATTAGCATT  |
| M0021 |            |          |      |     |                 |                  |
| 6     | V\$TATA_C  | 0.752046 | 8908 | (+) | NCTATAAAAR      | ATGTTAAAAAT      |
| M0021 |            |          |      |     |                 |                  |
| 6     | V\$TATA_C  | 0.793768 | 9004 | (+) | NCTATAAAAR      | TTATTAAAAA       |
| M0021 |            |          |      |     |                 |                  |
| 6     | V\$TATA_C  | 0.820966 | 9005 | (+) | NCTATAAAAR      | TTATTAAAAAG      |
| M0025 |            |          |      |     |                 |                  |
| 2     | V\$TATA_01 | 0.778229 | 9005 | (+) | STATAAAWRNNNNNN | TTATTAAAAAGTTTAT |
| M0021 |            |          |      |     |                 |                  |
| 6     | V\$TATA_C  | 0.805123 | 9015 | (+) | NCTATAAAAR      | TTTATCAAAG       |
| M0025 |            |          |      |     |                 |                  |
| 2     | V\$TATA_01 | 0.79523  | 9016 | (+) | STATAAAWRNNNNNN | TTATCAAAGGCAAAG  |
| M0021 |            |          |      |     |                 |                  |
| 6     | V\$TATA_C  | 0.787167 | 9073 | (+) | NCTATAAAAR      | TCCTTAACAC       |
| M0021 |            |          |      |     |                 |                  |
| 6     | V\$TATA_C  | 0.752311 | 9140 | (+) | NCTATAAAAR      | CCTCTGAAAA       |
| M0021 |            |          |      |     |                 |                  |
| 6     | V\$TATA_C  | 0.750726 | 9164 | (+) | NCTATAAAAR      | TTTTTTAAAT       |
| M0021 |            |          |      |     |                 |                  |
| 6     | V\$TATA_C  | 0.741748 | 9165 | (+) | NCTATAAAAR      | TTTTTAAATC       |
| M0025 |            |          |      |     |                 |                  |
| 2     | V\$TATA_01 | 0.797006 | 9166 | (+) | STATAAAWRNNNNNN | TTTTAAATCTCAGGT  |
| M0025 |            |          |      |     |                 |                  |
| 2     | V\$TATA_01 | 0.816037 | 9179 | (+) | STATAAAWRNNNNNN | GTATTTAATTCATGC  |
| M0021 |            |          |      |     |                 |                  |
| 6     | V\$TATA_C  | 0.743068 | 9196 | (+) | NCTATAAAAR      | TCATTTAAAT       |
| M0025 |            |          |      |     |                 |                  |
| 2     | V\$TATA_01 | 0.802081 | 9198 | (+) | STATAAAWRNNNNNN | ATTTAAATATTGTGT  |
| M0021 |            |          |      |     |                 |                  |
| 6     | V\$TATA_C  | 0.755743 | 9244 | (+) | NCTATAAAAR      | GGTATTTAAA       |
| M0025 |            |          |      |     |                 |                  |
| 2     | V\$TATA_01 | 0.867039 | 9245 | (+) | STATAAAWRNNNNNN | GTATTTAAAGGGTAC  |
| M0025 |            |          |      |     |                 |                  |
| 2     | V\$TATA_01 | 0.791677 | 9247 | (+) | STATAAAWRNNNNNN | ATTTAAAGGGTACTC  |
| M0021 |            |          |      |     |                 |                  |
| 6     | V\$TATA_C  | 0.891207 | 9360 | (+) | NCTATAAAAR      | ATTATAAAAT       |
| M0025 |            |          |      |     |                 |                  |
| 2     | V\$TATA_01 | 0.872621 | 9361 | (+) | STATAAAWRNNNNNN | TTATAAAATGACAAT  |
| M0021 |            |          |      |     |                 |                  |
| 6     | V\$TATA_C  | 0.819118 | 9371 | (+) | NCTATAAAAR      | ACAATATAAT       |
| M0025 |            |          |      |     |                 |                  |
| 2     | V\$TATA_01 | 0.773915 | 9372 | (+) | STATAAAWRNNNNNN | CAATATAATAATAAA  |
| M0021 |            |          |      |     |                 |                  |
| 6     | V\$TATA_C  | 0.744653 | 9373 | (+) | NCTATAAAAR      | AATATAATAA       |

|       |            |          |       |     |                 |                  |
|-------|------------|----------|-------|-----|-----------------|------------------|
| M0025 |            |          |       |     |                 |                  |
| 2     | V\$TATA_01 | 0.801319 | 9374  | (+) | STATAAAWRNNNNNN | ATATAATAATAAATA  |
| M0025 |            |          |       |     |                 |                  |
| 2     | V\$TATA_01 | 0.803096 | 9386  | (+) | STATAAAWRNNNNNN | ATATTAAATGATGTA  |
| M0025 |            |          |       |     |                 |                  |
| 2     | V\$TATA_01 | 0.773408 | 9404  | (+) | STATAAAWRNNNNNN | CAATTAATGCAATCC  |
| M0025 |            |          |       |     |                 |                  |
| 2     | V\$TATA_01 | 0.771378 | 9580  | (+) | STATAAAWRNNNNNN | CCATAAGTAAAATTG  |
| M0021 |            |          |       |     |                 |                  |
| 6     | V\$TATA_C  | 0.743068 | 9603  | (+) | NCTATAAAAR      | TCATTAATAT       |
| M0021 |            |          |       |     |                 |                  |
| 6     | V\$TATA_C  | 0.761025 | 9670  | (+) | NCTATAAAAR      | ATTTTAAAAA       |
| M0021 |            |          |       |     |                 |                  |
| 6     | V\$TATA_C  | 0.890151 | 9671  | (+) | NCTATAAAAR      | TTTTTAAAAA       |
| M0021 |            |          |       |     |                 |                  |
| 6     | V\$TATA_C  | 0.768154 | 9672  | (+) | NCTATAAAAR      | TTTTAAAAAA       |
| M0025 |            |          |       |     |                 |                  |
| 2     | V\$TATA_01 | 0.798528 | 9672  | (+) | STATAAAWRNNNNNN | TTTTAAAAAATAATT  |
| M0021 |            |          |       |     |                 |                  |
| 6     | V\$TATA_C  | 0.77634  | 9673  | (+) | NCTATAAAAR      | TTTAAAAAAT       |
| M0025 |            |          |       |     |                 |                  |
| 2     | V\$TATA_01 | 0.785587 | 9709  | (+) | STATAAAWRNNNNNN | GTAGAAATAACATCA  |
| M0025 |            |          |       |     |                 |                  |
| 2     | V\$TATA_01 | 0.796752 | 9729  | (+) | STATAAAWRNNNNNN | AGATTAATAGCCCCCT |
| M0021 |            |          |       |     |                 |                  |
| 6     | V\$TATA_C  | 0.816477 | 9790  | (+) | NCTATAAAAR      | ACTTGAAAAT       |
| M0021 |            |          |       |     |                 |                  |
| 6     | V\$TATA_C  | 0.767098 | 9818  | (+) | NCTATAAAAR      | GGTATCTAAG       |
| M0025 |            |          |       |     |                 |                  |
| 2     | V\$TATA_01 | 0.806394 | 9819  | (+) | STATAAAWRNNNNNN | GTATCTAAGCAACCG  |
| M0025 |            |          |       |     |                 |                  |
| 2     | V\$TATA_01 | 0.774676 | 9874  | (+) | STATAAAWRNNNNNN | GAACAAATACAAACT  |
| M0021 |            |          |       |     |                 |                  |
| 6     | V\$TATA_C  | 0.800634 | 9908  | (+) | NCTATAAAAR      | TCATTATAAT       |
| M0021 |            |          |       |     |                 |                  |
| 6     | V\$TATA_C  | 0.786639 | 9910  | (+) | NCTATAAAAR      | ATTATAATAA       |
| M0025 |            |          |       |     |                 |                  |
| 2     | V\$TATA_01 | 0.790409 | 9911  | (+) | STATAAAWRNNNNNN | TTATAATAATACAAA  |
| M0025 |            |          |       |     |                 |                  |
| 2     | V\$TATA_01 | 0.773154 | 9919  | (+) | STATAAAWRNNNNNN | ATACAAAATTGTATT  |
| M0021 |            |          |       |     |                 |                  |
| 6     | V\$TATA_C  | 0.755743 | 9938  | (+) | NCTATAAAAR      | AGAATTAAAG       |
| M0021 |            |          |       |     |                 |                  |
| 6     | V\$TATA_C  | 0.772379 | 9955  | (+) | NCTATAAAAR      | ATTTTAAATG       |
| M0025 |            |          |       |     |                 |                  |
| 2     | V\$TATA_01 | 0.777721 | 9955  | (+) | STATAAAWRNNNNNN | ATTTTAAATGGGGTT  |
| M0025 |            |          |       |     |                 |                  |
| 2     | V\$TATA_01 | 0.829739 | 9956  | (+) | STATAAAWRNNNNNN | TTTTAAATGGGGTTT  |
| M0021 |            |          |       |     |                 |                  |
| 6     | V\$TATA_C  | 0.811724 | 9971  | (+) | NCTATAAAAR      | GCTTTTAAAT       |
| M0021 |            |          |       |     |                 |                  |
| 6     | V\$TATA_C  | 0.767626 | 9972  | (+) | NCTATAAAAR      | CTTTTAAATA       |
| M0025 |            |          |       |     |                 |                  |
| 2     | V\$TATA_01 | 0.784065 | 9973  | (+) | STATAAAWRNNNNNN | TTTTAAATATGTTTT  |
| M0021 |            |          |       |     |                 |                  |
| 6     | V\$TATA_C  | 0.751518 | 10019 | (+) | NCTATAAAAR      | TGAATAATAA       |
| M0025 |            |          |       |     |                 |                  |
| 2     | V\$TATA_01 | 0.858412 | 10083 | (+) | STATAAAWRNNNNNN | CTATTTATGCTGAGA  |
| M0021 |            |          |       |     |                 |                  |
| 6     | V\$TATA_C  | 0.961183 | 10257 | (+) | NCTATAAAAR      | TCCATAAAAA       |
| M0021 |            |          |       |     |                 |                  |
| 6     | V\$TATA_C  | 0.74254  | 10258 | (+) | NCTATAAAAR      | CCATAAAAAAT      |
| M0025 |            |          |       |     |                 |                  |
| 2     | V\$TATA_01 | 0.869576 | 10258 | (+) | STATAAAWRNNNNNN | CCATAAAAAATGCTTG |
| M0021 |            |          |       |     |                 |                  |
| 6     | V\$TATA_C  | 0.777132 | 10273 | (+) | NCTATAAAAR      | CTCATGAAAG       |

|       |             |          |       |     |                       |                       |
|-------|-------------|----------|-------|-----|-----------------------|-----------------------|
| M0025 |             |          |       |     |                       |                       |
| 2     | V\$TATA_01  | 0.777468 | 10274 | (+) | STATAAAWRNNNNNN       | TCATGAAAGCACAGA       |
| M0021 |             |          |       |     |                       |                       |
| 6     | V\$TATA_C   | 0.762873 | 10292 | (+) | NCTATAAAAR            | GCCAAATAAA            |
| M0021 |             |          |       |     |                       |                       |
| 6     | V\$TATA_C   | 0.78611  | 10305 | (+) | NCTATAAAAR            | TCCATTTAAG            |
| M0025 |             |          |       |     |                       |                       |
| 2     | V\$TATA_01  | 0.819589 | 10306 | (+) | STATAAAWRNNNNNN       | CCATTTAAGGAAACT       |
| M0021 |             |          |       |     |                       |                       |
| 6     | V\$TATA_C   | 0.752839 | 10327 | (+) | NCTATAAAAR            | TCTGAAAAA             |
| M0021 |             |          |       |     |                       |                       |
| 6     | V\$TATA_C   | 0.752839 | 10378 | (+) | NCTATAAAAR            | TCTCTAAGAA            |
| M0021 |             |          |       |     |                       |                       |
| 6     | V\$TATA_C   | 0.756007 | 10380 | (+) | NCTATAAAAR            | TCTAAGAAAG            |
| M0021 |             |          |       |     |                       |                       |
| 6     | V\$TATA_C   | 0.814629 | 10433 | (+) | NCTATAAAAR            | TGTATGAAAT            |
| M0025 |             |          |       |     |                       |                       |
| 2     | V\$TATA_01  | 0.820096 | 10434 | (+) | STATAAAWRNNNNNN       | GTATGAAATGGAAAT       |
| M0021 |             |          |       |     |                       |                       |
| 6     | V\$TATA_C   | 0.890151 | 10536 | (+) | NCTATAAAAR            | CCAATAAAAT            |
| M0025 |             |          |       |     |                       |                       |
| 2     | V\$TATA_01  | 0.774423 | 10537 | (+) | STATAAAWRNNNNNN       | CAATAAAATGTTTCAT      |
| M0025 |             |          |       |     |                       |                       |
| 2     | V\$TATA_01  | 0.773662 | 10706 | (+) | STATAAAWRNNNNNN       | GTATCAATTAGCACA       |
| M0021 |             |          |       |     |                       |                       |
| 6     | V\$TATA_C   | 0.757064 | 10754 | (+) | NCTATAAAAR            | ACTGTAATAG            |
| M0021 |             |          |       |     |                       |                       |
| 6     | V\$TATA_C   | 0.747821 | 10807 | (+) | NCTATAAAAR            | GCAATTAAAC            |
| M0025 |             |          |       |     |                       |                       |
| 2     | V\$TATA_01  | 0.77696  | 10887 | (+) | STATAAAWRNNNNNN       | CTATGTGTAGGAAGA       |
| M0021 |             |          |       |     |                       |                       |
| 6     | V\$TATA_C   | 0.789015 | 10969 | (+) | NCTATAAAAR            | TGTTTAAAGT            |
| M0025 |             |          |       |     |                       |                       |
| 2     | V\$TATA_01  | 0.855113 | 10970 | (+) | STATAAAWRNNNNNN       | GTTTAAAGTCCAAGG       |
| M0025 |             |          |       |     |                       |                       |
| 2     | V\$TATA_01  | 0.818828 | 10987 | (+) | STATAAAWRNNNNNN       | ATTTAAATATATCTG       |
| M0025 |             |          |       |     |                       |                       |
| 2     | V\$TATA_01  | 0.775184 | 10991 | (+) | STATAAAWRNNNNNN       | AAATATATCTGTACT       |
| M0021 |             |          |       |     |                       |                       |
| 6     | V\$TATA_C   | 0.762873 | 11178 | (+) | NCTATAAAAR            | TGAATGAAAG            |
| M0022 |             |          |       |     |                       |                       |
| 3     | V\$STAT_01  | 0.846483 | 208   | (-) | TTCCCRKAA             | TTAGGTGAA             |
| M0022 |             |          |       |     |                       |                       |
| 3     | V\$STAT_01  | 0.815478 | 271   | (+) | TTCCCRKAA             | TTCTCATAG             |
| M0022 |             |          |       |     |                       |                       |
| 3     | V\$STAT_01  | 0.826821 | 300   | (-) | TTCCCRKAA             | TTTCAGTAA             |
| M0022 |             |          |       |     |                       |                       |
| 3     | V\$STAT_01  | 0.796068 | 410   | (+) | TTCCCRKAA             | TTCTGGTAG             |
| M0022 |             |          |       |     |                       |                       |
| 3     | V\$STAT_01  | 0.822536 | 410   | (-) | TTCCCRKAA             | TTCTGGTAG             |
| M0022 |             |          |       |     |                       |                       |
| 3     | V\$STAT_01  | 0.8606   | 711   | (+) | TTCCCRKAA             | TTTCTGGAA             |
| M0022 |             |          |       |     |                       |                       |
| 3     | V\$STAT_01  | 0.792034 | 711   | (-) | TTCCCRKAA             | TTTCTGGAA             |
| M0022 |             |          |       |     |                       |                       |
| 3     | V\$STAT_01  | 0.81699  | 712   | (+) | TTCCCRKAA             | TTCTGGAAA             |
| M0022 |             |          |       |     |                       |                       |
| 3     | V\$STAT_01  | 0.870179 | 712   | (-) | TTCCCRKAA             | TTCTGGAAA             |
| M0022 |             |          |       |     |                       |                       |
| 3     | V\$STAT_01  | 0.905218 | 759   | (+) | TTCCCRKAA             | TTCTTATAA             |
| M0022 |             |          |       |     |                       |                       |
| 5     | V\$STAT3_01 | 0.724258 | 845   | (-) | NGNNATTTCCSGGAARTGNNN | AGTCATGTCATGGATATACCA |
| M0022 |             |          |       |     |                       |                       |
| 3     | V\$STAT_01  | 0.8606   | 911   | (+) | TTCCCRKAA             | TTCATGGAA             |
| M0022 |             |          |       |     |                       |                       |
| 3     | V\$STAT_01  | 0.792034 | 911   | (-) | TTCCCRKAA             | TTCATGGAA             |

|       |             |          |      |     |                       |                       |
|-------|-------------|----------|------|-----|-----------------------|-----------------------|
| M0022 |             |          |      |     |                       |                       |
| 3     | V\$STAT_01  | 0.817746 | 1088 | (-) | TTCCCRKAA             | TAAGAGGAA             |
| M0022 |             |          |      |     |                       |                       |
| 3     | V\$STAT_01  | 0.799849 | 1164 | (+) | TTCCCRKAA             | TTCTGACAA             |
| M0022 |             |          |      |     |                       |                       |
| 3     | V\$STAT_01  | 0.826317 | 1164 | (-) | TTCCCRKAA             | TTCTGACAA             |
| M0022 |             |          |      |     |                       |                       |
| 3     | V\$STAT_01  | 0.861356 | 1362 | (+) | TTCCCRKAA             | TTATTATAA             |
| M0022 |             |          |      |     |                       |                       |
| 3     | V\$STAT_01  | 0.818503 | 1381 | (-) | TTCCCRKAA             | TGTTGGGAA             |
| M0022 |             |          |      |     |                       |                       |
| 3     | V\$STAT_01  | 0.799597 | 1424 | (+) | TTCCCRKAA             | TTATTATCA             |
| M0022 |             |          |      |     |                       |                       |
| 3     | V\$STAT_01  | 0.8243   | 1603 | (-) | TTCCCRKAA             | TACTGAGAA             |
| M0022 |             |          |      |     |                       |                       |
| 3     | V\$STAT_01  | 0.791782 | 1838 | (-) | TTCCCRKAA             | TGACATGAA             |
| M0022 |             |          |      |     |                       |                       |
| 4     | V\$STAT1_01 | 0.722542 | 1846 | (-) | NNNSANTTCCGGGAANTGNSN | AGCTCTTTCCTGCATCCGTT  |
| M0022 |             |          |      |     |                       |                       |
| 3     | V\$STAT_01  | 0.835644 | 1852 | (+) | TTCCCRKAA             | TTCCCTGCA             |
| M0022 |             |          |      |     |                       |                       |
| 3     | V\$STAT_01  | 0.8364   | 2108 | (+) | TTCCCRKAA             | TTCTCAAAA             |
| M0022 |             |          |      |     |                       |                       |
| 3     | V\$STAT_01  | 0.8606   | 2220 | (-) | TTCCCRKAA             | TGACAAGAA             |
| M0022 |             |          |      |     |                       |                       |
| 3     | V\$STAT_01  | 0.826569 | 2234 | (+) | TTCCCRKAA             | TTCAGATAA             |
| M0022 |             |          |      |     |                       |                       |
| 3     | V\$STAT_01  | 0.80968  | 2234 | (-) | TTCCCRKAA             | TTCAGATAA             |
| M0022 |             |          |      |     |                       |                       |
| 3     | V\$STAT_01  | 0.8606   | 2439 | (-) | TTCCCRKAA             | TGACAGTAA             |
| M0022 |             |          |      |     |                       |                       |
| 3     | V\$STAT_01  | 0.80968  | 2449 | (-) | TTCCCRKAA             | TTACAAAAA             |
| M0022 |             |          |      |     |                       |                       |
| 3     | V\$STAT_01  | 0.802622 | 2707 | (-) | TTCCCRKAA             | TTAGGAAAA             |
| M0022 |             |          |      |     |                       |                       |
| 3     | V\$STAT_01  | 0.866398 | 2956 | (+) | TTCCCRKAA             | CTCCCAGAA             |
| M0022 |             |          |      |     |                       |                       |
| 3     | V\$STAT_01  | 0.803126 | 2956 | (-) | TTCCCRKAA             | CTCCCAGAA             |
| M0022 |             |          |      |     |                       |                       |
| 5     | V\$STAT3_01 | 0.723968 | 3115 | (+) | NGNNATTTCCSGGAARTGNNN | TTGTTTTTCACAGAAATATCC |
| M0022 |             |          |      |     |                       |                       |
| 5     | V\$STAT3_01 | 0.735409 | 3115 | (-) | NGNNATTTCCSGGAARTGNNN | TTGTTTTTCACAGAAATATCC |
| M0022 |             |          |      |     |                       |                       |
| 3     | V\$STAT_01  | 0.870179 | 3121 | (+) | TTCCCRKAA             | TTCACAGAA             |
| M0022 |             |          |      |     |                       |                       |
| 3     | V\$STAT_01  | 0.81699  | 3121 | (-) | TTCCCRKAA             | TTCACAGAA             |
| M0022 |             |          |      |     |                       |                       |
| 3     | V\$STAT_01  | 0.866398 | 3143 | (+) | TTCCCRKAA             | TACCCAGAA             |
| M0022 |             |          |      |     |                       |                       |
| 3     | V\$STAT_01  | 0.80489  | 3143 | (-) | TTCCCRKAA             | TACCCAGAA             |
| M0022 |             |          |      |     |                       |                       |
| 3     | V\$STAT_01  | 0.902445 | 3180 | (+) | TTCCCRKAA             | TTCTGAGAA             |
| M0022 |             |          |      |     |                       |                       |
| 3     | V\$STAT_01  | 0.938997 | 3180 | (-) | TTCCCRKAA             | TTCTGAGAA             |
| M0022 |             |          |      |     |                       |                       |
| 3     | V\$STAT_01  | 0.795815 | 3344 | (+) | TTCCCRKAA             | ATCTTAGAA             |
| M0022 |             |          |      |     |                       |                       |
| 3     | V\$STAT_01  | 0.815982 | 3565 | (+) | TTCCCRKAA             | GTCTCTTAA             |
| M0022 |             |          |      |     |                       |                       |
| 3     | V\$STAT_01  | 0.796068 | 3837 | (+) | TTCCCRKAA             | GTCTGGTAA             |
| M0022 |             |          |      |     |                       |                       |
| 3     | V\$STAT_01  | 0.822536 | 3837 | (-) | TTCCCRKAA             | GTCTGGTAA             |
| M0022 |             |          |      |     |                       |                       |
| 3     | V\$STAT_01  | 0.839677 | 3889 | (+) | TTCCCRKAA             | ATCCTAGAA             |
| M0022 |             |          |      |     |                       |                       |
| 3     | V\$STAT_01  | 0.846483 | 3917 | (+) | TTCCCRKAA             | TTACACCTAA            |

|       |             |          |      |     |                       |                       |
|-------|-------------|----------|------|-----|-----------------------|-----------------------|
| M0022 |             |          |      |     |                       |                       |
| 3     | V\$STAT_01  | 0.792538 | 4004 | (+) | TTCCCRKAA             | TTTTTATAA             |
| M0022 |             |          |      |     |                       |                       |
| 3     | V\$STAT_01  | 0.849761 | 4028 | (-) | TTCCCRKAA             | CTACAGGAA             |
| M0022 |             |          |      |     |                       |                       |
| 3     | V\$STAT_01  | 0.888581 | 4091 | (+) | TTCCCRKAA             | TTCTTCTAA             |
| M0022 |             |          |      |     |                       |                       |
| 3     | V\$STAT_01  | 0.826821 | 4113 | (+) | TTCCCRKAA             | TTCTTGAAA             |
| M0022 |             |          |      |     |                       |                       |
| 3     | V\$STAT_01  | 0.81573  | 4190 | (+) | TTCCCRKAA             | TTCCAAGCA             |
| M0022 |             |          |      |     |                       |                       |
| 3     | V\$STAT_01  | 0.812957 | 4190 | (-) | TTCCCRKAA             | TTCCAAGCA             |
| M0022 |             |          |      |     |                       |                       |
| 3     | V\$STAT_01  | 0.819259 | 4487 | (+) | TTCCCRKAA             | TTAACATAA             |
| M0022 |             |          |      |     |                       |                       |
| 3     | V\$STAT_01  | 0.812957 | 4598 | (-) | TTCCCRKAA             | CTCCAGTAA             |
| M0022 |             |          |      |     |                       |                       |
| 4     | V\$STAT1_01 | 0.737362 | 4635 | (-) | NNNSANTTCCGGAANTGNSN  | TGCCTTTTTATGGAAATAAAC |
| M0022 |             |          |      |     |                       |                       |
| 5     | V\$STAT3_01 | 0.710934 | 4635 | (-) | NGNNATTTCCSGGAARTGNNN | TGCCTTTTTATGGAAATAAAC |
| M0022 |             |          |      |     |                       |                       |
| 3     | V\$STAT_01  | 0.863121 | 4642 | (-) | TTCCCRKAA             | TTATGGAAA             |
| M0022 |             |          |      |     |                       |                       |
| 3     | V\$STAT_01  | 0.815478 | 4913 | (+) | TTCCCRKAA             | TTCTCATAG             |
| M0022 |             |          |      |     |                       |                       |
| 3     | V\$STAT_01  | 0.800605 | 4977 | (-) | TTCCCRKAA             | TAAGGAGAA             |
| M0022 |             |          |      |     |                       |                       |
| 3     | V\$STAT_01  | 0.822536 | 5099 | (-) | TTCCCRKAA             | TTCTGAGAG             |
| M0022 |             |          |      |     |                       |                       |
| 3     | V\$STAT_01  | 0.802622 | 5145 | (-) | TTCCCRKAA             | TTAAGATAA             |
| M0022 |             |          |      |     |                       |                       |
| 4     | V\$STAT1_01 | 0.753334 | 5227 | (-) | NNNSANTTCCGGAANTGNSN  | TTATACTTCCCATAAACTTTC |
| M0022 |             |          |      |     |                       |                       |
| 5     | V\$STAT3_01 | 0.720782 | 5227 | (+) | NGNNATTTCCSGGAARTGNNN | TTATACTTCCCATAAACTTTC |
| M0022 |             |          |      |     |                       |                       |
| 3     | V\$STAT_01  | 0.9758   | 5233 | (+) | TTCCCRKAA             | TTCCCATAA             |
| M0022 |             |          |      |     |                       |                       |
| 3     | V\$STAT_01  | 0.875725 | 5233 | (-) | TTCCCRKAA             | TTCCCATAA             |
| M0022 |             |          |      |     |                       |                       |
| 3     | V\$STAT_01  | 0.8243   | 5266 | (-) | TTCCCRKAA             | TACTGAGAA             |
| M0022 |             |          |      |     |                       |                       |
| 3     | V\$STAT_01  | 0.795815 | 5449 | (-) | TTCCCRKAA             | CTCTAAGAA             |
| M0022 |             |          |      |     |                       |                       |
| 3     | V\$STAT_01  | 0.826821 | 5486 | (+) | TTCCCRKAA             | TTCTTGAAA             |
| M0022 |             |          |      |     |                       |                       |
| 3     | V\$STAT_01  | 0.841442 | 5648 | (-) | TTCCCRKAA             | TACTAGGAA             |
| M0022 |             |          |      |     |                       |                       |
| 5     | V\$STAT3_01 | 0.789283 | 5717 | (-) | NGNNATTTCCSGGAARTGNNN | AAACATTTCTTTAAATACCC  |
| M0022 |             |          |      |     |                       |                       |
| 3     | V\$STAT_01  | 0.863625 | 5723 | (+) | TTCCCRKAA             | TTCTTTTAA             |
| M0022 |             |          |      |     |                       |                       |
| 3     | V\$STAT_01  | 0.826821 | 5793 | (-) | TTCCCRKAA             | TTCAAAGAA             |
| M0022 |             |          |      |     |                       |                       |
| 3     | V\$STAT_01  | 0.792538 | 6004 | (+) | TTCCCRKAA             | TTAATATAA             |
| M0022 |             |          |      |     |                       |                       |
| 3     | V\$STAT_01  | 0.819763 | 6062 | (-) | TTCCCRKAA             | TTAAAAGAA             |
| M0022 |             |          |      |     |                       |                       |
| 3     | V\$STAT_01  | 0.792538 | 6093 | (+) | TTCCCRKAA             | TTATCACAA             |
| M0022 |             |          |      |     |                       |                       |
| 3     | V\$STAT_01  | 0.888077 | 6279 | (+) | TTCCCRKAA             | TTATCATAA             |
| M0022 |             |          |      |     |                       |                       |
| 3     | V\$STAT_01  | 0.851525 | 6279 | (-) | TTCCCRKAA             | TTATCATAA             |
| M0022 |             |          |      |     |                       |                       |
| 3     | V\$STAT_01  | 0.8243   | 6313 | (+) | TTCCCRKAA             | TTCTCAGGA             |
| M0022 |             |          |      |     |                       |                       |
| 3     | V\$STAT_01  | 0.795059 | 6469 | (-) | TTCCCRKAA             | AGCCAGGAA             |

|       |             |          |      |     |                       |                       |
|-------|-------------|----------|------|-----|-----------------------|-----------------------|
| M0022 |             |          |      |     |                       |                       |
| 3     | V\$STAT_01  | 0.79758  | 6715 | (+) | TTCCCRKAA             | TTACTAGTA             |
| M0022 |             |          |      |     |                       |                       |
| 4     | V\$STAT1_01 | 0.735057 | 6774 | (-) | NNNSANTTCCGGAANTGNSN  | GGTCCTTTCCCTGATTTTCAT |
| M0022 |             |          |      |     |                       |                       |
| 5     | V\$STAT3_01 | 0.718465 | 6774 | (+) | NGNNATTTCCSGGAARTGNNN | GGTCCTTTCCCTGATTTTCAT |
| M0022 |             |          |      |     |                       |                       |
| 5     | V\$STAT3_01 | 0.721651 | 6774 | (-) | NGNNATTTCCSGGAARTGNNN | GGTCCTTTCCCTGATTTTCAT |
| M0022 |             |          |      |     |                       |                       |
| 3     | V\$STAT_01  | 0.878498 | 6894 | (+) | TTCCCRKAA             | TTATTGTAA             |
| M0022 |             |          |      |     |                       |                       |
| 3     | V\$STAT_01  | 0.826569 | 6894 | (-) | TTCCCRKAA             | TTATTGTAA             |
| M0022 |             |          |      |     |                       |                       |
| 5     | V\$STAT3_01 | 0.728892 | 6969 | (+) | NGNNATTTCCSGGAARTGNNN | TCCTGCTTCCAGGACACCTGT |
| M0022 |             |          |      |     |                       |                       |
| 5     | V\$STAT3_01 | 0.722375 | 6969 | (-) | NGNNATTTCCSGGAARTGNNN | TCCTGCTTCCAGGACACCTGT |
| M0022 |             |          |      |     |                       |                       |
| 3     | V\$STAT_01  | 0.856819 | 6975 | (-) | TTCCCRKAA             | TTCCAGGAC             |
| M0022 |             |          |      |     |                       |                       |
| 3     | V\$STAT_01  | 0.843459 | 7008 | (+) | TTCCCRKAA             | TTCTTATCA             |
| M0022 |             |          |      |     |                       |                       |
| 3     | V\$STAT_01  | 0.808924 | 7080 | (+) | TTCCCRKAA             | TTCTGCCA              |
| M0022 |             |          |      |     |                       | CGTGACTTAGGGGAAA-     |
| 4     | V\$STAT1_01 | 0.774741 | 7507 | (+) | NNNSANTTCCGGAANTGNSN  | GAAAA                 |
| M0022 |             |          |      |     |                       | CGTGACTTAGGGGAAA-     |
| 4     | V\$STAT1_01 | 0.743455 | 7507 | (-) | NNNSANTTCCGGAANTGNSN  | GAAAA                 |
| M0022 |             |          |      |     |                       | CGTGACTTAGGGGAAA-     |
| 5     | V\$STAT3_01 | 0.724403 | 7507 | (+) | NGNNATTTCCSGGAARTGNNN | GAAAA                 |
| M0022 |             |          |      |     |                       | CGTGACTTAGGGGAAA-     |
| 5     | V\$STAT3_01 | 0.751195 | 7507 | (-) | NGNNATTTCCSGGAARTGNNN | GAAAA                 |
| M0022 |             |          |      |     |                       |                       |
| 3     | V\$STAT_01  | 0.806907 | 7513 | (+) | TTCCCRKAA             | TTAGGGGAA             |
| M0022 |             |          |      |     |                       |                       |
| 3     | V\$STAT_01  | 0.959163 | 7513 | (-) | TTCCCRKAA             | TTAGGGGAA             |
| M0022 |             |          |      |     |                       |                       |
| 3     | V\$STAT_01  | 0.81573  | 7620 | (+) | TTCCCRKAA             | TTCCAAGCA             |
| M0022 |             |          |      |     |                       |                       |
| 3     | V\$STAT_01  | 0.812957 | 7620 | (-) | TTCCCRKAA             | TTCCAAGCA             |
| M0022 |             |          |      |     |                       | CTGGGGTTCTGGGAA-      |
| 4     | V\$STAT1_01 | 0.75284  | 7669 | (+) | NNNSANTTCCGGAANTGNSN  | GCCCAG                |
| M0022 |             |          |      |     |                       | CTGGGGTTCTGGGAA-      |
| 4     | V\$STAT1_01 | 0.73835  | 7669 | (-) | NNNSANTTCCGGAANTGNSN  | GCCCAG                |
| M0022 |             |          |      |     |                       | CTGGGGTTCTGGGAA-      |
| 5     | V\$STAT3_01 | 0.746271 | 7669 | (+) | NGNNATTTCCSGGAARTGNNN | GCCCAG                |
| M0022 |             |          |      |     |                       | CTGGGGTTCTGGGAA-      |
| 5     | V\$STAT3_01 | 0.725127 | 7669 | (-) | NGNNATTTCCSGGAARTGNNN | GCCCAG                |
| M0022 |             |          |      |     |                       |                       |
| 3     | V\$STAT_01  | 0.919587 | 7675 | (+) | TTCCCRKAA             | TTCTGGGAA             |
| M0022 |             |          |      |     |                       |                       |
| 3     | V\$STAT_01  | 0.982859 | 7675 | (-) | TTCCCRKAA             | TTCTGGGAA             |
| M0022 |             |          |      |     |                       |                       |
| 3     | V\$STAT_01  | 0.792538 | 7721 | (+) | TTCCCRKAA             | TTATCACAA             |
| M0022 |             |          |      |     |                       |                       |
| 3     | V\$STAT_01  | 0.795815 | 7750 | (-) | TTCCCRKAA             | TTCTAGTCA             |
| M0022 |             |          |      |     |                       |                       |
| 3     | V\$STAT_01  | 0.802622 | 8289 | (+) | TTCCCRKAA             | TTTCTCTAA             |
| M0022 |             |          |      |     |                       |                       |
| 4     | V\$STAT1_01 | 0.726    | 8303 | (-) | NNNSANTTCCGGAANTGNSN  | TTGCCCTTCCCAGATTTTGAT |
| M0022 |             |          |      |     |                       |                       |
| 3     | V\$STAT_01  | 0.866398 | 8309 | (+) | TTCCCRKAA             | TTCCCAGAT             |
| M0022 |             |          |      |     |                       |                       |
| 3     | V\$STAT_01  | 0.803126 | 8309 | (-) | TTCCCRKAA             | TTCCCAGAT             |
| M0022 |             |          |      |     |                       |                       |
| 3     | V\$STAT_01  | 0.843711 | 8348 | (+) | TTCCCRKAA             | TTACAGTAA             |
| M0022 |             |          |      |     |                       |                       |
| 3     | V\$STAT_01  | 0.922359 | 8348 | (-) | TTCCCRKAA             | TTACAGTAA             |

|       |             |          |       |     |                       |                       |
|-------|-------------|----------|-------|-----|-----------------------|-----------------------|
| M0022 |             |          |       |     |                       |                       |
| 3     | V\$STAT_01  | 0.802622 | 8454  | (+) | TTCCCRKAA             | TTAACCTAA             |
| M0022 |             |          |       |     |                       |                       |
| 3     | V\$STAT_01  | 0.863625 | 8500  | (+) | TTCCCRKAA             | TTCTTTAA              |
| M0022 |             |          |       |     |                       |                       |
| 3     | V\$STAT_01  | 0.819763 | 8511  | (-) | TTCCCRKAA             | TTGGGAGAA             |
| M0022 |             |          |       |     |                       |                       |
| 4     | V\$STAT1_01 | 0.816565 | 8561  | (+) | NNNSANTTCCGGAANTGNSN  | TGGAGTTTCTGGGAATTCAGT |
| M0022 |             |          |       |     |                       |                       |
| 4     | V\$STAT1_01 | 0.737362 | 8561  | (-) | NNNSANTTCCGGAANTGNSN  | TGGAGTTTCTGGGAATTCAGT |
| M0022 |             |          |       |     |                       |                       |
| 5     | V\$STAT3_01 | 0.825199 | 8561  | (+) | NGNNATTTCCSGGAARTGNNN | TGGAGTTTCTGGGAATTCAGT |
| M0022 |             |          |       |     |                       |                       |
| 5     | V\$STAT3_01 | 0.777987 | 8561  | (-) | NGNNATTTCCSGGAARTGNNN | TGGAGTTTCTGGGAATTCAGT |
| M0022 |             |          |       |     |                       |                       |
| 3     | V\$STAT_01  | 0.919587 | 8567  | (+) | TTCCCRKAA             | TTCTGGGAA             |
| M0022 |             |          |       |     |                       |                       |
| 3     | V\$STAT_01  | 0.982859 | 8567  | (-) | TTCCCRKAA             | TTCTGGGAA             |
| M0022 |             |          |       |     |                       |                       |
| 3     | V\$STAT_01  | 0.805899 | 8734  | (-) | TTCCCRKAA             | TTACAGTTA             |
| M0022 |             |          |       |     |                       |                       |
| 4     | V\$STAT1_01 | 0.746583 | 8770  | (+) | NNNSANTTCCGGAANTGNSN  | GTATTCTTACCTGAAATGTAA |
| M0022 |             |          |       |     |                       |                       |
| 4     | V\$STAT1_01 | 0.730611 | 8770  | (-) | NNNSANTTCCGGAANTGNSN  | GTATTCTTACCTGAAATGTAA |
| M0022 |             |          |       |     |                       |                       |
| 5     | V\$STAT3_01 | 0.740478 | 8770  | (-) | NGNNATTTCCSGGAARTGNNN | GTATTCTTACCTGAAATGTAA |
| M0022 |             |          |       |     |                       |                       |
| 3     | V\$STAT_01  | 0.853542 | 8776  | (+) | TTCCCRKAA             | TTACCTGAA             |
| M0022 |             |          |       |     |                       |                       |
| 3     | V\$STAT_01  | 0.843711 | 8776  | (-) | TTCCCRKAA             | TTACCTGAA             |
| M0022 |             |          |       |     |                       |                       |
| 3     | V\$STAT_01  | 0.812957 | 8845  | (-) | TTCCCRKAA             | TTCCAGTAC             |
| M0022 |             |          |       |     |                       |                       |
| 3     | V\$STAT_01  | 0.826317 | 8948  | (+) | TTCCCRKAA             | TTAGCAGAA             |
| M0022 |             |          |       |     |                       |                       |
| 3     | V\$STAT_01  | 0.87875  | 8948  | (-) | TTCCCRKAA             | TTAGCAGAA             |
| M0022 |             |          |       |     |                       |                       |
| 3     | V\$STAT_01  | 0.796068 | 8992  | (+) | TTCCCRKAA             | ATCTGGTAA             |
| M0022 |             |          |       |     |                       |                       |
| 3     | V\$STAT_01  | 0.822536 | 8992  | (-) | TTCCCRKAA             | ATCTGGTAA             |
| M0022 |             |          |       |     |                       |                       |
| 3     | V\$STAT_01  | 0.826821 | 9042  | (-) | TTCCCRKAA             | TGAGAAGAA             |
| M0022 |             |          |       |     |                       |                       |
| 3     | V\$STAT_01  | 0.790522 | 9098  | (-) | TTCCCRKAA             | TCATAGTAA             |
| M0022 |             |          |       |     |                       |                       |
| 3     | V\$STAT_01  | 0.853542 | 9338  | (+) | TTCCCRKAA             | TTGCTGTAA             |
| M0022 |             |          |       |     |                       |                       |
| 3     | V\$STAT_01  | 0.819763 | 9483  | (+) | TTCCCRKAA             | TTCATCTAA             |
| M0022 |             |          |       |     |                       |                       |
| 3     | V\$STAT_01  | 0.805899 | 9619  | (+) | TTCCCRKAA             | TCACTGTAA             |
| M0022 |             |          |       |     |                       |                       |
| 3     | V\$STAT_01  | 0.807663 | 9640  | (-) | TTCCCRKAA             | TAACAGTAA             |
| M0022 |             |          |       |     |                       |                       |
| 3     | V\$STAT_01  | 0.8243   | 9754  | (-) | TTCCCRKAA             | TCCTGAGAA             |
| M0022 |             |          |       |     |                       |                       |
| 3     | V\$STAT_01  | 0.826821 | 9788  | (+) | TTCCCRKAA             | TTACTTGAA             |
| M0022 |             |          |       |     |                       |                       |
| 3     | V\$STAT_01  | 0.804638 | 9799  | (-) | TTCCCRKAA             | TGCTGGGAT             |
| M0022 |             |          |       |     |                       |                       |
| 3     | V\$STAT_01  | 0.861356 | 9911  | (-) | TTCCCRKAA             | TTATAATAA             |
| M0022 |             |          |       |     |                       |                       |
| 3     | V\$STAT_01  | 0.826821 | 9987  | (-) | TTCCCRKAA             | TTTCAAGAA             |
| M0022 |             |          |       |     |                       |                       |
| 3     | V\$STAT_01  | 0.8606   | 10061 | (+) | TTCCCRKAA             | TTACTGTCA             |
| M0022 |             |          |       |     |                       |                       |
| 3     | V\$STAT_01  | 0.819763 | 10142 | (+) | TTCCCRKAA             | TTACTTTAA             |



|                             |             |          |       |     |                       |                                         |
|-----------------------------|-------------|----------|-------|-----|-----------------------|-----------------------------------------|
| M0022                       |             |          |       |     |                       |                                         |
| 4                           | V\$STAT1_01 | 0.745266 | 10223 | (-) | NNNSANTTCCGGAANTGNSN  | CTTTATTTTCCCAAATTCAC                    |
| M0022                       |             |          |       |     |                       |                                         |
| 4                           | V\$STAT1_01 | 0.755804 | 10304 | (+) | NNNSANTTCCGGAANTGNSN  | TTCCATTTAAGGAACTGTAG                    |
| M0022                       |             |          |       |     |                       |                                         |
| 4                           | V\$STAT1_01 | 0.722707 | 10304 | (-) | NNNSANTTCCGGAANTGNSN  | TTCCATTTAAGGAACTGTAG                    |
| M0022                       |             |          |       |     |                       |                                         |
| 3                           | V\$STAT_01  | 0.795815 | 10379 | (-) | TTCCCRKAA             | CTCTAAGAA                               |
| M0022                       |             |          |       |     |                       |                                         |
| 4                           | V\$STAT1_01 | 0.767166 | 10406 | (-) | NNNSANTTCCGGAANTGNSN  | AATCTTATCCCGGAACTTGTG                   |
| M0022                       |             |          |       |     |                       |                                         |
| 5                           | V\$STAT3_01 | 0.730775 | 10406 | (-) | NGNNATTTCCSGGAARTGNNN | AATCTTATCCCGGAACTTGTG                   |
| M0022                       |             |          |       |     |                       |                                         |
| 3                           | V\$STAT_01  | 0.883539 | 10412 | (+) | TTCCCRKAA             | ATCCCGGAA                               |
| M0022                       |             |          |       |     |                       |                                         |
| 3                           | V\$STAT_01  | 0.846988 | 10412 | (-) | TTCCCRKAA             | ATCCCGGAA                               |
| M0022                       |             |          |       |     |                       |                                         |
| 3                           | V\$STAT_01  | 0.915301 | 10558 | (+) | TTCCCRKAA             | TTCTCCTAA                               |
| M0022                       |             |          |       |     |                       |                                         |
| 3                           | V\$STAT_01  | 0.799849 | 10610 | (+) | TTCCCRKAA             | TTCTGACAA                               |
| M0022                       |             |          |       |     |                       |                                         |
| 3                           | V\$STAT_01  | 0.826317 | 10610 | (-) | TTCCCRKAA             | TTCTGACAA                               |
| M0022                       |             |          |       |     |                       |                                         |
| 3                           | V\$STAT_01  | 0.805899 | 10752 | (+) | TTCCCRKAA             | TGACTGTAA                               |
| M0022                       |             |          |       |     |                       |                                         |
| 3                           | V\$STAT_01  | 0.8364   | 10802 | (-) | TTCCCRKAA             | TTATAGCAA<br>TAAGACTTTAGGGAAAA-<br>GAGC |
| M0022                       |             |          |       |     |                       |                                         |
| 4                           | V\$STAT1_01 | 0.786267 | 10827 | (+) | NNNSANTTCCGGAANTGNSN  | TAAGACTTTAGGGAAAA-<br>GAGC              |
| M0022                       |             |          |       |     |                       |                                         |
| 5                           | V\$STAT3_01 | 0.737002 | 10827 | (-) | NGNNATTTCCSGGAARTGNNN |                                         |
| M0022                       |             |          |       |     |                       |                                         |
| 3                           | V\$STAT_01  | 0.794807 | 10833 | (-) | TTCCCRKAA             | TTTAGGGAA                               |
| M0022                       |             |          |       |     |                       |                                         |
| 3                           | V\$STAT_01  | 0.846483 | 10834 | (-) | TTCCCRKAA             | TTAGGGAAA                               |
| M0022                       |             |          |       |     |                       |                                         |
| 3                           | V\$STAT_01  | 0.795815 | 11028 | (-) | TTCCCRKAA             | ATCTAAGAA                               |
| M0022                       |             |          |       |     |                       |                                         |
| 3                           | V\$STAT_01  | 0.822536 | 11120 | (+) | TTCCCRKAA             | TGCTCAGAA                               |
| M0022                       |             |          |       |     |                       |                                         |
| 3                           | V\$STAT_01  | 0.840686 | 11120 | (-) | TTCCCRKAA             | TGCTCAGAA                               |
| <b>CSN1S2_Camelus ferus</b> |             |          |       |     |                       |                                         |
| M0013                       |             | 0.7655   |       |     |                       |                                         |
| 5                           | V\$OCT1_01  | 48       | 2     | (+) | NNNNWTATGCAAATNTNNN   | GGAAATAAGGTAATATTTT                     |
| M0016                       |             | 0.8472   |       |     |                       |                                         |
| 2                           | V\$OCT1_06  | 66       | 5     | (+) | CWNAWTKWSATRYN        | AATAAGGTAATATT                          |
| M0013                       |             | 0.8787   |       |     | NNNNNNNWATGCAAATNNNWN |                                         |
| 8                           | V\$OCT1_04  | 12       | 9     | (-) | NW                    | AGGTAATATTTTCATTTATCTC                  |
| M0013                       |             | 0.7888   |       |     |                       |                                         |
| 5                           | V\$OCT1_01  | 21       | 11    | (-) | NNNNWTATGCAAATNTNNN   | GTAATATTTTCATTTATCT                     |
| M0016                       |             |          |       |     |                       |                                         |
| 2                           | V\$OCT1_06  | 0.9375   | 13    | (+) | CWNAWTKWSATRYN        | AATATTTTCATTTA                          |
| M0019                       |             | 0.8223   |       |     |                       |                                         |
| 5                           | V\$OCT1_Q6  | 25       | 13    | (-) | NNNNATGCAAATNAN       | AATATTTTCATTTAT                         |
| M0024                       |             | 0.8123   |       |     |                       |                                         |
| 8                           | V\$OCT1_07  | 81       | 13    | (+) | TNTATGNTAATT          | AATATTTTCATT                            |
| M0013                       |             | 0.8182   |       |     | NNNNNNNWATGCAAATNNNWN |                                         |
| 8                           | V\$OCT1_04  | 77       | 49    | (+) | NW                    | TTATGACTTTGTAAAACTTAATA                 |
| M0016                       |             | 0.8003   |       |     |                       |                                         |
| 2                           | V\$OCT1_06  | 91       | 53    | (+) | CWNAWTKWSATRYN        | GACTTTGTAAAACT                          |
| M0013                       |             | 0.8403   |       |     |                       |                                         |
| 7                           | V\$OCT1_03  | 79       | 63    | (+) | NNNRATAATNANNN        | AACTTAATAACAA                           |
| M0013                       |             | 0.7883   |       |     |                       |                                         |
| 6                           | V\$OCT1_02  | 05       | 115   | (+) | NNGAATATKCANNNN       | CTTAAGATGCACTGA                         |
| M0016                       |             | 0.8421   |       |     |                       |                                         |
| 2                           | V\$OCT1_06  | 87       | 140   | (-) | CWNAWTKWSATRYN        | GATAACTAATTGTT                          |

|       |            |        |     |     |                       |                         |
|-------|------------|--------|-----|-----|-----------------------|-------------------------|
| M0013 |            | 0.8403 |     |     |                       |                         |
| 7     | V\$OCT1_03 | 79     | 143 | (-) | NNNRTAATNANNN         | AACTAATTGTTTG           |
| M0016 |            | 0.8042 |     |     |                       |                         |
| 2     | V\$OCT1_06 | 97     | 163 | (+) | CWNAWTKWSATRYN        | CTGATTTACCTCCT          |
| M0019 |            | 0.8365 |     |     |                       |                         |
| 5     | V\$OCT1_Q6 | 17     | 163 | (-) | NNNNATGCAAATNAN       | CTGATTTACCTCCTT         |
| M0013 |            | 0.7973 |     |     | NNNNNNNWATGCAAATNNNWN |                         |
| 8     | V\$OCT1_04 | 65     | 179 | (-) | NW                    | TCAGTGCTTCTGAATACAATTAA |
| M0019 |            | 0.8269 |     |     |                       |                         |
| 5     | V\$OCT1_Q6 | 65     | 188 | (+) | NNNNATGCAAATNAN       | CTGAATACAATTAAC         |
| M0016 |            | 0.8476 |     |     |                       |                         |
| 2     | V\$OCT1_06 | 56     | 189 | (-) | CWNAWTKWSATRYN        | TGAATACAATTAAC          |
| M0013 |            | 0.7623 |     |     |                       |                         |
| 5     | V\$OCT1_01 | 04     | 192 | (-) | NNNNWTATGCAAATNTNNN   | ATACAATTAACGTATAGAT     |
| M0024 |            | 0.8903 |     |     |                       |                         |
| 8     | V\$OCT1_07 | 96     | 196 | (-) | TNTATGNTAATT          | AATTAACGTATA            |
| M0013 |            | 0.7567 |     |     |                       |                         |
| 5     | V\$OCT1_01 | 72     | 301 | (+) | NNNNWTATGCAAATNTNNN   | TTCTACCTGCTAATTCTTC     |
| M0024 |            | 0.8431 |     |     |                       |                         |
| 8     | V\$OCT1_07 | 21     | 304 | (+) | TNTATGNTAATT          | TACCTGCTAATT            |
| M0013 |            | 0.8877 |     |     |                       |                         |
| 7     | V\$OCT1_03 | 91     | 317 | (-) | NNNRTAATNANNN         | TTCTCCTTATGAG           |
| M0016 |            | 0.8527 |     |     |                       |                         |
| 2     | V\$OCT1_06 | 34     | 364 | (+) | CWNAWTKWSATRYN        | CTGATTTAAAAATT          |
| M0013 |            | 0.7346 |     |     |                       |                         |
| 5     | V\$OCT1_01 | 43     | 379 | (-) | NNNNWTATGCAAATNTNNN   | GTTCTCTTGCATTTTGCA      |
| M0013 |            | 0.8010 |     |     |                       |                         |
| 6     | V\$OCT1_02 | 29     | 383 | (-) | NNGAATATKCANNNN       | CTCTTGCATTTTGCA         |
| M0013 |            | 0.8640 |     |     | NNNNNNNWATGCAAATNNNWN |                         |
| 8     | V\$OCT1_04 | 74     | 384 | (-) | NW                    | TCTTGCATTTTGCATTCTGATA  |
| M0013 |            | 0.8124 |     |     |                       |                         |
| 5     | V\$OCT1_01 | 76     | 386 | (-) | NNNNWTATGCAAATNTNNN   | TTGCATTTTGCATTCTGA      |
| M0016 |            | 0.8085 |     |     |                       |                         |
| 2     | V\$OCT1_06 | 94     | 388 | (+) | CWNAWTKWSATRYN        | GCATTTTGCATTTC          |
| M0019 |            | 0.8537 |     |     |                       |                         |
| 5     | V\$OCT1_Q6 | 12     | 388 | (-) | NNNNATGCAAATNAN       | GCATTTTGCATTCT          |
| M0016 |            | 0.8343 |     |     |                       |                         |
| 2     | V\$OCT1_06 | 75     | 394 | (-) | CWNAWTKWSATRYN        | TGCATTTCTGATAG          |
| M0016 |            | 0.8527 |     |     |                       |                         |
| 2     | V\$OCT1_06 | 34     | 401 | (+) | CWNAWTKWSATRYN        | CTGATAGTCATTCT          |
| M0019 |            | 0.8231 |     |     |                       |                         |
| 5     | V\$OCT1_Q6 | 44     | 430 | (+) | NNNNATGCAAATNAN       | AGAGTTGTAAATAAT         |
| M0013 |            | 0.8407 |     |     |                       |                         |
| 7     | V\$OCT1_03 | 74     | 433 | (+) | NNNRTAATNANNN         | GTTGTAAATAATA           |
| M0013 |            | 0.8423 |     |     | NNNNNNNWATGCAAATNNNWN |                         |
| 8     | V\$OCT1_04 | 25     | 436 | (-) | NW                    | GTAAATAATATGCATATGTCAAT |
| M0016 |            | 0.8121 |     |     |                       |                         |
| 2     | V\$OCT1_06 | 09     | 436 | (+) | CWNAWTKWSATRYN        | GTAAATAATATGCA          |
| M0013 |            | 0.8801 |     |     | NNNNNNNWATGCAAATNNNWN |                         |
| 8     | V\$OCT1_04 | 76     | 437 | (+) | NW                    | TAAATAATATGCATATGTCAATA |
| M0013 |            | 0.8302 |     |     |                       |                         |
| 5     | V\$OCT1_01 | 17     | 438 | (-) | NNNNWTATGCAAATNTNNN   | AAATAATATGCATATGTCA     |
| M0013 |            | 0.8557 |     |     |                       |                         |
| 5     | V\$OCT1_01 | 8      | 439 | (+) | NNNNWTATGCAAATNTNNN   | AATAATATGCATATGTCAA     |
| M0013 |            | 0.9296 |     |     |                       |                         |
| 6     | V\$OCT1_02 | 16     | 439 | (+) | NNGAATATKCANNNN       | AATAATATGCATATG         |
| M0016 |            | 0.9010 |     |     |                       |                         |
| 1     | V\$OCT1_05 | 46     | 440 | (+) | MKNATTTGCATAYY        | ATAATATGCATATG          |
| M0016 |            | 0.8265 |     |     |                       |                         |
| 2     | V\$OCT1_06 | 62     | 440 | (+) | CWNAWTKWSATRYN        | ATAATATGCATATG          |
| M0019 |            | 0.8171 |     |     |                       |                         |
| 5     | V\$OCT1_Q6 | 4      | 440 | (-) | NNNNATGCAAATNAN       | ATAATATGCATATGT         |
| M0013 |            | 0.8429 |     |     |                       |                         |
| 6     | V\$OCT1_02 | 89     | 442 | (-) | NNGAATATKCANNNN       | AATATGCATATGTCA         |
| M0016 |            | 0.8343 |     |     |                       |                         |
| 2     | V\$OCT1_06 | 75     | 442 | (-) | CWNAWTKWSATRYN        | AATATGCATATGTC          |

|       |            |        |     |     |                       |                         |
|-------|------------|--------|-----|-----|-----------------------|-------------------------|
| M0024 |            | 0.8284 |     |     |                       |                         |
| 8     | V\$OCT1_07 | 93     | 442 | (-) | TNTATGNTAATT          | AATATGCATATG            |
| M0013 |            | 0.8471 |     |     | NNNNNNNWATGCAAATNNNWN |                         |
| 8     | V\$OCT1_04 | 35     | 443 | (+) | NW                    | ATATGCATATGTCAATAATATAT |
| M0013 |            | 0.7748 |     |     |                       |                         |
| 5     | V\$OCT1_01 | 95     | 445 | (+) | NNNNWTATGCAAATNTNNN   | ATGCATATGTCAATAATAT     |
| M0013 |            | 0.7945 |     |     |                       |                         |
| 6     | V\$OCT1_02 | 32     | 445 | (+) | NNGAATATKCANNNN       | ATGCATATGTCAATA         |
| M0019 |            | 0.8324 |     |     |                       |                         |
| 5     | V\$OCT1_Q6 | 24     | 447 | (+) | NNNNATGCAAATNAN       | GCATATGTCAATAAT         |
| M0016 |            |        |     |     |                       |                         |
| 2     | V\$OCT1_06 | 0.9375 | 448 | (-) | CWNAWTKWSATRYN        | CATATGTCAATAAT          |
| M0013 |            | 0.8343 |     |     | NNNNNNNWATGCAAATNNNWN |                         |
| 8     | V\$OCT1_04 | 79     | 454 | (+) | NW                    | TCAATAATATATAAATAATATAT |
| M0013 |            | 0.8145 |     |     | NNNNNNNWATGCAAATNNNWN |                         |
| 8     | V\$OCT1_04 | 13     | 455 | (-) | NW                    | CAATAATATATAAATAATATATA |
| M0013 |            | 0.7508 |     |     |                       |                         |
| 5     | V\$OCT1_01 | 58     | 456 | (+) | NNNNWTATGCAAATNTNNN   | AATAATATATAAATAATAT     |
| M0013 |            | 0.7996 |     |     | NNNNNNNWATGCAAATNNNWN |                         |
| 8     | V\$OCT1_04 | 65     | 456 | (+) | NW                    | AATAATATATAAATAATATATAA |
| M0019 |            | 0.8277 |     |     |                       |                         |
| 5     | V\$OCT1_Q6 | 84     | 458 | (+) | NNNNATGCAAATNAN       | TAATATATAAATAAT         |
| M0016 |            | 0.8734 |     |     |                       |                         |
| 2     | V\$OCT1_06 | 37     | 459 | (-) | CWNAWTKWSATRYN        | AATATATAAATAAT          |
| M0016 |            | 0.8042 |     |     |                       |                         |
| 2     | V\$OCT1_06 | 97     | 464 | (+) | CWNAWTKWSATRYN        | ATAAATAATATATA          |
| M0013 |            | 0.8053 |     |     | NNNNNNNWATGCAAATNNNWN |                         |
| 8     | V\$OCT1_04 | 12     | 465 | (+) | NW                    | TAAATAATATATAAATTTTTTTC |
| M0013 |            | 0.8126 |     |     | NNNNNNNWATGCAAATNNNWN |                         |
| 8     | V\$OCT1_04 | 31     | 466 | (-) | NW                    | AAATAATATATAAATTTTTTCA  |
| M0024 |            | 0.7935 |     |     |                       |                         |
| 8     | V\$OCT1_07 | 13     | 466 | (-) | TNTATGNTAATT          | AAATAATATATA            |
| M0013 |            | 0.7935 |     |     |                       |                         |
| 5     | V\$OCT1_01 | 9      | 467 | (+) | NNNNWTATGCAAATNTNNN   | AATAATATATAAATTTTTT     |
| M0016 |            | 0.8343 |     |     |                       |                         |
| 2     | V\$OCT1_06 | 75     | 470 | (+) | CWNAWTKWSATRYN        | AATATATAAATTTT          |
| M0016 |            | 0.8812 |     |     |                       |                         |
| 2     | V\$OCT1_06 | 5      | 470 | (-) | CWNAWTKWSATRYN        | AATATATAAATTTT          |
| M0024 |            | 0.8482 |     |     |                       |                         |
| 8     | V\$OCT1_07 | 09     | 470 | (+) | TNTATGNTAATT          | AATATATAAATT            |
| M0013 |            | 0.8383 |     |     | NNNNNNNWATGCAAATNNNWN |                         |
| 8     | V\$OCT1_04 | 52     | 475 | (-) | NW                    | ATAAATTTTTTTCATTACTGTAT |
| M0016 |            | 0.8136 |     |     |                       |                         |
| 2     | V\$OCT1_06 | 72     | 479 | (+) | CWNAWTKWSATRYN        | ATTTTTTTCATTAC          |
| M0013 |            | 0.8881 |     |     |                       |                         |
| 7     | V\$OCT1_03 | 86     | 483 | (-) | NNNRATNANNN           | TTTTCATTACTGT           |
| M0016 |            | 0.8136 |     |     |                       |                         |
| 2     | V\$OCT1_06 | 72     | 514 | (+) | CWNAWTKWSATRYN        | GTACCTGGCATAGT          |
| M0016 |            | 0.8339 |     |     |                       |                         |
| 2     | V\$OCT1_06 | 84     | 525 | (-) | CWNAWTKWSATRYN        | AGTAGCAAATATTC          |
| M0013 |            | 0.8080 |     |     |                       |                         |
| 6     | V\$OCT1_02 | 67     | 526 | (-) | NNGAATATKCANNNN       | GTAGCAAATATTCCT         |
| M0013 |            | 0.8313 |     |     |                       |                         |
| 6     | V\$OCT1_02 | 48     | 529 | (+) | NNGAATATKCANNNN       | GCAAATATTCCTTAA         |
| M0016 |            | 0.8082 |     |     |                       |                         |
| 2     | V\$OCT1_06 | 03     | 532 | (-) | CWNAWTKWSATRYN        | AATATTCCTTAATT          |
| M0016 |            | 0.8531 |     |     |                       |                         |
| 2     | V\$OCT1_06 | 25     | 539 | (+) | CWNAWTKWSATRYN        | CTTAATTTAATTAG          |
| M0024 |            | 0.7933 |     |     |                       |                         |
| 8     | V\$OCT1_07 | 01     | 542 | (-) | TNTATGNTAATT          | AATTTAATTAGT            |
| M0013 |            | 0.8625 |     |     |                       |                         |
| 7     | V\$OCT1_03 | 05     | 543 | (-) | NNNRATNANNN           | ATTTAATTAGTCA           |
| M0013 |            | 0.8419 |     |     |                       |                         |
| 7     | V\$OCT1_03 | 6      | 555 | (-) | NNNRATNANNN           | AATTAATTAACCA           |
| M0013 |            | 0.8406 |     |     | NNNNNNNWATGCAAATNNNWN |                         |
| 8     | V\$OCT1_04 | 52     | 633 | (-) | NW                    | ACCAAGATTTTACATTATGTTGT |

|       |            |        |     |     |                       |                         |
|-------|------------|--------|-----|-----|-----------------------|-------------------------|
| M0013 |            | 0.7596 |     |     |                       |                         |
| 5     | V\$OCT1_01 | 34     | 635 | (-) | NNNNWTATGCAAATNTNNN   | CAAGATTTTACATTATGTT     |
| M0016 |            | 0.8214 |     |     |                       |                         |
| 2     | V\$OCT1_06 | 84     | 637 | (+) | CWNAWKWSATRYN         | AGATTTTACATTAT          |
| M0016 |            | 0.8605 |     |     |                       |                         |
| 2     | V\$OCT1_06 | 47     | 638 | (-) | CWNAWKWSATRYN         | GATTTTACATTATG          |
| M0024 |            | 0.7930 |     |     |                       |                         |
| 8     | V\$OCT1_07 | 89     | 639 | (-) | TNTATGNTAATT          | ATTTTACATTAT            |
| M0013 |            | 0.8553 |     |     |                       |                         |
| 7     | V\$OCT1_03 | 93     | 641 | (-) | NNNRATNANNN           | TTTACATTATGTT           |
| M0013 |            | 0.7806 |     |     | NNNNNNNWATGCAAATNNNWN |                         |
| 8     | V\$OCT1_04 | 36     | 646 | (+) | NW                    | ATTATGTTGTGTTAATTTCTCCT |
| M0013 |            | 0.7533 |     |     |                       |                         |
| 5     | V\$OCT1_01 | 38     | 648 | (+) | NNNNWTATGCAAATNTNNN   | TATGTTGTGTTAATTTCTC     |
| M0024 |            | 0.8573 |     |     |                       |                         |
| 8     | V\$OCT1_07 | 25     | 651 | (+) | TNTATGNTAATT          | GTTGTGTTAATT            |
| M0013 |            | 0.8621 |     |     |                       |                         |
| 7     | V\$OCT1_03 | 1      | 662 | (-) | NNNRATNANNN           | TTCTCCTTATAAA           |
| M0013 |            | 0.8403 |     |     |                       |                         |
| 7     | V\$OCT1_03 | 79     | 667 | (+) | NNNRATNANNN           | CTTATAAAGAACT           |
| M0013 |            | 0.7988 |     |     | NNNNNNNWATGCAAATNNNWN |                         |
| 8     | V\$OCT1_04 | 29     | 671 | (-) | NW                    | TAAAGAACTTGTCATATTCACAT |
| M0013 |            | 0.7327 |     |     |                       |                         |
| 5     | V\$OCT1_01 | 36     | 673 | (-) | NNNNWTATGCAAATNTNNN   | AAGAACTTGTCATATTCAC     |
| M0016 |            | 0.9242 |     |     |                       |                         |
| 2     | V\$OCT1_06 | 19     | 675 | (+) | CWNAWKWSATRYN         | GAACTTGTCATATT          |
| M0016 |            | 0.8574 |     |     |                       |                         |
| 2     | V\$OCT1_06 | 22     | 676 | (-) | CWNAWKWSATRYN         | AACCTTGTCATATTC         |
| M0013 |            | 0.7707 |     |     |                       |                         |
| 6     | V\$OCT1_02 | 09     | 677 | (-) | NNGAATATKCANNNN       | ACTTGTCATATTCAC         |
| M0013 |            | 0.8099 |     |     | NNNNNNNWATGCAAATNNNWN |                         |
| 8     | V\$OCT1_04 | 12     | 677 | (-) | NW                    | ACTTGTCATATTCACATCCATGT |
| M0013 |            | 0.8354 |     |     |                       |                         |
| 6     | V\$OCT1_02 | 09     | 680 | (+) | NNGAATATKCANNNN       | TGTCATATTCACATC         |
| M0016 |            | 0.8382 |     |     |                       |                         |
| 2     | V\$OCT1_06 | 81     | 683 | (+) | CWNAWKWSATRYN         | CATATTCACATCCA          |
| M0016 |            | 0.8085 |     |     |                       |                         |
| 2     | V\$OCT1_06 | 94     | 689 | (-) | CWNAWKWSATRYN         | CACATCCATGTGTT          |
| M0016 |            | 0.8003 |     |     |                       |                         |
| 2     | V\$OCT1_06 | 91     | 692 | (+) | CWNAWKWSATRYN         | ATCCATGTGTTTCT          |
| M0013 |            | 0.7833 |     |     | NNNNNNNWATGCAAATNNNWN |                         |
| 8     | V\$OCT1_04 | 54     | 725 | (-) | NW                    | AGTCTTCATTTCCCTTTCCCAAT |
| M0013 |            | 0.8640 |     |     |                       |                         |
| 7     | V\$OCT1_03 | 85     | 741 | (-) | NNNRATNANNN           | TCCCAATTATTG            |
| M0016 |            | 0.8339 |     |     |                       |                         |
| 2     | V\$OCT1_06 | 84     | 745 | (+) | CWNAWKWSATRYN         | AATTATTGGTACA           |
| M0013 |            | 0.8345 |     |     | NNNNNNNWATGCAAATNNNWN |                         |
| 8     | V\$OCT1_04 | 88     | 752 | (+) | NW                    | TGGTACAAATATAAATTAATATA |
| M0013 |            | 0.8304 |     |     | NNNNNNNWATGCAAATNNNWN |                         |
| 8     | V\$OCT1_04 | 06     | 753 | (-) | NW                    | GGTACAAATATAAATTAATATAT |
| M0019 |            | 0.8149 |     |     |                       |                         |
| 5     | V\$OCT1_Q6 | 56     | 756 | (+) | NNNNATGCAAATNAN       | ACAAATATAAATTAA         |
| M0013 |            | 0.8567 |     |     | NNNNNNNWATGCAAATNNNWN |                         |
| 8     | V\$OCT1_04 | 54     | 758 | (+) | NW                    | AAATATAAATTAATATATAATTA |
| M0013 |            | 0.8232 |     |     | NNNNNNNWATGCAAATNNNWN |                         |
| 8     | V\$OCT1_04 | 96     | 759 | (-) | NW                    | AATATAAATTAATATATAATTAA |
| M0013 |            | 0.7552 |     |     |                       |                         |
| 5     | V\$OCT1_01 | 46     | 761 | (-) | NNNNWTATGCAAATNTNNN   | TATAAATTAATATATAATT     |
| M0013 |            | 0.8477 |     |     | NNNNNNNWATGCAAATNNNWN |                         |
| 8     | V\$OCT1_04 | 62     | 762 | (+) | NW                    | ATAAATTAATATATAATTAATGA |
| M0024 |            | 0.8914 |     |     |                       |                         |
| 8     | V\$OCT1_07 | 56     | 765 | (-) | TNTATGNTAATT          | AATTAATATATA            |
| M0016 |            | 0.8812 |     |     |                       |                         |
| 2     | V\$OCT1_06 | 5      | 769 | (-) | CWNAWKWSATRYN         | AATATATAATTAAT          |
| M0013 |            | 0.8459 |     |     |                       |                         |
| 7     | V\$OCT1_03 | 11     | 771 | (+) | NNNRATNANNN           | TATATAATTAATG           |

|       |            |        |      |     |                       |                          |
|-------|------------|--------|------|-----|-----------------------|--------------------------|
| M0013 |            | 0.8415 |      |     |                       |                          |
| 7     | V\$OCT1_03 | 65     | 772  | (-) | NNNRATAATNANNN        | ATATAATTAATGA            |
| M0013 |            | 0.8787 |      |     |                       |                          |
| 7     | V\$OCT1_03 | 04     | 775  | (+) | NNNRATAATNANNN        | TAATTAATGAGGA            |
| M0016 |            | 0.8210 |      |     |                       |                          |
| 2     | V\$OCT1_06 | 94     | 787  | (+) | CWNAWTKWSATRYN        | AAATATGGGAAATA           |
| M0016 |            | 0.8984 |      |     |                       |                          |
| 2     | V\$OCT1_06 | 37     | 796  | (+) | CWNAWTKWSATRYN        | AAATATGTGATTTC           |
| M0016 |            | 0.8121 |      |     |                       |                          |
| 2     | V\$OCT1_06 | 09     | 797  | (-) | CWNAWTKWSATRYN        | AATATGTGATTTC            |
| M0016 |            | 0.8187 |      |     |                       |                          |
| 2     | V\$OCT1_06 | 5      | 804  | (-) | CWNAWTKWSATRYN        | GATTTCAAAAAGAG           |
| M0013 |            | 0.8632 |      |     |                       |                          |
| 7     | V\$OCT1_03 | 95     | 859  | (+) | NNNRATAATNANNN        | TAAGTAAACATGA            |
| M0016 |            | 0.9062 |      |     |                       |                          |
| 2     | V\$OCT1_06 | 5      | 864  | (+) | CWNAWTKWSATRYN        | AAACATGAAATTTT           |
| M0016 |            | 0.9660 |      |     |                       |                          |
| 2     | V\$OCT1_06 | 16     | 865  | (-) | CWNAWTKWSATRYN        | AACATGAAATTTT            |
| M0013 |            | 0.8015 |      |     | NNNNNNNWATGCAAATNNNWN |                          |
| 8     | V\$OCT1_04 | 47     | 867  | (-) | NW                    | CATGAAATTTTTCATTTTACCT   |
| M0013 |            | 0.7565 |      |     |                       |                          |
| 5     | V\$OCT1_01 | 81     | 869  | (-) | NNNNWTATGCAAATNTNNN   | TGAAATTTTTCATTTTAC       |
| M0016 |            | 0.9113 |      |     |                       |                          |
| 2     | V\$OCT1_06 | 28     | 871  | (+) | CWNAWTKWSATRYN        | AAATTTTTCATTTT           |
| M0016 |            | 0.8550 |      |     |                       |                          |
| 2     | V\$OCT1_06 | 78     | 872  | (-) | CWNAWTKWSATRYN        | AATTTTTCATTTT            |
| M0013 |            | 0.8648 |      |     |                       |                          |
| 7     | V\$OCT1_03 | 76     | 878  | (-) | NNNRATAATNANNN        | TCATTTTACCTG             |
| M0016 |            | 0.8628 |      |     |                       |                          |
| 2     | V\$OCT1_06 | 91     | 879  | (+) | CWNAWTKWSATRYN        | CATTTTACCTGCC            |
| M0019 |            | 0.8400 |      |     |                       |                          |
| 5     | V\$OCT1_Q6 | 66     | 904  | (+) | NNNNATGCAAATNAN       | GTTCTTGCAAAGCAT          |
| M0013 |            | 0.7361 |      |     |                       |                          |
| 5     | V\$OCT1_01 | 69     | 911  | (+) | NNNNWTATGCAAATNTNNN   | CAAAGCATGTAAGTATAAT      |
| M0016 |            | 0.8968 |      |     |                       |                          |
| 2     | V\$OCT1_06 | 75     | 914  | (-) | CWNAWTKWSATRYN        | AGCATGTAAGTATA           |
| M0013 |            | 0.9146 |      |     |                       |                          |
| 7     | V\$OCT1_03 | 58     | 922  | (+) | NNNRATAATNANNN        | AGTATAATAAGAT            |
| M0016 |            |        |      |     |                       |                          |
| 2     | V\$OCT1_06 | 0.825  | 924  | (+) | CWNAWTKWSATRYN        | TATAATAAGATATT           |
| M0013 |            | 0.7915 |      |     | NNNNNNNWATGCAAATNNNWN |                          |
| 8     | V\$OCT1_04 | 1      | 926  | (-) | NW                    | TAATAAGATATTTATAAGTACCT  |
| M0013 |            | 0.7837 |      |     | NNNNNNNWATGCAAATNNNWN |                          |
| 8     | V\$OCT1_04 | 72     | 947  | (+) | NW                    | CTCCTGTTATTTAAATATTAGAA  |
| M0013 |            | 0.8354 |      |     | NNNNNNNWATGCAAATNNNWN |                          |
| 8     | V\$OCT1_04 | 25     | 948  | (-) | NW                    | TCCTGTTATTTAAATATTAGAAG  |
| M0013 |            | 0.7678 |      |     |                       |                          |
| 5     | V\$OCT1_01 | 37     | 949  | (+) | NNNNWTATGCAAATNTNNN   | CCTGTTATTTAAATATTAG      |
| M0013 |            | 0.7758 |      |     |                       |                          |
| 5     | V\$OCT1_01 | 49     | 950  | (-) | NNNNWTATGCAAATNTNNN   | CTGTTATTTAAATATTAGA      |
| M0016 |            | 0.9296 |      |     |                       |                          |
| 2     | V\$OCT1_06 | 88     | 952  | (+) | CWNAWTKWSATRYN        | GTTATTTAAATATT           |
| M0016 |            | 0.8476 |      |     |                       |                          |
| 2     | V\$OCT1_06 | 56     | 952  | (-) | CWNAWTKWSATRYN        | GTTATTTAAATATT           |
| M0019 |            | 0.8182 |      |     |                       |                          |
| 5     | V\$OCT1_Q6 | 31     | 952  | (-) | NNNNATGCAAATNAN       | GTTATTTAAATATTA          |
| M0013 |            | 0.8050 |      |     |                       |                          |
| 6     | V\$OCT1_02 | 89     | 954  | (-) | NNGAATATKCANNNN       | TATTTAAATATTAGA          |
| M0016 |            | 0.8292 |      |     |                       |                          |
| 2     | V\$OCT1_06 | 97     | 974  | (+) | CWNAWTKWSATRYN        | GACTCTTTTATGCA           |
| M0013 |            | 0.7927 |      |     | NNNNNNNWATGCAAATNNNWN |                          |
| 8     | V\$OCT1_04 | 65     | 1028 | (+) | NW                    | GTGTGAACCTTTTATAATCAAAGA |
| M0013 |            | 0.8889 |      |     |                       |                          |
| 7     | V\$OCT1_03 | 77     | 1037 | (+) | NNNRATAATNANNN        | TTTATAATCAAAG            |
| M0016 |            | 0.8265 |      |     |                       |                          |
| 2     | V\$OCT1_06 | 62     | 1039 | (-) | CWNAWTKWSATRYN        | TATAATCAAAGATG           |

|       |             |        |      |     |                      |                      |
|-------|-------------|--------|------|-----|----------------------|----------------------|
| M0005 |             | 0.8420 |      |     |                      |                      |
| 9     | V\$YY1_01   | 71     | 15   | (+) | NNNNNCCATNTWNNNWN    | TATTTTCATTTATCTTC    |
| M0005 |             | 0.7726 |      |     |                      |                      |
| 9     | V\$YY1_01   | 08     | 113  | (-) | NNNNNCCATNTWNNNWN    | ACCTTAAGATGCACTGA    |
| M0005 |             | 0.8810 |      |     |                      |                      |
| 9     | V\$YY1_01   | 62     | 336  | (+) | NNNNNCCATNTWNNNWN    | AGACTCCATGTTTTGGC    |
| M0005 |             | 0.8197 |      |     |                      |                      |
| 9     | V\$YY1_01   | 9      | 677  | (+) | NNNNNCCATNTWNNNWN    | ACTTGTCATATTACAT     |
| M0005 |             | 0.7824 |      |     |                      |                      |
| 9     | V\$YY1_01   | 38     | 725  | (+) | NNNNNCCATNTWNNNWN    | AGTCTTCATTTCCTTT     |
| M0005 |             | 0.7876 |      |     |                      |                      |
| 9     | V\$YY1_01   | 8      | 731  | (+) | NNNNNCCATNTWNNNWN    | CATTTCCCTTTCCCAAT    |
| M0005 |             | 0.8034 |      |     |                      |                      |
| 9     | V\$YY1_01   | 08     | 783  | (-) | NNNNNCCATNTWNNNWN    | GAGGAAATATGGGAAAT    |
| M0005 |             | 0.8204 |      |     |                      |                      |
| 9     | V\$YY1_01   | 46     | 834  | (+) | NNNNNCCATNTWNNNWN    | CAGCCCCATATCTGTTC    |
| M0005 |             | 0.8214 |      |     |                      |                      |
| 9     | V\$YY1_01   | 29     | 860  | (-) | NNNNNCCATNTWNNNWN    | AAGTAAACATGAAATTT    |
| M0005 |             | 0.7755 |      |     |                      |                      |
| 9     | V\$YY1_01   | 57     | 910  | (+) | NNNNNCCATNTWNNNWN    | GCAAAGCATGTAAGTAT    |
| M0005 |             | 0.7837 |      |     |                      |                      |
| 9     | V\$YY1_01   | 48     | 984  | (-) | NNNNNCCATNTWNNNWN    | TGCAGACAATGGCAAGG    |
| M0006 |             | 0.8634 |      |     |                      |                      |
| 9     | V\$YY1_02   | 42     | 1040 | (-) | NNNCGGCCATCTTGNCTSNW | ATAATCAAAGATGGCACTGG |
| M0005 |             | 0.8679 |      |     |                      |                      |
| 9     | V\$YY1_01   | 55     | 1042 | (-) | NNNNNCCATNTWNNNWN    | AATCAAAGATGGCACTG    |
| M0020 |             | 0.9164 |      |     |                      |                      |
| 3     | V\$GATA_C   | 34     | 19   | (-) | NGATAAGNMNN          | TTCATTTATCT          |
| M0012 |             | 0.7984 |      |     |                      |                      |
| 6     | V\$GATA1_02 | 38     | 20   | (-) | NNNNNGATANKGNN       | TCATTTATCTTCCT       |
| M0012 |             | 0.9358 |      |     |                      |                      |
| 7     | V\$GATA1_03 | 16     | 20   | (-) | RNSNNGATAANNGN       | TCATTTATCTTCCT       |
| M0012 |             | 0.9025 |      |     |                      |                      |
| 8     | V\$GATA1_04 | 74     | 20   | (-) | NNCWGATARNNNN        | TCATTTATCTTCC        |
| M0007 |             | 0.8178 |      |     |                      |                      |
| 5     | V\$GATA1_01 | 68     | 22   | (-) | SNNGATNNNN           | ATTTATCTTC           |
| M0007 |             | 0.8538 |      |     |                      |                      |
| 6     | V\$GATA2_01 | 57     | 22   | (-) | NNNGATRNNN           | ATTTATCTTC           |
| M0007 |             | 0.8466 |      |     |                      |                      |
| 7     | V\$GATA3_01 | 99     | 22   | (-) | NNGATARNG            | ATTTATCTT            |
| M0012 |             |        |      |     |                      |                      |
| 6     | V\$GATA1_02 | 0.7775 | 93   | (+) | NNNNNGATANKGNN       | TTAAAGAAACTAGT       |
| M0007 |             | 0.7862 |      |     |                      |                      |
| 5     | V\$GATA1_01 | 78     | 117  | (+) | SNNGATNNNN           | TAAGATGCAC           |
| M0007 |             | 0.8335 |      |     |                      |                      |
| 6     | V\$GATA2_01 | 59     | 117  | (+) | NNNGATRNNN           | TAAGATGCAC           |
| M0007 |             | 0.8627 |      |     |                      |                      |
| 5     | V\$GATA1_01 | 84     | 129  | (+) | SNNGATNNNN           | AGAGATTGTT           |
| M0007 |             | 0.8421 |      |     |                      |                      |
| 6     | V\$GATA2_01 | 29     | 129  | (+) | NNNGATRNNN           | AGAGATTGTT           |
| M0007 |             |        |      |     |                      |                      |
| 7     | V\$GATA3_01 | 0.8786 | 130  | (+) | NNGATARNG            | GAGATTGTT            |
| M0007 |             | 0.7798 |      |     |                      |                      |
| 5     | V\$GATA1_01 | 62     | 137  | (+) | SNNGATNNNN           | TTCGATAACT           |
| M0007 |             | 0.8137 |      |     |                      |                      |
| 6     | V\$GATA2_01 | 12     | 137  | (+) | NNNGATRNNN           | TTCGATAACT           |
| M0007 |             | 0.7744 |      |     |                      |                      |
| 5     | V\$GATA1_01 | 32     | 162  | (+) | SNNGATNNNN           | ACTGATTTAC           |
| M0012 |             | 0.7737 |      |     |                      |                      |
| 6     | V\$GATA1_02 | 5      | 203  | (+) | NNNNNGATANKGNN       | GTATAGATGTTGGA       |
| M0007 |             | 0.7862 |      |     |                      |                      |
| 5     | V\$GATA1_01 | 78     | 205  | (+) | SNNGATNNNN           | ATAGATGTTG           |
| M0007 |             | 0.8236 |      |     |                      |                      |
| 7     | V\$GATA3_01 | 6      | 206  | (+) | NNGATARNG            | TAGATGTTG            |
| M0007 |             | 0.8494 |      |     |                      |                      |
| 5     | V\$GATA1_01 | 57     | 232  | (+) | SNNGATNNNN           | CAAGATTCAG           |

|       |             |        |     |     |                |                |
|-------|-------------|--------|-----|-----|----------------|----------------|
| M0007 |             | 0.8231 |     |     |                |                |
| 6     | V\$GATA2_01 | 84     | 232 | (+) | NNNGATRNNN     | CAAGATTCAG     |
| M0007 |             | 0.8289 |     |     |                |                |
| 7     | V\$GATA3_01 | 77     | 233 | (+) | NNGATARNG      | AAGATTCAG      |
| M0007 |             | 0.7884 |     |     |                |                |
| 6     | V\$GATA2_01 | 53     | 244 | (-) | NNNGATRNNN     | GCCTGTCCTA     |
| M0007 |             | 0.7714 |     |     |                |                |
| 5     | V\$GATA1_01 | 71     | 262 | (+) | SNNGATNNNN     | TGGGATCAGC     |
| M0007 |             | 0.8514 |     |     |                |                |
| 5     | V\$GATA1_01 | 31     | 262 | (-) | SNNGATNNNN     | TGGGATCAGC     |
| M0007 |             | 0.8403 |     |     |                |                |
| 6     | V\$GATA2_01 | 25     | 262 | (+) | NNNGATRNNN     | TGGGATCAGC     |
| M0007 |             | 0.8416 |     |     |                |                |
| 6     | V\$GATA2_01 | 78     | 262 | (-) | NNNGATRNNN     | TGGGATCAGC     |
| M0012 |             | 0.7951 |     |     |                |                |
| 7     | V\$GATA1_03 | 98     | 270 | (-) | RNSNNGATAANNGN | GCAATTCTCCTTGT |
| M0012 |             | 0.7910 |     |     |                |                |
| 7     | V\$GATA1_03 | 34     | 313 | (-) | RNSNNGATAANNGN | ATTCTTCTCCTTAT |
| M0012 |             | 0.8272 |     |     |                |                |
| 8     | V\$GATA1_04 | 06     | 319 | (-) | NNCWGATARNNNN  | CTCCTTATGAGGA  |
| M0007 |             | 0.7970 |     |     |                |                |
| 6     | V\$GATA2_01 | 23     | 321 | (-) | NNNGATRNNN     | CCTTATGAGG     |
| M0007 |             | 0.7808 |     |     |                |                |
| 5     | V\$GATA1_01 | 49     | 358 | (-) | SNNGATNNNN     | TGAAATCTGA     |
| M0007 |             | 0.8272 |     |     |                |                |
| 6     | V\$GATA2_01 | 44     | 358 | (-) | NNNGATRNNN     | TGAAATCTGA     |
| M0012 |             | 0.8240 |     |     |                |                |
| 6     | V\$GATA1_02 | 63     | 398 | (+) | NNNNNGATANKGNN | TTTCTGATAGTCAT |
| M0012 |             | 0.8878 |     |     |                |                |
| 8     | V\$GATA1_04 | 68     | 399 | (+) | NNCWGATARNNNN  | TTCTGATAGTCAT  |
| M0007 |             | 0.8928 |     |     |                |                |
| 5     | V\$GATA1_01 | 92     | 400 | (+) | SNNGATNNNN     | TCTGATAGTC     |
| M0007 |             | 0.9242 |     |     |                |                |
| 6     | V\$GATA2_01 | 22     | 400 | (+) | NNNGATRNNN     | TCTGATAGTC     |
| M0007 |             | 0.8657 |     |     |                |                |
| 7     | V\$GATA3_01 | 51     | 401 | (+) | NNGATARNG      | CTGATAGTC      |
| M0020 |             | 0.8353 |     |     |                |                |
| 3     | V\$GATA_C   | 53     | 402 | (+) | NGATAAGNMNN    | TGATAGTCATT    |
| M0007 |             | 0.8449 |     |     |                |                |
| 7     | V\$GATA3_01 | 27     | 419 | (+) | NNGATARNG      | AAGATTAAA      |
| M0007 |             | 0.7974 |     |     |                |                |
| 6     | V\$GATA2_01 | 74     | 447 | (-) | NNNGATRNNN     | GCATATGTCA     |
| M0020 |             | 0.8493 |     |     |                |                |
| 3     | V\$GATA_C   | 32     | 489 | (-) | NGATAAGNMNN    | TTACTGTATCT    |
| M0012 |             | 0.8759 |     |     |                |                |
| 6     | V\$GATA1_02 | 38     | 490 | (-) | NNNNNGATANKGNN | TACTGTATCTTCAC |
| M0012 |             | 0.8248 |     |     |                |                |
| 7     | V\$GATA1_03 | 41     | 490 | (-) | RNSNNGATAANNGN | TACTGTATCTTCAC |
| M0007 |             | 0.8687 |     |     |                |                |
| 5     | V\$GATA1_01 | 07     | 492 | (-) | SNNGATNNNN     | CTGTATCTTC     |
| M0007 |             | 0.8930 |     |     |                |                |
| 6     | V\$GATA2_01 | 99     | 492 | (-) | NNNGATRNNN     | CTGTATCTTC     |
| M0007 |             | 0.8626 |     |     |                |                |
| 7     | V\$GATA3_01 | 5      | 492 | (-) | NNGATARNG      | CTGTATCTT      |
| M0007 |             | 0.8159 |     |     |                |                |
| 6     | V\$GATA2_01 | 68     | 519 | (+) | NNNGATRNNN     | TGGCATAGTA     |
| M0012 |             | 0.8109 |     |     |                |                |
| 6     | V\$GATA1_02 | 37     | 569 | (+) | NNNNNGATANKGNN | TTATACATAGGGTC |
| M0012 |             | 0.8329 |     |     |                |                |
| 7     | V\$GATA1_03 | 25     | 589 | (-) | RNSNNGATAANNGN | CCTACTAACTTGCT |
| M0007 |             | 0.8208 |     |     |                |                |
| 5     | V\$GATA1_01 | 29     | 635 | (+) | SNNGATNNNN     | CAAGATTTTA     |
| M0007 |             | 0.8092 |     |     |                |                |
| 6     | V\$GATA2_01 | 02     | 635 | (+) | NNNGATRNNN     | CAAGATTTTA     |
| M0007 |             | 0.8329 |     |     |                |                |
| 7     | V\$GATA3_01 | 64     | 636 | (+) | NNGATARNG      | AAGATTTTA      |

|       |             |        |     |     |                 |                 |
|-------|-------------|--------|-----|-----|-----------------|-----------------|
| M0007 |             | 0.7938 |     |     |                 |                 |
| 6     | V\$GATA2_01 | 66     | 645 | (-) | NNNGATRNNN      | CATTATGTTG      |
| M0020 |             | 0.8536 |     |     |                 |                 |
| 3     | V\$GATA_C   | 81     | 674 | (-) | NGATAAGNMNN     | AGAACTTGTC      |
| M0020 |             | 0.9176 |     |     |                 |                 |
| 3     | V\$GATA_C   | 76     | 715 | (-) | NGATAAGNMNN     | TGCTTTTATCA     |
| M0012 |             | 0.8031 |     |     |                 |                 |
| 6     | V\$GATA1_02 | 25     | 716 | (-) | NNNNNGATANKGNN  | GCTTTTATCAGTCT  |
| M0012 |             | 0.9186 |     |     |                 |                 |
| 7     | V\$GATA1_03 | 67     | 716 | (-) | RNSNNGATAANNGN  | GCTTTTATCAGTCT  |
| M0012 |             | 0.9329 |     |     |                 |                 |
| 8     | V\$GATA1_04 | 04     | 716 | (-) | NNCWGATARNNNN   | GCTTTTATCAGTC   |
| M0007 |             | 0.8493 |     |     |                 |                 |
| 7     | V\$GATA3_01 | 58     | 718 | (-) | NNGATARNG       | TTTTATCAG       |
| M0007 |             | 0.7916 |     |     |                 |                 |
| 6     | V\$GATA2_01 | 1      | 787 | (-) | NNNGATRNNN      | AAATATGGGA      |
| M0007 |             | 0.7947 |     |     |                 |                 |
| 6     | V\$GATA2_01 | 68     | 796 | (-) | NNNGATRNNN      | AAATATGTGA      |
| M0007 |             | 0.8094 |     |     |                 |                 |
| 5     | V\$GATA1_01 | 77     | 801 | (+) | SNNGATNNNN      | TGTGATTCA       |
| M0007 |             | 0.8159 |     |     |                 |                 |
| 6     | V\$GATA2_01 | 68     | 801 | (+) | NNNGATRNNN      | TGTGATTCA       |
| M0007 |             | 0.8079 |     |     |                 |                 |
| 5     | V\$GATA1_01 | 96     | 828 | (-) | SNNGATNNNN      | ATTGATCAGC      |
| M0007 |             | 0.7861 |     |     |                 |                 |
| 6     | V\$GATA2_01 | 98     | 828 | (-) | NNNGATRNNN      | ATTGATCAGC      |
| M0007 |             | 0.8195 |     |     |                 |                 |
| 6     | V\$GATA2_01 | 76     | 837 | (+) | NNNGATRNNN      | CCCCATATCT      |
| M0012 |             | 0.9034 |     |     |                 |                 |
| 6     | V\$GATA1_02 | 38     | 837 | (-) | NNNNNGATANKGNN  | CCCCATATCTGTTC  |
| M0012 |             | 0.8143 |     |     |                 |                 |
| 7     | V\$GATA1_03 | 07     | 837 | (-) | RNSNNGATAANNGN  | CCCCATATCTGTTC  |
| M0012 |             | 0.9325 |     |     |                 |                 |
| 8     | V\$GATA1_04 | 98     | 837 | (-) | NNCWGATARNNNN   | CCCCATATCTGTT   |
| M0007 |             | 0.8553 |     |     |                 |                 |
| 5     | V\$GATA1_01 | 8      | 839 | (-) | SNNGATNNNN      | CCATATCTGT      |
| M0007 |             | 0.8894 |     |     |                 |                 |
| 6     | V\$GATA2_01 | 9      | 839 | (-) | NNNGATRNNN      | CCATATCTGT      |
| M0007 |             | 0.9167 |     |     |                 |                 |
| 7     | V\$GATA3_01 | 04     | 839 | (-) | NNGATARNG       | CCATATCTG       |
| M0012 |             | 0.8116 |     |     |                 |                 |
| 7     | V\$GATA1_03 | 12     | 880 | (-) | RNSNNGATAANNGN  | ATTTTACCTGCCT   |
| M0012 |             | 0.7836 |     |     |                 |                 |
| 7     | V\$GATA1_03 | 84     | 919 | (+) | RNSNNGATAANNGN  | GTAAGTATAATAAG  |
| M0012 |             | 0.8501 |     |     |                 |                 |
| 8     | V\$GATA1_04 | 84     | 928 | (+) | NNCWGATARNNNN   | ATAAGATATTTAT   |
| M0007 |             | 0.8193 |     |     |                 |                 |
| 5     | V\$GATA1_01 | 48     | 929 | (+) | SNNGATNNNN      | TAAGATATTT      |
| M0007 |             | 0.8944 |     |     |                 |                 |
| 6     | V\$GATA2_01 | 52     | 929 | (+) | NNNGATRNNN      | TAAGATATTT      |
| M0007 |             | 0.8347 |     |     |                 |                 |
| 7     | V\$GATA3_01 | 36     | 930 | (+) | NNGATARNG       | AAGATATTT       |
| M0012 |             | 0.7817 |     |     |                 |                 |
| 7     | V\$GATA1_03 | 25     | 933 | (+) | RNSNNGATAANNGN  | ATATTTATAAGTAC  |
| M0007 |             | 0.7739 |     |     |                 |                 |
| 5     | V\$GATA1_01 | 39     | 949 | (+) | SNNGATNNNN      | CCTGTTATTT      |
| M0012 |             | 0.8633 |     |     |                 |                 |
| 7     | V\$GATA1_03 | 02     | 983 | (+) | RNSNNGATAANNGN  | ATGCAGACAATGGC  |
| M0021 |             | 0.8978 |     |     |                 |                 |
| 6     | V\$TATA_C   | 08     | 39  | (+) | NCTATAAAAR      | TCTATATAAC      |
| M0025 |             | 0.8340 |     |     |                 |                 |
| 2     | V\$TATA_01  | 52     | 40  | (+) | STATAAAWRNNNNNN | CTATATAACTTATGA |
| M0021 |             | 0.7694 |     |     |                 |                 |
| 6     | V\$TATA_C   | 75     | 54  | (+) | NCTATAAAAR      | ACTTTGTAAA      |
| M0021 |             | 0.7755 |     |     |                 |                 |
| 6     | V\$TATA_C   | 48     | 56  | (+) | NCTATAAAAR      | TTTGTA AAAAC    |



|       |            |        |     |     |                 |                 |
|-------|------------|--------|-----|-----|-----------------|-----------------|
| M0021 |            | 0.7430 |     |     |                 |                 |
| 6     | V\$TATA_C  | 68     | 64  | (+) | NCTATAAAAR      | ACTTAATAAC      |
| M0021 |            | 0.7528 |     |     |                 |                 |
| 6     | V\$TATA_C  | 39     | 77  | (+) | NCTATAAAAR      | TCTCCAAAAA      |
| M0021 |            | 0.7723 |     |     |                 |                 |
| 6     | V\$TATA_C  | 79     | 89  | (+) | NCTATAAAAR      | ATTTTTAAAG      |
| M0025 |            | 0.7949 |     |     |                 |                 |
| 2     | V\$TATA_01 | 76     | 89  | (+) | STATAAAWRNNNNNN | ATTTTTAAAGAACT  |
| M0021 |            | 0.7681 |     |     |                 |                 |
| 6     | V\$TATA_C  | 54     | 90  | (+) | NCTATAAAAR      | TTTTTAAAGA      |
| M0025 |            | 0.7746 |     |     |                 |                 |
| 2     | V\$TATA_01 | 76     | 91  | (+) | STATAAAWRNNNNNN | TTTTAAAGAACTAG  |
| M0021 |            | 0.7890 |     |     |                 |                 |
| 6     | V\$TATA_C  | 15     | 113 | (+) | NCTATAAAAR      | ACCTTAAGAT      |
| M0021 |            | 0.7604 |     |     |                 |                 |
| 6     | V\$TATA_C  | 96     | 320 | (+) | NCTATAAAAR      | TCCTTATGAG      |
| M0021 |            | 0.8362 |     |     |                 |                 |
| 6     | V\$TATA_C  | 82     | 366 | (+) | NCTATAAAAR      | GATTTAAAAA      |
| M0021 |            | 0.7435 |     |     |                 |                 |
| 6     | V\$TATA_C  | 97     | 367 | (+) | NCTATAAAAR      | ATTTAAAAAT      |
| M0025 |            | 0.8023 |     |     |                 |                 |
| 2     | V\$TATA_01 | 34     | 367 | (+) | STATAAAWRNNNNNN | ATTTAAAAATTAGTT |
| M0025 |            | 0.7921 |     |     |                 |                 |
| 2     | V\$TATA_01 | 85     | 420 | (+) | STATAAAWRNNNNNN | AGATTAAAGAAGAGT |
| M0021 |            | 0.7501 |     |     |                 |                 |
| 6     | V\$TATA_C  | 98     | 435 | (+) | NCTATAAAAR      | TGTAATAAT       |
| M0021 |            | 0.7686 |     |     |                 |                 |
| 6     | V\$TATA_C  | 82     | 454 | (+) | NCTATAAAAR      | TCAATAATAT      |
| M0021 |            | 0.8022 |     |     |                 |                 |
| 6     | V\$TATA_C  | 18     | 459 | (+) | NCTATAAAAR      | AATATATAAA      |
| M0025 |            | 0.8469 |     |     |                 |                 |
| 2     | V\$TATA_01 | 93     | 460 | (+) | STATAAAWRNNNNNN | ATATATAAATAATAT |
| M0021 |            | 0.7517 |     |     |                 |                 |
| 6     | V\$TATA_C  | 82     | 461 | (+) | NCTATAAAAR      | TATATAAATA      |
| M0025 |            | 0.8297 |     |     |                 |                 |
| 2     | V\$TATA_01 | 39     | 462 | (+) | STATAAAWRNNNNNN | ATATAAATAATATAT |
| M0021 |            | 0.8022 |     |     |                 |                 |
| 6     | V\$TATA_C  | 18     | 470 | (+) | NCTATAAAAR      | AATATATAAA      |
| M0025 |            | 0.8216 |     |     |                 |                 |
| 2     | V\$TATA_01 | 19     | 471 | (+) | STATAAAWRNNNNNN | ATATATAAATTTTTT |
| M0025 |            | 0.7954 |     |     |                 |                 |
| 2     | V\$TATA_01 | 83     | 473 | (+) | STATAAAWRNNNNNN | ATATAAATTTTTTTC |
| M0025 |            | 0.7761 |     |     |                 |                 |
| 2     | V\$TATA_01 | 99     | 569 | (+) | STATAAAWRNNNNNN | TTATACATAGGGTCA |
| M0021 |            | 0.8011 |     |     |                 |                 |
| 6     | V\$TATA_C  | 62     | 624 | (+) | NCTATAAAAR      | AGTTTAGAAA      |
| M0025 |            | 0.7926 |     |     |                 |                 |
| 2     | V\$TATA_01 | 92     | 625 | (+) | STATAAAWRNNNNNN | GTTTAGAAACCAAGA |
| M0021 |            | 0.8711 |     |     |                 |                 |
| 6     | V\$TATA_C  | 38     | 665 | (+) | NCTATAAAAR      | TCCTTATAAA      |
| M0025 |            | 0.7992 |     |     |                 |                 |
| 2     | V\$TATA_01 | 9      | 666 | (+) | STATAAAWRNNNNNN | CCTTATAAAGAACTT |
| M0021 |            | 0.7932 |     |     |                 |                 |
| 6     | V\$TATA_C  | 4      | 667 | (+) | NCTATAAAAR      | CTTATAAAGA      |
| M0025 |            | 0.8299 |     |     |                 |                 |
| 2     | V\$TATA_01 | 92     | 668 | (+) | STATAAAWRNNNNNN | TTATAAAGAAGCTGT |
| M0025 |            | 0.8221 |     |     |                 |                 |
| 2     | V\$TATA_01 | 26     | 754 | (+) | STATAAAWRNNNNNN | GTACAAATATAAATT |
| M0025 |            | 0.7815 |     |     |                 |                 |
| 2     | V\$TATA_01 | 28     | 758 | (+) | STATAAAWRNNNNNN | AAATATAAATTAATA |
| M0025 |            | 0.8414 |     |     |                 |                 |
| 2     | V\$TATA_01 | 11     | 760 | (+) | STATAAAWRNNNNNN | ATATAAATTAATATA |
| M0021 |            | 0.7847 |     |     |                 |                 |
| 6     | V\$TATA_C  | 9      | 769 | (+) | NCTATAAAAR      | AATATATAAT      |
| M0025 |            | 0.8302 |     |     |                 |                 |
| 2     | V\$TATA_01 | 46     | 770 | (+) | STATAAAWRNNNNNN | ATATATAATTAATGA |

|                    |             |          |      |     |                                     |                       |
|--------------------|-------------|----------|------|-----|-------------------------------------|-----------------------|
| M0025              |             | 0.8124   |      |     |                                     |                       |
| 2                  | V\$TATA_01  | 84       | 772  | (+) | STATAAAWRNNNNNN                     | ATATAATTAATGAGG       |
| M0021              |             | 0.7610   |      |     |                                     |                       |
| 6                  | V\$TATA_C   | 25       | 805  | (+) | NCTATAAAAR                          | ATTTCAAAAA            |
| M0021              |             | 0.7443   |      |     |                                     |                       |
| 6                  | V\$TATA_C   | 89       | 914  | (+) | NCTATAAAAR                          | AGCATGTAAG            |
| M0021              |             | 0.8249   |      |     |                                     |                       |
| 6                  | V\$TATA_C   | 27       | 922  | (+) | NCTATAAAAR                          | AGTATAATAA            |
| M0025              |             | 0.8434   |      |     |                                     |                       |
| 2                  | V\$TATA_01  | 41       | 923  | (+) | STATAAAWRNNNNNN                     | GTATAATAAGATATT       |
| M0025              |             | 0.8277   |      |     |                                     |                       |
| 2                  | V\$TATA_01  | 09       | 933  | (+) | STATAAAWRNNNNNN                     | ATATTTATAAGTACC       |
| M0021              |             | 0.7950   |      |     |                                     |                       |
| 6                  | V\$TATA_C   | 88       | 934  | (+) | NCTATAAAAR                          | TATTTATAAG            |
| M0025              |             | 0.8246   |      |     |                                     |                       |
| 2                  | V\$TATA_01  | 64       | 935  | (+) | STATAAAWRNNNNNN                     | ATTTATAAGTACCTC       |
| M0025              |             | 0.8208   |      |     |                                     |                       |
| 2                  | V\$TATA_01  | 58       | 937  | (+) | STATAAAWRNNNNNN                     | TTATAAGTACCTCCT       |
| M0025              |             | 0.7777   |      |     |                                     |                       |
| 2                  | V\$TATA_01  | 21       | 953  | (+) | STATAAAWRNNNNNN                     | TTATTTAAATATTAG       |
| M0025              |             | 0.7876   |      |     |                                     |                       |
| 2                  | V\$TATA_01  | 17       | 955  | (+) | STATAAAWRNNNNNN                     | ATTTAAATATTAGAA       |
| M0025              |             | 0.7888   |      |     |                                     |                       |
| 2                  | V\$TATA_01  | 86       | 961  | (+) | STATAAAWRNNNNNN                     | ATATTAGAAGAGTGA       |
| M0021              |             | 0.8077   |      |     |                                     |                       |
| 6                  | V\$TATA_C   | 63       | 1035 | (+) | NCTATAAAAR                          | CTTTTATAAT            |
| M0025              |             | 0.8079   |      |     |                                     |                       |
| 2                  | V\$TATA_01  | 17       | 1036 | (+) | STATAAAWRNNNNNN                     | TTTTATAATCAAAGA       |
| M0021              |             | 0.8064   |      |     |                                     |                       |
| 6                  | V\$TATA_C   | 43       | 1066 | (+) | NCTATAAAAR                          | CTTATACAAG            |
| M0022              |             | 0.8197   |      |     |                                     |                       |
| 3                  | V\$STAT_01  | 63       | 76   | (+) | TTCCCRKAA                           | TTCTCCAAA             |
| M0022              |             | 0.8006   |      |     |                                     |                       |
| 3                  | V\$STAT_01  | 05       | 317  | (+) | TTCCCRKAA                           | TTCTCCTTA             |
| M0022              |             | 0.8154   |      |     |                                     |                       |
| 3                  | V\$STAT_01  | 78       | 323  | (-) | TTCCCRKAA                           | TTATGAGGA             |
| M0022              |             | 0.8058   |      |     |                                     |                       |
| 3                  | V\$STAT_01  | 99       | 489  | (+) | TTCCCRKAA                           | TTACTGTAT             |
| M0022              |             | 0.7950   |      |     |                                     |                       |
| 3                  | V\$STAT_01  | 59       | 515  | (+) | TTCCCRKAA                           | TACCTGGCA             |
| M0022              |             | 0.8006   |      |     |                                     |                       |
| 3                  | V\$STAT_01  | 05       | 662  | (+) | TTCCCRKAA                           | TTCTCCTTA             |
| M0022              |             | 0.7302   |      |     |                                     |                       |
| 4                  | V\$STAT1_01 | 82       | 783  | (+) | NNNSANTTCGGGAANTGNSN                | GAGGAAATATGGGAAATATGT |
| M0022              |             | 0.8593   |      |     |                                     |                       |
| 3                  | V\$STAT_01  | 4        | 789  | (-) | TTCCCRKAA                           | ATATGGGAA             |
| M0022              |             | 0.8268   |      |     |                                     |                       |
| 3                  | V\$STAT_01  | 21       | 905  | (+) | TTCCCRKAA                           | TTCTTGCAA             |
| CSN2_Camelus ferus |             |          |      |     |                                     |                       |
| M00059             | V\$YY1_01   | 0.791284 | 8281 | (-) | NNNNNCCATNTWNNNWN<br>NNNCGGCCATCTT- | GTCCAGATATGACTTAA     |
| M00069             | V\$YY1_02   | 0.797037 | 8434 | (-) | GNCTSNW                             | AAGGCACAACATGGTGCATT  |
| M00059             | V\$YY1_01   | 0.805374 | 8436 | (-) | NNNNNCCATNTWNNNWN                   | GGCACAACATGGTGCAT     |
| M00059             | V\$YY1_01   | 0.774246 | 8437 | (+) | NNNNNCCATNTWNNNWN                   | GCACAACATGGTGCATT     |
| M00059             | V\$YY1_01   | 0.783748 | 8615 | (+) | NNNNNCCATNTWNNNWN                   | CAAAACGATTTTAAAT      |
| M00059             | V\$YY1_01   | 0.81291  | 8633 | (+) | NNNNNCCATNTWNNNWN                   | ACTCTCCATGGAAAAAA     |
| M00059             | V\$YY1_01   | 0.798493 | 8642 | (-) | NNNNNCCATNTWNNNWN                   | GGAAAAAATGAAACTG      |
| M00059             | V\$YY1_01   | 0.796199 | 8678 | (-) | NNNNNCCATNTWNNNWN                   | TGCTTTACATGGCACTC     |
| M00059             | V\$YY1_01   | 0.847969 | 8775 | (-) | NNNNNCCATNTWNNNWN                   | TATCAAAAATGTTTATA     |
| M00059             | V\$YY1_01   | 0.782438 | 8791 | (+) | NNNNNCCATNTWNNNWN                   | AAAAATCATTTGTGTAA     |
| M00223             | V\$STAT_01  | 0.822536 | 125  | (-) | TTCCCRKAA                           | TTCTGAGGA             |

|        |             |          |      |     |                            |                       |
|--------|-------------|----------|------|-----|----------------------------|-----------------------|
| M00223 | V\$STAT_01  | 0.878498 | 146  | (+) | TTCCCRKAA                  | TTATTGTAA             |
| M00223 | V\$STAT_01  | 0.826569 | 146  | (-) | TTCCCRKAA                  | TTATTGTAA             |
| M00223 | V\$STAT_01  | 0.792034 | 216  | (+) | TTCCCRKAA                  | TTCCATGAA             |
| M00223 | V\$STAT_01  | 0.8606   | 216  | (-) | TTCCCRKAA                  | TTCCATGAA             |
| M00223 | V\$STAT_01  | 0.805899 | 246  | (+) | TTCCCRKAA                  | TCACTGTAA             |
| M00223 | V\$STAT_01  | 0.79758  | 407  | (+) | TTCCCRKAA                  | TGCCCATCA             |
| M00223 | V\$STAT_01  | 0.815478 | 519  | (+) | TTCCCRKAA                  | TTCTCATAT             |
| M00223 | V\$STAT_01  | 0.812957 | 830  | (+) | TTCCCRKAA                  | TTACTGGAC             |
| M00223 | V\$STAT_01  | 0.866398 | 900  | (+) | TTCCCRKAA                  | TCCCCAGAA             |
| M00223 | V\$STAT_01  | 0.80489  | 900  | (-) | TTCCCRKAA                  | TCCCCAGAA             |
| M00223 | V\$STAT_01  | 0.80489  | 910  | (+) | TTCCCRKAA                  | TTCTGGGGA             |
| M00223 | V\$STAT_01  | 0.866398 | 910  | (-) | TTCCCRKAA                  | TTCTGGGGA             |
| M00223 | V\$STAT_01  | 0.790522 | 923  | (-) | TTCCCRKAA                  | TAATAAGAA             |
| M00224 | V\$STAT1_01 | 0.790219 | 951  | (+) | NNNSANTTCCGG-<br>GAANTGNSN | GTGGAATTCTGGAAATTCAAA |
| M00224 | V\$STAT1_01 | 0.756792 | 951  | (-) | NNNSANTTCCGG-<br>GAANTGNSN | GTGGAATTCTGGAAATTCAAA |
| M00225 | V\$STAT3_01 | 0.750326 | 951  | (+) | NGNNATTCCSG-<br>GAARTGNNN  | GTGGAATTCTGGAAATTCAAA |
| M00225 | V\$STAT3_01 | 0.743085 | 951  | (-) | NGNNATTCCSG-<br>GAARTGNNN  | GTGGAATTCTGGAAATTCAAA |
| M00223 | V\$STAT_01  | 0.81699  | 957  | (+) | TTCCCRKAA                  | TTCTGGAAA             |
| M00223 | V\$STAT_01  | 0.870179 | 957  | (-) | TTCCCRKAA                  | TTCTGGAAA             |
| M00223 | V\$STAT_01  | 0.802622 | 1242 | (-) | TTCCCRKAA                  | TTAGGTTAA             |
| M00223 | V\$STAT_01  | 0.843459 | 1276 | (-) | TTCCCRKAA                  | TGATAAGAA             |
| M00224 | V\$STAT1_01 | 0.744772 | 1382 | (+) | NNNSANTTCCGG-<br>GAANTGNSN | GATCAATTTCTTGAATTAAGT |
| M00223 | V\$STAT_01  | 0.799597 | 1590 | (+) | TTCCCRKAA                  | TTTTTAGAA             |
| M00223 | V\$STAT_01  | 0.888581 | 1593 | (-) | TTCCCRKAA                  | TTAGAAGAA             |
| M00223 | V\$STAT_01  | 0.856819 | 1762 | (-) | TTCCCRKAA                  | TTCCAGGAG             |
| M00223 | V\$STAT_01  | 0.843459 | 1967 | (-) | TTCCCRKAA                  | TGACGATAA             |
| M00223 | V\$STAT_01  | 0.846483 | 2003 | (-) | TTCCCRKAA                  | TTAGGGAAA             |
| M00223 | V\$STAT_01  | 0.792538 | 2158 | (+) | TTCCCRKAA                  | TTTTTATAA             |
| M00223 | V\$STAT_01  | 0.853542 | 2171 | (-) | TTCCCRKAA                  | TTACAGAAA             |
| M00223 | V\$STAT_01  | 0.815478 | 2773 | (+) | TTCCCRKAA                  | CTCTCATAA             |
| M00223 | V\$STAT_01  | 0.809932 | 2823 | (-) | TTCCCRKAA                  | TTAGCTGAA             |
| M00223 | V\$STAT_01  | 0.802622 | 2933 | (+) | TTCCCRKAA                  | TTTTCTTAA             |
| M00223 | V\$STAT_01  | 0.853542 | 2935 | (+) | TTCCCRKAA                  | TTCTAAAAA             |
| M00223 | V\$STAT_01  | 0.863625 | 2981 | (-) | TTCCCRKAA                  | TTAAAGGAA             |
| M00223 | V\$STAT_01  | 0.795815 | 3253 | (-) | TTCCCRKAA                  | TTCTAAGAT             |
| M00223 | V\$STAT_01  | 0.849761 | 3297 | (-) | TTCCCRKAA                  | TTACAGGAT             |
| M00223 | V\$STAT_01  | 0.849761 | 3352 | (-) | TTCCCRKAA                  | CTACAGGAA             |
| M00223 | V\$STAT_01  | 0.79884  | 3505 | (+) | TTCCCRKAA                  | TTACCCTAG             |
| M00223 | V\$STAT_01  | 0.822536 | 3585 | (+) | TTCCCRKAA                  | TACTCAGAA             |
| M00223 | V\$STAT_01  | 0.79758  | 3659 | (+) | TTCCCRKAA                  | TACCCATCA             |
| M00224 | V\$STAT1_01 | 0.75037  | 3673 | (-) | NNNSANTTCCGG-<br>GAANTGNSN | TCTTCATTGAGGTAAAATAAA |
| M00223 | V\$STAT_01  | 0.843711 | 3679 | (+) | TTCCCRKAA                  | TTCAGGTAA             |
| M00223 | V\$STAT_01  | 0.853542 | 3679 | (-) | TTCCCRKAA                  | TTCAGGTAA             |

|        |             |          |      |     |                            |                       |
|--------|-------------|----------|------|-----|----------------------------|-----------------------|
| M00223 | V\$STAT_01  | 0.826821 | 3782 | (+) | TTCCCRKAA                  | TTTCTCGAA             |
| M00223 | V\$STAT_01  | 0.833627 | 3936 | (+) | TTCCCRKAA                  | TTCAGAGAA             |
| M00223 | V\$STAT_01  | 0.853542 | 3936 | (-) | TTCCCRKAA                  | TTCAGAGAA             |
| M00223 | V\$STAT_01  | 0.79884  | 3983 | (-) | TTCCCRKAA                  | CTAGGAGAA             |
| M00223 | V\$STAT_01  | 0.819763 | 4084 | (+) | TTCCCRKAA                  | TTACCCAAA             |
| M00223 | V\$STAT_01  | 0.888581 | 4384 | (-) | TTCCCRKAA                  | TTAGAGTAA             |
| M00223 | V\$STAT_01  | 0.839677 | 4489 | (-) | TTCCCRKAA                  | ATCTAGGAA             |
| M00223 | V\$STAT_01  | 0.849761 | 4650 | (-) | TTCCCRKAA                  | TTACAGGAG             |
| M00223 | V\$STAT_01  | 0.861356 | 4722 | (+) | TTCCCRKAA                  | TTATTATAA             |
| M00223 | V\$STAT_01  | 0.819259 | 4785 | (+) | TTCCCRKAA                  | TTGTCATAA             |
| M00223 | V\$STAT_01  | 0.790522 | 4788 | (-) | TTCCCRKAA                  | TCATAAGAA             |
| M00223 | V\$STAT_01  | 0.826317 | 5108 | (+) | TTCCCRKAA                  | TTTTCAGAA             |
| M00223 | V\$STAT_01  | 0.799849 | 5108 | (-) | TTCCCRKAA                  | TTTTCAGAA             |
| M00223 | V\$STAT_01  | 0.826317 | 5171 | (+) | TTCCCRKAA                  | TTAGCAGAA             |
| M00223 | V\$STAT_01  | 0.87875  | 5171 | (-) | TTCCCRKAA                  | TTAGCAGAA             |
| M00223 | V\$STAT_01  | 0.895387 | 5229 | (+) | TTCCCRKAA                  | TTACGATAA             |
| M00223 | V\$STAT_01  | 0.905218 | 5229 | (-) | TTCCCRKAA                  | TTACGATAA             |
| M00223 | V\$STAT_01  | 0.832619 | 5330 | (-) | TTCCCRKAA                  | GTATAGGAA             |
| M00223 | V\$STAT_01  | 0.799597 | 5487 | (+) | TTCCCRKAA                  | TTAGTAGAA             |
| M00223 | V\$STAT_01  | 0.809932 | 5487 | (-) | TTCCCRKAA                  | TTAGTAGAA             |
| M00223 | V\$STAT_01  | 0.8243   | 5528 | (+) | TTCCCRKAA                  | TTCTCAGGA             |
| M00223 | V\$STAT_01  | 0.815478 | 5662 | (+) | TTCCCRKAA                  | TACTCATAA             |
| M00223 | V\$STAT_01  | 0.80968  | 5694 | (-) | TTCCCRKAA                  | TTACATTAA             |
| M00223 | V\$STAT_01  | 0.853542 | 5899 | (+) | TTCCCRKAA                  | TTGCTGTAA             |
| M00223 | V\$STAT_01  | 0.817242 | 6470 | (-) | TTCCCRKAA                  | TAATGAGAA             |
| M00223 | V\$STAT_01  | 0.856819 | 6661 | (-) | TTCCCRKAA                  | TTCCAGGAT             |
| M00223 | V\$STAT_01  | 0.79884  | 6741 | (+) | TTCCCRKAA                  | TTACCCTAT             |
| M00224 | V\$STAT1_01 | 0.727812 | 6890 | (+) | NNNSANTTCCGG-<br>GAANTGNSN | TGCCCTTTACTGAAAGCCAGA |
| M00224 | V\$STAT1_01 | 0.729788 | 6890 | (-) | NNNSANTTCCGG-<br>GAANTGNSN | TGCCCTTTACTGAAAGCCAGA |
| M00223 | V\$STAT_01  | 0.826821 | 6896 | (+) | TTCCCRKAA                  | TTACTGAAA             |
| M00223 | V\$STAT_01  | 0.804638 | 7059 | (+) | TTCCCRKAA                  | TCCCCAGCA             |
| M00223 | V\$STAT_01  | 0.856819 | 7117 | (-) | TTCCCRKAA                  | TTCCAGGAG             |
| M00223 | V\$STAT_01  | 0.844719 | 7238 | (-) | TTCCCRKAA                  | TTAGAATAA             |
| M00223 | V\$STAT_01  | 0.81699  | 7452 | (-) | TTCCCRKAA                  | TGAGCAGAA             |
| M00223 | V\$STAT_01  | 0.8364   | 7592 | (+) | TTCCCRKAA                  | TTTCTATAA             |
| M00223 | V\$STAT_01  | 0.846483 | 7722 | (-) | TTCCCRKAA                  | TTAGGGAAA             |
| M00223 | V\$STAT_01  | 0.843459 | 7734 | (+) | TTCCCRKAA                  | TTCTTATCA             |
| M00223 | V\$STAT_01  | 0.792538 | 7737 | (+) | TTCCCRKAA                  | TTATCAAAA             |
| M00224 | V\$STAT1_01 | 0.736539 | 7817 | (-) | NNNSANTTCCGG-<br>GAANTGNSN | CCTCACTTTTGGTAAGCTTTA |
| M00223 | V\$STAT_01  | 0.799849 | 7823 | (+) | TTCCCRKAA                  | TTTTGGTAA             |
| M00223 | V\$STAT_01  | 0.8364   | 7823 | (-) | TTCCCRKAA                  | TTTTGGTAA             |
| M00223 | V\$STAT_01  | 0.805899 | 7865 | (-) | TTCCCRKAA                  | TTACAGTTA             |
| M00223 | V\$STAT_01  | 0.853542 | 8108 | (-) | TTCCCRKAA                  | TTTTAGGAA             |
| M00223 | V\$STAT_01  | 0.802622 | 8110 | (-) | TTCCCRKAA                  | TTAGGAAAA             |
| M00223 | V\$STAT_01  | 0.815982 | 8405 | (-) | TTCCCRKAA                  | CTAGAGGAA             |

|                    |             |          |      |     |                       |                       |
|--------------------|-------------|----------|------|-----|-----------------------|-----------------------|
| M00225             | V\$STAT3_01 | 0.711224 | 8550 | (+) | NGNNATTCCSG-GAARTGNNN | CTCTATTCCACAGAATTGACT |
| M00225             | V\$STAT3_01 | 0.712527 | 8550 | (-) | NGNNATTCCSG-GAARTGNNN | CTCTATTCCACAGAATTGACT |
| M00223             | V\$STAT_01  | 0.8364   | 8611 | (+) | TTCCCRKAA             | TTACCAAAA             |
| M00223             | V\$STAT_01  | 0.799849 | 8611 | (-) | TTCCCRKAA             | TTACCAAAA             |
| M00223             | V\$STAT_01  | 0.815478 | 8763 | (+) | TTCCCRKAA             | ATACCATAA             |
| M00223             | V\$STAT_01  | 0.792538 | 8774 | (+) | TTCCCRKAA             | TTATCAAAA             |
| M00223             | V\$STAT_01  | 0.792538 | 8787 | (-) | TTCCCRKAA             | TTATAAAAA             |
| CSN3_Camelus ferus |             |          |      |     |                       |                       |
| M0012              |             | 0.82116  |      |     |                       |                       |
| 7                  | V\$GATA1_03 | 6        | 6    | (-) | RNSNNGATAANNNGN       | TCTCTTTTCAAGCT        |
| M0012              |             |          |      |     |                       |                       |
| 7                  | V\$GATA1_03 | 0.78001  | 16   | (+) | RNSNNGATAANNNGN       | AGCTTTATAAATGA        |
| M0012              |             | 0.80450  |      |     |                       |                       |
| 7                  | V\$GATA1_03 | 8        | 41   | (-) | RNSNNGATAANNNGN       | CCTCCTATGCACTT        |
| M0007              |             | 0.79269  |      |     |                       |                       |
| 5                  | V\$GATA1_01 | 5        | 74   | (+) | SNNGATNNNN            | AAAGATGACT            |
| M0007              |             | 0.83761  |      |     |                       |                       |
| 6                  | V\$GATA2_01 | 8        | 74   | (+) | NNNGATRNNN            | AAAGATGACT            |
| M0012              |             | 0.84968  |      |     |                       |                       |
| 6                  | V\$GATA1_02 | 8        | 83   | (-) | NNNNNGATANKGNN        | TCTGCTATCGTCAA        |
| M0007              |             | 0.90177  |      |     |                       |                       |
| 5                  | V\$GATA1_01 | 7        | 85   | (-) | SNNGATNNNN            | TGCTATCGTC            |
| M0007              |             | 0.93143  |      |     |                       |                       |
| 6                  | V\$GATA2_01 | 9        | 85   | (-) | NNNGATRNNN            | TGCTATCGTC            |
| M0007              |             | 0.88125  |      |     |                       |                       |
| 7                  | V\$GATA3_01 | 8        | 85   | (-) | NNGATARNG             | TGCTATCGT             |
| M0007              |             | 0.85378  |      |     |                       |                       |
| 7                  | V\$GATA3_01 | 8        | 93   | (-) | NNGATARNG             | TCAAATCTT             |
| M0012              |             | 0.79201  |      |     |                       |                       |
| 7                  | V\$GATA1_03 | 4        | 104  | (-) | RNSNNGATAANNNGN       | CTTTTGTGTCATCTT       |
| M0012              |             | 0.84345  |      |     |                       |                       |
| 7                  | V\$GATA1_03 | 9        | 107  | (-) | RNSNNGATAANNNGN       | TTTGTGTCATCTTCCT      |
| M0007              |             | 0.82181  |      |     |                       |                       |
| 5                  | V\$GATA1_01 | 6        | 109  | (-) | SNNGATNNNN            | TGTCATCTTC            |
| M0007              |             | 0.85475  |      |     |                       |                       |
| 6                  | V\$GATA2_01 | 9        | 109  | (-) | NNNGATRNNN            | TGTCATCTTC            |
| M0007              |             | 0.82897  |      |     |                       |                       |
| 7                  | V\$GATA3_01 | 7        | 109  | (-) | NNGATARNG             | TGTCATCTT             |
| M0012              |             | 0.77062  |      |     |                       |                       |
| 6                  | V\$GATA1_02 | 5        | 138  | (+) | NNNNNGATANKGNN        | AGGAAGATAAATCA        |
| M0012              |             | 0.89049  |      |     |                       |                       |
| 7                  | V\$GATA1_03 | 5        | 138  | (+) | RNSNNGATAANNNGN       | AGGAAGATAAATCA        |
| M0012              |             | 0.89644  |      |     |                       |                       |
| 8                  | V\$GATA1_04 | 6        | 139  | (+) | NNCWGATARNNNN         | GGAAGATAAATCA         |
| M0007              |             | 0.81786  |      |     |                       |                       |
| 5                  | V\$GATA1_01 | 8        | 140  | (+) | SNNGATNNNN            | GAAGATAAAT            |
| M0007              |             | 0.85385  |      |     |                       |                       |
| 6                  | V\$GATA2_01 | 7        | 140  | (+) | NNNGATRNNN            | GAAGATAAAT            |
| M0007              |             | 0.84669  |      |     |                       |                       |
| 7                  | V\$GATA3_01 | 9        | 141  | (+) | NNGATARNG             | AAGATAAAT             |
| M0020              |             | 0.94346  |      |     |                       |                       |
| 3                  | V\$GATA_C   | 1        | 142  | (+) | NGATAAGNMNN           | AGATAAATCAC           |
| M0007              |             | 0.80552  |      |     |                       |                       |
| 5                  | V\$GATA1_01 | 8        | 144  | (-) | SNNGATNNNN            | ATAAATCACA            |
| M0007              |             | 0.78664  |      |     |                       |                       |
| 6                  | V\$GATA2_01 | 9        | 144  | (-) | NNNGATRNNN            | ATAAATCACA            |
| M0007              |             | 0.79070  |      |     |                       |                       |
| 6                  | V\$GATA2_01 | 8        | 149  | (+) | NNNGATRNNN            | TCACATGCTG            |
| M0007              |             | 0.83563  |      |     |                       |                       |
| 5                  | V\$GATA1_01 | 7        | 164  | (-) | SNNGATNNNN            | CACTAACACC            |
| M0007              |             |          |      |     |                       |                       |
| 6                  | V\$GATA2_01 | 0.79567  | 164  | (-) | NNNGATRNNN            | CACTAACACC            |

|       |             |         |     |     |                 |                |
|-------|-------------|---------|-----|-----|-----------------|----------------|
| M0012 |             | 0.85448 |     |     |                 |                |
| 7     | V\$GATA1_03 | 3       | 187 | (-) | RNSNNGATAANNNGN | CCAGTTATTTACCT |
| M0007 |             | 0.79318 |     |     |                 |                |
| 5     | V\$GATA1_01 | 9       | 251 | (+) | SNNGATNNNN      | CCTGACAGGC     |
| M0020 |             | 0.83317 |     |     |                 |                |
| 3     | V\$GATA_C   | 8       | 253 | (+) | NGATAAGNMNN     | TGACAGGCACA    |
| M0012 |             | 0.82680 |     |     |                 |                |
| 7     | V\$GATA1_03 | 1       | 265 | (+) | RNSNNGATAANNNGN | GGGAAGGTAATCAA |
| M0007 |             | 0.82676 |     |     |                 |                |
| 7     | V\$GATA3_01 | 1       | 292 | (+) | NNGATARNG       | GAGAGAATG      |
| M0012 |             | 0.78466 |     |     |                 |                |
| 7     | V\$GATA1_03 | 4       | 312 | (+) | RNSNNGATAANNNGN | CAGGAGTTAATCAT |
| M0007 |             | 0.81737 |     |     |                 |                |
| 5     | V\$GATA1_01 | 4       | 369 | (-) | SNNGATNNNN      | TGGCATCATT     |
| M0007 |             | 0.82273 |     |     |                 |                |
| 6     | V\$GATA2_01 | 3       | 369 | (-) | NNNGATRNNN      | TGGCATCATT     |
| M0007 |             | 0.79220 |     |     |                 |                |
| 5     | V\$GATA1_01 | 1       | 404 | (+) | SNNGATNNNN      | TTAGATTCTG     |
| M0007 |             | 0.82454 |     |     |                 |                |
| 7     | V\$GATA3_01 | 6       | 405 | (+) | NNGATARNG       | TAGATTCTG      |
| M0007 |             | 0.82144 |     |     |                 |                |
| 7     | V\$GATA3_01 | 4       | 423 | (+) | NNGATARNG       | ATGATTAAA      |
| M0012 |             | 0.78515 |     |     |                 |                |
| 7     | V\$GATA1_03 | 4       | 435 | (-) | RNSNNGATAANNNGN | ATTTTAACTTCAC  |
| M0007 |             | 0.81010 |     |     |                 |                |
| 6     | V\$GATA2_01 | 4       | 545 | (-) | NNNGATRNNN      | ACATATGTGG     |
| M0007 |             | 0.80108 |     |     |                 |                |
| 6     | V\$GATA2_01 | 3       | 557 | (-) | NNNGATRNNN      | GGCTAACTTC     |
| M0012 |             | 0.78980 |     |     |                 |                |
| 7     | V\$GATA1_03 | 9       | 569 | (+) | RNSNNGATAANNNGN | AGAAAGATGAATGT |
| M0007 |             | 0.79763 |     |     |                 |                |
| 5     | V\$GATA1_01 | 1       | 588 | (-) | SNNGATNNNN      | AATAATCCAG     |
| M0020 |             | 0.89655 |     |     |                 |                |
| 3     | V\$GATA_C   | 2       | 626 | (-) | NGATAAGNMNN     | TATTTCTATCT    |
| M0012 |             |         |     |     |                 |                |
| 6     | V\$GATA1_02 | 0.80375 | 627 | (-) | NNNNNGATANKGNN  | ATTCTATCTAAAG  |
| M0012 |             | 0.86948 |     |     |                 |                |
| 8     | V\$GATA1_04 | 5       | 627 | (-) | NNCWGATARNNNN   | ATTCTATCTAAA   |
| M0007 |             | 0.88258 |     |     |                 |                |
| 7     | V\$GATA3_01 | 8       | 629 | (-) | NNGATARNG       | TTCTATCTA      |
| M0007 |             | 0.86486 |     |     |                 |                |
| 7     | V\$GATA3_01 | 5       | 638 | (+) | NNGATARNG       | AAGATTATA      |
| M0020 |             | 0.87853 |     |     |                 |                |
| 3     | V\$GATA_C   | 4       | 686 | (-) | NGATAAGNMNN     | GTTACATATCC    |
| M0012 |             | 0.80769 |     |     |                 |                |
| 7     | V\$GATA1_03 | 2       | 687 | (-) | RNSNNGATAANNNGN | TTACATATCCTCAC |
| M0007 |             | 0.88351 |     |     |                 |                |
| 5     | V\$GATA1_01 | 4       | 689 | (-) | SNNGATNNNN      | ACATATCCTC     |
| M0007 |             | 0.92963 |     |     |                 |                |
| 6     | V\$GATA2_01 | 5       | 689 | (-) | NNNGATRNNN      | ACATATCCTC     |
| M0007 |             | 0.83662 |     |     |                 |                |
| 5     | V\$GATA1_01 | 4       | 734 | (-) | SNNGATNNNN      | TTCCATCAAG     |
| M0007 |             |         |     |     |                 |                |
| 6     | V\$GATA2_01 | 0.78304 | 771 | (-) | NNNGATRNNN      | AATTATGGTC     |
| M0020 |             | 0.98726 |     |     |                 |                |
| 3     | V\$GATA_C   | 3       | 776 | (-) | NGATAAGNMNN     | TGGTCTTATCT    |
| M0012 |             | 0.85062 |     |     |                 |                |
| 6     | V\$GATA1_02 | 5       | 777 | (-) | NNNNNGATANKGNN  | GGTCTTATCTCTCT |
| M0012 |             | 0.91499 |     |     |                 |                |
| 7     | V\$GATA1_03 | 3       | 777 | (-) | RNSNNGATAANNNGN | GGTCTTATCTCTCT |
| M0012 |             | 0.92800 |     |     |                 |                |
| 8     | V\$GATA1_04 | 2       | 777 | (-) | NNCWGATARNNNN   | GGTCTTATCTCTC  |
| M0007 |             | 0.79812 |     |     |                 |                |
| 5     | V\$GATA1_01 | 4       | 779 | (-) | SNNGATNNNN      | TCTTATCTCT     |
| M0007 |             | 0.83175 |     |     |                 |                |
| 6     | V\$GATA2_01 | 5       | 779 | (-) | NNNGATRNNN      | TCTTATCTCT     |

|       |             |         |     |     |                |                |
|-------|-------------|---------|-----|-----|----------------|----------------|
| M0007 |             | 0.93664 |     |     |                |                |
| 7     | V\$GATA3_01 | 2       | 779 | (-) | NNGATARNG      | TCTTATCTC      |
| M0007 |             | 0.83711 |     |     |                |                |
| 5     | V\$GATA1_01 | 7       | 788 | (+) | SNNGATNNNN     | TCTGATTCT      |
| M0007 |             | 0.84573 |     |     |                |                |
| 6     | V\$GATA2_01 | 7       | 788 | (+) | NNNGATRNNN     | TCTGATTCT      |
| M0007 |             | 0.79466 |     |     |                |                |
| 5     | V\$GATA1_01 | 9       | 813 | (-) | SNNGATNNNN     | GAGGATCTAC     |
| M0007 |             | 0.81506 |     |     |                |                |
| 6     | V\$GATA2_01 | 5       | 813 | (+) | NNNGATRNNN     | GAGGATCTAC     |
| M0007 |             | 0.85488 |     |     |                |                |
| 5     | V\$GATA1_01 | 6       | 832 | (+) | SNNGATNNNN     | ACAGATTGCT     |
| M0007 |             | 0.86107 |     |     |                |                |
| 6     | V\$GATA2_01 | 4       | 832 | (+) | NNNGATRNNN     | ACAGATTGCT     |
| M0007 |             |         |     |     |                |                |
| 7     | V\$GATA3_01 | 0.83961 | 833 | (+) | NNGATARNG      | CAGATTGCT      |
| M0007 |             | 0.81490 |     |     |                |                |
| 5     | V\$GATA1_01 | 6       | 895 | (-) | SNNGATNNNN     | AAACATCCTA     |
| M0007 |             | 0.88046 |     |     |                |                |
| 6     | V\$GATA2_01 | 9       | 895 | (-) | NNNGATRNNN     | AAACATCCTA     |
| M0007 |             | 0.84889 |     |     |                |                |
| 6     | V\$GATA2_01 | 5       | 907 | (-) | NNNGATRNNN     | AGAGATCTTA     |
| M0012 |             | 0.83812 |     |     |                |                |
| 6     | V\$GATA1_02 | 5       | 937 | (+) | NNNNNGATANKGNN | GAAATGATAATTAT |
| M0012 |             | 0.85521 |     |     |                |                |
| 7     | V\$GATA1_03 | 8       | 937 | (+) | RNSNNGATAANNGN | GAAATGATAATTAT |
| M0012 |             | 0.88541 |     |     |                |                |
| 8     | V\$GATA1_04 | 7       | 938 | (+) | NNCWGATARNNNN  | AAATGATAATTAT  |
| M0007 |             | 0.81342 |     |     |                |                |
| 5     | V\$GATA1_01 | 5       | 939 | (+) | SNNGATNNNN     | AATGATAATT     |
| M0007 |             | 0.83581 |     |     |                |                |
| 6     | V\$GATA2_01 | 4       | 939 | (+) | NNNGATRNNN     | AATGATAATT     |
| M0007 |             | 0.84315 |     |     |                |                |
| 7     | V\$GATA3_01 | 5       | 940 | (+) | NNGATARNG      | ATGATAATT      |
| M0020 |             | 0.85119 |     |     |                |                |
| 3     | V\$GATA_C   | 6       | 941 | (+) | NGATAAGNMNN    | TGATAATTATG    |
| M0012 |             | 0.87187 |     |     |                |                |
| 6     | V\$GATA1_02 | 5       | 953 | (+) | NNNNNGATANKGNN | GACATGATAGAAGT |
| M0012 |             | 0.85252 |     |     |                |                |
| 7     | V\$GATA1_03 | 3       | 953 | (+) | RNSNNGATAANNGN | GACATGATAGAAGT |
| M0012 |             | 0.90226 |     |     |                |                |
| 8     | V\$GATA1_04 | 7       | 954 | (+) | NNCWGATARNNNN  | ACATGATAGAAGT  |
| M0007 |             | 0.87265 |     |     |                |                |
| 5     | V\$GATA1_01 | 5       | 955 | (+) | SNNGATNNNN     | CATGATAGAA     |
| M0007 |             | 0.85881 |     |     |                |                |
| 6     | V\$GATA2_01 | 8       | 955 | (+) | NNNGATRNNN     | CATGATAGAA     |
| M0007 |             | 0.88347 |     |     |                |                |
| 7     | V\$GATA3_01 | 4       | 956 | (+) | NNGATARNG      | ATGATAGAA      |
| M0020 |             | 0.89468 |     |     |                |                |
| 3     | V\$GATA_C   | 8       | 967 | (-) | NGATAAGNMNN    | GGTAATTATCA    |
| M0012 |             | 0.84031 |     |     |                |                |
| 6     | V\$GATA1_02 | 3       | 968 | (-) | NNNNNGATANKGNN | GTAATTATCACTAC |
| M0012 |             | 0.88755 |     |     |                |                |
| 7     | V\$GATA1_03 | 5       | 968 | (-) | RNSNNGATAANNGN | GTAATTATCACTAC |
| M0012 |             | 0.87009 |     |     |                |                |
| 8     | V\$GATA1_04 | 8       | 968 | (-) | NNCWGATARNNNN  | GTAATTATCACTA  |
| M0007 |             | 0.84205 |     |     |                |                |
| 5     | V\$GATA1_01 | 3       | 970 | (-) | SNNGATNNNN     | AATTATCACT     |
| M0007 |             | 0.84393 |     |     |                |                |
| 6     | V\$GATA2_01 | 3       | 970 | (-) | NNNGATRNNN     | AATTATCACT     |
| M0007 |             | 0.86043 |     |     |                |                |
| 7     | V\$GATA3_01 | 4       | 970 | (-) | NNGATARNG      | AATTATCAC      |
| M0007 |             | 0.87709 |     |     |                |                |
| 5     | V\$GATA1_01 | 8       | 985 | (-) | SNNGATNNNN     | GGCAATCACA     |
| M0007 |             | 0.87866 |     |     |                |                |
| 6     | V\$GATA2_01 | 5       | 985 | (-) | NNNGATRNNN     | GGCAATCACA     |

|       |             |         |      |     |                |                |
|-------|-------------|---------|------|-----|----------------|----------------|
| M0007 |             | 0.83916 |      |     |                |                |
| 7     | V\$GATA3_01 | 7       | 985  | (-) | NNGATARNG      | GGCAATCAC      |
| M0007 |             | 0.81342 |      |     |                |                |
| 5     | V\$GATA1_01 | 5       | 1013 | (-) | SNNGATNNNN     | TCAAATCAAC     |
| M0012 |             | 0.78564 |      |     |                |                |
| 7     | V\$GATA1_03 | 4       | 1047 | (-) | RNSNNGATAANNGN | AATGTTATATGTCT |
| M0012 |             | 0.81185 |      |     |                |                |
| 7     | V\$GATA1_03 | 7       | 1084 | (+) | RNSNNGATAANNGN | AAAAAGGTAAGTGG |
| M0007 |             | 0.77443 |      |     |                |                |
| 5     | V\$GATA1_01 | 2       | 1088 | (-) | SNNGATNNNN     | AGGTAAGTGG     |
| M0007 |             | 0.78213 |      |     |                |                |
| 6     | V\$GATA2_01 | 8       | 1088 | (-) | NNNGATRNNN     | AGGTAAGTGG     |
| M0012 |             | 0.77531 |      |     |                |                |
| 6     | V\$GATA1_02 | 3       | 1106 | (+) | NNNNNGATANKGNN | GAATTAATAGGGAA |
| M0007 |             | 0.79431 |      |     |                |                |
| 6     | V\$GATA2_01 | 7       | 1153 | (-) | NNNGATRNNN     | GTAGATCTCA     |
| M0007 |             | 0.81688 |      |     |                |                |
| 5     | V\$GATA1_01 | 1       | 1182 | (+) | SNNGATNNNN     | AATGATATCC     |
| M0007 |             | 0.86603 |      |     |                |                |
| 6     | V\$GATA2_01 | 5       | 1182 | (+) | NNNGATRNNN     | AATGATATCC     |
| M0007 |             | 0.77936 |      |     |                |                |
| 5     | V\$GATA1_01 | 8       | 1184 | (-) | SNNGATNNNN     | TGATATCCTA     |
| M0007 |             |         |      |     |                |                |
| 6     | V\$GATA2_01 | 0.89806 | 1184 | (-) | NNNGATRNNN     | TGATATCCTA     |
| M0020 |             |         |      |     |                |                |
| 3     | V\$GATA_C   | 0.88164 | 1186 | (-) | NGATAAGNMNN    | ATATCCTATCA    |
| M0012 |             | 0.82968 |      |     |                |                |
| 6     | V\$GATA1_02 | 8       | 1187 | (-) | NNNNNGATANKGNN | TATCCTATCAGAGG |
| M0012 |             |         |      |     |                |                |
| 8     | V\$GATA1_04 | 0.83364 | 1187 | (-) | NNCWGATARNNNN  | TATCCTATCAGAG  |
| M0007 |             | 0.88450 |      |     |                |                |
| 5     | V\$GATA1_01 | 1       | 1189 | (-) | SNNGATNNNN     | TCCTATCAGA     |
| M0007 |             | 0.90437 |      |     |                |                |
| 6     | V\$GATA2_01 | 5       | 1189 | (-) | NNNGATRNNN     | TCCTATCAGA     |
| M0007 |             | 0.91847 |      |     |                |                |
| 7     | V\$GATA3_01 | 6       | 1189 | (-) | NNGATARNG      | TCCTATCAG      |
| M0007 |             | 0.79318 |      |     |                |                |
| 5     | V\$GATA1_01 | 9       | 1204 | (-) | SNNGATNNNN     | TGAAATCAGT     |
| M0007 |             | 0.78349 |      |     |                |                |
| 6     | V\$GATA2_01 | 1       | 1204 | (-) | NNNGATRNNN     | TGAAATCAGT     |
| M0012 |             | 0.79103 |      |     |                |                |
| 7     | V\$GATA1_03 | 4       | 1227 | (-) | RNSNNGATAANNGN | TTTCTAATCATTAT |
| M0007 |             | 0.86220 |      |     |                |                |
| 7     | V\$GATA3_01 | 6       | 1229 | (-) | NNGATARNG      | TCTAATCAT      |
| M0020 |             | 0.86082 |      |     |                |                |
| 3     | V\$GATA_C   | 6       | 1235 | (-) | NGATAAGNMNN    | CATTATTATCT    |
| M0012 |             | 0.85843 |      |     |                |                |
| 6     | V\$GATA1_02 | 8       | 1236 | (-) | NNNNNGATANKGNN | ATTATTATCTGTGA |
| M0012 |             | 0.79127 |      |     |                |                |
| 7     | V\$GATA1_03 | 9       | 1236 | (-) | RNSNNGATAANNGN | ATTATTATCTGTGA |
| M0012 |             | 0.84926 |      |     |                |                |
| 8     | V\$GATA1_04 | 5       | 1236 | (-) | NNCWGATARNNNN  | ATTATTATCTGTG  |
| M0007 |             | 0.77788 |      |     |                |                |
| 5     | V\$GATA1_01 | 7       | 1238 | (-) | SNNGATNNNN     | TATTATCTGT     |
| M0007 |             |         |      |     |                |                |
| 6     | V\$GATA2_01 | 0.82544 | 1238 | (-) | NNNGATRNNN     | TATTATCTGT     |
| M0007 |             | 0.89277 |      |     |                |                |
| 7     | V\$GATA3_01 | 8       | 1238 | (-) | NNGATARNG      | TATTATCTG      |
| M0012 |             | 0.78882 |      |     |                |                |
| 7     | V\$GATA1_03 | 9       | 1278 | (-) | RNSNNGATAANNGN | CCCTTTACCAAGCC |
| M0012 |             | 0.78218 |      |     |                |                |
| 6     | V\$GATA1_02 | 7       | 1308 | (-) | NNNNNGATANKGNN | GACCCTCTCTTGTA |
| M0007 |             | 0.77788 |      |     |                |                |
| 5     | V\$GATA1_01 | 7       | 1310 | (-) | SNNGATNNNN     | CCCTCTCTTG     |
| M0007 |             | 0.85866 |      |     |                |                |
| 7     | V\$GATA3_01 | 2       | 1310 | (-) | NNGATARNG      | CCCTCTCTT      |



|       |             |         |      |     |                |                |
|-------|-------------|---------|------|-----|----------------|----------------|
| M0007 |             |         |      |     |                |                |
| 7     | V\$GATA3_01 | 0.82942 | 1340 | (-) | NNGATARNG      | TCAAATCTA      |
| M0007 |             | 0.90375 |      |     |                |                |
| 5     | V\$GATA1_01 | 1       | 1378 | (+) | SNNGATNNNN     | CAAGATGTGG     |
| M0007 |             | 0.89445 |      |     |                |                |
| 6     | V\$GATA2_01 | 2       | 1378 | (+) | NNNGATRNNN     | CAAGATGTGG     |
| M0007 |             | 0.86885 |      |     |                |                |
| 7     | V\$GATA3_01 | 2       | 1379 | (+) | NNGATARNG      | AAGATGTGG      |
| M0012 |             | 0.82116 |      |     |                |                |
| 7     | V\$GATA1_03 | 6       | 1438 | (-) | RNSNNGATAANNGN | ACTGTTATATGTAT |
| M0020 |             | 0.88008 |      |     |                |                |
| 3     | V\$GATA_C   | 7       | 1443 | (-) | NGATAAGNMNN    | TATATGTATCT    |
| M0012 |             |         |      |     |                |                |
| 7     | V\$GATA1_03 | 0.83415 | 1444 | (-) | RNSNNGATAANNGN | ATATGTATCTTTCT |
| M0012 |             | 0.81770 |      |     |                |                |
| 8     | V\$GATA1_04 | 8       | 1444 | (-) | NNCWGATARNNNN  | ATATGTATCTTTC  |
| M0007 |             | 0.79269 |      |     |                |                |
| 5     | V\$GATA1_01 | 5       | 1446 | (-) | SNNGATNNNN     | ATGTATCTTT     |
| M0007 |             | 0.83310 |      |     |                |                |
| 6     | V\$GATA2_01 | 8       | 1446 | (-) | NNNGATRNNN     | ATGTATCTTT     |
| M0007 |             | 0.78035 |      |     |                |                |
| 5     | V\$GATA1_01 | 5       | 1474 | (-) | SNNGATNNNN     | AAAAATCAAA     |
| M0012 |             | 0.83272 |      |     |                |                |
| 8     | V\$GATA1_04 | 1       | 1478 | (+) | NNCWGATARNNNN  | ATCAAATAAGCAG  |
| M0012 |             | 0.83047 |      |     |                |                |
| 7     | V\$GATA1_03 | 5       | 1496 | (-) | RNSNNGATAANNGN | ACTCCTATACTCCT |
| M0012 |             | 0.89343 |      |     |                |                |
| 6     | V\$GATA1_02 | 7       | 1512 | (+) | NNNNNGATANKGN  | AGAAAGATAAGGCT |
| M0012 |             | 0.89882 |      |     |                |                |
| 7     | V\$GATA1_03 | 4       | 1512 | (+) | RNSNNGATAANNGN | AGAAAGATAAGGCT |
| M0012 |             | 0.94362 |      |     |                |                |
| 8     | V\$GATA1_04 | 7       | 1513 | (+) | NNCWGATARNNNN  | GAAAGATAAGGCT  |
| M0007 |             | 0.81638 |      |     |                |                |
| 5     | V\$GATA1_01 | 7       | 1514 | (+) | SNNGATNNNN     | AAAGATAAGG     |
| M0007 |             | 0.86648 |      |     |                |                |
| 6     | V\$GATA2_01 | 6       | 1514 | (+) | NNNGATRNNN     | AAAGATAAGG     |
| M0007 |             | 0.95436 |      |     |                |                |
| 7     | V\$GATA3_01 | 4       | 1515 | (+) | NNGATARNG      | AAGATAAGG      |
| M0020 |             | 0.97732 |      |     |                |                |
| 3     | V\$GATA_C   | 2       | 1516 | (+) | NGATAAGNMNN    | AGATAAGGCTA    |
| M0020 |             |         |      |     |                |                |
| 3     | V\$GATA_C   | 0.84343 | 1553 | (-) | NGATAAGNMNN    | AAGCCCTGTCA    |
| M0007 |             | 0.81371 |      |     |                |                |
| 6     | V\$GATA2_01 | 2       | 1565 | (+) | NNNGATRNNN     | TGTCATACCT     |
| M0007 |             | 0.79702 |      |     |                |                |
| 6     | V\$GATA2_01 | 3       | 1571 | (-) | NNNGATRNNN     | ACCTATGTTT     |
| M0007 |             | 0.88795 |      |     |                |                |
| 5     | V\$GATA1_01 | 7       | 1588 | (-) | SNNGATNNNN     | AACAATCAAG     |
| M0007 |             | 0.78258 |      |     |                |                |
| 6     | V\$GATA2_01 | 9       | 1588 | (-) | NNNGATRNNN     | AACAATCAAG     |
| M0012 |             | 0.80818 |      |     |                |                |
| 7     | V\$GATA1_03 | 2       | 1592 | (+) | RNSNNGATAANNGN | ATCAAGTTAATCTC |
| M0007 |             | 0.83030 |      |     |                |                |
| 7     | V\$GATA3_01 | 6       | 1597 | (-) | NNGATARNG      | GTTAATCTC      |
| M0007 |             | 0.79022 |      |     |                |                |
| 5     | V\$GATA1_01 | 7       | 1602 | (-) | SNNGATNNNN     | TCTCATCATT     |
| M0007 |             | 0.78394 |      |     |                |                |
| 6     | V\$GATA2_01 | 2       | 1602 | (-) | NNNGATRNNN     | TCTCATCATT     |
| M0007 |             | 0.84226 |      |     |                |                |
| 7     | V\$GATA3_01 | 8       | 1602 | (-) | NNGATARNG      | TCTCATCAT      |
| M0007 |             | 0.88252 |      |     |                |                |
| 5     | V\$GATA1_01 | 7       | 1612 | (+) | SNNGATNNNN     | CATGATGACT     |
| M0007 |             | 0.86783 |      |     |                |                |
| 6     | V\$GATA2_01 | 9       | 1612 | (+) | NNNGATRNNN     | CATGATGACT     |
| M0012 |             |         |      |     |                |                |
| 7     | V\$GATA1_03 | 0.78197 | 1657 | (-) | RNSNNGATAANNGN | CCCTCCATCTCCTC |

|       |             |         |      |     |                |                |
|-------|-------------|---------|------|-----|----------------|----------------|
| M0007 |             | 0.92300 |      |     |                |                |
| 5     | V\$GATA1_01 | 1       | 1659 | (-) | SNNGATNNNN     | CTCCATCTCC     |
| M0007 |             |         |      |     |                |                |
| 6     | V\$GATA2_01 | 0.89806 | 1659 | (-) | NNNGATRNNN     | CTCCATCTCC     |
| M0007 |             | 0.90562 |      |     |                |                |
| 7     | V\$GATA3_01 | 7       | 1659 | (-) | NNGATARNG      | CTCCATCTC      |
| M0007 |             | 0.83810 |      |     |                |                |
| 5     | V\$GATA1_01 | 5       | 1668 | (-) | SNNGATNNNN     | CTCCATCTTA     |
| M0007 |             | 0.87550 |      |     |                |                |
| 6     | V\$GATA2_01 | 7       | 1668 | (-) | NNNGATRNNN     | CTCCATCTTA     |
| M0007 |             | 0.88834 |      |     |                |                |
| 7     | V\$GATA3_01 | 7       | 1668 | (-) | NNGATARNG      | CTCCATCTT      |
| M0007 |             | 0.93632 |      |     |                |                |
| 5     | V\$GATA1_01 | 8       | 1692 | (-) | SNNGATNNNN     | ACCAATCATG     |
| M0007 |             | 0.87054 |      |     |                |                |
| 6     | V\$GATA2_01 | 6       | 1692 | (-) | NNNGATRNNN     | ACCAATCATG     |
| M0007 |             | 0.85866 |      |     |                |                |
| 7     | V\$GATA3_01 | 2       | 1692 | (-) | NNGATARNG      | ACCAATCAT      |
| M0012 |             |         |      |     |                |                |
| 6     | V\$GATA1_02 | 0.895   | 1761 | (+) | NNNNNGATANKGNN | GCCCAGATAAAGGA |
| M0012 |             |         |      |     |                |                |
| 7     | V\$GATA1_03 | 0.88584 | 1761 | (+) | RNSNNGATAANNGN | GCCCAGATAAAGGA |
| M0012 |             | 0.87714 |      |     |                |                |
| 8     | V\$GATA1_04 | 5       | 1762 | (+) | NNCWGATARNNNN  | CCCAGATAAAGGA  |
| M0007 |             | 0.85439 |      |     |                |                |
| 5     | V\$GATA1_01 | 3       | 1763 | (+) | SNNGATNNNN     | CCAGATAAAG     |
| M0007 |             | 0.86964 |      |     |                |                |
| 6     | V\$GATA2_01 | 4       | 1763 | (+) | NNNGATRNNN     | CCAGATAAAG     |
| M0007 |             | 0.90784 |      |     |                |                |
| 7     | V\$GATA3_01 | 2       | 1764 | (+) | NNGATARNG      | CAGATAAAG      |
| M0020 |             | 0.92171 |      |     |                |                |
| 3     | V\$GATA_C   | 5       | 1765 | (+) | NGATAAGNMNN    | AGATAAAGGAA    |
| M0012 |             | 0.90906 |      |     |                |                |
| 6     | V\$GATA1_02 | 2       | 1799 | (+) | NNNNNGATANKGNN | GTAGAGATAGAGCC |
| M0012 |             |         |      |     |                |                |
| 7     | V\$GATA1_03 | 0.83317 | 1799 | (+) | RNSNNGATAANNGN | GTAGAGATAGAGCC |
| M0012 |             | 0.89859 |      |     |                |                |
| 8     | V\$GATA1_04 | 1       | 1800 | (+) | NNCWGATARNNNN  | TAGAGATAGAGCC  |
| M0007 |             | 0.85834 |      |     |                |                |
| 5     | V\$GATA1_01 | 2       | 1801 | (+) | SNNGATNNNN     | AGAGATAGAG     |
| M0007 |             | 0.87956 |      |     |                |                |
| 6     | V\$GATA2_01 | 7       | 1801 | (+) | NNNGATRNNN     | AGAGATAGAG     |
| M0007 |             | 0.95923 |      |     |                |                |
| 7     | V\$GATA3_01 | 8       | 1802 | (+) | NNGATARNG      | GAGATAGAG      |
| M0020 |             | 0.93103 |      |     |                |                |
| 3     | V\$GATA_C   | 4       | 1803 | (+) | NGATAAGNMNN    | AGATAGAGCCT    |
| M0007 |             | 0.77245 |      |     |                |                |
| 5     | V\$GATA1_01 | 8       | 1811 | (+) | SNNGATNNNN     | CCTGAGATGG     |
| M0007 |             | 0.81984 |      |     |                |                |
| 5     | V\$GATA1_01 | 2       | 1813 | (+) | SNNGATNNNN     | TGAGATGGAA     |
| M0007 |             | 0.84077 |      |     |                |                |
| 6     | V\$GATA2_01 | 6       | 1813 | (+) | NNNGATRNNN     | TGAGATGGAA     |
| M0007 |             | 0.87062 |      |     |                |                |
| 7     | V\$GATA3_01 | 5       | 1814 | (+) | NNGATARNG      | GAGATGGAA      |
| M0007 |             | 0.77986 |      |     |                |                |
| 5     | V\$GATA1_01 | 2       | 1869 | (-) | SNNGATNNNN     | ACCACTCAGC     |
| M0007 |             | 0.79386 |      |     |                |                |
| 6     | V\$GATA2_01 | 6       | 1919 | (+) | NNNGATRNNN     | TGGCATGGGA     |
| M0020 |             | 0.87542 |      |     |                |                |
| 3     | V\$GATA_C   | 7       | 1962 | (-) | NGATAAGNMNN    | CAACTTTATCT    |
| M0012 |             | 0.86781 |      |     |                |                |
| 6     | V\$GATA1_02 | 2       | 1963 | (-) | NNNNNGATANKGNN | AACTTTATCTTTCC |
| M0012 |             | 0.85031 |      |     |                |                |
| 7     | V\$GATA1_03 | 8       | 1963 | (-) | RNSNNGATAANNGN | AACTTTATCTTTCC |
| M0012 |             | 0.88664 |      |     |                |                |
| 8     | V\$GATA1_04 | 2       | 1963 | (-) | NNCWGATARNNNN  | AACTTTATCTTTC  |

|       |             |         |      |     |                |                |
|-------|-------------|---------|------|-----|----------------|----------------|
| M0007 |             | 0.82002 |      |     |                |                |
| 6     | V\$GATA2_01 | 7       | 1965 | (-) | NNNGATRNNN     | CTTTATCTTT     |
| M0007 |             | 0.91360 |      |     |                |                |
| 7     | V\$GATA3_01 | 2       | 1965 | (-) | NNGATARNG      | CTTTATCTT      |
| M0012 |             | 0.79718 |      |     |                |                |
| 6     | V\$GATA1_02 | 8       | 1974 | (-) | NNNNNGATANKGNN | TCCCTTTTCTCCAT |
| M0012 |             | 0.85399 |      |     |                |                |
| 7     | V\$GATA1_03 | 3       | 1974 | (-) | RNSNNGATAANNGN | TCCCTTTTCTCCAT |
| M0007 |             | 0.79115 |      |     |                |                |
| 6     | V\$GATA2_01 | 9       | 1998 | (+) | NNNGATRNNN     | ATGGATATTC     |
| M0020 |             | 0.83162 |      |     |                |                |
| 3     | V\$GATA_C   | 5       | 2011 | (-) | NGATAAGNMNN    | AGGCTTTCTCT    |
| M0007 |             | 0.83030 |      |     |                |                |
| 7     | V\$GATA3_01 | 6       | 2040 | (-) | NNGATARNG      | ATTAATCTC      |
| M0012 |             | 0.85781 |      |     |                |                |
| 6     | V\$GATA1_02 | 2       | 2065 | (-) | NNNNNGATANKGNN | ACCTGTATCTCCCA |
| M0012 |             | 0.79691 |      |     |                |                |
| 7     | V\$GATA1_03 | 3       | 2065 | (-) | RNSNNGATAANNGN | ACCTGTATCTCCCA |
| M0012 |             | 0.83639 |      |     |                |                |
| 8     | V\$GATA1_04 | 7       | 2065 | (-) | NNCWGATARNNNN  | ACCTGTATCTCCC  |
| M0007 |             | 0.89733 |      |     |                |                |
| 5     | V\$GATA1_01 | 5       | 2067 | (-) | SNNGATNNNN     | CTGTATCTCC     |
| M0007 |             | 0.90121 |      |     |                |                |
| 6     | V\$GATA2_01 | 8       | 2067 | (-) | NNNGATRNNN     | CTGTATCTCC     |
| M0007 |             | 0.87992 |      |     |                |                |
| 7     | V\$GATA3_01 | 9       | 2067 | (-) | NNGATARNG      | CTGTATCTC      |
| M0007 |             | 0.83662 |      |     |                |                |
| 5     | V\$GATA1_01 | 4       | 2091 | (+) | SNNGATNNNN     | GTGATTTCT      |
| M0020 |             | 0.83069 |      |     |                |                |
| 3     | V\$GATA_C   | 3       | 2095 | (-) | NGATAAGNMNN    | ATTCTTAACT     |
| M0012 |             | 0.81617 |      |     |                |                |
| 8     | V\$GATA1_04 | 6       | 2096 | (-) | NNCWGATARNNNN  | TTTCTTAACTGAA  |
| M0012 |             | 0.81700 |      |     |                |                |
| 7     | V\$GATA1_03 | 1       | 2118 | (+) | RNSNNGATAANNGN | ATGTAGAAAGCCAC |
| M0012 |             | 0.79078 |      |     |                |                |
| 7     | V\$GATA1_03 | 9       | 2145 | (-) | RNSNNGATAANNGN | TCGACTTTCTTCC  |
| M0012 |             | 0.84027 |      |     |                |                |
| 7     | V\$GATA1_03 | 4       | 2179 | (-) | RNSNNGATAANNGN | GCAACTCTCTCCT  |
| M0007 |             | 0.78134 |      |     |                |                |
| 5     | V\$GATA1_01 | 3       | 2196 | (+) | SNNGATNNNN     | ATTGATGCTA     |
| M0012 |             | 0.81187 |      |     |                |                |
| 6     | V\$GATA1_02 | 5       | 2232 | (+) | NNNNNGATANKGNN | ACCTTGATAATCTC |
| M0012 |             | 0.87922 |      |     |                |                |
| 7     | V\$GATA1_03 | 6       | 2232 | (+) | RNSNNGATAANNGN | ACCTTGATAATCTC |
| M0007 |             | 0.83168 |      |     |                |                |
| 5     | V\$GATA1_01 | 8       | 2234 | (+) | SNNGATNNNN     | CTTGATAATC     |
| M0007 |             | 0.79206 |      |     |                |                |
| 6     | V\$GATA2_01 | 1       | 2234 | (+) | NNNGATRNNN     | CTTGATAATC     |
| M0020 |             | 0.84995 |      |     |                |                |
| 3     | V\$GATA_C   | 3       | 2236 | (+) | NGATAAGNMNN    | TGATAATCTCA    |
| M0007 |             | 0.79121 |      |     |                |                |
| 5     | V\$GATA1_01 | 4       | 2237 | (-) | SNNGATNNNN     | GATAATCTCA     |
| M0007 |             | 0.81957 |      |     |                |                |
| 6     | V\$GATA2_01 | 6       | 2237 | (-) | NNNGATRNNN     | GATAATCTCA     |
| M0007 |             | 0.85024 |      |     |                |                |
| 7     | V\$GATA3_01 | 4       | 2237 | (-) | NNGATARNG      | GATAATCTC      |
| M0012 |             | 0.85693 |      |     |                |                |
| 7     | V\$GATA1_03 | 3       | 2342 | (-) | RNSNNGATAANNGN | ACCATTATGTGCCT |
| M0007 |             | 0.80739 |      |     |                |                |
| 6     | V\$GATA2_01 | 7       | 2344 | (-) | NNNGATRNNN     | CATTATGTGC     |
| M0012 |             | 0.79531 |      |     |                |                |
| 6     | V\$GATA1_02 | 3       | 2383 | (+) | NNNNNGATANKGNN | GTATACATAGGGAC |
| M0012 |             | 0.78417 |      |     |                |                |
| 7     | V\$GATA1_03 | 4       | 2432 | (-) | RNSNNGATAANNGN | CTACCTGTCCTCT  |
| M0020 |             | 0.84715 |      |     |                |                |
| 3     | V\$GATA_C   | 8       | 2437 | (-) | NGATAAGNMNN    | TGTCCTTCTCT    |

|       |             |         |      |     |                |                |
|-------|-------------|---------|------|-----|----------------|----------------|
| M0012 |             | 0.86062 |      |     |                |                |
| 6     | V\$GATA1_02 | 5       | 2569 | (+) | NNNNNGATANKGNN | GTAATGATACTTTT |
| M0012 |             | 0.79789 |      |     |                |                |
| 7     | V\$GATA1_03 | 3       | 2569 | (+) | RNSNNGATAANNGN | GTAATGATACTTTT |
| M0007 |             | 0.85291 |      |     |                |                |
| 5     | V\$GATA1_01 | 2       | 2571 | (+) | SNNGATNNNN     | AATGATACTT     |
| M0007 |             | 0.86197 |      |     |                |                |
| 6     | V\$GATA2_01 | 6       | 2571 | (+) | NNNGATRNNN     | AATGATACTT     |
| M0007 |             | 0.78035 |      |     |                |                |
| 5     | V\$GATA1_01 | 5       | 2595 | (-) | SNNGATNNNN     | AAAAATCAAA     |
| M0020 |             | 0.89530 |      |     |                |                |
| 3     | V\$GATA_C   | 9       | 2665 | (-) | NGATAAGNMNN    | TGGCTATATCT    |
| M0012 |             | 0.78343 |      |     |                |                |
| 6     | V\$GATA1_02 | 8       | 2666 | (-) | NNNNNGATANKGNN | GGCTATATCTACCC |
| M0012 |             | 0.83609 |      |     |                |                |
| 8     | V\$GATA1_04 | 1       | 2666 | (-) | NNCWGATARNNNN  | GGCTATATCTACC  |
| M0007 |             | 0.81145 |      |     |                |                |
| 5     | V\$GATA1_01 | 1       | 2668 | (-) | SNNGATNNNN     | CTATATCTAC     |
| M0007 |             |         |      |     |                |                |
| 6     | V\$GATA2_01 | 0.80018 | 2668 | (-) | NNNGATRNNN     | CTATATCTAC     |
| M0007 |             | 0.85733 |      |     |                |                |
| 7     | V\$GATA3_01 | 3       | 2668 | (-) | NNGATARNG      | CTATATCTA      |
| M0007 |             | 0.78084 |      |     |                |                |
| 5     | V\$GATA1_01 | 9       | 2680 | (-) | SNNGATNNNN     | ATAAATCTAG     |
| M0007 |             | 0.86031 |      |     |                |                |
| 5     | V\$GATA1_01 | 6       | 2724 | (-) | SNNGATNNNN     | CCAAATCACT     |
| M0007 |             | 0.81371 |      |     |                |                |
| 6     | V\$GATA2_01 | 2       | 2724 | (-) | NNNGATRNNN     | CCAAATCACT     |
| M0007 |             | 0.88258 |      |     |                |                |
| 7     | V\$GATA3_01 | 8       | 2724 | (-) | NNGATARNG      | CCAAATCAC      |
| M0007 |             |         |      |     |                |                |
| 5     | V\$GATA1_01 | 0.88845 | 2801 | (-) | SNNGATNNNN     | TGCAATCATG     |
| M0007 |             | 0.85340 |      |     |                |                |
| 6     | V\$GATA2_01 | 6       | 2801 | (-) | NNNGATRNNN     | TGCAATCATG     |
| M0007 |             | 0.85378 |      |     |                |                |
| 7     | V\$GATA3_01 | 8       | 2801 | (-) | NNGATARNG      | TGCAATCAT      |
| M0020 |             |         |      |     |                |                |
| 3     | V\$GATA_C   | 0.84343 | 2828 | (-) | NGATAAGNMNN    | TGTGACTATCC    |
| M0012 |             | 0.78312 |      |     |                |                |
| 6     | V\$GATA1_02 | 5       | 2829 | (-) | NNNNNGATANKGNN | GTGACTATCCTGGC |
| M0012 |             | 0.88020 |      |     |                |                |
| 7     | V\$GATA1_03 | 6       | 2829 | (-) | RNSNNGATAANNGN | GTGACTATCCTGGC |
| M0007 |             |         |      |     |                |                |
| 5     | V\$GATA1_01 | 0.9077  | 2831 | (-) | SNNGATNNNN     | GACTATCCTG     |
| M0007 |             | 0.95083 |      |     |                |                |
| 6     | V\$GATA2_01 | 4       | 2831 | (-) | NNNGATRNNN     | GACTATCCTG     |
| M0007 |             | 0.84980 |      |     |                |                |
| 7     | V\$GATA3_01 | 1       | 2831 | (-) | NNGATARNG      | GACTATCCT      |
| M0012 |             |         |      |     |                |                |
| 6     | V\$GATA1_02 | 0.785   | 2840 | (-) | NNNNNGATANKGNN | GGCATTAACCTAC  |
| M0012 |             | 0.79152 |      |     |                |                |
| 7     | V\$GATA1_03 | 4       | 2943 | (-) | RNSNNGATAANNGN | ATAGTTATATTAT  |
| M0012 |             | 0.83047 |      |     |                |                |
| 7     | V\$GATA1_03 | 5       | 2959 | (+) | RNSNNGATAANNGN | AGCAAAATAGCTGC |
| M0012 |             |         |      |     |                |                |
| 7     | V\$GATA1_03 | 0.78001 | 3009 | (-) | RNSNNGATAANNGN | ACATTTATTTCTAT |
| M0007 |             |         |      |     |                |                |
| 5     | V\$GATA1_01 | 0.79615 | 3034 | (+) | SNNGATNNNN     | AAAGATGTTC     |
| M0007 |             |         |      |     |                |                |
| 6     | V\$GATA2_01 | 0.82995 | 3034 | (+) | NNNGATRNNN     | AAAGATGTTC     |
| M0007 |             | 0.83761 |      |     |                |                |
| 5     | V\$GATA1_01 | 1       | 3045 | (-) | SNNGATNNNN     | GGACATCAGT     |
| M0007 |             | 0.84573 |      |     |                |                |
| 6     | V\$GATA2_01 | 7       | 3045 | (-) | NNNGATRNNN     | GGACATCAGT     |
| M0007 |             | 0.84501 |      |     |                |                |
| 5     | V\$GATA1_01 | 5       | 3067 | (-) | SNNGATNNNN     | AGAAATCACA     |

|       |             |         |      |     |                |                |
|-------|-------------|---------|------|-----|----------------|----------------|
| M0007 |             | 0.84573 |      |     |                |                |
| 6     | V\$GATA2_01 | 7       | 3067 | (-) | NNNGATRNNN     | AGAAATCACA     |
| M0020 |             | 0.85181 |      |     |                |                |
| 3     | V\$GATA_C   | 7       | 3074 | (-) | NGATAAGNMNN    | ACACTTTATCA    |
| M0012 |             | 0.84562 |      |     |                |                |
| 6     | V\$GATA1_02 | 5       | 3075 | (-) | NNNNNGATANKGNN | CACTTTATCATGTA |
| M0012 |             | 0.89491 |      |     |                |                |
| 8     | V\$GATA1_04 | 4       | 3075 | (-) | NNCWGATARNNNN  | CACTTTATCATGT  |
| M0007 |             | 0.85439 |      |     |                |                |
| 5     | V\$GATA1_01 | 3       | 3077 | (-) | SNNGATNNNN     | CTTTATCATG     |
| M0007 |             | 0.85024 |      |     |                |                |
| 6     | V\$GATA2_01 | 8       | 3077 | (-) | NNNGATRNNN     | CTTTATCATG     |
| M0007 |             |         |      |     |                |                |
| 7     | V\$GATA3_01 | 0.89012 | 3077 | (-) | NNGATARNG      | CTTTATCAT      |
| M0007 |             | 0.77245 |      |     |                |                |
| 5     | V\$GATA1_01 | 8       | 3092 | (-) | SNNGATNNNN     | GAAAATCTTT     |
| M0007 |             | 0.79386 |      |     |                |                |
| 6     | V\$GATA2_01 | 6       | 3092 | (-) | NNNGATRNNN     | GAAAATCTTT     |
| M0012 |             | 0.80218 |      |     |                |                |
| 6     | V\$GATA1_02 | 8       | 3110 | (+) | NNNNNGATANKGNN | CATATGATAGAGAA |
| M0012 |             | 0.91023 |      |     |                |                |
| 8     | V\$GATA1_04 | 3       | 3111 | (+) | NNCWGATARNNNN  | ATATGATAGAGAA  |
| M0007 |             | 0.85883 |      |     |                |                |
| 5     | V\$GATA1_01 | 5       | 3112 | (+) | SNNGATNNNN     | TATGATAGAG     |
| M0007 |             | 0.89264 |      |     |                |                |
| 6     | V\$GATA2_01 | 8       | 3112 | (+) | NNNGATRNNN     | TATGATAGAG     |
| M0007 |             | 0.91847 |      |     |                |                |
| 7     | V\$GATA3_01 | 6       | 3113 | (+) | NNGATARNG      | ATGATAGAG      |
| M0020 |             | 0.89499 |      |     |                |                |
| 3     | V\$GATA_C   | 8       | 3114 | (+) | NGATAAGNMNN    | TGATAGAGAAA    |
| M0012 |             | 0.79312 |      |     |                |                |
| 6     | V\$GATA1_02 | 5       | 3149 | (+) | NNNNNGATANKGNN | CTGAAGATATTTTT |
| M0007 |             | 0.87561 |      |     |                |                |
| 5     | V\$GATA1_01 | 7       | 3151 | (+) | SNNGATNNNN     | GAAGATATTT     |
| M0007 |             | 0.90888 |      |     |                |                |
| 6     | V\$GATA2_01 | 6       | 3151 | (+) | NNNGATRNNN     | GAAGATATTT     |
| M0007 |             | 0.83473 |      |     |                |                |
| 7     | V\$GATA3_01 | 6       | 3152 | (+) | NNGATARNG      | AAGATATTT      |
| M0007 |             | 0.78574 |      |     |                |                |
| 6     | V\$GATA2_01 | 7       | 3169 | (-) | NNNGATRNNN     | TAATATGCTC     |
| M0007 |             | 0.81638 |      |     |                |                |
| 5     | V\$GATA1_01 | 7       | 3207 | (-) | SNNGATNNNN     | AAAAATCATA     |
| M0007 |             | 0.81867 |      |     |                |                |
| 6     | V\$GATA2_01 | 4       | 3207 | (-) | NNNGATRNNN     | AAAAATCATA     |
| M0007 |             | 0.78282 |      |     |                |                |
| 5     | V\$GATA1_01 | 3       | 3220 | (+) | SNNGATNNNN     | CAGGATCAGA     |
| M0007 |             | 0.84205 |      |     |                |                |
| 5     | V\$GATA1_01 | 3       | 3220 | (-) | SNNGATNNNN     | CAGGATCAGA     |
| M0007 |             | 0.81506 |      |     |                |                |
| 6     | V\$GATA2_01 | 5       | 3220 | (+) | NNNGATRNNN     | CAGGATCAGA     |
| M0007 |             |         |      |     |                |                |
| 6     | V\$GATA2_01 | 0.85115 | 3220 | (-) | NNNGATRNNN     | CAGGATCAGA     |
| M0020 |             |         |      |     |                |                |
| 3     | V\$GATA_C   | 0.92886 | 3244 | (-) | NGATAAGNMNN    | AATTCCTATCT    |
| M0012 |             | 0.83406 |      |     |                |                |
| 6     | V\$GATA1_02 | 3       | 3245 | (-) | NNNNNGATANKGNN | ATTCCTATCTCACA |
| M0012 |             | 0.92616 |      |     |                |                |
| 8     | V\$GATA1_04 | 4       | 3245 | (-) | NNCWGATARNNNN  | ATTCCTATCTCAC  |
| M0007 |             | 0.87166 |      |     |                |                |
| 5     | V\$GATA1_01 | 8       | 3247 | (-) | SNNGATNNNN     | TCCTATCTCA     |
| M0007 |             | 0.91565 |      |     |                |                |
| 6     | V\$GATA2_01 | 2       | 3247 | (-) | NNNGATRNNN     | TCCTATCTCA     |
| M0007 |             | 0.96499 |      |     |                |                |
| 7     | V\$GATA3_01 | 8       | 3247 | (-) | NNGATARNG      | TCCTATCTC      |
| M0012 |             | 0.79812 |      |     |                |                |
| 6     | V\$GATA1_02 | 5       | 3262 | (-) | NNNNNGATANKGNN | ACCCCAATCACTTT |

|       |             |         |      |     |                |                |
|-------|-------------|---------|------|-----|----------------|----------------|
| M0007 |             | 0.90720 |      |     |                |                |
| 5     | V\$GATA1_01 | 6       | 3264 | (-) | SNNGATNNNN     | CCCAATCACT     |
| M0007 |             | 0.85024 |      |     |                |                |
| 6     | V\$GATA2_01 | 8       | 3264 | (-) | NNNGATRNNN     | CCCAATCACT     |
| M0007 |             | 0.94284 |      |     |                |                |
| 7     | V\$GATA3_01 | 4       | 3264 | (-) | NNGATARNG      | CCCAATCAC      |
| M0012 |             | 0.78843 |      |     |                |                |
| 6     | V\$GATA1_02 | 8       | 3290 | (+) | NNNNNGATANKGNN | TAAAAGATTGGGAA |
| M0007 |             | 0.85784 |      |     |                |                |
| 5     | V\$GATA1_01 | 8       | 3292 | (+) | SNNGATNNNN     | AAAGATTGGG     |
| M0007 |             | 0.85340 |      |     |                |                |
| 6     | V\$GATA2_01 | 6       | 3292 | (+) | NNNGATRNNN     | AAAGATTGGG     |
| M0007 |             | 0.94904 |      |     |                |                |
| 7     | V\$GATA3_01 | 7       | 3293 | (+) | NNGATARNG      | AAGATTGGG      |
| M0007 |             | 0.83711 |      |     |                |                |
| 5     | V\$GATA1_01 | 7       | 3340 | (-) | SNNGATNNNN     | GCACATCTAC     |
| M0007 |             | 0.80153 |      |     |                |                |
| 6     | V\$GATA2_01 | 4       | 3340 | (-) | NNNGATRNNN     | GCACATCTAC     |
| M0012 |             | 0.80718 |      |     |                |                |
| 6     | V\$GATA1_02 | 7       | 3418 | (+) | NNNNNGATANKGNN | CCAGGGATACTGTC |
| M0012 |             | 0.79103 |      |     |                |                |
| 7     | V\$GATA1_03 | 4       | 3418 | (+) | RNSNNGATAANNGN | CCAGGGATACTGTC |
| M0007 |             |         |      |     |                |                |
| 5     | V\$GATA1_01 | 0.86772 | 3420 | (+) | SNNGATNNNN     | AGGGATACTG     |
| M0007 |             | 0.90888 |      |     |                |                |
| 6     | V\$GATA2_01 | 6       | 3420 | (+) | NNNGATRNNN     | AGGGATACTG     |
| M0007 |             | 0.85467 |      |     |                |                |
| 7     | V\$GATA3_01 | 4       | 3421 | (+) | NNGATARNG      | GGGATACTG      |
| M0007 |             | 0.77344 |      |     |                |                |
| 5     | V\$GATA1_01 | 5       | 3432 | (-) | SNNGATNNNN     | CATAATCAAA     |
| M0007 |             | 0.85201 |      |     |                |                |
| 7     | V\$GATA3_01 | 6       | 3432 | (-) | NNGATARNG      | CATAATCAA      |
| M0007 |             |         |      |     |                |                |
| 7     | V\$GATA3_01 | 0.82942 | 3437 | (-) | NNGATARNG      | TCAAATCTA      |
| M0012 |             | 0.79906 |      |     |                |                |
| 6     | V\$GATA1_02 | 3       | 3485 | (-) | NNNNNGATANKGNN | AAAGCTATCTGAAA |
| M0012 |             | 0.87806 |      |     |                |                |
| 8     | V\$GATA1_04 | 4       | 3485 | (-) | NNCWGATARNNNN  | AAAGCTATCTGAA  |
| M0007 |             | 0.88696 |      |     |                |                |
| 5     | V\$GATA1_01 | 9       | 3487 | (-) | SNNGATNNNN     | AGCTATCTGA     |
| M0007 |             | 0.95805 |      |     |                |                |
| 6     | V\$GATA2_01 | 1       | 3487 | (-) | NNNGATRNNN     | AGCTATCTGA     |
| M0007 |             | 0.87328 |      |     |                |                |
| 7     | V\$GATA3_01 | 3       | 3487 | (-) | NNGATARNG      | AGCTATCTG      |
| M0007 |             | 0.87611 |      |     |                |                |
| 5     | V\$GATA1_01 | 1       | 3514 | (+) | SNNGATNNNN     | GGGGATTTTT     |
| M0007 |             | 0.86693 |      |     |                |                |
| 6     | V\$GATA2_01 | 7       | 3514 | (+) | NNNGATRNNN     | GGGGATTTTT     |
| M0012 |             | 0.79103 |      |     |                |                |
| 7     | V\$GATA1_03 | 4       | 3541 | (-) | RNSNNGATAANNGN | CTTGTTTTCATGT  |
| M0020 |             | 0.83224 |      |     |                |                |
| 3     | V\$GATA_C   | 6       | 3558 | (-) | NGATAAGNMNN    | TTGGCTATCA     |
| M0012 |             | 0.93018 |      |     |                |                |
| 7     | V\$GATA1_03 | 1       | 3559 | (-) | RNSNNGATAANNGN | TTGGCTATCACCT  |
| M0012 |             | 0.85539 |      |     |                |                |
| 8     | V\$GATA1_04 | 2       | 3559 | (-) | NNCWGATARNNNN  | TTGGCTATCACCC  |
| M0007 |             | 0.95705 |      |     |                |                |
| 5     | V\$GATA1_01 | 8       | 3561 | (-) | SNNGATNNNN     | GGCTATCACC     |
| M0007 |             |         |      |     |                |                |
| 6     | V\$GATA2_01 | 0.9576  | 3561 | (-) | NNNGATRNNN     | GGCTATCACC     |
| M0007 |             |         |      |     |                |                |
| 7     | V\$GATA3_01 | 0.87284 | 3561 | (-) | NNGATARNG      | GGCTATCAC      |
| M0007 |             | 0.85932 |      |     |                |                |
| 5     | V\$GATA1_01 | 9       | 3587 | (-) | SNNGATNNNN     | TTCAATCGGC     |
| M0007 |             | 0.81596 |      |     |                |                |
| 6     | V\$GATA2_01 | 8       | 3587 | (-) | NNNGATRNNN     | TTCAATCGGC     |

|       |             |         |      |     |                 |                |
|-------|-------------|---------|------|-----|-----------------|----------------|
| M0007 |             | 0.83783 |      |     |                 |                |
| 7     | V\$GATA3_01 | 8       | 3587 | (-) | NNGATARNG       | TTCAATCGG      |
| M0007 |             | 0.85340 |      |     |                 |                |
| 5     | V\$GATA1_01 | 6       | 3594 | (+) | SNNGATNNNN      | GGCGATCCCA     |
| M0007 |             | 0.82428 |      |     |                 |                |
| 5     | V\$GATA1_01 | 4       | 3594 | (-) | SNNGATNNNN      | GGCGATCCCA     |
| M0007 |             | 0.84979 |      |     |                 |                |
| 6     | V\$GATA2_01 | 7       | 3594 | (+) | NNNGATRNNN      | GGCGATCCCA     |
| M0007 |             | 0.90437 |      |     |                 |                |
| 6     | V\$GATA2_01 | 5       | 3594 | (-) | NNNGATRNNN      | GGCGATCCCA     |
| M0012 |             | 0.82015 |      |     |                 |                |
| 8     | V\$GATA1_04 | 9       | 3605 | (-) | NNCWGATARNNNN   | GCACTTATTTGCA  |
| M0007 |             | 0.83415 |      |     |                 |                |
| 5     | V\$GATA1_01 | 6       | 3643 | (+) | SNNGATNNNN      | TACGATGTTT     |
| M0007 |             | 0.86287 |      |     |                 |                |
| 6     | V\$GATA2_01 | 8       | 3643 | (+) | NNNGATRNNN      | TACGATGTTT     |
| M0020 |             | 0.85461 |      |     |                 |                |
| 3     | V\$GATA_C   | 3       | 3740 | (-) | NGATAAGNMNN     | AGTTAGTATCT    |
| M0012 |             |         |      |     |                 |                |
| 6     | V\$GATA1_02 | 0.82625 | 3741 | (-) | NNNNNGATANKGNN  | GTTAGTATCTCCTA |
| M0012 |             | 0.79176 |      |     |                 |                |
| 7     | V\$GATA1_03 | 9       | 3741 | (-) | RNSNNGATAANNNGN | GTTAGTATCTCCTA |
| M0012 |             | 0.81127 |      |     |                 |                |
| 8     | V\$GATA1_04 | 5       | 3741 | (-) | NNCWGATARNNNN   | GTTAGTATCTCCT  |
| M0007 |             | 0.88993 |      |     |                 |                |
| 5     | V\$GATA1_01 | 1       | 3743 | (-) | SNNGATNNNN      | TAGTATCTCC     |
| M0007 |             | 0.89851 |      |     |                 |                |
| 6     | V\$GATA2_01 | 2       | 3743 | (-) | NNNGATRNNN      | TAGTATCTCC     |
| M0007 |             | 0.86486 |      |     |                 |                |
| 7     | V\$GATA3_01 | 5       | 3743 | (-) | NNGATARNG       | TAGTATCTC      |
| M0007 |             | 0.81641 |      |     |                 |                |
| 6     | V\$GATA2_01 | 9       | 3807 | (-) | NNNGATRNNN      | GACTATGACA     |
| M0012 |             | 0.79666 |      |     |                 |                |
| 7     | V\$GATA1_03 | 8       | 3820 | (-) | RNSNNGATAANNNGN | ACATTTATTTTCTT |
| M0020 |             | 0.83845 |      |     |                 |                |
| 3     | V\$GATA_C   | 9       | 3903 | (+) | NGATAAGNMNN     | TGACAGGGATT    |
| M0007 |             | 0.78331 |      |     |                 |                |
| 5     | V\$GATA1_01 | 7       | 3907 | (+) | SNNGATNNNN      | AGGGATTGAA     |
| M0007 |             | 0.78664 |      |     |                 |                |
| 6     | V\$GATA2_01 | 9       | 3907 | (+) | NNNGATRNNN      | AGGGATTGAA     |
| M0007 |             |         |      |     |                 |                |
| 7     | V\$GATA3_01 | 0.84537 | 3908 | (+) | NNGATARNG       | GGGATTGAA      |
| M0012 |             | 0.85294 |      |     |                 |                |
| 8     | V\$GATA1_04 | 1       | 3917 | (-) | NNCWGATARNNNN   | CTTTGTATCAGAA  |
| M0007 |             | 0.80700 |      |     |                 |                |
| 5     | V\$GATA1_01 | 9       | 3919 | (-) | SNNGATNNNN      | TTGTATCAGA     |
| M0007 |             | 0.83265 |      |     |                 |                |
| 6     | V\$GATA2_01 | 7       | 3919 | (-) | NNNGATRNNN      | TTGTATCAGA     |
| M0007 |             | 0.80157 |      |     |                 |                |
| 5     | V\$GATA1_01 | 9       | 4058 | (-) | SNNGATNNNN      | AAGAATCAAA     |
| M0007 |             | 0.79657 |      |     |                 |                |
| 6     | V\$GATA2_01 | 2       | 4087 | (-) | NNNGATRNNN      | TTCAATCTTA     |
| M0007 |             | 0.87328 |      |     |                 |                |
| 7     | V\$GATA3_01 | 3       | 4087 | (-) | NNGATARNG       | TTCAATCTT      |
| M0012 |             | 0.78843 |      |     |                 |                |
| 6     | V\$GATA1_02 | 8       | 4106 | (+) | NNNNNGATANKGNN  | AAAATGATACAAAT |
| M0012 |             | 0.80769 |      |     |                 |                |
| 7     | V\$GATA1_03 | 2       | 4106 | (+) | RNSNNGATAANNNGN | AAAATGATACAAAT |
| M0012 |             | 0.82383 |      |     |                 |                |
| 8     | V\$GATA1_04 | 6       | 4107 | (+) | NNCWGATARNNNN   | AAATGATACAAAT  |
| M0007 |             | 0.77788 |      |     |                 |                |
| 5     | V\$GATA1_01 | 7       | 4108 | (+) | SNNGATNNNN      | AATGATACAA     |
| M0007 |             | 0.79206 |      |     |                 |                |
| 6     | V\$GATA2_01 | 1       | 4108 | (+) | NNNGATRNNN      | AATGATACAA     |
| M0020 |             | 0.87325 |      |     |                 |                |
| 3     | V\$GATA_C   | 3       | 4110 | (+) | NGATAAGNMNN     | TGATACAAATT    |

|       |             |         |      |     |                |                |
|-------|-------------|---------|------|-----|----------------|----------------|
| M0020 |             | 0.83566 |      |     |                |                |
| 3     | V\$GATA_C   | 3       | 4172 | (-) | NGATAAGNMNN    | ATTCAATATCT    |
| M0012 |             | 0.83656 |      |     |                |                |
| 6     | V\$GATA1_02 | 2       | 4173 | (-) | NNNNNGATANKGNN | TTCAATATCTTGTA |
| M0012 |             | 0.84681 |      |     |                |                |
| 8     | V\$GATA1_04 | 4       | 4173 | (-) | NNCWGATARNNNN  | TTCAATATCTTGT  |
| M0007 |             | 0.89141 |      |     |                |                |
| 5     | V\$GATA1_01 | 2       | 4175 | (-) | SNNGATNNNN     | CAATATCTTG     |
| M0007 |             | 0.91655 |      |     |                |                |
| 6     | V\$GATA2_01 | 4       | 4175 | (-) | NNNGATRNNN     | CAATATCTTG     |
| M0007 |             | 0.90163 |      |     |                |                |
| 7     | V\$GATA3_01 | 9       | 4175 | (-) | NNGATARNG      | CAATATCTT      |
| M0007 |             |         |      |     |                |                |
| 6     | V\$GATA2_01 | 0.8083  | 4247 | (-) | NNNGATRNNN     | CATTATGCTG     |
| M0007 |             | 0.78574 |      |     |                |                |
| 6     | V\$GATA2_01 | 7       | 4352 | (-) | NNNGATRNNN     | AGCAATGTGA     |
| M0012 |             | 0.78882 |      |     |                |                |
| 7     | V\$GATA1_03 | 9       | 4355 | (+) | RNSNNGATAANNGN | AATGTGATAGCATC |
| M0012 |             | 0.85906 |      |     |                |                |
| 8     | V\$GATA1_04 | 9       | 4356 | (+) | NNCWGATARNNNN  | ATGTGATAGCATC  |
| M0007 |             | 0.88005 |      |     |                |                |
| 5     | V\$GATA1_01 | 9       | 4357 | (+) | SNNGATNNNN     | TGTGATAGCA     |
| M0007 |             | 0.91700 |      |     |                |                |
| 6     | V\$GATA2_01 | 5       | 4357 | (+) | NNNGATRNNN     | TGTGATAGCA     |
| M0007 |             | 0.90474 |      |     |                |                |
| 7     | V\$GATA3_01 | 1       | 4358 | (+) | NNGATARNG      | GTGATAGCA      |
| M0007 |             | 0.79664 |      |     |                |                |
| 5     | V\$GATA1_01 | 4       | 4362 | (-) | SNNGATNNNN     | TAGCATCTTT     |
| M0007 |             | 0.81506 |      |     |                |                |
| 6     | V\$GATA2_01 | 5       | 4362 | (-) | NNNGATRNNN     | TAGCATCTTT     |
| M0020 |             |         |      |     |                |                |
| 3     | V\$GATA_C   | 0.83908 | 4386 | (-) | NGATAAGNMNN    | ATTCCTTCTCT    |
| M0007 |             | 0.84758 |      |     |                |                |
| 7     | V\$GATA3_01 | 5       | 4389 | (-) | NNGATARNG      | CCTTCTCTC      |
| M0012 |             | 0.86968 |      |     |                |                |
| 6     | V\$GATA1_02 | 7       | 4411 | (+) | NNNNNGATANKGNN | GTTAAGATAATATT |
| M0012 |             | 0.79862 |      |     |                |                |
| 7     | V\$GATA1_03 | 8       | 4411 | (+) | RNSNNGATAANNGN | GTTAAGATAATATT |
| M0012 |             | 0.86090 |      |     |                |                |
| 8     | V\$GATA1_04 | 7       | 4412 | (+) | NNCWGATARNNNN  | TTAAGATAATATT  |
| M0007 |             | 0.84979 |      |     |                |                |
| 6     | V\$GATA2_01 | 7       | 4413 | (+) | NNNGATRNNN     | TAAGATAATA     |
| M0007 |             | 0.89853 |      |     |                |                |
| 7     | V\$GATA3_01 | 8       | 4414 | (+) | NNGATARNG      | AAGATAATA      |
| M0020 |             | 0.85958 |      |     |                |                |
| 3     | V\$GATA_C   | 4       | 4415 | (+) | NGATAAGNMNN    | AGATAATATTT    |
| M0007 |             |         |      |     |                |                |
| 5     | V\$GATA1_01 | 0.77542 | 4440 | (+) | SNNGATNNNN     | TGAGATGAAC     |
| M0007 |             | 0.81551 |      |     |                |                |
| 6     | V\$GATA2_01 | 6       | 4440 | (+) | NNNGATRNNN     | TGAGATGAAC     |
| M0007 |             | 0.83030 |      |     |                |                |
| 7     | V\$GATA3_01 | 6       | 4452 | (-) | NNGATARNG      | CATAATCCA      |
| M0012 |             | 0.80132 |      |     |                |                |
| 7     | V\$GATA1_03 | 3       | 4527 | (-) | RNSNNGATAANNGN | CTTTTGTCCCCC   |
| M0012 |             |         |      |     |                |                |
| 6     | V\$GATA1_02 | 0.83625 | 4557 | (-) | NNNNNGATANKGNN | AAAACATCTTAAG  |
| M0012 |             | 0.84007 |      |     |                |                |
| 8     | V\$GATA1_04 | 4       | 4557 | (-) | NNCWGATARNNNN  | AAAACATCTTAA   |
| M0007 |             | 0.86623 |      |     |                |                |
| 5     | V\$GATA1_01 | 9       | 4559 | (-) | SNNGATNNNN     | AACTATCTTA     |
| M0007 |             | 0.93098 |      |     |                |                |
| 6     | V\$GATA2_01 | 8       | 4559 | (-) | NNNGATRNNN     | AACTATCTTA     |
| M0007 |             | 0.89499 |      |     |                |                |
| 7     | V\$GATA3_01 | 3       | 4559 | (-) | NNGATARNG      | AACTATCTT      |
| M0007 |             | 0.79318 |      |     |                |                |
| 5     | V\$GATA1_01 | 9       | 4569 | (-) | SNNGATNNNN     | AGGAATCAAT     |



|       |             |         |      |     |                |                |
|-------|-------------|---------|------|-----|----------------|----------------|
| M0007 |             | 0.83761 |      |     |                |                |
| 5     | V\$GATA1_01 | 1       | 4598 | (+) | SNNGATNNNN     | ACTGATATCC     |
| M0007 |             | 0.87415 |      |     |                |                |
| 6     | V\$GATA2_01 | 4       | 4598 | (+) | NNNGATRNNN     | ACTGATATCC     |
| M0012 |             | 0.82116 |      |     |                |                |
| 7     | V\$GATA1_03 | 6       | 4598 | (-) | RNSNNGATAANNGN | ACTGATATCCAGAT |
| M0007 |             | 0.80404 |      |     |                |                |
| 5     | V\$GATA1_01 | 7       | 4600 | (-) | SNNGATNNNN     | TGATATCCAG     |
| M0007 |             |         |      |     |                |                |
| 6     | V\$GATA2_01 | 0.82544 | 4600 | (-) | NNNGATRNNN     | TGATATCCAG     |
| M0007 |             | 0.86525 |      |     |                |                |
| 5     | V\$GATA1_01 | 2       | 4606 | (+) | SNNGATNNNN     | CCAGATGTTA     |
| M0007 |             | 0.85340 |      |     |                |                |
| 6     | V\$GATA2_01 | 6       | 4606 | (+) | NNNGATRNNN     | CCAGATGTTA     |
| M0007 |             | 0.81688 |      |     |                |                |
| 5     | V\$GATA1_01 | 1       | 4615 | (-) | SNNGATNNNN     | ATGCATCCCT     |
| M0007 |             | 0.82724 |      |     |                |                |
| 6     | V\$GATA2_01 | 4       | 4615 | (-) | NNNGATRNNN     | ATGCATCCCT     |
| M0012 |             | 0.78466 |      |     |                |                |
| 7     | V\$GATA1_03 | 4       | 4688 | (+) | RNSNNGATAANNGN | CAGGACATAATCAT |
| M0007 |             | 0.79070 |      |     |                |                |
| 6     | V\$GATA2_01 | 8       | 4690 | (+) | NNNGATRNNN     | GGACATAATC     |
| M0007 |             | 0.80108 |      |     |                |                |
| 5     | V\$GATA1_01 | 6       | 4693 | (-) | SNNGATNNNN     | CATAATCATT     |
| M0007 |             | 0.78439 |      |     |                |                |
| 6     | V\$GATA2_01 | 3       | 4693 | (-) | NNNGATRNNN     | CATAATCATT     |
| M0007 |             | 0.87638 |      |     |                |                |
| 7     | V\$GATA3_01 | 5       | 4693 | (-) | NNGATARNG      | CATAATCAT      |
| M0007 |             | 0.82002 |      |     |                |                |
| 6     | V\$GATA2_01 | 7       | 4741 | (-) | NNNGATRNNN     | AACTATGAGA     |
| M0012 |             | 0.86093 |      |     |                |                |
| 6     | V\$GATA1_02 | 8       | 4744 | (+) | NNNNNGATANKGNN | TATGAGATAATGAA |
| M0012 |             | 0.90563 |      |     |                |                |
| 8     | V\$GATA1_04 | 7       | 4745 | (+) | NNCWGATARNNNN  | ATGAGATAATGAA  |
| M0007 |             | 0.84106 |      |     |                |                |
| 5     | V\$GATA1_01 | 6       | 4746 | (+) | SNNGATNNNN     | TGAGATAATG     |
| M0007 |             | 0.90076 |      |     |                |                |
| 6     | V\$GATA2_01 | 7       | 4746 | (+) | NNNGATRNNN     | TGAGATAATG     |
| M0007 |             |         |      |     |                |                |
| 7     | V\$GATA3_01 | 0.95082 | 4747 | (+) | NNGATARNG      | GAGATAATG      |
| M0020 |             | 0.90214 |      |     |                |                |
| 3     | V\$GATA_C   | 4       | 4748 | (+) | NGATAAGNMNN    | AGATAATGAAA    |
| M0007 |             | 0.78134 |      |     |                |                |
| 5     | V\$GATA1_01 | 3       | 4769 | (+) | SNNGATNNNN     | AGAGATCATG     |
| M0007 |             | 0.84945 |      |     |                |                |
| 5     | V\$GATA1_01 | 7       | 4769 | (-) | SNNGATNNNN     | AGAGATCATG     |
| M0007 |             | 0.80378 |      |     |                |                |
| 6     | V\$GATA2_01 | 9       | 4769 | (+) | NNNGATRNNN     | AGAGATCATG     |
| M0007 |             |         |      |     |                |                |
| 6     | V\$GATA2_01 | 0.84664 | 4769 | (-) | NNNGATRNNN     | AGAGATCATG     |
| M0007 |             | 0.83517 |      |     |                |                |
| 7     | V\$GATA3_01 | 9       | 4770 | (+) | NNGATARNG      | GAGATCATG      |
| M0007 |             | 0.81243 |      |     |                |                |
| 5     | V\$GATA1_01 | 8       | 4794 | (+) | SNNGATNNNN     | TAAGATGCAG     |
| M0007 |             | 0.85024 |      |     |                |                |
| 6     | V\$GATA2_01 | 8       | 4794 | (+) | NNNGATRNNN     | TAAGATGCAG     |
| M0012 |             | 0.77281 |      |     |                |                |
| 6     | V\$GATA1_02 | 2       | 4799 | (+) | NNNNNGATANKGNN | TGCAGGATACGAAA |
| M0012 |             |         |      |     |                |                |
| 7     | V\$GATA1_03 | 0.78197 | 4799 | (+) | RNSNNGATAANNGN | TGCAGGATACGAAA |
| M0007 |             | 0.87364 |      |     |                |                |
| 5     | V\$GATA1_01 | 3       | 4801 | (+) | SNNGATNNNN     | CAGGATACGA     |
| M0007 |             | 0.90572 |      |     |                |                |
| 6     | V\$GATA2_01 | 8       | 4801 | (+) | NNNGATRNNN     | CAGGATACGA     |
| M0007 |             | 0.82321 |      |     |                |                |
| 7     | V\$GATA3_01 | 7       | 4802 | (+) | NNGATARNG      | AGGATACGA      |

|       |             |         |      |     |                |                |
|-------|-------------|---------|------|-----|----------------|----------------|
| M0020 |             | 0.89375 |      |     |                |                |
| 3     | V\$GATA_C   | 6       | 4803 | (+) | NGATAAGNMNN    | GGATACGAAAA    |
| M0007 |             | 0.81934 |      |     |                |                |
| 5     | V\$GATA1_01 | 8       | 4860 | (+) | SNNGATNNNN     | TAAGATGTCT     |
| M0007 |             |         |      |     |                |                |
| 6     | V\$GATA2_01 | 0.88498 | 4860 | (+) | NNNGATRNNN     | TAAGATGTCT     |
| M0012 |             | 0.80034 |      |     |                |                |
| 7     | V\$GATA1_03 | 3       | 4866 | (+) | RNSNNGATAANNGN | GTCTAGATTATCAG |
| M0007 |             | 0.78726 |      |     |                |                |
| 5     | V\$GATA1_01 | 6       | 4868 | (+) | SNNGATNNNN     | CTAGATTATC     |
| M0012 |             | 0.81156 |      |     |                |                |
| 6     | V\$GATA1_02 | 2       | 4869 | (-) | NNNNNGATANKGNN | TAGATTATCAGAAT |
| M0012 |             | 0.81234 |      |     |                |                |
| 7     | V\$GATA1_03 | 7       | 4869 | (-) | RNSNNGATAANNGN | TAGATTATCAGAAT |
| M0012 |             |         |      |     |                |                |
| 8     | V\$GATA1_04 | 0.85386 | 4869 | (-) | NNCWGATARNNNN  | TAGATTATCAGAA  |
| M0007 |             | 0.82773 |      |     |                |                |
| 5     | V\$GATA1_01 | 9       | 4871 | (-) | SNNGATNNNN     | GATTATCAGA     |
| M0007 |             | 0.87280 |      |     |                |                |
| 6     | V\$GATA2_01 | 1       | 4871 | (-) | NNNGATRNNN     | GATTATCAGA     |
| M0007 |             | 0.83739 |      |     |                |                |
| 7     | V\$GATA3_01 | 5       | 4871 | (-) | NNGATARNG      | GATTATCAG      |
| M0020 |             | 0.84001 |      |     |                |                |
| 3     | V\$GATA_C   | 2       | 4967 | (-) | NGATAAGNMNN    | AGTCTCTGTCT    |
| M0012 |             | 0.79813 |      |     |                |                |
| 7     | V\$GATA1_03 | 8       | 4993 | (-) | RNSNNGATAANNGN | TCTATTATTTTTT  |
| M0007 |             |         |      |     |                |                |
| 6     | V\$GATA2_01 | 0.78304 | 5111 | (-) | NNNGATRNNN     | AATTATGACC     |
| M0007 |             | 0.86821 |      |     |                |                |
| 5     | V\$GATA1_01 | 3       | 5119 | (-) | SNNGATNNNN     | CCTCATCGCA     |
| M0007 |             | 0.87550 |      |     |                |                |
| 6     | V\$GATA2_01 | 7       | 5119 | (-) | NNNGATRNNN     | CCTCATCGCA     |
| M0007 |             | 0.88834 |      |     |                |                |
| 7     | V\$GATA3_01 | 7       | 5119 | (-) | NNGATARNG      | CCTCATCGC      |
| M0007 |             | 0.82724 |      |     |                |                |
| 5     | V\$GATA1_01 | 6       | 5217 | (-) | SNNGATNNNN     | TGCAATCCAG     |
| M0007 |             | 0.79747 |      |     |                |                |
| 6     | V\$GATA2_01 | 4       | 5217 | (-) | NNNGATRNNN     | TGCAATCCAG     |
| M0007 |             | 0.83662 |      |     |                |                |
| 5     | V\$GATA1_01 | 4       | 5259 | (+) | SNNGATNNNN     | GTTGATTTTT     |
| M0007 |             | 0.87265 |      |     |                |                |
| 5     | V\$GATA1_01 | 5       | 5341 | (-) | SNNGATNNNN     | AAAAATCATC     |
| M0007 |             | 0.83310 |      |     |                |                |
| 6     | V\$GATA2_01 | 8       | 5341 | (-) | NNNGATRNNN     | AAAAATCATC     |
| M0007 |             | 0.80108 |      |     |                |                |
| 5     | V\$GATA1_01 | 6       | 5344 | (-) | SNNGATNNNN     | AATCATCTTA     |
| M0007 |             |         |      |     |                |                |
| 6     | V\$GATA2_01 | 0.85115 | 5344 | (-) | NNNGATRNNN     | AATCATCTTA     |
| M0012 |             | 0.80401 |      |     |                |                |
| 7     | V\$GATA1_03 | 8       | 5348 | (+) | RNSNNGATAANNGN | ATCTTAATAGGAGG |
| M0012 |             | 0.78312 |      |     |                |                |
| 6     | V\$GATA1_02 | 5       | 5450 | (-) | NNNNNGATANKGNN | GCAAATATCACGTG |
| M0012 |             | 0.78833 |      |     |                |                |
| 7     | V\$GATA1_03 | 9       | 5450 | (-) | RNSNNGATAANNGN | GCAAATATCACGTG |
| M0012 |             | 0.83118 |      |     |                |                |
| 8     | V\$GATA1_04 | 9       | 5450 | (-) | NNCWGATARNNNN  | GCAAATATCACGT  |
| M0007 |             | 0.92941 |      |     |                |                |
| 5     | V\$GATA1_01 | 8       | 5452 | (-) | SNNGATNNNN     | AAATATCACG     |
| M0007 |             | 0.90031 |      |     |                |                |
| 6     | V\$GATA2_01 | 6       | 5452 | (-) | NNNGATRNNN     | AAATATCACG     |
| M0007 |             | 0.82853 |      |     |                |                |
| 7     | V\$GATA3_01 | 3       | 5452 | (-) | NNGATARNG      | AAATATCAC      |
| M0007 |             | 0.80700 |      |     |                |                |
| 5     | V\$GATA1_01 | 9       | 5482 | (+) | SNNGATNNNN     | TCAGATGATC     |
| M0007 |             | 0.85566 |      |     |                |                |
| 6     | V\$GATA2_01 | 1       | 5482 | (+) | NNNGATRNNN     | TCAGATGATC     |

|       |             |         |      |     |                |                |
|-------|-------------|---------|------|-----|----------------|----------------|
| M0007 |             | 0.79121 |      |     |                |                |
| 5     | V\$GATA1_01 | 4       | 5485 | (+) | SNNGATNNNN     | GATGATCACA     |
| M0007 |             | 0.78430 |      |     |                |                |
| 5     | V\$GATA1_01 | 4       | 5485 | (-) | SNNGATNNNN     | GATGATCACA     |
| M0007 |             | 0.80739 |      |     |                |                |
| 6     | V\$GATA2_01 | 7       | 5485 | (+) | NNNGATRNNN     | GATGATCACA     |
| M0007 |             |         |      |     |                |                |
| 6     | V\$GATA2_01 | 0.8083  | 5485 | (-) | NNNGATRNNN     | GATGATCACA     |
| M0012 |             | 0.79348 |      |     |                |                |
| 7     | V\$GATA1_03 | 4       | 5509 | (-) | RNSNNGATAANNGN | GAATTTTCTCCCT  |
| M0007 |             | 0.80799 |      |     |                |                |
| 5     | V\$GATA1_01 | 6       | 5527 | (+) | SNNGATNNNN     | AATGATTTTT     |
| M0007 |             | 0.78619 |      |     |                |                |
| 6     | V\$GATA2_01 | 8       | 5527 | (+) | NNNGATRNNN     | AATGATTTTT     |
| M0012 |             | 0.78417 |      |     |                |                |
| 7     | V\$GATA1_03 | 4       | 5559 | (-) | RNSNNGATAANNGN | TTCATTATTACTAT |
| M0007 |             | 0.80602 |      |     |                |                |
| 5     | V\$GATA1_01 | 2       | 5580 | (-) | SNNGATNNNN     | GTATATCACT     |
| M0007 |             | 0.81506 |      |     |                |                |
| 6     | V\$GATA2_01 | 5       | 5580 | (-) | NNNGATRNNN     | GTATATCACT     |
| M0007 |             |         |      |     |                |                |
| 7     | V\$GATA3_01 | 0.82942 | 5619 | (+) | NNGATARNG      | TAGATTAGT      |
| M0020 |             | 0.86672 |      |     |                |                |
| 3     | V\$GATA_C   | 9       | 5685 | (-) | NGATAAGNMNN    | ATGTTTTGTCT    |
| M0012 |             |         |      |     |                |                |
| 6     | V\$GATA1_02 | 0.8225  | 5704 | (-) | NNNNNGATANKGNN | AAAGGTATCTTTAA |
| M0007 |             | 0.83218 |      |     |                |                |
| 5     | V\$GATA1_01 | 2       | 5706 | (-) | SNNGATNNNN     | AGGTATCTTT     |
| M0007 |             | 0.89219 |      |     |                |                |
| 6     | V\$GATA2_01 | 7       | 5706 | (-) | NNNGATRNNN     | AGGTATCTTT     |
| M0007 |             | 0.82033 |      |     |                |                |
| 5     | V\$GATA1_01 | 6       | 5727 | (-) | SNNGATNNNN     | AAAAATCTAG     |
| M0020 |             | 0.83379 |      |     |                |                |
| 3     | V\$GATA_C   | 9       | 5769 | (-) | NGATAAGNMNN    | ATTACTTCTCT    |
| M0012 |             | 0.81096 |      |     |                |                |
| 8     | V\$GATA1_04 | 8       | 5770 | (-) | NNCWGATARNNNN  | TTACTTCTCTGAA  |
| M0007 |             | 0.81737 |      |     |                |                |
| 5     | V\$GATA1_01 | 4       | 5778 | (-) | SNNGATNNNN     | CTGAATCTCA     |
| M0007 |             | 0.82228 |      |     |                |                |
| 6     | V\$GATA2_01 | 2       | 5778 | (-) | NNNGATRNNN     | CTGAATCTCA     |
| M0007 |             | 0.84625 |      |     |                |                |
| 7     | V\$GATA3_01 | 6       | 5778 | (-) | NNGATARNG      | CTGAATCTC      |
| M0020 |             | 0.83659 |      |     |                |                |
| 3     | V\$GATA_C   | 5       | 5844 | (+) | NGATAAGNMNN    | AGACATGGACT    |
| M0012 |             | 0.81687 |      |     |                |                |
| 6     | V\$GATA1_02 | 5       | 5890 | (+) | NNNNNGATANKGNN | TTAATGATATTAAA |
| M0012 |             | 0.81158 |      |     |                |                |
| 8     | V\$GATA1_04 | 1       | 5891 | (+) | NNCWGATARNNNN  | TAATGATATTAAA  |
| M0007 |             |         |      |     |                |                |
| 5     | V\$GATA1_01 | 0.79615 | 5892 | (+) | SNNGATNNNN     | AATGATATTA     |
| M0007 |             | 0.82092 |      |     |                |                |
| 6     | V\$GATA2_01 | 9       | 5892 | (+) | NNNGATRNNN     | AATGATATTA     |
| M0007 |             | 0.84315 |      |     |                |                |
| 7     | V\$GATA3_01 | 5       | 5893 | (+) | NNGATARNG      | ATGATATTA      |
| M0012 |             | 0.78466 |      |     |                |                |
| 7     | V\$GATA1_03 | 4       | 5949 | (-) | RNSNNGATAANNGN | CTAATAATCTGTGT |
| M0007 |             | 0.78973 |      |     |                |                |
| 5     | V\$GATA1_01 | 3       | 5951 | (-) | SNNGATNNNN     | AATAATCTGT     |
| M0007 |             | 0.79070 |      |     |                |                |
| 6     | V\$GATA2_01 | 8       | 5951 | (-) | NNNGATRNNN     | AATAATCTGT     |
| M0007 |             | 0.82720 |      |     |                |                |
| 7     | V\$GATA3_01 | 4       | 5951 | (-) | NNGATARNG      | AATAATCTG      |
| M0007 |             | 0.83415 |      |     |                |                |
| 5     | V\$GATA1_01 | 6       | 5966 | (-) | SNNGATNNNN     | AGTCATCAGT     |
| M0007 |             | 0.83446 |      |     |                |                |
| 6     | V\$GATA2_01 | 1       | 5966 | (-) | NNNGATRNNN     | AGTCATCAGT     |

|       |             |         |      |     |                |                |
|-------|-------------|---------|------|-----|----------------|----------------|
| M0007 |             | 0.81885 |      |     |                |                |
| 5     | V\$GATA1_01 | 5       | 5977 | (-) | SNNGATNNNN     | AGCAATCAAT     |
| M0007 |             | 0.88450 |      |     |                |                |
| 5     | V\$GATA1_01 | 1       | 5981 | (-) | SNNGATNNNN     | ATCAATCATG     |
| M0007 |             | 0.82408 |      |     |                |                |
| 6     | V\$GATA2_01 | 7       | 5981 | (-) | NNNGATRNNN     | ATCAATCATG     |
| M0007 |             |         |      |     |                |                |
| 6     | V\$GATA2_01 | 0.78304 | 5994 | (-) | NNNGATRNNN     | ATTAATCTCA     |
| M0007 |             | 0.83030 |      |     |                |                |
| 7     | V\$GATA3_01 | 6       | 5994 | (-) | NNGATARNG      | ATTAATCTC      |
| M0007 |             | 0.85636 |      |     |                |                |
| 5     | V\$GATA1_01 | 7       | 6014 | (-) | SNNGATNNNN     | AAAAATCTTG     |
| M0007 |             | 0.83897 |      |     |                |                |
| 6     | V\$GATA2_01 | 2       | 6014 | (-) | NNNGATRNNN     | AAAAATCTTG     |
| M0012 |             | 0.88853 |      |     |                |                |
| 7     | V\$GATA1_03 | 5       | 6020 | (-) | RNSNNGATAANNGN | CTTGGTATCATCTT |
| M0012 |             | 0.82444 |      |     |                |                |
| 8     | V\$GATA1_04 | 9       | 6020 | (-) | NNCWGATARNNNN  | CTTGGTATCATCT  |
| M0007 |             | 0.88203 |      |     |                |                |
| 5     | V\$GATA1_01 | 4       | 6022 | (-) | SNNGATNNNN     | TGGTATCATC     |
| M0007 |             |         |      |     |                |                |
| 6     | V\$GATA2_01 | 0.89806 | 6022 | (-) | NNNGATRNNN     | TGGTATCATC     |
| M0007 |             |         |      |     |                |                |
| 6     | V\$GATA2_01 | 0.82138 | 6025 | (-) | NNNGATRNNN     | TATCATCTTA     |
| M0007 |             | 0.84492 |      |     |                |                |
| 7     | V\$GATA3_01 | 7       | 6025 | (-) | NNGATARNG      | TATCATCTT      |
| M0012 |             |         |      |     |                |                |
| 6     | V\$GATA1_02 | 0.78375 | 6070 | (+) | NNNNNGATANKGNN | TTAGCAATAAGAGA |
| M0007 |             | 0.84698 |      |     |                |                |
| 5     | V\$GATA1_01 | 9       | 6174 | (-) | SNNGATNNNN     | ATCCATCTCT     |
| M0007 |             | 0.83806 |      |     |                |                |
| 6     | V\$GATA2_01 | 9       | 6174 | (-) | NNNGATRNNN     | ATCCATCTCT     |
| M0007 |             | 0.83872 |      |     |                |                |
| 7     | V\$GATA3_01 | 4       | 6174 | (-) | NNGATARNG      | ATCCATCTC      |
| M0012 |             |         |      |     |                |                |
| 6     | V\$GATA1_02 | 0.7925  | 6197 | (-) | NNNNNGATANKGNN | ACACTTATATTTAC |
| M0012 |             | 0.79519 |      |     |                |                |
| 7     | V\$GATA1_03 | 8       | 6197 | (-) | RNSNNGATAANNGN | ACACTTATATTTAC |
| M0012 |             | 0.78711 |      |     |                |                |
| 7     | V\$GATA1_03 | 4       | 6206 | (-) | RNSNNGATAANNGN | TTTACTTTCTCCTT |
| M0007 |             | 0.84896 |      |     |                |                |
| 5     | V\$GATA1_01 | 3       | 6311 | (+) | SNNGATNNNN     | GTIGATTTGT     |
| M0007 |             | 0.79476 |      |     |                |                |
| 6     | V\$GATA2_01 | 8       | 6345 | (+) | NNNGATRNNN     | TGACATATTT     |
| M0007 |             | 0.79070 |      |     |                |                |
| 6     | V\$GATA2_01 | 8       | 6363 | (+) | NNNGATRNNN     | GCACATAATC     |
| M0007 |             | 0.85201 |      |     |                |                |
| 7     | V\$GATA3_01 | 6       | 6366 | (-) | NNGATARNG      | CATAATCAA      |
| M0012 |             |         |      |     |                |                |
| 6     | V\$GATA1_02 | 0.79    | 6408 | (+) | NNNNNGATANKGNN | TTACTGATATTTAA |
| M0012 |             | 0.83088 |      |     |                |                |
| 8     | V\$GATA1_04 | 2       | 6409 | (+) | NNCWGATARNNNN  | TACTGATATTTAA  |
| M0007 |             | 0.85241 |      |     |                |                |
| 5     | V\$GATA1_01 | 9       | 6410 | (+) | SNNGATNNNN     | ACTGATATTT     |
| M0007 |             | 0.85881 |      |     |                |                |
| 6     | V\$GATA2_01 | 8       | 6410 | (+) | NNNGATRNNN     | ACTGATATTT     |
| M0012 |             | 0.85281 |      |     |                |                |
| 6     | V\$GATA1_02 | 2       | 6419 | (+) | NNNNNGATANKGNN | TAACAGATAAAATT |
| M0012 |             | 0.90808 |      |     |                |                |
| 8     | V\$GATA1_04 | 8       | 6420 | (+) | NNCWGATARNNNN  | AACAGATAAAATT  |
| M0007 |             | 0.78529 |      |     |                |                |
| 6     | V\$GATA2_01 | 5       | 6421 | (+) | NNNGATRNNN     | ACAGATAAAA     |
| M0007 |             |         |      |     |                |                |
| 7     | V\$GATA3_01 | 0.87284 | 6422 | (+) | NNGATARNG      | CAGATAAAA      |
| M0020 |             |         |      |     |                |                |
| 3     | V\$GATA_C   | 0.90028 | 6423 | (+) | NGATAAGNMNN    | AGATAAAATTA    |

|       |             |         |      |     |                 |                 |
|-------|-------------|---------|------|-----|-----------------|-----------------|
| M0007 |             | 0.80009 |      |     |                 |                 |
| 5     | V\$GATA1_01 | 9       | 6454 | (-) | SNNGATNNNN      | ATACATCCAG      |
| M0007 |             | 0.83218 |      |     |                 |                 |
| 5     | V\$GATA1_01 | 2       | 6472 | (-) | SNNGATNNNN      | CTACATCACT      |
| M0007 |             | 0.80333 |      |     |                 |                 |
| 6     | V\$GATA2_01 | 8       | 6472 | (-) | NNNGATRNNN      | CTACATCACT      |
| M0007 |             | 0.82188 |      |     |                 |                 |
| 7     | V\$GATA3_01 | 7       | 6472 | (-) | NNGATARNG       | CTACATCAC       |
| M0012 |             | 0.84436 |      |     |                 |                 |
| 8     | V\$GATA1_04 | 3       | 6493 | (+) | NNCWGATARNNNN   | TTCTGATATAATT   |
| M0007 |             | 0.78578 |      |     |                 |                 |
| 5     | V\$GATA1_01 | 5       | 6494 | (+) | SNNGATNNNN      | TCTGATATAA      |
| M0007 |             |         |      |     |                 |                 |
| 6     | V\$GATA2_01 | 0.82138 | 6494 | (+) | NNNGATRNNN      | TCTGATATAA      |
| M0007 |             | 0.89733 |      |     |                 |                 |
| 5     | V\$GATA1_01 | 5       | 6516 | (+) | SNNGATNNNN      | GGGGATGTGC      |
| M0007 |             | 0.90572 |      |     |                 |                 |
| 6     | V\$GATA2_01 | 8       | 6516 | (+) | NNNGATRNNN      | GGGGATGTGC      |
| M0012 |             | 0.79031 |      |     |                 |                 |
| 6     | V\$GATA1_02 | 2       | 6530 | (-) | NNNNNGATANKGNN  | AGCCTTCTCTCTAG  |
| M0007 |             | 0.84758 |      |     |                 |                 |
| 7     | V\$GATA3_01 | 5       | 6532 | (-) | NNGATARNG       | CCTTCTCTC       |
| M0007 |             |         |      |     |                 |                 |
| 6     | V\$GATA2_01 | 0.81687 | 6657 | (-) | NNNGATRNNN      | GAGTATGCCA      |
| M0007 |             | 0.79296 |      |     |                 |                 |
| 6     | V\$GATA2_01 | 3       | 6672 | (-) | NNNGATRNNN      | CTCTATGAGA      |
| M0007 |             | 0.83662 |      |     |                 |                 |
| 5     | V\$GATA1_01 | 4       | 6677 | (+) | SNNGATNNNN      | TGAGATTTGT      |
| M0007 |             | 0.84438 |      |     |                 |                 |
| 6     | V\$GATA2_01 | 4       | 6677 | (+) | NNNGATRNNN      | TGAGATTTGT      |
| M0007 |             | 0.83916 |      |     |                 |                 |
| 7     | V\$GATA3_01 | 7       | 6678 | (+) | NNGATARNG       | GAGATTTGT       |
| M0020 |             | 0.85461 |      |     |                 |                 |
| 3     | V\$GATA_C   | 3       | 6678 | (-) | NGATAAGNMNN     | GAGATTGTCT      |
| M0020 |             | 0.90773 |      |     |                 |                 |
| 3     | V\$GATA_C   | 5       | 6767 | (-) | NGATAAGNMNN     | ATGAATTATCT     |
| M0012 |             | 0.80812 |      |     |                 |                 |
| 6     | V\$GATA1_02 | 5       | 6768 | (-) | NNNNNGATANKGNN  | TGAATTATCTTACC  |
| M0012 |             | 0.79911 |      |     |                 |                 |
| 7     | V\$GATA1_03 | 8       | 6768 | (-) | RNSNNGATAANNGN  | TGAATTATCTTACC  |
| M0012 |             | 0.88051 |      |     |                 |                 |
| 8     | V\$GATA1_04 | 5       | 6768 | (-) | NNCWGATARNNNN   | TGAATTATCTTAC   |
| M0007 |             | 0.80108 |      |     |                 |                 |
| 5     | V\$GATA1_01 | 6       | 6770 | (-) | SNNGATNNNN      | AATTATCTTA      |
| M0007 |             | 0.87956 |      |     |                 |                 |
| 6     | V\$GATA2_01 | 7       | 6770 | (-) | NNNGATRNNN      | AATTATCTTA      |
| M0007 |             | 0.86663 |      |     |                 |                 |
| 7     | V\$GATA3_01 | 7       | 6770 | (-) | NNGATARNG       | AATTATCTT       |
| M0021 |             | 0.88671 |      |     |                 |                 |
| 6     | V\$TATA_C   | 8       | 17   | (+) | NCTATAAAAR      | GCTTTATAAA      |
| M0025 |             | 0.83303 |      |     |                 |                 |
| 2     | V\$TATA_01  | 7       | 18   | (+) | STATAAAWRNNNNNN | CTTTATAAATGACAA |
| M0021 |             | 0.80512 |      |     |                 |                 |
| 6     | V\$TATA_C   | 3       | 19   | (+) | NCTATAAAAR      | TTTATAAATG      |
| M0025 |             | 0.88936 |      |     |                 |                 |
| 2     | V\$TATA_01  | 8       | 20   | (+) | STATAAAWRNNNNNN | TTATAAATGACAAC  |
| M0025 |             | 0.79142 |      |     |                 |                 |
| 2     | V\$TATA_01  | 3       | 142  | (+) | STATAAAWRNNNNNN | AGATAAATCACATGC |
| M0025 |             |         |      |     |                 |                 |
| 2     | V\$TATA_01  | 0.78508 | 341  | (+) | STATAAAWRNNNNNN | GTTTTTATTGCTAAG |
| M0021 |             | 0.79297 |      |     |                 |                 |
| 6     | V\$TATA_C   | 6       | 410  | (+) | NCTATAAAAR      | TCTGTATAAT      |
| M0025 |             | 0.79599 |      |     |                 |                 |
| 2     | V\$TATA_01  | 1       | 545  | (+) | STATAAAWRNNNNNN | ACATATGTGGAGGGC |
| M0021 |             | 0.75442 |      |     |                 |                 |
| 6     | V\$TATA_C   | 3       | 583  | (+) | NCTATAAAAR      | GTCATAATAA      |

|       |            |         |      |     |                 |                 |
|-------|------------|---------|------|-----|-----------------|-----------------|
| M0025 |            | 0.77061 |      |     |                 |                 |
| 2     | V\$TATA_01 | 7       | 584  | (+) | STATAAAWRNNNNNN | TCATAATAATCCAGA |
| M0021 |            | 0.82360 |      |     |                 |                 |
| 6     | V\$TATA_C  | 7       | 613  | (+) | NCTATAAAAR      | AATTTAAAAAT     |
| M0021 |            | 0.80221 |      |     |                 |                 |
| 6     | V\$TATA_C  | 8       | 630  | (+) | NCTATAAAAR      | TCTATCTAAA      |
| M0021 |            | 0.75891 |      |     |                 |                 |
| 6     | V\$TATA_C  | 2       | 639  | (+) | NCTATAAAAR      | AGATTATAAT      |
| M0021 |            | 0.76815 |      |     |                 |                 |
| 6     | V\$TATA_C  | 4       | 669  | (+) | NCTATAAAAR      | TTTTTTAAAA      |
| M0021 |            | 0.89015 |      |     |                 |                 |
| 6     | V\$TATA_C  | 1       | 670  | (+) | NCTATAAAAR      | TTTTTAAAAA      |
| M0021 |            | 0.75072 |      |     |                 |                 |
| 6     | V\$TATA_C  | 6       | 671  | (+) | NCTATAAAAR      | TTTTAAAAAT      |
| M0025 |            | 0.78228 |      |     |                 |                 |
| 2     | V\$TATA_01 | 9       | 671  | (+) | STATAAAWRNNNNNN | TTTTAAAAATTATGA |
| M0025 |            | 0.77239 |      |     |                 |                 |
| 2     | V\$TATA_01 | 3       | 687  | (+) | STATAAAWRNNNNNN | TTACATATCCTCACG |
| M0021 |            | 0.77898 |      |     |                 |                 |
| 6     | V\$TATA_C  | 1       | 803  | (+) | NCTATAAAAR      | TGCTAAAAAA      |
| M0021 |            | 0.86612 |      |     |                 |                 |
| 6     | V\$TATA_C  | 1       | 804  | (+) | NCTATAAAAR      | GCTAAAAAAG      |
| M0025 |            | 0.82593 |      |     |                 |                 |
| 2     | V\$TATA_01 | 3       | 805  | (+) | STATAAAWRNNNNNN | CTAAAAAAGAGGATC |
| M0025 |            | 0.77366 |      |     |                 |                 |
| 2     | V\$TATA_01 | 2       | 855  | (+) | STATAAAWRNNNNNN | GTGTAAATCTGTATA |
| M0025 |            | 0.77442 |      |     |                 |                 |
| 2     | V\$TATA_01 | 3       | 865  | (+) | STATAAAWRNNNNNN | GTATATGTGTTATAA |
| M0021 |            | 0.85951 |      |     |                 |                 |
| 6     | V\$TATA_C  | 9       | 926  | (+) | NCTATAAAAR      | ACTACAAAAA      |
| M0025 |            | 0.83151 |      |     |                 |                 |
| 2     | V\$TATA_01 | 5       | 927  | (+) | STATAAAWRNNNNNN | CTACAAAAAAGAAAT |
| M0025 |            | 0.80487 |      |     |                 |                 |
| 2     | V\$TATA_01 | 2       | 998  | (+) | STATAAAWRNNNNNN | CAATATATAAATATA |
| M0021 |            | 0.80221 |      |     |                 |                 |
| 6     | V\$TATA_C  | 8       | 999  | (+) | NCTATAAAAR      | AATATATAAA      |
| M0025 |            | 0.87769 |      |     |                 |                 |
| 2     | V\$TATA_01 | 6       | 1000 | (+) | STATAAAWRNNNNNN | ATATATAAATATATC |
| M0021 |            | 0.75178 |      |     |                 |                 |
| 6     | V\$TATA_C  | 2       | 1001 | (+) | NCTATAAAAR      | TATATAAATA      |
| M0025 |            | 0.85587 |      |     |                 |                 |
| 2     | V\$TATA_01 | 4       | 1002 | (+) | STATAAAWRNNNNNN | ATATAAATATATCAA |
| M0021 |            |         |      |     |                 |                 |
| 6     | V\$TATA_C  | 0.79456 | 1025 | (+) | NCTATAAAAR      | GTCATATAAT      |
| M0025 |            | 0.80893 |      |     |                 |                 |
| 2     | V\$TATA_01 | 2       | 1033 | (+) | STATAAAWRNNNNNN | ATTTAAATTTACACA |
| M0021 |            | 0.76472 |      |     |                 |                 |
| 6     | V\$TATA_C  | 1       | 1070 | (+) | NCTATAAAAR      | GTGTTAAAAA      |
| M0021 |            | 0.80644 |      |     |                 |                 |
| 6     | V\$TATA_C  | 3       | 1071 | (+) | NCTATAAAAR      | TGTTAAAAAA      |
| M0021 |            | 0.76445 |      |     |                 |                 |
| 6     | V\$TATA_C  | 7       | 1072 | (+) | NCTATAAAAR      | GTAAAAAAAT      |
| M0025 |            |         |      |     |                 |                 |
| 2     | V\$TATA_01 | 0.82238 | 1106 | (+) | STATAAAWRNNNNNN | GAATTAATAGGGAAC |
| M0021 |            | 0.74306 |      |     |                 |                 |
| 6     | V\$TATA_C  | 8       | 1131 | (+) | NCTATAAAAR      | TCATTGAAAT      |
| M0021 |            | 0.75547 |      |     |                 |                 |
| 6     | V\$TATA_C  | 9       | 1190 | (+) | NCTATAAAAR      | CCTATCAGAG      |
| M0021 |            | 0.75917 |      |     |                 |                 |
| 6     | V\$TATA_C  | 6       | 1225 | (+) | NCTATAAAAR      | TCTTTCTAAT      |
| M0021 |            | 0.75151 |      |     |                 |                 |
| 6     | V\$TATA_C  | 8       | 1247 | (+) | NCTATAAAAR      | TGAATCAAAA      |
| M0021 |            |         |      |     |                 |                 |
| 6     | V\$TATA_C  | 0.77502 | 1316 | (+) | NCTATAAAAR      | CTTGTA AAC      |
| M0021 |            | 0.87985 |      |     |                 |                 |
| 6     | V\$TATA_C  | 2       | 1345 | (+) | NCTATAAAAR      | TCTATACAAG      |

|       |            |         |      |     |                 |                  |
|-------|------------|---------|------|-----|-----------------|------------------|
| M0025 |            | 0.80106 |      |     |                 |                  |
| 2     | V\$TATA_01 | 6       | 1346 | (+) | STATAAAWRNNNNNN | CTATACAAGTAGGTC  |
| M0021 |            | 0.79746 |      |     |                 |                  |
| 6     | V\$TATA_C  | 5       | 1359 | (+) | NCTATAAAAR      | TCAATAACAG       |
| M0021 |            | 0.74465 |      |     |                 |                  |
| 6     | V\$TATA_C  | 3       | 1422 | (+) | NCTATAAAAR      | AATATTAAAA       |
| M0021 |            | 0.81383 |      |     |                 |                  |
| 6     | V\$TATA_C  | 7       | 1423 | (+) | NCTATAAAAR      | ATATTAAAAG       |
| M0025 |            | 0.83024 |      |     |                 |                  |
| 2     | V\$TATA_01 | 6       | 1423 | (+) | STATAAAWRNNNNNN | ATATTAAAAAGCTTAA |
| M0021 |            | 0.75442 |      |     |                 |                  |
| 6     | V\$TATA_C  | 3       | 1431 | (+) | NCTATAAAAR      | AGCTTAAACT       |
| M0021 |            | 0.77660 |      |     |                 |                  |
| 6     | V\$TATA_C  | 4       | 1451 | (+) | NCTATAAAAR      | TCTTTCTAAA       |
| M0021 |            | 0.80195 |      |     |                 |                  |
| 6     | V\$TATA_C  | 4       | 1453 | (+) | NCTATAAAAR      | TTTCTAAAAA       |
| M0021 |            | 0.75204 |      |     |                 |                  |
| 6     | V\$TATA_C  | 6       | 1454 | (+) | NCTATAAAAR      | TTCTAAAAAG       |
| M0021 |            | 0.74465 |      |     |                 |                  |
| 6     | V\$TATA_C  | 3       | 1455 | (+) | NCTATAAAAR      | TCTAAAAAGA       |
| M0021 |            | 0.76102 |      |     |                 |                  |
| 6     | V\$TATA_C  | 5       | 1467 | (+) | NCTATAAAAR      | ATTTTTAAAA       |
| M0021 |            | 0.89015 |      |     |                 |                  |
| 6     | V\$TATA_C  | 1       | 1468 | (+) | NCTATAAAAR      | TTTTTAAAAA       |
| M0021 |            | 0.76815 |      |     |                 |                  |
| 6     | V\$TATA_C  | 4       | 1469 | (+) | NCTATAAAAR      | TTTTAAAAAA       |
| M0025 |            | 0.80411 |      |     |                 |                  |
| 2     | V\$TATA_01 | 1       | 1469 | (+) | STATAAAWRNNNNNN | TTTTAAAAAATCAAA  |
| M0021 |            |         |      |     |                 |                  |
| 6     | V\$TATA_C  | 0.77634 | 1470 | (+) | NCTATAAAAR      | TTTAAAAAAT       |
| M0021 |            | 0.84235 |      |     |                 |                  |
| 6     | V\$TATA_C  | 5       | 1507 | (+) | NCTATAAAAR      | CCTTTAGAAA       |
| M0021 |            | 0.84103 |      |     |                 |                  |
| 6     | V\$TATA_C  | 5       | 1534 | (+) | NCTATAAAAR      | TCTTTAAATA       |
| M0025 |            | 0.81070 |      |     |                 |                  |
| 2     | V\$TATA_01 | 8       | 1535 | (+) | STATAAAWRNNNNNN | CTTTAAATATTTTCAG |
| M0021 |            | 0.79376 |      |     |                 |                  |
| 6     | V\$TATA_C  | 8       | 1580 | (+) | NCTATAAAAR      | TTTATTAAAA       |
| M0021 |            | 0.78320 |      |     |                 |                  |
| 6     | V\$TATA_C  | 6       | 1581 | (+) | NCTATAAAAR      | TTATTAAAC        |
| M0025 |            | 0.81882 |      |     |                 |                  |
| 2     | V\$TATA_01 | 8       | 1581 | (+) | STATAAAWRNNNNNN | TTATTAAACAATCA   |
| M0021 |            | 0.76287 |      |     |                 |                  |
| 6     | V\$TATA_C  | 3       | 1712 | (+) | NCTATAAAAR      | ATTTTAGAAA       |
| M0025 |            |         |      |     |                 |                  |
| 2     | V\$TATA_01 | 0.78102 | 1737 | (+) | STATAAAWRNNNNNN | TCATTTATAGGTAAG  |
| M0021 |            | 0.77422 |      |     |                 |                  |
| 6     | V\$TATA_C  | 8       | 1762 | (+) | NCTATAAAAR      | CCCAGATAAA       |
| M0021 |            | 0.80829 |      |     |                 |                  |
| 6     | V\$TATA_C  | 2       | 1889 | (+) | NCTATAAAAR      | TGTTTACAAA       |
| M0025 |            | 0.78051 |      |     |                 |                  |
| 2     | V\$TATA_01 | 3       | 1890 | (+) | STATAAAWRNNNNNN | GTTTACAAAGCCTTG  |
| M0021 |            | 0.77475 |      |     |                 |                  |
| 6     | V\$TATA_C  | 6       | 1983 | (+) | NCTATAAAAR      | TCCATTTAAA       |
| M0021 |            |         |      |     |                 |                  |
| 6     | V\$TATA_C  | 0.74254 | 1984 | (+) | NCTATAAAAR      | CCATTTAAAT       |
| M0025 |            | 0.80182 |      |     |                 |                  |
| 2     | V\$TATA_01 | 7       | 1984 | (+) | STATAAAWRNNNNNN | CCATTTAAATGCCCA  |
| M0025 |            | 0.89063 |      |     |                 |                  |
| 2     | V\$TATA_01 | 7       | 1986 | (+) | STATAAAWRNNNNNN | ATTTAAATGCCCATG  |
| M0025 |            | 0.81502 |      |     |                 |                  |
| 2     | V\$TATA_01 | 2       | 2038 | (+) | STATAAAWRNNNNNN | CTATTAATCTCTGCA  |
| M0025 |            | 0.86678 |      |     |                 |                  |
| 2     | V\$TATA_01 | 5       | 2114 | (+) | STATAAAWRNNNNNN | CTATATGTAGAAAGC  |
| M0021 |            | 0.76366 |      |     |                 |                  |
| 6     | V\$TATA_C  | 5       | 2157 | (+) | NCTATAAAAR      | CCTCTAACAG       |

|       |            |         |      |     |                 |                 |
|-------|------------|---------|------|-----|-----------------|-----------------|
| M0021 |            | 0.75864 |      |     |                 |                 |
| 6     | V\$TATA_C  | 8       | 2233 | (+) | NCTATAAAAR      | CCTTGATAAT      |
| M0021 |            | 0.77660 |      |     |                 |                 |
| 6     | V\$TATA_C  | 4       | 2266 | (+) | NCTATAAAAR      | TCTTTATATA      |
| M0025 |            | 0.83430 |      |     |                 |                 |
| 2     | V\$TATA_01 | 6       | 2267 | (+) | STATAAAWRNNNNNN | CTTTATATATATAAG |
| M0025 |            | 0.84927 |      |     |                 |                 |
| 2     | V\$TATA_01 | 7       | 2269 | (+) | STATAAAWRNNNNNN | TTATATATATAAGCT |
| M0025 |            | 0.86044 |      |     |                 |                 |
| 2     | V\$TATA_01 | 2       | 2271 | (+) | STATAAAWRNNNNNN | ATATATATAAGCTAA |
| M0021 |            | 0.82070 |      |     |                 |                 |
| 6     | V\$TATA_C  | 2       | 2272 | (+) | NCTATAAAAR      | TATATATAAG      |
| M0025 |            | 0.87744 |      |     |                 |                 |
| 2     | V\$TATA_01 | 2       | 2273 | (+) | STATAAAWRNNNNNN | ATATATAAGCTAAAA |
| M0025 |            | 0.83329 |      |     |                 |                 |
| 2     | V\$TATA_01 | 1       | 2291 | (+) | STATAAAWRNNNNNN | TTATTTATAGGTAAG |
| M0021 |            | 0.87747 |      |     |                 |                 |
| 6     | V\$TATA_C  | 6       | 2313 | (+) | NCTATAAAAR      | CCTATAAATG      |
| M0025 |            | 0.91448 |      |     |                 |                 |
| 2     | V\$TATA_01 | 9       | 2314 | (+) | STATAAAWRNNNNNN | CTATAAATGTACATA |
| M0025 |            | 0.77112 |      |     |                 |                 |
| 2     | V\$TATA_01 | 4       | 2322 | (+) | STATAAAWRNNNNNN | GTACATATATATTTA |
| M0025 |            | 0.78863 |      |     |                 |                 |
| 2     | V\$TATA_01 | 2       | 2324 | (+) | STATAAAWRNNNNNN | ACATATATATTTATA |
| M0025 |            | 0.85688 |      |     |                 |                 |
| 2     | V\$TATA_01 | 9       | 2326 | (+) | STATAAAWRNNNNNN | ATATATATTTATAGG |
| M0025 |            | 0.78533 |      |     |                 |                 |
| 2     | V\$TATA_01 | 4       | 2328 | (+) | STATAAAWRNNNNNN | ATATATTTATAGGCA |
| M0025 |            | 0.87109 |      |     |                 |                 |
| 2     | V\$TATA_01 | 9       | 2330 | (+) | STATAAAWRNNNNNN | ATATTTATAGGCACC |
| M0025 |            | 0.79954 |      |     |                 |                 |
| 2     | V\$TATA_01 | 3       | 2332 | (+) | STATAAAWRNNNNNN | ATTTATAGGCACCAT |
| M0025 |            | 0.87338 |      |     |                 |                 |
| 2     | V\$TATA_01 | 2       | 2361 | (+) | STATAAAWRNNNNNN | TTATATATGTGTATG |
| M0025 |            | 0.78355 |      |     |                 |                 |
| 2     | V\$TATA_01 | 7       | 2363 | (+) | STATAAAWRNNNNNN | ATATATGTGTATGTA |
| M0025 |            | 0.79218 |      |     |                 |                 |
| 2     | V\$TATA_01 | 5       | 2371 | (+) | STATAAAWRNNNNNN | GTATGTATATGTGTA |
| M0025 |            | 0.82821 |      |     |                 |                 |
| 2     | V\$TATA_01 | 6       | 2375 | (+) | STATAAAWRNNNNNN | GTATATGTGTATACA |
| M0025 |            | 0.84775 |      |     |                 |                 |
| 2     | V\$TATA_01 | 4       | 2383 | (+) | STATAAAWRNNNNNN | GTATACATAGGGACA |
| M0025 |            | 0.79649 |      |     |                 |                 |
| 2     | V\$TATA_01 | 8       | 2385 | (+) | STATAAAWRNNNNNN | ATACATAGGGACACA |
| M0021 |            | 0.78188 |      |     |                 |                 |
| 6     | V\$TATA_C  | 5       | 2414 | (+) | NCTATAAAAR      | AGTTTAAAGT      |
| M0021 |            | 0.75600 |      |     |                 |                 |
| 6     | V\$TATA_C  | 7       | 2445 | (+) | NCTATAAAAR      | TCTACAACAG      |
| M0021 |            | 0.84895 |      |     |                 |                 |
| 6     | V\$TATA_C  | 7       | 2453 | (+) | NCTATAAAAR      | AGAATAAAAT      |
| M0025 |            | 0.79243 |      |     |                 |                 |
| 2     | V\$TATA_01 | 8       | 2454 | (+) | STATAAAWRNNNNNN | GAATAAAATTCTCAT |
| M0025 |            |         |      |     |                 |                 |
| 2     | V\$TATA_01 | 0.79117 | 2478 | (+) | STATAAAWRNNNNNN | TTATTTATAAAAAAT |
| M0021 |            | 0.78373 |      |     |                 |                 |
| 6     | V\$TATA_C  | 4       | 2479 | (+) | NCTATAAAAR      | TATTTATAAA      |
| M0025 |            | 0.81045 |      |     |                 |                 |
| 2     | V\$TATA_01 | 4       | 2480 | (+) | STATAAAWRNNNNNN | ATTTATAAAAAATTG |
| M0021 |            | 0.91576 |      |     |                 |                 |
| 6     | V\$TATA_C  | 4       | 2481 | (+) | NCTATAAAAR      | TTTATAAAAA      |
| M0025 |            | 0.85105 |      |     |                 |                 |
| 2     | V\$TATA_01 | 3       | 2482 | (+) | STATAAAWRNNNNNN | TTATAAAAAATTGTG |
| M0021 |            | 0.74914 |      |     |                 |                 |
| 6     | V\$TATA_C  | 2       | 2507 | (+) | NCTATAAAAR      | TCCTTATTAA      |
| M0025 |            | 0.82948 |      |     |                 |                 |
| 2     | V\$TATA_01 | 5       | 2510 | (+) | STATAAAWRNNNNNN | TTATTAATGGCCTAC |



|       |            |         |      |     |                 |                  |
|-------|------------|---------|------|-----|-----------------|------------------|
| M0025 |            | 0.79091 |      |     |                 |                  |
| 2     | V\$TATA_01 | 6       | 2551 | (+) | STATAAAWRNNNNNN | GAATATATGATTAAC  |
| M0025 |            | 0.77010 |      |     |                 |                  |
| 2     | V\$TATA_01 | 9       | 2553 | (+) | STATAAAWRNNNNNN | ATATATGATTAACCT  |
| M0021 |            | 0.75019 |      |     |                 |                  |
| 6     | V\$TATA_C  | 8       | 2578 | (+) | NCTATAAAAR      | CTTTTAATAT       |
| M0025 |            | 0.77416 |      |     |                 |                  |
| 2     | V\$TATA_01 | 9       | 2584 | (+) | STATAAAWRNNNNNN | ATATTATAGCCAAAA  |
| M0021 |            | 0.76815 |      |     |                 |                  |
| 6     | V\$TATA_C  | 4       | 2639 | (+) | NCTATAAAAR      | TTTTTAATAA       |
| M0021 |            | 0.81779 |      |     |                 |                  |
| 6     | V\$TATA_C  | 8       | 2642 | (+) | NCTATAAAAR      | TTAATAAAAT       |
| M0025 |            | 0.83354 |      |     |                 |                  |
| 2     | V\$TATA_01 | 5       | 2668 | (+) | STATAAAWRNNNNNN | CTATATCTACCCATA  |
| M0021 |            | 0.81225 |      |     |                 |                  |
| 6     | V\$TATA_C  | 2       | 2677 | (+) | NCTATAAAAR      | CCCATAAATC       |
| M0025 |            | 0.83532 |      |     |                 |                  |
| 2     | V\$TATA_01 | 1       | 2678 | (+) | STATAAAWRNNNNNN | CCATAAACTAGTGG   |
| M0021 |            | 0.78716 |      |     |                 |                  |
| 6     | V\$TATA_C  | 7       | 2699 | (+) | NCTATAAAAR      | TCCTTAAAGC       |
| M0021 |            | 0.83205 |      |     |                 |                  |
| 6     | V\$TATA_C  | 7       | 2887 | (+) | NCTATAAAAR      | TGTATTAAAA       |
| M0021 |            | 0.77132 |      |     |                 |                  |
| 6     | V\$TATA_C  | 3       | 2888 | (+) | NCTATAAAAR      | GTATTAAAAAC      |
| M0025 |            | 0.81933 |      |     |                 |                  |
| 2     | V\$TATA_01 | 5       | 2888 | (+) | STATAAAWRNNNNNN | GTATTAAACTTTAA   |
| M0021 |            | 0.83390 |      |     |                 |                  |
| 6     | V\$TATA_C  | 5       | 2896 | (+) | NCTATAAAAR      | ACTTTAAGAA       |
| M0025 |            | 0.82948 |      |     |                 |                  |
| 2     | V\$TATA_01 | 5       | 2910 | (+) | STATAAAWRNNNNNN | TTATTTAAAGGCTCT  |
| M0025 |            | 0.77670 |      |     |                 |                  |
| 2     | V\$TATA_01 | 6       | 2912 | (+) | STATAAAWRNNNNNN | ATTTAAAGGCTCTAA  |
| M0025 |            | 0.79345 |      |     |                 |                  |
| 2     | V\$TATA_01 | 3       | 2947 | (+) | STATAAAWRNNNNNN | TTATATTTATAGAGC  |
| M0025 |            | 0.82872 |      |     |                 |                  |
| 2     | V\$TATA_01 | 4       | 2949 | (+) | STATAAAWRNNNNNN | ATATTTATAGAGCAA  |
| M0025 |            | 0.81806 |      |     |                 |                  |
| 2     | V\$TATA_01 | 6       | 2951 | (+) | STATAAAWRNNNNNN | ATTTATAGAGCAAAA  |
| M0025 |            | 0.77188 |      |     |                 |                  |
| 2     | V\$TATA_01 | 5       | 2980 | (+) | STATAAAWRNNNNNN | CTATATTTTCATAAA  |
| M0021 |            | 0.89965 |      |     |                 |                  |
| 6     | V\$TATA_C  | 7       | 2987 | (+) | NCTATAAAAR      | TTCATAAAAAG      |
| M0025 |            | 0.81578 |      |     |                 |                  |
| 2     | V\$TATA_01 | 3       | 2988 | (+) | STATAAAWRNNNNNN | TCATAAAAAGTAACTC |
| M0021 |            | 0.74465 |      |     |                 |                  |
| 6     | V\$TATA_C  | 3       | 3018 | (+) | NCTATAAAAR      | TCTATTACAA       |
| M0021 |            |         |      |     |                 |                  |
| 6     | V\$TATA_C  | 0.76921 | 3021 | (+) | NCTATAAAAR      | ATTACAAAAAT      |
| M0021 |            |         |      |     |                 |                  |
| 6     | V\$TATA_C  | 0.85239 | 3028 | (+) | NCTATAAAAR      | AATTTAAAAAG      |
| M0025 |            | 0.80411 |      |     |                 |                  |
| 2     | V\$TATA_01 | 1       | 3029 | (+) | STATAAAWRNNNNNN | ATTTAAAAAGATGTTC |
| M0021 |            | 0.75204 |      |     |                 |                  |
| 6     | V\$TATA_C  | 6       | 3076 | (+) | NCTATAAAAR      | ACTTTATCAT       |
| M0025 |            | 0.77619 |      |     |                 |                  |
| 2     | V\$TATA_01 | 9       | 3084 | (+) | STATAAAWRNNNNNN | ATGTATAAGAAAAATC |
| M0021 |            | 0.83205 |      |     |                 |                  |
| 6     | V\$TATA_C  | 7       | 3085 | (+) | NCTATAAAAR      | TGTATAAGAA       |
| M0025 |            | 0.82999 |      |     |                 |                  |
| 2     | V\$TATA_01 | 2       | 3086 | (+) | STATAAAWRNNNNNN | GTATAAGAAAATCTT  |
| M0021 |            | 0.94560 |      |     |                 |                  |
| 6     | V\$TATA_C  | 3       | 3097 | (+) | NCTATAAAAR      | TCTTTAAAAAT      |
| M0025 |            | 0.80487 |      |     |                 |                  |
| 2     | V\$TATA_01 | 2       | 3098 | (+) | STATAAAWRNNNNNN | CTTTAAAAATTCTCAT |
| M0021 |            |         |      |     |                 |                  |
| 6     | V\$TATA_C  | 0.76921 | 3165 | (+) | NCTATAAAAR      | ATTATAATAT       |

|       |            |         |      |     |                 |                 |
|-------|------------|---------|------|-----|-----------------|-----------------|
| M0021 |            | 0.86295 |      |     |                 |                 |
| 6     | V\$TATA_C  | 2       | 3175 | (+) | NCTATAAAAR      | GCTCTAAAAA      |
| M0021 |            | 0.74016 |      |     |                 |                 |
| 6     | V\$TATA_C  | 4       | 3176 | (+) | NCTATAAAAR      | CTCTAAAAAA      |
| M0021 |            | 0.84922 |      |     |                 |                 |
| 6     | V\$TATA_C  | 1       | 3177 | (+) | NCTATAAAAR      | TCTAAAAAAT      |
| M0021 |            | 0.76630 |      |     |                 |                 |
| 6     | V\$TATA_C  | 6       | 3189 | (+) | NCTATAAAAR      | TTCACAAAAA      |
| M0025 |            | 0.82567 |      |     |                 |                 |
| 2     | V\$TATA_01 | 9       | 3197 | (+) | STATAAAWRNNNNNN | AAATAAATGCAAAAA |
| M0021 |            | 0.78901 |      |     |                 |                 |
| 6     | V\$TATA_C  | 5       | 3232 | (+) | NCTATAAAAR      | TGTTTTAAAT      |
| M0021 |            | 0.87404 |      |     |                 |                 |
| 6     | V\$TATA_C  | 3       | 3286 | (+) | NCTATAAAAR      | TTCTTAAAG       |
| M0021 |            | 0.81066 |      |     |                 |                 |
| 6     | V\$TATA_C  | 8       | 3324 | (+) | NCTATAAAAR      | AGTTTCAAAG      |
| M0021 |            | 0.76815 |      |     |                 |                 |
| 6     | V\$TATA_C  | 4       | 3458 | (+) | NCTATAAAAR      | TTTTTTAAAA      |
| M0021 |            | 0.90150 |      |     |                 |                 |
| 6     | V\$TATA_C  | 5       | 3459 | (+) | NCTATAAAAR      | TTTTTAAAG       |
| M0025 |            | 0.77797 |      |     |                 |                 |
| 2     | V\$TATA_01 | 5       | 3460 | (+) | STATAAAWRNNNNNN | TTTTAAAAGTTACAT |
| M0021 |            | 0.84341 |      |     |                 |                 |
| 6     | V\$TATA_C  | 2       | 3479 | (+) | NCTATAAAAR      | TGTATTAAAG      |
| M0025 |            | 0.84014 |      |     |                 |                 |
| 2     | V\$TATA_01 | 2       | 3480 | (+) | STATAAAWRNNNNNN | GTATTAAAGCTATCT |
| M0021 |            | 0.76419 |      |     |                 |                 |
| 6     | V\$TATA_C  | 3       | 3492 | (+) | NCTATAAAAR      | TCTGAAAAAG      |
| M0021 |            | 0.85027 |      |     |                 |                 |
| 6     | V\$TATA_C  | 7       | 3669 | (+) | NCTATAAAAR      | ACTGTAAAAAT     |
| M0021 |            |         |      |     |                 |                 |
| 6     | V\$TATA_C  | 0.76921 | 3715 | (+) | NCTATAAAAR      | ATTATTAAAT      |
| M0021 |            | 0.78426 |      |     |                 |                 |
| 6     | V\$TATA_C  | 2       | 3751 | (+) | NCTATAAAAR      | CCTAAATAAT      |
| M0021 |            | 0.83390 |      |     |                 |                 |
| 6     | V\$TATA_C  | 5       | 3787 | (+) | NCTATAAAAR      | ACTTTTAAAA      |
| M0021 |            | 0.88962 |      |     |                 |                 |
| 6     | V\$TATA_C  | 2       | 3788 | (+) | NCTATAAAAR      | CTTTTAAAAA      |
| M0021 |            | 0.76815 |      |     |                 |                 |
| 6     | V\$TATA_C  | 4       | 3789 | (+) | NCTATAAAAR      | TTTTAAAAAA      |
| M0025 |            | 0.77645 |      |     |                 |                 |
| 2     | V\$TATA_01 | 3       | 3789 | (+) | STATAAAWRNNNNNN | TTTTAAAAAATTTTG |
| M0021 |            |         |      |     |                 |                 |
| 6     | V\$TATA_C  | 0.77634 | 3790 | (+) | NCTATAAAAR      | TTTAAAAAAT      |
| M0021 |            | 0.82360 |      |     |                 |                 |
| 6     | V\$TATA_C  | 7       | 3842 | (+) | NCTATAAAAR      | TCTTTGAAAT      |
| M0021 |            | 0.77237 |      |     |                 |                 |
| 6     | V\$TATA_C  | 9       | 3876 | (+) | NCTATAAAAR      | ATTTTGAAAG      |
| M0025 |            |         |      |     |                 |                 |
| 2     | V\$TATA_01 | 0.78102 | 4044 | (+) | STATAAAWRNNNNNN | AAATAAATCAAAGGA |
| M0021 |            | 0.75574 |      |     |                 |                 |
| 6     | V\$TATA_C  | 3       | 4059 | (+) | NCTATAAAAR      | AGAATCAAAG      |
| M0025 |            | 0.78025 |      |     |                 |                 |
| 2     | V\$TATA_01 | 9       | 4112 | (+) | STATAAAWRNNNNNN | ATACAAATTGAAAAA |
| M0021 |            | 0.74412 |      |     |                 |                 |
| 6     | V\$TATA_C  | 5       | 4191 | (+) | NCTATAAAAR      | CCTATAATGA      |
| M0025 |            | 0.79649 |      |     |                 |                 |
| 2     | V\$TATA_01 | 8       | 4192 | (+) | STATAAAWRNNNNNN | CTATAATGAAAAAGA |
| M0021 |            | 0.74465 |      |     |                 |                 |
| 6     | V\$TATA_C  | 3       | 4206 | (+) | NCTATAAAAR      | AATATGAAAA      |
| M0025 |            | 0.83303 |      |     |                 |                 |
| 2     | V\$TATA_01 | 7       | 4207 | (+) | STATAAAWRNNNNNN | ATATGAAAACGAATA |
| M0021 |            | 0.76762 |      |     |                 |                 |
| 6     | V\$TATA_C  | 6       | 4224 | (+) | NCTATAAAAR      | TGTATATATA      |
| M0025 |            | 0.93529 |      |     |                 |                 |
| 2     | V\$TATA_01 | 6       | 4225 | (+) | STATAAAWRNNNNNN | GTATATATATGCATG |

|       |            |         |      |     |                 |                  |
|-------|------------|---------|------|-----|-----------------|------------------|
| M0025 |            | 0.87465 |      |     |                 |                  |
| 2     | V\$TATA_01 | 1       | 4227 | (+) | STATAAAWRNNNNNN | ATATATATGCATGAC  |
| M0025 |            | 0.77721 |      |     |                 |                  |
| 2     | V\$TATA_01 | 4       | 4298 | (+) | STATAAAWRNNNNNN | CAATTTAAAAAAAAGA |
| M0021 |            | 0.84103 |      |     |                 |                  |
| 6     | V\$TATA_C  | 5       | 4299 | (+) | NCTATAAAAR      | AATTTAAAAA       |
| M0021 |            | 0.76102 |      |     |                 |                  |
| 6     | V\$TATA_C  | 5       | 4300 | (+) | NCTATAAAAR      | ATTTAAAAAA       |
| M0025 |            | 0.84394 |      |     |                 |                  |
| 2     | V\$TATA_01 | 8       | 4300 | (+) | STATAAAWRNNNNNN | ATTTAAAAAAAAGAAA |
| M0021 |            | 0.79376 |      |     |                 |                  |
| 6     | V\$TATA_C  | 8       | 4301 | (+) | NCTATAAAAR      | TTTAAAAAAA       |
| M0025 |            | 0.77975 |      |     |                 |                  |
| 2     | V\$TATA_01 | 1       | 4302 | (+) | STATAAAWRNNNNNN | TTAAAAAAAAGAAAAA |
| M0021 |            | 0.75574 |      |     |                 |                  |
| 6     | V\$TATA_C  | 3       | 4310 | (+) | NCTATAAAAR      | AGAAAAAAAG       |
| M0021 |            |         |      |     |                 |                  |
| 6     | V\$TATA_C  | 0.76921 | 4326 | (+) | NCTATAAAAR      | ATTATTAAAT       |
| M0021 |            | 0.74069 |      |     |                 |                  |
| 6     | V\$TATA_C  | 2       | 4335 | (+) | NCTATAAAAR      | TTCTTCAAAA       |
| M0021 |            | 0.84103 |      |     |                 |                  |
| 6     | V\$TATA_C  | 5       | 4336 | (+) | NCTATAAAAR      | TCTTCAAAAA       |
| M0021 |            | 0.76630 |      |     |                 |                  |
| 6     | V\$TATA_C  | 6       | 4338 | (+) | NCTATAAAAR      | TTCAAAAAAA       |
| M0021 |            |         |      |     |                 |                  |
| 6     | V\$TATA_C  | 0.78611 | 4339 | (+) | NCTATAAAAR      | TCAAAAAAAA       |
| M0021 |            |         |      |     |                 |                  |
| 6     | V\$TATA_C  | 0.78611 | 4399 | (+) | NCTATAAAAR      | AAAATAAAAA       |
| M0025 |            | 0.79979 |      |     |                 |                  |
| 2     | V\$TATA_01 | 7       | 4400 | (+) | STATAAAWRNNNNNN | AAATAAAAAATAGTTA |
| M0025 |            | 0.77239 |      |     |                 |                  |
| 2     | V\$TATA_01 | 3       | 4402 | (+) | STATAAAWRNNNNNN | ATAAAAAATAGTTAAG |
| M0025 |            | 0.80182 |      |     |                 |                  |
| 2     | V\$TATA_01 | 7       | 4420 | (+) | STATAAAWRNNNNNN | ATATTTATTACTAGC  |
| M0025 |            | 0.85435 |      |     |                 |                  |
| 2     | V\$TATA_01 | 2       | 4475 | (+) | STATAAAWRNNNNNN | CTATAAGTTGGCACA  |
| M0021 |            | 0.79931 |      |     |                 |                  |
| 6     | V\$TATA_C  | 3       | 4505 | (+) | NCTATAAAAR      | AGTTTAATAA       |
| M0021 |            | 0.74465 |      |     |                 |                  |
| 6     | V\$TATA_C  | 3       | 4517 | (+) | NCTATAAAAR      | TCTACAAAGA       |
| M0021 |            | 0.76762 |      |     |                 |                  |
| 6     | V\$TATA_C  | 6       | 4550 | (+) | NCTATAAAAR      | CTTTTGAAAA       |
| M0021 |            | 0.76815 |      |     |                 |                  |
| 6     | V\$TATA_C  | 4       | 4551 | (+) | NCTATAAAAR      | TTTTGAAAAA       |
| M0021 |            |         |      |     |                 |                  |
| 6     | V\$TATA_C  | 0.78611 | 4574 | (+) | NCTATAAAAR      | TCAATGAAAA       |
| M0021 |            | 0.79508 |      |     |                 |                  |
| 6     | V\$TATA_C  | 8       | 4583 | (+) | NCTATAAAAR      | ACTATTTAAA       |
| M0025 |            | 0.85612 |      |     |                 |                  |
| 2     | V\$TATA_01 | 8       | 4584 | (+) | STATAAAWRNNNNNN | CTATTTAAAAGGCCA  |
| M0021 |            | 0.85951 |      |     |                 |                  |
| 6     | V\$TATA_C  | 9       | 4585 | (+) | NCTATAAAAR      | TATTTAAAAG       |
| M0025 |            | 0.89241 |      |     |                 |                  |
| 2     | V\$TATA_01 | 3       | 4586 | (+) | STATAAAWRNNNNNN | ATTTAAAAGGCCACT  |
| M0021 |            | 0.80221 |      |     |                 |                  |
| 6     | V\$TATA_C  | 8       | 4624 | (+) | NCTATAAAAR      | TCTATATACA       |
| M0025 |            | 0.77848 |      |     |                 |                  |
| 2     | V\$TATA_01 | 3       | 4625 | (+) | STATAAAWRNNNNNN | CTATATACAATAAAA  |
| M0021 |            | 0.88354 |      |     |                 |                  |
| 6     | V\$TATA_C  | 9       | 4631 | (+) | NCTATAAAAR      | ACAATAAAAT       |
| M0021 |            | 0.76815 |      |     |                 |                  |
| 6     | V\$TATA_C  | 4       | 4644 | (+) | NCTATAAAAR      | TTTTTGAAAA       |
| M0021 |            | 0.76815 |      |     |                 |                  |
| 6     | V\$TATA_C  | 4       | 4645 | (+) | NCTATAAAAR      | TTTTGAAAAA       |
| M0021 |            | 0.75072 |      |     |                 |                  |
| 6     | V\$TATA_C  | 6       | 4712 | (+) | NCTATAAAAR      | TTTTTAAACT       |

|       |            |         |      |     |                 |                 |
|-------|------------|---------|------|-----|-----------------|-----------------|
| M0021 |            | 0.87087 |      |     |                 |                 |
| 6     | V\$TATA_C  | 4       | 4719 | (+) | NCTATAAAAR      | ACTATAAATG      |
| M0025 |            | 0.91702 |      |     |                 |                 |
| 2     | V\$TATA_01 | 6       | 4720 | (+) | STATAAAWRNNNNNN | CTATAAATGTGTAAG |
| M0021 |            | 0.82492 |      |     |                 |                 |
| 6     | V\$TATA_C  | 7       | 4733 | (+) | NCTATAAAAR      | AGTATGAAAA      |
| M0025 |            | 0.81045 |      |     |                 |                 |
| 2     | V\$TATA_01 | 4       | 4734 | (+) | STATAAAWRNNNNNN | GTATGAAAACTATGA |
| M0021 |            | 0.74069 |      |     |                 |                 |
| 6     | V\$TATA_C  | 2       | 4780 | (+) | NCTATAAAAR      | TTCTTGAAAA      |
| M0021 |            | 0.84103 |      |     |                 |                 |
| 6     | V\$TATA_C  | 5       | 4781 | (+) | NCTATAAAAR      | TCTTGAAAAA      |
| M0021 |            | 0.75151 |      |     |                 |                 |
| 6     | V\$TATA_C  | 8       | 4784 | (+) | NCTATAAAAR      | TGAAAAAATA      |
| M0021 |            |         |      |     |                 |                 |
| 6     | V\$TATA_C  | 0.79324 | 4838 | (+) | NCTATAAAAR      | TACATATAAG      |
| M0025 |            | 0.80690 |      |     |                 |                 |
| 2     | V\$TATA_01 | 2       | 4839 | (+) | STATAAAWRNNNNNN | ACATATAAGTTAATA |
| M0025 |            | 0.77442 |      |     |                 |                 |
| 2     | V\$TATA_01 | 3       | 4841 | (+) | STATAAAWRNNNNNN | ATATAAGTTAATATT |
| M0025 |            | 0.78076 |      |     |                 |                 |
| 2     | V\$TATA_01 | 6       | 4854 | (+) | STATAAAWRNNNNNN | TTATATTAAGATGTC |
| M0025 |            | 0.78431 |      |     |                 |                 |
| 2     | V\$TATA_01 | 9       | 4856 | (+) | STATAAAWRNNNNNN | ATATTAAGATGTCTA |
| M0021 |            | 0.76947 |      |     |                 |                 |
| 6     | V\$TATA_C  | 5       | 4920 | (+) | NCTATAAAAR      | ACTTTTTAAA      |
| M0021 |            | 0.75019 |      |     |                 |                 |
| 6     | V\$TATA_C  | 8       | 4921 | (+) | NCTATAAAAR      | CTTTTTAAAT      |
| M0021 |            | 0.75072 |      |     |                 |                 |
| 6     | V\$TATA_C  | 6       | 4922 | (+) | NCTATAAAAR      | TTTTTAAATT      |
| M0021 |            | 0.76102 |      |     |                 |                 |
| 6     | V\$TATA_C  | 5       | 4929 | (+) | NCTATAAAAR      | ATTTTAAACA      |
| M0025 |            |         |      |     |                 |                 |
| 2     | V\$TATA_01 | 0.78102 | 4946 | (+) | STATAAAWRNNNNNN | TAATAAATTTAGAGA |
| M0021 |            | 0.75072 |      |     |                 |                 |
| 6     | V\$TATA_C  | 6       | 5002 | (+) | NCTATAAAAR      | TTTTTCAAAT      |
| M0021 |            | 0.75336 |      |     |                 |                 |
| 6     | V\$TATA_C  | 7       | 5025 | (+) | NCTATAAAAR      | ACATTCAAAA      |
| M0025 |            |         |      |     |                 |                 |
| 2     | V\$TATA_01 | 0.7932  | 5048 | (+) | STATAAAWRNNNNNN | TTTTATATCCAAGGA |
| M0025 |            | 0.77036 |      |     |                 |                 |
| 2     | V\$TATA_01 | 3       | 5061 | (+) | STATAAAWRNNNNNN | GAATATGTGTGCAAT |
| M0021 |            | 0.86559 |      |     |                 |                 |
| 6     | V\$TATA_C  | 3       | 5095 | (+) | NCTATAAAAR      | ATTTTAAAT       |
| M0025 |            | 0.80740 |      |     |                 |                 |
| 2     | V\$TATA_01 | 9       | 5103 | (+) | STATAAAWRNNNNNN | ATATTTAAAATTATG |
| M0021 |            | 0.83073 |      |     |                 |                 |
| 6     | V\$TATA_C  | 7       | 5104 | (+) | NCTATAAAAR      | TATTTAAAT       |
| M0025 |            | 0.78051 |      |     |                 |                 |
| 2     | V\$TATA_01 | 3       | 5105 | (+) | STATAAAWRNNNNNN | ATTTAAAATTATGAC |
| M0021 |            | 0.85687 |      |     |                 |                 |
| 6     | V\$TATA_C  | 9       | 5131 | (+) | NCTATAAAAR      | AGTTTATAAA      |
| M0025 |            | 0.82593 |      |     |                 |                 |
| 2     | V\$TATA_01 | 3       | 5132 | (+) | STATAAAWRNNNNNN | GTTTATAAACTTTT  |
| M0021 |            | 0.88935 |      |     |                 |                 |
| 6     | V\$TATA_C  | 8       | 5133 | (+) | NCTATAAAAR      | TTTATAAAAC      |
| M0025 |            | 0.81882 |      |     |                 |                 |
| 2     | V\$TATA_01 | 8       | 5134 | (+) | STATAAAWRNNNNNN | TTATAAACTTTTGG  |
| M0021 |            | 0.81066 |      |     |                 |                 |
| 6     | V\$TATA_C  | 8       | 5150 | (+) | NCTATAAAAR      | AGTTTTAAAG      |
| M0025 |            | 0.82339 |      |     |                 |                 |
| 2     | V\$TATA_01 | 5       | 5160 | (+) | STATAAAWRNNNNNN | TTTTATATATACATG |
| M0025 |            | 0.86932 |      |     |                 |                 |
| 2     | V\$TATA_01 | 3       | 5162 | (+) | STATAAAWRNNNNNN | TTATATATACATGCC |
| M0025 |            |         |      |     |                 |                 |
| 2     | V\$TATA_01 | 0.7932  | 5164 | (+) | STATAAAWRNNNNNN | ATATATACATGCCTA |

|       |            |         |      |     |                  |                  |
|-------|------------|---------|------|-----|------------------|------------------|
| M0025 |            | 0.81146 |      |     |                  |                  |
| 2     | V\$TATA_01 | 9       | 5166 | (+) | STATAAAWRNNNNNNN | ATATACATGCCTATG  |
| M0021 |            | 0.74597 |      |     |                  |                  |
| 6     | V\$TATA_C  | 3       | 5175 | (+) | NCTATAAAAR       | CCTATGGAAA       |
| M0021 |            | 0.98151 |      |     |                  |                  |
| 6     | V\$TATA_C  | 6       | 5240 | (+) | NCTATAAAAR       | ACTATAAAAA       |
| M0025 |            | 0.95178 |      |     |                  |                  |
| 2     | V\$TATA_01 | 9       | 5241 | (+) | STATAAAWRNNNNNNN | CTATAAAAAACAAATG |
| M0021 |            | 0.76102 |      |     |                  |                  |
| 6     | V\$TATA_C  | 5       | 5263 | (+) | NCTATAAAAR       | ATTTTTAAAA       |
| M0021 |            | 0.89015 |      |     |                  |                  |
| 6     | V\$TATA_C  | 1       | 5264 | (+) | NCTATAAAAR       | TTTTTAAAAA       |
| M0025 |            |         |      |     |                  |                  |
| 2     | V\$TATA_01 | 0.78305 | 5264 | (+) | STATAAAWRNNNNNNN | TTTTTAAAAAGCATA  |
| M0021 |            | 0.77950 |      |     |                  |                  |
| 6     | V\$TATA_C  | 9       | 5265 | (+) | NCTATAAAAR       | TTTTAAAAAG       |
| M0025 |            | 0.82364 |      |     |                  |                  |
| 2     | V\$TATA_01 | 9       | 5265 | (+) | STATAAAWRNNNNNNN | TTTTAAAAAGCATAA  |
| M0021 |            | 0.88222 |      |     |                  |                  |
| 6     | V\$TATA_C  | 9       | 5279 | (+) | NCTATAAAAR       | ATTATAAAAC       |
| M0025 |            | 0.78533 |      |     |                  |                  |
| 2     | V\$TATA_01 | 4       | 5280 | (+) | STATAAAWRNNNNNNN | TTATAAAACATTTAT  |
| M0025 |            | 0.85511 |      |     |                  |                  |
| 2     | V\$TATA_01 | 3       | 5289 | (+) | STATAAAWRNNNNNNN | ATTTATATATCGATG  |
| M0025 |            | 0.83024 |      |     |                  |                  |
| 2     | V\$TATA_01 | 6       | 5291 | (+) | STATAAAWRNNNNNNN | TTATATATCGATGTT  |
| M0021 |            | 0.83971 |      |     |                  |                  |
| 6     | V\$TATA_C  | 5       | 5328 | (+) | NCTATAAAAR       | CCTAGAAAAAC      |
| M0021 |            | 0.83390 |      |     |                  |                  |
| 6     | V\$TATA_C  | 5       | 5336 | (+) | NCTATAAAAR       | ACTTCAAAAA       |
| M0021 |            | 0.74491 |      |     |                  |                  |
| 6     | V\$TATA_C  | 7       | 5348 | (+) | NCTATAAAAR       | ATCTTAATAG       |
| M0021 |            | 0.76815 |      |     |                  |                  |
| 6     | V\$TATA_C  | 4       | 5391 | (+) | NCTATAAAAR       | TTTTTAACAA       |
| M0021 |            | 0.78795 |      |     |                  |                  |
| 6     | V\$TATA_C  | 9       | 5408 | (+) | NCTATAAAAR       | TCAATACAAA       |
| M0021 |            | 0.82043 |      |     |                  |                  |
| 6     | V\$TATA_C  | 8       | 5419 | (+) | NCTATAAAAR       | TGAATATAAG       |
| M0025 |            | 0.78431 |      |     |                  |                  |
| 2     | V\$TATA_01 | 9       | 5420 | (+) | STATAAAWRNNNNNNN | GAATATAAGTTATTC  |
| M0025 |            | 0.77594 |      |     |                  |                  |
| 2     | V\$TATA_01 | 5       | 5442 | (+) | STATAAAWRNNNNNNN | TCATTTAAGCAAATA  |
| M0025 |            | 0.78888 |      |     |                  |                  |
| 2     | V\$TATA_01 | 6       | 5463 | (+) | STATAAAWRNNNNNNN | GTATTTGTTGGCACA  |
| M0021 |            | 0.76102 |      |     |                  |                  |
| 6     | V\$TATA_C  | 5       | 5531 | (+) | NCTATAAAAR       | ATTTTTAAAA       |
| M0021 |            | 0.90150 |      |     |                  |                  |
| 6     | V\$TATA_C  | 5       | 5532 | (+) | NCTATAAAAR       | TTTTTAAAAAG      |
| M0025 |            | 0.79599 |      |     |                  |                  |
| 2     | V\$TATA_01 | 1       | 5532 | (+) | STATAAAWRNNNNNNN | TTTTTAAAAGACAAC  |
| M0025 |            | 0.84090 |      |     |                  |                  |
| 2     | V\$TATA_01 | 3       | 5533 | (+) | STATAAAWRNNNNNNN | TTTTTAAAAGACAAC  |
| M0021 |            |         |      |     |                  |                  |
| 6     | V\$TATA_C  | 0.86929 | 5642 | (+) | NCTATAAAAR       | GCTTTATAAT       |
| M0021 |            |         |      |     |                  |                  |
| 6     | V\$TATA_C  | 0.77634 | 5644 | (+) | NCTATAAAAR       | TTTATAATAT       |
| M0021 |            | 0.74544 |      |     |                  |                  |
| 6     | V\$TATA_C  | 5       | 5652 | (+) | NCTATAAAAR       | ATTTTACAAT       |
| M0021 |            |         |      |     |                  |                  |
| 6     | V\$TATA_C  | 0.78611 | 5665 | (+) | NCTATAAAAR       | AAAATAAAAA       |
| M0025 |            |         |      |     |                  |                  |
| 2     | V\$TATA_01 | 0.85359 | 5666 | (+) | STATAAAWRNNNNNNN | AAATAAAAAACAAAGA |
| M0021 |            | 0.82360 |      |     |                  |                  |
| 6     | V\$TATA_C  | 7       | 5693 | (+) | NCTATAAAAR       | TCTTTAATAT       |
| M0021 |            | 0.77079 |      |     |                  |                  |
| 6     | V\$TATA_C  | 5       | 5696 | (+) | NCTATAAAAR       | TTAATATAAA       |

|       |            |         |      |     |                 |                 |
|-------|------------|---------|------|-----|-----------------|-----------------|
| M0025 |            | 0.77721 |      |     |                 |                 |
| 2     | V\$TATA_01 | 4       | 5697 | (+) | STATAAAWRNNNNNN | TAATATAAAAGGTAT |
| M0021 |            | 0.87800 |      |     |                 |                 |
| 6     | V\$TATA_C  | 4       | 5698 | (+) | NCTATAAAAR      | AATATAAAAG      |
| M0025 |            | 0.87490 |      |     |                 |                 |
| 2     | V\$TATA_01 | 5       | 5699 | (+) | STATAAAWRNNNNNN | ATATAAAAGGTATCT |
| M0021 |            | 0.93662 |      |     |                 |                 |
| 6     | V\$TATA_C  | 5       | 5711 | (+) | NCTATAAAAR      | TCTTTAAAC       |
| M0025 |            |         |      |     |                 |                 |
| 2     | V\$TATA_01 | 0.85562 | 5712 | (+) | STATAAAWRNNNNNN | CTTTAAACCACAAA  |
| M0021 |            | 0.83205 |      |     |                 |                 |
| 6     | V\$TATA_C  | 7       | 5719 | (+) | NCTATAAAAR      | ACCACAAAAA      |
| M0021 |            | 0.77898 |      |     |                 |                 |
| 6     | V\$TATA_C  | 1       | 5722 | (+) | NCTATAAAAR      | ACAAAAAAA       |
| M0021 |            | 0.78505 |      |     |                 |                 |
| 6     | V\$TATA_C  | 4       | 5896 | (+) | NCTATAAAAR      | ATATTAAAT       |
| M0025 |            | 0.84217 |      |     |                 |                 |
| 2     | V\$TATA_01 | 2       | 5896 | (+) | STATAAAWRNNNNNN | ATATTAAATGCCTT  |
| M0021 |            | 0.84024 |      |     |                 |                 |
| 6     | V\$TATA_C  | 3       | 5912 | (+) | NCTATAAAAR      | TGTCTAAAA       |
| M0025 |            | 0.80284 |      |     |                 |                 |
| 2     | V\$TATA_01 | 2       | 5913 | (+) | STATAAAWRNNNNNN | GTCTAAAACTAAGT  |
| M0021 |            | 0.76049 |      |     |                 |                 |
| 6     | V\$TATA_C  | 6       | 5925 | (+) | NCTATAAAAR      | AGTATTTAA       |
| M0025 |            | 0.87541 |      |     |                 |                 |
| 2     | V\$TATA_01 | 2       | 5926 | (+) | STATAAAWRNNNNNN | GTATTTAAACCCCAT |
| M0021 |            | 0.94322 |      |     |                 |                 |
| 6     | V\$TATA_C  | 7       | 5936 | (+) | NCTATAAAAR      | CCCATAAAA       |
| M0025 |            | 0.80233 |      |     |                 |                 |
| 2     | V\$TATA_01 | 4       | 5937 | (+) | STATAAAWRNNNNNN | CCATAAAATAATCTA |
| M0021 |            | 0.85159 |      |     |                 |                 |
| 6     | V\$TATA_C  | 8       | 5958 | (+) | NCTATAAAAR      | TGTGTAAAA       |
| M0025 |            | 0.80030 |      |     |                 |                 |
| 2     | V\$TATA_01 | 4       | 5959 | (+) | STATAAAWRNNNNNN | GTGTAAAAGTCATCA |
| M0021 |            | 0.80142 |      |     |                 |                 |
| 6     | V\$TATA_C  | 6       | 6009 | (+) | NCTATAAAAR      | CTTCTAAAA       |
| M0025 |            | 0.78355 |      |     |                 |                 |
| 2     | V\$TATA_01 | 7       | 6066 | (+) | STATAAAWRNNNNNN | GTATTTAGCAATAAG |
| M0021 |            | 0.78558 |      |     |                 |                 |
| 6     | V\$TATA_C  | 2       | 6073 | (+) | NCTATAAAAR      | GCAATAAGAG      |
| M0025 |            | 0.77594 |      |     |                 |                 |
| 2     | V\$TATA_01 | 5       | 6074 | (+) | STATAAAWRNNNNNN | CAATAAGAGAAA    |
| M0021 |            | 0.74570 |      |     |                 |                 |
| 6     | V\$TATA_C  | 9       | 6104 | (+) | NCTATAAAAR      | ACTGGAAAA       |
| M0021 |            | 0.77290 |      |     |                 |                 |
| 6     | V\$TATA_C  | 7       | 6131 | (+) | NCTATAAAAR      | AGTTTAATAC      |
| M0021 |            | 0.78082 |      |     |                 |                 |
| 6     | V\$TATA_C  | 9       | 6152 | (+) | NCTATAAAAR      | ACTTTTAA        |
| M0025 |            | 0.78888 |      |     |                 |                 |
| 2     | V\$TATA_01 | 6       | 6153 | (+) | STATAAAWRNNNNNN | CTTTTTAAGACTGG  |
| M0021 |            | 0.74174 |      |     |                 |                 |
| 6     | V\$TATA_C  | 8       | 6154 | (+) | NCTATAAAAR      | TTTTTAAGAC      |
| M0025 |            |         |      |     |                 |                 |
| 2     | V\$TATA_01 | 0.77696 | 6248 | (+) | STATAAAWRNNNNNN | ATACATAAATATGTC |
| M0025 |            |         |      |     |                 |                 |
| 2     | V\$TATA_01 | 0.82035 | 6250 | (+) | STATAAAWRNNNNNN | ACATAAATATGTCTT |
| M0021 |            | 0.79271 |      |     |                 |                 |
| 6     | V\$TATA_C  | 2       | 6274 | (+) | NCTATAAAAR      | GAAATAAAAG      |
| M0025 |            | 0.81476 |      |     |                 |                 |
| 2     | V\$TATA_01 | 8       | 6275 | (+) | STATAAAWRNNNNNN | AAATAAAAGTGTAAT |
| M0025 |            | 0.84927 |      |     |                 |                 |
| 2     | V\$TATA_01 | 7       | 6323 | (+) | STATAAAWRNNNNNN | CTATTTATATGGAAA |
| M0025 |            | 0.85206 |      |     |                 |                 |
| 2     | V\$TATA_01 | 8       | 6325 | (+) | STATAAAWRNNNNNN | ATTTATATGGAAAGA |
| M0025 |            | 0.78381 |      |     |                 |                 |
| 2     | V\$TATA_01 | 1       | 6327 | (+) | STATAAAWRNNNNNN | TTATATGGAAAGACC |

|       |            |         |      |     |                   |                   |
|-------|------------|---------|------|-----|-------------------|-------------------|
| M0021 |            | 0.80829 |      |     |                   |                   |
| 6     | V\$TATA_C  | 2       | 6352 | (+) | NCTATAAAAR        | TTTTTATAAT        |
| M0025 |            | 0.79979 |      |     |                   |                   |
| 2     | V\$TATA_01 | 7       | 6353 | (+) | STATAAAWRNNNNNN   | TTTTATAATTGCACA   |
| M0025 |            | 0.80969 |      |     |                   |                   |
| 2     | V\$TATA_01 | 3       | 6355 | (+) | STATAAAWRNNNNNN   | TTATAATTGCACATA   |
| M0021 |            | 0.77053 |      |     |                   |                   |
| 6     | V\$TATA_C  | 1       | 6371 | (+) | NCTATAAAAR        | TCAATAGAAT        |
| M0021 |            | 0.79271 |      |     |                   |                   |
| 6     | V\$TATA_C  | 2       | 6386 | (+) | NCTATAAAAR        | CAAATAAAAA        |
| M0025 |            | 0.82364 |      |     |                   |                   |
| 2     | V\$TATA_01 | 9       | 6387 | (+) | STATAAAWRNNNNNN   | AAATAAAAAATAGAAA  |
| M0025 |            | 0.78736 |      |     |                   |                   |
| 2     | V\$TATA_01 | 4       | 6389 | (+) | STATAAAWRNNNNNN   | ATAAAAAATAGAAAAT  |
| M0025 |            | 0.77112 |      |     |                   |                   |
| 2     | V\$TATA_01 | 4       | 6414 | (+) | STATAAAWRNNNNNN   | ATATTTAACAGATAA   |
| M0021 |            | 0.74227 |      |     |                   |                   |
| 6     | V\$TATA_C  | 6       | 6422 | (+) | NCTATAAAAR        | CAGATAAAAT        |
| M0025 |            | 0.78381 |      |     |                   |                   |
| 2     | V\$TATA_01 | 1       | 6423 | (+) | STATAAAWRNNNNNN   | AGATAAAATTAAGCT   |
| M0021 |            | 0.77185 |      |     |                   |                   |
| 6     | V\$TATA_C  | 1       | 6434 | (+) | NCTATAAAAR        | AGCTGAAAAA        |
| M0021 |            | 0.74095 |      |     |                   |                   |
| 6     | V\$TATA_C  | 6       | 6435 | (+) | NCTATAAAAR        | GCTGAAAAAA        |
| M0025 |            | 0.81984 |      |     |                   |                   |
| 2     | V\$TATA_01 | 3       | 6498 | (+) | STATAAAWRNNNNNN   | ATATAATTAGGTTGG   |
| M0021 |            | 0.75574 |      |     |                   |                   |
| 6     | V\$TATA_C  | 3       | 6543 | (+) | NCTATAAAAR        | GGTAAATAAA        |
| M0021 |            | 0.77581 |      |     |                   |                   |
| 6     | V\$TATA_C  | 2       | 6545 | (+) | NCTATAAAAR        | TAAATAAAAT        |
| M0025 |            | 0.77416 |      |     |                   |                   |
| 2     | V\$TATA_01 | 9       | 6584 | (+) | STATAAAWRNNNNNN   | ATACATATATATATA   |
| M0025 |            | 0.81705 |      |     |                   |                   |
| 2     | V\$TATA_01 | 2       | 6586 | (+) | STATAAAWRNNNNNN   | ACATATATATATACA   |
| M0025 |            | 0.88226 |      |     |                   |                   |
| 2     | V\$TATA_01 | 3       | 6588 | (+) | STATAAAWRNNNNNN   | ATATATATATACATA   |
| M0025 |            |         |      |     |                   |                   |
| 2     | V\$TATA_01 | 0.88607 | 6590 | (+) | STATAAAWRNNNNNN   | ATATATATACATATA   |
| M0025 |            | 0.77213 |      |     |                   |                   |
| 2     | V\$TATA_01 | 9       | 6592 | (+) | STATAAAWRNNNNNN   | ATATATACATATAAA   |
| M0025 |            | 0.79066 |      |     |                   |                   |
| 2     | V\$TATA_01 | 2       | 6596 | (+) | STATAAAWRNNNNNN   | ATACATATAAATATG   |
| M0021 |            | 0.78188 |      |     |                   |                   |
| 6     | V\$TATA_C  | 5       | 6597 | (+) | NCTATAAAAR        | TACATATAAA        |
| M0025 |            | 0.80258 |      |     |                   |                   |
| 2     | V\$TATA_01 | 8       | 6598 | (+) | STATAAAWRNNNNNN   | ACATATAAATATGAA   |
| M0021 |            | 0.75125 |      |     |                   |                   |
| 6     | V\$TATA_C  | 4       | 6599 | (+) | NCTATAAAAR        | CATATAAATA        |
| M0025 |            | 0.89089 |      |     |                   |                   |
| 2     | V\$TATA_01 | 1       | 6600 | (+) | STATAAAWRNNNNNN   | ATATAAATATGAAAA   |
| M0021 |            | 0.74465 |      |     |                   |                   |
| 6     | V\$TATA_C  | 3       | 6605 | (+) | NCTATAAAAR        | AATATGAAAA        |
| M0025 |            | 0.80614 |      |     |                   |                   |
| 2     | V\$TATA_01 | 1       | 6606 | (+) | STATAAAWRNNNNNN   | ATATGAAAAAATATG   |
| M0025 |            | 0.77569 |      |     |                   |                   |
| 2     | V\$TATA_01 | 1       | 6726 | (+) | STATAAAWRNNNNNN   | CTTTTTATATGTGCC   |
| M0025 |            |         |      |     |                   |                   |
| 2     | V\$TATA_01 | 0.79929 | 6728 | (+) | STATAAAWRNNNNNN   | TTTTATATGTGCCAA   |
| M0025 |            | 0.84394 |      |     |                   |                   |
| 2     | V\$TATA_01 | 8       | 6730 | (+) | STATAAAWRNNNNNN   | TTATATGTGCCAAGC   |
| M0005 |            | 0.84993 |      |     |                   |                   |
| 9     | V\$YY1_01  | 4       | 18   | (-) | NNNNNCCATNTWNNNWN | CTTTATAAATGACAAC  |
| M0005 |            | 0.81159 |      |     |                   |                   |
| 9     | V\$YY1_01  | 9       | 112  | (+) | NNNNNCCATNTWNNNWN | CATCTTCCTATTGGGTG |
| M0005 |            | 0.81913 |      |     |                   |                   |
| 9     | V\$YY1_01  | 5       | 167  | (+) | NNNNNCCATNTWNNNWN | TAACACCCCTTAATTAG |

|       |           |         |      |     |                      |                      |
|-------|-----------|---------|------|-----|----------------------|----------------------|
| M0005 |           | 0.84207 |      |     |                      |                      |
| 9     | V\$YY1_01 | 1       | 182  | (+) | NNNNNCCATNTWNNNWN    | AGTCTCCAGTTATTAC     |
| M0005 |           | 0.77555 |      |     |                      |                      |
| 9     | V\$YY1_01 | 7       | 284  | (+) | NNNNNCCATNTWNNNWN    | AATGTCCAGAGAGAATG    |
| M0005 |           | 0.77457 |      |     |                      |                      |
| 9     | V\$YY1_01 | 4       | 355  | (-) | NNNNNCCATNTWNNNWN    | GCTTGAATATGCCTTGG    |
| M0005 |           | 0.87090 |      |     |                      |                      |
| 9     | V\$YY1_01 | 4       | 369  | (+) | NNNNNCCATNTWNNNWN    | TGGCATCATTTTGACAT    |
| M0005 |           | 0.77031 |      |     |                      |                      |
| 9     | V\$YY1_01 | 5       | 540  | (+) | NNNNNCCATNTWNNNWN    | TACAGACATATGTGGAG    |
| M0005 |           |         |      |     |                      |                      |
| 9     | V\$YY1_01 | 0.77654 | 684  | (+) | NNNNNCCATNTWNNNWN    | GAGTTACATATCCTCAC    |
| M0005 |           | 0.82077 |      |     |                      |                      |
| 9     | V\$YY1_01 | 3       | 767  | (-) | NNNNNCCATNTWNNNWN    | AGTAAATTATGGTCTTA    |
| M0005 |           | 0.78342 |      |     |                      |                      |
| 9     | V\$YY1_01 | 1       | 820  | (+) | NNNNNCCATNTWNNNWN    | TACTGTCATTTTACAGA    |
| M0005 |           | 0.77981 |      |     |                      |                      |
| 9     | V\$YY1_01 | 7       | 855  | (-) | NNNNNCCATNTWNNNWN    | GTGTAAAATCTGTATATG   |
| M0005 |           | 0.77948 |      |     |                      |                      |
| 9     | V\$YY1_01 | 9       | 932  | (-) | NNNNNCCATNTWNNNWN    | AAAAAGAAATGATAATT    |
| M0005 |           | 0.77719 |      |     |                      |                      |
| 9     | V\$YY1_01 | 5       | 975  | (-) | NNNNNCCATNTWNNNWN    | TCACTACAATGGCAATC    |
| M0005 |           | 0.84927 |      |     |                      |                      |
| 9     | V\$YY1_01 | 9       | 1072 | (-) | NNNNNCCATNTWNNNWN    | GTAAAAAAATGAAAAAA    |
| M0005 |           |         |      |     |                      |                      |
| 9     | V\$YY1_01 | 0.82536 | 1117 | (+) | NNNNNCCATNTWNNNWN    | GAACTCCATTCTTTTCA    |
| M0005 |           | 0.78309 |      |     |                      |                      |
| 9     | V\$YY1_01 | 3       | 1204 | (+) | NNNNNCCATNTWNNNWN    | TGAAATCAGTTTAGTAG    |
| M0005 |           | 0.80897 |      |     |                      |                      |
| 9     | V\$YY1_01 | 8       | 1253 | (-) | NNNNNCCATNTWNNNWN    | AAAAGCAAATGGAGTCT    |
| M0005 |           | 0.77490 |      |     |                      |                      |
| 9     | V\$YY1_01 | 2       | 1260 | (-) | NNNNNCCATNTWNNNWN    | AATGGAGTCTGGTGTGT    |
| M0005 |           | 0.77588 |      |     |                      |                      |
| 9     | V\$YY1_01 | 5       | 1283 | (-) | NNNNNCCATNTWNNNWN    | TACCAAGCCTGGACTTT    |
| M0005 |           | 0.78112 |      |     |                      |                      |
| 9     | V\$YY1_01 | 7       | 1321 | (+) | NNNNNCCATNTWNNNWN    | AAAACTCAGTTTGCAAG    |
| M0005 |           | 0.78178 |      |     |                      |                      |
| 9     | V\$YY1_01 | 2       | 1460 | (+) | NNNNNCCATNTWNNNWN    | AAAGACTATTTTTAAAA    |
| M0005 |           | 0.83977 |      |     |                      |                      |
| 9     | V\$YY1_01 | 7       | 1602 | (+) | NNNNNCCATNTWNNNWN    | TTCATCATTCATGATG     |
| M0005 |           | 0.77752 |      |     |                      |                      |
| 9     | V\$YY1_01 | 3       | 1605 | (-) | NNNNNCCATNTWNNNWN    | CATCATTCATGATGACT    |
| M0006 |           |         |      |     |                      |                      |
| 9     | V\$YY1_02 | 0.78115 | 1606 | (-) | NNNCGGCCATCTTGNCTSNW | ATCATTCATGATGACTGGAG |
| M0006 |           | 0.77490 |      |     |                      |                      |
| 9     | V\$YY1_02 | 2       | 1664 | (+) | NNNCGGCCATCTTGNCTSNW | TCTCCTCCATCTTACATGTT |
| M0005 |           | 0.82077 |      |     |                      |                      |
| 9     | V\$YY1_01 | 3       | 1665 | (+) | NNNNNCCATNTWNNNWN    | CTCCTCCATCTTACATG    |
| M0005 |           | 0.78964 |      |     |                      |                      |
| 9     | V\$YY1_01 | 6       | 1671 | (-) | NNNNNCCATNTWNNNWN    | CATCTTACATGTTCTCTG   |
| M0005 |           | 0.84305 |      |     |                      |                      |
| 9     | V\$YY1_01 | 4       | 1691 | (-) | NNNNNCCATNTWNNNWN    | GACCAATCATGGAATTA    |
| M0005 |           | 0.79783 |      |     |                      |                      |
| 9     | V\$YY1_01 | 7       | 1732 | (+) | NNNNNCCATNTWNNNWN    | AACTTTCATTTATAGGT    |
| M0005 |           | 0.79652 |      |     |                      |                      |
| 9     | V\$YY1_01 | 7       | 1809 | (-) | NNNNNCCATNTWNNNWN    | AGCCTGAGATGGAAGTC    |
| M0005 |           | 0.80635 |      |     |                      |                      |
| 9     | V\$YY1_01 | 6       | 1979 | (+) | NNNNNCCATNTWNNNWN    | TTTCTCCATTTAAATGC    |
| M0005 |           | 0.77260 |      |     |                      |                      |
| 9     | V\$YY1_01 | 8       | 2096 | (-) | NNNNNCCATNTWNNNWN    | TTTCTTAACTGAAAACT    |
| M0006 |           | 0.75455 |      |     |                      |                      |
| 9     | V\$YY1_02 | 2       | 2254 | (+) | NNNCGGCCATCTTGNCTSNW | ACAGTGCCTTGTTCTTTATA |
| M0005 |           |         |      |     |                      |                      |
| 9     | V\$YY1_01 | 0.81848 | 2312 | (-) | NNNNNCCATNTWNNNWN    | ACCTATAAATGTACATA    |
| M0005 |           | 0.78604 |      |     |                      |                      |
| 9     | V\$YY1_01 | 2       | 2319 | (+) | NNNNNCCATNTWNNNWN    | AATGTACATATATATTT    |



|       |           |         |      |     |                     |                      |
|-------|-----------|---------|------|-----|---------------------|----------------------|
| M0006 |           | 0.75830 |      |     |                     |                      |
| 9     | V\$YY1_02 | 1       | 2337 | (+) | NNNCGGCCATCTGNCTSNW | TAGGCACCATTATGTGCCTA |
| M0005 |           | 0.80111 |      |     |                     |                      |
| 9     | V\$YY1_01 | 4       | 2338 | (+) | NNNNNCCATNTWNNNWN   | AGGCACCATTATGTGCC    |
| M0005 |           | 0.78604 |      |     |                     |                      |
| 9     | V\$YY1_01 | 2       | 2359 | (-) | NNNNNCCATNTWNNNWN   | CATTATATATGTGTATG    |
| M0005 |           |         |      |     |                     |                      |
| 9     | V\$YY1_01 | 0.77097 | 2371 | (-) | NNNNNCCATNTWNNNWN   | GTATGTATATGTGTATA    |
| M0005 |           | 0.77129 |      |     |                     |                      |
| 9     | V\$YY1_01 | 8       | 2492 | (-) | NNNNNCCATNTWNNNWN   | TTGTGTCTATGACTTTC    |
| M0005 |           | 0.84862 |      |     |                     |                      |
| 9     | V\$YY1_01 | 4       | 2541 | (-) | NNNNNCCATNTWNNNWN   | CATGTAAATGAATATA     |
| M0005 |           | 0.80570 |      |     |                     |                      |
| 9     | V\$YY1_01 | 1       | 2549 | (-) | NNNNNCCATNTWNNNWN   | ATGAATATATGATTAAC    |
| M0005 |           | 0.82437 |      |     |                     |                      |
| 9     | V\$YY1_01 | 7       | 2800 | (-) | NNNNNCCATNTWNNNWN   | GTGCAATCATGAAGAGC    |
| M0005 |           | 0.79292 |      |     |                     |                      |
| 9     | V\$YY1_01 | 3       | 2868 | (+) | NNNNNCCATNTWNNNWN   | TAATTGCATCTAATGAA    |
| M0005 |           | 0.77162 |      |     |                     |                      |
| 9     | V\$YY1_01 | 5       | 2935 | (-) | NNNNNCCATNTWNNNWN   | ATTCTAAATAGTTATA     |
| M0005 |           | 0.79554 |      |     |                     |                      |
| 9     | V\$YY1_01 | 4       | 2996 | (+) | NNNNNCCATNTWNNNWN   | GTAACTCATTTTACAT     |
| M0005 |           | 0.82568 |      |     |                     |                      |
| 9     | V\$YY1_01 | 8       | 3030 | (-) | NNNNNCCATNTWNNNWN   | TTTAAAAGATGTTCTGG    |
| M0005 |           | 0.85845 |      |     |                     |                      |
| 9     | V\$YY1_01 | 3       | 3045 | (+) | NNNNNCCATNTWNNNWN   | GGACATCAGTTTCAAG     |
| M0005 |           | 0.78735 |      |     |                     |                      |
| 9     | V\$YY1_01 | 3       | 3165 | (-) | NNNNNCCATNTWNNNWN   | ATTATAATATGCTCTAA    |
| M0005 |           | 0.81159 |      |     |                     |                      |
| 9     | V\$YY1_01 | 9       | 3317 | (+) | NNNNNCCATNTWNNNWN   | TTTTACCAGTTTCAAAG    |
| M0005 |           | 0.82863 |      |     |                     |                      |
| 9     | V\$YY1_01 | 7       | 3426 | (+) | NNNNNCCATNTWNNNWN   | ACTGTCCATAATCAAAT    |
| M0005 |           | 0.84207 |      |     |                     |                      |
| 9     | V\$YY1_01 | 1       | 3549 | (+) | NNNNNCCATNTWNNNWN   | CATTGTCATTTTGGCTA    |
| M0005 |           | 0.77850 |      |     |                     |                      |
| 9     | V\$YY1_01 | 6       | 3803 | (-) | NNNNNCCATNTWNNNWN   | GAACGACTATGACATTC    |
| M0005 |           | 0.82798 |      |     |                     |                      |
| 9     | V\$YY1_01 | 2       | 3869 | (+) | NNNNNCCATNTWNNNWN   | CCTGCACATTTTGAAAG    |
| M0005 |           | 0.80111 |      |     |                     |                      |
| 9     | V\$YY1_01 | 4       | 4201 | (-) | NNNNNCCATNTWNNNWN   | AAAAGAATATGAAAACG    |
| M0005 |           | 0.77162 |      |     |                     |                      |
| 9     | V\$YY1_01 | 5       | 4216 | (+) | NNNNNCCATNTWNNNWN   | CGAATACATGTATATAT    |
| M0005 |           | 0.78079 |      |     |                     |                      |
| 9     | V\$YY1_01 | 9       | 4269 | (+) | NNNNNCCATNTWNNNWN   | TGACACAATATTGTAAA    |
| M0005 |           | 0.77391 |      |     |                     |                      |
| 9     | V\$YY1_01 | 9       | 4278 | (-) | NNNNNCCATNTWNNNWN   | ATTGTAAACTGACTGTA    |
| M0005 |           | 0.81356 |      |     |                     |                      |
| 9     | V\$YY1_01 | 5       | 4359 | (+) | NNNNNCCATNTWNNNWN   | TGATAGCATCTTTTATG    |
| M0005 |           | 0.78309 |      |     |                     |                      |
| 9     | V\$YY1_01 | 3       | 4374 | (-) | NNNNNCCATNTWNNNWN   | TGTGCTAAATGTATTCC    |
| M0005 |           | 0.81094 |      |     |                     |                      |
| 9     | V\$YY1_01 | 4       | 4436 | (-) | NNNNNCCATNTWNNNWN   | ATTATGAGATGAACTGC    |
| M0005 |           | 0.79226 |      |     |                     |                      |
| 9     | V\$YY1_01 | 7       | 4601 | (+) | NNNNNCCATNTWNNNWN   | GATATCCAGATGTTATG    |
| M0005 |           | 0.77522 |      |     |                     |                      |
| 9     | V\$YY1_01 | 9       | 4653 | (-) | NNNNNCCATNTWNNNWN   | AAAGCTTTATGGTTAGC    |
| M0005 |           | 0.78243 |      |     |                     |                      |
| 9     | V\$YY1_01 | 8       | 4677 | (+) | NNNNNCCATNTWNNNWN   | AACAAACATTTCAGGAC    |
| M0005 |           |         |      |     |                     |                      |
| 9     | V\$YY1_01 | 0.79751 | 4693 | (+) | NNNNNCCATNTWNNNWN   | CATAATCATTGATCATT    |
| M0005 |           | 0.77031 |      |     |                     |                      |
| 9     | V\$YY1_01 | 5       | 4700 | (+) | NNNNNCCATNTWNNNWN   | ATTGATCATTTATTTTT    |
| M0005 |           | 0.79914 |      |     |                     |                      |
| 9     | V\$YY1_01 | 8       | 4728 | (-) | NNNNNCCATNTWNNNWN   | GTGTAAGTATGAAAAC     |
| M0005 |           | 0.81192 |      |     |                     |                      |
| 9     | V\$YY1_01 | 7       | 4769 | (+) | NNNNNCCATNTWNNNWN   | AGAGATCATGTTTCTTG    |

|       |            |         |      |     |                   |                     |
|-------|------------|---------|------|-----|-------------------|---------------------|
| M0005 |            | 0.83977 |      |     |                   |                     |
| 9     | V\$YY1_01  | 7       | 4805 | (-) | NNNNNCCATNTWNNNWN | ATACGAAAATGAATGTA   |
| M0005 |            | 0.79423 |      |     |                   |                     |
| 9     | V\$YY1_01  | 3       | 4908 | (+) | NNNNNCCATNTWNNNWN | AATATTCATATTACTTT   |
| M0005 |            | 0.87024 |      |     |                   |                     |
| 9     | V\$YY1_01  | 9       | 5088 | (+) | NNNNNCCATNTWNNNWN | AACTGCCATTTTAAAAT   |
| M0005 |            | 0.83813 |      |     |                   |                     |
| 9     | V\$YY1_01  | 9       | 5311 | (+) | NNNNNCCATNTWNNNWN | AGGAGCCATTTTTTTAA   |
| M0005 |            | 0.77948 |      |     |                   |                     |
| 9     | V\$YY1_01  | 9       | 5337 | (-) | NNNNNCCATNTWNNNWN | CTTCAAAAATCATCTTA   |
| M0005 |            | 0.80439 |      |     |                   |                     |
| 9     | V\$YY1_01  | 1       | 5341 | (+) | NNNNNCCATNTWNNNWN | AAAAATCATCTTAATAG   |
| M0005 |            | 0.77883 |      |     |                   |                     |
| 9     | V\$YY1_01  | 4       | 5371 | (-) | NNNNNCCATNTWNNNWN | TATTCTCAATGTTCTTC   |
| M0005 |            | 0.80504 |      |     |                   |                     |
| 9     | V\$YY1_01  | 6       | 5410 | (-) | NNNNNCCATNTWNNNWN | AATACAAACTGAATATA   |
| M0005 |            | 0.77719 |      |     |                   |                     |
| 9     | V\$YY1_01  | 5       | 5437 | (+) | NNNNNCCATNTWNNNWN | ATTTTTCATTTAAGCAA   |
| M0005 |            | 0.77817 |      |     |                   |                     |
| 9     | V\$YY1_01  | 8       | 5677 | (-) | NNNNNCCATNTWNNNWN | AAGAAAACATGTTTTGT   |
| M0005 |            | 0.80373 |      |     |                   |                     |
| 9     | V\$YY1_01  | 5       | 5678 | (+) | NNNNNCCATNTWNNNWN | AGAAAACATGTTTGTGTC  |
| M0005 |            | 0.85779 |      |     |                   |                     |
| 9     | V\$YY1_01  | 8       | 5840 | (-) | NNNNNCCATNTWNNNWN | GTAGAGACATGGACTCC   |
| M0005 |            | 0.77883 |      |     |                   |                     |
| 9     | V\$YY1_01  | 4       | 5896 | (-) | NNNNNCCATNTWNNNWN | ATATTA AAAATGCCTTTT |
| M0005 |            | 0.79423 |      |     |                   |                     |
| 9     | V\$YY1_01  | 3       | 5932 | (+) | NNNNNCCATNTWNNNWN | AAACCCCATAAAATAAT   |
| M0005 |            | 0.81094 |      |     |                   |                     |
| 9     | V\$YY1_01  | 4       | 5966 | (+) | NNNNNCCATNTWNNNWN | AGTCATCAGTTAGCAAT   |
| M0005 |            | 0.77457 |      |     |                   |                     |
| 9     | V\$YY1_01  | 4       | 6022 | (+) | NNNNNCCATNTWNNNWN | TGGTATCATCTTATAGG   |
| M0005 |            | 0.81618 |      |     |                   |                     |
| 9     | V\$YY1_01  | 6       | 6107 | (-) | NNNNNCCATNTWNNNWN | GGAAAAAATGAAAACA    |
| M0005 |            | 0.84370 |      |     |                   |                     |
| 9     | V\$YY1_01  | 9       | 6171 | (+) | NNNNNCCATNTWNNNWN | AAGATCCATCTCTGAAT   |
| M0005 |            | 0.78505 |      |     |                   |                     |
| 9     | V\$YY1_01  | 9       | 6236 | (-) | NNNNNCCATNTWNNNWN | CTGTTTGAATGAATACA   |
| M0005 |            | 0.85845 |      |     |                   |                     |
| 9     | V\$YY1_01  | 3       | 6323 | (-) | NNNNNCCATNTWNNNWN | CTATTTATATGGAAAGA   |
| M0005 |            | 0.80537 |      |     |                   |                     |
| 9     | V\$YY1_01  | 4       | 6342 | (+) | NNNNNCCATNTWNNNWN | TAATGACATATTTTTAT   |
| M0005 |            | 0.78702 |      |     |                   |                     |
| 9     | V\$YY1_01  | 5       | 6371 | (-) | NNNNNCCATNTWNNNWN | TCAATAGAATGGAGTCA   |
| M0005 |            | 0.78800 |      |     |                   |                     |
| 9     | V\$YY1_01  | 8       | 6565 | (-) | NNNNNCCATNTWNNNWN | TTACAAACATGTGGTGA   |
| M0005 |            | 0.77850 |      |     |                   |                     |
| 9     | V\$YY1_01  | 6       | 6581 | (+) | NNNNNCCATNTWNNNWN | AGAATACATATATATAT   |
| M0005 |            | 0.78342 |      |     |                   |                     |
| 9     | V\$YY1_01  | 1       | 6593 | (+) | NNNNNCCATNTWNNNWN | TATATACATATAAATAT   |
| M0005 |            | 0.79161 |      |     |                   |                     |
| 9     | V\$YY1_01  | 2       | 6600 | (-) | NNNNNCCATNTWNNNWN | ATATAAATATGAAAAAA   |
| M0005 |            | 0.80602 |      |     |                   |                     |
| 9     | V\$YY1_01  | 9       | 6610 | (-) | NNNNNCCATNTWNNNWN | GAAAAAATATGTACGTA   |
| M0005 |            | 0.77424 |      |     |                   |                     |
| 9     | V\$YY1_01  | 6       | 6707 | (+) | NNNNNCCATNTWNNNWN | ATGCAACATTTACTGAG   |
| M0016 |            | 0.83437 |      |     |                   |                     |
| 2     | V\$OCT1_06 | 5       | 23   | (-) | CWNAWTKWSATRYN    | TAAATGACAACTCT      |
| M0016 |            | 0.80820 |      |     |                   |                     |
| 2     | V\$OCT1_06 | 3       | 95   | (+) | CWNAWTKWSATRYN    | AAATCTTTCCTTTT      |
| M0016 |            | 0.87343 |      |     |                   |                     |
| 2     | V\$OCT1_06 | 7       | 104  | (+) | CWNAWTKWSATRYN    | CTTTTTGTCATCTT      |
| M0013 |            | 0.85262 |      |     |                   |                     |
| 7     | V\$OCT1_03 | 7       | 125  | (+) | NNNRTAATNANNN     | GGTGTAATGTAGG       |
| M0019 |            | 0.80349 |      |     |                   |                     |
| 5     | V\$OCT1_Q6 | 3       | 138  | (+) | NNNNATGCAAATNAN   | AGGAAGATAAATCAC     |

|       |            |         |     |     |                     |                         |
|-------|------------|---------|-----|-----|---------------------|-------------------------|
| M0016 |            | 0.88906 |     |     |                     |                         |
| 2     | V\$OCT1_06 | 2       | 144 | (+) | CWNAWTKWSATRYN      | ATAAATCACATGCT          |
| M0016 |            | 0.92460 |     |     |                     |                         |
| 2     | V\$OCT1_06 | 9       | 145 | (-) | CWNAWTKWSATRYN      | TAAATCACATGCTG          |
| M0019 |            | 0.80540 |     |     |                     |                         |
| 5     | V\$OCT1_Q6 | 4       | 152 | (+) | NNNNATGCAAATNAN     | CATGCTGCAAAGCAC         |
| M0016 |            | 0.80117 |     |     |                     |                         |
| 2     | V\$OCT1_06 | 2       | 170 | (+) | CWNAWTKWSATRYN      | CACCCTTTAATTAG          |
| M0013 |            | 0.84235 |     |     |                     |                         |
| 7     | V\$OCT1_03 | 5       | 205 | (-) | NNNRATAATNANNN      | TCTTCTTTACAGT           |
| M0016 |            | 0.83437 |     |     |                     |                         |
| 2     | V\$OCT1_06 | 5       | 206 | (+) | CWNAWTKWSATRYN      | CTTCTTTACAGTTG          |
| M0016 |            | 0.81601 |     |     |                     |                         |
| 2     | V\$OCT1_06 | 6       | 248 | (+) | CWNAWTKWSATRYN      | AGACCTGACAGGCA          |
| M0013 |            | 0.89924 |     |     |                     |                         |
| 7     | V\$OCT1_03 | 9       | 268 | (+) | NNNRATAATNANNN      | AAGGTAATCAAAT           |
| M0013 |            | 0.79799 |     |     | NNNNNNNWATGCAAATNNN |                         |
| 8     | V\$OCT1_04 | 2       | 271 | (+) | WNNW                | GTAATCAAATTGAAATGTCCAGA |
| M0016 |            | 0.95859 |     |     |                     |                         |
| 2     | V\$OCT1_06 | 4       | 276 | (+) | CWNAWTKWSATRYN      | CAAATTGAAATGTC          |
| M0016 |            | 0.82187 |     |     |                     |                         |
| 2     | V\$OCT1_06 | 5       | 276 | (-) | CWNAWTKWSATRYN      | CAAATTGAAATGTC          |
| M0016 |            | 0.80820 |     |     |                     |                         |
| 2     | V\$OCT1_06 | 3       | 277 | (-) | CWNAWTKWSATRYN      | AAATTGAAATGTCC          |
| M0013 |            | 0.86171 |     |     |                     |                         |
| 7     | V\$OCT1_03 | 5       | 315 | (+) | NNNRATAATNANNN      | GAGTTAATCATAA           |
| M0013 |            | 0.85894 |     |     |                     |                         |
| 7     | V\$OCT1_03 | 9       | 321 | (+) | NNNRATAATNANNN      | ATCATAATTTCTT           |
| M0016 |            |         |     |     |                     |                         |
| 2     | V\$OCT1_06 | 0.825   | 323 | (+) | CWNAWTKWSATRYN      | CATAATTTCTTCCT          |
| M0013 |            | 0.92149 |     |     |                     |                         |
| 6     | V\$OCT1_02 | 4       | 354 | (-) | NNGAATATKCANNNN     | AGCTTGAATATGCCT         |
| M0013 |            | 0.81723 |     |     | NNNNNNNWATGCAAATNNN |                         |
| 8     | V\$OCT1_04 | 1       | 354 | (-) | WNNW                | AGCTTGAATATGCCTTGGCATCA |
| M0013 |            | 0.86193 |     |     |                     |                         |
| 6     | V\$OCT1_02 | 8       | 357 | (+) | NNGAATATKCANNNN     | TTGAATATGCCTTGG         |
| M0013 |            | 0.78502 |     |     | NNNNNNNWATGCAAATNNN |                         |
| 8     | V\$OCT1_04 | 7       | 360 | (-) | WNNW                | AATATGCCTTGGCATCATTTGA  |
| M0016 |            | 0.83164 |     |     |                     |                         |
| 2     | V\$OCT1_06 | 1       | 373 | (+) | CWNAWTKWSATRYN      | ATCATTTTGACATT          |
| M0016 |            | 0.85546 |     |     |                     |                         |
| 2     | V\$OCT1_06 | 9       | 375 | (+) | CWNAWTKWSATRYN      | CATTTTGACATTAG          |
| M0016 |            | 0.89843 |     |     |                     |                         |
| 2     | V\$OCT1_06 | 7       | 399 | (+) | CWNAWTKWSATRYN      | AAACCTTAGATTCT          |
| M0013 |            | 0.79464 |     |     | NNNNNNNWATGCAAATNNN |                         |
| 8     | V\$OCT1_04 | 7       | 402 | (-) | WNNW                | CCTTAGATTCTGTATAATGTTAT |
| M0013 |            | 0.88779 |     |     |                     |                         |
| 7     | V\$OCT1_03 | 1       | 412 | (+) | NNNRATAATNANNN      | TGTATAATGTTAT           |
| M0013 |            | 0.79966 |     |     | NNNNNNNWATGCAAATNNN |                         |
| 8     | V\$OCT1_04 | 5       | 415 | (+) | WNNW                | ATAATGTTATGATTAAATTATT  |
| M0013 |            | 0.84077 |     |     |                     |                         |
| 7     | V\$OCT1_03 | 4       | 421 | (-) | NNNRATAATNANNN      | TTATGATTAAATT           |
| M0016 |            | 0.82656 |     |     |                     |                         |
| 2     | V\$OCT1_06 | 2       | 446 | (+) | CWNAWTKWSATRYN      | CACTTTGGGTATT           |
| M0013 |            | 0.82559 |     |     | NNNNNNNWATGCAAATNNN |                         |
| 8     | V\$OCT1_04 | 6       | 487 | (+) | WNNW                | TGAAGACAATGTAAATTGTAAAG |
| M0013 |            | 0.75314 |     |     |                     |                         |
| 5     | V\$OCT1_01 | 8       | 489 | (+) | NNNNWTATGCAAATNTNNN | AAGACAATGTAAATTGTAA     |
| M0016 |            | 0.80859 |     |     |                     |                         |
| 2     | V\$OCT1_06 | 4       | 491 | (+) | CWNAWTKWSATRYN      | GACAATGTAAATTG          |
| M0019 |            | 0.86271 |     |     |                     |                         |
| 5     | V\$OCT1_Q6 | 8       | 491 | (+) | NNNNATGCAAATNAN     | GACAATGTAAATTGT         |
| M0024 |            | 0.89590 |     |     |                     |                         |
| 8     | V\$OCT1_07 | 8       | 492 | (+) | TNTATGNTAATT        | ACAATGTAAATT            |
| M0013 |            |         |     |     | NNNNNNNWATGCAAATNNN |                         |
| 8     | V\$OCT1_04 | 0.79611 | 493 | (+) | WNNW                | CAATGTAAATTGTAAAGAAAAGT |

|       |            |         |     |     |                     |                         |
|-------|------------|---------|-----|-----|---------------------|-------------------------|
| M0013 |            |         |     |     |                     |                         |
| 7     | V\$OCT1_03 | 0.86211 | 501 | (+) | NNNRTAATNANNN       | ATTGTAAAGAAAA           |
| M0016 |            | 0.84726 |     |     |                     |                         |
| 2     | V\$OCT1_06 | 6       | 561 | (-) | CWNAWTKWSATRYN      | AACTTCTCAGAAAG          |
| M0013 |            | 0.87198 |     |     |                     |                         |
| 7     | V\$OCT1_03 | 7       | 583 | (+) | NNNRTAATNANNN       | GTCATAATAATCC           |
| M0016 |            | 0.80078 |     |     |                     |                         |
| 2     | V\$OCT1_06 | 1       | 588 | (-) | CWNAWTKWSATRYN      | AATAATCCAGACTG          |
| M0013 |            |         |     |     | NNNNNNNWATGCAAATNNN |                         |
| 8     | V\$OCT1_04 | 0.79381 | 606 | (+) | WNNW                | CTTAAC TAATTTAAAATTTTAT |
| M0013 |            |         |     |     | NNNNNNNWATGCAAATNNN |                         |
| 8     | V\$OCT1_04 | 0.82476 | 608 | (-) | WNNW                | TAAC TAATTTAAAATTTTATTT |
| M0016 |            | 0.85273 |     |     |                     |                         |
| 2     | V\$OCT1_06 | 4       | 611 | (+) | CWNAWTKWSATRYN      | CTAATTTAAAATTT          |
| M0016 |            | 0.80859 |     |     |                     |                         |
| 2     | V\$OCT1_06 | 4       | 611 | (-) | CWNAWTKWSATRYN      | CTAATTTAAAATTT          |
| M0019 |            | 0.79967 |     |     |                     |                         |
| 5     | V\$OCT1_Q6 | 2       | 611 | (-) | NNNNATGCAAATNAN     | CTAATTTAAAATTTT         |
| M0016 |            | 0.82656 |     |     |                     |                         |
| 2     | V\$OCT1_06 | 2       | 612 | (-) | CWNAWTKWSATRYN      | TAATTTAAAATTTT          |
| M0013 |            | 0.81681 |     |     | NNNNNNNWATGCAAATNNN |                         |
| 8     | V\$OCT1_04 | 3       | 614 | (-) | WNNW                | ATTTAAAATTTTATTTCTATCT  |
| M0016 |            | 0.84765 |     |     |                     |                         |
| 2     | V\$OCT1_06 | 6       | 618 | (+) | CWNAWTKWSATRYN      | AAAATTTTATTTCT          |
| M0013 |            | 0.84525 |     |     | NNNNNNNWATGCAAATNNN |                         |
| 8     | V\$OCT1_04 | 3       | 619 | (+) | WNNW                | AAATTTTATTTCTATCTAAAGA  |
| M0016 |            | 0.80039 |     |     |                     |                         |
| 2     | V\$OCT1_06 | 1       | 619 | (+) | CWNAWTKWSATRYN      | AAATTTTATTTCT           |
| M0013 |            | 0.78230 |     |     | NNNNNNNWATGCAAATNNN |                         |
| 8     | V\$OCT1_04 | 9       | 625 | (+) | WNNW                | TTATTTCTATCTAAAGATTATAA |
| M0016 |            | 0.84726 |     |     |                     |                         |
| 2     | V\$OCT1_06 | 6       | 630 | (-) | CWNAWTKWSATRYN      | TCTATCTAAAGATT          |
| M0013 |            | 0.84867 |     |     |                     |                         |
| 7     | V\$OCT1_03 | 6       | 636 | (-) | NNNRTAATNANNN       | TAAAGATTATAAT           |
| M0016 |            | 0.82695 |     |     |                     |                         |
| 2     | V\$OCT1_06 | 3       | 638 | (+) | CWNAWTKWSATRYN      | AAGATTATAATTTT          |
| M0013 |            | 0.85776 |     |     |                     |                         |
| 7     | V\$OCT1_03 | 4       | 641 | (+) | NNNRTAATNANNN       | ATTATAATTTTAT           |
| M0016 |            | 0.81210 |     |     |                     |                         |
| 2     | V\$OCT1_06 | 9       | 643 | (+) | CWNAWTKWSATRYN      | TATAATTTTATACG          |
| M0013 |            | 0.78377 |     |     | NNNNNNNWATGCAAATNNN |                         |
| 8     | V\$OCT1_04 | 2       | 663 | (+) | WNNW                | TATAACTTTTTTAAAAATTATGA |
| M0013 |            | 0.78168 |     |     | NNNNNNNWATGCAAATNNN |                         |
| 8     | V\$OCT1_04 | 1       | 663 | (-) | WNNW                | TATAACTTTTTTAAAAATTATGA |
| M0016 |            | 0.83945 |     |     |                     |                         |
| 2     | V\$OCT1_06 | 3       | 668 | (+) | CWNAWTKWSATRYN      | CTTTTTTAAAAATT          |
| M0013 |            | 0.87791 |     |     |                     |                         |
| 7     | V\$OCT1_03 | 4       | 674 | (-) | NNNRTAATNANNN       | TAAAAATTATGAG           |
| M0013 |            | 0.79485 |     |     | NNNNNNNWATGCAAATNNN |                         |
| 8     | V\$OCT1_04 | 6       | 678 | (-) | WNNW                | AATTATGAGTTACATATCCTCAC |
| M0016 |            | 0.84179 |     |     |                     |                         |
| 2     | V\$OCT1_06 | 7       | 678 | (+) | CWNAWTKWSATRYN      | AATTATGAGTTACA          |
| M0016 |            | 0.85546 |     |     |                     |                         |
| 2     | V\$OCT1_06 | 9       | 682 | (+) | CWNAWTKWSATRYN      | ATGAGTTACATATC          |
| M0019 |            | 0.81604 |     |     |                     |                         |
| 5     | V\$OCT1_Q6 | 8       | 682 | (-) | NNNNATGCAAATNAN     | ATGAGTTACATATCC         |
| M0013 |            | 0.79723 |     |     |                     |                         |
| 6     | V\$OCT1_02 | 9       | 684 | (-) | NNGAATATKCANNNN     | GAGTTACATATCCTC         |
| M0013 |            | 0.81618 |     |     |                     |                         |
| 6     | V\$OCT1_02 | 8       | 703 | (-) | NNGAATATKCANNNN     | AAGCTGAATAGTTCT         |
| M0013 |            | 0.83709 |     |     | NNNNNNNWATGCAAATNNN |                         |
| 8     | V\$OCT1_04 | 7       | 751 | (-) | WNNW                | TGGTTTAAGTAACATAAGTAAAT |
| M0013 |            | 0.74742 |     |     |                     |                         |
| 5     | V\$OCT1_01 | 5       | 753 | (-) | NNNNWTATGCAAATNTNNN | GTTTAAGTAACATAAGTAA     |
| M0024 |            | 0.84566 |     |     |                     |                         |
| 8     | V\$OCT1_07 | 5       | 757 | (-) | TNTATGN TAATT       | AAGTAACATAAG            |

|       |            |         |     |     |                     |                          |
|-------|------------|---------|-----|-----|---------------------|--------------------------|
| M0013 |            | 0.77317 |     |     |                     |                          |
| 5     | V\$OCT1_01 | 8       | 760 | (+) | NNNNWTATGCAAATNTNNN | TAACATAAGTAAATTATGG      |
| M0019 |            | 0.82014 |     |     |                     |                          |
| 5     | V\$OCT1_Q6 | 2       | 762 | (+) | NNNNATGCAAATNAN     | ACATAAGTAAATTAT          |
| M0016 |            | 0.84726 |     |     |                     |                          |
| 2     | V\$OCT1_06 | 6       | 763 | (-) | CWNAWTKWSATRYN      | CATAAGTAAATTAT           |
| M0024 |            | 0.82170 |     |     |                     |                          |
| 8     | V\$OCT1_07 | 9       | 763 | (+) | TNTATGNTAATT        | CATAAGTAAATT             |
| M0013 |            | 0.78147 |     |     | NNNNNNNWATGCAAATNNN |                          |
| 8     | V\$OCT1_04 | 2       | 788 | (+) | WNNW                | TCTGATTTCTGTTTATGCTAAAA  |
| M0013 |            | 0.88739 |     |     |                     |                          |
| 7     | V\$OCT1_03 | 6       | 794 | (-) | NNNRTAATNANNN       | TTCTGTTTATGCT            |
| M0013 |            | 0.83207 |     |     | NNNNNNNWATGCAAATNNN |                          |
| 8     | V\$OCT1_04 | 9       | 794 | (+) | WNNW                | TTCTGTTTATGCTAAAAAAGAGG  |
| M0013 |            | 0.83002 |     |     |                     |                          |
| 5     | V\$OCT1_01 | 7       | 796 | (+) | NNNNWTATGCAAATNTNNN | CTGTTTATGCTAAAAAAGA      |
| M0013 |            | 0.77910 |     |     |                     |                          |
| 6     | V\$OCT1_02 | 1       | 796 | (+) | NNGAATATKCANNNN     | CTGTTTATGCTAAAA          |
| M0024 |            | 0.79923 |     |     |                     |                          |
| 8     | V\$OCT1_07 | 7       | 799 | (+) | TNTATGNTAATT        | TTTATGCTAAAA             |
| M0013 |            | 0.74437 |     |     |                     |                          |
| 5     | V\$OCT1_01 | 2       | 823 | (-) | NNNNWTATGCAAATNTNNN | TGTCATTTTACAGATTGCT      |
| M0016 |            | 0.81367 |     |     |                     |                          |
| 2     | V\$OCT1_06 | 2       | 826 | (-) | CWNAWTKWSATRYN      | CATTTTACAGATTG           |
| M0013 |            |         |     |     | NNNNNNNWATGCAAATNNN |                          |
| 8     | V\$OCT1_04 | 0.78189 | 847 | (+) | WNNW                | GACTGTGTGTGTAATCTGTATA   |
| M0013 |            | 0.77680 |     |     |                     |                          |
| 5     | V\$OCT1_01 | 3       | 849 | (+) | NNNNWTATGCAAATNTNNN | CTGTGTGTGTAATCTGTA       |
| M0019 |            | 0.82232 |     |     |                     |                          |
| 5     | V\$OCT1_Q6 | 5       | 851 | (+) | NNNNATGCAAATNAN     | GTGTGTGTAAATCTG          |
| M0016 |            |         |     |     |                     |                          |
| 2     | V\$OCT1_06 | 0.88125 | 852 | (-) | CWNAWTKWSATRYN      | TGTGTGTAAATCTG           |
| M0013 |            |         |     |     | NNNNNNNWATGCAAATNNN |                          |
| 8     | V\$OCT1_04 | 0.83187 | 854 | (-) | WNNW                | TGTGTAAATCTGTATATGTGTTA  |
| M0013 |            | 0.79799 |     |     | NNNNNNNWATGCAAATNNN |                          |
| 8     | V\$OCT1_04 | 2       | 855 | (+) | WNNW                | GTGTAAATCTGTATATGTGTTAT  |
| M0013 |            | 0.77680 |     |     |                     |                          |
| 5     | V\$OCT1_01 | 3       | 856 | (-) | NNNNWTATGCAAATNTNNN | TGTAAATCTGTATATGTGT      |
| M0013 |            | 0.78649 |     |     | NNNNNNNWATGCAAATNNN |                          |
| 8     | V\$OCT1_04 | 1       | 860 | (-) | WNNW                | AATCTGTATATGTGTTATAATTT  |
| M0016 |            | 0.82617 |     |     |                     |                          |
| 2     | V\$OCT1_06 | 2       | 865 | (+) | CWNAWTKWSATRYN      | GTATATGTGTTATA           |
| M0013 |            | 0.84116 |     |     |                     |                          |
| 7     | V\$OCT1_03 | 9       | 873 | (+) | NNNRTAATNANNN       | GTTATAATTTTGC            |
| M0016 |            | 0.80078 |     |     |                     |                          |
| 2     | V\$OCT1_06 | 1       | 887 | (-) | CWNAWTKWSATRYN      | TGAATTGAAAACAT           |
| M0013 |            | 0.78000 |     |     | NNNNNNNWATGCAAATNNN |                          |
| 8     | V\$OCT1_04 | 8       | 912 | (+) | WNNW                | TCTTAATCTTCCAATACTACAAAA |
| M0013 |            | 0.84483 |     |     | NNNNNNNWATGCAAATNNN |                          |
| 8     | V\$OCT1_04 | 5       | 932 | (+) | WNNW                | AAAAAGAAATGATAATTATGTGA  |
| M0019 |            | 0.83733 |     |     |                     |                          |
| 5     | V\$OCT1_Q6 | 6       | 936 | (+) | NNNNATGCAAATNAN     | AGAAATGATAATTAT          |
| M0016 |            | 0.92196 |     |     |                     |                          |
| 1     | V\$OCT1_05 | 6       | 937 | (-) | MKNATTTGCATAYY      | GAAATGATAATTAT           |
| M0016 |            | 0.83984 |     |     |                     |                          |
| 2     | V\$OCT1_06 | 4       | 937 | (-) | CWNAWTKWSATRYN      | GAAATGATAATTAT           |
| M0024 |            | 0.82955 |     |     |                     |                          |
| 8     | V\$OCT1_07 | 3       | 937 | (+) | TNTATGNTAATT        | GAAATGATAATT             |
| M0013 |            | 0.92848 |     |     |                     |                          |
| 7     | V\$OCT1_03 | 7       | 940 | (+) | NNNRTAATNANNN       | ATGATAATTATGT            |
| M0013 |            | 0.88818 |     |     |                     |                          |
| 7     | V\$OCT1_03 | 6       | 941 | (-) | NNNRTAATNANNN       | TGATAATTATGTG            |
| M0016 |            | 0.82109 |     |     |                     |                          |
| 2     | V\$OCT1_06 | 4       | 945 | (+) | CWNAWTKWSATRYN      | AATTATGTGACATG           |
| M0024 |            | 0.80602 |     |     |                     |                          |
| 8     | V\$OCT1_07 | 1       | 962 | (+) | TNTATGNTAATT        | GAAGTGGTAATT             |

|       |            |         |      |     |                     |                         |
|-------|------------|---------|------|-----|---------------------|-------------------------|
| M0013 |            | 0.89845 |      |     |                     |                         |
| 7     | V\$OCT1_03 | 9       | 965  | (+) | NNNRTAATNANNN       | GTGGTAATTATCA           |
| M0013 |            |         |      |     |                     |                         |
| 7     | V\$OCT1_03 | 0.88226 | 966  | (-) | NNNRTAATNANNN       | TGGTAATTATCAC           |
| M0019 |            | 0.79230 |      |     |                     |                         |
| 5     | V\$OCT1_Q6 | 3       | 979  | (+) | NNNNATGCAAATNAN     | TACAATGGCAATCAC         |
| M0013 |            | 0.86724 |      |     |                     |                         |
| 7     | V\$OCT1_03 | 6       | 983  | (+) | NNNRTAATNANNN       | ATGGCAATCACAT           |
| M0013 |            | 0.78335 |      |     | NNNNNNNWATGCAAATNNN |                         |
| 8     | V\$OCT1_04 | 4       | 986  | (+) | WNNW                | GCAATCACATTACAATATATAAA |
| M0013 |            | 0.77203 |      |     |                     |                         |
| 5     | V\$OCT1_01 | 4       | 989  | (-) | NNNNWTATGCAAATNTNNN | ATCACATTACAATATATAA     |
| M0013 |            | 0.89766 |      |     |                     |                         |
| 7     | V\$OCT1_03 | 9       | 989  | (-) | NNNRTAATNANNN       | ATCACATTACAAT           |
| M0016 |            | 0.86835 |      |     |                     |                         |
| 2     | V\$OCT1_06 | 9       | 991  | (-) | CWNAWTKWSATRYN      | CACATTACAATATA          |
| M0024 |            | 0.83442 |      |     |                     |                         |
| 8     | V\$OCT1_07 | 9       | 993  | (-) | TNTATGNTAATT        | CATTACAATATA            |
| M0013 |            | 0.82371 |      |     | NNNNNNNWATGCAAATNNN |                         |
| 8     | V\$OCT1_04 | 4       | 994  | (+) | WNNW                | ATTACAATATATAAATATATCAA |
| M0013 |            | 0.82057 |      |     | NNNNNNNWATGCAAATNNN |                         |
| 8     | V\$OCT1_04 | 7       | 995  | (-) | WNNW                | TTACAATATATAAATATATCAAA |
| M0013 |            | 0.79835 |      |     |                     |                         |
| 5     | V\$OCT1_01 | 9       | 996  | (+) | NNNNWTATGCAAATNTNNN | TACAATATATAAATATATC     |
| M0013 |            | 0.79736 |      |     | NNNNNNNWATGCAAATNNN |                         |
| 8     | V\$OCT1_04 | 5       | 997  | (-) | WNNW                | ACAATATATAAATATATCAAATC |
| M0016 |            | 0.84726 |      |     |                     |                         |
| 2     | V\$OCT1_06 | 6       | 999  | (+) | CWNAWTKWSATRYN      | AATATATAAATATA          |
| M0016 |            |         |      |     |                     |                         |
| 2     | V\$OCT1_06 | 0.825   | 999  | (-) | CWNAWTKWSATRYN      | AATATATAAATATA          |
| M0013 |            | 0.85065 |      |     |                     |                         |
| 7     | V\$OCT1_03 | 2       | 1001 | (+) | NNNRTAATNANNN       | TATATAAATATAT           |
| M0013 |            | 0.81074 |      |     | NNNNNNNWATGCAAATNNN |                         |
| 8     | V\$OCT1_04 | 9       | 1002 | (+) | WNNW                | ATATAAATATATCAAATCAACAT |
| M0016 |            | 0.86015 |      |     |                     |                         |
| 2     | V\$OCT1_06 | 6       | 1009 | (-) | CWNAWTKWSATRYN      | TATATCAAATCAAC          |
| M0016 |            | 0.81210 |      |     |                     |                         |
| 2     | V\$OCT1_06 | 9       | 1014 | (+) | CWNAWTKWSATRYN      | CAAATCAACATGTC          |
| M0016 |            | 0.81367 |      |     |                     |                         |
| 2     | V\$OCT1_06 | 2       | 1014 | (-) | CWNAWTKWSATRYN      | CAAATCAACATGTC          |
| M0024 |            | 0.80326 |      |     |                     |                         |
| 8     | V\$OCT1_07 | 5       | 1016 | (-) | TNTATGNTAATT        | AATCAACATGTC            |
| M0016 |            | 0.95820 |      |     |                     |                         |
| 2     | V\$OCT1_06 | 3       | 1019 | (+) | CWNAWTKWSATRYN      | CAACATGTCATATA          |
| M0016 |            | 0.88359 |      |     |                     |                         |
| 2     | V\$OCT1_06 | 4       | 1020 | (-) | CWNAWTKWSATRYN      | AACATGTCATATAA          |
| M0013 |            | 0.82538 |      |     | NNNNNNNWATGCAAATNNN |                         |
| 8     | V\$OCT1_04 | 7       | 1025 | (+) | WNNW                | GTCATATAATTTAAATTTACACA |
| M0013 |            | 0.89523 |      |     | NNNNNNNWATGCAAATNNN |                         |
| 8     | V\$OCT1_04 | 2       | 1026 | (-) | WNNW                | TCATATAATTTAAATTTACACAA |
| M0016 |            | 0.91679 |      |     |                     |                         |
| 2     | V\$OCT1_06 | 7       | 1030 | (+) | CWNAWTKWSATRYN      | ATAATTTAAATTTA          |
| M0019 |            | 0.84552 |      |     |                     |                         |
| 5     | V\$OCT1_Q6 | 4       | 1030 | (-) | NNNNATGCAAATNAN     | ATAATTTAAATTTAC         |
| M0024 |            | 0.83230 |      |     |                     |                         |
| 8     | V\$OCT1_07 | 9       | 1030 | (+) | TNTATGNTAATT        | ATAATTTAAATT            |
| M0016 |            | 0.82656 |      |     |                     |                         |
| 2     | V\$OCT1_06 | 2       | 1031 | (-) | CWNAWTKWSATRYN      | TAATTTAAATTTAC          |
| M0013 |            | 0.83458 |      |     | NNNNNNNWATGCAAATNNN |                         |
| 8     | V\$OCT1_04 | 8       | 1032 | (-) | WNNW                | AATTTAAATTTACACAATGTTAT |
| M0024 |            | 0.85160 |      |     |                     |                         |
| 8     | V\$OCT1_07 | 1       | 1032 | (-) | TNTATGNTAATT        | AATTTAAATTTA            |
| M0013 |            | 0.81056 |      |     |                     |                         |
| 5     | V\$OCT1_01 | 8       | 1034 | (-) | NNNNWTATGCAAATNTNNN | TTTAAATTTACACAATGTT     |
| M0024 |            | 0.84714 |      |     |                     |                         |
| 8     | V\$OCT1_07 | 9       | 1038 | (-) | TNTATGNTAATT        | AATTTACACAAT            |

|       |            |         |      |     |                 |                         |
|-------|------------|---------|------|-----|-----------------|-------------------------|
| M0016 |            | 0.88164 |      |     |                 |                         |
| 2     | V\$OCT1_06 | 1       | 1044 | (+) | CWNAWTKWSATRYN  | CACAATGTTATATG          |
| M0016 |            | 0.80703 |      |     |                 |                         |
| 2     | V\$OCT1_06 | 1       | 1046 | (+) | CWNAWTKWSATRYN  | CAATGTTATATGTC          |
| M0013 |            | 0.78356 |      |     | NNNNNNN         | WATGCAAATNNN            |
| 8     | V\$OCT1_04 | 3       | 1047 | (+) | WNNW            | AATGTTATATGTCTAATATATT  |
| M0016 |            | 0.83398 |      |     |                 |                         |
| 2     | V\$OCT1_06 | 4       | 1052 | (-) | CWNAWTKWSATRYN  | TATATGTCTAATAT          |
| M0016 |            | 0.83398 |      |     |                 |                         |
| 2     | V\$OCT1_06 | 4       | 1054 | (-) | CWNAWTKWSATRYN  | TATGTCTAATATAT          |
| M0013 |            | 0.79004 |      |     | NNNNNNN         | WATGCAAATNNN            |
| 8     | V\$OCT1_04 | 6       | 1059 | (-) | WNNW            | CTAATATATTTGTGTAAAAAAT  |
| M0013 |            | 0.81242 |      |     | NNNNNNN         | WATGCAAATNNN            |
| 8     | V\$OCT1_04 | 2       | 1062 | (+) | WNNW            | ATATATTTGTGTAAAAAATGAA  |
| M0016 |            | 0.83945 |      |     |                 |                         |
| 2     | V\$OCT1_06 | 3       | 1069 | (-) | CWNAWTKWSATRYN  | TGTGTAAAAAATG           |
| M0016 |            | 0.86054 |      |     |                 |                         |
| 2     | V\$OCT1_06 | 7       | 1077 | (-) | CWNAWTKWSATRYN  | AAAATGAAAAAAGG          |
| M0016 |            | 0.82148 |      |     |                 |                         |
| 2     | V\$OCT1_06 | 4       | 1090 | (+) | CWNAWTKWSATRYN  | GTAACGGCAAGTG           |
| M0016 |            | 0.82656 |      |     |                 |                         |
| 2     | V\$OCT1_06 | 2       | 1124 | (+) | CWNAWTKWSATRYN  | ATTCCTTTTCATTGA         |
| M0019 |            | 0.80513 |      |     |                 |                         |
| 5     | V\$OCT1_Q6 | 1       | 1124 | (-) | NNNNATGCAAATNAN | ATTCCTTTTCATTGAA        |
| M0013 |            | 0.81723 |      |     | NNNNNNN         | WATGCAAATNNN            |
| 8     | V\$OCT1_04 | 1       | 1126 | (-) | WNNW            | TCTTTTCATTGAAATTTGAGTTT |
| M0016 |            | 0.83476 |      |     |                 |                         |
| 2     | V\$OCT1_06 | 6       | 1130 | (+) | CWNAWTKWSATRYN  | TTCATTGAAATTTG          |
| M0016 |            | 0.81757 |      |     |                 |                         |
| 2     | V\$OCT1_06 | 8       | 1130 | (-) | CWNAWTKWSATRYN  | TTCATTGAAATTTG          |
| M0024 |            | 0.85435 |      |     |                 |                         |
| 8     | V\$OCT1_07 | 7       | 1130 | (+) | TNTATGNTAATT    | TTCATTGAAATT            |
| M0013 |            | 0.80112 |      |     | NNNNNNN         | WATGCAAATNNN            |
| 8     | V\$OCT1_04 | 9       | 1132 | (-) | WNNW            | CATTGAAATTTGAGTTTGCTTGT |
| M0016 |            | 0.80078 |      |     |                 |                         |
| 2     | V\$OCT1_06 | 1       | 1136 | (+) | CWNAWTKWSATRYN  | GAAATTTGAGTTTG          |
| M0016 |            | 0.84804 |      |     |                 |                         |
| 2     | V\$OCT1_06 | 7       | 1136 | (-) | CWNAWTKWSATRYN  | GAAATTTGAGTTTG          |
| M0013 |            | 0.78251 |      |     | NNNNNNN         | WATGCAAATNNN            |
| 8     | V\$OCT1_04 | 8       | 1223 | (-) | WNNW            | AGTCTTTCTAATCATTATTATCT |
| M0013 |            |         |      |     |                 |                         |
| 7     | V\$OCT1_03 | 0.88305 | 1227 | (+) | NNNR            | TAATNANNN               |
| M0013 |            | 0.91386 |      |     |                 |                         |
| 7     | V\$OCT1_03 | 8       | 1231 | (-) | NNNR            | TAATNANNN               |
| M0013 |            | 0.91386 |      |     |                 |                         |
| 7     | V\$OCT1_03 | 8       | 1234 | (-) | NNNR            | TAATNANNN               |
| M0016 |            | 0.82656 |      |     |                 |                         |
| 2     | V\$OCT1_06 | 2       | 1247 | (-) | CWNAWTKWSATRYN  | TGAATCAAAAGCAA          |
| M0016 |            | 0.82656 |      |     |                 |                         |
| 2     | V\$OCT1_06 | 2       | 1253 | (-) | CWNAWTKWSATRYN  | AAAAGCAAATGGAG          |
| M0013 |            | 0.86052 |      |     |                 |                         |
| 7     | V\$OCT1_03 | 9       | 1276 | (-) | NNNR            | TAATNANNN               |
| M0016 |            | 0.86054 |      |     |                 |                         |
| 2     | V\$OCT1_06 | 7       | 1320 | (-) | CWNAWTKWSATRYN  | TAAAACTCAGTTTG          |
| M0013 |            | 0.79759 |      |     |                 |                         |
| 5     | V\$OCT1_01 | 6       | 1325 | (+) | NNNNW           | TATGCAAATNTNNN          |
| M0016 |            | 0.82148 |      |     |                 |                         |
| 2     | V\$OCT1_06 | 4       | 1328 | (-) | CWNAWTKWSATRYN  | AGTTTGCAAGTCTC          |
| M0013 |            | 0.78586 |      |     | NNNNNNN         | WATGCAAATNNN            |
| 8     | V\$OCT1_04 | 4       | 1348 | (+) | WNNW            | ATACAAGTAGGTCAATAACAGTA |
| M0016 |            | 0.86015 |      |     |                 |                         |
| 2     | V\$OCT1_06 | 6       | 1353 | (-) | CWNAWTKWSATRYN  | AGTAGGTCAATAAC          |
| M0019 |            | 0.85234 |      |     |                 |                         |
| 5     | V\$OCT1_Q6 | 7       | 1384 | (-) | NNNNATGCAAATNAN | GTGGTTAGCATTTAT         |
| M0016 |            | 0.84218 |      |     |                 |                         |
| 2     | V\$OCT1_06 | 7       | 1390 | (-) | CWNAWTKWSATRYN  | AGCATTTATTTACAC         |

|       |            |         |      |     |                      |                          |
|-------|------------|---------|------|-----|----------------------|--------------------------|
| M0016 |            | 0.81835 |      |     |                      |                          |
| 2     | V\$OCT1_06 | 9       | 1396 | (-) | CWNAWTKWSATRYN       | TATTTTACAAATAC           |
| M0024 |            | 0.79520 |      |     |                      |                          |
| 8     | V\$OCT1_07 | 9       | 1404 | (-) | TNTATGNTAATT         | AAATACCACATA             |
| M0016 |            | 0.82617 |      |     |                      |                          |
| 2     | V\$OCT1_06 | 2       | 1405 | (-) | CWNAWTKWSATRYN       | AATACCACATATAC           |
| M0013 |            | 0.79527 |      |     | NNNNNNNNWATGCAAATNNN |                          |
| 8     | V\$OCT1_04 | 4       | 1409 | (+) | WNNW                 | CCACATATACTGAAATATTAATA  |
| M0016 |            | 0.86835 |      |     |                      |                          |
| 2     | V\$OCT1_06 | 9       | 1414 | (+) | CWNAWTKWSATRYN       | TATACTGAAATATT           |
| M0016 |            | 0.83671 |      |     |                      |                          |
| 2     | V\$OCT1_06 | 9       | 1421 | (+) | CWNAWTKWSATRYN       | AAATATTAATAAGCT          |
| M0016 |            | 0.89062 |      |     |                      |                          |
| 2     | V\$OCT1_06 | 5       | 1422 | (-) | CWNAWTKWSATRYN       | AATATTAATAAGCTT          |
| M0013 |            | 0.79506 |      |     | NNNNNNNNWATGCAAATNNN |                          |
| 8     | V\$OCT1_04 | 5       | 1437 | (-) | WNNW                 | AACTGTTATATGTATCTTTCTAA  |
| M0013 |            | 0.78711 |      |     | NNNNNNNNWATGCAAATNNN |                          |
| 8     | V\$OCT1_04 | 8       | 1438 | (+) | WNNW                 | ACTGTTATATGTATCTTTCTAA   |
| M0013 |            | 0.81785 |      |     | NNNNNNNNWATGCAAATNNN |                          |
| 8     | V\$OCT1_04 | 9       | 1459 | (+) | WNNW                 | AAAAGACTATTTTTAAAAAATCA  |
| M0013 |            | 0.78084 |      |     | NNNNNNNNWATGCAAATNNN |                          |
| 8     | V\$OCT1_04 | 5       | 1462 | (-) | WNNW                 | AGACTATTTTTAAAAAATCAAAT  |
| M0016 |            | 0.81328 |      |     |                      |                          |
| 2     | V\$OCT1_06 | 1       | 1466 | (-) | CWNAWTKWSATRYN       | TATTTTTAAAAAAT           |
| M0019 |            | 0.81222 |      |     |                      |                          |
| 5     | V\$OCT1_Q6 | 7       | 1473 | (+) | NNNNATGCAAATNAN      | AAAAAATCAAATAAG          |
| M0016 |            | 0.83203 |      |     |                      |                          |
| 2     | V\$OCT1_06 | 1       | 1474 | (-) | CWNAWTKWSATRYN       | AAAAATCAAATAAG           |
| M0016 |            | 0.83437 |      |     |                      |                          |
| 2     | V\$OCT1_06 | 5       | 1475 | (-) | CWNAWTKWSATRYN       | AAAATCAAATAAGC           |
| M0013 |            | 0.84077 |      |     |                      |                          |
| 7     | V\$OCT1_03 | 4       | 1480 | (+) | NNNRTAATNANNN        | CAAATAAGCAGGT            |
| M0013 |            | 0.80531 |      |     | NNNNNNNNWATGCAAATNNN |                          |
| 8     | V\$OCT1_04 | 2       | 1527 | (+) | WNNW                 | GTTTATTTCTTTAAATATTTTCAG |
| M0013 |            | 0.83563 |      |     | NNNNNNNNWATGCAAATNNN |                          |
| 8     | V\$OCT1_04 | 4       | 1528 | (-) | WNNW                 | TTTATTTCTTTAAATATTTTCAGT |
| M0016 |            | 0.84726 |      |     |                      |                          |
| 2     | V\$OCT1_06 | 6       | 1532 | (+) | CWNAWTKWSATRYN       | TTTCTTTAAATATT           |
| M0013 |            | 0.77991 |      |     |                      |                          |
| 6     | V\$OCT1_02 | 3       | 1534 | (-) | NNGAATATKCANNNN      | TCTTTAAATATTTCA          |
| M0016 |            | 0.82890 |      |     |                      |                          |
| 2     | V\$OCT1_06 | 6       | 1539 | (+) | CWNAWTKWSATRYN       | AAATATTTTCAGTCA          |
| M0016 |            | 0.84765 |      |     |                      |                          |
| 2     | V\$OCT1_06 | 6       | 1540 | (-) | CWNAWTKWSATRYN       | AATATTTTCAGTCAA          |
| M0013 |            |         |      |     | NNNNNNNNWATGCAAATNNN |                          |
| 8     | V\$OCT1_04 | 0.79862 | 1556 | (-) | WNNW                 | CCCTGTCATTGTCATACCTATGT  |
| M0013 |            | 0.73178 |      |     |                      |                          |
| 5     | V\$OCT1_01 | 2       | 1558 | (-) | NNNNWTATGCAAATNTNNN  | CTGTCATTGTCATACCTAT      |
| M0013 |            |         |      |     |                      |                          |
| 7     | V\$OCT1_03 | 0.84275 | 1558 | (-) | NNNRTAATNANNN        | CTGTCATTGTCAT            |
| M0016 |            | 0.85605 |      |     |                      |                          |
| 1     | V\$OCT1_05 | 2       | 1560 | (+) | MKNATTTGCATAYY       | GTCATTGTCATACC           |
| M0016 |            | 0.91679 |      |     |                      |                          |
| 2     | V\$OCT1_06 | 7       | 1560 | (+) | CWNAWTKWSATRYN       | GTCATTGTCATACC           |
| M0019 |            | 0.83269 |      |     |                      |                          |
| 5     | V\$OCT1_Q6 | 7       | 1560 | (-) | NNNNATGCAAATNAN      | GTCATTGTCATACCT          |
| M0013 |            | 0.85460 |      |     |                      |                          |
| 7     | V\$OCT1_03 | 3       | 1575 | (-) | NNNRTAATNANNN        | ATGTTTTTATTAA            |
| M0013 |            | 0.82685 |      |     | NNNNNNNNWATGCAAATNNN |                          |
| 8     | V\$OCT1_04 | 1       | 1576 | (-) | WNNW                 | TGTTTTTATTAAAAACAATCAAGT |
| M0013 |            |         |      |     |                      |                          |
| 7     | V\$OCT1_03 | 0.84196 | 1578 | (-) | NNNRTAATNANNN        | TTTTTATTAAAAAC           |
| M0016 |            | 0.80703 |      |     |                      |                          |
| 2     | V\$OCT1_06 | 1       | 1623 | (-) | CWNAWTKWSATRYN       | GAGAAGTAATTGTG           |
| M0013 |            | 0.85815 |      |     |                      |                          |
| 7     | V\$OCT1_03 | 9       | 1625 | (+) | NNNRTAATNANNN        | GAAGTAATTGTGA            |



|       |            |         |      |     |                      |                          |
|-------|------------|---------|------|-----|----------------------|--------------------------|
| M0013 |            | 0.86566 |      |     |                      |                          |
| 7     | V\$OCT1_03 | 6       | 1626 | (-) | NNNRTAATNANNN        | AAGTAATTGTGAA            |
| M0013 |            | 0.78649 |      |     | NNNNNNNNWATGCAAATNNN |                          |
| 8     | V\$OCT1_04 | 1       | 1666 | (-) | WNNW                 | TCCTCCATCTTACATGTTCTGT   |
| M0016 |            | 0.87617 |      |     |                      |                          |
| 2     | V\$OCT1_06 | 2       | 1670 | (+) | CWNAWTKWSATRYN       | CCATCTTACATGTT           |
| M0016 |            | 0.80820 |      |     |                      |                          |
| 2     | V\$OCT1_06 | 3       | 1671 | (-) | CWNAWTKWSATRYN       | CATCTTACATGTTCT          |
| M0013 |            | 0.78884 |      |     |                      |                          |
| 6     | V\$OCT1_02 | 7       | 1672 | (-) | NNGAATATKCANNNN      | ATCTTACATGTTCTCT         |
| M0016 |            | 0.86484 |      |     |                      |                          |
| 2     | V\$OCT1_06 | 4       | 1701 | (-) | CWNAWTKWSATRYN       | GGAATTACAGAATT           |
| M0016 |            | 0.80078 |      |     |                      |                          |
| 2     | V\$OCT1_06 | 1       | 1709 | (-) | CWNAWTKWSATRYN       | AGAATTTTAGAAAT           |
| M0016 |            | 0.83398 |      |     |                      |                          |
| 2     | V\$OCT1_06 | 4       | 1710 | (+) | CWNAWTKWSATRYN       | GAATTTTAGAAATT           |
| M0016 |            | 0.80039 |      |     |                      |                          |
| 2     | V\$OCT1_06 | 1       | 1712 | (+) | CWNAWTKWSATRYN       | ATTTTAGAAATTTT           |
| M0013 |            | 0.78230 |      |     | NNNNNNNNWATGCAAATNNN |                          |
| 8     | V\$OCT1_04 | 9       | 1713 | (+) | WNNW                 | TTTTAGAAATTTTAGTTCAAACCT |
| M0013 |            |         |      |     | NNNNNNNNWATGCAAATNNN |                          |
| 8     | V\$OCT1_04 | 0.7867  | 1714 | (-) | WNNW                 | TTTAGAAATTTTAGTTCAAACCT  |
| M0016 |            | 0.82656 |      |     |                      |                          |
| 2     | V\$OCT1_06 | 2       | 1718 | (+) | CWNAWTKWSATRYN       | GAAATTTTAGTTCA           |
| M0013 |            | 0.78460 |      |     | NNNNNNNNWATGCAAATNNN |                          |
| 8     | V\$OCT1_04 | 9       | 1726 | (-) | WNNW                 | AGTTCAAACCTTTCATTTATAGGT |
| M0013 |            |         |      |     |                      |                          |
| 5     | V\$OCT1_01 | 0.74628 | 1728 | (-) | NNNNWTATGCAAATNTNNN  | TTCAAACCTTTCATTTATAG     |
| M0016 |            | 0.95078 |      |     |                      |                          |
| 2     | V\$OCT1_06 | 1       | 1730 | (+) | CWNAWTKWSATRYN       | CAAACCTTTCATTTA          |
| M0016 |            | 0.83437 |      |     |                      |                          |
| 2     | V\$OCT1_06 | 5       | 1731 | (-) | CWNAWTKWSATRYN       | AAACCTTTCATTTAT          |
| M0013 |            | 0.77504 |      |     |                      |                          |
| 6     | V\$OCT1_02 | 1       | 1746 | (-) | NNGAATATKCANNNN      | GGTAAGAATAGTAAG          |
| M0024 |            | 0.79584 |      |     |                      |                          |
| 8     | V\$OCT1_07 | 5       | 1767 | (+) | TNTATGNTAATT         | ATAAAGGAAATT             |
| M0016 |            | 0.83437 |      |     |                      |                          |
| 2     | V\$OCT1_06 | 5       | 1768 | (-) | CWNAWTKWSATRYN       | TAAAGGAAATTACT           |
| M0013 |            | 0.78061 |      |     |                      |                          |
| 5     | V\$OCT1_01 | 8       | 1784 | (-) | NNNNWTATGCAAATNTNNN  | GACAAAATTGCACAAGTAG      |
| M0016 |            | 0.82929 |      |     |                      |                          |
| 2     | V\$OCT1_06 | 7       | 1808 | (+) | CWNAWTKWSATRYN       | GAGCCTGAGATGGA           |
| M0013 |            | 0.84630 |      |     |                      |                          |
| 7     | V\$OCT1_03 | 6       | 1886 | (-) | NNNRTAATNANNN        | CCTTGTTTACAAA            |
| M0016 |            | 0.85585 |      |     |                      |                          |
| 2     | V\$OCT1_06 | 9       | 1914 | (+) | CWNAWTKWSATRYN       | CAGACTGGCATGGG           |
| M0016 |            | 0.81171 |      |     |                      |                          |
| 2     | V\$OCT1_06 | 9       | 1929 | (-) | CWNAWTKWSATRYN       | AGCCTCTCCTTTTG           |
| M0016 |            | 0.82656 |      |     |                      |                          |
| 2     | V\$OCT1_06 | 2       | 1934 | (+) | CWNAWTKWSATRYN       | CTCCTTTTGCTGCC           |
| M0013 |            | 0.78523 |      |     | NNNNNNNNWATGCAAATNNN |                          |
| 8     | V\$OCT1_04 | 6       | 1979 | (-) | WNNW                 | TTTCTCCATTAAATGCCCATGG   |
| M0016 |            | 0.83476 |      |     |                      |                          |
| 2     | V\$OCT1_06 | 6       | 1983 | (-) | CWNAWTKWSATRYN       | TCCATTTAAATGCC           |
| M0013 |            | 0.80363 |      |     | NNNNNNNNWATGCAAATNNN |                          |
| 8     | V\$OCT1_04 | 9       | 1990 | (+) | WNNW                 | AAATGCCCATGGATATTCAGAAG  |
| M0013 |            | 0.85841 |      |     |                      |                          |
| 6     | V\$OCT1_02 | 9       | 1995 | (-) | NNGAATATKCANNNN      | CCCATGGATATTCAG          |
| M0013 |            | 0.89063 |      |     |                      |                          |
| 6     | V\$OCT1_02 | 3       | 1998 | (+) | NNGAATATKCANNNN      | ATGGATATTCAGAAG          |
| M0013 |            | 0.81263 |      |     | NNNNNNNNWATGCAAATNNN |                          |
| 8     | V\$OCT1_04 | 1       | 2018 | (-) | WNNW                 | CTCTTCTATTGAATGTTCTCTA   |
| M0013 |            | 0.75352 |      |     |                      |                          |
| 5     | V\$OCT1_01 | 9       | 2020 | (-) | NNNNWTATGCAAATNTNNN  | CTTCTATTTGAATGTTCTC      |
| M0019 |            | 0.79721 |      |     |                      |                          |
| 5     | V\$OCT1_Q6 | 6       | 2022 | (-) | NNNNATGCAAATNAN      | TCTATTTGAATGTTCTC        |

|       |            |         |      |     |                      |                         |
|-------|------------|---------|------|-----|----------------------|-------------------------|
| M0013 |            | 0.88115 |      |     |                      |                         |
| 6     | V\$OCT1_02 | 9       | 2024 | (-) | NNGAATATKCANNNNN     | TATTTGAATGTTCTC         |
| M0013 |            | 0.81639 |      |     | NNNNNNNNWATGCAAATNNN |                         |
| 8     | V\$OCT1_04 | 5       | 2039 | (-) | WNNW                 | TATTAATCTCTGCATGAGTAAGT |
| M0013 |            | 0.73960 |      |     |                      |                         |
| 5     | V\$OCT1_01 | 3       | 2105 | (-) | NNNNWTATGCAAATNTNNN  | TGAAAACCTCTATATGTAG     |
| M0013 |            | 0.73731 |      |     |                      |                         |
| 5     | V\$OCT1_01 | 4       | 2112 | (+) | NNNNWTATGCAAATNTNNN  | TTCTATATGTAGAAAGCCA     |
| M0016 |            | 0.86015 |      |     |                      |                         |
| 2     | V\$OCT1_06 | 6       | 2191 | (+) | CWNAWTKWSATRYN       | CTACAATTGATGCT          |
| M0013 |            | 0.87317 |      |     |                      |                         |
| 7     | V\$OCT1_03 | 3       | 2235 | (+) | NNNRATAATNANNN       | TTGATAATCTCAA           |
| M0016 |            | 0.80859 |      |     |                      |                         |
| 2     | V\$OCT1_06 | 4       | 2248 | (-) | CWNAWTKWSATRYN       | CACTTGACAGTGCC          |
| M0013 |            |         |      |     | NNNNNNNNWATGCAAATNNN |                         |
| 8     | V\$OCT1_04 | 0.79611 | 2260 | (-) | WNNW                 | CCTTGTTCTTTATATATATAAGC |
| M0013 |            | 0.78084 |      |     | NNNNNNNNWATGCAAATNNN |                         |
| 8     | V\$OCT1_04 | 5       | 2262 | (-) | WNNW                 | TTGTTCTTTATATATATAAGCTA |
| M0016 |            | 0.84726 |      |     |                      |                         |
| 2     | V\$OCT1_06 | 6       | 2264 | (+) | CWNAWTKWSATRYN       | GTTCTTTATATATA          |
| M0019 |            | 0.85507 |      |     |                      |                         |
| 5     | V\$OCT1_Q6 | 6       | 2264 | (-) | NNNNATGCAAATNAN      | GTTCTTTATATATAT         |
| M0013 |            | 0.78941 |      |     | NNNNNNNNWATGCAAATNNN |                         |
| 8     | V\$OCT1_04 | 9       | 2271 | (+) | WNNW                 | ATATATATAAGCTAAAATTTT   |
| M0013 |            | 0.78328 |      |     |                      |                         |
| 5     | V\$OCT1_01 | 9       | 2273 | (+) | NNNNWTATGCAAATNTNNN  | ATATATAAGCTAAAATTTT     |
| M0013 |            | 0.80949 |      |     | NNNNNNNNWATGCAAATNNN |                         |
| 8     | V\$OCT1_04 | 4       | 2279 | (+) | WNNW                 | AAGCTAAAATTTTATTTATAGG  |
| M0013 |            | 0.79443 |      |     | NNNNNNNNWATGCAAATNNN |                         |
| 8     | V\$OCT1_04 | 7       | 2280 | (-) | WNNW                 | AGCTAAAATTTTATTTATAGGT  |
| M0016 |            | 0.86054 |      |     |                      |                         |
| 2     | V\$OCT1_06 | 7       | 2284 | (+) | CWNAWTKWSATRYN       | AAAATTTTATTTA           |
| M0013 |            | 0.81012 |      |     | NNNNNNNNWATGCAAATNNN |                         |
| 8     | V\$OCT1_04 | 1       | 2285 | (+) | WNNW                 | AAATTTTATTTATAGGTAAGAA  |
| M0013 |            | 0.84420 |      |     | NNNNNNNNWATGCAAATNNN |                         |
| 8     | V\$OCT1_04 | 7       | 2313 | (-) | WNNW                 | CCTATAAATGTACATATATATT  |
| M0013 |            | 0.73044 |      |     |                      |                         |
| 5     | V\$OCT1_01 | 6       | 2314 | (+) | NNNNWTATGCAAATNTNNN  | CTATAAATGTACATATATA     |
| M0013 |            | 0.80468 |      |     | NNNNNNNNWATGCAAATNNN |                         |
| 8     | V\$OCT1_04 | 4       | 2314 | (+) | WNNW                 | CTATAAATGTACATATATATTTA |
| M0013 |            | 0.81018 |      |     |                      |                         |
| 5     | V\$OCT1_01 | 7       | 2315 | (-) | NNNNWTATGCAAATNTNNN  | TATAAATGTACATATATAT     |
| M0013 |            | 0.78816 |      |     | NNNNNNNNWATGCAAATNNN |                         |
| 8     | V\$OCT1_04 | 4       | 2316 | (+) | WNNW                 | ATAAATGTACATATATATTTATA |
| M0016 |            | 0.81171 |      |     |                      |                         |
| 2     | V\$OCT1_06 | 9       | 2317 | (+) | CWNAWTKWSATRYN       | TAAATGTACATATA          |
| M0013 |            | 0.84232 |      |     | NNNNNNNNWATGCAAATNNN |                         |
| 8     | V\$OCT1_04 | 5       | 2318 | (+) | WNNW                 | AAATGTACATATATATTTATAGG |
| M0024 |            | 0.86644 |      |     |                      |                         |
| 8     | V\$OCT1_07 | 1       | 2319 | (-) | TNTATGNTAATT         | AATGTACATATA            |
| M0013 |            | 0.78000 |      |     | NNNNNNNNWATGCAAATNNN |                         |
| 8     | V\$OCT1_04 | 8       | 2324 | (+) | WNNW                 | ACATATATATTTATAGGCACCAT |
| M0013 |            | 0.84907 |      |     |                      |                         |
| 7     | V\$OCT1_03 | 2       | 2328 | (-) | NNNRATAATNANNN       | ATATATTTATAGG           |
| M0013 |            | 0.80301 |      |     | NNNNNNNNWATGCAAATNNN |                         |
| 8     | V\$OCT1_04 | 1       | 2329 | (-) | WNNW                 | TATATTTATAGGCACCATTATGT |
| M0013 |            | 0.87356 |      |     |                      |                         |
| 7     | V\$OCT1_03 | 8       | 2340 | (-) | NNNRATAATNANNN       | GCACCATTATGTG           |
| M0013 |            | 0.74227 |      |     |                      |                         |
| 5     | V\$OCT1_01 | 4       | 2343 | (-) | NNNNWTATGCAAATNTNNN  | CCATTATGTGCCTATACAT     |
| M0013 |            |         |      |     |                      |                         |
| 6     | V\$OCT1_02 | 0.79778 | 2347 | (-) | NNGAATATKCANNNNN     | TATGTGCCTATACAT         |
| M0016 |            | 0.84218 |      |     |                      |                         |
| 2     | V\$OCT1_06 | 7       | 2356 | (+) | CWNAWTKWSATRYN       | ATACATTATATATG          |
| M0013 |            | 0.83396 |      |     | NNNNNNNNWATGCAAATNNN |                         |
| 8     | V\$OCT1_04 | 1       | 2358 | (-) | WNNW                 | ACATTATATATGTGTATGTATAT |

|       |            |         |      |     |                     |                          |
|-------|------------|---------|------|-----|---------------------|--------------------------|
| M0013 |            | 0.79360 |      |     | NNNNNNNWATGCAAATNNN |                          |
| 8     | V\$OCT1_04 | 1       | 2364 | (-) | WNNW                | TATATGTGTATGTATATGTGTAT  |
| M0013 |            | 0.87160 |      |     | NNNNNNNWATGCAAATNNN |                          |
| 8     | V\$OCT1_04 | 2       | 2365 | (+) | WNNW                | ATATGTGTATGTATATGTGTATA  |
| M0013 |            |         |      |     |                     |                          |
| 5     | V\$OCT1_01 | 0.78348 | 2367 | (+) | NNNNWTATGCAAATNTNNN | ATGTGTATGTATATGTGTA      |
| M0013 |            | 0.82496 |      |     | NNNNNNNWATGCAAATNNN |                          |
| 8     | V\$OCT1_04 | 9       | 2370 | (-) | WNNW                | TGTATGTATATGTGTATACATAG  |
| M0016 |            |         |      |     |                     |                          |
| 2     | V\$OCT1_06 | 0.88125 | 2370 | (-) | CWNAWTKWSATRYN      | TGTATGTATATGTG           |
| M0013 |            |         |      |     | NNNNNNNWATGCAAATNNN |                          |
| 8     | V\$OCT1_04 | 0.81054 | 2371 | (+) | WNNW                | GTATGTATATGTGTATACATAGG  |
| M0013 |            | 0.78749 |      |     |                     |                          |
| 6     | V\$OCT1_02 | 3       | 2373 | (+) | NNGAATATKCANNNN     | ATGTATATGTGTATA          |
| M0013 |            | 0.75238 |      |     |                     |                          |
| 5     | V\$OCT1_01 | 5       | 2374 | (-) | NNNNWTATGCAAATNTNNN | TGTATATGTGTATACATAG      |
| M0013 |            | 0.78544 |      |     | NNNNNNNWATGCAAATNNN |                          |
| 8     | V\$OCT1_04 | 5       | 2377 | (+) | WNNW                | ATATGTGTATACATAGGGACACA  |
| M0016 |            | 0.80429 |      |     |                     |                          |
| 2     | V\$OCT1_06 | 7       | 2411 | (+) | CWNAWTKWSATRYN      | CAAAGTTTAAAGTT           |
| M0013 |            | 0.80447 |      |     | NNNNNNNWATGCAAATNNN |                          |
| 8     | V\$OCT1_04 | 5       | 2417 | (+) | WNNW                | TTAAAGTTATTCAAACCTACCTGT |
| M0013 |            | 0.73025 |      |     |                     |                          |
| 5     | V\$OCT1_01 | 6       | 2419 | (+) | NNNNWTATGCAAATNTNNN | AAAGTTATTCAAACCTACCT     |
| M0013 |            | 0.80833 |      |     |                     |                          |
| 6     | V\$OCT1_02 | 8       | 2419 | (+) | NNGAATATKCANNNN     | AAAGTTATTCAAACCT         |
| M0019 |            |         |      |     |                     |                          |
| 5     | V\$OCT1_Q6 | 0.79012 | 2421 | (+) | NNNNATGCAAATNAN     | AGTTATTCAAACCTAC         |
| M0016 |            | 0.82656 |      |     |                     |                          |
| 2     | V\$OCT1_06 | 2       | 2432 | (+) | CWNAWTKWSATRYN      | CTACCTGTCCTTCT           |
| M0016 |            |         |      |     |                     |                          |
| 2     | V\$OCT1_06 | 0.86875 | 2452 | (+) | CWNAWTKWSATRYN      | CAGAATAAAATTCT           |
| M0016 |            | 0.85546 |      |     |                     |                          |
| 2     | V\$OCT1_06 | 9       | 2453 | (-) | CWNAWTKWSATRYN      | AGAATAAAATTCTC           |
| M0013 |            | 0.78072 |      |     |                     |                          |
| 6     | V\$OCT1_02 | 6       | 2455 | (+) | NNGAATATKCANNNN     | AATAAAATTCTCATG          |
| M0016 |            |         |      |     |                     |                          |
| 2     | V\$OCT1_06 | 0.88125 | 2458 | (+) | CWNAWTKWSATRYN      | AAAATTCTCATGTA           |
| M0013 |            | 0.78544 |      |     | NNNNNNNWATGCAAATNNN |                          |
| 8     | V\$OCT1_04 | 5       | 2459 | (+) | WNNW                | AAATTCTCATGTAATTTAATTAT  |
| M0016 |            | 0.81992 |      |     |                     |                          |
| 2     | V\$OCT1_06 | 2       | 2464 | (-) | CWNAWTKWSATRYN      | CTCATGTAATTTAA           |
| M0013 |            | 0.82287 |      |     | NNNNNNNWATGCAAATNNN |                          |
| 8     | V\$OCT1_04 | 7       | 2465 | (-) | WNNW                | TCATGTAATTTAATTATTTATAA  |
| M0013 |            |         |      |     |                     |                          |
| 7     | V\$OCT1_03 | 0.84196 | 2466 | (+) | NNNRATATNANNN       | CATGTAATTTAAT            |
| M0024 |            | 0.83654 |      |     |                     |                          |
| 8     | V\$OCT1_07 | 9       | 2468 | (+) | TNTATGNTAATT        | TGTAATTTAATT             |
| M0016 |            | 0.83945 |      |     |                     |                          |
| 2     | V\$OCT1_06 | 3       | 2469 | (+) | CWNAWTKWSATRYN      | GTAATTTAATTATT           |
| M0016 |            | 0.84257 |      |     |                     |                          |
| 2     | V\$OCT1_06 | 8       | 2469 | (-) | CWNAWTKWSATRYN      | GTAATTTAATTATT           |
| M0013 |            | 0.81221 |      |     | NNNNNNNWATGCAAATNNN |                          |
| 8     | V\$OCT1_04 | 2       | 2471 | (-) | WNNW                | AATTTAATTATTTATAAAAAAATT |
| M0013 |            | 0.88344 |      |     |                     |                          |
| 7     | V\$OCT1_03 | 5       | 2472 | (-) | NNNRATATNANNN       | ATTTAATTATTTA            |
| M0013 |            | 0.83354 |      |     | NNNNNNNWATGCAAATNNN |                          |
| 8     | V\$OCT1_04 | 2       | 2472 | (+) | WNNW                | ATTTAATTATTTATAAAAAAATTG |
| M0013 |            | 0.78293 |      |     | NNNNNNNWATGCAAATNNN |                          |
| 8     | V\$OCT1_04 | 6       | 2473 | (-) | WNNW                | TTTAATTATTTATAAAAAAATTGT |
| M0013 |            | 0.78565 |      |     | NNNNNNNWATGCAAATNNN |                          |
| 8     | V\$OCT1_04 | 5       | 2475 | (-) | WNNW                | TAATTATTTATAAAAAAATTGTGT |
| M0013 |            | 0.73464 |      |     |                     |                          |
| 5     | V\$OCT1_01 | 3       | 2478 | (+) | NNNNWTATGCAAATNTNNN | TTATTTATAAAAAAATTGTG     |
| M0016 |            | 0.80429 |      |     |                     |                          |
| 2     | V\$OCT1_06 | 7       | 2483 | (-) | CWNAWTKWSATRYN      | TATAAAAAAATTGTG          |

|       |            |         |      |     |                     |                         |
|-------|------------|---------|------|-----|---------------------|-------------------------|
| M0016 |            | 0.80312 |      |     |                     |                         |
| 2     | V\$OCT1_06 | 5       | 2496 | (+) | CWNAWTKWSATRYN      | GTCTATGACTTTCC          |
| M0013 |            | 0.85065 |      |     |                     |                         |
| 7     | V\$OCT1_03 | 2       | 2507 | (-) | NNNRTAATNANNN       | TCCTTATTAATGG           |
| M0016 |            | 0.84726 |      |     |                     |                         |
| 2     | V\$OCT1_06 | 6       | 2512 | (+) | CWNAWTKWSATRYN      | ATTAATGGCCTACT          |
| M0013 |            | 0.78502 |      |     | NNNNNNNWATGCAAATNNN |                         |
| 8     | V\$OCT1_04 | 7       | 2536 | (-) | WNNW                | TGGTACATGTTAAATGAATATAT |
| M0024 |            | 0.83633 |      |     |                     |                         |
| 8     | V\$OCT1_07 | 7       | 2539 | (+) | TNTATGNTAATT        | TACATGTTAAAT            |
| M0013 |            | 0.79820 |      |     | NNNNNNNWATGCAAATNNN |                         |
| 8     | V\$OCT1_04 | 2       | 2541 | (+) | WNNW                | CATGTTAAATGAATATATGATTA |
| M0016 |            | 0.80039 |      |     |                     |                         |
| 2     | V\$OCT1_06 | 1       | 2541 | (-) | CWNAWTKWSATRYN      | CATGTTAAATGAAT          |
| M0016 |            | 0.82656 |      |     |                     |                         |
| 2     | V\$OCT1_06 | 2       | 2544 | (+) | CWNAWTKWSATRYN      | GTAAATGAATATA           |
| M0013 |            | 0.81158 |      |     |                     |                         |
| 6     | V\$OCT1_02 | 6       | 2546 | (-) | NNGAATATKCANNNN     | TAAATGAATATATGA         |
| M0016 |            | 0.87343 |      |     |                     |                         |
| 2     | V\$OCT1_06 | 7       | 2546 | (-) | CWNAWTKWSATRYN      | TAAATGAATATATG          |
| M0013 |            | 0.78251 |      |     | NNNNNNNWATGCAAATNNN |                         |
| 8     | V\$OCT1_04 | 8       | 2549 | (+) | WNNW                | ATGAATATATGATTAACCTTGTA |
| M0016 |            | 0.80429 |      |     |                     |                         |
| 2     | V\$OCT1_06 | 7       | 2552 | (-) | CWNAWTKWSATRYN      | AATATATGATTAAC          |
| M0013 |            | 0.78565 |      |     | NNNNNNNWATGCAAATNNN |                         |
| 8     | V\$OCT1_04 | 5       | 2553 | (-) | WNNW                | ATATATGATTAACCTTGTAATGA |
| M0013 |            | 0.87001 |      |     |                     |                         |
| 7     | V\$OCT1_03 | 2       | 2555 | (-) | NNNRTAATNANNN       | ATATGATTAACCT           |
| M0016 |            | 0.82148 |      |     |                     |                         |
| 2     | V\$OCT1_06 | 4       | 2563 | (+) | CWNAWTKWSATRYN      | AACCTTGTAATGAT          |
| M0013 |            | 0.92532 |      |     |                     |                         |
| 7     | V\$OCT1_03 | 6       | 2566 | (+) | NNNRTAATNANNN       | CTTGTAATGATAC           |
| M0016 |            | 0.86850 |      |     |                     |                         |
| 1     | V\$OCT1_05 | 4       | 2575 | (+) | MKNATTTGCATAYY      | ATACTTTTAATATT          |
| M0016 |            | 0.89570 |      |     |                     |                         |
| 2     | V\$OCT1_06 | 3       | 2575 | (+) | CWNAWTKWSATRYN      | ATACTTTTAATATT          |
| M0016 |            | 0.81328 |      |     |                     |                         |
| 2     | V\$OCT1_06 | 1       | 2588 | (-) | CWNAWTKWSATRYN      | TATAGCCAAAAATC          |
| M0016 |            | 0.85546 |      |     |                     |                         |
| 2     | V\$OCT1_06 | 9       | 2595 | (+) | CWNAWTKWSATRYN      | AAAAATCAAATTCA          |
| M0016 |            | 0.91679 |      |     |                     |                         |
| 2     | V\$OCT1_06 | 7       | 2596 | (-) | CWNAWTKWSATRYN      | AAAATCAAATTCAT          |
| M0013 |            | 0.81916 |      |     |                     |                         |
| 6     | V\$OCT1_02 | 6       | 2598 | (+) | NNGAATATKCANNNN     | AATCAAATTCATACA         |
| M0016 |            | 0.84726 |      |     |                     |                         |
| 2     | V\$OCT1_06 | 6       | 2599 | (+) | CWNAWTKWSATRYN      | ATCAAATTCATACA          |
| M0013 |            | 0.86527 |      |     |                     |                         |
| 7     | V\$OCT1_03 | 1       | 2609 | (-) | NNNRTAATNANNN       | TACACATTATACT           |
| M0013 |            | 0.84044 |      |     | NNNNNNNWATGCAAATNNN |                         |
| 8     | V\$OCT1_04 | 3       | 2632 | (-) | WNNW                | TCTAAAGTTTTTAATAAAATAAA |
| M0016 |            | 0.81367 |      |     |                     |                         |
| 2     | V\$OCT1_06 | 2       | 2636 | (+) | CWNAWTKWSATRYN      | AAGTTTTTAATAAA          |
| M0013 |            | 0.84867 |      |     |                     |                         |
| 7     | V\$OCT1_03 | 6       | 2639 | (+) | NNNRTAATNANNN       | TTTTTAATAAAAT           |
| M0016 |            | 0.83437 |      |     |                     |                         |
| 2     | V\$OCT1_06 | 5       | 2645 | (+) | CWNAWTKWSATRYN      | ATAAAATAAATTTA          |
| M0016 |            | 0.82656 |      |     |                     |                         |
| 2     | V\$OCT1_06 | 2       | 2646 | (-) | CWNAWTKWSATRYN      | TAAAATAAATTTAC          |
| M0013 |            | 0.78732 |      |     | NNNNNNNWATGCAAATNNN |                         |
| 8     | V\$OCT1_04 | 7       | 2733 | (-) | WNNW                | TCCTAAATTATTAGTAATAGATC |
| M0013 |            | 0.87159 |      |     |                     |                         |
| 7     | V\$OCT1_03 | 2       | 2737 | (-) | NNNRTAATNANNN       | AAATTATTAGTAA           |
| M0016 |            | 0.86992 |      |     |                     |                         |
| 2     | V\$OCT1_06 | 2       | 2753 | (+) | CWNAWTKWSATRYN      | ATCCTTTTAATTTA          |
| M0013 |            | 0.78377 |      |     | NNNNNNNWATGCAAATNNN |                         |
| 8     | V\$OCT1_04 | 2       | 2754 | (-) | WNNW                | TCCTTTTAATTTAATTTTTTTTT |

|       |            |         |      |     |                     |                        |
|-------|------------|---------|------|-----|---------------------|------------------------|
| M0013 |            | 0.79443 |      |     | NNNNNNNWATGCAAATNNN |                        |
| 8     | V\$OCT1_04 | 7       | 2755 | (-) | WNNW                | CCTTTTAATTTAATTTTTTTT  |
| M0016 |            | 0.86054 |      |     |                     |                        |
| 2     | V\$OCT1_06 | 7       | 2758 | (+) | CWNAWTKWSATRYN      | TTTAATTTAATTTT         |
| M0024 |            | 0.83167 |      |     |                     |                        |
| 8     | V\$OCT1_07 | 3       | 2758 | (+) | TNTATGNTAATT        | TTTAATTTAATT           |
| M0016 |            | 0.85546 |      |     |                     |                        |
| 2     | V\$OCT1_06 | 9       | 2759 | (-) | CWNAWTKWSATRYN      | TTAATTTAATTTTT         |
| M0013 |            | 0.83375 |      |     | NNNNNNNWATGCAAATNNN |                        |
| 8     | V\$OCT1_04 | 2       | 2765 | (-) | WNNW                | TAATTTTTTTTAATTTTTTAAT |
| M0016 |            | 0.82656 |      |     |                     |                        |
| 2     | V\$OCT1_06 | 2       | 2769 | (+) | CWNAWTKWSATRYN      | TTTTTTTAATTTT          |
| M0024 |            | 0.83167 |      |     |                     |                        |
| 8     | V\$OCT1_07 | 3       | 2769 | (+) | TNTATGNTAATT        | TTTTTTTAATT            |
| M0013 |            | 0.85717 |      |     | NNNNNNNWATGCAAATNNN |                        |
| 8     | V\$OCT1_04 | 3       | 2773 | (-) | WNNW                | TTTAATTTTTAATTTTTATT   |
| M0016 |            | 0.89062 |      |     |                     |                        |
| 2     | V\$OCT1_06 | 5       | 2777 | (+) | CWNAWTKWSATRYN      | AATTTTTTAATTTT         |
| M0024 |            | 0.81238 |      |     |                     |                        |
| 8     | V\$OCT1_07 | 1       | 2777 | (+) | TNTATGNTAATT        | AATTTTTTAATT           |
| M0013 |            | 0.81785 |      |     | NNNNNNNWATGCAAATNNN |                        |
| 8     | V\$OCT1_04 | 9       | 2778 | (+) | WNNW                | ATTTTTTAATTTTTATTTTAGG |
| M0016 |            | 0.80039 |      |     |                     |                        |
| 2     | V\$OCT1_06 | 1       | 2778 | (+) | CWNAWTKWSATRYN      | ATTTTTTAATTTT          |
| M0013 |            | 0.83124 |      |     | NNNNNNNWATGCAAATNNN |                        |
| 8     | V\$OCT1_04 | 2       | 2779 | (-) | WNNW                | TTTTTAATTTTTATTTTAGGT  |
| M0019 |            | 0.82314 |      |     |                     |                        |
| 5     | V\$OCT1_Q6 | 4       | 2783 | (-) | NNNNATGCAAATNAN     | TTAATTTTTATTTTT        |
| M0013 |            | 0.87554 |      |     |                     |                        |
| 7     | V\$OCT1_03 | 3       | 2799 | (+) | NNNRATAATNANNN      | GGTGCAATCATGA          |
| M0016 |            | 0.86835 |      |     |                     |                        |
| 2     | V\$OCT1_06 | 9       | 2866 | (+) | CWNAWTKWSATRYN      | GTTAATTGCATCTA         |
| M0019 |            | 0.83433 |      |     |                     |                        |
| 5     | V\$OCT1_Q6 | 4       | 2866 | (-) | NNNNATGCAAATNAN     | GTTAATTGCATCTAA        |
| M0016 |            | 0.93203 |      |     |                     |                        |
| 2     | V\$OCT1_06 | 1       | 2872 | (-) | CWNAWTKWSATRYN      | TGCATCTAATGAAT         |
| M0013 |            | 0.86566 |      |     |                     |                        |
| 7     | V\$OCT1_03 | 6       | 2874 | (+) | NNNRATAATNANNN      | CATCTAATGAATT          |
| M0013 |            | 0.78289 |      |     |                     |                        |
| 6     | V\$OCT1_02 | 1       | 2877 | (-) | NNGAATATKCANNNN     | CTAATGAATTTGTAT        |
| M0013 |            | 0.83667 |      |     | NNNNNNNWATGCAAATNNN |                        |
| 8     | V\$OCT1_04 | 9       | 2877 | (-) | WNNW                | CTAATGAATTTGTATTAACCTT |
| M0013 |            | 0.73769 |      |     |                     |                        |
| 5     | V\$OCT1_01 | 6       | 2879 | (-) | NNNNWTATGCAAATNTNNN | AATGAATTTGTATTAACCTT   |
| M0013 |            | 0.77558 |      |     |                     |                        |
| 6     | V\$OCT1_02 | 2       | 2880 | (+) | NNGAATATKCANNNN     | ATGAATTTGTATTAA        |
| M0013 |            | 0.83396 |      |     | NNNNNNNWATGCAAATNNN |                        |
| 8     | V\$OCT1_04 | 1       | 2882 | (+) | WNNW                | GAATTTGTATTAACCTTTAAGA |
| M0024 |            | 0.82022 |      |     |                     |                        |
| 8     | V\$OCT1_07 | 5       | 2883 | (-) | TNTATGNTAATT        | AATTTGTATTAA           |
| M0016 |            | 0.84726 |      |     |                     |                        |
| 2     | V\$OCT1_06 | 6       | 2887 | (-) | CWNAWTKWSATRYN      | TGTATTAACCTTT          |
| M0013 |            | 0.76287 |      |     |                     |                        |
| 5     | V\$OCT1_01 | 7       | 2895 | (+) | NNNNWTATGCAAATNTNNN | AACCTTAAGAAAATTTAT     |
| M0024 |            | 0.79478 |      |     |                     |                        |
| 8     | V\$OCT1_07 | 5       | 2898 | (+) | TNTATGNTAATT        | TTTAAGAAAATT           |
| M0016 |            | 0.86835 |      |     |                     |                        |
| 2     | V\$OCT1_06 | 9       | 2903 | (+) | CWNAWTKWSATRYN      | GAAAATTTATTTA          |
| M0013 |            | 0.78084 |      |     | NNNNNNNWATGCAAATNNN |                        |
| 8     | V\$OCT1_04 | 5       | 2905 | (-) | WNNW                | AAATTTATTTAAAGGCTCTAAT |
| M0016 |            | 0.80078 |      |     |                     |                        |
| 2     | V\$OCT1_06 | 1       | 2909 | (-) | CWNAWTKWSATRYN      | TTTATTTAAAGGCT         |
| M0016 |            |         |      |     |                     |                        |
| 2     | V\$OCT1_06 | 0.825   | 2918 | (-) | CWNAWTKWSATRYN      | AGGCTCTAATTATG         |
| M0013 |            | 0.87238 |      |     |                     |                        |
| 7     | V\$OCT1_03 | 2       | 2920 | (+) | NNNRATAATNANNN      | GCTCTAATTATGT          |

|       |            |         |      |     |                      |                          |
|-------|------------|---------|------|-----|----------------------|--------------------------|
| M0013 |            | 0.90952 |      |     |                      |                          |
| 7     | V\$OCT1_03 | 2       | 2921 | (-) | NNNRTAATNANNN        | CTCTAATTATGTA            |
| M0013 |            | 0.86177 |      |     | NNNNNNNNWATGCAAATNNN |                          |
| 8     | V\$OCT1_04 | 3       | 2921 | (+) | WNNW                 | CTCTAATTATGTAAATTTCTAAA  |
| M0013 |            | 0.79360 |      |     | NNNNNNNNWATGCAAATNNN |                          |
| 8     | V\$OCT1_04 | 1       | 2922 | (-) | WNNW                 | TCTAATTATGTAAATTTCTAAAT  |
| M0013 |            | 0.92159 |      |     |                      |                          |
| 5     | V\$OCT1_01 | 5       | 2923 | (+) | NNNNWTATGCAAATNTNNN  | CTAATTATGTAAATTTCTA      |
| M0016 |            | 0.80820 |      |     |                      |                          |
| 2     | V\$OCT1_06 | 3       | 2925 | (+) | CWNAWTKWSATRYN       | AATTATGTAAATTT           |
| M0019 |            | 0.84061 |      |     |                      |                          |
| 5     | V\$OCT1_Q6 | 1       | 2925 | (+) | NNNNATGCAAATNAN      | AATTATGTAAATTTCT         |
| M0016 |            | 0.81367 |      |     |                      |                          |
| 2     | V\$OCT1_06 | 2       | 2926 | (+) | CWNAWTKWSATRYN       | ATTATGTAAATTTCT          |
| M0016 |            |         |      |     |                      |                          |
| 2     | V\$OCT1_06 | 0.88125 | 2926 | (-) | CWNAWTKWSATRYN       | ATTATGTAAATTTCT          |
| M0024 |            | 0.94509 |      |     |                      |                          |
| 8     | V\$OCT1_07 | 2       | 2926 | (+) | TNTATGNTAATT         | ATTATGTAAATT             |
| M0013 |            | 0.83751 |      |     | NNNNNNNNWATGCAAATNNN |                          |
| 8     | V\$OCT1_04 | 6       | 2930 | (-) | WNNW                 | TGTAAATTTCTAAATAGTTATAT  |
| M0013 |            | 0.78230 |      |     | NNNNNNNNWATGCAAATNNN |                          |
| 8     | V\$OCT1_04 | 9       | 2936 | (-) | WNNW                 | TTTCTAAATAGTTATATTTATAG  |
| M0013 |            | 0.83145 |      |     | NNNNNNNNWATGCAAATNNN |                          |
| 8     | V\$OCT1_04 | 1       | 2937 | (+) | WNNW                 | TTCTAAATAGTTATATTTATAGA  |
| M0013 |            | 0.78607 |      |     | NNNNNNNNWATGCAAATNNN |                          |
| 8     | V\$OCT1_04 | 3       | 2941 | (+) | WNNW                 | AAATAGTTATATTTATAGAGCAA  |
| M0013 |            | 0.78544 |      |     | NNNNNNNNWATGCAAATNNN |                          |
| 8     | V\$OCT1_04 | 5       | 2944 | (-) | WNNW                 | TAGTTATATTTATAGAGCAAAAT  |
| M0013 |            | 0.73731 |      |     |                      |                          |
| 5     | V\$OCT1_01 | 4       | 2962 | (-) | NNNNWTATGCAAATNTNNN  | AAAATAGCTGCATACTAAC      |
| M0013 |            | 0.84082 |      |     |                      |                          |
| 6     | V\$OCT1_02 | 3       | 2966 | (-) | NNGAATATKCANNNN      | TAGCTGCATACTAAC          |
| M0013 |            | 0.87348 |      |     | NNNNNNNNWATGCAAATNNN |                          |
| 8     | V\$OCT1_04 | 4       | 2977 | (-) | WNNW                 | TAACTATATTTTCATAAAAAGTAA |
| M0013 |            | 0.82678 |      |     |                      |                          |
| 5     | V\$OCT1_01 | 4       | 2979 | (-) | NNNNWTATGCAAATNTNNN  | ACTATATTTTCATAAAAAGT     |
| M0016 |            | 0.81718 |      |     |                      |                          |
| 2     | V\$OCT1_06 | 7       | 2981 | (+) | CWNAWTKWSATRYN       | TATATTTTCATAAA           |
| M0024 |            | 0.79478 |      |     |                      |                          |
| 8     | V\$OCT1_07 | 5       | 2983 | (-) | TNTATGNTAATT         | TATTTTCATAAA             |
| M0016 |            | 0.86796 |      |     |                      |                          |
| 2     | V\$OCT1_06 | 9       | 2995 | (-) | CWNAWTKWSATRYN       | AGTAACTCATTTTT           |
| M0013 |            | 0.80698 |      |     | NNNNNNNNWATGCAAATNNN |                          |
| 8     | V\$OCT1_04 | 5       | 2998 | (-) | WNNW                 | AACTCATTTTTACATTTATTTCT  |
| M0013 |            | 0.77127 |      |     |                      |                          |
| 5     | V\$OCT1_01 | 1       | 3000 | (-) | NNNNWTATGCAAATNTNNN  | CTCATTTTTACATTTATTT      |
| M0019 |            | 0.79912 |      |     |                      |                          |
| 5     | V\$OCT1_Q6 | 7       | 3000 | (-) | NNNNATGCAAATNAN      | CTCATTTTTACATTT          |
| M0013 |            | 0.84037 |      |     |                      |                          |
| 7     | V\$OCT1_03 | 9       | 3001 | (-) | NNNRTAATNANNN        | TCATTTTTACATT            |
| M0016 |            | 0.94531 |      |     |                      |                          |
| 2     | V\$OCT1_06 | 2       | 3002 | (+) | CWNAWTKWSATRYN       | CATTTTTACATTTA           |
| M0013 |            | 0.82099 |      |     | NNNNNNNNWATGCAAATNNN |                          |
| 8     | V\$OCT1_04 | 5       | 3007 | (+) | WNNW                 | TTACATTTATTTCTATTACAAAA  |
| M0013 |            |         |      |     | NNNNNNNNWATGCAAATNNN |                          |
| 8     | V\$OCT1_04 | 0.81033 | 3008 | (-) | WNNW                 | TACATTTATTTCTATTACAAAAT  |
| M0013 |            | 0.78983 |      |     | NNNNNNNNWATGCAAATNNN |                          |
| 8     | V\$OCT1_04 | 7       | 3013 | (+) | WNNW                 | TTATTTCTATTACAAAATTTAA   |
| M0013 |            | 0.85381 |      |     |                      |                          |
| 7     | V\$OCT1_03 | 3       | 3016 | (-) | NNNRTAATNANNN        | TTTCTATTACAAA            |
| M0016 |            | 0.82656 |      |     |                      |                          |
| 2     | V\$OCT1_06 | 2       | 3018 | (-) | CWNAWTKWSATRYN       | TCTATTACAAAATT           |
| M0016 |            | 0.87773 |      |     |                      |                          |
| 2     | V\$OCT1_06 | 4       | 3026 | (-) | CWNAWTKWSATRYN       | AAAATTTAAAAGAT           |
| M0016 |            | 0.82656 |      |     |                      |                          |
| 2     | V\$OCT1_06 | 2       | 3027 | (-) | CWNAWTKWSATRYN       | AAATTTAAAAGATG           |

|       |            |         |      |     |                      |                          |
|-------|------------|---------|------|-----|----------------------|--------------------------|
| M0016 |            | 0.80039 |      |     |                      |                          |
| 2     | V\$OCT1_06 | 1       | 3060 | (-) | CWNAWTKWSATRYN       | AGAATTAAGAAATC           |
| M0016 |            | 0.86835 |      |     |                      |                          |
| 2     | V\$OCT1_06 | 9       | 3075 | (+) | CWNAWTKWSATRYN       | CACTTTATCATGTA           |
| M0013 |            | 0.79820 |      |     | NNNNNNNNWATGCAAATNNN |                          |
| 8     | V\$OCT1_04 | 2       | 3076 | (+) | WNNW                 | ACTTTATCATGTATAAGAAAATC  |
| M0013 |            | 0.80761 |      |     | NNNNNNNNWATGCAAATNNN |                          |
| 8     | V\$OCT1_04 | 2       | 3082 | (+) | WNNW                 | TCATGTATAAGAAAATCTTTAAA  |
| M0013 |            | 0.75944 |      |     |                      |                          |
| 5     | V\$OCT1_01 | 3       | 3084 | (+) | NNNNWTATGCAAATNTNNN  | ATGTATAAGAAAATCTTTA      |
| M0016 |            | 0.84726 |      |     |                      |                          |
| 2     | V\$OCT1_06 | 6       | 3087 | (-) | CWNAWTKWSATRYN       | TATAAGAAAATCTT           |
| M0016 |            | 0.80039 |      |     |                      |                          |
| 2     | V\$OCT1_06 | 1       | 3094 | (+) | CWNAWTKWSATRYN       | AAATCTTTAAAATT           |
| M0016 |            | 0.82109 |      |     |                      |                          |
| 2     | V\$OCT1_06 | 4       | 3095 | (-) | CWNAWTKWSATRYN       | AATCTTTAAAATTC           |
| M0016 |            | 0.80078 |      |     |                      |                          |
| 2     | V\$OCT1_06 | 1       | 3096 | (+) | CWNAWTKWSATRYN       | ATCTTTAAAATTCT           |
| M0013 |            | 0.77910 |      |     |                      |                          |
| 6     | V\$OCT1_02 | 1       | 3099 | (+) | NNGAATATKCANNNN      | TTTAAAATTCTCATA          |
| M0013 |            | 0.76554 |      |     |                      |                          |
| 5     | V\$OCT1_01 | 8       | 3100 | (-) | NNNNWTATGCAAATNTNNN  | TTAAAATTCTCATATGATA      |
| M0016 |            | 0.86054 |      |     |                      |                          |
| 2     | V\$OCT1_06 | 7       | 3102 | (+) | CWNAWTKWSATRYN       | AAAATTCTCATATG           |
| M0016 |            | 0.81210 |      |     |                      |                          |
| 2     | V\$OCT1_06 | 9       | 3122 | (-) | CWNAWTKWSATRYN       | AAAATATATTTTIG           |
| M0013 |            | 0.79192 |      |     | NNNNNNNNWATGCAAATNNN |                          |
| 8     | V\$OCT1_04 | 8       | 3151 | (+) | WNNW                 | GAAGATATTTTTTAATTATAATA  |
| M0013 |            | 0.84525 |      |     | NNNNNNNNWATGCAAATNNN |                          |
| 8     | V\$OCT1_04 | 3       | 3152 | (-) | WNNW                 | AAGATATTTTTTAATTATAATAT  |
| M0024 |            | 0.83167 |      |     |                      |                          |
| 8     | V\$OCT1_07 | 3       | 3156 | (+) | TNTATGNTAATT         | TATTTTTTAATT             |
| M0016 |            | 0.81328 |      |     |                      |                          |
| 2     | V\$OCT1_06 | 1       | 3157 | (+) | CWNAWTKWSATRYN       | ATTTTTTAATTATA           |
| M0013 |            | 0.83793 |      |     | NNNNNNNNWATGCAAATNNN |                          |
| 8     | V\$OCT1_04 | 4       | 3158 | (-) | WNNW                 | TTTTTTAATTATAATATGCTCTA  |
| M0013 |            | 0.86527 |      |     |                      |                          |
| 7     | V\$OCT1_03 | 1       | 3159 | (+) | NNNRTAATNANNN        | TTTTTAATTATAA            |
| M0013 |            | 0.88858 |      |     |                      |                          |
| 7     | V\$OCT1_03 | 2       | 3160 | (-) | NNNRTAATNANNN        | TTTTAATTATAAT            |
| M0024 |            | 0.81322 |      |     |                      |                          |
| 8     | V\$OCT1_07 | 9       | 3164 | (-) | TNTATGNTAATT         | AATTATAATATG             |
| M0013 |            | 0.84542 |      |     |                      |                          |
| 6     | V\$OCT1_02 | 5       | 3167 | (+) | NNGAATATKCANNNN      | TATAATATGCTCTAA          |
| M0013 |            | 0.79339 |      |     | NNNNNNNNWATGCAAATNNN |                          |
| 8     | V\$OCT1_04 | 2       | 3180 | (+) | WNNW                 | AAAAAATAATTCACAAAAAATAA  |
| M0013 |            | 0.78532 |      |     |                      |                          |
| 6     | V\$OCT1_02 | 8       | 3182 | (+) | NNGAATATKCANNNN      | AAAATAATTCACAAA          |
| M0024 |            | 0.79817 |      |     |                      |                          |
| 8     | V\$OCT1_07 | 7       | 3187 | (-) | TNTATGNTAATT         | AATTCACAAAAA             |
| M0016 |            | 0.86289 |      |     |                      |                          |
| 2     | V\$OCT1_06 | 1       | 3194 | (+) | CWNAWTKWSATRYN       | AAAAAATAAATGCA           |
| M0013 |            | 0.84274 |      |     | NNNNNNNNWATGCAAATNNN |                          |
| 8     | V\$OCT1_04 | 4       | 3195 | (+) | WNNW                 | AAAAAATAAATGCAAAAATCATAG |
| M0013 |            | 0.82907 |      |     |                      |                          |
| 5     | V\$OCT1_01 | 3       | 3197 | (+) | NNNNWTATGCAAATNTNNN  | AAATAAATGCAAAAATCAT      |
| M0013 |            | 0.77964 |      |     |                      |                          |
| 6     | V\$OCT1_02 | 3       | 3197 | (+) | NNGAATATKCANNNN      | AAATAAATGCAAAAAA         |
| M0019 |            |         |      |     |                      |                          |
| 5     | V\$OCT1_Q6 | 0.82369 | 3199 | (+) | NNNNATGCAAATNAN      | ATAAATGCAAAAATC          |
| M0016 |            | 0.89843 |      |     |                      |                          |
| 2     | V\$OCT1_06 | 7       | 3200 | (-) | CWNAWTKWSATRYN       | TAAATGCAAAAATC           |
| M0013 |            | 0.78126 |      |     | NNNNNNNNWATGCAAATNNN |                          |
| 8     | V\$OCT1_04 | 3       | 3225 | (+) | WNNW                 | TCAGAAATGTTTTAAATTAAATT  |
| M0013 |            | 0.79694 |      |     | NNNNNNNNWATGCAAATNNN |                          |
| 8     | V\$OCT1_04 | 7       | 3227 | (-) | WNNW                 | AGAAATGTTTTAAATTAAATTCC  |

|       |            |         |      |     |                      |                         |
|-------|------------|---------|------|-----|----------------------|-------------------------|
| M0016 |            | 0.80078 |      |     |                      |                         |
| 2     | V\$OCT1_06 | 1       | 3231 | (+) | CWNAWTKWSATRYN       | ATGTTTTAAATTAA          |
| M0013 |            | 0.78105 |      |     | NNNNNNNWWATGCAAATNNN |                         |
| 8     | V\$OCT1_04 | 4       | 3232 | (-) | WNNW                 | TGTTTTAAATTAAATTCCTATCT |
| M0016 |            | 0.85546 |      |     |                      |                         |
| 2     | V\$OCT1_06 | 9       | 3236 | (+) | CWNAWTKWSATRYN       | TTAAATTAAATTCC          |
| M0016 |            | 0.89101 |      |     |                      |                         |
| 2     | V\$OCT1_06 | 6       | 3237 | (-) | CWNAWTKWSATRYN       | TAAATTAAATTCCT          |
| M0016 |            | 0.80078 |      |     |                      |                         |
| 2     | V\$OCT1_06 | 1       | 3242 | (-) | CWNAWTKWSATRYN       | TAAATTCCTATCTC          |
| M0016 |            | 0.80703 |      |     |                      |                         |
| 2     | V\$OCT1_06 | 1       | 3371 | (-) | CWNAWTKWSATRYN       | TACATTTTATTGTA          |
| M0013 |            | 0.75104 |      |     |                      |                         |
| 5     | V\$OCT1_01 | 9       | 3429 | (+) | NNNNWTATGCAAATNTNNN  | GTCCATAATCAAATCTAAT     |
| M0013 |            | 0.91465 |      |     |                      |                         |
| 7     | V\$OCT1_03 | 8       | 3430 | (+) | NNNRATAATNANNN       | TCCATAATCAAAT           |
| M0016 |            | 0.82539 |      |     |                      |                         |
| 2     | V\$OCT1_06 | 1       | 3432 | (+) | CWNAWTKWSATRYN       | CATAATCAAATCTA          |
| M0016 |            | 0.93242 |      |     |                      |                         |
| 2     | V\$OCT1_06 | 2       | 3438 | (-) | CWNAWTKWSATRYN       | CAAATCTAATTTTC          |
| M0013 |            |         |      |     | NNNNNNNWWATGCAAATNNN |                         |
| 8     | V\$OCT1_04 | 0.78921 | 3439 | (-) | WNNW                 | AAATCTAATTTTCAGGCATTTT  |
| M0016 |            | 0.88632 |      |     |                      |                         |
| 2     | V\$OCT1_06 | 8       | 3443 | (+) | CWNAWTKWSATRYN       | CTAATTTTCAGGCA          |
| M0019 |            | 0.82532 |      |     |                      |                         |
| 5     | V\$OCT1_Q6 | 8       | 3443 | (-) | NNNNATGCAAATNAN      | CTAATTTTCAGGCAT         |
| M0013 |            | 0.79101 |      |     |                      |                         |
| 6     | V\$OCT1_02 | 2       | 3449 | (-) | NNGAATATKCANNNN      | TTCAGGCATTTTTTT         |
| M0013 |            | 0.73349 |      |     |                      |                         |
| 5     | V\$OCT1_01 | 9       | 3462 | (-) | NNNNWTATGCAAATNTNNN  | TTAAAAGTTACATTCTGTG     |
| M0016 |            | 0.87617 |      |     |                      |                         |
| 2     | V\$OCT1_06 | 2       | 3464 | (+) | CWNAWTKWSATRYN       | AAAAGTTACATTCT          |
| M0016 |            | 0.84765 |      |     |                      |                         |
| 2     | V\$OCT1_06 | 6       | 3465 | (-) | CWNAWTKWSATRYN       | AAAGTTACATTCTG          |
| M0024 |            | 0.79796 |      |     |                      |                         |
| 8     | V\$OCT1_07 | 5       | 3466 | (-) | TNTATGNTAATT         | AAGTTACATTCT            |
| M0016 |            | 0.82656 |      |     |                      |                         |
| 2     | V\$OCT1_06 | 2       | 3479 | (-) | CWNAWTKWSATRYN       | TGTATTAAAGCTAT          |
| M0013 |            | 0.82434 |      |     | NNNNNNNWWATGCAAATNNN |                         |
| 8     | V\$OCT1_04 | 1       | 3518 | (+) | WNNW                 | ATTTTTTCTTTTAATTTTAGA   |
| M0016 |            | 0.81328 |      |     |                      |                         |
| 2     | V\$OCT1_06 | 1       | 3518 | (+) | CWNAWTKWSATRYN       | ATTTTTTCTTTTA           |
| M0013 |            | 0.80050 |      |     | NNNNNNNWWATGCAAATNNN |                         |
| 8     | V\$OCT1_04 | 2       | 3519 | (-) | WNNW                 | TTTTTTCTTTTAATTTTAGAC   |
| M0016 |            | 0.82656 |      |     |                      |                         |
| 2     | V\$OCT1_06 | 2       | 3523 | (+) | CWNAWTKWSATRYN       | TTCTTTTAATTTT           |
| M0024 |            | 0.83167 |      |     |                      |                         |
| 8     | V\$OCT1_07 | 3       | 3523 | (+) | TNTATGNTAATT         | TTCTTTTAATT             |
| M0013 |            | 0.83730 |      |     | NNNNNNNWWATGCAAATNNN |                         |
| 8     | V\$OCT1_04 | 7       | 3525 | (-) | WNNW                 | TCTTTTAATTTTAGACTTGTTT  |
| M0016 |            | 0.80820 |      |     |                      |                         |
| 2     | V\$OCT1_06 | 3       | 3531 | (+) | CWNAWTKWSATRYN       | AATTTTLAGACTTG          |
| M0013 |            | 0.81137 |      |     | NNNNNNNWWATGCAAATNNN |                         |
| 8     | V\$OCT1_04 | 6       | 3537 | (-) | WNNW                 | TAGACTTGTTTTCATGTGCATTT |
| M0019 |            | 0.81986 |      |     |                      |                         |
| 5     | V\$OCT1_Q6 | 9       | 3541 | (-) | NNNNATGCAAATNAN      | CTTGTTTTCATGTGC         |
| M0013 |            | 0.80217 |      |     | NNNNNNNWWATGCAAATNNN |                         |
| 8     | V\$OCT1_04 | 5       | 3543 | (-) | WNNW                 | TGTTTTCATGTGCATTTTGGCTA |
| M0013 |            | 0.85499 |      |     |                      |                         |
| 7     | V\$OCT1_03 | 8       | 3545 | (-) | NNNRATAATNANNN       | TTTTCATTGTCAT           |
| M0016 |            | 0.86054 |      |     |                      |                         |
| 2     | V\$OCT1_06 | 7       | 3547 | (+) | CWNAWTKWSATRYN       | TTCATTGTCAATTTT         |
| M0016 |            | 0.81210 |      |     |                      |                         |
| 2     | V\$OCT1_06 | 9       | 3548 | (-) | CWNAWTKWSATRYN       | TCATTGTCAATTTTG         |
| M0016 |            | 0.83437 |      |     |                      |                         |
| 2     | V\$OCT1_06 | 5       | 3571 | (+) | CWNAWTKWSATRYN       | CTGCTTTACTTTCA          |



|       |            |         |      |     |                     |                         |
|-------|------------|---------|------|-----|---------------------|-------------------------|
| M0019 |            | 0.83296 |      |     |                     |                         |
| 5     | V\$OCT1_Q6 | 9       | 3571 | (-) | NNNNATGCAAATNAN     | CTGCTTTACTTTCAC         |
| M0013 |            | 0.81323 |      |     |                     |                         |
| 5     | V\$OCT1_01 | 9       | 3606 | (-) | NNNNWTATGCAAATNTNNN | CACCTATTTGCAAACAGCA     |
| M0013 |            | 0.73426 |      |     |                     |                         |
| 5     | V\$OCT1_01 | 2       | 3607 | (+) | NNNNWTATGCAAATNTNNN | ACTTATTTGCAAACAGCAA     |
| M0016 |            | 0.86562 |      |     |                     |                         |
| 2     | V\$OCT1_06 | 5       | 3608 | (+) | CWNAWTKWSATRYN      | CTTATTTGCAAACA          |
| M0019 |            | 0.89110 |      |     |                     |                         |
| 5     | V\$OCT1_Q6 | 3       | 3608 | (-) | NNNNATGCAAATNAN     | CTTATTTGCAAACAG         |
| M0016 |            | 0.82890 |      |     |                     |                         |
| 2     | V\$OCT1_06 | 6       | 3667 | (-) | CWNAWTKWSATRYN      | AGACTGTAAAATTT          |
| M0013 |            | 0.77937 |      |     |                     |                         |
| 6     | V\$OCT1_02 | 2       | 3701 | (+) | NNGAATATKCANNNN     | TTCATAATTCACCTTA        |
| M0013 |            | 0.80363 |      |     | NNNNNNNWATGCAAATNNN |                         |
| 8     | V\$OCT1_04 | 9       | 3707 | (+) | WNNW                | ATCACTTATTATTAATTTAGA   |
| M0013 |            | 0.88779 |      |     |                     |                         |
| 7     | V\$OCT1_03 | 1       | 3710 | (-) | NNNRATNANNN         | CACCTATTATTA            |
| M0016 |            |         |      |     |                     |                         |
| 2     | V\$OCT1_06 | 0.85    | 3714 | (+) | CWNAWTKWSATRYN      | TATTATTAATTTA           |
| M0016 |            | 0.87890 |      |     |                     |                         |
| 2     | V\$OCT1_06 | 6       | 3715 | (-) | CWNAWTKWSATRYN      | ATTATTAATTTAG           |
| M0016 |            | 0.86054 |      |     |                     |                         |
| 2     | V\$OCT1_06 | 7       | 3732 | (-) | CWNAWTKWSATRYN      | TGCTTTTAAGTTAG          |
| M0016 |            | 0.83398 |      |     |                     |                         |
| 2     | V\$OCT1_06 | 4       | 3744 | (-) | CWNAWTKWSATRYN      | AGTATCTCCTAAAT          |
| M0013 |            | 0.81639 |      |     | NNNNNNNWATGCAAATNNN |                         |
| 8     | V\$OCT1_04 | 5       | 3759 | (+) | WNNW                | ATTCTATGAGGTAAATTAGTGGA |
| M0016 |            | 0.82109 |      |     |                     |                         |
| 2     | V\$OCT1_06 | 4       | 3786 | (-) | CWNAWTKWSATRYN      | AACTTTTAAAAAAT          |
| M0013 |            | 0.80656 |      |     | NNNNNNNWATGCAAATNNN |                         |
| 8     | V\$OCT1_04 | 6       | 3792 | (-) | WNNW                | TAAAAAATTTGAACGACTATGA  |
| M0016 |            | 0.91406 |      |     |                     |                         |
| 2     | V\$OCT1_06 | 2       | 3807 | (+) | CWNAWTKWSATRYN      | GACTATGACATTCA          |
| M0016 |            | 0.86054 |      |     |                     |                         |
| 2     | V\$OCT1_06 | 7       | 3808 | (-) | CWNAWTKWSATRYN      | ACTATGACATTCAC          |
| M0013 |            | 0.73120 |      |     |                     |                         |
| 5     | V\$OCT1_01 | 9       | 3811 | (-) | NNNNWTATGCAAATNTNNN | ATGACATTCACATTTATTT     |
| M0016 |            | 0.85546 |      |     |                     |                         |
| 2     | V\$OCT1_06 | 9       | 3813 | (+) | CWNAWTKWSATRYN      | GACATTCACATTTA          |
| M0019 |            | 0.79721 |      |     |                     |                         |
| 5     | V\$OCT1_Q6 | 6       | 3813 | (-) | NNNNATGCAAATNAN     | GACATTCACATTTAT         |
| M0016 |            | 0.82929 |      |     |                     |                         |
| 2     | V\$OCT1_06 | 7       | 3819 | (-) | CWNAWTKWSATRYN      | CACATTTATTTCT           |
| M0013 |            | 0.79548 |      |     | NNNNNNNWATGCAAATNNN |                         |
| 8     | V\$OCT1_04 | 3       | 3823 | (-) | WNNW                | TTTATTTCTTTCATTTATTCTT  |
| M0016 |            | 0.83437 |      |     |                     |                         |
| 2     | V\$OCT1_06 | 5       | 3827 | (+) | CWNAWTKWSATRYN      | TTTTCTTTCATTTA          |
| M0016 |            | 0.80859 |      |     |                     |                         |
| 2     | V\$OCT1_06 | 4       | 3841 | (+) | CWNAWTKWSATRYN      | TTCTTTGAAATTTG          |
| M0016 |            | 0.86054 |      |     |                     |                         |
| 2     | V\$OCT1_06 | 7       | 3846 | (+) | CWNAWTKWSATRYN      | TGAAATTTGATTTT          |
| M0016 |            | 0.81367 |      |     |                     |                         |
| 2     | V\$OCT1_06 | 2       | 3847 | (+) | CWNAWTKWSATRYN      | GAAATTTGATTTTA          |
| M0016 |            | 0.84218 |      |     |                     |                         |
| 2     | V\$OCT1_06 | 7       | 3941 | (+) | CWNAWTKWSATRYN      | CTGCCTGACCTGCA          |
| M0016 |            | 0.86562 |      |     |                     |                         |
| 2     | V\$OCT1_06 | 5       | 3962 | (+) | CWNAWTKWSATRYN      | CTTACTGAGTTACT          |
| M0016 |            | 0.90898 |      |     |                     |                         |
| 2     | V\$OCT1_06 | 4       | 4047 | (-) | CWNAWTKWSATRYN      | TAAATCAAAGGAAG          |
| M0016 |            | 0.86054 |      |     |                     |                         |
| 2     | V\$OCT1_06 | 7       | 4059 | (-) | CWNAWTKWSATRYN      | AGAATCAAAGTTTA          |
| M0016 |            | 0.80039 |      |     |                     |                         |
| 2     | V\$OCT1_06 | 1       | 4067 | (+) | CWNAWTKWSATRYN      | AGTTTATAGATTTT          |
| M0013 |            |         |      |     | NNNNNNNWATGCAAATNNN |                         |
| 8     | V\$OCT1_04 | 0.79632 | 4073 | (-) | WNNW                | TAGATTTTTTACCATTCAATCTT |

|       |            |         |      |     |                     |                         |
|-------|------------|---------|------|-----|---------------------|-------------------------|
| M0013 |            | 0.82434 |      |     | NNNNNNNWATGCAAATNNN |                         |
| 8     | V\$OCT1_04 | 1       | 4087 | (-) | WNNW                | TTCAATCTTATGAATGATCAAAA |
| M0013 |            | 0.78377 |      |     | NNNNNNNWATGCAAATNNN |                         |
| 8     | V\$OCT1_04 | 2       | 4088 | (+) | WNNW                | TCAATCTTATGAATGATCAAAAT |
| M0013 |            | 0.78505 |      |     |                     |                         |
| 6     | V\$OCT1_02 | 7       | 4093 | (-) | NNGAATATKCANNNN     | CTTATGAATGATCAA         |
| M0013 |            |         |      |     | NNNNNNNWATGCAAATNNN |                         |
| 8     | V\$OCT1_04 | 0.7821  | 4095 | (+) | WNNW                | TATGAATGATCAAAATGATACAA |
| M0013 |            | 0.85487 |      |     | NNNNNNNWATGCAAATNNN |                         |
| 8     | V\$OCT1_04 | 2       | 4104 | (+) | WNNW                | TCAAAATGATACAAATTGAAAAA |
| M0013 |            | 0.74933 |      |     |                     |                         |
| 5     | V\$OCT1_01 | 2       | 4106 | (+) | NNNNWTATGCAAATNTNNN | AAAATGATACAAATTGAAA     |
| M0016 |            | 0.84218 |      |     |                     |                         |
| 2     | V\$OCT1_06 | 7       | 4121 | (+) | CWNAWTKWSATRYN      | GAAAAAGTAATGTG          |
| M0013 |            | 0.86566 |      |     |                     |                         |
| 7     | V\$OCT1_03 | 6       | 4124 | (+) | NNNRATAATNANNN      | AAAGTAATGTGAA           |
| M0016 |            | 0.83945 |      |     |                     |                         |
| 2     | V\$OCT1_06 | 3       | 4126 | (+) | CWNAWTKWSATRYN      | AGTAATGTGAAACA          |
| M0013 |            |         |      |     |                     |                         |
| 6     | V\$OCT1_02 | 0.85896 | 4166 | (+) | NNGAATATKCANNNN     | AACTATATTCAATAT         |
| M0016 |            | 0.84765 |      |     |                     |                         |
| 2     | V\$OCT1_06 | 6       | 4168 | (+) | CWNAWTKWSATRYN      | CTATATTCAATATC          |
| M0016 |            | 0.87773 |      |     |                     |                         |
| 2     | V\$OCT1_06 | 4       | 4169 | (-) | CWNAWTKWSATRYN      | TATATTCAATATCT          |
| M0013 |            | 0.78377 |      |     | NNNNNNNWATGCAAATNNN |                         |
| 8     | V\$OCT1_04 | 2       | 4189 | (+) | WNNW                | AACCTATAATGAAAAAGAATATG |
| M0013 |            | 0.90201 |      |     |                     |                         |
| 7     | V\$OCT1_03 | 5       | 4191 | (+) | NNNRATAATNANNN      | CCTATAATGAAAA           |
| M0013 |            | 0.80725 |      |     |                     |                         |
| 6     | V\$OCT1_02 | 5       | 4200 | (-) | NNGAATATKCANNNN     | AAAAAGAATATGAAA         |
| M0013 |            | 0.78293 |      |     | NNNNNNNWATGCAAATNNN |                         |
| 8     | V\$OCT1_04 | 6       | 4200 | (-) | WNNW                | AAAAAGAATATGAAAACGAATAC |
| M0013 |            | 0.84755 |      |     | NNNNNNNWATGCAAATNNN |                         |
| 8     | V\$OCT1_04 | 3       | 4201 | (+) | WNNW                | AAAAGAATATGAAAACGAATACA |
| M0013 |            | 0.83784 |      |     |                     |                         |
| 6     | V\$OCT1_02 | 5       | 4203 | (+) | NNGAATATKCANNNN     | AAGAATATGAAAACG         |
| M0013 |            | 0.85319 |      |     | NNNNNNNWATGCAAATNNN |                         |
| 8     | V\$OCT1_04 | 9       | 4215 | (+) | WNNW                | ACGAATACATGTATATATATGCA |
| M0016 |            | 0.81953 |      |     |                     |                         |
| 2     | V\$OCT1_06 | 1       | 4220 | (-) | CWNAWTKWSATRYN      | TACATGTATATATA          |
| M0013 |            | 0.88937 |      |     | NNNNNNNWATGCAAATNNN |                         |
| 8     | V\$OCT1_04 | 7       | 4224 | (-) | WNNW                | TGTATATATATGCATGACTGAAA |
| M0013 |            | 0.76802 |      |     |                     |                         |
| 5     | V\$OCT1_01 | 7       | 4226 | (-) | NNNNWTATGCAAATNTNNN | TATATATATGCATGACTGA     |
| M0013 |            | 0.74112 |      |     |                     |                         |
| 5     | V\$OCT1_01 | 9       | 4227 | (+) | NNNNWTATGCAAATNTNNN | ATATATATGCATGACTGAA     |
| M0013 |            | 0.84542 |      |     |                     |                         |
| 6     | V\$OCT1_02 | 5       | 4227 | (+) | NNGAATATKCANNNN     | ATATATATGCATGAC         |
| M0016 |            | 0.82148 |      |     |                     |                         |
| 2     | V\$OCT1_06 | 4       | 4230 | (-) | CWNAWTKWSATRYN      | TATATGCATGACTG          |
| M0016 |            | 0.82109 |      |     |                     |                         |
| 2     | V\$OCT1_06 | 4       | 4234 | (-) | CWNAWTKWSATRYN      | TGCATGACTGAAAC          |
| M0016 |            | 0.81367 |      |     |                     |                         |
| 2     | V\$OCT1_06 | 2       | 4237 | (+) | CWNAWTKWSATRYN      | ATGACTGAAACATT          |
| M0013 |            | 0.84788 |      |     |                     |                         |
| 7     | V\$OCT1_03 | 6       | 4243 | (-) | NNNRATAATNANNN      | GAAACATTATGCT           |
| M0013 |            | 0.78316 |      |     |                     |                         |
| 6     | V\$OCT1_02 | 2       | 4245 | (+) | NNGAATATKCANNNN     | AACATTATGCTGTAC         |
| M0016 |            | 0.81914 |      |     |                     |                         |
| 2     | V\$OCT1_06 | 1       | 4286 | (+) | CWNAWTKWSATRYN      | CTGACTGTATTTC           |
| M0013 |            | 0.82601 |      |     | NNNNNNNWATGCAAATNNN |                         |
| 8     | V\$OCT1_04 | 4       | 4287 | (-) | WNNW                | TGACTGTATTTC            |
| M0016 |            | 0.83437 |      |     |                     |                         |
| 2     | V\$OCT1_06 | 5       | 4290 | (+) | CWNAWTKWSATRYN      | CTGTATTTC               |
| M0016 |            |         |      |     |                     |                         |
| 2     | V\$OCT1_06 | 0.88125 | 4291 | (-) | CWNAWTKWSATRYN      | TGTATTTC                |

|       |            |         |      |     |                      |                         |
|-------|------------|---------|------|-----|----------------------|-------------------------|
| M0024 |            | 0.84227 |      |     |                      |                         |
| 8     | V\$OCT1_07 | 3       | 4291 | (+) | TNTATGNTAATT         | TGTATTTCAATT            |
| M0013 |            |         |      |     | NNNNNNNWWATGCAAATNNN |                         |
| 8     | V\$OCT1_04 | 0.82706 | 4292 | (+) | WNNW                 | GTATTTCAATTTAAAAAAGAAA  |
| M0013 |            | 0.78398 |      |     | NNNNNNNWWATGCAAATNNN |                         |
| 8     | V\$OCT1_04 | 2       | 4293 | (-) | WNNW                 | TATTTCAATTTAAAAAAGAAAA  |
| M0016 |            | 0.80585 |      |     |                      |                         |
| 2     | V\$OCT1_06 | 9       | 4298 | (-) | CWNAWTKWSATRYN       | CAATTTAAAAAAG           |
| M0024 |            | 0.80771 |      |     |                      |                         |
| 8     | V\$OCT1_07 | 7       | 4299 | (-) | TNTATGNTAATT         | AATTTAAAAAAG            |
| M0016 |            | 0.83945 |      |     |                      |                         |
| 2     | V\$OCT1_06 | 3       | 4306 | (-) | CWNAWTKWSATRYN       | AAAAAGAAAAAAG           |
| M0016 |            | 0.82109 |      |     |                      |                         |
| 2     | V\$OCT1_06 | 4       | 4314 | (-) | CWNAWTKWSATRYN       | AAAAAGAAATAAAT          |
| M0016 |            | 0.83437 |      |     |                      |                         |
| 2     | V\$OCT1_06 | 5       | 4318 | (-) | CWNAWTKWSATRYN       | AGAAATAAATTATT          |
| M0016 |            |         |      |     |                      |                         |
| 2     | V\$OCT1_06 | 0.90625 | 4325 | (+) | CWNAWTKWSATRYN       | AATTATTAATTTCT          |
| M0016 |            | 0.84765 |      |     |                      |                         |
| 2     | V\$OCT1_06 | 6       | 4326 | (-) | CWNAWTKWSATRYN       | ATTATTAATTTCTT          |
| M0013 |            | 0.83939 |      |     | NNNNNNNWWATGCAAATNNN |                         |
| 8     | V\$OCT1_04 | 8       | 4329 | (+) | WNNW                 | ATTAAATTTCTTCAAAAAAAAAA |
| M0016 |            | 0.82695 |      |     |                      |                         |
| 2     | V\$OCT1_06 | 3       | 4352 | (+) | CWNAWTKWSATRYN       | AGCAATGTGATAGC          |
| M0013 |            | 0.75028 |      |     |                      |                         |
| 5     | V\$OCT1_01 | 6       | 4369 | (+) | NNNNWTATGCAAATNTNNN  | TTTTATGTGCTAAATGTAT     |
| M0024 |            | 0.79923 |      |     |                      |                         |
| 8     | V\$OCT1_07 | 7       | 4372 | (+) | TNTATGNTAATT         | TATGTGCTAAAT            |
| M0016 |            | 0.80585 |      |     |                      |                         |
| 2     | V\$OCT1_06 | 9       | 4398 | (-) | CWNAWTKWSATRYN       | CAAAATAAAAAATAG         |
| M0024 |            | 0.81725 |      |     |                      |                         |
| 8     | V\$OCT1_07 | 7       | 4401 | (-) | TNTATGNTAATT         | AATAAAAAATAGT           |
| M0013 |            | 0.73864 |      |     |                      |                         |
| 5     | V\$OCT1_01 | 9       | 4408 | (+) | NNNNWTATGCAAATNTNNN  | ATAGTTAAGATAATATTTA     |
| M0013 |            | 0.78063 |      |     | NNNNNNNWWATGCAAATNNN |                         |
| 8     | V\$OCT1_04 | 6       | 4412 | (+) | WNNW                 | TTAAGATAATATTTATTACTAGC |
| M0013 |            | 0.81537 |      |     |                      |                         |
| 6     | V\$OCT1_02 | 6       | 4416 | (+) | NNGAATATKCANNNN      | GATAATATTTATTAC         |
| M0013 |            | 0.84828 |      |     |                      |                         |
| 7     | V\$OCT1_03 | 1       | 4418 | (-) | NNNRTAATNANNN        | TAATATTTATTAC           |
| M0013 |            | 0.89253 |      |     |                      |                         |
| 7     | V\$OCT1_03 | 3       | 4421 | (-) | NNNRTAATNANNN        | TATTTATTACTAG           |
| M0013 |            | 0.87080 |      |     |                      |                         |
| 7     | V\$OCT1_03 | 2       | 4430 | (+) | NNNRTAATNANNN        | CTAGCAATTATGA           |
| M0013 |            | 0.87435 |      |     |                      |                         |
| 7     | V\$OCT1_03 | 8       | 4431 | (-) | NNNRTAATNANNN        | TAGCAATTATGAG           |
| M0016 |            | 0.86289 |      |     |                      |                         |
| 2     | V\$OCT1_06 | 1       | 4435 | (+) | CWNAWTKWSATRYN       | AATTATGAGATGAA          |
| M0019 |            | 0.79530 |      |     |                      |                         |
| 5     | V\$OCT1_Q6 | 6       | 4444 | (-) | NNNNATGCAAATNAN      | ATGAACTGCATAATC         |
| M0013 |            | 0.85787 |      |     |                      |                         |
| 6     | V\$OCT1_02 | 8       | 4446 | (-) | NNGAATATKCANNNN      | GAAGCTGCATAATCCA        |
| M0016 |            | 0.84765 |      |     |                      |                         |
| 2     | V\$OCT1_06 | 6       | 4488 | (+) | CWNAWTKWSATRYN       | CAACTTTTCATTAC          |
| M0013 |            | 0.90596 |      |     |                      |                         |
| 7     | V\$OCT1_03 | 6       | 4492 | (-) | NNNRTAATNANNN        | TTTTATTACAGC            |
| M0019 |            | 0.80895 |      |     |                      |                         |
| 5     | V\$OCT1_Q6 | 2       | 4573 | (+) | NNNNATGCAAATNAN      | ATCAATGAAAACTAT         |
| M0013 |            | 0.73368 |      |     |                      |                         |
| 5     | V\$OCT1_01 | 9       | 4598 | (+) | NNNNWTATGCAAATNTNNN  | ACTGATATCCAGATGTTAT     |
| M0016 |            | 0.81367 |      |     |                      |                         |
| 2     | V\$OCT1_06 | 2       | 4601 | (-) | CWNAWTKWSATRYN       | GATATCCAGATGTT          |
| M0013 |            | 0.78774 |      |     | NNNNNNNWWATGCAAATNNN |                         |
| 8     | V\$OCT1_04 | 6       | 4606 | (-) | WNNW                 | CCAGATGTTATGCATCCCTCTAT |
| M0013 |            | 0.79074 |      |     |                      |                         |
| 6     | V\$OCT1_02 | 2       | 4609 | (+) | NNGAATATKCANNNN      | GATGTTATGCATCCC         |

|       |            |         |      |     |                     |                         |
|-------|------------|---------|------|-----|---------------------|-------------------------|
| M0013 |            | 0.78941 |      |     | NNNNNNNWATGCAAATNNN |                         |
| 8     | V\$OCT1_04 | 9       | 4620 | (-) | WNNW                | TCCCTCTATATACAATAAAATAT |
| M0016 |            | 0.84726 |      |     |                     |                         |
| 2     | V\$OCT1_06 | 6       | 4630 | (-) | CWNAWTKWSATRYN      | TACAATAAAATATT          |
| M0013 |            | 0.85460 |      |     |                     |                         |
| 7     | V\$OCT1_03 | 3       | 4665 | (+) | NNNRTAATNANNN       | TTAGCAATAACGA           |
| M0016 |            | 0.82929 |      |     |                     |                         |
| 2     | V\$OCT1_06 | 7       | 4681 | (-) | CWNAWTKWSATRYN      | AACATTTTCAGGACA         |
| M0013 |            | 0.89727 |      |     |                     |                         |
| 7     | V\$OCT1_03 | 4       | 4691 | (+) | NNNRTAATNANNN       | GACATAATCATTG           |
| M0013 |            | 0.78858 |      |     | NNNNNNNWATGCAAATNNN |                         |
| 8     | V\$OCT1_04 | 2       | 4703 | (+) | WNNW                | GATCATTTATTTTAACTATAA   |
| M0016 |            | 0.80820 |      |     |                     |                         |
| 2     | V\$OCT1_06 | 3       | 4703 | (+) | CWNAWTKWSATRYN      | GATCATTTATTTTT          |
| M0013 |            |         |      |     | NNNNNNNWATGCAAATNNN |                         |
| 8     | V\$OCT1_04 | 0.7821  | 4705 | (-) | WNNW                | TCATTTATTTTAACTATAAAT   |
| M0013 |            | 0.79652 |      |     | NNNNNNNWATGCAAATNNN |                         |
| 8     | V\$OCT1_04 | 9       | 4713 | (-) | WNNW                | TTTTAACTATAAATGTGTAAGT  |
| M0016 |            | 0.81601 |      |     |                     |                         |
| 2     | V\$OCT1_06 | 6       | 4717 | (+) | CWNAWTKWSATRYN      | AAACTATAAATGTG          |
| M0013 |            | 0.76440 |      |     |                     |                         |
| 5     | V\$OCT1_01 | 3       | 4722 | (+) | NNNNWTATGCAAATNTNNN | ATAAATGTGTAAGTATGAA     |
| M0016 |            |         |      |     |                     |                         |
| 2     | V\$OCT1_06 | 0.88125 | 4725 | (-) | CWNAWTKWSATRYN      | AATGTGTAAGTATG          |
| M0013 |            | 0.84546 |      |     | NNNNNNNWATGCAAATNNN |                         |
| 8     | V\$OCT1_04 | 2       | 4728 | (+) | WNNW                | GTGTAAGTATGAAAATATGAGA  |
| M0013 |            | 0.73826 |      |     |                     |                         |
| 5     | V\$OCT1_01 | 8       | 4730 | (+) | NNNNWTATGCAAATNTNNN | GTAAGTATGAAAATATGA      |
| M0019 |            | 0.82751 |      |     |                     |                         |
| 5     | V\$OCT1_Q6 | 1       | 4732 | (+) | NNNNATGCAAATNAN     | AAGTATGAAAATAT          |
| M0016 |            | 0.88859 |      |     |                     |                         |
| 1     | V\$OCT1_05 | 4       | 4733 | (-) | MKNATTGTCATAYY      | AGTATGAAAATAT           |
| M0016 |            | 0.86015 |      |     |                     |                         |
| 2     | V\$OCT1_06 | 6       | 4733 | (-) | CWNAWTKWSATRYN      | AGTATGAAAATAT           |
| M0016 |            | 0.84218 |      |     |                     |                         |
| 2     | V\$OCT1_06 | 7       | 4741 | (+) | CWNAWTKWSATRYN      | AACTATGAGATAAT          |
| M0016 |            | 0.80429 |      |     |                     |                         |
| 2     | V\$OCT1_06 | 7       | 4742 | (-) | CWNAWTKWSATRYN      | ACTATGAGATAATG          |
| M0013 |            | 0.85089 |      |     | NNNNNNNWATGCAAATNNN |                         |
| 8     | V\$OCT1_04 | 9       | 4745 | (+) | WNNW                | ATGAGATAATGAAAAAATAATAT |
| M0013 |            | 0.91110 |      |     |                     |                         |
| 7     | V\$OCT1_03 | 2       | 4747 | (+) | NNNRTAATNANNN       | GAGATAATGAAAA           |
| M0013 |            | 0.81346 |      |     | NNNNNNNWATGCAAATNNN |                         |
| 8     | V\$OCT1_04 | 7       | 4774 | (+) | WNNW                | TCATGTTTCTGAAAAAAAATAA  |
| M0016 |            | 0.88906 |      |     |                     |                         |
| 2     | V\$OCT1_06 | 2       | 4789 | (+) | CWNAWTKWSATRYN      | AAAAATAAGATGCA          |
| M0013 |            | 0.79723 |      |     |                     |                         |
| 6     | V\$OCT1_02 | 9       | 4792 | (+) | NNGAATATKCANNNN     | AATAAGATGCAGGAT         |
| M0013 |            | 0.77422 |      |     |                     |                         |
| 6     | V\$OCT1_02 | 8       | 4807 | (+) | NNGAATATKCANNNN     | ACGAAAATGAATGTA         |
| M0016 |            | 0.84765 |      |     |                     |                         |
| 2     | V\$OCT1_06 | 6       | 4808 | (+) | CWNAWTKWSATRYN      | CGAAAATGAATGTA          |
| M0013 |            | 0.79757 |      |     | NNNNNNNWATGCAAATNNN |                         |
| 8     | V\$OCT1_04 | 4       | 4809 | (+) | WNNW                | GAAAATGAATGTATAGCAGTTGT |
| M0019 |            | 0.79093 |      |     |                     |                         |
| 5     | V\$OCT1_Q6 | 9       | 4813 | (+) | NNNNATGCAAATNAN     | ATGAATGTATAGCAG         |
| M0016 |            | 0.83437 |      |     |                     |                         |
| 2     | V\$OCT1_06 | 5       | 4814 | (-) | CWNAWTKWSATRYN      | TGAATGTATAGCAG          |
| M0016 |            | 0.82890 |      |     |                     |                         |
| 2     | V\$OCT1_06 | 6       | 4829 | (-) | CWNAWTKWSATRYN      | TGTACGTAATACAT          |
| M0016 |            | 0.81210 |      |     |                     |                         |
| 2     | V\$OCT1_06 | 9       | 4838 | (-) | CWNAWTKWSATRYN      | TACATATAAGTTAA          |
| M0013 |            |         |      |     |                     |                         |
| 5     | V\$OCT1_01 | 0.77108 | 4839 | (+) | NNNNWTATGCAAATNTNNN | ACATATAAGTTAATATTAT     |
| M0013 |            | 0.79987 |      |     | NNNNNNNWATGCAAATNNN |                         |
| 8     | V\$OCT1_04 | 5       | 4839 | (+) | WNNW                | ACATATAAGTTAATATTATATTA |

|       |            |         |      |     |                      |                         |
|-------|------------|---------|------|-----|----------------------|-------------------------|
| M0024 |            | 0.79245 |      |     |                      |                         |
| 8     | V\$OCT1_07 | 3       | 4842 | (+) | TNTATGNTAATT         | TATAAGTTAATA            |
| M0013 |            | 0.78586 |      |     |                      |                         |
| 6     | V\$OCT1_02 | 9       | 4844 | (-) | NNGAATATKCANNNN      | TAAGTTAATATTATA         |
| M0013 |            |         |      |     | NNNNNNNWWATGCAAATNNN |                         |
| 8     | V\$OCT1_04 | 0.79632 | 4850 | (+) | WNNW                 | AATATTATATTAAGATGTCTAGA |
| M0016 |            | 0.87890 |      |     |                      |                         |
| 2     | V\$OCT1_06 | 6       | 4850 | (-) | CWNAWTKWSATRYN       | AATATTATATTAAG          |
| M0016 |            | 0.81210 |      |     |                      |                         |
| 2     | V\$OCT1_06 | 9       | 4855 | (+) | CWNAWTKWSATRYN       | TATATTAAGATGTC          |
| M0016 |            | 0.82656 |      |     |                      |                         |
| 2     | V\$OCT1_06 | 2       | 4855 | (-) | CWNAWTKWSATRYN       | TATATTAAGATGTC          |
| M0013 |            |         |      |     | NNNNNNNWWATGCAAATNNN |                         |
| 8     | V\$OCT1_04 | 0.79381 | 4865 | (-) | WNNW                 | TGCTAGATTATCAGAATTTTG   |
| M0013 |            | 0.73655 |      |     |                      |                         |
| 5     | V\$OCT1_01 | 1       | 4867 | (-) | NNNNWTATGCAAATNTNNN  | TCTAGATTATCAGAATTTT     |
| M0013 |            | 0.87238 |      |     |                      |                         |
| 7     | V\$OCT1_03 | 2       | 4867 | (-) | NNNRATAATNANNN       | TCTAGATTATCAG           |
| M0016 |            | 0.80820 |      |     |                      |                         |
| 2     | V\$OCT1_06 | 3       | 4880 | (+) | CWNAWTKWSATRYN       | AATTTTTGAGTGTA          |
| M0013 |            | 0.73292 |      |     |                      |                         |
| 5     | V\$OCT1_01 | 6       | 4887 | (+) | NNNNWTATGCAAATNTNNN  | GAGTGTAGGCAAACCTTCT     |
| M0013 |            | 0.80075 |      |     |                      |                         |
| 6     | V\$OCT1_02 | 8       | 4902 | (-) | NNGAATATKCANNNN      | TTCTACAATATTCAT         |
| M0013 |            | 0.84797 |      |     | NNNNNNNWWATGCAAATNNN |                         |
| 8     | V\$OCT1_04 | 2       | 4902 | (-) | WNNW                 | TTCTACAATATTCATATTACTTT |
| M0013 |            | 0.81325 |      |     | NNNNNNNWWATGCAAATNNN |                         |
| 8     | V\$OCT1_04 | 8       | 4903 | (+) | WNNW                 | TCTACAATATTCATATTACTTTT |
| M0013 |            | 0.75600 |      |     |                      |                         |
| 5     | V\$OCT1_01 | 9       | 4904 | (-) | NNNNWTATGCAAATNTNNN  | CTACAATATTCATATTACT     |
| M0013 |            | 0.75848 |      |     |                      |                         |
| 5     | V\$OCT1_01 | 9       | 4905 | (+) | NNNNWTATGCAAATNTNNN  | TACAATATTCATATTACTT     |
| M0013 |            | 0.90660 |      |     |                      |                         |
| 6     | V\$OCT1_02 | 5       | 4905 | (+) | NNGAATATKCANNNN      | TACAATATTCATATT         |
| M0013 |            | 0.81727 |      |     |                      |                         |
| 6     | V\$OCT1_02 | 1       | 4908 | (-) | NNGAATATKCANNNN      | AATATTCATATTACT         |
| M0013 |            | 0.78690 |      |     | NNNNNNNWWATGCAAATNNN |                         |
| 8     | V\$OCT1_04 | 9       | 4908 | (-) | WNNW                 | AATATTCATATTACTTTTTAAAT |
| M0016 |            |         |      |     |                      |                         |
| 2     | V\$OCT1_06 | 0.81875 | 4908 | (-) | CWNAWTKWSATRYN       | AATATTCATATTAC          |
| M0024 |            | 0.79520 |      |     |                      |                         |
| 8     | V\$OCT1_07 | 9       | 4908 | (+) | TNTATGNTAATT         | AATATTCATATT            |
| M0013 |            | 0.79882 |      |     | NNNNNNNWWATGCAAATNNN |                         |
| 8     | V\$OCT1_04 | 9       | 4916 | (-) | WNNW                 | TATTACTTTTTAAATTTTAAACA |
| M0016 |            | 0.82148 |      |     |                      |                         |
| 2     | V\$OCT1_06 | 4       | 4920 | (+) | CWNAWTKWSATRYN       | ACTTTTTAAATTTT          |
| M0024 |            | 0.79330 |      |     |                      |                         |
| 8     | V\$OCT1_07 | 1       | 4920 | (+) | TNTATGNTAATT         | ACTTTTTAAATT            |
| M0013 |            |         |      |     | NNNNNNNWWATGCAAATNNN |                         |
| 8     | V\$OCT1_04 | 0.80092 | 4921 | (+) | WNNW                 | CTTTTTAAATTTTAAACAAATGA |
| M0013 |            | 0.80133 |      |     | NNNNNNNWWATGCAAATNNN |                         |
| 8     | V\$OCT1_04 | 8       | 4923 | (-) | WNNW                 | TTTTAAATTTTAAACAAATGATT |
| M0016 |            | 0.80820 |      |     |                      |                         |
| 2     | V\$OCT1_06 | 3       | 4943 | (+) | CWNAWTKWSATRYN       | ATTTAATAAATTTA          |
| M0013 |            | 0.79318 |      |     | NNNNNNNWWATGCAAATNNN |                         |
| 8     | V\$OCT1_04 | 3       | 4944 | (+) | WNNW                 | TTTAATAAATTTAGAGAAAAACA |
| M0013 |            | 0.79715 |      |     | NNNNNNNWWATGCAAATNNN |                         |
| 8     | V\$OCT1_04 | 6       | 4945 | (-) | WNNW                 | TTAATAAATTTAGAGAAAAACAA |
| M0016 |            | 0.83476 |      |     |                      |                         |
| 2     | V\$OCT1_06 | 6       | 4988 | (-) | CWNAWTKWSATRYN       | TGAATTCTATTATT          |
| M0013 |            | 0.81723 |      |     | NNNNNNNWWATGCAAATNNN |                         |
| 8     | V\$OCT1_04 | 1       | 4995 | (-) | WNNW                 | TATTATTTTTTCAAATTTCTAT  |
| M0013 |            | 0.80782 |      |     | NNNNNNNWWATGCAAATNNN |                         |
| 8     | V\$OCT1_04 | 1       | 4996 | (+) | WNNW                 | ATTATTTTTTCAAATTTCTATA  |
| M0013 |            | 0.75562 |      |     |                      |                         |
| 5     | V\$OCT1_01 | 8       | 4998 | (+) | NNNNWTATGCAAATNTNNN  | TATTTTTTCAAATTTCTA      |

|       |            |         |      |     |                      |                         |
|-------|------------|---------|------|-----|----------------------|-------------------------|
| M0016 |            | 0.82617 |      |     |                      |                         |
| 2     | V\$OCT1_06 | 2       | 4999 | (+) | CWNAWTKWSATRYN       | ATTTTTTCAAATT           |
| M0024 |            | 0.81450 |      |     |                      |                         |
| 8     | V\$OCT1_07 | 1       | 5001 | (+) | TNTATGNTAATT         | TTTTTCAAATT             |
| M0013 |            | 0.82517 |      |     | NNNNNNNWWATGCAAATNNN |                         |
| 8     | V\$OCT1_04 | 8       | 5003 | (-) | WNNW                 | TTTCAAATTTCTATACCTACAA  |
| M0013 |            | 0.77890 |      |     |                      |                         |
| 5     | V\$OCT1_01 | 1       | 5005 | (-) | NNNNWTATGCAAATNTNNN  | TTCAAATTTCTATACCTAC     |
| M0016 |            | 0.81757 |      |     |                      |                         |
| 2     | V\$OCT1_06 | 8       | 5007 | (+) | CWNAWTKWSATRYN       | CAAATTTCTATACC          |
| M0016 |            | 0.80078 |      |     |                      |                         |
| 2     | V\$OCT1_06 | 1       | 5007 | (-) | CWNAWTKWSATRYN       | CAAATTTCTATACC          |
| M0024 |            | 0.84206 |      |     |                      |                         |
| 8     | V\$OCT1_07 | 1       | 5009 | (-) | TNTATGNTAATT         | AATTTCTATACC            |
| M0013 |            | 0.78857 |      |     |                      |                         |
| 6     | V\$OCT1_02 | 6       | 5021 | (+) | NNGAATATKCANNNN      | TACAACATTCAAAAAG        |
| M0016 |            | 0.80859 |      |     |                      |                         |
| 2     | V\$OCT1_06 | 4       | 5024 | (-) | CWNAWTKWSATRYN       | AACATTCAAAAAGGT         |
| M0016 |            | 0.80859 |      |     |                      |                         |
| 2     | V\$OCT1_06 | 4       | 5043 | (+) | CWNAWTKWSATRYN       | GAGTCTTTTATATC          |
| M0016 |            | 0.88281 |      |     |                      |                         |
| 2     | V\$OCT1_06 | 2       | 5051 | (-) | CWNAWTKWSATRYN       | TATATCCAAGGAAT          |
| M0013 |            | 0.84109 |      |     |                      |                         |
| 6     | V\$OCT1_02 | 4       | 5059 | (+) | NNGAATATKCANNNN      | AGGAATATGTGTGCA         |
| M0019 |            | 0.80103 |      |     |                      |                         |
| 5     | V\$OCT1_Q6 | 7       | 5065 | (+) | NNNNATGCAAATNAN      | ATGTGTGCAATGTCC         |
| M0016 |            | 0.80820 |      |     |                      |                         |
| 2     | V\$OCT1_06 | 3       | 5066 | (-) | CWNAWTKWSATRYN       | TGTGTGCAATGTCC          |
| M0016 |            | 0.86093 |      |     |                      |                         |
| 2     | V\$OCT1_06 | 7       | 5086 | (+) | CWNAWTKWSATRYN       | CGAACTGCCATTTT          |
| M0013 |            | 0.75467 |      |     |                      |                         |
| 5     | V\$OCT1_01 | 4       | 5092 | (-) | NNNNWTATGCAAATNTNNN  | GCCATTTTAAAATATTTAA     |
| M0016 |            | 0.86054 |      |     |                      |                         |
| 2     | V\$OCT1_06 | 7       | 5094 | (+) | CWNAWTKWSATRYN       | CATTTTAAAATATT          |
| M0016 |            | 0.82656 |      |     |                      |                         |
| 2     | V\$OCT1_06 | 2       | 5094 | (-) | CWNAWTKWSATRYN       | CATTTTAAAATATT          |
| M0013 |            | 0.80029 |      |     | NNNNNNNWWATGCAAATNNN |                         |
| 8     | V\$OCT1_04 | 3       | 5096 | (-) | WNNW                 | TTTTAAAATATTTAAAATTATGA |
| M0013 |            | 0.80614 |      |     | NNNNNNNWWATGCAAATNNN |                         |
| 8     | V\$OCT1_04 | 8       | 5097 | (+) | WNNW                 | TTTAAAATATTTAAAATTATGAC |
| M0013 |            | 0.76325 |      |     |                      |                         |
| 5     | V\$OCT1_01 | 8       | 5099 | (+) | NNNNWTATGCAAATNTNNN  | TAAAATATTTAAAATTATG     |
| M0013 |            | 0.79263 |      |     |                      |                         |
| 6     | V\$OCT1_02 | 7       | 5099 | (+) | NNGAATATKCANNNN      | TAAAATATTTAAAAT         |
| M0016 |            | 0.82109 |      |     |                      |                         |
| 2     | V\$OCT1_06 | 4       | 5101 | (+) | CWNAWTKWSATRYN       | AAATATTTAAAATT          |
| M0016 |            | 0.83437 |      |     |                      |                         |
| 2     | V\$OCT1_06 | 5       | 5102 | (+) | CWNAWTKWSATRYN       | AATATTTAAAATTA          |
| M0016 |            | 0.85507 |      |     |                      |                         |
| 2     | V\$OCT1_06 | 8       | 5102 | (-) | CWNAWTKWSATRYN       | AATATTTAAAATTA          |
| M0016 |            | 0.81718 |      |     |                      |                         |
| 2     | V\$OCT1_06 | 7       | 5104 | (-) | CWNAWTKWSATRYN       | TATTTAAAATTATG          |
| M0013 |            | 0.88660 |      |     |                      |                         |
| 7     | V\$OCT1_03 | 6       | 5107 | (-) | NNNRTAATNANNN        | TTAAAATTATGAC           |
| M0016 |            | 0.82656 |      |     |                      |                         |
| 2     | V\$OCT1_06 | 2       | 5150 | (-) | CWNAWTKWSATRYN       | AGTTTTAAAGTTTT          |
| M0013 |            | 0.84065 |      |     | NNNNNNNWWATGCAAATNNN |                         |
| 8     | V\$OCT1_04 | 2       | 5153 | (-) | WNNW                 | TTTAAAGTTTTATATATACATGC |
| M0013 |            | 0.73693 |      |     |                      |                         |
| 5     | V\$OCT1_01 | 2       | 5155 | (-) | NNNNWTATGCAAATNTNNN  | TAAAGTTTATATATACAT      |
| M0016 |            | 0.84218 |      |     |                      |                         |
| 2     | V\$OCT1_06 | 7       | 5157 | (+) | CWNAWTKWSATRYN       | AAGTTTATATATA           |
| M0013 |            | 0.80426 |      |     | NNNNNNNWWATGCAAATNNN |                         |
| 8     | V\$OCT1_04 | 6       | 5159 | (-) | WNNW                 | GTTTATATATACATGCCTATGG  |
| M0016 |            | 0.80664 |      |     |                      |                         |
| 2     | V\$OCT1_06 | 1       | 5163 | (+) | CWNAWTKWSATRYN       | TATATATACATGCC          |

|       |            |         |      |     |                     |                         |
|-------|------------|---------|------|-----|---------------------|-------------------------|
| M0013 |            | 0.81723 |      |     | NNNNNNNWATGCAAATNNN |                         |
| 8     | V\$OCT1_04 | 1       | 5164 | (+) | WNNW                | ATATATACATGCCTATGGAAATT |
| M0013 |            | 0.82078 |      |     | NNNNNNNWATGCAAATNNN |                         |
| 8     | V\$OCT1_04 | 6       | 5170 | (+) | WNNW                | ACATGCCTATGGAAATTACTTTC |
| M0013 |            | 0.81323 |      |     |                     |                         |
| 5     | V\$OCT1_01 | 9       | 5172 | (+) | NNNNWTATGCAAATNTNNN | ATGCCTATGGAAATTACTT     |
| M0019 |            | 0.86244 |      |     |                     |                         |
| 5     | V\$OCT1_Q6 | 5       | 5174 | (+) | NNNNATGCAAATNAN     | GCCTATGGAAATTAC         |
| M0016 |            | 0.86667 |      |     |                     |                         |
| 1     | V\$OCT1_05 | 8       | 5175 | (-) | MKNATTTGCATAYY      | CCTATGGAAATTAC          |
| M0024 |            | 0.92728 |      |     |                     |                         |
| 8     | V\$OCT1_07 | 4       | 5175 | (+) | TNTATGNTAATT        | CCTATGGAAATT            |
| M0016 |            | 0.84218 |      |     |                     |                         |
| 2     | V\$OCT1_06 | 7       | 5180 | (+) | CWNAWTKWSATRYN      | GGAAATTACTTTCT          |
| M0016 |            | 0.80859 |      |     |                     |                         |
| 2     | V\$OCT1_06 | 4       | 5181 | (-) | CWNAWTKWSATRYN      | GAAATTACTTTCTC          |
| M0013 |            | 0.88739 |      |     |                     |                         |
| 7     | V\$OCT1_03 | 6       | 5203 | (+) | NNNRATAATNANNN      | CTCATAATGTGTG           |
| M0024 |            | 0.79351 |      |     |                     |                         |
| 8     | V\$OCT1_07 | 3       | 5227 | (-) | TNTATGNTAATT        | AATTAAGAAAAA            |
| M0024 |            | 0.79626 |      |     |                     |                         |
| 8     | V\$OCT1_07 | 9       | 5236 | (-) | TNTATGNTAATT        | AAATACTATAAA            |
| M0013 |            | 0.78690 |      |     | NNNNNNNWATGCAAATNNN |                         |
| 8     | V\$OCT1_04 | 9       | 5245 | (+) | WNNW                | AAAAACAAATGAAAGTTGATTTT |
| M0013 |            | 0.79192 |      |     | NNNNNNNWATGCAAATNNN |                         |
| 8     | V\$OCT1_04 | 8       | 5257 | (-) | WNNW                | AAGTTGATTTTTAAAAAGCATAA |
| M0013 |            | 0.82287 |      |     | NNNNNNNWATGCAAATNNN |                         |
| 8     | V\$OCT1_04 | 7       | 5263 | (-) | WNNW                | ATTTTTAAAAAGCATAATTATAA |
| M0013 |            |         |      |     | NNNNNNNWATGCAAATNNN |                         |
| 8     | V\$OCT1_04 | 0.79862 | 5264 | (+) | WNNW                | TTTTTAAAAAGCATAATTATAAA |
| M0013 |            | 0.73502 |      |     |                     |                         |
| 5     | V\$OCT1_01 | 5       | 5265 | (-) | NNNNWTATGCAAATNTNNN | TTTTAAAAAGCATAATTAT     |
| M0013 |            | 0.81889 |      |     |                     |                         |
| 6     | V\$OCT1_02 | 6       | 5269 | (-) | NNGAATATKCANNNN     | AAAAAGCATAATTAT         |
| M0013 |            | 0.92414 |      |     |                     |                         |
| 7     | V\$OCT1_03 | 1       | 5273 | (+) | NNNRATAATNANNN      | AGCATAATTATAA           |
| M0013 |            | 0.89806 |      |     |                     |                         |
| 7     | V\$OCT1_03 | 4       | 5274 | (-) | NNNRATAATNANNN      | GCATAATTATAAA           |
| M0013 |            | 0.79318 |      |     | NNNNNNNWATGCAAATNNN |                         |
| 8     | V\$OCT1_04 | 3       | 5282 | (-) | WNNW                | ATAAAACATTTATATATCGATGT |
| M0013 |            | 0.78786 |      |     |                     |                         |
| 5     | V\$OCT1_01 | 7       | 5284 | (-) | NNNNWTATGCAAATNTNNN | AAAACATTTATATATCGAT     |
| M0016 |            | 0.85546 |      |     |                     |                         |
| 2     | V\$OCT1_06 | 9       | 5286 | (+) | CWNAWTKWSATRYN      | AACATTTATATATC          |
| M0016 |            | 0.85507 |      |     |                     |                         |
| 2     | V\$OCT1_06 | 8       | 5286 | (-) | CWNAWTKWSATRYN      | AACATTTATATATC          |
| M0016 |            | 0.80039 |      |     |                     |                         |
| 2     | V\$OCT1_06 | 1       | 5333 | (-) | CWNAWTKWSATRYN      | AAAACCTCAAAAAAT         |
| M0013 |            | 0.78018 |      |     |                     |                         |
| 6     | V\$OCT1_02 | 4       | 5366 | (+) | NNGAATATKCANNNN     | AAATATATTCTCAAT         |
| M0013 |            | 0.78126 |      |     | NNNNNNNWATGCAAATNNN |                         |
| 8     | V\$OCT1_04 | 3       | 5386 | (-) | WNNW                | TCTTATTTTAAACAATATAGATT |
| M0013 |            | 0.83513 |      |     |                     |                         |
| 6     | V\$OCT1_02 | 8       | 5415 | (-) | NNGAATATKCANNNN     | AAACTGAATATAAGT         |
| M0016 |            | 0.84765 |      |     |                     |                         |
| 2     | V\$OCT1_06 | 6       | 5419 | (-) | CWNAWTKWSATRYN      | TGAATATAAGTTAT          |
| M0013 |            | 0.81221 |      |     | NNNNNNNWATGCAAATNNN |                         |
| 8     | V\$OCT1_04 | 2       | 5422 | (-) | WNNW                | ATATAAGTTATTCATATTTTCA  |
| M0013 |            | 0.85633 |      |     | NNNNNNNWATGCAAATNNN |                         |
| 8     | V\$OCT1_04 | 6       | 5423 | (+) | WNNW                | TATAAGTTATTCATATTTTCAT  |
| M0013 |            | 0.74914 |      |     |                     |                         |
| 5     | V\$OCT1_01 | 2       | 5425 | (+) | NNNNWTATGCAAATNTNNN | TAAGTTATTCATATTTTTC     |
| M0013 |            |         |      |     |                     |                         |
| 6     | V\$OCT1_02 | 0.78262 | 5425 | (+) | NNGAATATKCANNNN     | TAAGTTATTCATATT         |
| M0016 |            | 0.82109 |      |     |                     |                         |
| 2     | V\$OCT1_06 | 4       | 5426 | (+) | CWNAWTKWSATRYN      | AAGTTATTCATATT          |

|       |            |         |      |     |                      |                          |
|-------|------------|---------|------|-----|----------------------|--------------------------|
| M0013 |            | 0.78478 |      |     |                      |                          |
| 6     | V\$OCT1_02 | 6       | 5428 | (-) | NNGAATATKCANNNN      | GTTATTCATATTTTT          |
| M0019 |            |         |      |     |                      |                          |
| 5     | V\$OCT1_Q6 | 0.82833 | 5428 | (-) | NNNNATGCAAATNAN      | GTTATTCATATTTTT          |
| M0013 |            | 0.81451 |      |     | NNNNNNNWWATGCAAATNNN |                          |
| 8     | V\$OCT1_04 | 3       | 5431 | (-) | WNNW                 | ATTCATATTTTTTCATTTAAGCAA |
| M0016 |            | 0.90351 |      |     |                      |                          |
| 2     | V\$OCT1_06 | 6       | 5435 | (+) | CWNAWTKWSATRYN       | ATATTTTTTCATTTA          |
| M0013 |            | 0.81974 |      |     | NNNNNNNWWATGCAAATNNN |                          |
| 8     | V\$OCT1_04 | 1       | 5440 | (+) | WNNW                 | TTTCATTTAAGCAAATATCACGT  |
| M0013 |            | 0.85558 |      |     |                      |                          |
| 5     | V\$OCT1_01 | 9       | 5442 | (+) | NNNNWTATGCAAATNTNNN  | TCATTTAAGCAAATATCAC      |
| M0016 |            | 0.82617 |      |     |                      |                          |
| 2     | V\$OCT1_06 | 2       | 5453 | (-) | CWNAWTKWSATRYN       | AATATCACGTGTAT           |
| M0013 |            | 0.78335 |      |     | NNNNNNNWWATGCAAATNNN |                          |
| 8     | V\$OCT1_04 | 4       | 5498 | (-) | WNNW                 | TCTTCAACCTTGAATTTTCTCC   |
| M0016 |            | 0.89101 |      |     |                      |                          |
| 2     | V\$OCT1_06 | 6       | 5502 | (+) | CWNAWTKWSATRYN       | CAACCTTGAATTTT           |
| M0013 |            | 0.82214 |      |     |                      |                          |
| 6     | V\$OCT1_02 | 4       | 5504 | (-) | NNGAATATKCANNNN      | ACCTTGAATTTTTCT          |
| M0013 |            |         |      |     |                      |                          |
| 7     | V\$OCT1_03 | 0.86132 | 5522 | (+) | NNNRTAATNANNN        | TAGACAATGATTT            |
| M0013 |            | 0.88897 |      |     |                      |                          |
| 7     | V\$OCT1_03 | 7       | 5557 | (-) | NNNRTAATNANNN        | AGTTCATTATTAC            |
| M0013 |            | 0.91347 |      |     |                      |                          |
| 7     | V\$OCT1_03 | 3       | 5560 | (-) | NNNRTAATNANNN        | TCATTATTACTAT            |
| M0013 |            | 0.77125 |      |     |                      |                          |
| 6     | V\$OCT1_02 | 1       | 5565 | (+) | NNGAATATKCANNNN      | ATTACTATTTAGTTA          |
| M0024 |            | 0.80072 |      |     |                      |                          |
| 8     | V\$OCT1_07 | 1       | 5630 | (+) | TNTATGNTAATT         | ACCATGGAAAAT             |
| M0013 |            | 0.80346 |      |     |                      |                          |
| 6     | V\$OCT1_02 | 5       | 5634 | (+) | NNGAATATKCANNNN      | TGGAAAATGCTTTAT          |
| M0013 |            | 0.85499 |      |     |                      |                          |
| 7     | V\$OCT1_03 | 8       | 5644 | (+) | NNNRTAATNANNN        | TTTATAATATTTT            |
| M0013 |            | 0.81221 |      |     | NNNNNNNWWATGCAAATNNN |                          |
| 8     | V\$OCT1_04 | 2       | 5646 | (-) | WNNW                 | TATAATATTTTACAATACTAAAA  |
| M0013 |            | 0.78628 |      |     | NNNNNNNWWATGCAAATNNN |                          |
| 8     | V\$OCT1_04 | 2       | 5647 | (-) | WNNW                 | ATAATATTTTACAATACTAAAAAT |
| M0016 |            |         |      |     |                      |                          |
| 2     | V\$OCT1_06 | 0.81875 | 5651 | (-) | CWNAWTKWSATRYN       | TATTTTACAATACT           |
| M0013 |            | 0.80949 |      |     | NNNNNNNWWATGCAAATNNN |                          |
| 8     | V\$OCT1_04 | 4       | 5652 | (+) | WNNW                 | ATTTTACAATACTAAAATAAAAA  |
| M0013 |            | 0.80761 |      |     | NNNNNNNWWATGCAAATNNN |                          |
| 8     | V\$OCT1_04 | 2       | 5654 | (+) | WNNW                 | TTTACAATACTAAAATAAAAAACA |
| M0016 |            | 0.81367 |      |     |                      |                          |
| 2     | V\$OCT1_06 | 2       | 5690 | (+) | CWNAWTKWSATRYN       | TTGTCTTTAATATA           |
| M0016 |            | 0.82656 |      |     |                      |                          |
| 2     | V\$OCT1_06 | 2       | 5698 | (-) | CWNAWTKWSATRYN       | AATATAAAAAGGTAT          |
| M0016 |            | 0.82109 |      |     |                      |                          |
| 2     | V\$OCT1_06 | 4       | 5728 | (-) | CWNAWTKWSATRYN       | AAAATCTAGAATTC           |
| M0013 |            | 0.79694 |      |     | NNNNNNNWWATGCAAATNNN |                          |
| 8     | V\$OCT1_04 | 7       | 5743 | (-) | WNNW                 | TGCTTTTTTTTAACTTTTGTTTT  |
| M0016 |            | 0.80039 |      |     |                      |                          |
| 2     | V\$OCT1_06 | 1       | 5754 | (+) | CWNAWTKWSATRYN       | AACCTTGTGTTTCT           |
| M0013 |            | 0.90952 |      |     |                      |                          |
| 7     | V\$OCT1_03 | 2       | 5764 | (-) | NNNRTAATNANNN        | TTCTTATTACTTC            |
| M0013 |            | 0.78251 |      |     | NNNNNNNWWATGCAAATNNN |                          |
| 8     | V\$OCT1_04 | 8       | 5872 | (-) | WNNW                 | AAGTTTATTCTGCAAAGTTTAAT  |
| M0013 |            | 0.79401 |      |     | NNNNNNNWWATGCAAATNNN |                          |
| 8     | V\$OCT1_04 | 9       | 5873 | (+) | WNNW                 | AGTTTATTCTGCAAAGTTTAATG  |
| M0013 |            | 0.80045 |      |     |                      |                          |
| 5     | V\$OCT1_01 | 8       | 5875 | (+) | NNNNWTATGCAAATNTNNN  | TTTATTCTGCAAAGTTTAA      |
| M0016 |            | 0.81757 |      |     |                      |                          |
| 2     | V\$OCT1_06 | 8       | 5884 | (+) | CWNAWTKWSATRYN       | CAAAGTTTAATGAT           |
| M0013 |            | 0.87514 |      |     |                      |                          |
| 7     | V\$OCT1_03 | 8       | 5887 | (+) | NNNRTAATNANNN        | AGTTTAATGATAT            |



|       |            |         |      |     |                     |                         |
|-------|------------|---------|------|-----|---------------------|-------------------------|
| M0013 |            | 0.79652 |      |     | NNNNNNNWATGCAAATNNN |                         |
| 8     | V\$OCT1_04 | 9       | 5890 | (+) | WNNW                | TTAATGATATTAAATGCCTTTT  |
| M0016 |            | 0.85721 |      |     |                     |                         |
| 1     | V\$OCT1_05 | 4       | 5895 | (-) | MKNATTTGCATAYY      | GATATTAAATGCC           |
| M0016 |            | 0.85546 |      |     |                     |                         |
| 2     | V\$OCT1_06 | 9       | 5895 | (+) | CWNAWTKWSATRYN      | GATATTAAATGCC           |
| M0016 |            | 0.88320 |      |     |                     |                         |
| 2     | V\$OCT1_06 | 3       | 5895 | (-) | CWNAWTKWSATRYN      | GATATTAAATGCC           |
| M0013 |            | 0.81618 |      |     |                     |                         |
| 6     | V\$OCT1_02 | 8       | 5898 | (+) | NNGAATATKCANNNN     | ATTAATTAATGCCTTTT       |
| M0016 |            | 0.83437 |      |     |                     |                         |
| 2     | V\$OCT1_06 | 5       | 5917 | (-) | CWNAWTKWSATRYN      | AAAAACTAAGTATT          |
| M0016 |            | 0.82148 |      |     |                     |                         |
| 2     | V\$OCT1_06 | 4       | 5925 | (-) | CWNAWTKWSATRYN      | AGTATTTAAACCCC          |
| M0016 |            | 0.84218 |      |     |                     |                         |
| 2     | V\$OCT1_06 | 7       | 5944 | (-) | CWNAWTKWSATRYN      | ATAATCTAATAATC          |
| M0013 |            | 0.79569 |      |     | NNNNNNNWATGCAAATNNN |                         |
| 8     | V\$OCT1_04 | 2       | 5948 | (-) | WNNW                | TCTAATAATCTGTGTAAGTCA   |
| M0013 |            | 0.84828 |      |     |                     |                         |
| 7     | V\$OCT1_03 | 1       | 5949 | (+) | NNNRATAATNANNN      | CTAATAATCTGTG           |
| M0016 |            | 0.82109 |      |     |                     |                         |
| 2     | V\$OCT1_06 | 4       | 5984 | (+) | CWNAWTKWSATRYN      | AATCATGTGAATTA          |
| M0019 |            | 0.80567 |      |     |                     |                         |
| 5     | V\$OCT1_Q6 | 7       | 5984 | (+) | NNNNATGCAAATNAN     | AATCATGTGAATTAA         |
| M0024 |            | 0.82276 |      |     |                     |                         |
| 8     | V\$OCT1_07 | 9       | 5985 | (+) | TNTATGNTAATT        | ATCATGTGAATT            |
| M0016 |            | 0.82148 |      |     |                     |                         |
| 2     | V\$OCT1_06 | 4       | 5995 | (-) | CWNAWTKWSATRYN      | TTAATCTCAAAGTT          |
| M0016 |            |         |      |     |                     |                         |
| 2     | V\$OCT1_06 | 0.81875 | 5997 | (-) | CWNAWTKWSATRYN      | AATCTCAAAGTTCT          |
| M0013 |            | 0.84393 |      |     |                     |                         |
| 7     | V\$OCT1_03 | 5       | 6070 | (+) | NNNRATAATNANNN      | TTAGCAATAAGAG           |
| M0016 |            | 0.86054 |      |     |                     |                         |
| 2     | V\$OCT1_06 | 7       | 6093 | (+) | CWNAWTKWSATRYN      | CAGAATTTAGTACT          |
| M0016 |            | 0.82929 |      |     |                     |                         |
| 2     | V\$OCT1_06 | 7       | 6094 | (-) | CWNAWTKWSATRYN      | AGAATTTAGTACTG          |
| M0013 |            | 0.79569 |      |     | NNNNNNNWATGCAAATNNN |                         |
| 8     | V\$OCT1_04 | 2       | 6097 | (+) | WNNW                | ATTTAGTACTGGAAAAAATGAA  |
| M0013 |            |         |      |     | NNNNNNNWATGCAAATNNN |                         |
| 8     | V\$OCT1_04 | 0.80092 | 6107 | (+) | WNNW                | GGAAAAAATGAAAACAAAAGTA  |
| M0019 |            |         |      |     |                     |                         |
| 5     | V\$OCT1_Q6 | 0.79476 | 6111 | (+) | NNNNATGCAAATNAN     | AAAAATGAAAACAAA         |
| M0016 |            | 0.81601 |      |     |                     |                         |
| 2     | V\$OCT1_06 | 6       | 6122 | (-) | CWNAWTKWSATRYN      | CAAAAGTAAAGTTT          |
| M0016 |            | 0.80429 |      |     |                     |                         |
| 2     | V\$OCT1_06 | 7       | 6128 | (+) | CWNAWTKWSATRYN      | TAAAGTTTAATACT          |
| M0016 |            | 0.80312 |      |     |                     |                         |
| 2     | V\$OCT1_06 | 5       | 6129 | (-) | CWNAWTKWSATRYN      | AAAGTTTAATACTT          |
| M0016 |            | 0.82656 |      |     |                     |                         |
| 2     | V\$OCT1_06 | 2       | 6177 | (+) | CWNAWTKWSATRYN      | CATCTCTGAATACT          |
| M0013 |            | 0.81375 |      |     |                     |                         |
| 6     | V\$OCT1_02 | 2       | 6179 | (-) | NNGAATATKCANNNN     | TCTCTGAATACTTCT         |
| M0016 |            | 0.83945 |      |     |                     |                         |
| 2     | V\$OCT1_06 | 3       | 6186 | (+) | CWNAWTKWSATRYN      | ATACTTCTCATACA          |
| M0019 |            | 0.81850 |      |     |                     |                         |
| 5     | V\$OCT1_Q6 | 4       | 6186 | (-) | NNNNATGCAAATNAN     | ATACTTCTCATACAC         |
| M0016 |            | 0.82890 |      |     |                     |                         |
| 2     | V\$OCT1_06 | 6       | 6187 | (-) | CWNAWTKWSATRYN      | TACTTCTCATACAC          |
| M0013 |            | 0.73407 |      |     |                     |                         |
| 5     | V\$OCT1_01 | 1       | 6200 | (-) | NNNNWTATGCAAATNTNNN | CTTATATTTACTTTCTCCT     |
| M0016 |            | 0.83437 |      |     |                     |                         |
| 2     | V\$OCT1_06 | 5       | 6202 | (-) | CWNAWTKWSATRYN      | TATATTTACTTTCT          |
| M0016 |            | 0.80585 |      |     |                     |                         |
| 2     | V\$OCT1_06 | 9       | 6214 | (+) | CWNAWTKWSATRYN      | CTCCTTTTGTTC            |
| M0013 |            | 0.80949 |      |     | NNNNNNNWATGCAAATNNN |                         |
| 8     | V\$OCT1_04 | 4       | 6231 | (-) | WNNW                | ACATTCTGTTTGAATGAATACAT |

|       |            |         |      |     |                     |                          |
|-------|------------|---------|------|-----|---------------------|--------------------------|
| M0013 |            | 0.80238 |      |     | NNNNNNNWATGCAAATNNN |                          |
| 8     | V\$OCT1_04 | 4       | 6242 | (+) | WNNW                | GAATGAATACATAAAATATGTCTT |
| M0013 |            | 0.73292 |      |     |                     |                          |
| 5     | V\$OCT1_01 | 6       | 6244 | (+) | NNNNWTATGCAAATNTNNN | ATGAATACATAAAATATGTC     |
| M0016 |            | 0.82148 |      |     |                     |                          |
| 2     | V\$OCT1_06 | 4       | 6247 | (+) | CWNAWTKWSATRYN      | AATACATAAAATATG          |
| M0016 |            | 0.81718 |      |     |                     |                          |
| 2     | V\$OCT1_06 | 7       | 6247 | (-) | CWNAWTKWSATRYN      | AATACATAAAATATG          |
| M0013 |            | 0.78532 |      |     |                     |                          |
| 6     | V\$OCT1_02 | 8       | 6249 | (-) | NNGAATATKCANNNN     | TACATAAAATATGTCT         |
| M0013 |            | 0.87909 |      |     |                     |                          |
| 7     | V\$OCT1_03 | 9       | 6249 | (+) | NNNRTAATNANNN       | TACATAAAATATGT           |
| M0013 |            | 0.80489 |      |     | NNNNNNNWATGCAAATNNN |                          |
| 8     | V\$OCT1_04 | 3       | 6249 | (-) | WNNW                | TACATAAAATATGTCTTCTTTTAT |
| M0013 |            | 0.77883 |      |     |                     |                          |
| 6     | V\$OCT1_02 | 1       | 6252 | (+) | NNGAATATKCANNNN     | ATAAATATGTCTTCT          |
| M0016 |            | 0.84765 |      |     |                     |                          |
| 2     | V\$OCT1_06 | 6       | 6279 | (+) | CWNAWTKWSATRYN      | AAAAGTGTAATTTT           |
| M0016 |            | 0.86289 |      |     |                     |                          |
| 2     | V\$OCT1_06 | 1       | 6280 | (-) | CWNAWTKWSATRYN      | AAAGTGTAATTTT            |
| M0013 |            | 0.84037 |      |     |                     |                          |
| 7     | V\$OCT1_03 | 9       | 6282 | (+) | NNNRTAATNANNN       | AGTGTAATTTTTA            |
| M0016 |            | 0.83984 |      |     |                     |                          |
| 2     | V\$OCT1_06 | 4       | 6285 | (+) | CWNAWTKWSATRYN      | GTAATTTTTATTG            |
| M0019 |            | 0.83542 |      |     |                     |                          |
| 5     | V\$OCT1_Q6 | 6       | 6285 | (-) | NNNNATGCAAATNAN     | GTAATTTTTATTGC           |
| M0013 |            | 0.85675 |      |     | NNNNNNNWATGCAAATNNN |                          |
| 8     | V\$OCT1_04 | 4       | 6287 | (-) | WNNW                | AATTTTTATTGTCAGTGTAATTT  |
| M0019 |            | 0.79148 |      |     |                     |                          |
| 5     | V\$OCT1_Q6 | 5       | 6291 | (-) | NNNNATGCAAATNAN     | TTTATTGTCAGTGTA          |
| M0013 |            | 0.86566 |      |     |                     |                          |
| 7     | V\$OCT1_03 | 6       | 6300 | (+) | NNNRTAATNANNN       | AGTGTAATTTTGT            |
| M0013 |            |         |      |     | NNNNNNNWATGCAAATNNN |                          |
| 8     | V\$OCT1_04 | 0.83898 | 6317 | (+) | WNNW                | TGTTTCTATTTATATGGAAAGA   |
| M0013 |            | 0.78021 |      |     | NNNNNNNWATGCAAATNNN |                          |
| 8     | V\$OCT1_04 | 7       | 6318 | (-) | WNNW                | TGTTTCTATTTATATGGAAAGAC  |
| M0013 |            | 0.85736 |      |     |                     |                          |
| 7     | V\$OCT1_03 | 9       | 6321 | (-) | NNNRTAATNANNN       | TTCTATTTATATG            |
| M0013 |            | 0.79234 |      |     | NNNNNNNWATGCAAATNNN |                          |
| 8     | V\$OCT1_04 | 6       | 6322 | (-) | WNNW                | TCTATTTATATGGAAAGACCTAA  |
| M0013 |            |         |      |     | NNNNNNNWATGCAAATNNN |                          |
| 8     | V\$OCT1_04 | 0.79381 | 6323 | (+) | WNNW                | CTATTTATATGGAAAGACCTAAT  |
| M0013 |            | 0.79072 |      |     |                     |                          |
| 5     | V\$OCT1_01 | 9       | 6325 | (+) | NNNNWTATGCAAATNTNNN | ATTTATATGGAAAGACCTA      |
| M0019 |            | 0.80240 |      |     |                     |                          |
| 5     | V\$OCT1_Q6 | 2       | 6327 | (+) | NNNNATGCAAATNAN     | TTATATGGAAAGACC          |
| M0016 |            | 0.83437 |      |     |                     |                          |
| 2     | V\$OCT1_06 | 5       | 6328 | (-) | CWNAWTKWSATRYN      | TATATGGAAAGACC           |
| M0013 |            | 0.90715 |      |     |                     |                          |
| 7     | V\$OCT1_03 | 1       | 6338 | (+) | NNNRTAATNANNN       | GACCTAATGACAT            |
| M0016 |            | 0.91523 |      |     |                     |                          |
| 2     | V\$OCT1_06 | 4       | 6340 | (+) | CWNAWTKWSATRYN      | CCTAATGACATATT           |
| M0016 |            | 0.82929 |      |     |                     |                          |
| 2     | V\$OCT1_06 | 7       | 6341 | (-) | CWNAWTKWSATRYN      | CTAATGACATATTT           |
| M0013 |            | 0.78018 |      |     |                     |                          |
| 6     | V\$OCT1_02 | 4       | 6342 | (-) | NNGAATATKCANNNN     | TAATGACATATTTTT          |
| M0013 |            | 0.80280 |      |     | NNNNNNNWATGCAAATNNN |                          |
| 8     | V\$OCT1_04 | 2       | 6343 | (+) | WNNW                | AATGACATATTTTTATAATTGCA  |
| M0013 |            | 0.81723 |      |     | NNNNNNNWATGCAAATNNN |                          |
| 8     | V\$OCT1_04 | 1       | 6344 | (-) | WNNW                | ATGACATATTTTTATAATTGCAC  |
| M0013 |            | 0.76058 |      |     |                     |                          |
| 5     | V\$OCT1_01 | 8       | 6346 | (-) | NNNNWTATGCAAATNTNNN | GACATATTTTTATAATTGC      |
| M0016 |            | 0.82265 |      |     |                     |                          |
| 2     | V\$OCT1_06 | 6       | 6348 | (+) | CWNAWTKWSATRYN      | CATATTTTTATAAT           |
| M0013 |            | 0.85420 |      |     |                     |                          |
| 7     | V\$OCT1_03 | 8       | 6349 | (-) | NNNRTAATNANNN       | ATATTTTTATAAT            |

|       |            |         |      |     |                      |                          |
|-------|------------|---------|------|-----|----------------------|--------------------------|
| M0013 |            | 0.85934 |      |     |                      |                          |
| 7     | V\$OCT1_03 | 4       | 6355 | (-) | NNNRTAATNANNN        | TTATAATTGCACA            |
| M0013 |            | 0.90438 |      |     |                      |                          |
| 7     | V\$OCT1_03 | 6       | 6364 | (+) | NNNRTAATNANNN        | CACATAATCAATA            |
| M0013 |            | 0.80907 |      |     | NNNNNNNNWATGCAAATNNN |                          |
| 8     | V\$OCT1_04 | 6       | 6375 | (+) | WNNW                 | TAGAATGGAGTCAAATAAAAAATA |
| M0013 |            | 0.79297 |      |     | NNNNNNNNWATGCAAATNNN |                          |
| 8     | V\$OCT1_04 | 4       | 6387 | (+) | WNNW                 | AAATAAAAAATAGAAAATTCCTT  |
| M0024 |            | 0.83654 |      |     |                      |                          |
| 8     | V\$OCT1_07 | 9       | 6388 | (-) | TNTATGNTAATT         | AATAAAAAATAGA            |
| M0013 |            | 0.80255 |      |     |                      |                          |
| 5     | V\$OCT1_01 | 6       | 6397 | (-) | NNNNWTATGCAAATNTNNN  | AGAAAATTCCTTACTGAT       |
| M0016 |            | 0.82148 |      |     |                      |                          |
| 2     | V\$OCT1_06 | 4       | 6399 | (-) | CWNAWTKWSATRYN       | AAAATTCCTTACT            |
| M0024 |            | 0.85478 |      |     |                      |                          |
| 8     | V\$OCT1_07 | 1       | 6401 | (-) | TNTATGNTAATT         | AATTCCTTACT              |
| M0016 |            | 0.87382 |      |     |                      |                          |
| 2     | V\$OCT1_06 | 8       | 6407 | (+) | CWNAWTKWSATRYN       | CTTACTGATATTTA           |
| M0013 |            | 0.78251 |      |     | NNNNNNNNWATGCAAATNNN |                          |
| 8     | V\$OCT1_04 | 8       | 6410 | (-) | WNNW                 | ACTGATATTTAACAGATAAAATT  |
| M0016 |            | 0.80859 |      |     |                      |                          |
| 2     | V\$OCT1_06 | 4       | 6413 | (-) | CWNAWTKWSATRYN       | GATATTTAACAGAT           |
| M0024 |            | 0.79245 |      |     |                      |                          |
| 8     | V\$OCT1_07 | 3       | 6416 | (-) | TNTATGNTAATT         | ATTTAACAGATA             |
| M0016 |            | 0.81757 |      |     |                      |                          |
| 2     | V\$OCT1_06 | 8       | 6422 | (-) | CWNAWTKWSATRYN       | CAGATAAAATTAAG           |
| M0013 |            | 0.80677 |      |     | NNNNNNNNWATGCAAATNNN |                          |
| 8     | V\$OCT1_04 | 5       | 6437 | (+) | WNNW                 | TGAAAAAAATCCAAAATATACAT  |
| M0019 |            | 0.81086 |      |     |                      |                          |
| 5     | V\$OCT1_Q6 | 2       | 6441 | (+) | NNNNATGCAAATNAN      | AAAAATCCAAAATAT          |
| M0016 |            | 0.88281 |      |     |                      |                          |
| 2     | V\$OCT1_06 | 2       | 6442 | (-) | CWNAWTKWSATRYN       | AAAATCCAAAATAT           |
| M0013 |            |         |      |     |                      |                          |
| 6     | V\$OCT1_02 | 0.7902  | 6448 | (+) | NNGAATATKCANNNN      | CAAAATATACATCCA          |
| M0016 |            | 0.86796 |      |     |                      |                          |
| 2     | V\$OCT1_06 | 9       | 6473 | (-) | CWNAWTKWSATRYN       | TACATCACTTTATT           |
| M0013 |            | 0.80426 |      |     | NNNNNNNNWATGCAAATNNN |                          |
| 8     | V\$OCT1_04 | 6       | 6479 | (-) | WNNW                 | ACTTTATTTTCTATTCTGATAT   |
| M0013 |            | 0.81095 |      |     | NNNNNNNNWATGCAAATNNN |                          |
| 8     | V\$OCT1_04 | 8       | 6484 | (+) | WNNW                 | ATTTTCTATTCTGATATAATTA   |
| M0013 |            |         |      |     |                      |                          |
| 7     | V\$OCT1_03 | 0.92335 | 6497 | (+) | NNNRTAATNANNN        | GATATAATTAGGT            |
| M0013 |            | 0.87988 |      |     |                      |                          |
| 7     | V\$OCT1_03 | 9       | 6498 | (-) | NNNRTAATNANNN        | ATATAATTAGGTT            |
| M0016 |            | 0.83476 |      |     |                      |                          |
| 2     | V\$OCT1_06 | 6       | 6544 | (+) | CWNAWTKWSATRYN       | GTAAATAAAATTTG           |
| M0013 |            | 0.78168 |      |     | NNNNNNNNWATGCAAATNNN |                          |
| 8     | V\$OCT1_04 | 1       | 6546 | (-) | WNNW                 | AAATAAAATTTGTAAACAATTAC  |
| M0013 |            | 0.73349 |      |     |                      |                          |
| 5     | V\$OCT1_01 | 9       | 6548 | (-) | NNNNWTATGCAAATNTNNN  | ATAAAATTTGTAAACAATT      |
| M0013 |            | 0.85736 |      |     |                      |                          |
| 7     | V\$OCT1_03 | 9       | 6554 | (+) | NNNRTAATNANNN        | TTTGTAAACAATT            |
| M0013 |            | 0.87159 |      |     |                      |                          |
| 7     | V\$OCT1_03 | 2       | 6559 | (-) | NNNRTAATNANNN        | AAACAATTACAAA            |
| M0016 |            | 0.86289 |      |     |                      |                          |
| 2     | V\$OCT1_06 | 1       | 6560 | (+) | CWNAWTKWSATRYN       | AACAATTACAAACA           |
| M0013 |            | 0.83312 |      |     | NNNNNNNNWATGCAAATNNN |                          |
| 8     | V\$OCT1_04 | 4       | 6576 | (+) | WNNW                 | TGGTGAGAATACATATATATATA  |
| M0013 |            | 0.80928 |      |     | NNNNNNNNWATGCAAATNNN |                          |
| 8     | V\$OCT1_04 | 5       | 6578 | (+) | WNNW                 | GTGAGAATACATATATATATACA  |
| M0013 |            |         |      |     | NNNNNNNNWATGCAAATNNN |                          |
| 8     | V\$OCT1_04 | 0.7844  | 6580 | (+) | WNNW                 | GAGAATACATATATATATACATA  |
| M0013 |            | 0.84378 |      |     | NNNNNNNNWATGCAAATNNN |                          |
| 8     | V\$OCT1_04 | 9       | 6581 | (-) | WNNW                 | AGAATACATATATATATACATAT  |
| M0013 |            | 0.84901 |      |     | NNNNNNNNWATGCAAATNNN |                          |
| 8     | V\$OCT1_04 | 7       | 6582 | (+) | WNNW                 | GAATACATATATATATACATATA  |

|       |            |         |      |     |                     |                         |
|-------|------------|---------|------|-----|---------------------|-------------------------|
| M0013 |            | 0.82162 |      |     | NNNNNNNWATGCAAATNNN |                         |
| 8     | V\$OCT1_04 | 3       | 6583 | (-) | WNNW                | AATACATATATATACATATAA   |
| M0013 |            | 0.78837 |      |     | NNNNNNNWATGCAAATNNN |                         |
| 8     | V\$OCT1_04 | 3       | 6584 | (+) | WNNW                | ATACATATATATATACATATAAA |
| M0013 |            | 0.79694 |      |     | NNNNNNNWATGCAAATNNN |                         |
| 8     | V\$OCT1_04 | 7       | 6586 | (+) | WNNW                | ACATATATATATACATATAAATA |
| M0013 |            | 0.87641 |      |     | NNNNNNNWATGCAAATNNN |                         |
| 8     | V\$OCT1_04 | 2       | 6587 | (-) | WNNW                | CATATATATATACATATAAATAT |
| M0016 |            | 0.81718 |      |     |                     |                         |
| 2     | V\$OCT1_06 | 7       | 6587 | (+) | CWNAWTKWSATRYN      | CATATATATATACA          |
| M0013 |            | 0.86093 |      |     | NNNNNNNWATGCAAATNNN |                         |
| 8     | V\$OCT1_04 | 7       | 6588 | (+) | WNNW                | ATATATATATACATATAAATATG |
| M0013 |            | 0.78309 |      |     |                     |                         |
| 5     | V\$OCT1_01 | 8       | 6589 | (-) | NNNNWTATGCAAATNTNNN | TATATATATACATATAAAT     |
| M0013 |            | 0.73273 |      |     |                     |                         |
| 5     | V\$OCT1_01 | 6       | 6590 | (+) | NNNNWTATGCAAATNTNNN | ATATATATACATATAAATA     |
| M0013 |            | 0.78356 |      |     | NNNNNNNWATGCAAATNNN |                         |
| 8     | V\$OCT1_04 | 3       | 6590 | (+) | WNNW                | ATATATATACATATAAATATGAA |
| M0016 |            | 0.81171 |      |     |                     |                         |
| 2     | V\$OCT1_06 | 9       | 6591 | (+) | CWNAWTKWSATRYN      | TATATATACATATA          |
| M0013 |            | 0.84023 |      |     | NNNNNNNWATGCAAATNNN |                         |
| 8     | V\$OCT1_04 | 4       | 6592 | (+) | WNNW                | ATATATACATATAAATATGAAAA |
| M0013 |            | 0.79723 |      |     |                     |                         |
| 6     | V\$OCT1_02 | 9       | 6593 | (-) | NNGAATATKCANNNN     | TATATACATATAAAT         |
| M0013 |            | 0.84190 |      |     | NNNNNNNWATGCAAATNNN |                         |
| 8     | V\$OCT1_04 | 7       | 6593 | (-) | WNNW                | TATATACATATAAATATGAAAAA |
| M0013 |            | 0.74742 |      |     |                     |                         |
| 5     | V\$OCT1_01 | 5       | 6594 | (+) | NNNNWTATGCAAATNTNNN | ATATACATATAAATATGAA     |
| M0013 |            | 0.84086 |      |     | NNNNNNNWATGCAAATNNN |                         |
| 8     | V\$OCT1_04 | 2       | 6594 | (+) | WNNW                | ATATACATATAAATATGAAAAAA |
| M0019 |            | 0.79885 |      |     |                     |                         |
| 5     | V\$OCT1_Q6 | 4       | 6596 | (+) | NNNNATGCAAATNAN     | ATACATATAAATATG         |
| M0016 |            | 0.91523 |      |     |                     |                         |
| 2     | V\$OCT1_06 | 4       | 6597 | (-) | CWNAWTKWSATRYN      | TACATATAAATATG          |
| M0013 |            | 0.85381 |      |     |                     |                         |
| 7     | V\$OCT1_03 | 3       | 6599 | (+) | NNNRTAATNANNN       | CATATAAATATGA           |
| M0013 |            | 0.82350 |      |     | NNNNNNNWATGCAAATNNN |                         |
| 8     | V\$OCT1_04 | 5       | 6599 | (-) | WNNW                | CATATAAATATGAAAAAATATGT |
| M0013 |            | 0.89084 |      |     | NNNNNNNWATGCAAATNNN |                         |
| 8     | V\$OCT1_04 | 1       | 6600 | (+) | WNNW                | ATATAAATATGAAAAAATATGTA |
| M0013 |            | 0.82792 |      |     |                     |                         |
| 5     | V\$OCT1_01 | 8       | 6602 | (+) | NNNNWTATGCAAATNTNNN | ATAAATATGAAAAAATATG     |
| M0013 |            | 0.80969 |      |     |                     |                         |
| 6     | V\$OCT1_02 | 1       | 6602 | (+) | NNGAATATKCANNNN     | ATAAATATGAAAAAA         |
| M0016 |            | 0.86796 |      |     |                     |                         |
| 2     | V\$OCT1_06 | 9       | 6605 | (-) | CWNAWTKWSATRYN      | AATATGAAAAAATA          |
| M0013 |            | 0.78879 |      |     | NNNNNNNWATGCAAATNNN |                         |
| 8     | V\$OCT1_04 | 1       | 6609 | (-) | WNNW                | TGAAAAAATATGTACGTATTTTT |
| M0013 |            | 0.73273 |      |     |                     |                         |
| 5     | V\$OCT1_01 | 6       | 6612 | (+) | NNNNWTATGCAAATNTNNN | AAAAATATGTACGTATTTTT    |
| M0013 |            | 0.83730 |      |     |                     |                         |
| 6     | V\$OCT1_02 | 4       | 6612 | (+) | NNGAATATKCANNNN     | AAAAATATGTACGTA         |
| M0016 |            | 0.85507 |      |     |                     |                         |
| 2     | V\$OCT1_06 | 8       | 6615 | (-) | CWNAWTKWSATRYN      | AATATGTACGTATT          |
| M0016 |            | 0.82109 |      |     |                     |                         |
| 2     | V\$OCT1_06 | 4       | 6624 | (+) | CWNAWTKWSATRYN      | GTATTTTTCTGTG           |
| M0013 |            | 0.80489 |      |     | NNNNNNNWATGCAAATNNN |                         |
| 8     | V\$OCT1_04 | 3       | 6644 | (+) | WNNW                | GTATGTTTGTGCAGAGTATGCCA |
| M0013 |            | 0.76535 |      |     |                     |                         |
| 5     | V\$OCT1_01 | 7       | 6655 | (+) | NNNNWTATGCAAATNTNNN | CAGAGTATGCCAAAGCTCT     |
| M0013 |            | 0.80292 |      |     |                     |                         |
| 6     | V\$OCT1_02 | 4       | 6655 | (+) | NNGAATATKCANNNN     | CAGAGTATGCCAAAG         |
| M0016 |            | 0.87773 |      |     |                     |                         |
| 2     | V\$OCT1_06 | 4       | 6658 | (-) | CWNAWTKWSATRYN      | AGTATGCCAAAGCT          |
| M0016 |            | 0.91171 |      |     |                     |                         |
| 2     | V\$OCT1_06 | 9       | 6672 | (+) | CWNAWTKWSATRYN      | CTCTATGAGATTG           |

|       |             |         |      |     |                     |                         |
|-------|-------------|---------|------|-----|---------------------|-------------------------|
| M0016 |             | 0.81328 |      |     |                     |                         |
| 2     | V\$OCT1_06  | 1       | 6679 | (+) | CWNAWTKWSATRYN      | AGATTGTCTTATT           |
| M0016 |             | 0.80156 |      |     |                     |                         |
| 2     | V\$OCT1_06  | 2       | 6687 | (+) | CWNAWTKWSATRYN      | CTTATTGTTGTACT          |
| M0016 |             | 0.80585 |      |     |                     |                         |
| 2     | V\$OCT1_06  | 9       | 6696 | (+) | CWNAWTKWSATRYN      | GTACTTCTAATATG          |
| M0013 |             | 0.78690 |      |     | NNNNNNN             | WATGCAAATNNN            |
| 8     | V\$OCT1_04  | 9       | 6698 | (-) | WNNW                | ACTTCTAATATGCAACATTACT  |
| M0013 |             | 0.80866 |      |     |                     |                         |
| 5     | V\$OCT1_01  | 1       | 6701 | (+) | NNNNWTATGCAAATNTNNN | TCTAATATGCAACATTTAC     |
| M0013 |             | 0.87655 |      |     |                     |                         |
| 6     | V\$OCT1_02  | 7       | 6701 | (+) | NNGAATATKCANNNN     | TCTAATATGCAACAT         |
| M0016 |             | 0.84218 |      |     |                     |                         |
| 2     | V\$OCT1_06  | 7       | 6704 | (-) | CWNAWTKWSATRYN      | AATATGCAACATTT          |
| M0016 |             | 0.80820 |      |     |                     |                         |
| 2     | V\$OCT1_06  | 3       | 6733 | (-) | CWNAWTKWSATRYN      | TATGTGCCAAGCTC          |
| M0019 |             | 0.82751 |      |     |                     |                         |
| 5     | V\$OCT1_Q6  | 1       | 6755 | (-) | NNNNATGCAAATNAN     | GTGGTTTACATTATG         |
| M0016 |             | 0.80429 |      |     |                     |                         |
| 2     | V\$OCT1_06  | 7       | 6756 | (-) | CWNAWTKWSATRYN      | TGGTTTACATTATG          |
| M0013 |             | 0.80384 |      |     | NNNNNNN             | WATGCAAATNNN            |
| 8     | V\$OCT1_04  | 8       | 6758 | (-) | WNNW                | GTTTACATTATGAATTATCTTAC |
| M0013 |             | 0.88976 |      |     |                     |                         |
| 7     | V\$OCT1_03  | 7       | 6759 | (-) | NNNR                | TAAATNANNN              |
| M0016 |             | 0.84218 |      |     |                     |                         |
| 2     | V\$OCT1_06  | 7       | 6763 | (+) | CWNAWTKWSATRYN      | CATTATGAATTATC          |
| M0013 |             | 0.84271 |      |     |                     |                         |
| 6     | V\$OCT1_02  | 8       | 6764 | (-) | NNGAATATKCANNNN     | ATTATGAATTATCTT         |
| M0013 |             |         |      |     | NNNNNNN             | WATGCAAATNNN            |
| 8     | V\$OCT1_04  | 0.81284 | 6768 | (-) | WNNW                | TGAATTATCTTACCTAATTTTTT |
| M0022 |             | 0.81774 |      |     |                     |                         |
| 3     | V\$STAT_01  | 6       | 332  | (+) | TTCCCRKAA           | TTCTCTTA                |
| M0022 |             | 0.72995 |      |     | NNNSANTTCCGG-       |                         |
| 4     | V\$STAT1_01 | 2       | 558  | (+) | GAANTGNSN           | GCTAACTTCTCAGAAAGATGA   |
| M0022 |             | 0.93899 |      |     |                     |                         |
| 3     | V\$STAT_01  | 7       | 564  | (+) | TTCCCRKAA           | TTCTCAGAA               |
| M0022 |             | 0.90244 |      |     |                     |                         |
| 3     | V\$STAT_01  | 5       | 564  | (-) | TTCCCRKAA           | TTCTCAGAA               |
| M0022 |             | 0.79606 |      |     |                     |                         |
| 3     | V\$STAT_01  | 8       | 657  | (+) | TTCCCRKAA           | TTACGGTAT               |
| M0022 |             | 0.83261 |      |     |                     |                         |
| 3     | V\$STAT_01  | 9       | 657  | (-) | TTCCCRKAA           | TTACGGTAT               |
| M0022 |             | 0.80136 |      |     |                     |                         |
| 3     | V\$STAT_01  | 1       | 733  | (+) | TTCCCRKAA           | TTCCATCA                |
| M0022 |             | 0.83488 |      |     |                     |                         |
| 3     | V\$STAT_01  | 8       | 800  | (+) | TTCCCRKAA           | TTATGCTAA               |
| M0022 |             | 0.81925 |      |     |                     |                         |
| 3     | V\$STAT_01  | 9       | 800  | (-) | TTCCCRKAA           | TTATGCTAA               |
| M0022 |             | 0.80589 |      |     |                     |                         |
| 3     | V\$STAT_01  | 9       | 1314 | (+) | TTCCCRKAA           | CTCTTGTA                |
| M0022 |             | 0.79959 |      |     |                     |                         |
| 3     | V\$STAT_01  | 7       | 1454 | (-) | TTCCCRKAA           | TTCTAAAAA               |
| M0022 |             | 0.85152 |      |     |                     |                         |
| 3     | V\$STAT_01  | 5       | 1682 | (+) | TTCCCRKAA           | TTCTGTTA                |
| M0022 |             | 0.83261 |      |     |                     |                         |
| 3     | V\$STAT_01  | 9       | 1741 | (-) | TTCCCRKAA           | TTATAGGTA               |
| M0022 |             | 0.81976 |      |     |                     |                         |
| 3     | V\$STAT_01  | 3       | 1828 | (+) | TTCCCRKAA           | TTCTCCAAA               |
| M0022 |             | 0.93244 |      |     |                     |                         |
| 3     | V\$STAT_01  | 3       | 2155 | (+) | TTCCCRKAA           | TTCTCTAA                |
| M0022 |             | 0.85354 |      |     |                     |                         |
| 3     | V\$STAT_01  | 2       | 2188 | (+) | TTCCCRKAA           | TTCTACAA                |
| M0022 |             | 0.83261 |      |     |                     |                         |
| 3     | V\$STAT_01  | 9       | 2295 | (-) | TTCCCRKAA           | TTATAGGTA               |
| M0022 |             | 0.83261 |      |     |                     |                         |
| 3     | V\$STAT_01  | 9       | 2311 | (+) | TTCCCRKAA           | TACCTATAA               |

|       |             |         |      |     |                            |                       |
|-------|-------------|---------|------|-----|----------------------------|-----------------------|
| M0022 |             | 0.83261 |      |     |                            |                       |
| 3     | V\$STAT_01  | 9       | 2334 | (-) | TTCCCRKAA                  | TTATAGGCA             |
| M0022 |             | 0.81673 |      |     |                            |                       |
| 3     | V\$STAT_01  | 8       | 2405 | (-) | TTCCCRKAA                  | TTCCAACAA             |
| M0022 |             | 0.79253 |      |     |                            |                       |
| 3     | V\$STAT_01  | 8       | 2482 | (-) | TTCCCRKAA                  | TTATAAAAA             |
| M0022 |             | 0.85858 |      |     |                            |                       |
| 3     | V\$STAT_01  | 3       | 2532 | (+) | TTCCCRKAA                  | TTCTGGTA              |
| M0022 |             |         |      |     |                            |                       |
| 3     | V\$STAT_01  | 0.85934 | 2675 | (+) | TTCCCRKAA                  | TACCCATAA             |
| M0022 |             | 0.79505 |      |     |                            |                       |
| 3     | V\$STAT_01  | 9       | 2835 | (+) | TTCCCRKAA                  | ATCCTGGCA             |
| M0022 |             | 0.81925 |      |     |                            |                       |
| 3     | V\$STAT_01  | 9       | 2985 | (+) | TTCCCRKAA                  | TTTTCATAA             |
| M0022 |             | 0.82682 |      |     |                            |                       |
| 3     | V\$STAT_01  | 1       | 3055 | (-) | TTCCCRKAA                  | TTCAAGAA              |
| M0022 |             | 0.81547 |      |     |                            |                       |
| 3     | V\$STAT_01  | 8       | 3106 | (+) | TTCCCRKAA                  | TTCTCATAT             |
| M0022 |             | 0.72912 |      |     | NNNSANTTCCGG-<br>GAANTGNSN |                       |
| 4     | V\$STAT1_01 | 9       | 3126 | (+) |                            | TATATTTTTGGGGAAAAACAA |
| M0022 |             | 0.86362 |      |     |                            |                       |
| 3     | V\$STAT_01  | 5       | 3132 | (-) | TTCCCRKAA                  | TTTGGGGAA             |
| M0022 |             |         |      |     |                            |                       |
| 3     | V\$STAT_01  | 0.80968 | 3286 | (+) | TTCCCRKAA                  | TTCTTAAAA             |
| M0022 |             |         |      |     |                            |                       |
| 3     | V\$STAT_01  | 0.88732 | 3352 | (+) | TTCCCRKAA                  | TTACCGTCA             |
| M0022 |             | 0.79606 |      |     |                            |                       |
| 3     | V\$STAT_01  | 8       | 3352 | (-) | TTCCCRKAA                  | TTACCGTCA             |
| M0022 |             | 0.88026 |      |     |                            |                       |
| 3     | V\$STAT_01  | 2       | 3388 | (+) | TTCCCRKAA                  | TTCCCAAAA             |
| M0022 |             | 0.80690 |      |     |                            |                       |
| 3     | V\$STAT_01  | 7       | 3388 | (-) | TTCCCRKAA                  | TTCCCAAAA             |
| M0022 |             | 0.81976 |      |     |                            |                       |
| 3     | V\$STAT_01  | 3       | 3524 | (+) | TTCCCRKAA                  | TTCTTTTAA             |
| M0022 |             |         |      |     |                            |                       |
| 3     | V\$STAT_01  | 0.79884 | 3747 | (+) | TTCCCRKAA                  | ATCTCCTAA             |
| M0022 |             | 0.82682 |      |     |                            |                       |
| 3     | V\$STAT_01  | 1       | 3841 | (+) | TTCCCRKAA                  | TTCTTTGAA             |
| M0022 |             | 0.81295 |      |     |                            |                       |
| 3     | V\$STAT_01  | 7       | 3971 | (+) | TTCCCRKAA                  | TTACTGGAG             |
| M0022 |             |         |      |     |                            |                       |
| 3     | V\$STAT_01  | 0.80968 | 4182 | (-) | TTCCCRKAA                  | TTGTAGTAA             |
| M0022 |             | 0.79304 |      |     |                            |                       |
| 3     | V\$STAT_01  | 3       | 4335 | (+) | TTCCCRKAA                  | TTCTTCAAA             |
| M0022 |             | 0.80262 |      |     |                            |                       |
| 3     | V\$STAT_01  | 2       | 4412 | (-) | TTCCCRKAA                  | TTAAGATAA             |
| M0022 |             | 0.85051 |      |     |                            |                       |
| 3     | V\$STAT_01  | 7       | 4427 | (+) | TTCCCRKAA                  | TTACTAGCA             |
| M0022 |             | 0.81547 |      |     |                            |                       |
| 3     | V\$STAT_01  | 8       | 4437 | (-) | TTCCCRKAA                  | TTATGAGAT             |
| M0022 |             | 0.81547 |      |     |                            |                       |
| 3     | V\$STAT_01  | 8       | 4659 | (-) | TTCCCRKAA                  | TTATGGTTA             |
| M0022 |             | 0.82682 |      |     |                            |                       |
| 3     | V\$STAT_01  | 1       | 4780 | (+) | TTCCCRKAA                  | TTCTTGAAA             |
| M0022 |             | 0.79253 |      |     |                            |                       |
| 3     | V\$STAT_01  | 8       | 4854 | (-) | TTCCCRKAA                  | TTATATTAA             |
| M0022 |             | 0.89513 |      |     |                            |                       |
| 3     | V\$STAT_01  | 5       | 4873 | (+) | TTCCCRKAA                  | TTATCAGAA             |
| M0022 |             | 0.89538 |      |     |                            |                       |
| 3     | V\$STAT_01  | 7       | 4873 | (-) | TTCCCRKAA                  | TTATCAGAA             |
| M0022 |             | 0.81976 |      |     |                            |                       |
| 3     | V\$STAT_01  | 3       | 4954 | (-) | TTCCCRKAA                  | TTAGAGAAA             |
| M0022 |             | 0.79253 |      |     |                            |                       |
| 3     | V\$STAT_01  | 8       | 5696 | (+) | TTCCCRKAA                  | TTAATATAA             |
| M0022 |             | 0.79052 |      |     |                            |                       |
| 3     | V\$STAT_01  | 2       | 5764 | (+) | TTCCCRKAA                  | TTCTTATTA             |

|        |             |         |      |     |                      |                        |
|--------|-------------|---------|------|-----|----------------------|------------------------|
| M0022  |             | 0.72657 |      |     | NGNNATTCCSG-         |                        |
| 5      | V\$STAT3_01 | 5       | 5768 | (-) | GAARTGNNN            | TATTACTTCTCTGAATCTCAC  |
| M0022  |             | 0.85354 |      |     |                      |                        |
| 3      | V\$STAT_01  | 2       | 5774 | (+) | TTCCCRKAA            | TTCTCTGAA              |
| M0022  |             | 0.83362 |      |     |                      |                        |
| 3      | V\$STAT_01  | 7       | 5774 | (-) | TTCCCRKAA            | TTCTCTGAA              |
| M0022  |             | 0.88858 |      |     |                      |                        |
| 3      | V\$STAT_01  | 1       | 6007 | (+) | TTCCCRKAA            | TTCTTCTAA              |
| M0022  |             | 0.79959 |      |     |                      |                        |
| 3      | V\$STAT_01  | 7       | 6010 | (-) | TTCCCRKAA            | TTCTAAAAA              |
| M0022  |             | 0.82253 |      |     |                      |                        |
| 3      | V\$STAT_01  | 6       | 6089 | (+) | TTCCCRKAA            | CTCTCAGAA              |
| M0022  |             | 0.81295 |      |     |                      |                        |
| 3      | V\$STAT_01  | 7       | 6102 | (+) | TTCCCRKAA            | GTACTGGAA              |
| M0022  |             | 0.81547 |      |     |                      |                        |
| 3      | V\$STAT_01  | 8       | 6190 | (+) | TTCCCRKAA            | TTCTCATAC              |
| M0022  |             | 0.72295 |      |     | NGNNATTCCSG-         |                        |
| 5      | V\$STAT3_01 | 4       | 6262 | (-) | GAARTGNNN            | CTTCTTTTATGAGAAAATAAAA |
| M0022  |             | 0.85858 |      |     |                      |                        |
| 3      | V\$STAT_01  | 3       | 6268 | (+) | TTCCCRKAA            | TTATGAGAA              |
| M0022  |             | 0.93193 |      |     |                      |                        |
| 3      | V\$STAT_01  | 8       | 6268 | (-) | TTCCCRKAA            | TTATGAGAA              |
| M0022  |             | 0.79253 |      |     |                      |                        |
| 3      | V\$STAT_01  | 8       | 6352 | (+) | TTCCCRKAA            | TTTTTATAA              |
| M0022  |             | 0.75942 |      |     | NNNSANTTCCGG-        |                        |
| 4      | V\$STAT1_01 | 7       | 6452 | (-) | GAANTGNSN            | ATATACATCCAGGAAGTCTCC  |
| M0022  |             | 0.73685 |      |     | NGNNATTCCSG-         |                        |
| 5      | V\$STAT3_01 | 7       | 6452 | (+) | GAARTGNNN            | ATATACATCCAGGAAGTCTCC  |
| M0022  |             | 0.76437 |      |     | NGNNATTCCSG-         |                        |
| 5      | V\$STAT3_01 | 4       | 6452 | (-) | GAARTGNNN            | ATATACATCCAGGAAGTCTCC  |
| M0022  |             | 0.85681 |      |     |                      |                        |
| 3      | V\$STAT_01  | 9       | 6458 | (-) | TTCCCRKAA            | ATCCAGGAA              |
| CSN151 |             |         |      |     |                      |                        |
| M0022  |             | 0.81472 |      |     |                      |                        |
| 3      | V\$STAT_01  | 1       | 7    | (+) | TTCCCRKAA            | TTCTTGGA               |
| M0022  |             | 0.91227 |      |     |                      |                        |
| 3      | V\$STAT_01  | 6       | 55   | (+) | TTCCCRKAA            | TTCTTAGAA              |
| M0022  |             | 0.83362 |      |     |                      |                        |
| 3      | V\$STAT_01  | 7       | 55   | (-) | TTCCCRKAA            | TTCTTAGAA              |
| M0022  |             | 0.83438 |      |     |                      |                        |
| 3      | V\$STAT_01  | 4       | 315  | (+) | TTCCCRKAA            | TTCCTATGA              |
| M0022  |             | 0.86866 |      |     |                      |                        |
| 3      | V\$STAT_01  | 6       | 479  | (+) | TTCCCRKAA            | TTATGGTAA              |
| M0022  |             | 0.93193 |      |     |                      |                        |
| 3      | V\$STAT_01  | 8       | 479  | (-) | TTCCCRKAA            | TTATGGTAA              |
| M0022  |             | 0.71716 |      |     |                      |                        |
| 5      | V\$STAT3_01 | 1       | 552  | (-) | NGNNATTCCSGGAARTGNNN | TTTGTTTTCATAGAAATAACA  |
| M0022  |             | 0.84345 |      |     |                      |                        |
| 3      | V\$STAT_01  | 9       | 558  | (+) | TTCCCRKAA            | TTCATAGAA              |
| M0022  |             | 0.79606 |      |     |                      |                        |
| 3      | V\$STAT_01  | 8       | 574  | (+) | TTCCCRKAA            | TTCTGGTAG              |
| M0022  |             | 0.82253 |      |     |                      |                        |
| 3      | V\$STAT_01  | 6       | 574  | (-) | TTCCCRKAA            | TTCTGGTAG              |
| M0022  |             | 0.80262 |      |     |                      |                        |
| 3      | V\$STAT_01  | 2       | 614  | (-) | TTCCCRKAA            | TTAGGTAA               |
| M0022  |             | 0.80841 |      |     |                      |                        |
| 3      | V\$STAT_01  | 9       | 904  | (+) | TTCCCRKAA            | TTTCCAGCA              |
| M0022  |             | 0.81673 |      |     |                      |                        |
| 3      | V\$STAT_01  | 8       | 946  | (+) | TTCCCRKAA            | TTAATGGAA              |
| M0022  |             | 0.81774 |      |     |                      |                        |
| 3      | V\$STAT_01  | 6       | 1229 | (-) | TTCCCRKAA            | TAAGAGGAA              |
| M0022  |             | 0.81774 |      |     |                      |                        |
| 3      | V\$STAT_01  | 6       | 1303 | (+) | TTCCCRKAA            | TTCCTCTGA              |
| M0022  |             | 0.81976 |      |     |                      |                        |
| 3      | V\$STAT_01  | 3       | 1346 | (+) | TTCCCRKAA            | TTACTTTAA              |

|       |             |         |      |     |                       |                       |
|-------|-------------|---------|------|-----|-----------------------|-----------------------|
| M0022 |             | 0.88807 |      |     |                       |                       |
| 3     | V\$STAT_01  | 7       | 1488 | (+) | TTCCCRKAA             | TTATCATAA             |
| M0022 |             | 0.85152 |      |     |                       |                       |
| 3     | V\$STAT_01  | 5       | 1488 | (-) | TTCCCRKAA             | TTATCATAA             |
| M0022 |             | 0.81673 |      |     |                       |                       |
| 3     | V\$STAT_01  | 8       | 1506 | (+) | TTCCCRKAA             | TTGTTGGAA             |
| M0022 |             | 0.86135 |      |     |                       |                       |
| 3     | V\$STAT_01  | 6       | 1547 | (+) | TTCCCRKAA             | TTATTATAA             |
| M0022 |             | 0.81547 |      |     |                       |                       |
| 3     | V\$STAT_01  | 8       | 1796 | (-) | TTCCCRKAA             | CTATGGTAA             |
| M0022 |             | 0.83287 |      |     |                       |                       |
| 3     | V\$STAT_01  | 1       | 2264 | (+) | TTCCCRKAA             | TTCCAGGCA             |
| M0022 |             | 0.85681 |      |     |                       |                       |
| 3     | V\$STAT_01  | 9       | 2264 | (-) | TTCCCRKAA             | TTCCAGGCA             |
| M0022 |             | 0.82682 |      |     |                       |                       |
| 3     | V\$STAT_01  | 1       | 2499 | (+) | TTCCCRKAA             | TTCTTCTCA             |
| M0022 |             |         |      |     |                       |                       |
| 3     | V\$STAT_01  | 0.8364  | 2502 | (+) | TTCCCRKAA             | TTCTCAAAA             |
| M0022 |             | 0.72863 |      |     |                       |                       |
| 4     | V\$STAT1_01 | 5       | 2631 | (-) | NNNSANTTCCGGGAANTGNSN | CCCCCATCCCTGGGATTCTCC |
| M0022 |             | 0.83287 |      |     |                       |                       |
| 3     | V\$STAT_01  | 1       | 2791 | (+) | TTCCCRKAA             | TTCCAGGCA             |
| M0022 |             | 0.85681 |      |     |                       |                       |
| 3     | V\$STAT_01  | 9       | 2791 | (-) | TTCCCRKAA             | TTCCAGGCA             |
| M0022 |             |         |      |     |                       |                       |
| 3     | V\$STAT_01  | 0.8606  | 2877 | (-) | TTCCCRKAA             | TGACAAGAA             |
| M0022 |             |         |      |     |                       |                       |
| 3     | V\$STAT_01  | 0.8606  | 3096 | (-) | TTCCCRKAA             | TGACAGTAA             |
| M0022 |             |         |      |     |                       |                       |
| 3     | V\$STAT_01  | 0.80968 | 3106 | (-) | TTCCCRKAA             | TTACAAAAA             |
| M0022 |             | 0.85152 |      |     |                       |                       |
| 3     | V\$STAT_01  | 5       | 3321 | (+) | TTCCCRKAA             | TTATGATAA             |
| M0022 |             | 0.88807 |      |     |                       |                       |
| 3     | V\$STAT_01  | 7       | 3321 | (-) | TTCCCRKAA             | TTATGATAA             |
| M0022 |             | 0.79959 |      |     |                       |                       |
| 3     | V\$STAT_01  | 7       | 3398 | (-) | TTCCCRKAA             | TTCTAAAAA             |
| M0022 |             | 0.82631 |      |     |                       |                       |
| 3     | V\$STAT_01  | 7       | 3603 | (+) | TTCCCRKAA             | TTAACAGAA             |
| M0022 |             | 0.80993 |      |     |                       |                       |
| 3     | V\$STAT_01  | 2       | 3603 | (-) | TTCCCRKAA             | TTAACAGAA             |
| M0022 |             | 0.87748 |      |     |                       |                       |
| 3     | V\$STAT_01  | 9       | 3662 | (+) | TTCCCRKAA             | TTCCAAGAA             |
| M0022 |             | 0.92941 |      |     |                       |                       |
| 3     | V\$STAT_01  | 8       | 3662 | (-) | TTCCCRKAA             | TTCCAAGAA             |
| M0022 |             | 0.80589 |      |     |                       |                       |
| 3     | V\$STAT_01  | 9       | 3672 | (+) | TTCCCRKAA             | TCACTGTAA             |
| M0022 |             | 0.82631 |      |     |                       |                       |
| 3     | V\$STAT_01  | 7       | 3696 | (-) | TTCCCRKAA             | TGATGATAA             |
| M0022 |             | 0.79581 |      |     |                       |                       |
| 3     | V\$STAT_01  | 5       | 3742 | (-) | TTCCCRKAA             | CTCTAGTAA             |
| M0022 |             | 0.80589 |      |     |                       |                       |
| 3     | V\$STAT_01  | 9       | 3925 | (+) | TTCCCRKAA             | TTACTGTAT             |
| M0022 |             | 0.80589 |      |     |                       |                       |
| 3     | V\$STAT_01  | 9       | 4037 | (-) | TTCCCRKAA             | TTACAAGAG             |
| M0022 |             | 0.81976 |      |     |                       |                       |
| 3     | V\$STAT_01  | 3       | 4133 | (+) | TTCCCRKAA             | TTACCCCAA             |
| M0022 |             | 0.84976 |      |     |                       |                       |
| 3     | V\$STAT_01  | 1       | 4530 | (-) | TTCCCRKAA             | CTACAGGAA             |
| M0022 |             | 0.76354 |      |     |                       |                       |
| 4     | V\$STAT1_01 | 4       | 4608 | (+) | NNNSANTTCCGGGAANTGNSN | TGTATTTTCTGGAAAAATCA  |
| M0022 |             |         |      |     |                       |                       |
| 3     | V\$STAT_01  | 0.8606  | 4614 | (+) | TTCCCRKAA             | TTTCTGGAA             |
| M0022 |             | 0.79203 |      |     |                       |                       |
| 3     | V\$STAT_01  | 4       | 4614 | (-) | TTCCCRKAA             | TTTCTGGAA             |
| M0022 |             |         |      |     |                       |                       |
| 3     | V\$STAT_01  | 0.81699 | 4615 | (+) | TTCCCRKAA             | TTCTGAAA              |



|       |             |         |      |     |                       |                       |
|-------|-------------|---------|------|-----|-----------------------|-----------------------|
| M0022 |             | 0.87017 |      |     |                       |                       |
| 3     | V\$STAT_01  | 9       | 4615 | (-) | TTCCCRKAA             | TTCTGGAAA             |
| M0022 |             | 0.81724 |      |     |                       |                       |
| 3     | V\$STAT_01  | 2       | 4829 | (+) | TTCCCRKAA             | TTCTCATTA             |
| M0022 |             | 0.79253 |      |     |                       |                       |
| 3     | V\$STAT_01  | 8       | 4990 | (+) | TTCCCRKAA             | TTAATATAA             |
| M0022 |             | 0.73275 |      |     |                       |                       |
| 4     | V\$STAT1_01 | 2       | 5012 | (+) | NNNSANTTCCGGGAANTGNSN | TAGCCTTTTCCAGAAGTGTTT |
| M0022 |             | 0.72089 |      |     |                       |                       |
| 4     | V\$STAT1_01 | 6       | 5012 | (-) | NNNSANTTCCGGGAANTGNSN | TAGCCTTTTCCAGAAGTGTTT |
| M0022 |             | 0.75177 |      |     |                       |                       |
| 5     | V\$STAT3_01 | 4       | 5012 | (+) | NGNNATTTCCSGGAARTGNNN | TAGCCTTTTCCAGAAGTGTTT |
| M0022 |             | 0.87017 |      |     |                       |                       |
| 3     | V\$STAT_01  | 9       | 5018 | (+) | TTCCCRKAA             | TTTCCAGAA             |
| M0022 |             |         |      |     |                       |                       |
| 3     | V\$STAT_01  | 0.81699 | 5018 | (-) | TTCCCRKAA             | TTTCCAGAA             |
| M0022 |             | 0.92941 |      |     |                       |                       |
| 3     | V\$STAT_01  | 8       | 5237 | (+) | TTCCCRKAA             | TTACTGGAA             |
| M0022 |             | 0.88757 |      |     |                       |                       |
| 3     | V\$STAT_01  | 2       | 5237 | (-) | TTCCCRKAA             | TTACTGGAA             |
| M0022 |             | 0.80589 |      |     |                       |                       |
| 3     | V\$STAT_01  | 9       | 5321 | (-) | TTCCCRKAA             | ATACAAGAA             |
| M0022 |             | 0.80060 |      |     |                       |                       |
| 3     | V\$STAT_01  | 5       | 5678 | (-) | TTCCCRKAA             | TAAGGAGAA             |
| M0022 |             | 0.79480 |      |     |                       |                       |
| 3     | V\$STAT_01  | 7       | 5799 | (-) | TTCCCRKAA             | TTGAGGGAA             |
| M0022 |             | 0.85354 |      |     |                       |                       |
| 3     | V\$STAT_01  | 2       | 5892 | (+) | TTCCCRKAA             | TTCATGTAA             |
| M0022 |             |         |      |     |                       |                       |
| 3     | V\$STAT_01  | 0.8243  | 5943 | (-) | TTCCCRKAA             | TACTGAGAA             |
| M0022 |             | 0.79253 |      |     |                       |                       |
| 3     | V\$STAT_01  | 8       | 6005 | (+) | TTCCCRKAA             | TTAGTATAA             |
| M0022 |             | 0.81295 |      |     |                       |                       |
| 3     | V\$STAT_01  | 7       | 6129 | (-) | TTCCCRKAA             | CTCCAAGAA             |
| M0022 |             | 0.86765 |      |     |                       |                       |
| 3     | V\$STAT_01  | 8       | 6298 | (+) | TTCCCRKAA             | TTCTTGGCA             |
| M0022 |             | 0.84471 |      |     |                       |                       |
| 3     | V\$STAT_01  | 9       | 6342 | (+) | TTCCCRKAA             | TTATTCTAA             |
| M0022 |             |         |      |     |                       |                       |
| 4     | V\$STAT1_01 | 0.72353 | 6361 | (+) | NNNSANTTCCGGGAANTGNSN | TATAATATAAGGGAAATAAAG |
| M0022 |             | 0.72860 |      |     |                       |                       |
| 5     | V\$STAT3_01 | 2       | 6361 | (-) | NGNNATTTCCSGGAARTGNNN | TATAATATAAGGGAAATAAAG |
| M0022 |             | 0.82682 |      |     |                       |                       |
| 3     | V\$STAT_01  | 1       | 6476 | (-) | TTCCCRKAA             | TTCAAAGAA             |
| M0007 |             | 0.80784 |      |     |                       |                       |
| 6     | V\$GATA2_01 | 8       | 40   | (-) | NNNGATRNNN            | TCCTATGTGA            |
| M0007 |             | 0.82082 |      |     |                       |                       |
| 5     | V\$GATA1_01 | 9       | 74   | (+) | SNNGATNNNN            | CCTGTTGGTT            |
| M0007 |             | 0.82280 |      |     |                       |                       |
| 5     | V\$GATA1_01 | 4       | 111  | (-) | SNNGATNNNN            | ACTAATCAGT            |
| M0007 |             | 0.78574 |      |     |                       |                       |
| 6     | V\$GATA2_01 | 7       | 111  | (-) | NNNGATRNNN            | ACTAATCAGT            |
| M0007 |             | 0.82454 |      |     |                       |                       |
| 7     | V\$GATA3_01 | 6       | 111  | (-) | NNGATARNG             | ACTAATCAG             |
| M0012 |             | 0.80450 |      |     |                       |                       |
| 7     | V\$GATA1_03 | 8       | 147  | (-) | RNSNNGATAANNNGN       | TCTGCCATCACCTT        |
| M0007 |             | 0.93632 |      |     |                       |                       |
| 5     | V\$GATA1_01 | 8       | 149  | (-) | SNNGATNNNN            | TGCCATCACC            |
| M0007 |             | 0.90302 |      |     |                       |                       |
| 6     | V\$GATA2_01 | 2       | 149  | (-) | NNNGATRNNN            | TGCCATCACC            |
| M0007 |             |         |      |     |                       |                       |
| 7     | V\$GATA3_01 | 0.85113 | 149  | (-) | NNGATARNG             | TGCCATCAC             |
| M0007 |             | 0.78035 |      |     |                       |                       |
| 5     | V\$GATA1_01 | 5       | 158  | (+) | SNNGATNNNN            | CTTGATCATC            |
| M0007 |             | 0.79861 |      |     |                       |                       |
| 5     | V\$GATA1_01 | 8       | 158  | (-) | SNNGATNNNN            | CTTGATCATC            |

|       |             |         |     |     |                |                |
|-------|-------------|---------|-----|-----|----------------|----------------|
| M0007 |             | 0.79115 |     |     |                |                |
| 6     | V\$GATA2_01 | 9       | 158 | (-) | NNNGATRNNN     | CTTGATCATC     |
| M0012 |             | 0.80083 |     |     |                |                |
| 7     | V\$GATA1_03 | 3       | 159 | (-) | RNSNNGATAANNGN | TTGATCATCAACCC |
| M0007 |             | 0.82724 |     |     |                |                |
| 5     | V\$GATA1_01 | 6       | 161 | (-) | SNNGATNNNN     | GATCATCAAC     |
| M0012 |             | 0.80083 |     |     |                |                |
| 7     | V\$GATA1_03 | 3       | 215 | (+) | RNSNNGATAANNGN | ATACATATAACAAA |
| M0007 |             | 0.80157 |     |     |                |                |
| 5     | V\$GATA1_01 | 9       | 234 | (+) | SNNGATNNNN     | TATGATTTTC     |
| M0007 |             | 0.81506 |     |     |                |                |
| 6     | V\$GATA2_01 | 5       | 234 | (+) | NNNGATRNNN     | TATGATTTTC     |
| M0007 |             | 0.79521 |     |     |                |                |
| 6     | V\$GATA2_01 | 9       | 249 | (-) | NNNGATRNNN     | TCTCATCTTT     |
| M0007 |             | 0.86575 |     |     |                |                |
| 7     | V\$GATA3_01 | 1       | 249 | (-) | NNGATARNG      | TCTCATCTT      |
| M0007 |             | 0.85636 |     |     |                |                |
| 5     | V\$GATA1_01 | 7       | 293 | (+) | SNNGATNNNN     | TGTGATTGCA     |
| M0007 |             | 0.85250 |     |     |                |                |
| 6     | V\$GATA2_01 | 3       | 293 | (+) | NNNGATRNNN     | TGTGATTGCA     |
| M0007 |             | 0.87106 |     |     |                |                |
| 7     | V\$GATA3_01 | 8       | 294 | (+) | NNGATARNG      | GTGATTGCA      |
| M0007 |             | 0.78845 |     |     |                |                |
| 6     | V\$GATA2_01 | 3       | 316 | (-) | NNNGATRNNN     | TCCTATGATA     |
| M0007 |             | 0.78578 |     |     |                |                |
| 5     | V\$GATA1_01 | 5       | 319 | (+) | SNNGATNNNN     | TATGATATAC     |
| M0007 |             | 0.83942 |     |     |                |                |
| 6     | V\$GATA2_01 | 3       | 319 | (+) | NNNGATRNNN     | TATGATATAC     |
| M0012 |             |         |     |     |                |                |
| 6     | V\$GATA1_02 | 0.8225  | 354 | (+) | NNNNNGATANKGNN | ATGTTGATACTATC |
| M0012 |             | 0.85668 |     |     |                |                |
| 7     | V\$GATA1_03 | 8       | 354 | (+) | RNSNNGATAANNGN | ATGTTGATACTATC |
| M0007 |             | 0.84600 |     |     |                |                |
| 5     | V\$GATA1_01 | 2       | 356 | (+) | SNNGATNNNN     | GTTGATACTA     |
| M0007 |             | 0.79747 |     |     |                |                |
| 6     | V\$GATA2_01 | 4       | 356 | (+) | NNNGATRNNN     | GTTGATACTA     |
| M0012 |             | 0.84437 |     |     |                |                |
| 6     | V\$GATA1_02 | 5       | 359 | (-) | NNNNNGATANKGNN | GATACTATCTATCT |
| M0012 |             | 0.86844 |     |     |                |                |
| 7     | V\$GATA1_03 | 7       | 359 | (-) | RNSNNGATAANNGN | GATACTATCTATCT |
| M0007 |             | 0.78627 |     |     |                |                |
| 5     | V\$GATA1_01 | 8       | 361 | (-) | SNNGATNNNN     | TACTATCTAT     |
| M0007 |             |         |     |     |                |                |
| 6     | V\$GATA2_01 | 0.7871  | 361 | (-) | NNNGATRNNN     | TACTATCTAT     |
| M0007 |             | 0.90252 |     |     |                |                |
| 7     | V\$GATA3_01 | 5       | 361 | (-) | NNGATARNG      | TACTATCTA      |
| M0020 |             | 0.85399 |     |     |                |                |
| 3     | V\$GATA_C   | 2       | 362 | (-) | NGATAAGNMNN    | ACTATCTATCT    |
| M0012 |             | 0.77093 |     |     |                |                |
| 6     | V\$GATA1_02 | 7       | 363 | (-) | NNNNNGATANKGNN | CTATCTATCTCAGA |
| M0012 |             | 0.83731 |     |     |                |                |
| 8     | V\$GATA1_04 | 6       | 363 | (-) | NNCWGATARNNNN  | CTATCTATCTCAG  |
| M0007 |             |         |     |     |                |                |
| 5     | V\$GATA1_01 | 0.85538 | 365 | (-) | SNNGATNNNN     | ATCTATCTCA     |
| M0007 |             | 0.89896 |     |     |                |                |
| 6     | V\$GATA2_01 | 3       | 365 | (-) | NNNGATRNNN     | ATCTATCTCA     |
| M0007 |             | 0.89233 |     |     |                |                |
| 7     | V\$GATA3_01 | 5       | 365 | (-) | NNGATARNG      | ATCTATCTC      |
| M0012 |             | 0.77937 |     |     |                |                |
| 6     | V\$GATA1_02 | 5       | 452 | (+) | NNNNNGATANKGNN | ATGTAGATACATAA |
| M0012 |             | 0.84100 |     |     |                |                |
| 7     | V\$GATA1_03 | 9       | 452 | (+) | RNSNNGATAANNGN | ATGTAGATACATAA |
| M0007 |             | 0.82132 |     |     |                |                |
| 5     | V\$GATA1_01 | 3       | 454 | (+) | SNNGATNNNN     | GTAGATACAT     |
| M0007 |             | 0.79837 |     |     |                |                |
| 6     | V\$GATA2_01 | 6       | 454 | (+) | NNNGATRNNN     | GTAGATACAT     |

|       |             |         |     |     |                 |                |
|-------|-------------|---------|-----|-----|-----------------|----------------|
| M0020 |             | 0.87791 |     |     |                 |                |
| 3     | V\$GATA_C   | 2       | 456 | (+) | NGATAAGNMNN     | AGATACATAAC    |
| M0012 |             | 0.81843 |     |     |                 |                |
| 6     | V\$GATA1_02 | 8       | 648 | (+) | NNNNNGATANKGNN  | TCAATGATAGACAA |
| M0007 |             | 0.82428 |     |     |                 |                |
| 5     | V\$GATA1_01 | 4       | 650 | (+) | SNNGATNNNN      | AATGATAGAC     |
| M0007 |             | 0.84348 |     |     |                 |                |
| 6     | V\$GATA2_01 | 2       | 650 | (+) | NNNGATRNNN      | AATGATAGAC     |
| M0007 |             | 0.85157 |     |     |                 |                |
| 7     | V\$GATA3_01 | 3       | 651 | (+) | NNGATARNG       | ATGATAGAC      |
| M0020 |             | 0.88474 |     |     |                 |                |
| 3     | V\$GATA_C   | 7       | 652 | (+) | NGATAAGNMNN     | TGATAGACAAT    |
| M0012 |             | 0.84160 |     |     |                 |                |
| 8     | V\$GATA1_04 | 5       | 661 | (+) | NNCWGATARNNNN   | ATTAGATATAAAT  |
| M0007 |             | 0.82233 |     |     |                 |                |
| 7     | V\$GATA3_01 | 1       | 663 | (+) | NNGATARNG       | TAGATATAA      |
| M0020 |             | 0.83504 |     |     |                 |                |
| 3     | V\$GATA_C   | 2       | 664 | (+) | NGATAAGNMNN     | AGATATAAATG    |
| M0012 |             | 0.78466 |     |     |                 |                |
| 7     | V\$GATA1_03 | 4       | 684 | (+) | RNSNNGATAANNNGN | ATAAAGATGATTAA |
| M0007 |             | 0.79269 |     |     |                 |                |
| 5     | V\$GATA1_01 | 5       | 686 | (+) | SNNGATNNNN      | AAAGATGATT     |
| M0007 |             | 0.81867 |     |     |                 |                |
| 6     | V\$GATA2_01 | 4       | 686 | (+) | NNNGATRNNN      | AAAGATGATT     |
| M0007 |             | 0.77936 |     |     |                 |                |
| 5     | V\$GATA1_01 | 8       | 689 | (+) | SNNGATNNNN      | GATGATTAAA     |
| M0007 |             | 0.82144 |     |     |                 |                |
| 7     | V\$GATA3_01 | 4       | 690 | (+) | NNGATARNG       | ATGATTAAA      |
| M0007 |             | 0.77887 |     |     |                 |                |
| 5     | V\$GATA1_01 | 5       | 700 | (+) | SNNGATNNNN      | TTGGATATTT     |
| M0007 |             | 0.82724 |     |     |                 |                |
| 6     | V\$GATA2_01 | 4       | 700 | (+) | NNNGATRNNN      | TTGGATATTT     |
| M0012 |             | 0.78218 |     |     |                 |                |
| 6     | V\$GATA1_02 | 8       | 710 | (+) | NNNNNGATANKGNN  | GTAAGGATACAAAT |
| M0012 |             | 0.80720 |     |     |                 |                |
| 7     | V\$GATA1_03 | 2       | 710 | (+) | RNSNNGATAANNNGN | GTAAGGATACAAAT |
| M0007 |             | 0.81777 |     |     |                 |                |
| 6     | V\$GATA2_01 | 2       | 712 | (+) | NNNGATRNNN      | AAGGATACAA     |
| M0020 |             | 0.86455 |     |     |                 |                |
| 3     | V\$GATA_C   | 4       | 714 | (+) | NGATAAGNMNN     | GGATACAAATA    |
| M0007 |             | 0.80157 |     |     |                 |                |
| 5     | V\$GATA1_01 | 9       | 782 | (+) | SNNGATNNNN      | GTAGATTCTA     |
| M0007 |             | 0.78973 |     |     |                 |                |
| 5     | V\$GATA1_01 | 3       | 821 | (-) | SNNGATNNNN      | AATAATCTGT     |
| M0007 |             | 0.79070 |     |     |                 |                |
| 6     | V\$GATA2_01 | 8       | 821 | (-) | NNNGATRNNN      | AATAATCTGT     |
| M0007 |             | 0.82720 |     |     |                 |                |
| 7     | V\$GATA3_01 | 4       | 821 | (-) | NNGATARNG       | AATAATCTG      |
| M0007 |             | 0.84049 |     |     |                 |                |
| 7     | V\$GATA3_01 | 6       | 868 | (-) | NNGATARNG       | TATAATCTA      |
| M0012 |             | 0.79446 |     |     |                 |                |
| 7     | V\$GATA1_03 | 3       | 880 | (-) | RNSNNGATAANNNGN | TTTCTTATGTATCT |
| M0020 |             | 0.85119 |     |     |                 |                |
| 3     | V\$GATA_C   | 6       | 883 | (-) | NGATAAGNMNN     | CTTATGTATCT    |
| M0012 |             | 0.77312 |     |     |                 |                |
| 6     | V\$GATA1_02 | 5       | 884 | (-) | NNNNNGATANKGNN  | TTATGTATCTGAAA |
| M0012 |             | 0.83976 |     |     |                 |                |
| 8     | V\$GATA1_04 | 7       | 884 | (-) | NNCWGATARNNNN   | TTATGTATCTGAA  |
| M0007 |             | 0.82181 |     |     |                 |                |
| 5     | V\$GATA1_01 | 6       | 886 | (-) | SNNGATNNNN      | ATGTATCTGA     |
| M0007 |             | 0.87370 |     |     |                 |                |
| 6     | V\$GATA2_01 | 3       | 886 | (-) | NNNGATRNNN      | ATGTATCTGA     |
| M0012 |             | 0.78593 |     |     |                 |                |
| 6     | V\$GATA1_02 | 8       | 967 | (+) | NNNNNGATANKGNN  | AACGTGATATGTTT |
| M0012 |             | 0.83486 |     |     |                 |                |
| 8     | V\$GATA1_04 | 5       | 968 | (+) | NNCWGATARNNNN   | ACGTGATATGTTT  |

|       |             |         |      |     |                |                |
|-------|-------------|---------|------|-----|----------------|----------------|
| M0007 |             | 0.94175 |      |     |                |                |
| 5     | V\$GATA1_01 | 7       | 969  | (+) | SNNGATNNNN     | CGTGATATGT     |
| M0007 |             | 0.90663 |      |     |                |                |
| 6     | V\$GATA2_01 | 1       | 969  | (+) | NNNGATRNNN     | CGTGATATGT     |
| M0007 |             | 0.84935 |      |     |                |                |
| 7     | V\$GATA3_01 | 8       | 970  | (+) | NNGATARNG      | GTGATATGT      |
| M0007 |             | 0.84896 |      |     |                |                |
| 5     | V\$GATA1_01 | 3       | 985  | (+) | SNNGATNNNN     | TATGATTCTG     |
| M0007 |             | 0.84303 |      |     |                |                |
| 6     | V\$GATA2_01 | 1       | 985  | (+) | NNNGATRNNN     | TATGATTCTG     |
| M0007 |             | 0.82543 |      |     |                |                |
| 7     | V\$GATA3_01 | 2       | 986  | (+) | NNGATARNG      | ATGATTCTG      |
| M0007 |             | 0.77936 |      |     |                |                |
| 5     | V\$GATA1_01 | 8       | 995  | (-) | SNNGATNNNN     | TTTAATCATC     |
| M0007 |             | 0.82144 |      |     |                |                |
| 7     | V\$GATA3_01 | 4       | 995  | (-) | NNGATARNG      | TTTAATCAT      |
| M0012 |             | 0.81749 |      |     |                |                |
| 7     | V\$GATA1_03 | 1       | 996  | (-) | RNSNNGATAANNGN | TTAATCATCTTCAT |
| M0007 |             | 0.85735 |      |     |                |                |
| 5     | V\$GATA1_01 | 4       | 998  | (-) | SNNGATNNNN     | AATCATCTTC     |
| M0007 |             | 0.86558 |      |     |                |                |
| 6     | V\$GATA2_01 | 4       | 998  | (-) | NNNGATRNNN     | AATCATCTTC     |
| M0020 |             | 0.87884 |      |     |                |                |
| 3     | V\$GATA_C   | 4       | 1022 | (-) | NGATAAGNMNN    | TGGATATATCA    |
| M0012 |             | 0.81035 |      |     |                |                |
| 8     | V\$GATA1_04 | 5       | 1023 | (-) | NNCWGATARNNNN  | GGATATATCAACC  |
| M0020 |             | 0.86206 |      |     |                |                |
| 3     | V\$GATA_C   | 9       | 1023 | (+) | NGATAAGNMNN    | GGATATATCAA    |
| M0007 |             | 0.82082 |      |     |                |                |
| 5     | V\$GATA1_01 | 9       | 1025 | (-) | SNNGATNNNN     | ATATATCAAC     |
| M0007 |             | 0.81391 |      |     |                |                |
| 5     | V\$GATA1_01 | 9       | 1055 | (+) | SNNGATNNNN     | CTAGATCCTT     |
| M0007 |             | 0.78484 |      |     |                |                |
| 6     | V\$GATA2_01 | 4       | 1055 | (-) | NNNGATRNNN     | CTAGATCCTT     |
| M0012 |             | 0.77812 |      |     |                |                |
| 6     | V\$GATA1_02 | 5       | 1091 | (+) | NNNNNGATANKGNN | TTCTACATAATGCA |
| M0012 |             | 0.80548 |      |     |                |                |
| 7     | V\$GATA1_03 | 8       | 1132 | (+) | RNSNNGATAANNGN | AGCAGGCTAAAGGA |
| M0012 |             |         |      |     |                |                |
| 6     | V\$GATA1_02 | 0.79375 | 1139 | (+) | NNNNNGATANKGNN | TAAAGGATAAAGAC |
| M0012 |             |         |      |     |                |                |
| 8     | V\$GATA1_04 | 0.86489 | 1140 | (+) | NNCWGATARNNNN  | AAAGGATAAAGAC  |
| M0007 |             | 0.83446 |      |     |                |                |
| 6     | V\$GATA2_01 | 1       | 1141 | (+) | NNNGATRNNN     | AAGGATAAAG     |
| M0007 |             | 0.86840 |      |     |                |                |
| 7     | V\$GATA3_01 | 9       | 1142 | (+) | NNGATARNG      | AGGATAAAG      |
| M0020 |             | 0.94874 |      |     |                |                |
| 3     | V\$GATA_C   | 2       | 1143 | (+) | NGATAAGNMNN    | GGATAAAGACA    |
| M0012 |             | 0.82812 |      |     |                |                |
| 6     | V\$GATA1_02 | 5       | 1164 | (+) | NNNNNGATANKGNN | TTACAGATATTAAA |
| M0012 |             | 0.84436 |      |     |                |                |
| 8     | V\$GATA1_04 | 3       | 1165 | (+) | NNCWGATARNNNN  | TACAGATATTAAA  |
| M0007 |             |         |      |     |                |                |
| 5     | V\$GATA1_01 | 0.79615 | 1166 | (+) | SNNGATNNNN     | ACAGATATTA     |
| M0007 |             | 0.84032 |      |     |                |                |
| 6     | V\$GATA2_01 | 5       | 1166 | (+) | NNNGATRNNN     | ACAGATATTA     |
| M0007 |             | 0.86087 |      |     |                |                |
| 7     | V\$GATA3_01 | 7       | 1167 | (+) | NNGATARNG      | CAGATATTA      |
| M0020 |             | 0.88257 |      |     |                |                |
| 3     | V\$GATA_C   | 2       | 1197 | (-) | NGATAAGNMNN    | TTAGTTTATCA    |
| M0012 |             |         |      |     |                |                |
| 6     | V\$GATA1_02 | 0.8125  | 1198 | (-) | NNNNNGATANKGNN | TAGTTTATCAATTT |
| M0012 |             | 0.82190 |      |     |                |                |
| 7     | V\$GATA1_03 | 1       | 1198 | (-) | RNSNNGATAANNGN | TAGTTTATCAATTT |
| M0012 |             | 0.81556 |      |     |                |                |
| 8     | V\$GATA1_04 | 4       | 1198 | (-) | NNCWGATARNNNN  | TAGTTTATCAATT  |

|       |             |         |      |     |                |                 |
|-------|-------------|---------|------|-----|----------------|-----------------|
| M0007 |             | 0.81688 |      |     |                |                 |
| 5     | V\$GATA1_01 | 1       | 1288 | (+) | SNNGATNNNN     | ATTGATGCTT      |
| M0020 |             | 0.85865 |      |     |                |                 |
| 3     | V\$GATA_C   | 2       | 1309 | (+) | NGATAAGNMNN    | TGACAAAACCC     |
| M0012 |             |         |      |     |                |                 |
| 7     | V\$GATA1_03 | 0.78099 | 1318 | (-) | RNSNNGATAANNGN | CCTACTATTACTTT  |
| M0007 |             | 0.78529 |      |     |                |                 |
| 5     | V\$GATA1_01 | 1       | 1332 | (-) | SNNGATNNNN     | CAGGATCAAA      |
| M0012 |             | 0.81031 |      |     |                |                 |
| 6     | V\$GATA1_02 | 2       | 1360 | (+) | NNNNNGATANKGNN | AGTAAGATATTGGT  |
| M0012 |             | 0.86029 |      |     |                |                 |
| 8     | V\$GATA1_04 | 4       | 1361 | (+) | NNCWGATARNNNN  | GTAAGATATTGGT   |
| M0007 |             | 0.83070 |      |     |                |                 |
| 5     | V\$GATA1_01 | 1       | 1362 | (+) | SNNGATNNNN     | TAAGATATTG      |
| M0007 |             | 0.90753 |      |     |                |                 |
| 6     | V\$GATA2_01 | 3       | 1362 | (+) | NNNGATRNNN     | TAAGATATTG      |
| M0007 |             | 0.90163 |      |     |                |                 |
| 7     | V\$GATA3_01 | 9       | 1363 | (+) | NNGATARNG      | AAGATATTG       |
| M0020 |             | 0.97421 |      |     |                |                 |
| 3     | V\$GATA_C   | 6       | 1374 | (-) | NGATAAGNMNN    | ATTTCTTATCT     |
| M0012 |             |         |      |     |                |                 |
| 6     | V\$GATA1_02 | 0.84875 | 1375 | (-) | NNNNNGATANKGNN | TTTCTTATCTTATA  |
| M0012 |             | 0.94515 |      |     |                |                 |
| 8     | V\$GATA1_04 | 9       | 1375 | (-) | NNCWGATARNNNN  | TTTCTTATCTTAT   |
| M0007 |             | 0.77788 |      |     |                |                 |
| 5     | V\$GATA1_01 | 7       | 1377 | (-) | SNNGATNNNN     | TCTTATCTTA      |
| M0007 |             | 0.85611 |      |     |                |                 |
| 6     | V\$GATA2_01 | 2       | 1377 | (-) | NNNGATRNNN     | TCTTATCTTA      |
| M0007 |             | 0.91936 |      |     |                |                 |
| 7     | V\$GATA3_01 | 2       | 1377 | (-) | NNGATARNG      | TCTTATCTT       |
| M0020 |             | 0.83535 |      |     |                |                 |
| 3     | V\$GATA_C   | 3       | 1386 | (+) | NGATAAGNMNN    | ATATAAGCACT     |
| M0012 |             | 0.80181 |      |     |                |                 |
| 7     | V\$GATA1_03 | 3       | 1398 | (+) | RNSNNGATAANNGN | AGCAAAAATAATTTG |
| M0020 |             | 0.90680 |      |     |                |                 |
| 3     | V\$GATA_C   | 3       | 1483 | (-) | NGATAAGNMNN    | AACTTTTATCA     |
| M0012 |             | 0.82187 |      |     |                |                 |
| 6     | V\$GATA1_02 | 5       | 1484 | (-) | NNNNNGATANKGNN | ACTTTTATCATAAT  |
| M0012 |             | 0.82582 |      |     |                |                 |
| 7     | V\$GATA1_03 | 1       | 1484 | (-) | RNSNNGATAANNGN | ACTTTTATCATAAT  |
| M0012 |             | 0.91513 |      |     |                |                 |
| 8     | V\$GATA1_04 | 5       | 1484 | (-) | NNCWGATARNNNN  | ACTTTTATCATAA   |
| M0007 |             | 0.79837 |      |     |                |                 |
| 6     | V\$GATA2_01 | 6       | 1486 | (-) | NNNGATRNNN     | TTTTATCATA      |
| M0007 |             | 0.85511 |      |     |                |                 |
| 7     | V\$GATA3_01 | 7       | 1486 | (-) | NNGATARNG      | TTTTATCAT       |
| M0020 |             | 0.83845 |      |     |                |                 |
| 3     | V\$GATA_C   | 9       | 1550 | (+) | NGATAAGNMNN    | TTATAAGACCT     |
| M0007 |             |         |      |     |                |                 |
| 5     | V\$GATA1_01 | 0.78924 | 1580 | (-) | SNNGATNNNN     | ATAGATCTTG      |
| M0007 |             | 0.79882 |      |     |                |                 |
| 6     | V\$GATA2_01 | 7       | 1580 | (-) | NNNGATRNNN     | ATAGATCTTG      |
| M0012 |             | 0.79789 |      |     |                |                 |
| 7     | V\$GATA1_03 | 3       | 1584 | (+) | RNSNNGATAANNGN | ATCTTGACAACCAT  |
| M0012 |             | 0.79936 |      |     |                |                 |
| 7     | V\$GATA1_03 | 3       | 1599 | (-) | RNSNNGATAANNGN | AAACTTCTCATCCT  |
| M0012 |             | 0.79054 |      |     |                |                 |
| 7     | V\$GATA1_03 | 4       | 1602 | (-) | RNSNNGATAANNGN | CTTCTCATCCTTAC  |
| M0007 |             | 0.80965 |      |     |                |                 |
| 6     | V\$GATA2_01 | 3       | 1604 | (-) | NNNGATRNNN     | TCTCATCCTT      |
| M0007 |             | 0.82055 |      |     |                |                 |
| 7     | V\$GATA3_01 | 8       | 1604 | (-) | NNGATARNG      | TCTCATCCT       |
| M0012 |             | 0.81063 |      |     |                |                 |
| 7     | V\$GATA1_03 | 2       | 1608 | (-) | RNSNNGATAANNGN | ATCCTTACCTGTCT  |
| M0012 |             | 0.83088 |      |     |                |                 |
| 8     | V\$GATA1_04 | 2       | 1608 | (-) | NNCWGATARNNNN  | ATCCTTACCTGTC   |

|       |             |         |      |     |                 |                |
|-------|-------------|---------|------|-----|-----------------|----------------|
| M0007 |             | 0.78664 |      |     |                 |                |
| 6     | V\$GATA2_01 | 9       | 1614 | (-) | NNNGATRNNN      | ACCTGTCTTG     |
| M0007 |             | 0.77591 |      |     |                 |                |
| 5     | V\$GATA1_01 | 3       | 1626 | (+) | SNNGATNNNN      | GCTGTTGCTC     |
| M0007 |             | 0.83761 |      |     |                 |                |
| 5     | V\$GATA1_01 | 1       | 1668 | (+) | SNNGATNNNN      | GAAGATTCTA     |
| M0007 |             | 0.82589 |      |     |                 |                |
| 6     | V\$GATA2_01 | 1       | 1668 | (+) | NNNGATRNNN      | GAAGATTCTA     |
| M0007 |             |         |      |     |                 |                |
| 5     | V\$GATA1_01 | 0.84156 | 1675 | (+) | SNNGATNNNN      | CTAGATTCTT     |
| M0007 |             | 0.82971 |      |     |                 |                |
| 5     | V\$GATA1_01 | 4       | 1691 | (-) | SNNGATNNNN      | AGTCATCTCA     |
| M0007 |             | 0.87821 |      |     |                 |                |
| 6     | V\$GATA2_01 | 4       | 1691 | (-) | NNNGATRNNN      | AGTCATCTCA     |
| M0007 |             | 0.82329 |      |     |                 |                |
| 5     | V\$GATA1_01 | 7       | 1719 | (-) | SNNGATNNNN      | TCTCATCAAG     |
| M0012 |             |         |      |     |                 |                |
| 6     | V\$GATA1_02 | 0.83    | 1729 | (+) | NNNNNGATANKGNN  | TGCAAGATATTGTA |
| M0007 |             | 0.89141 |      |     |                 |                |
| 5     | V\$GATA1_01 | 2       | 1731 | (+) | SNNGATNNNN      | CAAGATATTG     |
| M0007 |             | 0.91655 |      |     |                 |                |
| 6     | V\$GATA2_01 | 4       | 1731 | (+) | NNNGATRNNN      | CAAGATATTG     |
| M0007 |             | 0.90163 |      |     |                 |                |
| 7     | V\$GATA3_01 | 9       | 1732 | (+) | NNGATARNG       | AAGATATTG      |
| M0007 |             |         |      |     |                 |                |
| 5     | V\$GATA1_01 | 0.83613 | 1754 | (+) | SNNGATNNNN      | TTTGATGGTC     |
| M0007 |             | 0.80604 |      |     |                 |                |
| 6     | V\$GATA2_01 | 4       | 1754 | (+) | NNNGATRNNN      | TTTGATGGTC     |
| M0012 |             | 0.80062 |      |     |                 |                |
| 6     | V\$GATA1_02 | 5       | 1781 | (+) | NNNNNGATANKGNN  | GTGTTGATATTAAA |
| M0012 |             | 0.79397 |      |     |                 |                |
| 7     | V\$GATA1_03 | 4       | 1781 | (+) | RNSNNGATAANNNGN | GTGTTGATATTAAA |
| M0007 |             | 0.82477 |      |     |                 |                |
| 5     | V\$GATA1_01 | 8       | 1783 | (+) | SNNGATNNNN      | GTTGATATTA     |
| M0007 |             | 0.78619 |      |     |                 |                |
| 6     | V\$GATA2_01 | 8       | 1783 | (+) | NNNGATRNNN      | GTTGATATTA     |
| M0007 |             | 0.83897 |      |     |                 |                |
| 6     | V\$GATA2_01 | 2       | 1794 | (-) | NNNGATRNNN      | AGCTATGGTA     |
| M0007 |             | 0.81235 |      |     |                 |                |
| 6     | V\$GATA2_01 | 9       | 1800 | (-) | NNNGATRNNN      | GGTAATCCTT     |
| M0020 |             | 0.83442 |      |     |                 |                |
| 3     | V\$GATA_C   | 1       | 1842 | (-) | NGATAAGNMNN     | AAGACTTAACT    |
| M0012 |             | 0.77593 |      |     |                 |                |
| 6     | V\$GATA1_02 | 8       | 1910 | (+) | NNNNNGATANKGNN  | AAAGAAATAAGGTA |
| M0007 |             | 0.81046 |      |     |                 |                |
| 5     | V\$GATA1_01 | 4       | 1941 | (-) | SNNGATNNNN      | GAGCATCAAA     |
| M0007 |             | 0.78078 |      |     |                 |                |
| 6     | V\$GATA2_01 | 5       | 1941 | (-) | NNNGATRNNN      | GAGCATCAAA     |
| M0012 |             | 0.82435 |      |     |                 |                |
| 7     | V\$GATA1_03 | 1       | 1949 | (+) | RNSNNGATAANNNGN | AAGAAGGTAAGTAG |
| M0007 |             | 0.78664 |      |     |                 |                |
| 6     | V\$GATA2_01 | 9       | 1990 | (+) | NNNGATRNNN      | TAACATATTT     |
| M0020 |             | 0.85430 |      |     |                 |                |
| 3     | V\$GATA_C   | 3       | 2007 | (-) | NGATAAGNMNN     | TATATATATCC    |
| M0007 |             |         |      |     |                 |                |
| 6     | V\$GATA2_01 | 0.7871  | 2010 | (-) | NNNGATRNNN      | ATATATCCAA     |
| M0007 |             |         |      |     |                 |                |
| 5     | V\$GATA1_01 | 0.7769  | 2041 | (+) | SNNGATNNNN      | GCTGCTGCTG     |
| M0007 |             | 0.80700 |      |     |                 |                |
| 5     | V\$GATA1_01 | 9       | 2089 | (+) | SNNGATNNNN      | ATTGATGGCA     |
| M0007 |             | 0.84649 |      |     |                 |                |
| 5     | V\$GATA1_01 | 6       | 2112 | (-) | SNNGATNNNN      | TGCCATCCCT     |
| M0007 |             | 0.88182 |      |     |                 |                |
| 6     | V\$GATA2_01 | 2       | 2112 | (-) | NNNGATRNNN      | TGCCATCCCT     |
| M0007 |             |         |      |     |                 |                |
| 7     | V\$GATA3_01 | 0.82942 | 2112 | (-) | NNGATARNG       | TGCCATCCC      |

|       |             |         |      |     |                |                |
|-------|-------------|---------|------|-----|----------------|----------------|
| M0007 |             | 0.82625 |      |     |                |                |
| 5     | V\$GATA1_01 | 9       | 2121 | (+) | SNNGATNNNN     | TGGGATTCTC     |
| M0007 |             | 0.86017 |      |     |                |                |
| 6     | V\$GATA2_01 | 1       | 2121 | (+) | NNNGATRNNN     | TGGGATTCTC     |
| M0007 |             | 0.78627 |      |     |                |                |
| 5     | V\$GATA1_01 | 8       | 2174 | (+) | SNNGATNNNN     | CATGAAAGTG     |
| M0012 |             | 0.78588 |      |     |                |                |
| 7     | V\$GATA1_03 | 9       | 2178 | (+) | RNSNNGATAANNGN | AAAGTGAAAAGTGA |
| M0012 |             | 0.79764 |      |     |                |                |
| 7     | V\$GATA1_03 | 8       | 2217 | (-) | RNSNNGATAANNGN | ACTCCTAGCAACCC |
| M0007 |             |         |      |     |                |                |
| 5     | V\$GATA1_01 | 0.78924 | 2248 | (-) | SNNGATNNNN     | CTCCATCCAT     |
| M0007 |             | 0.80503 |      |     |                |                |
| 5     | V\$GATA1_01 | 5       | 2257 | (+) | SNNGATNNNN     | TGGGATTTTC     |
| M0007 |             | 0.84889 |      |     |                |                |
| 6     | V\$GATA2_01 | 5       | 2257 | (+) | NNNGATRNNN     | TGGGATTTTC     |
| M0012 |             | 0.82239 |      |     |                |                |
| 7     | V\$GATA1_03 | 1       | 2335 | (-) | RNSNNGATAANNGN | CAGTGTATCCACTT |
| M0007 |             | 0.80207 |      |     |                |                |
| 5     | V\$GATA1_01 | 3       | 2337 | (-) | SNNGATNNNN     | GTGTATCCAC     |
| M0007 |             | 0.80920 |      |     |                |                |
| 6     | V\$GATA2_01 | 2       | 2337 | (-) | NNNGATRNNN     | GTGTATCCAC     |
| M0007 |             | 0.89486 |      |     |                |                |
| 5     | V\$GATA1_01 | 7       | 2374 | (+) | SNNGATNNNN     | TGAGATGGCT     |
| M0007 |             | 0.92963 |      |     |                |                |
| 6     | V\$GATA2_01 | 5       | 2374 | (+) | NNNGATRNNN     | TGAGATGGCT     |
| M0007 |             | 0.84271 |      |     |                |                |
| 7     | V\$GATA3_01 | 2       | 2375 | (+) | NNGATARNG      | GAGATGGCT      |
| M0012 |             |         |      |     |                |                |
| 7     | V\$GATA1_03 | 0.78099 | 2407 | (+) | RNSNNGATAANNGN | GTACAGAAAGTTGG |
| M0007 |             | 0.83958 |      |     |                |                |
| 5     | V\$GATA1_01 | 5       | 2430 | (+) | SNNGATNNNN     | GCTGATTCAA     |
| M0007 |             | 0.78258 |      |     |                |                |
| 6     | V\$GATA2_01 | 9       | 2430 | (+) | NNNGATRNNN     | GCTGATTCAA     |
| M0012 |             |         |      |     |                |                |
| 6     | V\$GATA1_02 | 0.8875  | 2472 | (+) | NNNNNGATANKGNN | AACTAGATAATGTA |
| M0012 |             | 0.86599 |      |     |                |                |
| 7     | V\$GATA1_03 | 7       | 2472 | (+) | RNSNNGATAANNGN | AACTAGATAATGTA |
| M0012 |             | 0.82781 |      |     |                |                |
| 8     | V\$GATA1_04 | 9       | 2473 | (+) | NNCWGATARNNNN  | ACTAGATAATGTA  |
| M0007 |             | 0.83711 |      |     |                |                |
| 5     | V\$GATA1_01 | 7       | 2474 | (+) | SNNGATNNNN     | CTAGATAATG     |
| M0007 |             | 0.82002 |      |     |                |                |
| 6     | V\$GATA2_01 | 7       | 2474 | (+) | NNNGATRNNN     | CTAGATAATG     |
| M0007 |             | 0.90917 |      |     |                |                |
| 7     | V\$GATA3_01 | 1       | 2475 | (+) | NNGATARNG      | TAGATAATG      |
| M0020 |             | 0.86331 |      |     |                |                |
| 3     | V\$GATA_C   | 2       | 2476 | (+) | NGATAAGNMNN    | AGATAATGTAA    |
| M0007 |             | 0.79341 |      |     |                |                |
| 6     | V\$GATA2_01 | 5       | 2605 | (+) | NNNGATRNNN     | CCCCATAGAC     |
| M0007 |             | 0.90572 |      |     |                |                |
| 5     | V\$GATA1_01 | 6       | 2632 | (-) | SNNGATNNNN     | CCCCATCCCT     |
| M0007 |             | 0.91204 |      |     |                |                |
| 6     | V\$GATA2_01 | 3       | 2632 | (-) | NNNGATRNNN     | CCCCATCCCT     |
| M0007 |             | 0.90119 |      |     |                |                |
| 7     | V\$GATA3_01 | 6       | 2632 | (-) | NNGATARNG      | CCCCATCCC      |
| M0007 |             | 0.82625 |      |     |                |                |
| 5     | V\$GATA1_01 | 9       | 2641 | (+) | SNNGATNNNN     | TGGGATTCTC     |
| M0007 |             | 0.86017 |      |     |                |                |
| 6     | V\$GATA2_01 | 1       | 2641 | (+) | NNNGATRNNN     | TGGGATTCTC     |
| M0007 |             | 0.78627 |      |     |                |                |
| 5     | V\$GATA1_01 | 8       | 2694 | (+) | SNNGATNNNN     | CATGAAAGTG     |
| M0012 |             | 0.78593 |      |     |                |                |
| 6     | V\$GATA1_02 | 8       | 2698 | (+) | NNNNNGATANKGNN | AAAGTGAGAAGGGA |
| M0012 |             | 0.79519 |      |     |                |                |
| 7     | V\$GATA1_03 | 8       | 2698 | (+) | RNSNNGATAANNGN | AAAGTGAGAAGGGA |

|       |             |         |      |     |                 |                |
|-------|-------------|---------|------|-----|-----------------|----------------|
| M0007 |             | 0.82410 |      |     |                 |                |
| 7     | V\$GATA3_01 | 3       | 2701 | (+) | NNGATARNG       | GTGAGAAGG      |
| M0007 |             | 0.80503 |      |     |                 |                |
| 5     | V\$GATA1_01 | 5       | 2784 | (+) | SNNGATNNNN      | TGGGATTTTC     |
| M0007 |             | 0.84889 |      |     |                 |                |
| 6     | V\$GATA2_01 | 5       | 2784 | (+) | NNNGATRNNN      | TGGGATTTTC     |
| M0012 |             | 0.88156 |      |     |                 |                |
| 6     | V\$GATA1_02 | 3       | 2841 | (+) | NNNNNGATANKGNN  | CTCTAGATAATGAT |
| M0012 |             | 0.87432 |      |     |                 |                |
| 7     | V\$GATA1_03 | 6       | 2841 | (+) | RNSNNGATAANNNGN | CTCTAGATAATGAT |
| M0012 |             | 0.86550 |      |     |                 |                |
| 8     | V\$GATA1_04 | 2       | 2842 | (+) | NNCWGATARNNNN   | TCTAGATAATGAT  |
| M0007 |             | 0.83711 |      |     |                 |                |
| 5     | V\$GATA1_01 | 7       | 2843 | (+) | SNNGATNNNN      | CTAGATAATG     |
| M0007 |             | 0.82002 |      |     |                 |                |
| 6     | V\$GATA2_01 | 7       | 2843 | (+) | NNNGATRNNN      | CTAGATAATG     |
| M0007 |             | 0.90917 |      |     |                 |                |
| 7     | V\$GATA3_01 | 1       | 2844 | (+) | NNGATARNG       | TAGATAATG      |
| M0020 |             | 0.89934 |      |     |                 |                |
| 3     | V\$GATA_C   | 8       | 2845 | (+) | NGATAAGNMNN     | AGATAATGATA    |
| M0012 |             | 0.79468 |      |     |                 |                |
| 6     | V\$GATA1_02 | 7       | 2847 | (+) | NNNNNGATANKGNN  | ATAATGATAAATAA |
| M0012 |             | 0.86305 |      |     |                 |                |
| 7     | V\$GATA1_03 | 7       | 2847 | (+) | RNSNNGATAANNNGN | ATAATGATAAATAA |
| M0012 |             | 0.88449 |      |     |                 |                |
| 8     | V\$GATA1_04 | 8       | 2848 | (+) | NNCWGATARNNNN   | TAATGATAAATAA  |
| M0007 |             | 0.77393 |      |     |                 |                |
| 5     | V\$GATA1_01 | 9       | 2849 | (+) | SNNGATNNNN      | AATGATAAAT     |
| M0007 |             |         |      |     |                 |                |
| 6     | V\$GATA2_01 | 0.79567 | 2849 | (+) | NNNGATRNNN      | AATGATAAAT     |
| M0007 |             | 0.82321 |      |     |                 |                |
| 7     | V\$GATA3_01 | 7       | 2850 | (+) | NNGATARNG       | ATGATAAAT      |
| M0020 |             | 0.93227 |      |     |                 |                |
| 3     | V\$GATA_C   | 7       | 2851 | (+) | NGATAAGNMNN     | TGATAAATAAA    |
| M0007 |             | 0.85784 |      |     |                 |                |
| 5     | V\$GATA1_01 | 8       | 2867 | (-) | SNNGATNNNN      | AGGAATCAAC     |
| M0007 |             | 0.78168 |      |     |                 |                |
| 6     | V\$GATA2_01 | 7       | 2867 | (-) | NNNGATRNNN      | AGGAATCAAC     |
| M0020 |             | 0.83939 |      |     |                 |                |
| 3     | V\$GATA_C   | 1       | 2877 | (+) | NGATAAGNMNN     | TGACAAGAAAAG   |
| M0007 |             | 0.78282 |      |     |                 |                |
| 5     | V\$GATA1_01 | 3       | 2886 | (+) | SNNGATNNNN      | AGTGATTCAA     |
| M0012 |             | 0.85781 |      |     |                 |                |
| 6     | V\$GATA1_02 | 3       | 2895 | (+) | NNNNNGATANKGNN  | AATAAGATAATAGT |
| M0012 |             | 0.84443 |      |     |                 |                |
| 7     | V\$GATA1_03 | 9       | 2895 | (+) | RNSNNGATAANNNGN | AATAAGATAATAGT |
| M0012 |             | 0.91268 |      |     |                 |                |
| 8     | V\$GATA1_04 | 4       | 2896 | (+) | NNCWGATARNNNN   | ATAAGATAATAGT  |
| M0007 |             | 0.84979 |      |     |                 |                |
| 6     | V\$GATA2_01 | 7       | 2897 | (+) | NNNGATRNNN      | TAAGATAATA     |
| M0007 |             | 0.89853 |      |     |                 |                |
| 7     | V\$GATA3_01 | 8       | 2898 | (+) | NNGATARNG       | AAGATAATA      |
| M0020 |             | 0.87138 |      |     |                 |                |
| 3     | V\$GATA_C   | 9       | 2899 | (+) | NGATAAGNMNN     | AGATAATAGTT    |
| M0007 |             | 0.77887 |      |     |                 |                |
| 5     | V\$GATA1_01 | 5       | 2910 | (+) | SNNGATNNNN      | TTGGATATTT     |
| M0007 |             | 0.82724 |      |     |                 |                |
| 6     | V\$GATA2_01 | 4       | 2910 | (+) | NNNGATRNNN      | TTGGATATTT     |
| M0012 |             |         |      |     |                 |                |
| 6     | V\$GATA1_02 | 0.8125  | 2927 | (-) | NNNNNGATANKGNN  | CAAACATCAAATA  |
| M0012 |             | 0.81188 |      |     |                 |                |
| 8     | V\$GATA1_04 | 7       | 2927 | (-) | NNCWGATARNNNN   | CAAACATCAAAT   |
| M0007 |             | 0.85093 |      |     |                 |                |
| 5     | V\$GATA1_01 | 8       | 2929 | (-) | SNNGATNNNN      | AACTATCAAA     |
| M0007 |             | 0.83806 |      |     |                 |                |
| 6     | V\$GATA2_01 | 9       | 2929 | (-) | NNNGATRNNN      | AACTATCAAA     |



|       |             |         |      |     |                |                |
|-------|-------------|---------|------|-----|----------------|----------------|
| M0007 |             | 0.84714 |      |     |                |                |
| 7     | V\$GATA3_01 | 2       | 2929 | (-) | NNGATARNG      | AACTATCAA      |
| M0012 |             | 0.78906 |      |     |                |                |
| 6     | V\$GATA1_02 | 2       | 2963 | (+) | NNNNNGATANKGNN | GCTGAGATATTCTA |
| M0007 |             | 0.83316 |      |     |                |                |
| 5     | V\$GATA1_01 | 9       | 2965 | (+) | SNNGATNNNN     | TGAGATATTC     |
| M0007 |             | 0.89896 |      |     |                |                |
| 6     | V\$GATA2_01 | 3       | 2965 | (+) | NNNGATRNNN     | TGAGATATTC     |
| M0007 |             | 0.85201 |      |     |                |                |
| 7     | V\$GATA3_01 | 6       | 2966 | (+) | NNGATARNG      | GAGATATTC      |
| M0012 |             | 0.77281 |      |     |                |                |
| 6     | V\$GATA1_02 | 3       | 2984 | (-) | NNNNNGATANKGNN | ACTCTTATTTTCTA |
| M0012 |             | 0.81035 |      |     |                |                |
| 8     | V\$GATA1_04 | 5       | 2984 | (-) | NNCWGATARNNNN  | ACTCTTATTTTCT  |
| M0007 |             | 0.77986 |      |     |                |                |
| 5     | V\$GATA1_01 | 2       | 3008 | (+) | SNNGATNNNN     | AATGATTGAA     |
| M0007 |             | 0.84980 |      |     |                |                |
| 7     | V\$GATA3_01 | 1       | 3009 | (+) | NNGATARNG      | ATGATTGAA      |
| M0007 |             | 0.83020 |      |     |                |                |
| 5     | V\$GATA1_01 | 7       | 3016 | (-) | SNNGATNNNN     | AAGGATCACT     |
| M0007 |             | 0.81596 |      |     |                |                |
| 6     | V\$GATA2_01 | 8       | 3016 | (+) | NNNGATRNNN     | AAGGATCACT     |
| M0007 |             | 0.80559 |      |     |                |                |
| 6     | V\$GATA2_01 | 3       | 3016 | (-) | NNNGATRNNN     | AAGGATCACT     |
| M0012 |             | 0.80083 |      |     |                |                |
| 7     | V\$GATA1_03 | 3       | 3024 | (-) | RNSNNGATAANNGN | CTAATAATCCAGCT |
| M0007 |             | 0.79763 |      |     |                |                |
| 5     | V\$GATA1_01 | 1       | 3026 | (-) | SNNGATNNNN     | AATAATCCAG     |
| M0007 |             | 0.82527 |      |     |                |                |
| 5     | V\$GATA1_01 | 1       | 3073 | (-) | SNNGATNNNN     | AAGCATCAAA     |
| M0007 |             | 0.78439 |      |     |                |                |
| 6     | V\$GATA2_01 | 3       | 3073 | (-) | NNNGATRNNN     | AAGCATCAAA     |
| M0007 |             | 0.78282 |      |     |                |                |
| 5     | V\$GATA1_01 | 3       | 3081 | (+) | SNNGATNNNN     | AAAGATGGAA     |
| M0007 |             |         |      |     |                |                |
| 6     | V\$GATA2_01 | 0.80018 | 3081 | (+) | NNNGATRNNN     | AAAGATGGAA     |
| M0007 |             | 0.85334 |      |     |                |                |
| 7     | V\$GATA3_01 | 5       | 3082 | (+) | NNGATARNG      | AAGATGGAA      |
| M0020 |             |         |      |     |                |                |
| 3     | V\$GATA_C   | 0.84343 | 3086 | (-) | NGATAAGNMNN    | TGGAAATATCT    |
| M0012 |             | 0.86366 |      |     |                |                |
| 8     | V\$GATA1_04 | 4       | 3087 | (-) | NNCWGATARNNNN  | GGAAATATCTGAC  |
| M0007 |             | 0.84007 |      |     |                |                |
| 5     | V\$GATA1_01 | 9       | 3089 | (-) | SNNGATNNNN     | AAATATCTGA     |
| M0007 |             | 0.90257 |      |     |                |                |
| 6     | V\$GATA2_01 | 1       | 3089 | (-) | NNNGATRNNN     | AAATATCTGA     |
| M0007 |             | 0.82897 |      |     |                |                |
| 7     | V\$GATA3_01 | 7       | 3089 | (-) | NNGATARNG      | AAATATCTG      |
| M0020 |             | 0.92264 |      |     |                |                |
| 3     | V\$GATA_C   | 7       | 3151 | (-) | NGATAAGNMNN    | AGTCCATATCT    |
| M0012 |             | 0.86187 |      |     |                |                |
| 6     | V\$GATA1_02 | 5       | 3152 | (-) | NNNNNGATANKGNN | GTCCATATCTTTTC |
| M0012 |             | 0.79397 |      |     |                |                |
| 7     | V\$GATA1_03 | 4       | 3152 | (-) | RNSNNGATAANNGN | GTCCATATCTTTTC |
| M0012 |             | 0.90410 |      |     |                |                |
| 8     | V\$GATA1_04 | 5       | 3152 | (-) | NNCWGATARNNNN  | GTCCATATCTTTT  |
| M0007 |             |         |      |     |                |                |
| 5     | V\$GATA1_01 | 0.83465 | 3154 | (-) | SNNGATNNNN     | CCATATCTTT     |
| M0007 |             | 0.88137 |      |     |                |                |
| 6     | V\$GATA2_01 | 1       | 3154 | (-) | NNNGATRNNN     | CCATATCTTT     |
| M0007 |             | 0.92246 |      |     |                |                |
| 7     | V\$GATA3_01 | 3       | 3154 | (-) | NNGATARNG      | CCATATCTT      |
| M0020 |             | 0.85088 |      |     |                |                |
| 3     | V\$GATA_C   | 5       | 3164 | (-) | NGATAAGNMNN    | TCCTTTTATCA    |
| M0012 |             | 0.84406 |      |     |                |                |
| 6     | V\$GATA1_02 | 3       | 3165 | (-) | NNNNNGATANKGNN | CCTTTTATCAGTGA |

|       |             |         |      |     |                |                |
|-------|-------------|---------|------|-----|----------------|----------------|
| M0012 |             | 0.79299 |      |     |                |                |
| 7     | V\$GATA1_03 | 4       | 3165 | (-) | RNSNNGATAANNGN | CCTTTTATCAGTGA |
| M0012 |             | 0.87009 |      |     |                |                |
| 8     | V\$GATA1_04 | 8       | 3165 | (-) | NNCWGATARNNNN  | CCTTTTATCAGTG  |
| M0007 |             | 0.84935 |      |     |                |                |
| 7     | V\$GATA3_01 | 8       | 3167 | (-) | NNGATARNG      | TTTTATCAG      |
| M0012 |             |         |      |     |                |                |
| 6     | V\$GATA1_02 | 0.79125 | 3178 | (+) | NNNNNGATANKGNN | AAACAGATATAGAT |
| M0012 |             |         |      |     |                |                |
| 8     | V\$GATA1_04 | 0.90288 | 3179 | (+) | NNCWGATARNNNN  | AACAGATATAGAT  |
| M0007 |             | 0.80355 |      |     |                |                |
| 5     | V\$GATA1_01 | 4       | 3180 | (+) | SNNGATNNNN     | ACAGATATAG     |
| M0007 |             | 0.84303 |      |     |                |                |
| 6     | V\$GATA2_01 | 1       | 3180 | (+) | NNNGATRNNN     | ACAGATATAG     |
| M0007 |             | 0.87594 |      |     |                |                |
| 7     | V\$GATA3_01 | 2       | 3181 | (+) | NNGATARNG      | CAGATATAG      |
| M0020 |             | 0.86859 |      |     |                |                |
| 3     | V\$GATA_C   | 3       | 3182 | (+) | NGATAAGNMNN    | AGATATAGATC    |
| M0007 |             | 0.80898 |      |     |                |                |
| 5     | V\$GATA1_01 | 3       | 3186 | (-) | SNNGATNNNN     | ATAGATCCCC     |
| M0007 |             | 0.82679 |      |     |                |                |
| 6     | V\$GATA2_01 | 3       | 3186 | (-) | NNNGATRNNN     | ATAGATCCCC     |
| M0007 |             |         |      |     |                |                |
| 5     | V\$GATA1_01 | 0.82922 | 3202 | (+) | SNNGATNNNN     | ACAGATTCTT     |
| M0007 |             |         |      |     |                |                |
| 6     | V\$GATA2_01 | 0.81687 | 3202 | (+) | NNNGATRNNN     | ACAGATTCTT     |
| M0007 |             | 0.83168 |      |     |                |                |
| 5     | V\$GATA1_01 | 8       | 3229 | (-) | SNNGATNNNN     | AAACATCATT     |
| M0007 |             | 0.82228 |      |     |                |                |
| 6     | V\$GATA2_01 | 2       | 3229 | (-) | NNNGATRNNN     | AAACATCATT     |
| M0007 |             | 0.81688 |      |     |                |                |
| 5     | V\$GATA1_01 | 1       | 3263 | (-) | SNNGATNNNN     | ATAAATCTTG     |
| M0007 |             | 0.79882 |      |     |                |                |
| 6     | V\$GATA2_01 | 7       | 3263 | (-) | NNNGATRNNN     | ATAAATCTTG     |
| M0007 |             | 0.89141 |      |     |                |                |
| 5     | V\$GATA1_01 | 2       | 3289 | (+) | SNNGATNNNN     | GCAGATTGAG     |
| M0007 |             | 0.86197 |      |     |                |                |
| 6     | V\$GATA2_01 | 6       | 3289 | (+) | NNNGATRNNN     | GCAGATTGAG     |
| M0007 |             | 0.90252 |      |     |                |                |
| 7     | V\$GATA3_01 | 5       | 3290 | (+) | NNGATARNG      | CAGATTGAG      |
| M0012 |             | 0.79437 |      |     |                |                |
| 6     | V\$GATA1_02 | 5       | 3320 | (+) | NNNNNGATANKGNN | TTTATGATAAAAAA |
| M0012 |             | 0.90165 |      |     |                |                |
| 8     | V\$GATA1_04 | 4       | 3321 | (+) | NNCWGATARNNNN  | TTATGATAAAAAA  |
| M0007 |             | 0.79837 |      |     |                |                |
| 6     | V\$GATA2_01 | 6       | 3322 | (+) | NNNGATRNNN     | TATGATAAAA     |
| M0007 |             | 0.85511 |      |     |                |                |
| 7     | V\$GATA3_01 | 7       | 3323 | (+) | NNGATARNG      | ATGATAAAA      |
| M0020 |             | 0.93662 |      |     |                |                |
| 3     | V\$GATA_C   | 6       | 3324 | (+) | NGATAAGNMNN    | TGATAAAAAAT    |
| M0007 |             | 0.78035 |      |     |                |                |
| 5     | V\$GATA1_01 | 5       | 3334 | (-) | SNNGATNNNN     | TAAAAATCCAG    |
| M0012 |             | 0.80818 |      |     |                |                |
| 7     | V\$GATA1_03 | 2       | 3338 | (+) | RNSNNGATAANNGN | ATCCAGACAAACAG |
| M0007 |             | 0.79812 |      |     |                |                |
| 5     | V\$GATA1_01 | 4       | 3356 | (+) | SNNGATNNNN     | TCAGATTATT     |
| M0007 |             | 0.82318 |      |     |                |                |
| 6     | V\$GATA2_01 | 4       | 3356 | (+) | NNNGATRNNN     | TCAGATTATT     |
| M0007 |             | 0.82720 |      |     |                |                |
| 7     | V\$GATA3_01 | 4       | 3357 | (+) | NNGATARNG      | CAGATTATT      |
| M0020 |             | 0.86175 |      |     |                |                |
| 3     | V\$GATA_C   | 8       | 3363 | (-) | NGATAAGNMNN    | ATTTTTTGCT     |
| M0012 |             | 0.78564 |      |     |                |                |
| 7     | V\$GATA1_03 | 4       | 3372 | (-) | RNSNNGATAANNGN | CTTTTATATACTT  |
| M0012 |             | 0.80769 |      |     |                |                |
| 7     | V\$GATA1_03 | 2       | 3380 | (-) | RNSNNGATAANNGN | ATACTTTTCTCCAC |

|       |             |         |      |     |                |                |
|-------|-------------|---------|------|-----|----------------|----------------|
| M0007 |             | 0.78890 |      |     |                |                |
| 6     | V\$GATA2_01 | 4       | 3391 | (+) | NNNGATRNNN     | CACCATATTC     |
| M0012 |             |         |      |     |                |                |
| 6     | V\$GATA1_02 | 0.83    | 3407 | (+) | NNNNNGATANKGNN | CAGAAGATAATTTA |
| M0012 |             | 0.85668 |      |     |                |                |
| 7     | V\$GATA1_03 | 8       | 3407 | (+) | RNSNNGATAANNGN | CAGAAGATAATTTA |
| M0012 |             | 0.84926 |      |     |                |                |
| 8     | V\$GATA1_04 | 5       | 3408 | (+) | NNCWGATARNNNN  | AGAAGATAATTTA  |
| M0007 |             | 0.85735 |      |     |                |                |
| 5     | V\$GATA1_01 | 4       | 3409 | (+) | SNNGATNNNN     | GAAGATAATT     |
| M0007 |             | 0.89400 |      |     |                |                |
| 6     | V\$GATA2_01 | 1       | 3409 | (+) | NNNGATRNNN     | GAAGATAATT     |
| M0007 |             | 0.86663 |      |     |                |                |
| 7     | V\$GATA3_01 | 7       | 3410 | (+) | NNGATARNG      | AAGATAATT      |
| M0020 |             |         |      |     |                |                |
| 3     | V\$GATA_C   | 0.85306 | 3411 | (+) | NGATAAGNMNN    | AGATAATTTAC    |
| M0012 |             | 0.80769 |      |     |                |                |
| 7     | V\$GATA1_03 | 2       | 3418 | (-) | RNSNNGATAANNGN | TTACTTTTCTTGAT |
| M0007 |             | 0.84106 |      |     |                |                |
| 5     | V\$GATA1_01 | 6       | 3426 | (+) | SNNGATNNNN     | CTTGATTTTT     |
| M0020 |             | 0.83690 |      |     |                |                |
| 3     | V\$GATA_C   | 6       | 3429 | (-) | NGATAAGNMNN    | GATTTTTGTCA    |
| M0012 |             | 0.77531 |      |     |                |                |
| 6     | V\$GATA1_02 | 3       | 3540 | (+) | NNNNNGATANKGNN | CTTGTGATATTATT |
| M0007 |             | 0.83316 |      |     |                |                |
| 5     | V\$GATA1_01 | 9       | 3542 | (+) | SNNGATNNNN     | TGTGATATTA     |
| M0007 |             | 0.86152 |      |     |                |                |
| 6     | V\$GATA2_01 | 5       | 3542 | (+) | NNNGATRNNN     | TGTGATATTA     |
| M0007 |             | 0.86043 |      |     |                |                |
| 7     | V\$GATA3_01 | 4       | 3543 | (+) | NNGATARNG      | GTGATATTA      |
| M0007 |             | 0.81490 |      |     |                |                |
| 5     | V\$GATA1_01 | 6       | 3610 | (-) | SNNGATNNNN     | AAACATCCTA     |
| M0007 |             | 0.88046 |      |     |                |                |
| 6     | V\$GATA2_01 | 9       | 3610 | (-) | NNNGATRNNN     | AAACATCCTA     |
| M0012 |             |         |      |     |                |                |
| 6     | V\$GATA1_02 | 0.85125 | 3613 | (-) | NNNNNGATANKGNN | CATCCTATCAAGCA |
| M0012 |             |         |      |     |                |                |
| 7     | V\$GATA1_03 | 0.78197 | 3613 | (-) | RNSNNGATAANNGN | CATCCTATCAAGCA |
| M0012 |             | 0.84466 |      |     |                |                |
| 8     | V\$GATA1_04 | 9       | 3613 | (-) | NNCWGATARNNNN  | CATCCTATCAAGC  |
| M0007 |             |         |      |     |                |                |
| 5     | V\$GATA1_01 | 0.88845 | 3615 | (-) | SNNGATNNNN     | TCCTATCAAG     |
| M0007 |             | 0.82363 |      |     |                |                |
| 6     | V\$GATA2_01 | 6       | 3615 | (-) | NNNGATRNNN     | TCCTATCAAG     |
| M0007 |             | 0.89986 |      |     |                |                |
| 7     | V\$GATA3_01 | 7       | 3615 | (-) | NNGATARNG      | TCCTATCAA      |
| M0007 |             | 0.80651 |      |     |                |                |
| 5     | V\$GATA1_01 | 5       | 3694 | (+) | SNNGATNNNN     | AGTGATGATA     |
| M0007 |             | 0.78574 |      |     |                |                |
| 6     | V\$GATA2_01 | 7       | 3694 | (+) | NNNGATRNNN     | AGTGATGATA     |
| M0007 |             | 0.83872 |      |     |                |                |
| 7     | V\$GATA3_01 | 4       | 3695 | (+) | NNGATARNG      | GTGATGATA      |
| M0012 |             | 0.80718 |      |     |                |                |
| 6     | V\$GATA1_02 | 7       | 3695 | (+) | NNNNNGATANKGNN | GTGATGATAAATTG |
| M0012 |             | 0.87040 |      |     |                |                |
| 7     | V\$GATA1_03 | 7       | 3695 | (+) | RNSNNGATAANNGN | GTGATGATAAATTG |
| M0012 |             | 0.86795 |      |     |                |                |
| 8     | V\$GATA1_04 | 3       | 3696 | (+) | NNCWGATARNNNN  | TGATGATAAATTG  |
| M0007 |             | 0.83859 |      |     |                |                |
| 5     | V\$GATA1_01 | 8       | 3697 | (+) | SNNGATNNNN     | GATGATAAAT     |
| M0007 |             |         |      |     |                |                |
| 6     | V\$GATA2_01 | 0.84258 | 3697 | (+) | NNNGATRNNN     | GATGATAAAT     |
| M0007 |             | 0.82321 |      |     |                |                |
| 7     | V\$GATA3_01 | 7       | 3698 | (+) | NNGATARNG      | ATGATAAAT      |
| M0020 |             | 0.83566 |      |     |                |                |
| 3     | V\$GATA_C   | 3       | 3699 | (+) | NGATAAGNMNN    | TGATAAATTGC    |

|       |             |         |      |     |                |                |
|-------|-------------|---------|------|-----|----------------|----------------|
| M0012 |             | 0.83406 |      |     |                |                |
| 6     | V\$GATA1_02 | 3       | 3776 | (-) | NNNNNGATANKGNN | TGTAATATCTCAA  |
| M0012 |             | 0.82077 |      |     |                |                |
| 8     | V\$GATA1_04 | 2       | 3776 | (-) | NNCWGATARNNNN  | TGTAATATCTCA   |
| M0007 |             | 0.84007 |      |     |                |                |
| 5     | V\$GATA1_01 | 9       | 3778 | (-) | SNNGATNNNN     | TAATATCTTC     |
| M0007 |             | 0.87911 |      |     |                |                |
| 6     | V\$GATA2_01 | 6       | 3778 | (-) | NNNGATRNNN     | TAATATCTTC     |
| M0007 |             | 0.86663 |      |     |                |                |
| 7     | V\$GATA3_01 | 7       | 3778 | (-) | NNGATARNG      | TAATATCTT      |
| M0007 |             | 0.78726 |      |     |                |                |
| 5     | V\$GATA1_01 | 6       | 3804 | (-) | SNNGATNNNN     | ATTGATCTGC     |
| M0007 |             | 0.79747 |      |     |                |                |
| 6     | V\$GATA2_01 | 4       | 3804 | (-) | NNNGATRNNN     | ATTGATCTGC     |
| M0007 |             | 0.79318 |      |     |                |                |
| 5     | V\$GATA1_01 | 9       | 3935 | (+) | SNNGATNNNN     | ATTGATTCTT     |
| M0020 |             | 0.84653 |      |     |                |                |
| 3     | V\$GATA_C   | 6       | 3941 | (-) | NGATAAGNMNN    | TCTTCTATCT     |
| M0012 |             |         |      |     |                |                |
| 6     | V\$GATA1_02 | 0.84375 | 3942 | (-) | NNNNNGATANKGNN | CTTCTATCTCTTC  |
| M0012 |             | 0.84198 |      |     |                |                |
| 7     | V\$GATA1_03 | 9       | 3942 | (-) | RNSNNGATAANNGN | CTTCTATCTCTTC  |
| M0012 |             | 0.90471 |      |     |                |                |
| 8     | V\$GATA1_04 | 8       | 3942 | (-) | NNCWGATARNNNN  | CTTCTATCTCTT   |
| M0007 |             | 0.81145 |      |     |                |                |
| 5     | V\$GATA1_01 | 1       | 3944 | (-) | SNNGATNNNN     | TTCTATCTCT     |
| M0007 |             | 0.83671 |      |     |                |                |
| 6     | V\$GATA2_01 | 6       | 3944 | (-) | NNNGATRNNN     | TTCTATCTCT     |
| M0007 |             | 0.92423 |      |     |                |                |
| 7     | V\$GATA3_01 | 6       | 3944 | (-) | NNGATARNG      | TTCTATCTC      |
| M0007 |             | 0.77788 |      |     |                |                |
| 5     | V\$GATA1_01 | 7       | 3984 | (+) | SNNGATNNNN     | CTTGATCTCA     |
| M0007 |             | 0.79612 |      |     |                |                |
| 6     | V\$GATA2_01 | 1       | 3984 | (-) | NNNGATRNNN     | CTTGATCTCA     |
| M0012 |             | 0.80937 |      |     |                |                |
| 6     | V\$GATA1_02 | 5       | 4013 | (+) | NNNNNGATANKGNN | AATTAGATACTCTA |
| M0007 |             | 0.78973 |      |     |                |                |
| 5     | V\$GATA1_01 | 3       | 4015 | (+) | SNNGATNNNN     | TTAGATACTC     |
| M0007 |             | 0.82047 |      |     |                |                |
| 6     | V\$GATA2_01 | 8       | 4015 | (+) | NNNGATRNNN     | TTAGATACTC     |
| M0020 |             | 0.86206 |      |     |                |                |
| 3     | V\$GATA_C   | 9       | 4019 | (-) | NGATAAGNMNN    | ATACTCTATCA    |
| M0012 |             |         |      |     |                |                |
| 6     | V\$GATA1_02 | 0.81625 | 4020 | (-) | NNNNNGATANKGNN | TACTCTATCACACA |
| M0012 |             |         |      |     |                |                |
| 8     | V\$GATA1_04 | 0.85723 | 4020 | (-) | NNCWGATARNNNN  | TACTCTATCACAC  |
| M0007 |             | 0.88746 |      |     |                |                |
| 5     | V\$GATA1_01 | 3       | 4022 | (-) | SNNGATNNNN     | CTCTATCACA     |
| M0007 |             | 0.90076 |      |     |                |                |
| 6     | V\$GATA2_01 | 7       | 4022 | (-) | NNNGATRNNN     | CTCTATCACA     |
| M0007 |             | 0.93575 |      |     |                |                |
| 7     | V\$GATA3_01 | 5       | 4022 | (-) | NNGATARNG      | CTCTATCAC      |
| M0007 |             | 0.79417 |      |     |                |                |
| 5     | V\$GATA1_01 | 6       | 4048 | (-) | SNNGATNNNN     | ATTAATCTTC     |
| M0007 |             | 0.78935 |      |     |                |                |
| 6     | V\$GATA2_01 | 5       | 4048 | (-) | NNNGATRNNN     | ATTAATCTTC     |
| M0012 |             |         |      |     |                |                |
| 6     | V\$GATA1_02 | 0.85625 | 4058 | (-) | NNNNNGATANKGNN | CACCTATCCACTA  |
| M0007 |             | 0.90572 |      |     |                |                |
| 5     | V\$GATA1_01 | 6       | 4060 | (-) | SNNGATNNNN     | CCCTATCCAC     |
| M0007 |             | 0.89760 |      |     |                |                |
| 6     | V\$GATA2_01 | 9       | 4060 | (-) | NNNGATRNNN     | CCCTATCCAC     |
| M0007 |             | 0.91315 |      |     |                |                |
| 7     | V\$GATA3_01 | 9       | 4060 | (-) | NNGATARNG      | CCCTATCCA      |
| M0012 |             | 0.82361 |      |     |                |                |
| 7     | V\$GATA1_03 | 6       | 4102 | (+) | RNSNNGATAANNGN | AGCCAGACAGCAGA |

|       |             |         |      |     |                 |                |
|-------|-------------|---------|------|-----|-----------------|----------------|
| M0012 |             | 0.89343 |      |     |                 |                |
| 6     | V\$GATA1_02 | 7       | 4113 | (+) | NNNNNGATANKGNN  | AGAGAGATAAGGTT |
| M0012 |             | 0.89882 |      |     |                 |                |
| 7     | V\$GATA1_03 | 4       | 4113 | (+) | RNSNNGATAANNNGN | AGAGAGATAAGGTT |
| M0012 |             | 0.90410 |      |     |                 |                |
| 8     | V\$GATA1_04 | 5       | 4114 | (+) | NNCWGATARNNNN   | GAGAGATAAGGTT  |
| M0007 |             | 0.84501 |      |     |                 |                |
| 5     | V\$GATA1_01 | 5       | 4115 | (+) | SNNGATNNNN      | AGAGATAAGG     |
| M0007 |             | 0.87460 |      |     |                 |                |
| 6     | V\$GATA2_01 | 5       | 4115 | (+) | NNNGATRNNN      | AGAGATAAGG     |
| M0007 |             | 0.97164 |      |     |                 |                |
| 7     | V\$GATA3_01 | 4       | 4116 | (+) | NNGATARNG       | GAGATAAGG      |
| M0020 |             | 0.92854 |      |     |                 |                |
| 3     | V\$GATA_C   | 9       | 4117 | (+) | NGATAAGNMNN     | AGATAAGGTTC    |
| M0007 |             | 0.79837 |      |     |                 |                |
| 6     | V\$GATA2_01 | 6       | 4154 | (+) | NNNGATRNNN      | TCAGTTAGCT     |
| M0007 |             | 0.83085 |      |     |                 |                |
| 6     | V\$GATA2_01 | 3       | 4160 | (-) | NNNGATRNNN      | AGCTATGATA     |
| M0012 |             | 0.84834 |      |     |                 |                |
| 8     | V\$GATA1_04 | 6       | 4162 | (+) | NNCWGATARNNNN   | CTATGATAAATAC  |
| M0007 |             |         |      |     |                 |                |
| 5     | V\$GATA1_01 | 0.78233 | 4163 | (+) | SNNGATNNNN      | TATGATAAAT     |
| M0007 |             | 0.82814 |      |     |                 |                |
| 6     | V\$GATA2_01 | 6       | 4163 | (+) | NNNGATRNNN      | TATGATAAAT     |
| M0007 |             | 0.82321 |      |     |                 |                |
| 7     | V\$GATA3_01 | 7       | 4164 | (+) | NNGATARNG       | ATGATAAAT      |
| M0020 |             | 0.95215 |      |     |                 |                |
| 3     | V\$GATA_C   | 9       | 4165 | (+) | NGATAAGNMNN     | TGATAAATACT    |
| M0012 |             | 0.84345 |      |     |                 |                |
| 7     | V\$GATA1_03 | 9       | 4174 | (-) | RNSNNGATAANNNGN | CTGAATATCTTCTT |
| M0012 |             | 0.84160 |      |     |                 |                |
| 8     | V\$GATA1_04 | 5       | 4174 | (-) | NNCWGATARNNNN   | CTGAATATCTTCT  |
| M0007 |             | 0.86080 |      |     |                 |                |
| 5     | V\$GATA1_01 | 9       | 4176 | (-) | SNNGATNNNN      | GAATATCTTC     |
| M0007 |             | 0.90527 |      |     |                 |                |
| 6     | V\$GATA2_01 | 7       | 4176 | (-) | NNNGATRNNN      | GAATATCTTC     |
| M0007 |             | 0.83473 |      |     |                 |                |
| 7     | V\$GATA3_01 | 6       | 4176 | (-) | NNGATARNG       | GAATATCTT      |
| M0012 |             | 0.79887 |      |     |                 |                |
| 7     | V\$GATA1_03 | 3       | 4220 | (-) | RNSNNGATAANNNGN | AATTGTATCCAGAT |
| M0007 |             | 0.78578 |      |     |                 |                |
| 5     | V\$GATA1_01 | 5       | 4222 | (-) | SNNGATNNNN      | TTGTATCCAG     |
| M0012 |             | 0.81156 |      |     |                 |                |
| 6     | V\$GATA1_02 | 2       | 4226 | (+) | NNNNNGATANKGNN  | ATCCAGATACTCAG |
| M0012 |             | 0.89784 |      |     |                 |                |
| 7     | V\$GATA1_03 | 4       | 4226 | (+) | RNSNNGATAANNNGN | ATCCAGATACTCAG |
| M0012 |             | 0.81770 |      |     |                 |                |
| 8     | V\$GATA1_04 | 8       | 4227 | (+) | NNCWGATARNNNN   | TCCAGATACTCAG  |
| M0007 |             | 0.90720 |      |     |                 |                |
| 5     | V\$GATA1_01 | 6       | 4228 | (+) | SNNGATNNNN      | CCAGATACTC     |
| M0007 |             |         |      |     |                 |                |
| 6     | V\$GATA2_01 | 0.91926 | 4228 | (+) | NNNGATRNNN      | CCAGATACTC     |
| M0012 |             | 0.83656 |      |     |                 |                |
| 6     | V\$GATA1_02 | 3       | 4234 | (+) | NNNNNGATANKGNN  | ACTCAGATAGTTGA |
| M0012 |             | 0.81161 |      |     |                 |                |
| 7     | V\$GATA1_03 | 2       | 4234 | (+) | RNSNNGATAANNNGN | ACTCAGATAGTTGA |
| M0012 |             | 0.83057 |      |     |                 |                |
| 8     | V\$GATA1_04 | 6       | 4235 | (+) | NNCWGATARNNNN   | CTCAGATAGTTGA  |
| M0007 |             | 0.88696 |      |     |                 |                |
| 5     | V\$GATA1_01 | 9       | 4236 | (+) | SNNGATNNNN      | TCAGATAGTT     |
| M0007 |             | 0.93910 |      |     |                 |                |
| 6     | V\$GATA2_01 | 7       | 4236 | (+) | NNNGATRNNN      | TCAGATAGTT     |
| M0007 |             | 0.88923 |      |     |                 |                |
| 7     | V\$GATA3_01 | 3       | 4237 | (+) | NNGATARNG       | CAGATAGTT      |
| M0020 |             | 0.83317 |      |     |                 |                |
| 3     | V\$GATA_C   | 8       | 4238 | (+) | NGATAAGNMNN     | AGATAGTTGAT    |

|       |             |         |      |     |                |                |
|-------|-------------|---------|------|-----|----------------|----------------|
| M0007 |             | 0.80355 |      |     |                |                |
| 5     | V\$GATA1_01 | 4       | 4243 | (+) | SNNGATNNNN     | GTTGATTACC     |
| M0012 |             | 0.79103 |      |     |                |                |
| 7     | V\$GATA1_03 | 4       | 4244 | (-) | RNSNNGATAANNGN | TTGATTACCCTCTC |
| M0012 |             | 0.79562 |      |     |                |                |
| 6     | V\$GATA1_02 | 5       | 4249 | (-) | NNNNNGATANKGNN | TACCTCTCACTTC  |
| M0007 |             | 0.85245 |      |     |                |                |
| 7     | V\$GATA3_01 | 9       | 4251 | (-) | NNGATARNG      | CCCTCTCAC      |
| M0012 |             | 0.79568 |      |     |                |                |
| 7     | V\$GATA1_03 | 8       | 4256 | (-) | RNSNNGATAANNGN | TCACTTCTCTGTTT |
| M0012 |             | 0.81280 |      |     |                |                |
| 8     | V\$GATA1_04 | 6       | 4256 | (-) | NNCWGATARNNNN  | TCACTTCTCTGTT  |
| M0012 |             | 0.79470 |      |     |                |                |
| 7     | V\$GATA1_03 | 8       | 4263 | (-) | RNSNNGATAANNGN | TCTGTTTTCATTAC |
| M0012 |             |         |      |     |                |                |
| 6     | V\$GATA1_02 | 0.79    | 4301 | (+) | NNNNNGATANKGNN | CATTGATAAGTAT  |
| M0012 |             | 0.90686 |      |     |                |                |
| 8     | V\$GATA1_04 | 3       | 4302 | (+) | NNCWGATARNNNN  | ATTTGATAAGTAT  |
| M0007 |             | 0.79812 |      |     |                |                |
| 5     | V\$GATA1_01 | 4       | 4303 | (+) | SNNGATNNNN     | TTTGATAAGT     |
| M0007 |             | 0.79296 |      |     |                |                |
| 6     | V\$GATA2_01 | 3       | 4303 | (+) | NNNGATRNNN     | TTTGATAAGT     |
| M0007 |             |         |      |     |                |                |
| 7     | V\$GATA3_01 | 0.83961 | 4304 | (+) | NNGATARNG      | TTGATAAGT      |
| M0020 |             |         |      |     |                |                |
| 3     | V\$GATA_C   | 0.9242  | 4305 | (+) | NGATAAGNMNN    | TGATAAGTATG    |
| M0007 |             | 0.79251 |      |     |                |                |
| 6     | V\$GATA2_01 | 2       | 4353 | (-) | NNNGATRNNN     | AAATATGGTG     |
| M0007 |             | 0.78084 |      |     |                |                |
| 5     | V\$GATA1_01 | 9       | 4369 | (+) | SNNGATNNNN     | TCAGATTTTA     |
| M0007 |             |         |      |     |                |                |
| 6     | V\$GATA2_01 | 0.8083  | 4369 | (+) | NNNGATRNNN     | TCAGATTTTA     |
| M0007 |             | 0.82720 |      |     |                |                |
| 7     | V\$GATA3_01 | 4       | 4370 | (+) | NNGATARNG      | CAGATTTTA      |
| M0007 |             | 0.78084 |      |     |                |                |
| 5     | V\$GATA1_01 | 9       | 4382 | (-) | SNNGATNNNN     | TAAATCATA      |
| M0007 |             | 0.78890 |      |     |                |                |
| 6     | V\$GATA2_01 | 4       | 4382 | (-) | NNNGATRNNN     | TAAATCATA      |
| M0020 |             | 0.84995 |      |     |                |                |
| 3     | V\$GATA_C   | 3       | 4400 | (-) | NGATAAGNMNN    | ACTAATTATCT    |
| M0012 |             | 0.83906 |      |     |                |                |
| 6     | V\$GATA1_02 | 2       | 4401 | (-) | NNNNNGATANKGNN | CTAATTATCTCTTA |
| M0012 |             | 0.79813 |      |     |                |                |
| 7     | V\$GATA1_03 | 8       | 4401 | (-) | RNSNNGATAANNGN | CTAATTATCTCTTA |
| M0012 |             | 0.89246 |      |     |                |                |
| 8     | V\$GATA1_04 | 3       | 4401 | (-) | NNCWGATARNNNN  | CTAATTATCTCTT  |
| M0007 |             | 0.82132 |      |     |                |                |
| 5     | V\$GATA1_01 | 3       | 4403 | (-) | SNNGATNNNN     | AATTATCTCT     |
| M0007 |             |         |      |     |                |                |
| 6     | V\$GATA2_01 | 0.85521 | 4403 | (-) | NNNGATRNNN     | AATTATCTCT     |
| M0007 |             | 0.88391 |      |     |                |                |
| 7     | V\$GATA3_01 | 7       | 4403 | (-) | NNGATARNG      | AATTATCTC      |
| M0012 |             |         |      |     |                |                |
| 7     | V\$GATA1_03 | 0.78001 | 4440 | (+) | RNSNNGATAANNGN | ACCTAAATAAATGG |
| M0012 |             | 0.84742 |      |     |                |                |
| 8     | V\$GATA1_04 | 6       | 4482 | (-) | NNCWGATARNNNN  | CTCCTTTTCTGAC  |
| M0020 |             | 0.90338 |      |     |                |                |
| 3     | V\$GATA_C   | 6       | 4577 | (-) | NGATAAGNMNN    | AAGTATTATCT    |
| M0012 |             | 0.85031 |      |     |                |                |
| 6     | V\$GATA1_02 | 3       | 4578 | (-) | NNNNNGATANKGNN | AGTATTATCTACTT |
| M0012 |             | 0.88265 |      |     |                |                |
| 7     | V\$GATA1_03 | 6       | 4578 | (-) | RNSNNGATAANNGN | AGTATTATCTACTT |
| M0012 |             | 0.86335 |      |     |                |                |
| 8     | V\$GATA1_04 | 8       | 4578 | (-) | NNCWGATARNNNN  | AGTATTATCTACT  |
| M0007 |             | 0.78578 |      |     |                |                |
| 5     | V\$GATA1_01 | 5       | 4580 | (-) | SNNGATNNNN     | TATTATCTAC     |

|       |             |         |      |     |                 |                |
|-------|-------------|---------|------|-----|-----------------|----------------|
| M0007 |             | 0.78258 |      |     |                 |                |
| 6     | V\$GATA2_01 | 9       | 4580 | (-) | NNNGATRNNN      | TATTATCTAC     |
| M0007 |             | 0.87416 |      |     |                 |                |
| 7     | V\$GATA3_01 | 9       | 4580 | (-) | NNGATARNG       | TATTATCTA      |
| M0007 |             | 0.83662 |      |     |                 |                |
| 5     | V\$GATA1_01 | 4       | 4621 | (-) | SNNGATNNNN      | AAAAATCAAC     |
| M0007 |             | 0.87549 |      |     |                 |                |
| 7     | V\$GATA3_01 | 8       | 4800 | (-) | NNGATARNG       | CATAATCTA      |
| M0012 |             | 0.78187 |      |     |                 |                |
| 6     | V\$GATA1_02 | 5       | 4825 | (-) | NNNNNGATANKGNN  | TCCATTCTCATTAT |
| M0012 |             | 0.80450 |      |     |                 |                |
| 7     | V\$GATA1_03 | 8       | 4825 | (-) | RNSNNGATAANNNGN | TCCATTCTCATTAT |
| M0007 |             | 0.78258 |      |     |                 |                |
| 6     | V\$GATA2_01 | 9       | 4833 | (-) | NNNGATRNNN      | CATTATGATG     |
| M0007 |             | 0.81194 |      |     |                 |                |
| 5     | V\$GATA1_01 | 5       | 4836 | (+) | SNNGATNNNN      | TATGATGGAA     |
| M0007 |             |         |      |     |                 |                |
| 6     | V\$GATA2_01 | 0.82138 | 4836 | (+) | NNNGATRNNN      | TATGATGGAA     |
| M0007 |             | 0.82986 |      |     |                 |                |
| 7     | V\$GATA3_01 | 3       | 4837 | (+) | NNGATARNG       | ATGATGGAA      |
| M0020 |             |         |      |     |                 |                |
| 3     | V\$GATA_C   | 0.95278 | 4845 | (-) | NGATAAGNMNN     | ATGTTTTATCT    |
| M0012 |             | 0.87843 |      |     |                 |                |
| 6     | V\$GATA1_02 | 7       | 4846 | (-) | NNNNNGATANKGNN  | TGTTTTATCTCTAC |
| M0012 |             | 0.84051 |      |     |                 |                |
| 7     | V\$GATA1_03 | 9       | 4846 | (-) | RNSNNGATAANNNGN | TGTTTTATCTCTAC |
| M0012 |             | 0.88786 |      |     |                 |                |
| 8     | V\$GATA1_04 | 8       | 4846 | (-) | NNCWGATARNNNN   | TGTTTTATCTCTA  |
| M0007 |             | 0.78529 |      |     |                 |                |
| 6     | V\$GATA2_01 | 5       | 4848 | (-) | NNNGATRNNN      | TTTTATCTCT     |
| M0007 |             | 0.89587 |      |     |                 |                |
| 7     | V\$GATA3_01 | 9       | 4848 | (-) | NNGATARNG       | TTTTATCTC      |
| M0007 |             | 0.85192 |      |     |                 |                |
| 5     | V\$GATA1_01 | 5       | 4866 | (+) | SNNGATNNNN      | CTGGATGTGT     |
| M0007 |             | 0.81416 |      |     |                 |                |
| 6     | V\$GATA2_01 | 3       | 4866 | (+) | NNNGATRNNN      | CTGGATGTGT     |
| M0020 |             | 0.88692 |      |     |                 |                |
| 3     | V\$GATA_C   | 1       | 4938 | (+) | NGATAAGNMNN     | AGACAAGTATT    |
| M0007 |             | 0.85378 |      |     |                 |                |
| 7     | V\$GATA3_01 | 8       | 4952 | (+) | NNGATARNG       | AAGATTTGA      |
| M0012 |             | 0.83937 |      |     |                 |                |
| 6     | V\$GATA1_02 | 5       | 4954 | (+) | NNNNNGATANKGNN  | GATTTGATAGGCAA |
| M0012 |             | 0.87316 |      |     |                 |                |
| 8     | V\$GATA1_04 | 2       | 4955 | (+) | NNCWGATARNNNN   | ATTTGATAGGCAA  |
| M0007 |             |         |      |     |                 |                |
| 5     | V\$GATA1_01 | 0.84847 | 4956 | (+) | SNNGATNNNN      | TTTGATAGGC     |
| M0007 |             | 0.84077 |      |     |                 |                |
| 6     | V\$GATA2_01 | 6       | 4956 | (+) | NNNGATRNNN      | TTTGATAGGC     |
| M0007 |             | 0.86796 |      |     |                 |                |
| 7     | V\$GATA3_01 | 6       | 4957 | (+) | NNGATARNG       | TTGATAGGC      |
| M0020 |             |         |      |     |                 |                |
| 3     | V\$GATA_C   | 0.90028 | 4958 | (+) | NGATAAGNMNN     | TGATAGGCAAC    |
| M0007 |             | 0.80799 |      |     |                 |                |
| 5     | V\$GATA1_01 | 6       | 4982 | (+) | SNNGATNNNN      | AATGATTTTT     |
| M0007 |             | 0.78619 |      |     |                 |                |
| 6     | V\$GATA2_01 | 8       | 4982 | (+) | NNNGATRNNN      | AATGATTTTT     |
| M0007 |             | 0.86486 |      |     |                 |                |
| 7     | V\$GATA3_01 | 5       | 4994 | (-) | NNGATARNG       | TATAATCTT      |
| M0012 |             | 0.79397 |      |     |                 |                |
| 7     | V\$GATA1_03 | 4       | 5033 | (+) | RNSNNGATAANNNGN | GGAAAGTAAGAAA  |
| M0020 |             | 0.83069 |      |     |                 |                |
| 3     | V\$GATA_C   | 3       | 5037 | (+) | NGATAAGNMNN     | AGGTAAGAAAT    |
| M0007 |             | 0.77492 |      |     |                 |                |
| 5     | V\$GATA1_01 | 6       | 5102 | (+) | SNNGATNNNN      | GGTGTTATGC     |
| M0007 |             | 0.78349 |      |     |                 |                |
| 6     | V\$GATA2_01 | 1       | 5104 | (-) | NNNGATRNNN      | TGTTATGCCA     |

|       |             |         |      |     |                |                |
|-------|-------------|---------|------|-----|----------------|----------------|
| M0007 |             | 0.83662 |      |     |                |                |
| 5     | V\$GATA1_01 | 4       | 5136 | (-) | SNNGATNNNN     | AAAAATCACT     |
| M0007 |             | 0.79431 |      |     |                |                |
| 6     | V\$GATA2_01 | 7       | 5136 | (-) | NNNGATRNNN     | AAAAATCACT     |
| M0007 |             | 0.79318 |      |     |                |                |
| 5     | V\$GATA1_01 | 9       | 5177 | (+) | SNNGATNNNN     | AGAGATGAAG     |
| M0007 |             | 0.79972 |      |     |                |                |
| 6     | V\$GATA2_01 | 9       | 5177 | (+) | NNNGATRNNN     | AGAGATGAAG     |
| M0007 |             | 0.87727 |      |     |                |                |
| 7     | V\$GATA3_01 | 1       | 5178 | (+) | NNGATARNG      | GAGATGAAG      |
| M0012 |             | 0.79312 |      |     |                |                |
| 6     | V\$GATA1_02 | 5       | 5181 | (+) | NNNNNGATANKGNN | ATGAAGATAACTCA |
| M0012 |             | 0.91254 |      |     |                |                |
| 7     | V\$GATA1_03 | 3       | 5181 | (+) | RNSNNGATAANNGN | ATGAAGATAACTCA |
| M0012 |             | 0.88449 |      |     |                |                |
| 8     | V\$GATA1_04 | 8       | 5182 | (+) | NNCWGATARNNNN  | TGAAGATAACTCA  |
| M0007 |             | 0.85735 |      |     |                |                |
| 5     | V\$GATA1_01 | 4       | 5183 | (+) | SNNGATNNNN     | GAAGATAACT     |
| M0007 |             | 0.91294 |      |     |                |                |
| 6     | V\$GATA2_01 | 5       | 5183 | (+) | NNNGATRNNN     | GAAGATAACT     |
| M0007 |             | 0.85068 |      |     |                |                |
| 7     | V\$GATA3_01 | 7       | 5184 | (+) | NNGATARNG      | AAGATAACT      |
| M0020 |             | 0.87014 |      |     |                |                |
| 3     | V\$GATA_C   | 6       | 5185 | (+) | NGATAAGNMNN    | AGATAACTCAG    |
| M0007 |             | 0.78755 |      |     |                |                |
| 6     | V\$GATA2_01 | 1       | 5196 | (-) | NNNGATRNNN     | AACTATGACT     |
| M0012 |             | 0.78931 |      |     |                |                |
| 7     | V\$GATA1_03 | 9       | 5208 | (+) | RNSNNGATAANNGN | AACAAGATGAAAGA |
| M0007 |             | 0.78677 |      |     |                |                |
| 5     | V\$GATA1_01 | 2       | 5210 | (+) | SNNGATNNNN     | CAAGATGAAA     |
| M0007 |             | 0.79025 |      |     |                |                |
| 6     | V\$GATA2_01 | 7       | 5210 | (+) | NNNGATRNNN     | CAAGATGAAA     |
| M0007 |             | 0.82498 |      |     |                |                |
| 7     | V\$GATA3_01 | 9       | 5211 | (+) | NNGATARNG      | AAGATGAAA      |
| M0012 |             | 0.84468 |      |     |                |                |
| 6     | V\$GATA1_02 | 8       | 5215 | (+) | NNNNNGATANKGNN | TGAAAGATAATAAT |
| M0012 |             | 0.81724 |      |     |                |                |
| 7     | V\$GATA1_03 | 6       | 5215 | (+) | RNSNNGATAANNGN | TGAAAGATAATAAT |
| M0012 |             | 0.88970 |      |     |                |                |
| 8     | V\$GATA1_04 | 6       | 5216 | (+) | NNCWGATARNNNN  | GAAAGATAATAAT  |
| M0007 |             | 0.81732 |      |     |                |                |
| 6     | V\$GATA2_01 | 1       | 5217 | (+) | NNNGATRNNN     | AAAGATAATA     |
| M0007 |             | 0.89853 |      |     |                |                |
| 7     | V\$GATA3_01 | 8       | 5218 | (+) | NNGATARNG      | AAGATAATA      |
| M0012 |             | 0.82116 |      |     |                |                |
| 7     | V\$GATA1_03 | 6       | 5218 | (+) | RNSNNGATAANNGN | AAGATAATAATAGT |
| M0020 |             | 0.89251 |      |     |                |                |
| 3     | V\$GATA_C   | 3       | 5219 | (+) | NGATAAGNMNN    | AGATAATAATA    |
| M0012 |             | 0.85031 |      |     |                |                |
| 6     | V\$GATA1_02 | 3       | 5312 | (+) | NNNNNGATANKGNN | AAGGAGATAATACA |
| M0012 |             | 0.89882 |      |     |                |                |
| 7     | V\$GATA1_03 | 4       | 5312 | (+) | RNSNNGATAANNGN | AAGGAGATAATACA |
| M0012 |             | 0.88235 |      |     |                |                |
| 8     | V\$GATA1_04 | 3       | 5313 | (+) | NNCWGATARNNNN  | AGGAGATAATACA  |
| M0007 |             | 0.85044 |      |     |                |                |
| 5     | V\$GATA1_01 | 4       | 5314 | (+) | SNNGATNNNN     | GGAGATAATA     |
| M0007 |             |         |      |     |                |                |
| 6     | V\$GATA2_01 | 0.87235 | 5314 | (+) | NNNGATRNNN     | GGAGATAATA     |
| M0007 |             | 0.91581 |      |     |                |                |
| 7     | V\$GATA3_01 | 7       | 5315 | (+) | NNGATARNG      | GAGATAATA      |
| M0020 |             |         |      |     |                |                |
| 3     | V\$GATA_C   | 0.90028 | 5316 | (+) | NGATAAGNMNN    | AGATAATACAA    |
| M0007 |             | 0.80108 |      |     |                |                |
| 5     | V\$GATA1_01 | 6       | 5400 | (+) | SNNGATNNNN     | TAAGATACAT     |
| M0007 |             | 0.86558 |      |     |                |                |
| 6     | V\$GATA2_01 | 4       | 5400 | (+) | NNNGATRNNN     | TAAGATACAT     |



|       |             |         |      |     |                |                |
|-------|-------------|---------|------|-----|----------------|----------------|
| M0020 |             | 0.83628 |      |     |                |                |
| 3     | V\$GATA_C   | 5       | 5402 | (+) | NGATAAGNMNN    | AGATACATTTTC   |
| M0007 |             | 0.77591 |      |     |                |                |
| 5     | V\$GATA1_01 | 3       | 5426 | (+) | SNNGATNNNN     | TTTGATGGAA     |
| M0012 |             | 0.82680 |      |     |                |                |
| 7     | V\$GATA1_03 | 1       | 5447 | (-) | RNSNNGATAANNGN | TTTATTATATTCAT |
| M0012 |             | 0.82680 |      |     |                |                |
| 7     | V\$GATA1_03 | 1       | 5456 | (-) | RNSNNGATAANNGN | TTCATTTTCTCCAT |
| M0020 |             | 0.85616 |      |     |                |                |
| 3     | V\$GATA_C   | 7       | 5487 | (-) | NGATAAGNMNN    | ACATTTTATCT    |
| M0012 |             |         |      |     |                |                |
| 6     | V\$GATA1_02 | 0.86625 | 5488 | (-) | NNNNNGATANKGNN | CATTTTATCTTTAC |
| M0012 |             | 0.85668 |      |     |                |                |
| 7     | V\$GATA1_03 | 8       | 5488 | (-) | RNSNNGATAANNGN | CATTTTATCTTTAC |
| M0012 |             | 0.87622 |      |     |                |                |
| 8     | V\$GATA1_04 | 5       | 5488 | (-) | NNCWGATARNNNN  | CATTTTATCTTTA  |
| M0007 |             |         |      |     |                |                |
| 7     | V\$GATA3_01 | 0.8786  | 5490 | (-) | NNGATARNG      | TTTTATCTT      |
| M0012 |             |         |      |     |                |                |
| 6     | V\$GATA1_02 | 0.8425  | 5497 | (-) | NNNNNGATANKGNN | TTTACTATCTTGCA |
| M0012 |             | 0.80989 |      |     |                |                |
| 7     | V\$GATA1_03 | 7       | 5497 | (-) | RNSNNGATAANNGN | TTTACTATCTTGCA |
| M0012 |             | 0.86519 |      |     |                |                |
| 8     | V\$GATA1_04 | 6       | 5497 | (-) | NNCWGATARNNNN  | TTTACTATCTTGC  |
| M0007 |             | 0.89141 |      |     |                |                |
| 5     | V\$GATA1_01 | 2       | 5499 | (-) | SNNGATNNNN     | TACTATCTTG     |
| M0007 |             | 0.91023 |      |     |                |                |
| 6     | V\$GATA2_01 | 9       | 5499 | (-) | NNNGATRNNN     | TACTATCTTG     |
| M0007 |             | 0.92689 |      |     |                |                |
| 7     | V\$GATA3_01 | 4       | 5499 | (-) | NNGATARNG      | TACTATCTT      |
| M0020 |             |         |      |     |                |                |
| 3     | V\$GATA_C   | 0.89593 | 5506 | (-) | NGATAAGNMNN    | TTGCATTATCA    |
| M0012 |             | 0.84281 |      |     |                |                |
| 6     | V\$GATA1_02 | 2       | 5507 | (-) | NNNNNGATANKGNN | TGCATTATCAAATG |
| M0012 |             | 0.86243 |      |     |                |                |
| 8     | V\$GATA1_04 | 9       | 5507 | (-) | NNCWGATARNNNN  | TGCATTATCAAAT  |
| M0007 |             | 0.79713 |      |     |                |                |
| 5     | V\$GATA1_01 | 7       | 5509 | (-) | SNNGATNNNN     | CATTATCAAA     |
| M0007 |             | 0.79972 |      |     |                |                |
| 6     | V\$GATA2_01 | 9       | 5509 | (-) | NNNGATRNNN     | CATTATCAAA     |
| M0007 |             | 0.88568 |      |     |                |                |
| 7     | V\$GATA3_01 | 9       | 5509 | (-) | NNGATARNG      | CATTATCAA      |
| M0012 |             | 0.80450 |      |     |                |                |
| 7     | V\$GATA1_03 | 8       | 5560 | (+) | RNSNNGATAANNGN | GTGGAGAAAGCTGT |
| M0007 |             | 0.77838 |      |     |                |                |
| 5     | V\$GATA1_01 | 1       | 5562 | (+) | SNNGATNNNN     | GGAGAAAGCT     |
| M0012 |             | 0.79397 |      |     |                |                |
| 7     | V\$GATA1_03 | 4       | 5602 | (+) | RNSNNGATAANNGN | AGCTTGATGATGAA |
| M0007 |             | 0.85784 |      |     |                |                |
| 5     | V\$GATA1_01 | 8       | 5604 | (+) | SNNGATNNNN     | CTTGATGATG     |
| M0007 |             | 0.78033 |      |     |                |                |
| 6     | V\$GATA2_01 | 4       | 5604 | (+) | NNNGATRNNN     | CTTGATGATG     |
| M0007 |             | 0.83207 |      |     |                |                |
| 7     | V\$GATA3_01 | 8       | 5605 | (+) | NNGATARNG      | TTGATGATG      |
| M0007 |             |         |      |     |                |                |
| 5     | V\$GATA1_01 | 0.80306 | 5607 | (+) | SNNGATNNNN     | GATGATGAAA     |
| M0007 |             | 0.78439 |      |     |                |                |
| 6     | V\$GATA2_01 | 3       | 5607 | (+) | NNNGATRNNN     | GATGATGAAA     |
| M0012 |             | 0.81504 |      |     |                |                |
| 7     | V\$GATA1_03 | 2       | 5608 | (+) | RNSNNGATAANNGN | ATGATGAAAACGCC |
| M0012 |             |         |      |     |                |                |
| 6     | V\$GATA1_02 | 0.775   | 5633 | (+) | NNNNNGATANKGNN | TTATAGATATCCAT |
| M0007 |             |         |      |     |                |                |
| 6     | V\$GATA2_01 | 0.79567 | 5635 | (+) | NNNGATRNNN     | ATAGATATCC     |
| M0007 |             | 0.77048 |      |     |                |                |
| 5     | V\$GATA1_01 | 4       | 5637 | (-) | SNNGATNNNN     | AGATATCCAT     |

|       |             |         |      |     |                |                 |
|-------|-------------|---------|------|-----|----------------|-----------------|
| M0007 |             | 0.81371 |      |     |                |                 |
| 6     | V\$GATA2_01 | 2       | 5637 | (-) | NNNGATRNNN     | AGATATCCAT      |
| M0012 |             | 0.81014 |      |     |                |                 |
| 7     | V\$GATA1_03 | 2       | 5663 | (-) | RNSNNGATAANNGN | CTTCTTTTCTGTCC  |
| M0012 |             | 0.82322 |      |     |                |                 |
| 8     | V\$GATA1_04 | 3       | 5663 | (-) | NNCWGATARNNNN  | CTTCTTTTCTGTC   |
| M0012 |             | 0.82680 |      |     |                |                 |
| 7     | V\$GATA1_03 | 1       | 5700 | (+) | RNSNNGATAANNGN | AGCAAGGTAAGGAA  |
| M0012 |             | 0.82263 |      |     |                |                 |
| 7     | V\$GATA1_03 | 6       | 5709 | (+) | RNSNNGATAANNGN | AGGAACATAAATGA  |
| M0012 |             | 0.78218 |      |     |                |                 |
| 6     | V\$GATA1_02 | 8       | 5716 | (+) | NNNNNGATANKGNN | TAAATGATATTTAA  |
| M0012 |             | 0.81832 |      |     |                |                 |
| 8     | V\$GATA1_04 | 1       | 5717 | (+) | NNCWGATARNNNN  | AAATGATATTTAA   |
| M0007 |             | 0.83168 |      |     |                |                 |
| 5     | V\$GATA1_01 | 8       | 5718 | (+) | SNNGATNNNN     | AATGATATTT      |
| M0007 |             | 0.85069 |      |     |                |                 |
| 6     | V\$GATA2_01 | 9       | 5718 | (+) | NNNGATRNNN     | AATGATATTT      |
| M0020 |             | 0.85523 |      |     |                |                 |
| 3     | V\$GATA_C   | 5       | 5737 | (-) | NGATAAGNMNN    | TAAAGTTATCT     |
| M0012 |             | 0.79343 |      |     |                |                 |
| 6     | V\$GATA1_02 | 8       | 5738 | (-) | NNNNNGATANKGNN | AAAGTTATCTCAAA  |
| M0012 |             | 0.86335 |      |     |                |                 |
| 8     | V\$GATA1_04 | 8       | 5738 | (-) | NNCWGATARNNNN  | AAAGTTATCTCAA   |
| M0007 |             | 0.82971 |      |     |                |                 |
| 5     | V\$GATA1_01 | 4       | 5740 | (-) | SNNGATNNNN     | AGTTATCTCA      |
| M0007 |             | 0.90663 |      |     |                |                 |
| 6     | V\$GATA2_01 | 1       | 5740 | (-) | NNNGATRNNN     | AGTTATCTCA      |
| M0007 |             | 0.86796 |      |     |                |                 |
| 7     | V\$GATA3_01 | 6       | 5740 | (-) | NNGATARNG      | AGTTATCTC       |
| M0007 |             | 0.82773 |      |     |                |                 |
| 5     | V\$GATA1_01 | 9       | 5748 | (-) | SNNGATNNNN     | CAAAATCATA      |
| M0007 |             | 0.83175 |      |     |                |                 |
| 6     | V\$GATA2_01 | 5       | 5748 | (-) | NNNGATRNNN     | CAAAATCATA      |
| M0007 |             | 0.84448 |      |     |                |                 |
| 7     | V\$GATA3_01 | 4       | 5748 | (-) | NNGATARNG      | CAAAATCAT       |
| M0007 |             | 0.83119 |      |     |                |                 |
| 5     | V\$GATA1_01 | 4       | 5772 | (+) | SNNGATNNNN     | ATTGATTGGT      |
| M0007 |             | 0.83429 |      |     |                |                 |
| 7     | V\$GATA3_01 | 3       | 5773 | (+) | NNGATARNG      | TTGATTGGT       |
| M0012 |             | 0.78515 |      |     |                |                 |
| 7     | V\$GATA1_03 | 4       | 5818 | (+) | RNSNNGATAANNGN | ATGAAAATACGAAA  |
| M0007 |             | 0.79521 |      |     |                |                 |
| 6     | V\$GATA2_01 | 9       | 5839 | (-) | NNNGATRNNN     | TGGTATGTCA      |
| M0007 |             | 0.81095 |      |     |                |                 |
| 5     | V\$GATA1_01 | 8       | 5931 | (+) | SNNGATNNNN     | ACTGATGAGA      |
| M0007 |             | 0.79206 |      |     |                |                 |
| 6     | V\$GATA2_01 | 1       | 5931 | (+) | NNNGATRNNN     | ACTGATGAGA      |
| M0007 |             | 0.83650 |      |     |                |                 |
| 7     | V\$GATA3_01 | 9       | 5932 | (+) | NNGATARNG      | CTGATGAGA       |
| M0007 |             | 0.79431 |      |     |                |                 |
| 6     | V\$GATA2_01 | 7       | 5936 | (+) | NNNGATRNNN     | TGAGATCTAC      |
| M0007 |             | 0.80063 |      |     |                |                 |
| 6     | V\$GATA2_01 | 1       | 5985 | (-) | NNNGATRNNN     | AACCATGAGG      |
| M0012 |             |         |      |     |                |                 |
| 7     | V\$GATA1_03 | 0.78001 | 5989 | (+) | RNSNNGATAANNGN | ATGAGGAGACAAGG  |
| M0012 |             | 0.78031 |      |     |                |                 |
| 6     | V\$GATA1_02 | 2       | 5991 | (+) | NNNNNGATANKGNN | GAGGAGACAAGGCA  |
| M0020 |             | 0.89996 |      |     |                |                 |
| 3     | V\$GATA_C   | 9       | 5995 | (+) | NGATAAGNMNN    | AGACAAGGCAT     |
| M0012 |             | 0.82812 |      |     |                |                 |
| 6     | V\$GATA1_02 | 5       | 6020 | (+) | NNNNNGATANKGNN | GAATGGATAAAAAGA |
| M0012 |             | 0.84370 |      |     |                |                 |
| 7     | V\$GATA1_03 | 4       | 6020 | (+) | RNSNNGATAANNGN | GAATGGATAAAAAGA |
| M0020 |             | 0.90090 |      |     |                |                 |
| 3     | V\$GATA_C   | 1       | 6024 | (+) | NGATAAGNMNN    | GGATAAAAAGAA    |

|       |             |         |      |     |                |                |
|-------|-------------|---------|------|-----|----------------|----------------|
| M0012 |             | 0.78466 |      |     |                |                |
| 7     | V\$GATA1_03 | 4       | 6059 | (-) | RNSNNGATAANNGN | CAGACTATTTTCAC |
| M0007 |             | 0.83316 |      |     |                |                |
| 5     | V\$GATA1_01 | 9       | 6071 | (+) | SNNGATNNNN     | ACTGATCGCC     |
| M0007 |             | 0.86179 |      |     |                |                |
| 5     | V\$GATA1_01 | 7       | 6071 | (-) | SNNGATNNNN     | ACTGATCGCC     |
| M0007 |             | 0.84618 |      |     |                |                |
| 6     | V\$GATA2_01 | 9       | 6071 | (+) | NNNGATRNNN     | ACTGATCGCC     |
| M0007 |             | 0.84077 |      |     |                |                |
| 6     | V\$GATA2_01 | 6       | 6071 | (-) | NNNGATRNNN     | ACTGATCGCC     |
| M0012 |             |         |      |     |                |                |
| 8     | V\$GATA1_04 | 0.85723 | 6118 | (-) | NNCWGATARNNNN  | CAATATATCTGCT  |
| M0007 |             | 0.85686 |      |     |                |                |
| 5     | V\$GATA1_01 | 1       | 6120 | (-) | SNNGATNNNN     | ATATATCTGC     |
| M0007 |             | 0.87686 |      |     |                |                |
| 6     | V\$GATA2_01 | 1       | 6120 | (-) | NNNGATRNNN     | ATATATCTGC     |
| M0007 |             | 0.80799 |      |     |                |                |
| 5     | V\$GATA1_01 | 6       | 6155 | (+) | SNNGATNNNN     | AATGATTTTT     |
| M0007 |             | 0.78619 |      |     |                |                |
| 6     | V\$GATA2_01 | 8       | 6155 | (+) | NNNGATRNNN     | AATGATTTTT     |
| M0012 |             | 0.78656 |      |     |                |                |
| 6     | V\$GATA1_02 | 3       | 6303 | (+) | NNNNNGATANKGNN | GGCAGGATATTGGG |
| M0012 |             | 0.83978 |      |     |                |                |
| 7     | V\$GATA1_03 | 4       | 6303 | (+) | RNSNNGATAANNGN | GGCAGGATATTGGG |
| M0007 |             | 0.88696 |      |     |                |                |
| 5     | V\$GATA1_01 | 9       | 6305 | (+) | SNNGATNNNN     | CAGGATATTG     |
| M0007 |             | 0.93098 |      |     |                |                |
| 6     | V\$GATA2_01 | 8       | 6305 | (+) | NNNGATRNNN     | CAGGATATTG     |
| M0007 |             | 0.85644 |      |     |                |                |
| 7     | V\$GATA3_01 | 7       | 6306 | (+) | NNGATARNG      | AGGATATTG      |
| M0007 |             | 0.80355 |      |     |                |                |
| 5     | V\$GATA1_01 | 4       | 6318 | (-) | SNNGATNNNN     | GTGAATCAAC     |
| M0007 |             | 0.81688 |      |     |                |                |
| 5     | V\$GATA1_01 | 1       | 6333 | (+) | SNNGATNNNN     | TAAGATTCTT     |
| M0007 |             | 0.84122 |      |     |                |                |
| 6     | V\$GATA2_01 | 7       | 6333 | (+) | NNNGATRNNN     | TAAGATTCTT     |
| M0012 |             | 0.78312 |      |     |                |                |
| 6     | V\$GATA1_02 | 5       | 6361 | (+) | NNNNNGATANKGNN | TATAATATAAGGGA |
| M0012 |             | 0.81770 |      |     |                |                |
| 8     | V\$GATA1_04 | 8       | 6362 | (+) | NNCWGATARNNNN  | ATAATATAAGGGA  |
| M0012 |             | 0.81161 |      |     |                |                |
| 7     | V\$GATA1_03 | 2       | 6370 | (+) | RNSNNGATAANNGN | AGGGAAATAAAGAA |
| M0007 |             | 0.81490 |      |     |                |                |
| 5     | V\$GATA1_01 | 6       | 6389 | (-) | SNNGATNNNN     | AAATATCCTA     |
| M0007 |             | 0.90888 |      |     |                |                |
| 6     | V\$GATA2_01 | 6       | 6389 | (-) | NNNGATRNNN     | AAATATCCTA     |
| M0007 |             | 0.78578 |      |     |                |                |
| 5     | V\$GATA1_01 | 5       | 6395 | (-) | SNNGATNNNN     | CCTAATCAAA     |
| M0007 |             |         |      |     |                |                |
| 7     | V\$GATA3_01 | 0.87284 | 6395 | (-) | NNGATARNG      | CCTAATCAA      |
| M0012 |             | 0.78437 |      |     |                |                |
| 6     | V\$GATA1_02 | 5       | 6400 | (-) | NNNNNGATANKGNN | TCAAATATCCTTTA |
| M0007 |             | 0.80651 |      |     |                |                |
| 5     | V\$GATA1_01 | 5       | 6402 | (-) | SNNGATNNNN     | AAATATCCTT     |
| M0007 |             |         |      |     |                |                |
| 6     | V\$GATA2_01 | 0.87641 | 6402 | (-) | NNNGATRNNN     | AAATATCCTT     |
| M0007 |             |         |      |     |                |                |
| 5     | V\$GATA1_01 | 0.83613 | 6413 | (-) | SNNGATNNNN     | AAGTATCCTA     |
| M0007 |             | 0.92016 |      |     |                |                |
| 6     | V\$GATA2_01 | 2       | 6413 | (-) | NNNGATRNNN     | AAGTATCCTA     |
| M0007 |             | 0.78578 |      |     |                |                |
| 5     | V\$GATA1_01 | 5       | 6419 | (-) | SNNGATNNNN     | CCTAATCAAA     |
| M0007 |             |         |      |     |                |                |
| 7     | V\$GATA3_01 | 0.87284 | 6419 | (-) | NNGATARNG      | CCTAATCAA      |
| M0020 |             | 0.84405 |      |     |                |                |
| 3     | V\$GATA_C   | 1       | 6449 | (+) | NGATAAGNMNN    | GGACAAAACCTA   |

|       |             |         |      |     |                        |                         |
|-------|-------------|---------|------|-----|------------------------|-------------------------|
| M0012 |             | 0.87193 |      |     |                        |                         |
| 8     | V\$GATA1_04 | 6       | 6461 | (+) | NNCWGATARNNNN          | AACAGATATCTCT           |
| M0007 |             | 0.83168 |      |     |                        |                         |
| 5     | V\$GATA1_01 | 8       | 6462 | (+) | SNNGATNNNN             | ACAGATATCT              |
| M0007 |             | 0.88903 |      |     |                        |                         |
| 6     | V\$GATA2_01 | 9       | 6462 | (+) | NNNGATRNNN             | ACAGATATCT              |
| M0012 |             |         |      |     |                        |                         |
| 6     | V\$GATA1_02 | 0.81125 | 6462 | (-) | NNNNNGATANKGNN         | ACAGATATCTCTAA          |
| M0012 |             | 0.83578 |      |     |                        |                         |
| 8     | V\$GATA1_04 | 4       | 6462 | (-) | NNCWGATARNNNN          | ACAGATATCTCTA           |
| M0007 |             | 0.83958 |      |     |                        |                         |
| 5     | V\$GATA1_01 | 5       | 6464 | (-) | SNNGATNNNN             | AGATATCTCT              |
| M0007 |             | 0.88903 |      |     |                        |                         |
| 6     | V\$GATA2_01 | 9       | 6464 | (-) | NNNGATRNNN             | AGATATCTCT              |
| M0007 |             | 0.83606 |      |     |                        |                         |
| 7     | V\$GATA3_01 | 6       | 6464 | (-) | NNGATARNG              | AGATATCTC               |
| M0012 |             | 0.88804 |      |     |                        |                         |
| 7     | V\$GATA1_03 | 5       | 6517 | (+) | RNSNNGATAANNGN         | GGCTGGATAACTAA          |
| M0007 |             | 0.82132 |      |     |                        |                         |
| 5     | V\$GATA1_01 | 3       | 6519 | (+) | SNNGATNNNN             | CTGGATAACT              |
| M0007 |             | 0.84032 |      |     |                        |                         |
| 6     | V\$GATA2_01 | 5       | 6519 | (+) | NNNGATRNNN             | CTGGATAACT              |
| M0020 |             | 0.88288 |      |     |                        |                         |
| 3     | V\$GATA_C   | 3       | 6521 | (+) | NGATAAGNMNN            | GGATAACTAAA             |
| M0007 |             | 0.80243 |      |     |                        |                         |
| 6     | V\$GATA2_01 | 6       | 6533 | (+) | NNNGATRNNN             | CAACATAGTA              |
| M0007 |             | 0.85439 |      |     |                        |                         |
| 5     | V\$GATA1_01 | 3       | 6563 | (-) | SNNGATNNNN             | GAGCATCTCA              |
| M0007 |             | 0.88182 |      |     |                        |                         |
| 6     | V\$GATA2_01 | 2       | 6563 | (-) | NNNGATRNNN             | GAGCATCTCA              |
| M0007 |             | 0.82363 |      |     |                        |                         |
| 6     | V\$GATA2_01 | 6       | 6586 | (-) | NNNGATRNNN             | TGCTATGGTC              |
| M0012 |             | 0.79250 |      |     |                        |                         |
| 7     | V\$GATA1_03 | 4       | 6621 | (+) | RNSNNGATAANNGN         | ATGGAGAAAATTCA          |
| M0007 |             | 0.79220 |      |     |                        |                         |
| 5     | V\$GATA1_01 | 1       | 6651 | (-) | SNNGATNNNN             | ATACATCATT              |
| M0007 |             | 0.78213 |      |     |                        |                         |
| 6     | V\$GATA2_01 | 8       | 6651 | (-) | NNNGATRNNN             | ATACATCATT              |
| M0020 |             | 0.93227 |      |     |                        |                         |
| 3     | V\$GATA_C   | 7       | 6681 | (-) | NGATAAGNMNN            | TTTATTATCA              |
| M0012 |             | 0.90257 |      |     |                        |                         |
| 8     | V\$GATA1_04 | 4       | 6682 | (-) | NNCWGATARNNNN          | TTATTATCACAT            |
| M0007 |             | 0.81095 |      |     |                        |                         |
| 5     | V\$GATA1_01 | 8       | 6684 | (-) | SNNGATNNNN             | ATTTATCACA              |
| M0007 |             | 0.83626 |      |     |                        |                         |
| 6     | V\$GATA2_01 | 5       | 6684 | (-) | NNNGATRNNN             | ATTTATCACA              |
| M0007 |             | 0.84049 |      |     |                        |                         |
| 7     | V\$GATA3_01 | 6       | 6684 | (-) | NNGATARNG              | ATTTATCAC               |
| M0012 |             | 0.78031 |      |     |                        |                         |
| 6     | V\$GATA1_02 | 2       | 6690 | (-) | NNNNNGATANKGNN         | CACATAATCTTTAA          |
| M0007 |             | 0.78035 |      |     |                        |                         |
| 5     | V\$GATA1_01 | 5       | 6692 | (-) | SNNGATNNNN             | CATAATCTTT              |
| M0007 |             |         |      |     |                        |                         |
| 6     | V\$GATA2_01 | 0.79567 | 6692 | (-) | NNNGATRNNN             | CATAATCTTT              |
| M0007 |             | 0.89986 |      |     |                        |                         |
| 7     | V\$GATA3_01 | 7       | 6692 | (-) | NNGATARNG              | CATAATCTT               |
| M0007 |             | 0.77245 |      |     |                        |                         |
| 5     | V\$GATA1_01 | 8       | 6749 | (+) | SNNGATNNNN             | GAAGTTAGGC              |
| M0007 |             | 0.78845 |      |     |                        |                         |
| 6     | V\$GATA2_01 | 3       | 6749 | (+) | NNNGATRNNN             | GAAGTTAGGC              |
| M0016 |             | 0.80820 |      |     |                        |                         |
| 2     | V\$OCT1_06  | 3       | 53   | (+) | CWNAWTKWSATRYN         | AATTCTTAGAATTT          |
| M0013 |             | 0.91070 |      |     | NNNNNNNWATGCAAATNNNWNN |                         |
| 8     | V\$OCT1_04  | 7       | 56   | (-) | W                      | TCTTAGAATTTAAATAAACCTGT |
| M0013 |             |         |      |     |                        |                         |
| 5     | V\$OCT1_01  | 0.78367 | 58   | (-) | NNNNWTATGCAAATNTNNN    | TTAGAATTTAAATAAACCT     |

|       |            |         |     |     |                        |                          |
|-------|------------|---------|-----|-----|------------------------|--------------------------|
| M0016 |            | 0.83984 |     |     |                        |                          |
| 2     | V\$OCT1_06 | 4       | 60  | (+) | CWNAWTKWSATRYN         | AGAATTTAAATAAA           |
| M0016 |            | 0.86054 |     |     |                        |                          |
| 2     | V\$OCT1_06 | 7       | 60  | (-) | CWNAWTKWSATRYN         | AGAATTTAAATAAA           |
| M0024 |            |         |     |     |                        |                          |
| 8     | V\$OCT1_07 | 0.90566 | 62  | (-) | TNTATGNTAATT           | AATTTAAATAAA             |
| M0016 |            | 0.80039 |     |     |                        |                          |
| 2     | V\$OCT1_06 | 1       | 89  | (-) | CWNAWTKWSATRYN         | GAAACCACAAAATT           |
| M0013 |            | 0.85319 |     |     | NNNNNNNWATGCAAATNNNWNN | CCACAAAATTAGCATTTTACT-AA |
| 8     | V\$OCT1_04 | 9       | 93  | (-) | W                      |                          |
| M0013 |            | 0.86703 |     |     |                        |                          |
| 5     | V\$OCT1_01 | 5       | 95  | (-) | NNNNWTATGCAAATNTNNN    | ACAAAATTAGCATTTTACT      |
| M0016 |            | 0.89158 |     |     |                        |                          |
| 1     | V\$OCT1_05 | 2       | 97  | (+) | MKNATTTGCATAYY         | AAAATTAGCATTTT           |
| M0016 |            | 0.84765 |     |     |                        |                          |
| 2     | V\$OCT1_06 | 6       | 97  | (+) | CWNAWTKWSATRYN         | AAAATTAGCATTTT           |
| M0013 |            | 0.80129 |     |     |                        |                          |
| 6     | V\$OCT1_02 | 9       | 99  | (-) | NNGAATATKCANNNN        | AATTAGCATTTTACT          |
| M0024 |            | 0.92177 |     |     |                        |                          |
| 8     | V\$OCT1_07 | 2       | 99  | (-) | TNTATGNTAATT           | AATTAGCATTTT             |
| M0013 |            | 0.88858 |     |     |                        |                          |
| 7     | V\$OCT1_03 | 2       | 109 | (+) | NNNRATAATNANNN         | TTACTAATCAGTA            |
| M0016 |            | 0.80078 |     |     |                        |                          |
| 2     | V\$OCT1_06 | 1       | 190 | (+) | CWNAWTKWSATRYN         | CAGTCTTGGGTTCAC          |
| M0013 |            | 0.78398 |     |     | NNNNNNNWATGCAAATNNNWNN | CAAGGTATTATGTATACATA-TAA |
| 8     | V\$OCT1_04 | 2       | 202 | (-) | W                      |                          |
| M0013 |            | 0.77910 |     |     |                        |                          |
| 6     | V\$OCT1_02 | 1       | 205 | (+) | NNGAATATKCANNNN        | GGTATTATGTATACATA        |
| M0013 |            | 0.84337 |     |     | NNNNNNNWATGCAAATNNNWNN | TATTATGTATACATA-TAACAAAA |
| 8     | V\$OCT1_04 | 1       | 207 | (+) | W                      |                          |
| M0013 |            | 0.73578 |     |     |                        |                          |
| 5     | V\$OCT1_01 | 8       | 209 | (+) | NNNNWTATGCAAATNTNNN    | TTATGTATACATATAACAA      |
| M0013 |            | 0.78168 |     |     | NNNNNNNWATGCAAATNNNWNN | TTATGTATACATA-TAACAAAATT |
| 8     | V\$OCT1_04 | 1       | 209 | (+) | W                      |                          |
| M0019 |            | 0.79039 |     |     |                        |                          |
| 5     | V\$OCT1_Q6 | 3       | 211 | (+) | NNNNATGCAAATNAN        | ATGTATACATATAAC          |
| M0013 |            |         |     |     | NNNNNNNWATGCAAATNNNWNN | GTATACATATAACAAAATTTC-TA |
| 8     | V\$OCT1_04 | 0.7821  | 213 | (+) | W                      |                          |
| M0016 |            | 0.83437 |     |     |                        |                          |
| 2     | V\$OCT1_06 | 5       | 218 | (-) | CWNAWTKWSATRYN         | CATATAACAAAATT           |
| M0016 |            | 0.85234 |     |     |                        |                          |
| 2     | V\$OCT1_06 | 4       | 220 | (-) | CWNAWTKWSATRYN         | TATAACAAAATTTC           |
| M0013 |            |         |     |     | NNNNNNNWATGCAAATNNNWNN |                          |
| 8     | V\$OCT1_04 | 0.7867  | 222 | (-) | W                      | TAACAAAATTCTATGATTTTCC   |
| M0013 |            | 0.73197 |     |     |                        |                          |
| 5     | V\$OCT1_01 | 3       | 224 | (-) | NNNNWTATGCAAATNTNNN    | ACAAAATTCTATGATTTT       |
| M0016 |            | 0.81367 |     |     |                        |                          |
| 2     | V\$OCT1_06 | 2       | 226 | (-) | CWNAWTKWSATRYN         | AAAATTTCTATGAT           |
| M0024 |            | 0.79690 |     |     |                        |                          |
| 8     | V\$OCT1_07 | 5       | 228 | (-) | TNTATGNTAATT           | AATTTCTATGAT             |
| M0016 |            | 0.80585 |     |     |                        |                          |
| 2     | V\$OCT1_06 | 9       | 229 | (+) | CWNAWTKWSATRYN         | ATTTCTATGATTTT           |
| M0016 |            | 0.82929 |     |     |                        |                          |
| 2     | V\$OCT1_06 | 7       | 252 | (-) | CWNAWTKWSATRYN         | CATCTTTCATTCTT           |
| M0013 |            | 0.78837 |     |     | NNNNNNNWATGCAAATNNNWNN |                          |
| 8     | V\$OCT1_04 | 3       | 254 | (-) | W                      | TCTTTCATTCTTCACTAATACGC  |
| M0013 |            | 0.79967 |     |     |                        |                          |
| 6     | V\$OCT1_02 | 5       | 267 | (+) | NNGAATATKCANNNN        | ACTAATACGCAGTTG          |
| M0013 |            | 0.87672 |     |     |                        |                          |
| 7     | V\$OCT1_03 | 9       | 292 | (-) | NNNRATAATNANNN         | ATGTGATTGCAAG            |
| M0016 |            | 0.82148 |     |     |                        |                          |
| 2     | V\$OCT1_06 | 4       | 295 | (-) | CWNAWTKWSATRYN         | TGATTGCAAGTATT           |
| M0016 |            | 0.81367 |     |     |                        |                          |
| 2     | V\$OCT1_06 | 2       | 309 | (+) | CWNAWTKWSATRYN         | GGTACTTTCCTATG           |
| M0013 |            | 0.80405 |     |     | NNNNNNNWATGCAAATNNNWNN |                          |
| 8     | V\$OCT1_04 | 7       | 329 | (-) | W                      | TGTTAGCTTAAAAATATATTGCG  |

|       |            |         |     |     |                        |                         |
|-------|------------|---------|-----|-----|------------------------|-------------------------|
| M0013 |            | 0.78816 |     |     | NNNNNNNWATGCAAATNNNWNN | AAAATATATTTGCAAATGTT-   |
| 8     | V\$OCT1_04 | 4       | 339 | (-) | W                      | GAT                     |
| M0013 |            | 0.83772 |     |     | NNNNNNNWATGCAAATNNNWNN | AAATATATTTGCAAATGTTGA-  |
| 8     | V\$OCT1_04 | 5       | 340 | (+) | W                      | TA                      |
| M0013 |            | 0.84261 |     |     |                        |                         |
| 5     | V\$OCT1_01 | 7       | 341 | (-) | NNNNWTATGCAAATNTNNN    | AATATATTTGCAAATGTTG     |
| M0013 |            | 0.85864 |     |     |                        |                         |
| 5     | V\$OCT1_01 | 2       | 342 | (+) | NNNNWTATGCAAATNTNNN    | ATATATTTGCAAATGTTGA     |
| M0019 |            | 0.81468 |     |     |                        |                         |
| 5     | V\$OCT1_Q6 | 3       | 344 | (+) | NNNNATGCAAATNAN        | ATATTTGCAAATGTT         |
| M0016 |            | 0.83437 |     |     |                        |                         |
| 2     | V\$OCT1_06 | 5       | 345 | (-) | CWNAWTKWSATRYN         | TATTTGCAAATGTT          |
| M0013 |            | 0.80175 |     |     | NNNNNNNWATGCAAATNNNWNN |                         |
| 8     | V\$OCT1_04 | 7       | 346 | (+) | W                      | ATTGCAAATGTTGATACTATCT  |
| M0016 |            | 0.87851 |     |     |                        |                         |
| 2     | V\$OCT1_06 | 6       | 351 | (+) | CWNAWTKWSATRYN         | CAAATGTTGATACT          |
| M0016 |            | 0.80078 |     |     |                        |                         |
| 2     | V\$OCT1_06 | 1       | 366 | (-) | CWNAWTKWSATRYN         | TCTATCTCAGAGCT          |
| M0016 |            | 0.94531 |     |     |                        |                         |
| 2     | V\$OCT1_06 | 2       | 387 | (+) | CWNAWTKWSATRYN         | AAAAATTAAATACT          |
| M0016 |            | 0.81367 |     |     |                        |                         |
| 2     | V\$OCT1_06 | 2       | 387 | (-) | CWNAWTKWSATRYN         | AAAAATTAAATACT          |
| M0016 |            | 0.88554 |     |     |                        |                         |
| 2     | V\$OCT1_06 | 7       | 388 | (-) | CWNAWTKWSATRYN         | AAAATTAAATACTT          |
| M0024 |            | 0.79330 |     |     |                        |                         |
| 8     | V\$OCT1_07 | 1       | 389 | (-) | TNTATGNTAATT           | AAATTAAATACT            |
| M0013 |            | 0.84077 |     |     |                        |                         |
| 7     | V\$OCT1_03 | 4       | 401 | (+) | NNNRTAATNANNN          | TTTATAAAGACCA           |
| M0013 |            | 0.78816 |     |     | NNNNNNNWATGCAAATNNNWNN | TAAACGAAATTCTTATA-      |
| 8     | V\$OCT1_04 | 4       | 427 | (+) | W                      | TACTGA                  |
| M0016 |            | 0.84218 |     |     |                        |                         |
| 2     | V\$OCT1_06 | 7       | 427 | (-) | CWNAWTKWSATRYN         | TAAACGAAATTCTT          |
| M0016 |            | 0.84218 |     |     |                        |                         |
| 2     | V\$OCT1_06 | 7       | 434 | (+) | CWNAWTKWSATRYN         | AATTCTTATATACT          |
| M0013 |            | 0.78021 |     |     | NNNNNNNWATGCAAATNNNWNN | TACTGAAAATGTAGATA-      |
| 8     | V\$OCT1_04 | 7       | 444 | (+) | W                      | CATAAC                  |
| M0013 |            | 0.78884 |     |     |                        |                         |
| 6     | V\$OCT1_02 | 7       | 446 | (+) | NNGAATATKCANNNN        | CTGAAAATGTAGATA         |
| M0016 |            | 0.86015 |     |     |                        |                         |
| 2     | V\$OCT1_06 | 6       | 449 | (+) | CWNAWTKWSATRYN         | AAAATGTAGATACA          |
| M0013 |            | 0.78941 |     |     | NNNNNNNWATGCAAATNNNWNN | AAATGTAGATA-            |
| 8     | V\$OCT1_04 | 9       | 450 | (+) | W                      | CATAACTTCAGT            |
| M0013 |            | 0.83375 |     |     | NNNNNNNWATGCAAATNNNWNN | ATAGATTTATGGTAAAA-      |
| 8     | V\$OCT1_04 | 2       | 473 | (+) | W                      | TAATTT                  |
| M0013 |            | 0.79435 |     |     |                        |                         |
| 5     | V\$OCT1_01 | 3       | 475 | (+) | NNNNWTATGCAAATNTNNN    | AGATTTATGGTAAAAATAAT    |
| M0024 |            | 0.79520 |     |     |                        |                         |
| 8     | V\$OCT1_07 | 9       | 478 | (+) | TNTATGNTAATT           | TTTATGGTAAAA            |
| M0013 |            | 0.85654 |     |     | NNNNNNNWATGCAAATNNNWNN |                         |
| 8     | V\$OCT1_04 | 5       | 485 | (-) | W                      | TAAAATAATTTGAATCATTTTTG |
| M0013 |            | 0.73616 |     |     |                        |                         |
| 5     | V\$OCT1_01 | 9       | 487 | (-) | NNNNWTATGCAAATNTNNN    | AAATAATTTGAATCATTTT     |
| M0016 |            | 0.84726 |     |     |                        |                         |
| 2     | V\$OCT1_06 | 6       | 488 | (+) | CWNAWTKWSATRYN         | AATAATTTGAATCA          |
| M0019 |            | 0.82287 |     |     |                        |                         |
| 5     | V\$OCT1_Q6 | 1       | 489 | (-) | NNNNATGCAAATNAN        | ATAATTTGAATCATT         |
| M0024 |            | 0.79796 |     |     |                        |                         |
| 8     | V\$OCT1_07 | 5       | 491 | (-) | TNTATGNTAATT           | AATTTGAATCAT            |
| M0016 |            | 0.82617 |     |     |                        |                         |
| 2     | V\$OCT1_06 | 2       | 501 | (+) | CWNAWTKWSATRYN         | ATTTTTGTCAAATT          |
| M0013 |            | 0.84670 |     |     |                        |                         |
| 7     | V\$OCT1_03 | 1       | 514 | (+) | NNNRTAATNANNN          | TCTGTAAAAAGTT           |
| M0016 |            | 0.86796 |     |     |                        |                         |
| 2     | V\$OCT1_06 | 9       | 521 | (+) | CWNAWTKWSATRYN         | AAAGTTGTCATACA          |
| M0013 |            | 0.79046 |     |     | NNNNNNNWATGCAAATNNNWNN | AAGTTGTCATACAGAATAATT-  |
| 8     | V\$OCT1_04 | 4       | 522 | (+) | W                      | TA                      |

|       |            |         |     |     |                        |                          |
|-------|------------|---------|-----|-----|------------------------|--------------------------|
| M0013 |            | 0.82664 |     |     | NNNNNNNWATGCAAATNNNWNN |                          |
| 8     | V\$OCT1_04 | 2       | 532 | (+) | W                      | ACAGAATAATTTATAATATTTTT  |
| M0013 |            | 0.82977 |     |     | NNNNNNNWATGCAAATNNNWNN |                          |
| 8     | V\$OCT1_04 | 8       | 534 | (-) | W                      | AGAATAATTTATAATATTTTTTGT |
| M0013 |            | 0.85499 |     |     |                        |                          |
| 7     | V\$OCT1_03 | 8       | 541 | (+) | NNNRTAATNANNN          | TTTATAATATTTT            |
| M0013 |            | 0.78544 |     |     | NNNNNNNWATGCAAATNNNWNN |                          |
| 8     | V\$OCT1_04 | 5       | 542 | (-) | W                      | TTATAATATTTTTGTTTTCATAG  |
| M0013 |            | 0.83939 |     |     | NNNNNNNWATGCAAATNNNWNN |                          |
| 8     | V\$OCT1_04 | 8       | 548 | (-) | W                      | TATTTTTGTTTTCATAGAAATAA  |
| M0013 |            | 0.78272 |     |     | NNNNNNNWATGCAAATNNNWNN |                          |
| 8     | V\$OCT1_04 | 7       | 553 | (+) | W                      | TTGTTTTCATAGAAATAACATTT  |
| M0013 |            | 0.81012 |     |     | NNNNNNNWATGCAAATNNNWNN |                          |
| 8     | V\$OCT1_04 | 1       | 554 | (-) | W                      | TGTTTTCATAGAAATAACATTTTC |
| M0016 |            | 0.84257 |     |     |                        |                          |
| 2     | V\$OCT1_06 | 8       | 563 | (+) | CWNAWTKWSATRYN         | AGAAATAACATTTTC          |
| M0016 |            | 0.83476 |     |     |                        |                          |
| 2     | V\$OCT1_06 | 6       | 564 | (-) | CWNAWTKWSATRYN         | GAAATAACATTTCT           |
| M0024 |            | 0.80326 |     |     |                        |                          |
| 8     | V\$OCT1_07 | 5       | 565 | (-) | TNTATGNTAATT           | AAATAACATTTTC            |
| M0016 |            | 0.83437 |     |     |                        |                          |
| 2     | V\$OCT1_06 | 5       | 569 | (-) | CWNAWTKWSATRYN         | AACATTTCTGGTAG           |
| M0013 |            | 0.81429 |     |     |                        |                          |
| 6     | V\$OCT1_02 | 3       | 577 | (-) | NNGAATATKCANNNN        | TGGTAGAATATTTCA          |
| M0016 |            | 0.87773 |     |     |                        |                          |
| 2     | V\$OCT1_06 | 4       | 583 | (-) | CWNAWTKWSATRYN         | AATATTTCAAGGCC           |
| M0013 |            | 0.79924 |     |     | NNNNNNNWATGCAAATNNNWNN |                          |
| 8     | V\$OCT1_04 | 7       | 597 | (-) | W                      | ATTTTTATTTTGTAATTAGGT    |
| M0013 |            | 0.94587 |     |     |                        |                          |
| 7     | V\$OCT1_03 | 1       | 607 | (+) | NNNRTAATNANNN          | TGTGTAATTAGGT            |
| M0013 |            | 0.85110 |     |     | NNNNNNNWATGCAAATNNNWNN |                          |
| 8     | V\$OCT1_04 | 8       | 608 | (+) | W                      | GTGTAATTAGGTAAATAAAAT-TA |
| M0013 |            | 0.73655 |     |     |                        |                          |
| 5     | V\$OCT1_01 | 1       | 610 | (+) | NNNNWTATGCAAATNTNNN    | GTAATTAGGTAAATAAAAT      |
| M0016 |            | 0.82656 |     |     |                        |                          |
| 2     | V\$OCT1_06 | 2       | 622 | (+) | CWNAWTKWSATRYN         | ATAAAATTAATTTT           |
| M0016 |            | 0.82656 |     |     |                        |                          |
| 2     | V\$OCT1_06 | 2       | 624 | (-) | CWNAWTKWSATRYN         | AAAATTAATTTTAT           |
| M0016 |            | 0.84218 |     |     |                        |                          |
| 2     | V\$OCT1_06 | 7       | 636 | (+) | CWNAWTKWSATRYN         | ATAAAGGAAATGTC           |
| M0019 |            | 0.84224 |     |     |                        |                          |
| 5     | V\$OCT1_Q6 | 9       | 641 | (+) | NNNNATGCAAATNAN        | GGAAATGTCAATGAT          |
| M0016 |            | 0.91171 |     |     |                        |                          |
| 2     | V\$OCT1_06 | 9       | 642 | (-) | CWNAWTKWSATRYN         | GAAATGTCAATGAT           |
| M0013 |            | 0.86092 |     |     |                        |                          |
| 7     | V\$OCT1_03 | 5       | 655 | (+) | NNNRTAATNANNN          | TAGACAATTAGAT            |
| M0016 |            | 0.94531 |     |     |                        |                          |
| 2     | V\$OCT1_06 | 2       | 657 | (+) | CWNAWTKWSATRYN         | GACAATTAGATATA           |
| M0013 |            | 0.78335 |     |     | NNNNNNNWATGCAAATNNNWNN |                          |
| 8     | V\$OCT1_04 | 4       | 658 | (+) | W                      | ACAATTAGATATAAATGAC-TACT |
| M0013 |            | 0.80196 |     |     | NNNNNNNWATGCAAATNNNWNN |                          |
| 8     | V\$OCT1_04 | 6       | 659 | (-) | W                      | CAATTAGATATAAATGAC-TACTT |
| M0019 |            | 0.79694 |     |     |                        |                          |
| 5     | V\$OCT1_Q6 | 3       | 662 | (+) | NNNNATGCAAATNAN        | TTAGATATAAATGAC          |
| M0013 |            | 0.78168 |     |     | NNNNNNNWATGCAAATNNNWNN |                          |
| 8     | V\$OCT1_04 | 1       | 677 | (-) | W                      | TACTTTTATAAAGATGATTAAAT  |
| M0013 |            | 0.89371 |     |     |                        |                          |
| 7     | V\$OCT1_03 | 8       | 681 | (+) | NNNRTAATNANNN          | TTTATAAAGATGA            |
| M0013 |            | 0.81911 |     |     | NNNNNNNWATGCAAATNNNWNN |                          |
| 8     | V\$OCT1_04 | 3       | 682 | (+) | W                      | TTATAAAGATGATTAAATTT-GGA |
| M0016 |            | 0.83710 |     |     |                        |                          |
| 2     | V\$OCT1_06 | 9       | 689 | (+) | CWNAWTKWSATRYN         | GATGATTAAATTTG           |
| M0013 |            | 0.89376 |     |     | NNNNNNNWATGCAAATNNNWNN |                          |
| 8     | V\$OCT1_04 | 8       | 691 | (-) | W                      | TGATTAAATTTGGATATTTGTAA  |
| M0013 |            | 0.87676 |     |     |                        |                          |
| 5     | V\$OCT1_01 | 5       | 693 | (-) | NNNNWTATGCAAATNTNNN    | ATTAAATTTGGATATTTGT      |

|       |            |         |     |     |                        |                         |
|-------|------------|---------|-----|-----|------------------------|-------------------------|
| M0013 |            | 0.74017 |     |     |                        |                         |
| 5     | V\$OCT1_01 | 6       | 694 | (+) | NNNNWTATGCAAATNTNNN    | TTAAATTTGGATATTTGTA     |
| M0016 |            | 0.87343 |     |     |                        |                         |
| 2     | V\$OCT1_06 | 7       | 695 | (+) | CWNAWTKWSATRYN         | TAAATTTGGATATT          |
| M0019 |            | 0.79121 |     |     |                        |                         |
| 5     | V\$OCT1_Q6 | 2       | 695 | (-) | NNNNATGCAAATNAN        | TAAATTTGGATATT          |
| M0013 |            | 0.83513 |     |     |                        |                         |
| 6     | V\$OCT1_02 | 8       | 697 | (-) | NNGAATATKCANNNN        | AATTTGGATATTTGT         |
| M0024 |            | 0.85499 |     |     |                        |                         |
| 8     | V\$OCT1_07 | 3       | 697 | (-) | TNTATGNTAATT           | AATTTGGATATT            |
| M0013 |            | 0.83751 |     |     | NNNNNNNWATGCAAATNNNWNN | TTGTAAGGATA-            |
| 8     | V\$OCT1_04 | 6       | 708 | (+) | W                      | CAAATATATGAA            |
| M0013 |            | 0.75887 |     |     |                        |                         |
| 5     | V\$OCT1_01 | 1       | 710 | (+) | NNNNWTATGCAAATNTNNN    | GTAAGGATACAAATATATG     |
| M0013 |            | 0.73616 |     |     |                        |                         |
| 5     | V\$OCT1_01 | 9       | 720 | (+) | NNNNWTATGCAAATNTNNN    | AAATATATGAAACAGTAG      |
| M0016 |            | 0.81210 |     |     |                        |                         |
| 2     | V\$OCT1_06 | 9       | 749 | (-) | CWNAWTKWSATRYN         | GGCCTATAAATATG          |
| M0013 |            | 0.85539 |     |     |                        |                         |
| 7     | V\$OCT1_03 | 3       | 751 | (+) | NNNRTAATNANNN          | CCTATAAATATGT           |
| M0013 |            | 0.80740 |     |     | NNNNNNNWATGCAAATNNNWNN |                         |
| 8     | V\$OCT1_04 | 3       | 751 | (-) | W                      | CCTATAAATATGCTTTTTTAAC  |
| M0013 |            | 0.78343 |     |     |                        |                         |
| 6     | V\$OCT1_02 | 3       | 754 | (+) | NNGAATATKCANNNN        | ATAAATATGCTTTT          |
| M0016 |            | 0.82890 |     |     |                        |                         |
| 2     | V\$OCT1_06 | 6       | 756 | (+) | CWNAWTKWSATRYN         | AAATATGTCTTTTT          |
| M0016 |            | 0.87578 |     |     |                        |                         |
| 2     | V\$OCT1_06 | 1       | 757 | (-) | CWNAWTKWSATRYN         | AATATGTCTTTTTT          |
| M0016 |            | 0.85507 |     |     |                        |                         |
| 2     | V\$OCT1_06 | 8       | 814 | (-) | CWNAWTKWSATRYN         | TATATAAAATAATC          |
| M0013 |            |         |     |     | NNNNNNNWATGCAAATNNNWNN | GCTGACTAAGGTATAAACAAAT  |
| 8     | V\$OCT1_04 | 0.78189 | 840 | (+) | W                      | T                       |
| M0013 |            | 0.78105 |     |     | NNNNNNNWATGCAAATNNNWNN | TAAGGTATAAACAAATTCATG   |
| 8     | V\$OCT1_04 | 4       | 846 | (+) | W                      | T                       |
| M0013 |            | 0.79168 |     |     |                        |                         |
| 5     | V\$OCT1_01 | 3       | 848 | (+) | NNNNWTATGCAAATNTNNN    | AGGTATAAACAAATTCAT      |
| M0013 |            | 0.85618 |     |     |                        |                         |
| 7     | V\$OCT1_03 | 3       | 849 | (+) | NNNRTAATNANNN          | GGTATAAACAAAT           |
| M0016 |            | 0.88906 |     |     |                        |                         |
| 2     | V\$OCT1_06 | 2       | 856 | (+) | CWNAWTKWSATRYN         | ACAAATTCATGTA           |
| M0013 |            | 0.80782 |     |     | NNNNNNNWATGCAAATNNNWNN |                         |
| 8     | V\$OCT1_04 | 1       | 857 | (+) | W                      | CAAATTCATGTATAATCTAATT  |
| M0016 |            | 0.88554 |     |     |                        |                         |
| 2     | V\$OCT1_06 | 7       | 857 | (-) | CWNAWTKWSATRYN         | CAAATTCATGTAT           |
| M0013 |            | 0.78884 |     |     |                        |                         |
| 6     | V\$OCT1_02 | 7       | 862 | (-) | NNGAATATKCANNNN        | TTCATGTATAATCTA         |
| M0013 |            | 0.78293 |     |     | NNNNNNNWATGCAAATNNNWNN |                         |
| 8     | V\$OCT1_04 | 6       | 863 | (+) | W                      | TCATGTATAATCTAATTTTTCTT |
| M0013 |            | 0.75333 |     |     |                        |                         |
| 5     | V\$OCT1_01 | 8       | 865 | (+) | NNNNWTATGCAAATNTNNN    | ATGTATAATCTAATTTTC      |
| M0013 |            | 0.85578 |     |     |                        |                         |
| 7     | V\$OCT1_03 | 8       | 866 | (+) | NNNRTAATNANNN          | TGTATAATCTAAT           |
| M0024 |            | 0.83845 |     |     |                        |                         |
| 8     | V\$OCT1_07 | 7       | 868 | (+) | TNTATGNTAATT           | TATAATCTAATT            |
| M0016 |            | 0.86835 |     |     |                        |                         |
| 2     | V\$OCT1_06 | 9       | 869 | (-) | CWNAWTKWSATRYN         | ATAATCTAATTTT           |
| M0013 |            | 0.74093 |     |     |                        |                         |
| 5     | V\$OCT1_01 | 9       | 873 | (-) | NNNNWTATGCAAATNTNNN    | TCTAATTTTCTTATGTAT      |
| M0016 |            | 0.80820 |     |     |                        |                         |
| 2     | V\$OCT1_06 | 3       | 888 | (+) | CWNAWTKWSATRYN         | GTATCTGAAACGCA          |
| M0016 |            | 0.86835 |     |     |                        |                         |
| 2     | V\$OCT1_06 | 9       | 911 | (+) | CWNAWTKWSATRYN         | CACATATAAATGTA          |
| M0016 |            | 0.80703 |     |     |                        |                         |
| 2     | V\$OCT1_06 | 1       | 911 | (-) | CWNAWTKWSATRYN         | CACATATAAATGTA          |
| M0013 |            | 0.79255 |     |     | NNNNNNNWATGCAAATNNNWNN |                         |
| 8     | V\$OCT1_04 | 5       | 912 | (+) | W                      | ACATATAAATGTATGTATTTTTG |



|       |            |         |      |     |                       |                         |
|-------|------------|---------|------|-----|-----------------------|-------------------------|
| M0016 |            | 0.84218 |      |     |                       |                         |
| 2     | V\$OCT1_06 | 7       | 917  | (-) | CWNAWTKWSATRYN        | TAAATGTATGTATT          |
| M0016 |            | 0.90195 |      |     |                       |                         |
| 2     | V\$OCT1_06 | 3       | 921  | (-) | CWNAWTKWSATRYN        | TGTATGTATTTTTG          |
| M0016 |            | 0.80078 |      |     |                       |                         |
| 2     | V\$OCT1_06 | 1       | 935  | (+) | CWNAWTKWSATRYN        | GGTCTTGCAATTTA          |
| M0016 |            | 0.80820 |      |     |                       |                         |
| 2     | V\$OCT1_06 | 3       | 975  | (+) | CWNAWTKWSATRYN        | ATGTTTGACTTATG          |
| M0013 |            | 0.81116 |      |     | NNNNNNNWATGCAAATNNNWN |                         |
| 8     | V\$OCT1_04 | 7       | 984  | (+) | W                     | TTATGATTCTGTTTAATCATCTT |
| M0013 |            | 0.78147 |      |     | NNNNNNNWATGCAAATNNNWN |                         |
| 8     | V\$OCT1_04 | 2       | 989  | (-) | W                     | ATTCTGTTAATCATCTTCATTC  |
| M0013 |            | 0.77070 |      |     |                       |                         |
| 6     | V\$OCT1_02 | 9       | 998  | (+) | NNGAATATKCANNNN       | AATCATCTTCATTCA         |
| M0016 |            | 0.82656 |      |     |                       |                         |
| 2     | V\$OCT1_06 | 2       | 999  | (+) | CWNAWTKWSATRYN        | ATCATCTTCATTCA          |
| M0016 |            | 0.84218 |      |     |                       |                         |
| 2     | V\$OCT1_06 | 7       | 1007 | (+) | CWNAWTKWSATRYN        | CATTCAAGTCATGTC         |
| M0016 |            | 0.84218 |      |     |                       |                         |
| 2     | V\$OCT1_06 | 7       | 1012 | (+) | CWNAWTKWSATRYN        | AGTCATGTCATGGA          |
| M0016 |            | 0.83710 |      |     |                       |                         |
| 2     | V\$OCT1_06 | 9       | 1013 | (-) | CWNAWTKWSATRYN        | GTCATGTCATGGAT          |
| M0016 |            | 0.80429 |      |     |                       |                         |
| 2     | V\$OCT1_06 | 7       | 1039 | (+) | CWNAWTKWSATRYN        | CAAAATTAAGTAAT          |
| M0016 |            | 0.80078 |      |     |                       |                         |
| 2     | V\$OCT1_06 | 1       | 1039 | (-) | CWNAWTKWSATRYN        | CAAAATTAAGTAAT          |
| M0016 |            | 0.86835 |      |     |                       |                         |
| 2     | V\$OCT1_06 | 9       | 1067 | (+) | CWNAWTKWSATRYN        | AAAAATTTAATGAA          |
| M0013 |            | 0.80259 |      |     | NNNNNNNWATGCAAATNNNWN | AAAATTTAATGAAGGTAA-     |
| 8     | V\$OCT1_04 | 3       | 1068 | (+) | W                     | TAGT                    |
| M0016 |            | 0.92460 |      |     |                       |                         |
| 2     | V\$OCT1_06 | 9       | 1068 | (-) | CWNAWTKWSATRYN        | AAAATTTAATGAAG          |
| M0013 |            | 0.73903 |      |     |                       |                         |
| 5     | V\$OCT1_01 | 1       | 1086 | (-) | NNNNWTATGCAAATNTNNN   | ATAGTTTCTACATAATGCA     |
| M0016 |            | 0.83437 |      |     |                       |                         |
| 2     | V\$OCT1_06 | 5       | 1107 | (+) | CWNAWTKWSATRYN        | ATGTTTTTCATGAA          |
| M0016 |            | 0.84726 |      |     |                       |                         |
| 2     | V\$OCT1_06 | 6       | 1108 | (-) | CWNAWTKWSATRYN        | TGTTTTTCATGAAG          |
| M0013 |            | 0.87356 |      |     |                       |                         |
| 7     | V\$OCT1_03 | 8       | 1142 | (+) | NNNRATAATNANNN        | AGGATAAAGACAT           |
| M0016 |            | 0.86289 |      |     |                       |                         |
| 2     | V\$OCT1_06 | 1       | 1144 | (+) | CWNAWTKWSATRYN        | GATAAAGACATTTT          |
| M0016 |            | 0.80039 |      |     |                       |                         |
| 2     | V\$OCT1_06 | 1       | 1152 | (-) | CWNAWTKWSATRYN        | CATTTTAAAAAATT          |
| M0013 |            | 0.84037 |      |     |                       |                         |
| 7     | V\$OCT1_03 | 9       | 1158 | (-) | NNNRATAATNANNN        | AAAAAATTACAGA           |
| M0013 |            |         |      |     | NNNNNNNWATGCAAATNNNWN | AAAAAATTACAGA-          |
| 8     | V\$OCT1_04 | 0.81054 | 1158 | (+) | W                     | TATTAAATGT              |
| M0016 |            | 0.87578 |      |     |                       |                         |
| 2     | V\$OCT1_06 | 1       | 1159 | (+) | CWNAWTKWSATRYN        | AAAAATTACAGATA          |
| M0016 |            | 0.86992 |      |     |                       |                         |
| 2     | V\$OCT1_06 | 2       | 1160 | (-) | CWNAWTKWSATRYN        | AAAATTACAGATAT          |
| M0016 |            |         |      |     |                       |                         |
| 2     | V\$OCT1_06 | 0.90625 | 1168 | (+) | CWNAWTKWSATRYN        | AGATATTAAATGTA          |
| M0016 |            | 0.83437 |      |     |                       |                         |
| 2     | V\$OCT1_06 | 5       | 1169 | (-) | CWNAWTKWSATRYN        | GATATTAAATGTAA          |
| M0016 |            | 0.86054 |      |     |                       |                         |
| 2     | V\$OCT1_06 | 7       | 1173 | (+) | CWNAWTKWSATRYN        | TTAAATGTAATTTA          |
| M0019 |            | 0.83133 |      |     |                       |                         |
| 5     | V\$OCT1_Q6 | 2       | 1173 | (+) | NNNNATGCAAATNAN       | TTAAATGTAATTTAC         |
| M0016 |            | 0.94531 |      |     |                       |                         |
| 2     | V\$OCT1_06 | 2       | 1174 | (-) | CWNAWTKWSATRYN        | TAAATGTAATTTAC          |
| M0024 |            | 0.81238 |      |     |                       |                         |
| 8     | V\$OCT1_07 | 1       | 1174 | (+) | TNTATGNTAATT          | TAAATGTAATTT            |
| M0013 |            | 0.80447 |      |     | NNNNNNNWATGCAAATNNNWN |                         |
| 8     | V\$OCT1_04 | 5       | 1195 | (-) | W                     | TTTAGTTTATCAATTTTAACAA  |

|       |            |         |      |     |                        |                         |
|-------|------------|---------|------|-----|------------------------|-------------------------|
| M0013 |            | 0.78063 |      |     | NNNNNNNWATGCAAATNNNWNN |                         |
| 8     | V\$OCT1_04 | 6       | 1200 | (+) | W                      | GTTTATCAATTTTAACAAATCCA |
| M0013 |            | 0.80071 |      |     | NNNNNNNWATGCAAATNNNWNN |                         |
| 8     | V\$OCT1_04 | 1       | 1201 | (-) | W                      | TTTATCAATTTTAACAAATCCAA |
| M0016 |            | 0.88554 |      |     |                        |                         |
| 2     | V\$OCT1_06 | 7       | 1215 | (-) | CWNAWTKWSATRYN         | CAAATCCAATGATC          |
| M0016 |            | 0.83437 |      |     |                        |                         |
| 2     | V\$OCT1_06 | 5       | 1234 | (+) | CWNAWTKWSATRYN         | GGAAATTTCTTTTT          |
| M0013 |            | 0.79694 |      |     | NNNNNNNWATGCAAATNNNWNN |                         |
| 8     | V\$OCT1_04 | 7       | 1236 | (-) | W                      | AAATTTCTTTTAAATTTTTTTTG |
| M0016 |            | 0.81367 |      |     |                        |                         |
| 2     | V\$OCT1_06 | 2       | 1240 | (+) | CWNAWTKWSATRYN         | TTCTTTTAAATTT           |
| M0013 |            | 0.81095 |      |     | NNNNNNNWATGCAAATNNNWNN |                         |
| 8     | V\$OCT1_04 | 8       | 1247 | (-) | W                      | TAATTTTTTTTGTAGTATTTTAA |
| M0013 |            | 0.78502 |      |     | NNNNNNNWATGCAAATNNNWNN |                         |
| 8     | V\$OCT1_04 | 7       | 1255 | (+) | W                      | TTTGTAGTATTTTAAAATTTGTA |
| M0013 |            | 0.80217 |      |     | NNNNNNNWATGCAAATNNNWNN |                         |
| 8     | V\$OCT1_04 | 5       | 1256 | (-) | W                      | TTGTAGTATTTTAAAATTTGTAA |
| M0016 |            |         |      |     |                        |                         |
| 2     | V\$OCT1_06 | 0.81875 | 1260 | (+) | CWNAWTKWSATRYN         | AGTATTTTAAAATT          |
| M0016 |            | 0.83437 |      |     |                        |                         |
| 2     | V\$OCT1_06 | 5       | 1260 | (-) | CWNAWTKWSATRYN         | AGTATTTTAAAATT          |
| M0016 |            | 0.80039 |      |     |                        |                         |
| 2     | V\$OCT1_06 | 1       | 1261 | (+) | CWNAWTKWSATRYN         | GTATTTTAAAATTT          |
| M0016 |            | 0.86562 |      |     |                        |                         |
| 2     | V\$OCT1_06 | 5       | 1262 | (-) | CWNAWTKWSATRYN         | TATTTTAAAATTG           |
| M0013 |            | 0.80761 |      |     | NNNNNNNWATGCAAATNNNWNN |                         |
| 8     | V\$OCT1_04 | 2       | 1264 | (-) | W                      | TTTTAAAATTTGTAATATTTAAA |
| M0013 |            | 0.81681 |      |     | NNNNNNNWATGCAAATNNNWNN |                         |
| 8     | V\$OCT1_04 | 3       | 1265 | (-) | W                      | TTTAAAATTTGTAATATTTAAAT |
| M0016 |            | 0.90351 |      |     |                        |                         |
| 2     | V\$OCT1_06 | 6       | 1269 | (+) | CWNAWTKWSATRYN         | AAATTTGTAATATT          |
| M0013 |            |         |      |     | NNNNNNNWATGCAAATNNNWNN |                         |
| 8     | V\$OCT1_04 | 0.7821  | 1270 | (+) | W                      | AATTTGTAATATTTAAATATTGA |
| M0016 |            | 0.84960 |      |     |                        |                         |
| 2     | V\$OCT1_06 | 9       | 1270 | (-) | CWNAWTKWSATRYN         | AATTTGTAATATTT          |
| M0013 |            | 0.85578 |      |     |                        |                         |
| 7     | V\$OCT1_03 | 8       | 1272 | (+) | NNNRTAATNANNN          | TTTGTAATATTTA           |
| M0013 |            | 0.81367 |      |     | NNNNNNNWATGCAAATNNNWNN |                         |
| 8     | V\$OCT1_04 | 6       | 1272 | (+) | W                      | TTTGTAATATTTAAATATTGATG |
| M0013 |            | 0.86511 |      |     | NNNNNNNWATGCAAATNNNWNN |                         |
| 8     | V\$OCT1_04 | 9       | 1273 | (-) | W                      | TTGTAATATTTAAATATTGATGC |
| M0013 |            | 0.80427 |      |     |                        |                         |
| 5     | V\$OCT1_01 | 3       | 1274 | (+) | NNNNWTATGCAAATNTNNN    | TGTAATATTTAAATATTGA     |
| M0013 |            | 0.81700 |      |     |                        |                         |
| 6     | V\$OCT1_02 | 1       | 1274 | (+) | NNGAATATKCANNNN        | TGTAATATTTAAATA         |
| M0013 |            | 0.82067 |      |     |                        |                         |
| 5     | V\$OCT1_01 | 9       | 1275 | (-) | NNNNWTATGCAAATNTNNN    | GTAATATTTAAATATTGAT     |
| M0016 |            |         |      |     |                        |                         |
| 2     | V\$OCT1_06 | 0.9375  | 1277 | (+) | CWNAWTKWSATRYN         | AATATTTAAATATT          |
| M0016 |            |         |      |     |                        |                         |
| 2     | V\$OCT1_06 | 0.9375  | 1277 | (-) | CWNAWTKWSATRYN         | AATATTTAAATATT          |
| M0013 |            | 0.85760 |      |     |                        |                         |
| 6     | V\$OCT1_02 | 7       | 1279 | (-) | NNGAATATKCANNNN        | TATTTAAATATTGAT         |
| M0013 |            |         |      |     | NNNNNNNWATGCAAATNNNWNN |                         |
| 8     | V\$OCT1_04 | 0.7867  | 1279 | (-) | W                      | TATTTAAATATTGATGCTTCTCT |
| M0013 |            | 0.77206 |      |     |                        |                         |
| 6     | V\$OCT1_02 | 3       | 1282 | (+) | NNGAATATKCANNNN        | TTAAATATTGATGCT         |
| M0016 |            | 0.80390 |      |     |                        |                         |
| 2     | V\$OCT1_06 | 6       | 1283 | (+) | CWNAWTKWSATRYN         | TAAATATTGATGCT          |
| M0016 |            | 0.80703 |      |     |                        |                         |
| 2     | V\$OCT1_06 | 1       | 1332 | (+) | CWNAWTKWSATRYN         | CAGGATCAAATGCT          |
| M0016 |            | 0.84218 |      |     |                        |                         |
| 2     | V\$OCT1_06 | 7       | 1333 | (-) | CWNAWTKWSATRYN         | AGGATCAAATGCTT          |
| M0016 |            | 0.83476 |      |     |                        |                         |
| 2     | V\$OCT1_06 | 6       | 1365 | (+) | CWNAWTKWSATRYN         | GATATTGGTATTTC          |

|       |            |         |      |     |                        |                          |
|-------|------------|---------|------|-----|------------------------|--------------------------|
| M0013 |            | 0.73597 |      |     |                        |                          |
| 5     | V\$OCT1_01 | 9       | 1391 | (+) | NNNNWTATGCAAATNTNNN    | AGCACTAAGCAAAATAATT      |
| M0013 |            |         |      |     | NNNNNNNWATGCAAATNNNWNN | CAAAATAATTTGAATGGTAAA-   |
| 8     | V\$OCT1_04 | 0.83187 | 1400 | (-) | W                      | TA                       |
| M0016 |            | 0.83984 |      |     |                        |                          |
| 2     | V\$OCT1_06 | 4       | 1404 | (+) | CWNAWTKWSATRYN         | ATAATTTGAATGGT           |
| M0019 |            |         |      |     |                        |                          |
| 5     | V\$OCT1_Q6 | 0.81905 | 1404 | (-) | NNNNATGCAAATNAN        | ATAATTTGAATGGTA          |
| M0013 |            | 0.80656 |      |     | NNNNNNNWATGCAAATNNNWNN |                          |
| 8     | V\$OCT1_04 | 6       | 1405 | (+) | W                      | TAATTTGAATGGTAAATATTTAT  |
| M0024 |            | 0.84396 |      |     |                        |                          |
| 8     | V\$OCT1_07 | 9       | 1406 | (-) | TNTATGNTAATT           | AATTTGAATGGT             |
| M0024 |            | 0.84396 |      |     |                        |                          |
| 8     | V\$OCT1_07 | 9       | 1410 | (+) | TNTATGNTAATT           | TGAATGGTAAAT             |
| M0013 |            | 0.81591 |      |     |                        |                          |
| 6     | V\$OCT1_02 | 8       | 1413 | (-) | NNGAATATKCANNNN        | ATGGTAAATATTTAT          |
| M0013 |            | 0.86092 |      |     |                        |                          |
| 7     | V\$OCT1_03 | 5       | 1413 | (+) | NNNRATATNANNN          | ATGGTAAATATTT            |
| M0013 |            |         |      |     | NNNNNNNWATGCAAATNNNWNN | TGGTAAATATTTATATTGAA-    |
| 8     | V\$OCT1_04 | 0.80343 | 1414 | (+) | W                      | GAG                      |
| M0013 |            | 0.82647 |      |     |                        |                          |
| 6     | V\$OCT1_02 | 5       | 1416 | (+) | NNGAATATKCANNNN        | GTAAATATTTATATT          |
| M0016 |            |         |      |     |                        |                          |
| 2     | V\$OCT1_06 | 0.88125 | 1437 | (+) | CWNAWTKWSATRYN         | CAAAATTAAAAACT           |
| M0016 |            | 0.82148 |      |     |                        |                          |
| 2     | V\$OCT1_06 | 4       | 1438 | (-) | CWNAWTKWSATRYN         | AAAATTAAAAACTA           |
| M0013 |            | 0.80405 |      |     | NNNNNNNWATGCAAATNNNWNN | AAAATTAATGAATAAAAAA-     |
| 8     | V\$OCT1_04 | 7       | 1445 | (+) | W                      | TATT                     |
| M0016 |            | 0.80039 |      |     |                        |                          |
| 2     | V\$OCT1_06 | 1       | 1445 | (-) | CWNAWTKWSATRYN         | AAAATTAATGAAT            |
| M0013 |            | 0.79276 |      |     | NNNNNNNWATGCAAATNNNWNN | CTAAATGAATAAAAAA-        |
| 8     | V\$OCT1_04 | 5       | 1449 | (+) | W                      | TATTACTT                 |
| M0013 |            | 0.82891 |      |     |                        |                          |
| 6     | V\$OCT1_02 | 2       | 1450 | (-) | NNGAATATKCANNNN        | TAAATGAATAAAAAAT         |
| M0013 |            | 0.83061 |      |     | NNNNNNNWATGCAAATNNNWNN | TAAATGAATAAAAAA-         |
| 8     | V\$OCT1_04 | 5       | 1450 | (-) | W                      | TATTACTT                 |
| M0013 |            | 0.85736 |      |     |                        |                          |
| 7     | V\$OCT1_03 | 9       | 1454 | (+) | NNNRATATNANNN          | TGAATAAAAAATAT           |
| M0016 |            | 0.86054 |      |     |                        |                          |
| 2     | V\$OCT1_06 | 7       | 1454 | (-) | CWNAWTKWSATRYN         | TGAATAAAAAATATT          |
| M0013 |            | 0.78397 |      |     |                        |                          |
| 6     | V\$OCT1_02 | 4       | 1456 | (-) | NNGAATATKCANNNN        | AATAAAAAATATTACT         |
| M0024 |            | 0.81238 |      |     |                        |                          |
| 8     | V\$OCT1_07 | 1       | 1456 | (-) | TNTATGNTAATT           | AATAAAAAATATT            |
| M0016 |            | 0.83671 |      |     |                        |                          |
| 2     | V\$OCT1_06 | 9       | 1461 | (+) | CWNAWTKWSATRYN         | AAATATTACTTTCA           |
| M0016 |            | 0.83437 |      |     |                        |                          |
| 2     | V\$OCT1_06 | 5       | 1465 | (+) | CWNAWTKWSATRYN         | ATTACTTTCAAGTG           |
| M0013 |            | 0.73674 |      |     |                        |                          |
| 5     | V\$OCT1_01 | 2       | 1482 | (-) | NNNNWTATGCAAATNTNNN    | CAACTTTTATCATAATATA      |
| M0013 |            | 0.78565 |      |     | NNNNNNNWATGCAAATNNNWNN |                          |
| 8     | V\$OCT1_04 | 5       | 1511 | (-) | W                      | GGAAAAATTAAGAATTTTTTTTTT |
| M0016 |            | 0.80039 |      |     |                        |                          |
| 2     | V\$OCT1_06 | 1       | 1514 | (-) | CWNAWTKWSATRYN         | AAAATTAAGAATTT           |
| M0013 |            | 0.78126 |      |     |                        |                          |
| 6     | V\$OCT1_02 | 7       | 1517 | (-) | NNGAATATKCANNNN        | ATTAAGAATTTTTTTT         |
| M0013 |            | 0.80133 |      |     | NNNNNNNWATGCAAATNNNWNN |                          |
| 8     | V\$OCT1_04 | 8       | 1522 | (-) | W                      | GAATTTTTTTTTTCATGAATCAAA |
| M0016 |            | 0.83476 |      |     |                        |                          |
| 2     | V\$OCT1_06 | 6       | 1535 | (+) | CWNAWTKWSATRYN         | ATGAATCAAATTTT           |
| M0016 |            |         |      |     |                        |                          |
| 2     | V\$OCT1_06 | 0.88125 | 1536 | (-) | CWNAWTKWSATRYN         | TGAATCAAATTTTA           |
| M0016 |            | 0.86562 |      |     |                        |                          |
| 2     | V\$OCT1_06 | 5       | 1541 | (+) | CWNAWTKWSATRYN         | CAAATTTTATTATA           |
| M0013 |            | 0.90833 |      |     |                        |                          |
| 7     | V\$OCT1_03 | 7       | 1544 | (-) | NNNRATATNANNN          | ATTTTATTATAAG            |

|       |            |         |      |     |                        |                          |
|-------|------------|---------|------|-----|------------------------|--------------------------|
| M0016 |            | 0.82929 |      |     |                        |                          |
| 2     | V\$OCT1_06 | 7       | 1561 | (+) | CWNAWTKWSATRYN         | AACTATTTTATTTT           |
| M0024 |            | 0.81725 |      |     |                        |                          |
| 8     | V\$OCT1_07 | 7       | 1562 | (+) | TNTATGNTAATT           | ACTATTTTATTT             |
| M0013 |            | 0.79757 |      |     | NNNNNNNWATGCAAATNNNWNN |                          |
| 8     | V\$OCT1_04 | 4       | 1567 | (-) | W                      | TTTATTTTCTTACATAGATCTTG  |
| M0013 |            | 0.85618 |      |     |                        |                          |
| 7     | V\$OCT1_03 | 3       | 1606 | (-) | NNNRATAATNANNN         | TCATCCTTACCTG            |
| M0016 |            |         |      |     |                        |                          |
| 2     | V\$OCT1_06 | 0.85    | 1607 | (+) | CWNAWTKWSATRYN         | CATCCTTACCTGTC           |
| M0016 |            | 0.80039 |      |     |                        |                          |
| 2     | V\$OCT1_06 | 1       | 1670 | (+) | CWNAWTKWSATRYN         | AGATTCTAGATTCT           |
| M0013 |            | 0.75085 |      |     |                        |                          |
| 5     | V\$OCT1_01 | 8       | 1696 | (+) | NNNNWTATGCAAATNTNNN    | TCTCAAATGCAATTTGATG      |
| M0016 |            | 0.86835 |      |     |                        |                          |
| 2     | V\$OCT1_06 | 9       | 1703 | (+) | CWNAWTKWSATRYN         | TGCAATTTGATGCA           |
| M0013 |            | 0.80761 |      |     | NNNNNNNWATGCAAATNNNWNN | GCAATTT-                 |
| 8     | V\$OCT1_04 | 2       | 1704 | (+) | W                      | GATGCAAGTCTCATCA         |
| M0013 |            | 0.75524 |      |     |                        |                          |
| 5     | V\$OCT1_01 | 6       | 1706 | (+) | NNNNWTATGCAAATNTNNN    | AATTTGATGCAAGTCTCAT      |
| M0013 |            | 0.88463 |      |     |                        |                          |
| 7     | V\$OCT1_03 | 1       | 1743 | (+) | NNNRATAATNANNN         | GTCATAAAGAATT            |
| M0016 |            | 0.86835 |      |     |                        |                          |
| 2     | V\$OCT1_06 | 9       | 1749 | (+) | CWNAWTKWSATRYN         | AAGAATTTGATGGT           |
| M0016 |            | 0.81640 |      |     |                        |                          |
| 2     | V\$OCT1_06 | 6       | 1750 | (-) | CWNAWTKWSATRYN         | AGAATTTGATGGTC           |
| M0013 |            | 0.85894 |      |     |                        |                          |
| 7     | V\$OCT1_03 | 9       | 1763 | (-) | NNNRATAATNANNN         | CTCTAATTAGCTA            |
| M0016 |            | 0.81406 |      |     |                        |                          |
| 2     | V\$OCT1_06 | 2       | 1772 | (-) | CWNAWTKWSATRYN         | GCTATTAAAGTGTT           |
| M0016 |            | 0.81367 |      |     |                        |                          |
| 2     | V\$OCT1_06 | 2       | 1786 | (-) | CWNAWTKWSATRYN         | GATATTAAAGCTAT           |
| M0013 |            | 0.74666 |      |     |                        |                          |
| 5     | V\$OCT1_01 | 2       | 1792 | (+) | NNNNWTATGCAAATNTNNN    | AAAGCTATGGTAATCCTTC      |
| M0019 |            | 0.79284 |      |     |                        |                          |
| 5     | V\$OCT1_Q6 | 9       | 1794 | (+) | NNNNATGCAAATNAN        | AGCTATGGTAATCCT          |
| M0016 |            | 0.86900 |      |     |                        |                          |
| 1     | V\$OCT1_05 | 2       | 1795 | (-) | MKNATTTGCATAYY         | GCTATGGTAATCCT           |
| M0024 |            | 0.86495 |      |     |                        |                          |
| 8     | V\$OCT1_07 | 7       | 1795 | (+) | TNTATGNTAATT           | GCTATGGTAATC             |
| M0016 |            | 0.82148 |      |     |                        |                          |
| 2     | V\$OCT1_06 | 4       | 1804 | (+) | CWNAWTKWSATRYN         | ATCCTTCACATTTT           |
| M0019 |            | 0.81277 |      |     |                        |                          |
| 5     | V\$OCT1_Q6 | 3       | 1804 | (-) | NNNNATGCAAATNAN        | ATCCTTCACATTTTG          |
| M0016 |            | 0.81718 |      |     |                        |                          |
| 2     | V\$OCT1_06 | 7       | 1805 | (-) | CWNAWTKWSATRYN         | TCCTTCACATTTTG           |
| M0013 |            | 0.79130 |      |     | NNNNNNNWATGCAAATNNNWNN |                          |
| 8     | V\$OCT1_04 | 1       | 1806 | (-) | W                      | CCTTCACATTTTGATCATTATTA  |
| M0016 |            | 0.80976 |      |     |                        |                          |
| 2     | V\$OCT1_06 | 6       | 1810 | (+) | CWNAWTKWSATRYN         | CACATTTTGATCAT           |
| M0013 |            | 0.78356 |      |     | NNNNNNNWATGCAAATNNNWNN |                          |
| 8     | V\$OCT1_04 | 3       | 1814 | (+) | W                      | TTTTGATCATTATTATTCAGTTT  |
| M0013 |            | 0.88818 |      |     |                        |                          |
| 7     | V\$OCT1_03 | 6       | 1817 | (-) | NNNRATAATNANNN         | TGATCATTATTAT            |
| M0013 |            | 0.91347 |      |     |                        |                          |
| 7     | V\$OCT1_03 | 3       | 1820 | (-) | NNNRATAATNANNN         | TCATTATTATTCA            |
| M0013 |            | 0.78816 |      |     | NNNNNNNWATGCAAATNNNWNN |                          |
| 8     | V\$OCT1_04 | 4       | 1820 | (+) | W                      | TCATTATTATTTCAGTTTATTCAA |
| M0013 |            | 0.87384 |      |     |                        |                          |
| 6     | V\$OCT1_02 | 9       | 1822 | (+) | NNGAATATKCANNNN        | ATTATTATTTCAGTTT         |
| M0013 |            | 0.74685 |      |     |                        |                          |
| 5     | V\$OCT1_01 | 2       | 1831 | (+) | NNNNWTATGCAAATNTNNN    | CAGTTTATTCAAAGACTTA      |
| M0013 |            | 0.81700 |      |     |                        |                          |
| 6     | V\$OCT1_02 | 1       | 1831 | (+) | NNGAATATKCANNNN        | CAGTTTATTCAAAGA          |
| M0019 |            | 0.79039 |      |     |                        |                          |
| 5     | V\$OCT1_Q6 | 3       | 1833 | (+) | NNNNATGCAAATNAN        | GTTTATTCAAAGACT          |

|       |            |         |      |     |                        |                         |
|-------|------------|---------|------|-----|------------------------|-------------------------|
| M0016 |            | 0.86093 |      |     |                        |                         |
| 2     | V\$OCT1_06 | 7       | 1853 | (+) | CWNAWTKWSATRYN         | CTAAATAAAATTTTC         |
| M0016 |            | 0.84765 |      |     |                        |                         |
| 2     | V\$OCT1_06 | 6       | 1854 | (-) | CWNAWTKWSATRYN         | TAAATAAAATTTCT          |
| M0013 |            | 0.78753 |      |     | NNNNNNNWATGCAAATNNNWNN | ATTTCTAACTTGAAA-        |
| 8     | V\$OCT1_04 | 7       | 1862 | (+) | W                      | TATAAACA                |
| M0016 |            | 0.85507 |      |     |                        |                         |
| 2     | V\$OCT1_06 | 8       | 1867 | (+) | CWNAWTKWSATRYN         | TAACCTGAAATATA          |
| M0013 |            | 0.86408 |      |     |                        |                         |
| 7     | V\$OCT1_03 | 5       | 1886 | (+) | NNNRTAATNANNN          | CTCACAATTAAAA           |
| M0016 |            | 0.86835 |      |     |                        |                         |
| 2     | V\$OCT1_06 | 9       | 1888 | (+) | CWNAWTKWSATRYN         | CACAATTAATAAATT         |
| M0016 |            | 0.81601 |      |     |                        |                         |
| 2     | V\$OCT1_06 | 6       | 1888 | (-) | CWNAWTKWSATRYN         | CACAATTAATAAATT         |
| M0016 |            | 0.81367 |      |     |                        |                         |
| 2     | V\$OCT1_06 | 2       | 1889 | (-) | CWNAWTKWSATRYN         | ACAATTAATAAATTT         |
| M0013 |            | 0.80593 |      |     | NNNNNNNWATGCAAATNNNWNN | AATTAATAAATTTTAAAAA     |
| 8     | V\$OCT1_04 | 9       | 1891 | (+) | W                      | G                       |
| M0013 |            | 0.80259 |      |     | NNNNNNNWATGCAAATNNNWNN | ATTAATAAATTTTAAAAA      |
| 8     | V\$OCT1_04 | 3       | 1892 | (+) | W                      | GA                      |
| M0013 |            | 0.78962 |      |     | NNNNNNNWATGCAAATNNNWNN | ATTAATAAATTTTAAAAA      |
| 8     | V\$OCT1_04 | 8       | 1892 | (-) | W                      | GA                      |
| M0013 |            | 0.78377 |      |     | NNNNNNNWATGCAAATNNNWNN | TTAAAAATTTTAAAAA        |
| 8     | V\$OCT1_04 | 2       | 1893 | (+) | W                      | GAA                     |
| M0013 |            | 0.75562 |      |     |                        |                         |
| 5     | V\$OCT1_01 | 8       | 1912 | (+) | NNNNWTATGCAAATNTNNN    | AGAAATAAGGTAATTAACA     |
| M0024 |            | 0.87386 |      |     |                        |                         |
| 8     | V\$OCT1_07 | 1       | 1915 | (+) | TNTATGNTAATT           | AATAAGGTAATT            |
| M0013 |            | 0.84472 |      |     |                        |                         |
| 7     | V\$OCT1_03 | 5       | 1918 | (+) | NNNRTAATNANNN          | AAGGTAATTAACA           |
| M0024 |            | 0.80326 |      |     |                        |                         |
| 8     | V\$OCT1_07 | 5       | 1923 | (-) | TNTATGNTAATT           | AATTAACAATAC            |
| M0016 |            | 0.86054 |      |     |                        |                         |
| 2     | V\$OCT1_06 | 7       | 1942 | (-) | CWNAWTKWSATRYN         | AGCATCAAAGAAGG          |
| M0013 |            | 0.81848 |      |     | NNNNNNNWATGCAAATNNNWNN |                         |
| 8     | V\$OCT1_04 | 6       | 1981 | (-) | W                      | TTATAGGCTTAACATATTTGTAA |
| M0013 |            | 0.77699 |      |     |                        |                         |
| 5     | V\$OCT1_01 | 4       | 1983 | (-) | NNNNWTATGCAAATNTNNN    | ATAGGCTTAACATATTTGT     |
| M0016 |            | 0.87365 |      |     |                        |                         |
| 1     | V\$OCT1_05 | 1       | 1985 | (+) | MKNATTTGCATAYY         | AGGCTTAACATATT          |
| M0016 |            | 0.82148 |      |     |                        |                         |
| 2     | V\$OCT1_06 | 4       | 1985 | (+) | CWNAWTKWSATRYN         | AGGCTTAACATATT          |
| M0019 |            | 0.82614 |      |     |                        |                         |
| 5     | V\$OCT1_Q6 | 6       | 1985 | (-) | NNNNATGCAAATNAN        | AGGCTTAACATATTT         |
| M0013 |            | 0.79506 |      |     | NNNNNNNWATGCAAATNNNWNN |                         |
| 8     | V\$OCT1_04 | 5       | 1989 | (-) | W                      | TTAACATATTTGTAAACATATAT |
| M0013 |            | 0.78084 |      |     | NNNNNNNWATGCAAATNNNWNN | TAACATATTTGTAAACATA-    |
| 8     | V\$OCT1_04 | 5       | 1990 | (+) | W                      | TATA                    |
| M0013 |            | 0.75944 |      |     |                        |                         |
| 5     | V\$OCT1_01 | 3       | 1991 | (-) | NNNNWTATGCAAATNTNNN    | AACATATTTGTAAACATAT     |
| M0013 |            | 0.79527 |      |     | NNNNNNNWATGCAAATNNNWNN |                         |
| 8     | V\$OCT1_04 | 4       | 1993 | (-) | W                      | CATATTTGTAAACATATATATAT |
| M0013 |            | 0.80259 |      |     | NNNNNNNWATGCAAATNNNWNN | ATTTGTAAACAT-           |
| 8     | V\$OCT1_04 | 3       | 1996 | (+) | W                      | ATATATATCCA             |
| M0013 |            | 0.88897 |      |     |                        |                         |
| 7     | V\$OCT1_03 | 7       | 1997 | (+) | NNNRTAATNANNN          | TTTGTAAACATAT           |
| M0013 |            | 0.82998 |      |     | NNNNNNNWATGCAAATNNNWNN | TGTAAACATATATATATCCAA-  |
| 8     | V\$OCT1_04 | 7       | 1999 | (-) | W                      | TA                      |
| M0013 |            | 0.80886 |      |     | NNNNNNNWATGCAAATNNNWNN | GTAAACATATATATATCCAA-   |
| 8     | V\$OCT1_04 | 7       | 2000 | (+) | W                      | TAT                     |
| M0013 |            | 0.78335 |      |     | NNNNNNNWATGCAAATNNNWNN |                         |
| 8     | V\$OCT1_04 | 4       | 2005 | (-) | W                      | CATATATATATCCAATATTGTAT |
| M0013 |            | 0.73922 |      |     |                        |                         |
| 5     | V\$OCT1_01 | 2       | 2008 | (+) | NNNNWTATGCAAATNTNNN    | ATATATATCCAATATTGTA     |
| M0013 |            | 0.78180 |      |     |                        |                         |
| 6     | V\$OCT1_02 | 8       | 2008 | (+) | NNGAATATKCANNNN        | ATATATATCCAATAT         |

|       |            |         |      |     |                        |                        |
|-------|------------|---------|------|-----|------------------------|------------------------|
| M0016 |            |         |      |     |                        |                        |
| 2     | V\$OCT1_06 | 0.9375  | 2011 | (-) | CWNAWTKWSATRYN         | TATATCCAATATTG         |
| M0016 |            | 0.82656 |      |     |                        |                        |
| 2     | V\$OCT1_06 | 2       | 2018 | (+) | CWNAWTKWSATRYN         | AATATTGTATTACC         |
| M0013 |            | 0.73540 |      |     |                        |                        |
| 5     | V\$OCT1_01 | 6       | 2021 | (-) | NNNNWTATGCAAATNTNNN    | ATTGTATTACCAAATATAC    |
| M0024 |            | 0.79520 |      |     |                        |                        |
| 8     | V\$OCT1_07 | 9       | 2025 | (-) | TNTATGNTAATT           | TATTACCAAATA           |
| M0016 |            | 0.85703 |      |     |                        |                        |
| 2     | V\$OCT1_06 | 1       | 2116 | (+) | CWNAWTKWSATRYN         | ATCCCTGGGATTCT         |
| M0016 |            | 0.86835 |      |     |                        |                        |
| 2     | V\$OCT1_06 | 9       | 2172 | (-) | CWNAWTKWSATRYN         | TGCATGAAAGTGAA         |
| M0013 |            | 0.80614 |      |     | NNNNNNNNWATGCAAATNNNWN | GCATGAAAGTGAAAAGTGAAA  |
| 8     | V\$OCT1_04 | 8       | 2173 | (+) | W                      | GT                     |
| M0016 |            | 0.87773 |      |     |                        |                        |
| 2     | V\$OCT1_06 | 4       | 2252 | (+) | CWNAWTKWSATRYN         | ATCCATGGGATTTT         |
| M0016 |            | 0.83476 |      |     |                        |                        |
| 2     | V\$OCT1_06 | 6       | 2328 | (-) | CWNAWTKWSATRYN         | TATATTCCAGTGTA         |
| M0016 |            | 0.87343 |      |     |                        |                        |
| 2     | V\$OCT1_06 | 7       | 2338 | (-) | CWNAWTKWSATRYN         | TGTATCCACTTTTG         |
| M0016 |            | 0.86289 |      |     |                        |                        |
| 2     | V\$OCT1_06 | 1       | 2439 | (-) | CWNAWTKWSATRYN         | AAGATCTAATAATT         |
| M0013 |            | 0.85499 |      |     |                        |                        |
| 7     | V\$OCT1_03 | 8       | 2441 | (+) | NNNRATAATNANNN         | GATCTAATAATTT          |
| M0013 |            | 0.88660 |      |     |                        |                        |
| 7     | V\$OCT1_03 | 6       | 2444 | (+) | NNNRATAATNANNN         | CTAATAATTTGGT          |
| M0013 |            | 0.83124 |      |     | NNNNNNNNWATGCAAATNNNWN | ACTAGATAATGTAAAGTAACT- |
| 8     | V\$OCT1_04 | 2       | 2473 | (+) | W                      | TA                     |
| M0013 |            | 0.85420 |      |     |                        |                        |
| 7     | V\$OCT1_03 | 8       | 2475 | (+) | NNNRATAATNANNN         | TAGATAATGTAAA          |
| M0016 |            | 0.85507 |      |     |                        |                        |
| 2     | V\$OCT1_06 | 8       | 2477 | (+) | CWNAWTKWSATRYN         | GATAATGTAAAGTA         |
| M0019 |            | 0.83651 |      |     |                        |                        |
| 5     | V\$OCT1_Q6 | 7       | 2477 | (+) | NNNNATGCAAATNAN        | GATAATGTAAAGTAA        |
| M0024 |            | 0.79308 |      |     |                        |                        |
| 8     | V\$OCT1_07 | 9       | 2478 | (+) | TNTATGNTAATT           | ATAATGTAAAGT           |
| M0016 |            | 0.80078 |      |     |                        |                        |
| 2     | V\$OCT1_06 | 1       | 2488 | (+) | CWNAWTKWSATRYN         | GTAACCTAAGTTTC         |
| M0016 |            | 0.85273 |      |     |                        |                        |
| 2     | V\$OCT1_06 | 4       | 2508 | (-) | CWNAWTKWSATRYN         | AAAAACAAATTCAG         |
| M0013 |            | 0.78668 |      |     |                        |                        |
| 6     | V\$OCT1_02 | 1       | 2510 | (+) | NNGAATATKCANNNN        | AAACAAATTCAGTTA        |
| M0016 |            | 0.80937 |      |     |                        |                        |
| 2     | V\$OCT1_06 | 5       | 2513 | (+) | CWNAWTKWSATRYN         | CAAATTCAGTTATT         |
| M0016 |            | 0.80859 |      |     |                        |                        |
| 2     | V\$OCT1_06 | 4       | 2513 | (-) | CWNAWTKWSATRYN         | CAAATTCAGTTATT         |
| M0016 |            | 0.82148 |      |     |                        |                        |
| 2     | V\$OCT1_06 | 4       | 2519 | (+) | CWNAWTKWSATRYN         | CAGTTATTAATGTG         |
| M0016 |            | 0.85234 |      |     |                        |                        |
| 2     | V\$OCT1_06 | 4       | 2524 | (+) | CWNAWTKWSATRYN         | ATTAATGTGAAACA         |
| M0016 |            | 0.80039 |      |     |                        |                        |
| 2     | V\$OCT1_06 | 1       | 2531 | (-) | CWNAWTKWSATRYN         | TGAAACAAAAAGTT         |
| M0016 |            | 0.80429 |      |     |                        |                        |
| 2     | V\$OCT1_06 | 7       | 2536 | (+) | CWNAWTKWSATRYN         | CAAAAAGTTATTCT         |
| M0016 |            | 0.85703 |      |     |                        |                        |
| 2     | V\$OCT1_06 | 1       | 2636 | (+) | CWNAWTKWSATRYN         | ATCCCTGGGATTCT         |
| M0019 |            | 0.80403 |      |     |                        |                        |
| 5     | V\$OCT1_Q6 | 9       | 2691 | (+) | NNNNATGCAAATNAN        | ATGCATGAAAGTGAG        |
| M0016 |            | 0.95078 |      |     |                        |                        |
| 2     | V\$OCT1_06 | 1       | 2692 | (-) | CWNAWTKWSATRYN         | TGCATGAAAGTGAG         |
| M0016 |            | 0.80859 |      |     |                        |                        |
| 2     | V\$OCT1_06 | 4       | 2721 | (+) | CWNAWTKWSATRYN         | CGCTCAGTCATGTC         |
| M0016 |            | 0.87773 |      |     |                        |                        |
| 2     | V\$OCT1_06 | 4       | 2779 | (+) | CWNAWTKWSATRYN         | GTCCATGGGATTTT         |
| M0013 |            | 0.84295 |      |     | NNNNNNNNWATGCAAATNNNWN | TCTAGATAATGATAAATAAA-  |
| 8     | V\$OCT1_04 | 3       | 2842 | (+) | W                      | TAA                    |

|       |            |         |      |     |                         |                        |
|-------|------------|---------|------|-----|-------------------------|------------------------|
| M0013 |            | 0.93046 |      |     |                         |                        |
| 7     | V\$OCT1_03 | 2       | 2844 | (+) | NNNRTAATNANNN           | TAGATAATGATAA          |
| M0013 |            | 0.79464 |      |     | NNNNNNNNWATGCAAATNNNWNN | TAGATAATGATAAATAAA-    |
| 8     | V\$OCT1_04 | 7       | 2844 | (-) | W                       | TAAAT                  |
| M0013 |            |         |      |     | NNNNNNNNWATGCAAATNNNWNN | AGATAATGATAAATAAATAAA- |
| 8     | V\$OCT1_04 | 0.79151 | 2845 | (+) | W                       | TA                     |
| M0013 |            | 0.84630 |      |     |                         |                        |
| 7     | V\$OCT1_03 | 6       | 2850 | (+) | NNNRTAATNANNN           | ATGATAAATAAAT          |
| M0013 |            | 0.85578 |      |     |                         |                        |
| 7     | V\$OCT1_03 | 8       | 2858 | (+) | NNNRTAATNANNN           | TAAATAAATAGGA          |
| M0016 |            | 0.82148 |      |     |                         |                        |
| 2     | V\$OCT1_06 | 4       | 2878 | (-) | CWNAWTKWSATRYN          | GACAAGAAAGTGAT         |
| M0016 |            | 0.83437 |      |     |                         |                        |
| 2     | V\$OCT1_06 | 5       | 2881 | (+) | CWNAWTKWSATRYN          | AAGAAAGTGATTCA         |
| M0013 |            | 0.82099 |      |     | NNNNNNNNWATGCAAATNNNWNN | AGAAAGTGATTCAAATAAGA-  |
| 8     | V\$OCT1_04 | 5       | 2882 | (+) | W                       | TAA                    |
| M0019 |            | 0.82532 |      |     |                         |                        |
| 5     | V\$OCT1_Q6 | 8       | 2886 | (+) | NNNNATGCAAATNAN         | AGTGATTCAAATAAG        |
| M0013 |            | 0.79924 |      |     | NNNNNNNNWATGCAAATNNNWNN |                        |
| 8     | V\$OCT1_04 | 7       | 2902 | (+) | W                       | TAATAGTTTTGGATATTGGACA |
| M0013 |            | 0.79587 |      |     |                         |                        |
| 5     | V\$OCT1_01 | 9       | 2903 | (-) | NNNNWTATGCAAATNTNNN     | AATAGTTTTGGATATTGG     |
| M0016 |            | 0.83437 |      |     |                         |                        |
| 2     | V\$OCT1_06 | 5       | 2905 | (+) | CWNAWTKWSATRYN          | TAGTTTTGGATATT         |
| M0013 |            | 0.79182 |      |     |                         |                        |
| 6     | V\$OCT1_02 | 5       | 2907 | (-) | NNGAATATKCANNNN         | GTTTTGGATATTGG         |
| M0013 |            | 0.78634 |      |     |                         |                        |
| 5     | V\$OCT1_01 | 1       | 2911 | (-) | NNNNWTATGCAAATNTNNN     | TGGATATTGGGACACTCAA    |
| M0016 |            | 0.83945 |      |     |                         |                        |
| 2     | V\$OCT1_06 | 3       | 2913 | (+) | CWNAWTKWSATRYN          | GATATTGGGACACT         |
| M0016 |            | 0.82929 |      |     |                         |                        |
| 2     | V\$OCT1_06 | 7       | 2929 | (+) | CWNAWTKWSATRYN          | AACTATCAAATATA         |
| M0016 |            | 0.86562 |      |     |                         |                        |
| 2     | V\$OCT1_06 | 5       | 2930 | (-) | CWNAWTKWSATRYN          | ACTATCAAATATAG         |
| M0016 |            | 0.81718 |      |     |                         |                        |
| 2     | V\$OCT1_06 | 7       | 2935 | (+) | CWNAWTKWSATRYN          | CAAATATAGATGAA         |
| M0013 |            | 0.81074 |      |     | NNNNNNNNWATGCAAATNNNWNN | AAA-                   |
| 8     | V\$OCT1_04 | 9       | 2936 | (+) | W                       | TATAGATGAAAAAGTTTCTG   |
| M0016 |            | 0.84218 |      |     |                         |                        |
| 2     | V\$OCT1_06 | 7       | 2941 | (-) | CWNAWTKWSATRYN          | TAGATGAAAAAGTT         |
| M0016 |            | 0.89843 |      |     |                         |                        |
| 2     | V\$OCT1_06 | 7       | 2952 | (+) | CWNAWTKWSATRYN          | GTTTCTGAAATGCT         |
| M0016 |            | 0.85507 |      |     |                         |                        |
| 2     | V\$OCT1_06 | 8       | 2960 | (+) | CWNAWTKWSATRYN          | AATGCTGAGATATT         |
| M0013 |            | 0.73826 |      |     |                         |                        |
| 5     | V\$OCT1_01 | 8       | 2965 | (+) | NNNNWTATGCAAATNTNNN     | TGAGATATTCTATTGTAA     |
| M0016 |            | 0.82187 |      |     |                         |                        |
| 2     | V\$OCT1_06 | 5       | 2968 | (-) | CWNAWTKWSATRYN          | GATATTCTATTGTT         |
| M0013 |            | 0.81012 |      |     | NNNNNNNNWATGCAAATNNNWNN |                        |
| 8     | V\$OCT1_04 | 1       | 2986 | (-) | W                       | TCTTATTTCTAAATTGTAAATA |
| M0019 |            | 0.81386 |      |     |                         |                        |
| 5     | V\$OCT1_Q6 | 5       | 2996 | (+) | NNNNATGCAAATNAN         | TAAATTGTAAATAAT        |
| M0016 |            | 0.84726 |      |     |                         |                        |
| 2     | V\$OCT1_06 | 6       | 2997 | (-) | CWNAWTKWSATRYN          | AAATTGTAAATAAT         |
| M0013 |            | 0.78316 |      |     |                         |                        |
| 6     | V\$OCT1_02 | 2       | 2999 | (-) | NNGAATATKCANNNN         | ATTGTAAATAATGAT        |
| M0013 |            | 0.88344 |      |     |                         |                        |
| 7     | V\$OCT1_03 | 5       | 3003 | (+) | NNNRTAATNANNN           | TAAATAATGATTG          |
| M0016 |            | 0.95039 |      |     |                         |                        |
| 2     | V\$OCT1_06 | 1       | 3074 | (-) | CWNAWTKWSATRYN          | AGCATCAAAAGATG         |
| M0013 |            | 0.80999 |      |     |                         |                        |
| 5     | V\$OCT1_01 | 6       | 3079 | (+) | NNNNWTATGCAAATNTNNN     | CAAAAGATGGAAATATCTG    |
| M0019 |            | 0.79694 |      |     |                         |                        |
| 5     | V\$OCT1_Q6 | 3       | 3081 | (+) | NNNNATGCAAATNAN         | AAAGATGGAAATATC        |
| M0016 |            | 0.82148 |      |     |                         |                        |
| 2     | V\$OCT1_06 | 4       | 3082 | (+) | CWNAWTKWSATRYN          | AAGATGGAAATATC         |

|       |            |         |      |     |                        |                         |
|-------|------------|---------|------|-----|------------------------|-------------------------|
| M0016 |            | 0.81210 |      |     |                        |                         |
| 2     | V\$OCT1_06 | 9       | 3082 | (-) | CWNAWTKWSATRYN         | AAGATGGAAATATC          |
| M0016 |            | 0.86562 |      |     |                        |                         |
| 2     | V\$OCT1_06 | 5       | 3092 | (-) | CWNAWTKWSATRYN         | TATCTGACAGTAAG          |
| M0016 |            | 0.82695 |      |     |                        |                         |
| 2     | V\$OCT1_06 | 3       | 3116 | (-) | CWNAWTKWSATRYN         | AGGATCCAAGTTCT          |
| M0016 |            | 0.82148 |      |     |                        |                         |
| 2     | V\$OCT1_06 | 4       | 3205 | (+) | CWNAWTKWSATRYN         | GATTCTTTAATCCT          |
| M0013 |            |         |      |     | NNNNNNNWATGCAAATNNNWNN |                         |
| 8     | V\$OCT1_04 | 0.80092 | 3231 | (-) | W                      | ACATCATTTTTTAATGCTAACAT |
| M0016 |            |         |      |     |                        |                         |
| 2     | V\$OCT1_06 | 0.9375  | 3235 | (+) | CWNAWTKWSATRYN         | CATTTTTTAATGCT          |
| M0013 |            | 0.74685 |      |     |                        |                         |
| 5     | V\$OCT1_01 | 2       | 3238 | (+) | NNNNWTATGCAAATNTNNN    | TTTTTAATGCTAACATTTA     |
| M0016 |            | 0.84218 |      |     |                        |                         |
| 2     | V\$OCT1_06 | 7       | 3249 | (-) | CWNAWTKWSATRYN         | AACATTTAACAAAC          |
| M0013 |            | 0.80280 |      |     | NNNNNNNWATGCAAATNNNWNN | ACATTTAACAAACATAAATCTT  |
| 8     | V\$OCT1_04 | 2       | 3250 | (-) | W                      | G                       |
| M0024 |            | 0.79732 |      |     |                        |                         |
| 8     | V\$OCT1_07 | 9       | 3252 | (-) | TNTATGNTAATT           | ATTTAACAAACA            |
| M0024 |            | 0.79245 |      |     |                        |                         |
| 8     | V\$OCT1_07 | 3       | 3256 | (-) | TNTATGNTAATT           | AACAAACATAAA            |
| M0013 |            | 0.81534 |      |     | NNNNNNNWATGCAAATNNNWNN | CAGTTAAATGCAGATTGAG-    |
| 8     | V\$OCT1_04 | 9       | 3279 | (+) | W                      | TTA                     |
| M0013 |            | 0.75829 |      |     |                        |                         |
| 5     | V\$OCT1_01 | 8       | 3281 | (+) | NNNNWTATGCAAATNTNNN    | GTAAAAATGCAGATTGAGT     |
| M0013 |            | 0.84298 |      |     |                        |                         |
| 6     | V\$OCT1_02 | 9       | 3281 | (+) | NNGAATATKCANNNN        | GTAAAAATGCAGATT         |
| M0013 |            | 0.80265 |      |     |                        |                         |
| 6     | V\$OCT1_02 | 3       | 3284 | (-) | NNGAATATKCANNNN        | AAAATGCAGATTGAG         |
| M0024 |            | 0.79987 |      |     |                        |                         |
| 8     | V\$OCT1_07 | 3       | 3284 | (+) | TNTATGNTAATT           | AAAATGCAGATT            |
| M0013 |            | 0.79088 |      |     | NNNNNNNWATGCAAATNNNWNN | GCAGATTGAG-             |
| 8     | V\$OCT1_04 | 2       | 3289 | (+) | W                      | TTAAAATTTTATA           |
| M0016 |            | 0.82656 |      |     |                        |                         |
| 2     | V\$OCT1_06 | 2       | 3295 | (-) | CWNAWTKWSATRYN         | TGAGTTAAAATTTT          |
| M0013 |            | 0.79736 |      |     | NNNNNNNWATGCAAATNNNWNN |                         |
| 8     | V\$OCT1_04 | 5       | 3298 | (-) | W                      | GTAAAAATTTTATATAATTTAAT |
| M0013 |            | 0.75486 |      |     |                        |                         |
| 5     | V\$OCT1_01 | 5       | 3300 | (-) | NNNNWTATGCAAATNTNNN    | TAAAATTTTATATAATTTA     |
| M0016 |            |         |      |     |                        |                         |
| 2     | V\$OCT1_06 | 0.825   | 3300 | (+) | CWNAWTKWSATRYN         | TAAAATTTTATATA          |
| M0016 |            | 0.86835 |      |     |                        |                         |
| 2     | V\$OCT1_06 | 9       | 3310 | (+) | CWNAWTKWSATRYN         | TATAATTTAATTTA          |
| M0024 |            | 0.83167 |      |     |                        |                         |
| 8     | V\$OCT1_07 | 3       | 3310 | (+) | TNTATGNTAATT           | TATAATTTAATT            |
| M0013 |            | 0.78711 |      |     | NNNNNNNWATGCAAATNNNWNN | ATAATTTAATTATGA-        |
| 8     | V\$OCT1_04 | 8       | 3311 | (+) | W                      | TAAAAAA                 |
| M0016 |            | 0.84765 |      |     |                        |                         |
| 2     | V\$OCT1_06 | 6       | 3311 | (-) | CWNAWTKWSATRYN         | ATAATTTAATTTAT          |
| M0013 |            | 0.78105 |      |     | NNNNNNNWATGCAAATNNNWNN | AATTTAATTTATGATAAAAAA-  |
| 8     | V\$OCT1_04 | 4       | 3313 | (-) | W                      | TA                      |
| M0013 |            | 0.84776 |      |     | NNNNNNNWATGCAAATNNNWNN | TTTAATTTATGATAAAAAA-    |
| 8     | V\$OCT1_04 | 2       | 3315 | (+) | W                      | TAAA                    |
| M0013 |            | 0.77666 |      |     |                        |                         |
| 6     | V\$OCT1_02 | 5       | 3332 | (+) | NNGAATATKCANNNN        | AATAAAATCCAGACA         |
| M0016 |            | 0.85507 |      |     |                        |                         |
| 2     | V\$OCT1_06 | 8       | 3349 | (+) | CWNAWTKWSATRYN         | CAGTATTTTACAGATT        |
| M0016 |            | 0.84218 |      |     |                        |                         |
| 2     | V\$OCT1_06 | 7       | 3350 | (-) | CWNAWTKWSATRYN         | AGTATTTTACAGATTA        |
| M0013 |            | 0.84551 |      |     |                        |                         |
| 7     | V\$OCT1_03 | 6       | 3355 | (-) | NNNRTAATNANNN          | TTCAGATTATTTT           |
| M0013 |            |         |      |     | NNNNNNNWATGCAAATNNNWNN |                         |
| 8     | V\$OCT1_04 | 0.80803 | 3365 | (-) | W                      | TTTTTGCTTTTTATATACTTTT  |
| M0013 |            | 0.79548 |      |     | NNNNNNNWATGCAAATNNNWNN |                         |
| 8     | V\$OCT1_04 | 3       | 3371 | (-) | W                      | TCTTTTTATATACTTTTCTCCAC |



|       |            |         |      |     |                        |                         |
|-------|------------|---------|------|-----|------------------------|-------------------------|
| M0013 |            | 0.75944 |      |     |                        |                         |
| 5     | V\$OCT1_01 | 3       | 3391 | (+) | NNNNWTATGCAAATNTNNN    | CACCATATTCTAAAAACAG     |
| M0013 |            | 0.80265 |      |     |                        |                         |
| 6     | V\$OCT1_02 | 3       | 3391 | (+) | NNGAATATKCANNNN        | CACCATATTCTAAAA         |
| M0016 |            | 0.83437 |      |     |                        |                         |
| 2     | V\$OCT1_06 | 5       | 3412 | (+) | CWNAWTKWSATRYN         | GATAATTTACTTTT          |
| M0016 |            | 0.83437 |      |     |                        |                         |
| 2     | V\$OCT1_06 | 5       | 3413 | (+) | CWNAWTKWSATRYN         | ATAATTTACTTTTC          |
| M0019 |            | 0.84033 |      |     |                        |                         |
| 5     | V\$OCT1_Q6 | 8       | 3413 | (-) | NNNNATGCAAATNAN        | ATAATTTACTTTTCT         |
| M0016 |            | 0.83164 |      |     |                        |                         |
| 2     | V\$OCT1_06 | 1       | 3421 | (+) | CWNAWTKWSATRYN         | CTTTTCTTGATTTT          |
| M0016 |            | 0.86562 |      |     |                        |                         |
| 2     | V\$OCT1_06 | 5       | 3470 | (-) | CWNAWTKWSATRYN         | GGTGTCAAATTTAG          |
| M0016 |            | 0.89414 |      |     |                        |                         |
| 2     | V\$OCT1_06 | 1       | 3475 | (+) | CWNAWTKWSATRYN         | CAAATTTAGCTGTT          |
| M0013 |            |         |      |     | NNNNNNNWATGCAAATNNNWNN | ATTAGCTGTAAAAACAAAC     |
| 8     | V\$OCT1_04 | 0.79381 | 3478 | (+) | W                      | T                       |
| M0016 |            | 0.94023 |      |     |                        |                         |
| 2     | V\$OCT1_06 | 4       | 3511 | (+) | CWNAWTKWSATRYN         | CACTATTAATGTGA          |
| M0013 |            | 0.82622 |      |     | NNNNNNNWATGCAAATNNNWNN | AC-                     |
| 8     | V\$OCT1_04 | 3       | 3512 | (+) | W                      | TATTAAATGTATAGTATTACA   |
| M0016 |            | 0.82656 |      |     |                        |                         |
| 2     | V\$OCT1_06 | 2       | 3512 | (-) | CWNAWTKWSATRYN         | ACTATTAATGTAT           |
| M0013 |            | 0.77260 |      |     |                        |                         |
| 6     | V\$OCT1_02 | 4       | 3517 | (-) | NNGAATATKCANNNN        | TAAATGTATAGTATT         |
| M0016 |            | 0.82109 |      |     |                        |                         |
| 2     | V\$OCT1_06 | 4       | 3517 | (-) | CWNAWTKWSATRYN         | TAAATGTATAGTAT          |
| M0016 |            | 0.86562 |      |     |                        |                         |
| 2     | V\$OCT1_06 | 5       | 3525 | (+) | CWNAWTKWSATRYN         | TAGTATTACATGTG          |
| M0016 |            | 0.83437 |      |     |                        |                         |
| 2     | V\$OCT1_06 | 5       | 3526 | (-) | CWNAWTKWSATRYN         | AGTATTACATGTGC          |
| M0016 |            | 0.82656 |      |     |                        |                         |
| 2     | V\$OCT1_06 | 2       | 3537 | (+) | CWNAWTKWSATRYN         | TGCCTTGTGATATT          |
| M0013 |            | 0.80489 |      |     | NNNNNNNWATGCAAATNNNWNN |                         |
| 8     | V\$OCT1_04 | 3       | 3541 | (-) | W                      | TTGTGATATTATTATTATTGTAT |
| M0013 |            | 0.79171 |      |     | NNNNNNNWATGCAAATNNNWNN |                         |
| 8     | V\$OCT1_04 | 9       | 3544 | (-) | W                      | TGATATTATTATTATTGTATTTT |
| M0013 |            | 0.90636 |      |     |                        |                         |
| 7     | V\$OCT1_03 | 1       | 3546 | (-) | NNNRTAATNANNN          | ATATTATTATTAT           |
| M0013 |            | 0.79109 |      |     | NNNNNNNWATGCAAATNNNWNN |                         |
| 8     | V\$OCT1_04 | 2       | 3546 | (+) | W                      | ATATTATTATTATTGTATTTTGA |
| M0013 |            | 0.87356 |      |     |                        |                         |
| 7     | V\$OCT1_03 | 8       | 3549 | (-) | NNNRTAATNANNN          | TTATTATTATTGT           |
| M0016 |            | 0.80585 |      |     |                        |                         |
| 2     | V\$OCT1_06 | 9       | 3554 | (+) | CWNAWTKWSATRYN         | ATTATTGTATTTTG          |
| M0024 |            | 0.81513 |      |     |                        |                         |
| 8     | V\$OCT1_07 | 7       | 3554 | (+) | TNTATGNTAATT           | ATTATTGTATTT            |
| M0013 |            | 0.78377 |      |     | NNNNNNNWATGCAAATNNNWNN |                         |
| 8     | V\$OCT1_04 | 2       | 3556 | (-) | W                      | TATTGTATTTTGAGTGCTTTTGG |
| M0016 |            | 0.80039 |      |     |                        |                         |
| 2     | V\$OCT1_06 | 1       | 3560 | (+) | CWNAWTKWSATRYN         | GTATTTTGAGTGCT          |
| M0016 |            | 0.80585 |      |     |                        |                         |
| 2     | V\$OCT1_06 | 9       | 3577 | (-) | CWNAWTKWSATRYN         | GGTTTACAATTCT           |
| M0013 |            | 0.80677 |      |     | NNNNNNNWATGCAAATNNNWNN |                         |
| 8     | V\$OCT1_04 | 5       | 3581 | (-) | W                      | TTACAATTCTGCATTTTTTTTT  |
| M0013 |            | 0.76592 |      |     |                        |                         |
| 5     | V\$OCT1_01 | 9       | 3583 | (-) | NNNNWTATGCAAATNTNNN    | ACAATTCTTGCATTTTTTTT    |
| M0016 |            | 0.88554 |      |     |                        |                         |
| 2     | V\$OCT1_06 | 7       | 3585 | (+) | CWNAWTKWSATRYN         | AATTCTTGCATTTT          |
| M0013 |            | 0.85056 |      |     |                        |                         |
| 6     | V\$OCT1_02 | 8       | 3587 | (-) | NNGAATATKCANNNN        | TTCTTGCATTTTTTTT        |
| M0013 |            | 0.81430 |      |     | NNNNNNNWATGCAAATNNNWNN |                         |
| 8     | V\$OCT1_04 | 4       | 3595 | (-) | W                      | TTTTTTTTTAAACAGAAACATCC |
| M0016 |            | 0.80429 |      |     |                        |                         |
| 2     | V\$OCT1_06 | 7       | 3611 | (-) | CWNAWTKWSATRYN         | AACATCCTATCAAG          |

|       |            |         |      |     |                         |                          |
|-------|------------|---------|------|-----|-------------------------|--------------------------|
| M0016 |            |         |      |     |                         |                          |
| 2     | V\$OCT1_06 | 0.80625 | 3671 | (+) | CWNAWTKWSATRYN          | CTCACTGTAAATTG           |
| M0024 |            | 0.81725 |      |     |                         |                          |
| 8     | V\$OCT1_07 | 7       | 3672 | (+) | TNTATGNTAATT            | TCACTGTAAATT             |
| M0013 |            | 0.80468 |      |     | NNNNNNNNWATGCAAATNNNWNN | ATGATAAATT-              |
| 8     | V\$OCT1_04 | 4       | 3698 | (+) | W                       | GCTAATATATATA            |
| M0013 |            | 0.73845 |      |     |                         |                          |
| 5     | V\$OCT1_01 | 9       | 3700 | (+) | NNNNWTATGCAAATNTNNN     | GATAAATTGCTAATATATA      |
| M0013 |            | 0.78398 |      |     | NNNNNNNNWATGCAAATNNNWNN |                          |
| 8     | V\$OCT1_04 | 2       | 3707 | (-) | W                       | TGCTAATATATATATTGTAGTCT  |
| M0016 |            | 0.80937 |      |     |                         |                          |
| 2     | V\$OCT1_06 | 5       | 3709 | (+) | CWNAWTKWSATRYN          | CTAATATATATATT           |
| M0016 |            | 0.84257 |      |     |                         |                          |
| 2     | V\$OCT1_06 | 8       | 3756 | (+) | CWNAWTKWSATRYN          | CAGTTTCACATTCTG          |
| M0013 |            | 0.84788 |      |     |                         |                          |
| 7     | V\$OCT1_03 | 6       | 3774 | (+) | NNNRATAATNANNN          | GGTGTAATATCTT            |
| M0013 |            | 0.90037 |      |     |                         |                          |
| 6     | V\$OCT1_02 | 9       | 3795 | (-) | NNGAATATKCANNNN         | GAGCTGAATATTGAT          |
| M0013 |            | 0.81402 |      |     |                         |                          |
| 6     | V\$OCT1_02 | 3       | 3798 | (+) | NNGAATATKCANNNN         | CTGAATATTGATCTG          |
| M0019 |            |         |      |     |                         |                          |
| 5     | V\$OCT1_Q6 | 0.80131 | 3839 | (-) | NNNNATGCAAATNAN         | GGCATTGGACTTAC           |
| M0013 |            | 0.83584 |      |     | NNNNNNNNWATGCAAATNNNWNN |                          |
| 8     | V\$OCT1_04 | 3       | 3841 | (-) | W                       | CATTGGACTTACATATTTATGA   |
| M0013 |            | 0.80999 |      |     |                         |                          |
| 5     | V\$OCT1_01 | 6       | 3843 | (-) | NNNNWTATGCAAATNTNNN     | TTTGGACTTACATATTTAT      |
| M0016 |            | 0.85546 |      |     |                         |                          |
| 2     | V\$OCT1_06 | 9       | 3845 | (+) | CWNAWTKWSATRYN          | TGGACTTACATATT           |
| M0019 |            |         |      |     |                         |                          |
| 5     | V\$OCT1_Q6 | 0.80786 | 3845 | (-) | NNNNATGCAAATNAN         | TGGACTTACATATTT          |
| M0013 |            | 0.82891 |      |     |                         |                          |
| 6     | V\$OCT1_02 | 2       | 3847 | (-) | NNGAATATKCANNNN         | GACTTACATATTTAT          |
| M0013 |            | 0.78481 |      |     | NNNNNNNNWATGCAAATNNNWNN |                          |
| 8     | V\$OCT1_04 | 8       | 3848 | (+) | W                       | ACTTACATATTTATGATTAATAA  |
| M0013 |            | 0.88660 |      |     |                         |                          |
| 7     | V\$OCT1_03 | 6       | 3852 | (-) | NNNRATAATNANNN          | ACATATTTATGAT            |
| M0013 |            | 0.85654 |      |     | NNNNNNNNWATGCAAATNNNWNN | ACATATTTATGATTAA-        |
| 8     | V\$OCT1_04 | 5       | 3852 | (+) | W                       | TAAAAAT                  |
| M0013 |            | 0.78523 |      |     | NNNNNNNNWATGCAAATNNNWNN |                          |
| 8     | V\$OCT1_04 | 6       | 3855 | (+) | W                       | TATTTATGATTAATAAAAAATTTT |
| M0013 |            | 0.87080 |      |     |                         |                          |
| 7     | V\$OCT1_03 | 2       | 3858 | (-) | NNNRATAATNANNN          | TTATGATTAATAA            |
| M0013 |            |         |      |     | NNNNNNNNWATGCAAATNNNWNN |                          |
| 8     | V\$OCT1_04 | 0.82936 | 3859 | (+) | W                       | TATGATTAATAAAAAATTTATTA  |
| M0013 |            | 0.81974 |      |     | NNNNNNNNWATGCAAATNNNWNN |                          |
| 8     | V\$OCT1_04 | 1       | 3860 | (-) | W                       | ATGATTAATAAAAAATTTTATTAT |
| M0013 |            | 0.85104 |      |     |                         |                          |
| 7     | V\$OCT1_03 | 7       | 3864 | (+) | NNNRATAATNANNN          | TTAATAAAAAATTT           |
| M0016 |            | 0.82656 |      |     |                         |                          |
| 2     | V\$OCT1_06 | 2       | 3870 | (+) | CWNAWTKWSATRYN          | AAAATTTTATTATG           |
| M0016 |            | 0.88164 |      |     |                         |                          |
| 2     | V\$OCT1_06 | 1       | 3870 | (-) | CWNAWTKWSATRYN          | AAAATTTTATTATG           |
| M0013 |            |         |      |     |                         |                          |
| 7     | V\$OCT1_03 | 0.92098 | 3873 | (-) | NNNRATAATNANNN          | ATTTTATTATGCA            |
| M0013 |            | 0.78335 |      |     | NNNNNNNNWATGCAAATNNNWNN | ATTTTATTATGCAAGAGCAG-    |
| 8     | V\$OCT1_04 | 4       | 3873 | (+) | W                       | TAG                      |
| M0013 |            | 0.79416 |      |     |                         |                          |
| 5     | V\$OCT1_01 | 3       | 3875 | (+) | NNNNWTATGCAAATNTNNN     | TTTATTATGCAAGAGCAGT      |
| M0013 |            | 0.83811 |      |     |                         |                          |
| 6     | V\$OCT1_02 | 6       | 3875 | (+) | NNGAATATKCANNNN         | TTTATTATGCAAGAG          |
| M0013 |            | 0.80265 |      |     |                         |                          |
| 6     | V\$OCT1_02 | 3       | 3898 | (-) | NNGAATATKCANNNN         | AAACAGAATATGTAT          |
| M0013 |            | 0.78858 |      |     | NNNNNNNNWATGCAAATNNNWNN | AACAGAA-                 |
| 8     | V\$OCT1_04 | 2       | 3899 | (+) | W                       | TATGTATATGTGGTCT         |
| M0013 |            | 0.75791 |      |     |                         |                          |
| 5     | V\$OCT1_01 | 7       | 3900 | (-) | NNNNWTATGCAAATNTNNN     | ACAGAATATGTATATGTGG      |

|       |            |         |      |     |                        |                         |
|-------|------------|---------|------|-----|------------------------|-------------------------|
| M0013 |            |         |      |     |                        |                         |
| 5     | V\$OCT1_01 | 0.80351 | 3901 | (+) | NNNNWTATGCAAATNTNNN    | CAGAATATGTATATGTGGT     |
| M0013 |            | 0.85462 |      |     |                        |                         |
| 6     | V\$OCT1_02 | 9       | 3901 | (+) | NNGAATATKCANNNN        | CAGAATATGTATATG         |
| M0016 |            |         |      |     |                        |                         |
| 2     | V\$OCT1_06 | 0.88125 | 3904 | (-) | CWNAWTKWSATRYN         | AATATGTATATGTG          |
| M0016 |            | 0.80546 |      |     |                        |                         |
| 2     | V\$OCT1_06 | 9       | 3930 | (+) | CWNAWTKWSATRYN         | GTATTATTGATTCT          |
| M0016 |            | 0.83437 |      |     |                        |                         |
| 2     | V\$OCT1_06 | 5       | 3967 | (+) | CWNAWTKWSATRYN         | AAACATATGATTTA          |
| M0016 |            | 0.81210 |      |     |                        |                         |
| 2     | V\$OCT1_06 | 9       | 3968 | (-) | CWNAWTKWSATRYN         | AACATATGATTAC           |
| M0019 |            | 0.83133 |      |     |                        |                         |
| 5     | V\$OCT1_Q6 | 2       | 3973 | (-) | NNNNATGCAAATNAN        | ATGATTTACAACCTG         |
| M0013 |            | 0.78500 |      |     |                        |                         |
| 5     | V\$OCT1_01 | 6       | 3989 | (-) | NNNNWTATGCAAATNTNNN    | TCTCAATTTACACACTGAG     |
| M0024 |            | 0.85202 |      |     |                        |                         |
| 8     | V\$OCT1_07 | 5       | 3993 | (-) | TNTATGNTAATT           | AATTTACACACT            |
| M0013 |            | 0.78586 |      |     |                        |                         |
| 6     | V\$OCT1_02 | 9       | 4000 | (-) | NNGAATATKCANNNN        | ACACTGAGTATTA           |
| M0013 |            | 0.77422 |      |     |                        |                         |
| 6     | V\$OCT1_02 | 8       | 4003 | (+) | NNGAATATKCANNNN        | CTGAGTATTAAATTA         |
| M0016 |            | 0.80351 |      |     |                        |                         |
| 2     | V\$OCT1_06 | 6       | 4005 | (+) | CWNAWTKWSATRYN         | GAGTATTAAATTAG          |
| M0016 |            | 0.80429 |      |     |                        |                         |
| 2     | V\$OCT1_06 | 7       | 4006 | (-) | CWNAWTKWSATRYN         | AGTATTAAATTAGA          |
| M0016 |            | 0.89414 |      |     |                        |                         |
| 2     | V\$OCT1_06 | 1       | 4010 | (+) | CWNAWTKWSATRYN         | TTAAATTAGATACT          |
| M0016 |            | 0.80859 |      |     |                        |                         |
| 2     | V\$OCT1_06 | 4       | 4011 | (-) | CWNAWTKWSATRYN         | TAAATTAGATACTC          |
| M0013 |            | 0.79715 |      |     | NNNNNNNWATGCAAATNNNWNN |                         |
| 8     | V\$OCT1_04 | 6       | 4075 | (-) | W                      | AGTTCATTTTTTAATGTTTACAG |
| M0016 |            |         |      |     |                        |                         |
| 2     | V\$OCT1_06 | 0.9375  | 4079 | (+) | CWNAWTKWSATRYN         | CATTTTTTAATGTT          |
| M0013 |            | 0.78251 |      |     | NNNNNNNWATGCAAATNNNWNN |                         |
| 8     | V\$OCT1_04 | 8       | 4080 | (+) | W                      | ATTTTTTAATGTTTACAGAATGA |
| M0013 |            | 0.84393 |      |     |                        |                         |
| 7     | V\$OCT1_03 | 5       | 4086 | (-) | NNNRTAATNANNN          | TAATGTTTACAGA           |
| M0013 |            | 0.85420 |      |     |                        |                         |
| 7     | V\$OCT1_03 | 8       | 4127 | (-) | NNNRTAATNANNN          | CTTCTTTACCCC            |
| M0013 |            | 0.78063 |      |     | NNNNNNNWATGCAAATNNNWNN | AGTAGCTATGATAAA-        |
| 8     | V\$OCT1_04 | 6       | 4156 | (+) | W                      | TACTGAA                 |
| M0024 |            | 0.79054 |      |     |                        |                         |
| 8     | V\$OCT1_07 | 5       | 4161 | (+) | TNTATGNTAATT           | GCTATGATAAAT            |
| M0013 |            | 0.82999 |      |     |                        |                         |
| 6     | V\$OCT1_02 | 5       | 4171 | (-) | NNGAATATKCANNNN        | ATACTGAATATCTTC         |
| M0013 |            | 0.81911 |      |     | NNNNNNNWATGCAAATNNNWNN |                         |
| 8     | V\$OCT1_04 | 3       | 4182 | (-) | W                      | CTTCTTCATTTC AATTTTCATT |
| M0016 |            | 0.84726 |      |     |                        |                         |
| 2     | V\$OCT1_06 | 6       | 4185 | (+) | CWNAWTKWSATRYN         | CTTCATTTC AATTT         |
| M0016 |            | 0.86835 |      |     |                        |                         |
| 2     | V\$OCT1_06 | 9       | 4186 | (-) | CWNAWTKWSATRYN         | TTCATTTC AATTTT         |
| M0013 |            | 0.86365 |      |     | NNNNNNNWATGCAAATNNNWNN |                         |
| 8     | V\$OCT1_04 | 5       | 4188 | (-) | W                      | CATTTC AATTTTCATTGTATAC |
| M0013 |            |         |      |     |                        |                         |
| 5     | V\$OCT1_01 | 0.781   | 4190 | (-) | NNNNWTATGCAAATNTNNN    | TTTCAATTTTCATTGTAT      |
| M0013 |            | 0.77070 |      |     |                        |                         |
| 6     | V\$OCT1_02 | 9       | 4191 | (+) | NNGAATATKCANNNN        | TTCAATTTTCATTG          |
| M0019 |            |         |      |     |                        |                         |
| 5     | V\$OCT1_Q6 | 0.7994  | 4192 | (-) | NNNNATGCAAATNAN        | TCAATTTTCATTGT          |
| M0013 |            | 0.83626 |      |     | NNNNNNNWATGCAAATNNNWNN |                         |
| 8     | V\$OCT1_04 | 1       | 4194 | (-) | W                      | AATTTTCATTGTATACCTTCAT  |
| M0024 |            | 0.79393 |      |     |                        |                         |
| 8     | V\$OCT1_07 | 7       | 4194 | (-) | TNTATGNTAATT           | AATTTTCATTG             |
| M0013 |            | 0.76535 |      |     |                        |                         |
| 5     | V\$OCT1_01 | 7       | 4196 | (-) | NNNNWTATGCAAATNTNNN    | TTTTCATTTGTATACCTTC     |

|       |            |         |      |     |                         |                         |
|-------|------------|---------|------|-----|-------------------------|-------------------------|
| M0019 |            | 0.85889 |      |     |                         |                         |
| 5     | V\$OCT1_Q6 | 7       | 4198 | (-) | NNNNATGCAAATNAN         | TTCATTGTATACCT          |
| M0016 |            | 0.83437 |      |     |                         |                         |
| 2     | V\$OCT1_06 | 5       | 4211 | (+) | CWNAWTKWSATRYN          | CTTCATTTC AATTG         |
| M0013 |            | 0.78774 |      |     | NNNNNNNNWATGCAAATNNNWNN | TCAATTGTATCCAGA-        |
| 8     | V\$OCT1_04 | 6       | 4218 | (+) | W                       | TACTCAGA                |
| M0016 |            |         |      |     |                         |                         |
| 2     | V\$OCT1_06 | 0.81875 | 4223 | (-) | CWNAWTKWSATRYN          | TGTATCCAGATACT          |
| M0013 |            | 0.87633 |      |     |                         |                         |
| 7     | V\$OCT1_03 | 3       | 4242 | (-) | NNNRTAATNANNN           | AGTTGATTACCCT           |
| M0013 |            | 0.89766 |      |     |                         |                         |
| 7     | V\$OCT1_03 | 9       | 4267 | (-) | NNNRTAATNANNN           | TTTTCATTACATT           |
| M0016 |            |         |      |     |                         |                         |
| 2     | V\$OCT1_06 | 0.85    | 4268 | (+) | CWNAWTKWSATRYN          | TTTCATTACATTCC          |
| M0016 |            | 0.83476 |      |     |                         |                         |
| 2     | V\$OCT1_06 | 6       | 4269 | (-) | CWNAWTKWSATRYN          | TTCATTACATTCT           |
| M0013 |            |         |      |     |                         |                         |
| 7     | V\$OCT1_03 | 0.84354 | 4304 | (+) | NNNRTAATNANNN           | TTGATAAGTATGA           |
| M0016 |            | 0.82109 |      |     |                         |                         |
| 2     | V\$OCT1_06 | 4       | 4310 | (-) | CWNAWTKWSATRYN          | AGTATGAACTGACT          |
| M0013 |            | 0.87001 |      |     |                         |                         |
| 7     | V\$OCT1_03 | 2       | 4336 | (+) | NNNRTAATNANNN           | CTGGTAAAGAAGG           |
| M0016 |            | 0.80039 |      |     |                         |                         |
| 2     | V\$OCT1_06 | 1       | 4362 | (+) | CWNAWTKWSATRYN          | GTCTCTTTCAGATT          |
| M0016 |            | 0.83984 |      |     |                         |                         |
| 2     | V\$OCT1_06 | 4       | 4364 | (+) | CWNAWTKWSATRYN          | CTCTTTCAGATTTT          |
| M0013 |            | 0.79485 |      |     | NNNNNNNNWATGCAAATNNNWNN | TTTCAGATTTTAAAA-        |
| 8     | V\$OCT1_04 | 6       | 4367 | (+) | W                       | TAAATCA                 |
| M0016 |            | 0.85273 |      |     |                         |                         |
| 2     | V\$OCT1_06 | 4       | 4370 | (+) | CWNAWTKWSATRYN          | CAGATTTTAAAATA          |
| M0016 |            | 0.80585 |      |     |                         |                         |
| 2     | V\$OCT1_06 | 9       | 4377 | (-) | CWNAWTKWSATRYN          | TAAAAATAAAATCAT         |
| M0016 |            | 0.80585 |      |     |                         |                         |
| 2     | V\$OCT1_06 | 9       | 4383 | (-) | CWNAWTKWSATRYN          | AAAATCATAAACT           |
| M0016 |            | 0.85507 |      |     |                         |                         |
| 2     | V\$OCT1_06 | 8       | 4396 | (-) | CWNAWTKWSATRYN          | TGAAACTAATTATC          |
| M0013 |            | 0.91228 |      |     |                         |                         |
| 7     | V\$OCT1_03 | 8       | 4399 | (-) | NNNRTAATNANNN           | AACTAATTATCTC           |
| M0013 |            | 0.84546 |      |     | NNNNNNNNWATGCAAATNNNWNN |                         |
| 8     | V\$OCT1_04 | 2       | 4408 | (-) | W                       | TCTCTTATTTTACCTAAGAAATA |
| M0016 |            | 0.83945 |      |     |                         |                         |
| 2     | V\$OCT1_06 | 3       | 4427 | (+) | CWNAWTKWSATRYN          | AATATTTTGGTTTA          |
| M0013 |            | 0.81116 |      |     | NNNNNNNNWATGCAAATNNNWNN |                         |
| 8     | V\$OCT1_04 | 7       | 4429 | (-) | W                       | TATTTTGGTTTACCTAAATAAAT |
| M0013 |            | 0.80280 |      |     | NNNNNNNNWATGCAAATNNNWNN | TTTGGTTTACCTAAA-        |
| 8     | V\$OCT1_04 | 2       | 4432 | (+) | W                       | TAAATGGA                |
| M0013 |            | 0.78042 |      |     | NNNNNNNNWATGCAAATNNNWNN | CTAAATAAATGGAGAATTT-    |
| 8     | V\$OCT1_04 | 7       | 4442 | (+) | W                       | GTGT                    |
| M0013 |            | 0.81367 |      |     | NNNNNNNNWATGCAAATNNNWNN | GAATTT-                 |
| 8     | V\$OCT1_04 | 6       | 4455 | (+) | W                       | GTGTTCAAATGGAAAAA       |
| M0013 |            | 0.82831 |      |     | NNNNNNNNWATGCAAATNNNWNN | GTGTTCAAATGGAAAAACATTC  |
| 8     | V\$OCT1_04 | 5       | 4461 | (+) | W                       | T                       |
| M0016 |            | 0.83203 |      |     |                         |                         |
| 2     | V\$OCT1_06 | 1       | 4490 | (+) | CWNAWTKWSATRYN          | CTGACTGTGTTTTT          |
| M0016 |            |         |      |     |                         |                         |
| 2     | V\$OCT1_06 | 0.925   | 4517 | (+) | CWNAWTKWSATRYN          | CACAATTTAATTCC          |
| M0016 |            | 0.82187 |      |     |                         |                         |
| 2     | V\$OCT1_06 | 5       | 4518 | (-) | CWNAWTKWSATRYN          | ACAATTTAATTCTT          |
| M0013 |            | 0.79297 |      |     | NNNNNNNNWATGCAAATNNNWNN | AG-                     |
| 8     | V\$OCT1_04 | 4       | 4538 | (+) | W                       | TCCTCAATGAAAATTTACTCA   |
| M0013 |            | 0.73674 |      |     |                         |                         |
| 5     | V\$OCT1_01 | 2       | 4540 | (+) | NNNNWTATGCAAATNTNNN     | TCCTCAATGAAAATTTACT     |
| M0016 |            | 0.84765 |      |     |                         |                         |
| 2     | V\$OCT1_06 | 6       | 4542 | (+) | CWNAWTKWSATRYN          | CTCAATGAAAATTT          |
| M0013 |            | 0.77964 |      |     |                         |                         |
| 6     | V\$OCT1_02 | 3       | 4543 | (-) | NNGAATATKCANNNN         | TCAATGAAAATTTAC         |

|       |            |         |      |     |                        |                         |
|-------|------------|---------|------|-----|------------------------|-------------------------|
| M0016 |            | 0.80429 |      |     |                        |                         |
| 2     | V\$OCT1_06 | 7       | 4543 | (-) | CWNAWTKWSATRYN         | TCAATGAAAATTTA          |
| M0024 |            | 0.84354 |      |     |                        |                         |
| 8     | V\$OCT1_07 | 5       | 4543 | (+) | TNTATGNTAATT           | TCAATGAAAATT            |
| M0013 |            | 0.81591 |      |     |                        |                         |
| 6     | V\$OCT1_02 | 8       | 4546 | (+) | NNGAATATKCANNNN        | ATGAAAATTTACTCA         |
| M0016 |            |         |      |     |                        |                         |
| 2     | V\$OCT1_06 | 0.85    | 4604 | (-) | CWNAWTKWSATRYN         | CAAATGTATTTTTC          |
| M0013 |            | 0.81304 |      |     | NNNNNNNWATGCAAATNNNWNN |                         |
| 8     | V\$OCT1_04 | 9       | 4609 | (+) | W                      | GTATTTTCTGGAAAAATCAACT  |
| M0013 |            | 0.73502 |      |     |                        |                         |
| 5     | V\$OCT1_01 | 5       | 4611 | (+) | NNNNWTATGCAAATNTNNN    | ATTTTCTGGAAAAATCAA      |
| M0013 |            |         |      |     | NNNNNNNWATGCAAATNNNWNN |                         |
| 8     | V\$OCT1_04 | 0.80343 | 4633 | (-) | W                      | AATTTCTATTTACAAACATTTTT |
| M0024 |            | 0.81619 |      |     |                        |                         |
| 8     | V\$OCT1_07 | 7       | 4633 | (-) | TNTATGNTAATT           | AATTTCTATTTA            |
| M0013 |            | 0.74151 |      |     |                        |                         |
| 5     | V\$OCT1_01 | 1       | 4635 | (-) | NNNNWTATGCAAATNTNNN    | TTTCTATTTACAAACATTT     |
| M0013 |            |         |      |     |                        |                         |
| 7     | V\$OCT1_03 | 0.88226 | 4636 | (-) | NNNRTAATNANNN          | TTCTATTTACAAA           |
| M0013 |            | 0.80949 |      |     | NNNNNNNWATGCAAATNNNWNN |                         |
| 8     | V\$OCT1_04 | 4       | 4637 | (-) | W                      | TCTATTTACAAACATTTTTTCAC |
| M0016 |            | 0.83437 |      |     |                        |                         |
| 2     | V\$OCT1_06 | 5       | 4649 | (+) | CWNAWTKWSATRYN         | CATTTTTTCACTTG          |
| M0013 |            | 0.78126 |      |     | NNNNNNNWATGCAAATNNNWNN |                         |
| 8     | V\$OCT1_04 | 3       | 4654 | (+) | W                      | TTTCACTGGTCAAATATTTTCA  |
| M0013 |            | 0.80531 |      |     | NNNNNNNWATGCAAATNNNWNN |                         |
| 8     | V\$OCT1_04 | 2       | 4663 | (-) | W                      | GTCAAATATTTTCATTTACTCAC |
| M0013 |            | 0.76497 |      |     |                        |                         |
| 5     | V\$OCT1_01 | 5       | 4665 | (-) | NNNNWTATGCAAATNTNNN    | CAAATATTTTCATTTACTC     |
| M0016 |            |         |      |     |                        |                         |
| 2     | V\$OCT1_06 | 0.9375  | 4667 | (+) | CWNAWTKWSATRYN         | AATATTTTCATTTA          |
| M0019 |            | 0.82232 |      |     |                        |                         |
| 5     | V\$OCT1_Q6 | 5       | 4667 | (-) | NNNNATGCAAATNAN        | AATATTTTCATTTAC         |
| M0024 |            | 0.81238 |      |     |                        |                         |
| 8     | V\$OCT1_07 | 1       | 4667 | (+) | TNTATGNTAATT           | AATATTTTCATT            |
| M0013 |            |         |      |     |                        |                         |
| 6     | V\$OCT1_02 | 0.83189 | 4696 | (-) | NNGAATATKCANNNN        | ACAAAGAATATTGAA         |
| M0013 |            | 0.83688 |      |     | NNNNNNNWATGCAAATNNNWNN | CAAAGAATATTGAAATTATA-   |
| 8     | V\$OCT1_04 | 8       | 4697 | (+) | W                      | TAT                     |
| M0013 |            | 0.76726 |      |     |                        |                         |
| 5     | V\$OCT1_01 | 4       | 4699 | (+) | NNNNWTATGCAAATNTNNN    | AAGAATATTGAAATTATAT     |
| M0013 |            | 0.85652 |      |     |                        |                         |
| 6     | V\$OCT1_02 | 4       | 4699 | (+) | NNGAATATKCANNNN        | AAGAATATTGAAATT         |
| M0019 |            | 0.81495 |      |     |                        |                         |
| 5     | V\$OCT1_Q6 | 6       | 4701 | (+) | NNNNATGCAAATNAN        | GAATATTGAAATTAT         |
| M0016 |            | 0.89739 |      |     |                        |                         |
| 1     | V\$OCT1_05 | 3       | 4702 | (-) | MKNATTTGCATAYY         | AATATTGAAATTAT          |
| M0016 |            | 0.84765 |      |     |                        |                         |
| 2     | V\$OCT1_06 | 6       | 4702 | (+) | CWNAWTKWSATRYN         | AATATTGAAATTAT          |
| M0016 |            | 0.85273 |      |     |                        |                         |
| 2     | V\$OCT1_06 | 4       | 4702 | (-) | CWNAWTKWSATRYN         | AATATTGAAATTAT          |
| M0024 |            | 0.88912 |      |     |                        |                         |
| 8     | V\$OCT1_07 | 4       | 4702 | (+) | TNTATGNTAATT           | AATATTGAAATT            |
| M0013 |            | 0.81702 |      |     | NNNNNNNWATGCAAATNNNWNN | AAATTATATATGCAAA-       |
| 8     | V\$OCT1_04 | 2       | 4709 | (-) | W                      | TATTA                   |
| M0013 |            | 0.92869 |      |     | NNNNNNNWATGCAAATNNNWNN | AATTATATATGCAAA-        |
| 8     | V\$OCT1_04 | 1       | 4710 | (+) | W                      | TATTA                   |
| M0013 |            |         |      |     |                        |                         |
| 5     | V\$OCT1_01 | 0.7562  | 4711 | (-) | NNNNWTATGCAAATNTNNN    | ATTATATATGCAAATATTA     |
| M0013 |            | 0.95345 |      |     |                        |                         |
| 5     | V\$OCT1_01 | 3       | 4712 | (+) | NNNNWTATGCAAATNTNNN    | TTATATATGCAAATATTA      |
| M0013 |            | 0.83784 |      |     |                        |                         |
| 6     | V\$OCT1_02 | 5       | 4712 | (+) | NNGAATATKCANNNN        | TTATATATGCAAATA         |
| M0019 |            | 0.88946 |      |     |                        |                         |
| 5     | V\$OCT1_Q6 | 5       | 4714 | (+) | NNNNATGCAAATNAN        | ATATATGCAAATATT         |

|       |            |         |      |     |                        |                          |
|-------|------------|---------|------|-----|------------------------|--------------------------|
| M0016 |            |         |      |     |                        |                          |
| 2     | V\$OCT1_06 | 0.9375  | 4715 | (-) | CWNAWTKWSATRYN         | TATATGCAAATATT           |
| M0024 |            | 0.87322 |      |     |                        |                          |
| 8     | V\$OCT1_07 | 5       | 4715 | (+) | TNTATGNTAATT           | TATATGCAAATA             |
| M0013 |            | 0.77585 |      |     |                        |                          |
| 6     | V\$OCT1_02 | 3       | 4717 | (-) | NNGAATATKCANNNN        | TATGCAAATATTAAA          |
| M0013 |            | 0.78628 |      |     | NNNNNNNWATGCAAATNNNWNN | ATGCAAATATTAAAAA-        |
| 8     | V\$OCT1_04 | 2       | 4718 | (+) | W                      | GCTGCTT                  |
| M0016 |            | 0.86992 |      |     |                        |                          |
| 2     | V\$OCT1_06 | 2       | 4723 | (-) | CWNAWTKWSATRYN         | AATATTAAAAAGCT           |
| M0016 |            | 0.91679 |      |     |                        |                          |
| 2     | V\$OCT1_06 | 7       | 4735 | (+) | CWNAWTKWSATRYN         | CTGCTTTAAATATT           |
| M0019 |            | 0.80731 |      |     |                        |                          |
| 5     | V\$OCT1_Q6 | 4       | 4735 | (-) | NNNNATGCAAATNAN        | CTGCTTTAAATATTA          |
| M0013 |            | 0.82214 |      |     |                        |                          |
| 6     | V\$OCT1_02 | 4       | 4737 | (-) | NNGAATATKCANNNN        | GCTTTAAATATTAAT          |
| M0013 |            | 0.78105 |      |     | NNNNNNNWATGCAAATNNNWNN |                          |
| 8     | V\$OCT1_04 | 4       | 4737 | (-) | W                      | GCTTTAAATATTAATCTGTACCT  |
| M0016 |            | 0.80468 |      |     |                        |                          |
| 2     | V\$OCT1_06 | 7       | 4741 | (-) | CWNAWTKWSATRYN         | TAAATATTAATCTG           |
| M0013 |            |         |      |     | NNNNNNNWATGCAAATNNNWNN |                          |
| 8     | V\$OCT1_04 | 0.80092 | 4757 | (-) | W                      | CCTATACATTGACTCTCTGTAA   |
| M0016 |            | 0.81328 |      |     |                        |                          |
| 2     | V\$OCT1_06 | 1       | 4760 | (+) | CWNAWTKWSATRYN         | ATACATTGACTCT            |
| M0016 |            | 0.80585 |      |     |                        |                          |
| 2     | V\$OCT1_06 | 9       | 4770 | (+) | CWNAWTKWSATRYN         | CTCTCTGTAAAACA           |
| M0013 |            | 0.81263 |      |     | NNNNNNNWATGCAAATNNNWNN |                          |
| 8     | V\$OCT1_04 | 1       | 4789 | (+) | W                      | GCTGTTTTGTGCATAATCTATGT  |
| M0013 |            | 0.78538 |      |     |                        |                          |
| 5     | V\$OCT1_01 | 7       | 4790 | (-) | NNNNWTATGCAAATNTNNN    | CTGTTTTGTGCATAATCTA      |
| M0013 |            | 0.88982 |      |     |                        |                          |
| 6     | V\$OCT1_02 | 1       | 4794 | (-) | NNGAATATKCANNNN        | TTTGTGCATAATCTA          |
| M0013 |            | 0.80217 |      |     | NNNNNNNWATGCAAATNNNWNN | CATAATCTATGTAACTTTACA    |
| 8     | V\$OCT1_04 | 5       | 4800 | (+) | W                      | A                        |
| M0013 |            | 0.74322 |      |     |                        |                          |
| 5     | V\$OCT1_01 | 8       | 4802 | (+) | NNNNWTATGCAAATNTNNN    | TAATCTATGTAACTTTAC       |
| M0024 |            | 0.87131 |      |     |                        |                          |
| 8     | V\$OCT1_07 | 7       | 4805 | (+) | TNTATGNTAATT           | TCTATGTAAACT             |
| M0013 |            | 0.79903 |      |     | NNNNNNNWATGCAAATNNNWNN |                          |
| 8     | V\$OCT1_04 | 8       | 4809 | (-) | W                      | TGTAAACTTTACAATTTCATTCTC |
| M0016 |            | 0.82890 |      |     |                        |                          |
| 2     | V\$OCT1_06 | 6       | 4812 | (+) | CWNAWTKWSATRYN         | AAACTTTACAATTT           |
| M0016 |            | 0.84726 |      |     |                        |                          |
| 2     | V\$OCT1_06 | 6       | 4813 | (-) | CWNAWTKWSATRYN         | AACTTTACAATTTCT          |
| M0013 |            | 0.85048 |      |     | NNNNNNNWATGCAAATNNNWNN |                          |
| 8     | V\$OCT1_04 | 1       | 4815 | (-) | W                      | CTTTACAATTTCATTCTCATTCTA |
| M0013 |            |         |      |     |                        |                          |
| 5     | V\$OCT1_01 | 0.79607 | 4817 | (-) | NNNNWTATGCAAATNTNNN    | TTACAATTTCATTCTCAT       |
| M0016 |            | 0.86933 |      |     |                        |                          |
| 1     | V\$OCT1_05 | 4       | 4819 | (+) | MKNATTTGCATAYY         | ACAATTTCATTCT            |
| M0019 |            |         |      |     |                        |                          |
| 5     | V\$OCT1_Q6 | 0.83488 | 4819 | (-) | NNNNATGCAAATNAN        | ACAATTTCATTCTCTC         |
| M0024 |            | 0.89866 |      |     |                        |                          |
| 8     | V\$OCT1_07 | 4       | 4821 | (-) | TNTATGNTAATT           | AATTTCATTCT              |
| M0013 |            | 0.96246 |      |     |                        |                          |
| 7     | V\$OCT1_03 | 5       | 4829 | (-) | NNNRATATNANNN          | TTCTCATTATGAT            |
| M0016 |            | 0.80195 |      |     |                        |                          |
| 2     | V\$OCT1_06 | 3       | 4831 | (+) | CWNAWTKWSATRYN         | CTCATTATGATGGA           |
| M0013 |            | 0.84393 |      |     |                        |                          |
| 7     | V\$OCT1_03 | 5       | 4883 | (+) | NNNRATATNANNN          | TCTGTAATTTCTAT           |
| M0016 |            | 0.80859 |      |     |                        |                          |
| 2     | V\$OCT1_06 | 4       | 4894 | (+) | CWNAWTKWSATRYN         | ATGACTGAATTGTC           |
| M0013 |            | 0.78938 |      |     |                        |                          |
| 6     | V\$OCT1_02 | 8       | 4895 | (-) | NNGAATATKCANNNN        | TGACTGAATTGTCAA          |
| M0016 |            | 0.83437 |      |     |                        |                          |
| 2     | V\$OCT1_06 | 5       | 4900 | (-) | CWNAWTKWSATRYN         | GAATTGTCAAATAG           |

|       |            |         |      |     |                        |                         |
|-------|------------|---------|------|-----|------------------------|-------------------------|
| M0013 |            | 0.80698 |      |     | NNNNNNNWATGCAAATNNNWNN | GAACACAAA-              |
| 8     | V\$OCT1_04 | 5       | 4913 | (+) | W                      | TAGAAATTTTATT           |
| M0013 |            |         |      |     |                        |                         |
| 5     | V\$OCT1_01 | 0.7314  | 4915 | (+) | NNNNWTATGCAAATNTNNN    | ACACAAATAGAAATTTTAT     |
| M0016 |            | 0.86054 |      |     |                        |                         |
| 2     | V\$OCT1_06 | 7       | 4918 | (+) | CWNAWTKWSATRYN         | CAAATAGAAATTTT          |
| M0016 |            | 0.83476 |      |     |                        |                         |
| 2     | V\$OCT1_06 | 6       | 4923 | (+) | CWNAWTKWSATRYN         | AGAAATTTTATTTC          |
| M0016 |            | 0.82656 |      |     |                        |                         |
| 2     | V\$OCT1_06 | 2       | 4924 | (+) | CWNAWTKWSATRYN         | GAAATTTTATTTCA          |
| M0013 |            | 0.78398 |      |     | NNNNNNNWATGCAAATNNNWNN | AAATTTTATTTCAAGA-       |
| 8     | V\$OCT1_04 | 2       | 4925 | (-) | W                      | CAAGTAT                 |
| M0013 |            | 0.83375 |      |     | NNNNNNNWATGCAAATNNNWNN | AGACAAGTATTTAAAAGATT-   |
| 8     | V\$OCT1_04 | 2       | 4938 | (+) | W                      | GA                      |
| M0016 |            | 0.89062 |      |     |                        |                         |
| 2     | V\$OCT1_06 | 5       | 4943 | (-) | CWNAWTKWSATRYN         | AGTATTTAAAAGAT          |
| M0013 |            | 0.83688 |      |     | NNNNNNNWATGCAAATNNNWNN |                         |
| 8     | V\$OCT1_04 | 8       | 4980 | (-) | W                      | TGAATGATTTTAAATAATCTT   |
| M0016 |            | 0.82656 |      |     |                        |                         |
| 2     | V\$OCT1_06 | 2       | 4984 | (+) | CWNAWTKWSATRYN         | TGATTTTAAATA            |
| M0016 |            | 0.86835 |      |     |                        |                         |
| 2     | V\$OCT1_06 | 9       | 5038 | (-) | CWNAWTKWSATRYN         | GGTAAGAAATTCTG          |
| M0013 |            | 0.79426 |      |     |                        |                         |
| 6     | V\$OCT1_02 | 1       | 5051 | (-) | NNGAATATKCANNNN        | GAACAGAATACTG           |
| M0013 |            | 0.79757 |      |     | NNNNNNNWATGCAAATNNNWNN | AGAATACTG-              |
| 8     | V\$OCT1_04 | 4       | 5055 | (+) | W                      | CAGAATTAACAA            |
| M0024 |            | 0.86220 |      |     |                        |                         |
| 8     | V\$OCT1_07 | 1       | 5069 | (-) | TNTATGNTAATT           | AATTAACAAAGC            |
| M0013 |            | 0.78911 |      |     |                        |                         |
| 6     | V\$OCT1_02 | 7       | 5074 | (-) | NNGAATATKCANNNN        | ACAAAGCATTTTATT         |
| M0016 |            | 0.82929 |      |     |                        |                         |
| 2     | V\$OCT1_06 | 7       | 5077 | (+) | CWNAWTKWSATRYN         | AAGCATTTTATTCT          |
| M0016 |            | 0.80703 |      |     |                        |                         |
| 2     | V\$OCT1_06 | 1       | 5078 | (-) | CWNAWTKWSATRYN         | AGCATTTTATTCTA          |
| M0016 |            | 0.80429 |      |     |                        |                         |
| 2     | V\$OCT1_06 | 7       | 5088 | (-) | CWNAWTKWSATRYN         | TCTATGTTATTAT           |
| M0024 |            | 0.89527 |      |     |                        |                         |
| 8     | V\$OCT1_07 | 2       | 5088 | (+) | TNTATGNTAATT           | TCTATGTTATTT            |
| M0013 |            |         |      |     | NNNNNNNWATGCAAATNNNWNN |                         |
| 8     | V\$OCT1_04 | 0.83166 | 5100 | (+) | W                      | ATGGTGTTATGCCAATTCTTTAT |
| M0013 |            |         |      |     |                        |                         |
| 5     | V\$OCT1_01 | 0.80351 | 5102 | (+) | NNNNWTATGCAAATNTNNN    | GGTGTTATGCCAATTCTTT     |
| M0019 |            | 0.79858 |      |     |                        |                         |
| 5     | V\$OCT1_Q6 | 1       | 5104 | (+) | NNNNATGCAAATNAN        | TGTTATGCCAATTCT         |
| M0016 |            | 0.89058 |      |     |                        |                         |
| 1     | V\$OCT1_05 | 6       | 5105 | (-) | MKNATTTGCATAYY         | GTTATGCCAATTCT          |
| M0016 |            | 0.82695 |      |     |                        |                         |
| 2     | V\$OCT1_06 | 3       | 5105 | (-) | CWNAWTKWSATRYN         | GTTATGCCAATTCT          |
| M0024 |            | 0.86983 |      |     |                        |                         |
| 8     | V\$OCT1_07 | 3       | 5105 | (+) | TNTATGNTAATT           | GTTATGCCAATT            |
| M0016 |            | 0.83437 |      |     |                        |                         |
| 2     | V\$OCT1_06 | 5       | 5117 | (+) | CWNAWTKWSATRYN         | CTTTATTGCCTTTT          |
| M0016 |            | 0.80039 |      |     |                        |                         |
| 2     | V\$OCT1_06 | 1       | 5137 | (-) | CWNAWTKWSATRYN         | AAAATCACTTAGAT          |
| M0016 |            | 0.82695 |      |     |                        |                         |
| 2     | V\$OCT1_06 | 3       | 5140 | (+) | CWNAWTKWSATRYN         | ATCACTTAGATTAT          |
| M0013 |            | 0.88542 |      |     |                        |                         |
| 7     | V\$OCT1_03 | 1       | 5147 | (-) | NNNRATAATNANNN         | AGATTATTATTAG           |
| M0013 |            | 0.73616 |      |     |                        |                         |
| 5     | V\$OCT1_01 | 9       | 5150 | (-) | NNNNWTATGCAAATNTNNN    | TTATTATTAGATTATTGAA     |
| M0013 |            | 0.84709 |      |     |                        |                         |
| 7     | V\$OCT1_03 | 6       | 5150 | (-) | NNNRATAATNANNN         | TTATTATTAGATT           |
| M0019 |            | 0.79530 |      |     |                        |                         |
| 5     | V\$OCT1_Q6 | 6       | 5177 | (+) | NNNNATGCAAATNAN        | AGAGATGAAGATAAC         |
| M0013 |            | 0.79109 |      |     | NNNNNNNWATGCAAATNNNWNN | ATGAAAGATAATAA-         |
| 8     | V\$OCT1_04 | 2       | 5214 | (-) | W                      | TAGTCAAAT               |

|       |            |         |      |     |                        |                          |  |
|-------|------------|---------|------|-----|------------------------|--------------------------|--|
| M0013 |            | 0.86764 |      |     |                        |                          |  |
| 7     | V\$OCT1_03 | 1       | 5218 | (+) | NNNRTAATNANNN          | AAGATAATAATAG            |  |
| M0013 |            | 0.82852 |      |     | NNNNNNNWATGCAAATNNNWNN | ATAATAA-                 |  |
| 8     | V\$OCT1_04 | 4       | 5221 | (+) | W                      | TAGTCAAATTTACTGG         |  |
| M0013 |            | 0.76325 |      |     |                        |                          |  |
| 5     | V\$OCT1_01 | 8       | 5223 | (+) | NNNNWTATGCAAATNTNNN    | AATAATAGTCAAATTTACT      |  |
| M0013 |            | 0.81700 |      |     |                        |                          |  |
| 6     | V\$OCT1_02 | 1       | 5223 | (+) | NNGAATATKCANNNN        | AATAATAGTCAAATT          |  |
| M0024 |            | 0.79520 |      |     |                        |                          |  |
| 8     | V\$OCT1_07 | 9       | 5226 | (+) | TNTATGNTAATT           | AATAGTCAAATT             |  |
| M0013 |            | 0.81158 |      |     | NNNNNNNWATGCAAATNNNWNN |                          |  |
| 8     | V\$OCT1_04 | 5       | 5245 | (+) | W                      | ACAAAATTTTTTAAATATTTTTA  |  |
| M0013 |            | 0.83061 |      |     | NNNNNNNWATGCAAATNNNWNN |                          |  |
| 8     | V\$OCT1_04 | 5       | 5246 | (-) | W                      | CAAAAATTTTTTAAATATTTTTAA |  |
| M0016 |            | 0.90351 |      |     |                        |                          |  |
| 2     | V\$OCT1_06 | 6       | 5250 | (+) | CWNAWTKWSATRYN         | ATTTTTTAAATATT           |  |
| M0013 |            | 0.83107 |      |     |                        |                          |  |
| 6     | V\$OCT1_02 | 7       | 5252 | (-) | NNGAATATKCANNNN        | TTTTTAAATATTTTT          |  |
| M0013 |            | 0.79548 |      |     | NNNNNNNWATGCAAATNNNWNN |                          |  |
| 8     | V\$OCT1_04 | 3       | 5253 | (+) | W                      | TTTTAAATATTTTTAAGCACACA  |  |
| M0013 |            | 0.85697 |      |     |                        |                          |  |
| 7     | V\$OCT1_03 | 4       | 5273 | (+) | NNNRTAATNANNN          | ACAGTAATGAACT            |  |
| M0013 |            |         |      |     |                        |                          |  |
| 7     | V\$OCT1_03 | 0.84275 | 5293 | (+) | NNNRTAATNANNN          | TAAATAAAGAAAA            |  |
| M0013 |            | 0.78105 |      |     | NNNNNNNWATGCAAATNNNWNN | GAAATAATATTGCAAAAAA-     |  |
| 8     | V\$OCT1_04 | 4       | 5327 | (+) | W                      | TATT                     |  |
| M0013 |            | 0.84399 |      |     | NNNNNNNWATGCAAATNNNWNN | AAATAATATTGCAAAAAA-      |  |
| 8     | V\$OCT1_04 | 8       | 5328 | (+) | W                      | TATTA                    |  |
| M0013 |            | 0.75333 |      |     |                        |                          |  |
| 5     | V\$OCT1_01 | 8       | 5357 | (-) | NNNNWTATGCAAATNTNNN    | TCACAAAAAGCATATTTAT      |  |
| M0013 |            | 0.87574 |      |     |                        |                          |  |
| 6     | V\$OCT1_02 | 4       | 5361 | (-) | NNGAATATKCANNNN        | AAAAAGCATATTTAT          |  |
| M0013 |            | 0.84163 |      |     |                        |                          |  |
| 6     | V\$OCT1_02 | 5       | 5364 | (+) | NNGAATATKCANNNN        | AAGCATATTTATTTT          |  |
| M0016 |            | 0.80429 |      |     |                        |                          |  |
| 2     | V\$OCT1_06 | 7       | 5367 | (+) | CWNAWTKWSATRYN         | CATATTTATTTTTT           |  |
| M0016 |            | 0.84218 |      |     |                        |                          |  |
| 2     | V\$OCT1_06 | 7       | 5367 | (-) | CWNAWTKWSATRYN         | CATATTTATTTTTT           |  |
| M0013 |            |         |      |     | NNNNNNNWATGCAAATNNNWNN |                          |  |
| 8     | V\$OCT1_04 | 0.78189 | 5369 | (-) | W                      | TATTTATTTTTTAATTGCAGCA   |  |
| M0016 |            | 0.82148 |      |     |                        |                          |  |
| 2     | V\$OCT1_06 | 4       | 5373 | (+) | CWNAWTKWSATRYN         | TATTTTTTAATTTG           |  |
| M0024 |            | 0.83167 |      |     |                        |                          |  |
| 8     | V\$OCT1_07 | 3       | 5373 | (+) | TNTATGNTAATT           | TATTTTTTAATT             |  |
| M0013 |            | 0.86344 |      |     | NNNNNNNWATGCAAATNNNWNN |                          |  |
| 8     | V\$OCT1_04 | 6       | 5375 | (-) | W                      | TTTTTAATTTGCAGCAGCAAAA   |  |
| M0013 |            | 0.74418 |      |     |                        |                          |  |
| 5     | V\$OCT1_01 | 2       | 5377 | (-) | NNNNWTATGCAAATNTNNN    | TTTTAATTTGCAGCAGCAA      |  |
| M0016 |            | 0.87343 |      |     |                        |                          |  |
| 2     | V\$OCT1_06 | 7       | 5393 | (+) | CWNAWTKWSATRYN         | CAAAATGTAAGATA           |  |
| M0016 |            | 0.89843 |      |     |                        |                          |  |
| 2     | V\$OCT1_06 | 7       | 5394 | (-) | CWNAWTKWSATRYN         | AAAATGTAAGATAC           |  |
| M0016 |            | 0.82109 |      |     |                        |                          |  |
| 2     | V\$OCT1_06 | 4       | 5404 | (+) | CWNAWTKWSATRYN         | ATACATTTCTTTTT           |  |
| M0016 |            | 0.86289 |      |     |                        |                          |  |
| 2     | V\$OCT1_06 | 1       | 5405 | (-) | CWNAWTKWSATRYN         | TACATTTCTTTTTT           |  |
| M0013 |            | 0.80886 |      |     | NNNNNNNWATGCAAATNNNWNN | TTGATGGAATGAAAAAAAAATTT  |  |
| 8     | V\$OCT1_04 | 7       | 5427 | (+) | W                      | T                        |  |
| M0016 |            | 0.83437 |      |     |                        |                          |  |
| 2     | V\$OCT1_06 | 5       | 5432 | (-) | CWNAWTKWSATRYN         | GGAATGAAAAAAAAA          |  |
| M0013 |            | 0.79339 |      |     | NNNNNNNWATGCAAATNNNWNN |                          |  |
| 8     | V\$OCT1_04 | 2       | 5440 | (-) | W                      | AAAAAATTTTATTATATTCATTT  |  |
| M0016 |            | 0.83945 |      |     |                        |                          |  |
| 2     | V\$OCT1_06 | 3       | 5442 | (+) | CWNAWTKWSATRYN         | AAAATTTTATTATA           |  |
| M0013 |            | 0.87040 |      |     |                        |                          |  |
| 7     | V\$OCT1_03 | 7       | 5445 | (-) | NNNRTAATNANNN          | ATTTTATTATATT            |  |



|       |            |         |      |     |                        |                         |
|-------|------------|---------|------|-----|------------------------|-------------------------|
| M0013 |            | 0.83918 |      |     | NNNNNNNWATGCAAATNNNWNN |                         |
| 8     | V\$OCT1_04 | 9       | 5446 | (-) | W                      | TTTTATTATATTCATTTTCTCCA |
| M0013 |            | 0.84028 |      |     |                        |                         |
| 6     | V\$OCT1_02 | 2       | 5449 | (+) | NNGAATATKCANNNN        | TATTATATTCATTTT         |
| M0016 |            | 0.83945 |      |     |                        |                         |
| 2     | V\$OCT1_06 | 3       | 5450 | (+) | CWNAWTKWSATRYN         | ATTATATTCATTTT          |
| M0013 |            | 0.77693 |      |     |                        |                         |
| 6     | V\$OCT1_02 | 6       | 5452 | (-) | NNGAATATKCANNNN        | TATATTCATTTTCTC         |
| M0016 |            | 0.81367 |      |     |                        |                         |
| 2     | V\$OCT1_06 | 2       | 5452 | (-) | CWNAWTKWSATRYN         | TATATTCATTTTCT          |
| M0016 |            | 0.86835 |      |     |                        |                         |
| 2     | V\$OCT1_06 | 9       | 5464 | (+) | CWNAWTKWSATRYN         | CTCCATTTTATGTT          |
| M0013 |            | 0.87712 |      |     |                        |                         |
| 7     | V\$OCT1_03 | 4       | 5492 | (-) | NNNRTAATNANNN          | TTATCTTTACTAT           |
| M0013 |            | 0.84337 |      |     | NNNNNNNWATGCAAATNNNWNN |                         |
| 8     | V\$OCT1_04 | 1       | 5497 | (-) | W                      | TTTACTATCTTGCATTATCAAAT |
| M0013 |            | 0.74990 |      |     |                        |                         |
| 5     | V\$OCT1_01 | 5       | 5499 | (-) | NNNNWTATGCAAATNTNNN    | TACTATCTTGCATTATCAA     |
| M0016 |            | 0.82695 |      |     |                        |                         |
| 2     | V\$OCT1_06 | 3       | 5501 | (+) | CWNAWTKWSATRYN         | CTATCTTGCATTAT          |
| M0013 |            | 0.81889 |      |     |                        |                         |
| 6     | V\$OCT1_02 | 6       | 5503 | (-) | NNGAATATKCANNNN        | ATCTTGCATTATCAA         |
| M0016 |            | 0.80820 |      |     |                        |                         |
| 2     | V\$OCT1_06 | 3       | 5520 | (-) | CWNAWTKWSATRYN         | GACAACTCAGAAAT          |
| M0016 |            | 0.80312 |      |     |                        |                         |
| 2     | V\$OCT1_06 | 5       | 5523 | (+) | CWNAWTKWSATRYN         | AACTCAGAAATGCA          |
| M0013 |            | 0.86171 |      |     |                        |                         |
| 7     | V\$OCT1_03 | 5       | 5552 | (+) | NNNRTAATNANNN          | TTGGTAAAGTGGA           |
| M0016 |            | 0.83984 |      |     |                        |                         |
| 2     | V\$OCT1_06 | 4       | 5580 | (+) | CWNAWTKWSATRYN         | CTGTCTTTGATCTA          |
| M0016 |            | 0.87773 |      |     |                        |                         |
| 2     | V\$OCT1_06 | 4       | 5589 | (+) | CWNAWTKWSATRYN         | ATCTATTTAATTCA          |
| M0019 |            | 0.79121 |      |     |                        |                         |
| 5     | V\$OCT1_Q6 | 2       | 5589 | (+) | NNNNATGCAAATNAN        | ATCTATTTAATTCAAG        |
| M0016 |            | 0.87382 |      |     |                        |                         |
| 2     | V\$OCT1_06 | 8       | 5590 | (-) | CWNAWTKWSATRYN         | TCTATTTAATTCAAG         |
| M0016 |            | 0.80820 |      |     |                        |                         |
| 2     | V\$OCT1_06 | 3       | 5614 | (-) | CWNAWTKWSATRYN         | AAAACGCCATATAC          |
| M0016 |            | 0.83398 |      |     |                        |                         |
| 2     | V\$OCT1_06 | 4       | 5624 | (+) | CWNAWTKWSATRYN         | ATACATTTCTTATA          |
| M0016 |            | 0.85507 |      |     |                        |                         |
| 2     | V\$OCT1_06 | 8       | 5625 | (-) | CWNAWTKWSATRYN         | TACATTTCTTATAG          |
| M0013 |            | 0.80635 |      |     | NNNNNNNWATGCAAATNNNWNN |                         |
| 8     | V\$OCT1_04 | 7       | 5626 | (-) | W                      | ACATTTCTTATAGATATCCATT  |
| M0013 |            | 0.78419 |      |     | NNNNNNNWATGCAAATNNNWNN |                         |
| 8     | V\$OCT1_04 | 1       | 5627 | (+) | W                      | CATTTCTTATAGATATCCATTCA |
| M0013 |            | 0.80928 |      |     | NNNNNNNWATGCAAATNNNWNN |                         |
| 8     | V\$OCT1_04 | 5       | 5632 | (-) | W                      | CTTATAGATATCCATTCATTCAT |
| M0013 |            | 0.80860 |      |     |                        |                         |
| 6     | V\$OCT1_02 | 9       | 5635 | (+) | NNGAATATKCANNNN        | ATAGATATCCATTCA         |
| M0016 |            | 0.85507 |      |     |                        |                         |
| 2     | V\$OCT1_06 | 8       | 5644 | (+) | CWNAWTKWSATRYN         | CATTCATTCATGTT          |
| M0024 |            | 0.79245 |      |     |                        |                         |
| 8     | V\$OCT1_07 | 3       | 5708 | (-) | TNTATGNTAATT           | AAGGAACATAAA            |
| M0016 |            | 0.86835 |      |     |                        |                         |
| 2     | V\$OCT1_06 | 9       | 5715 | (+) | CWNAWTKWSATRYN         | ATAAATGATATTTA          |
| M0013 |            | 0.86072 |      |     | NNNNNNNWATGCAAATNNNWNN |                         |
| 8     | V\$OCT1_04 | 8       | 5716 | (+) | W                      | TAAATGATATTTAAATTATTTTA |
| M0016 |            | 0.80429 |      |     |                        |                         |
| 2     | V\$OCT1_06 | 7       | 5716 | (-) | CWNAWTKWSATRYN         | TAAATGATATTTAA          |
| M0013 |            | 0.84671 |      |     | NNNNNNNWATGCAAATNNNWNN |                         |
| 8     | V\$OCT1_04 | 7       | 5717 | (-) | W                      | AAATGATATTTAAATTATTTTAA |
| M0013 |            | 0.73407 |      |     |                        |                         |
| 5     | V\$OCT1_01 | 1       | 5718 | (+) | NNNNWTATGCAAATNTNNN    | AATGATATTTAAATTATTT     |
| M0013 |            | 0.79453 |      |     |                        |                         |
| 6     | V\$OCT1_02 | 2       | 5718 | (+) | NNGAATATKCANNNN        | AATGATATTTAAATT         |

|       |            |         |      |     |                        |                         |
|-------|------------|---------|------|-----|------------------------|-------------------------|
| M0013 |            |         |      |     |                        |                         |
| 5     | V\$OCT1_01 | 0.7438  | 5719 | (-) | NNNNWTATGCAAATNTNNN    | ATGATATTTAAATTATTTT     |
| M0019 |            | 0.80431 |      |     |                        |                         |
| 5     | V\$OCT1_Q6 | 2       | 5720 | (+) | NNNNATGCAAATNAN        | TGATATTTAAATTAT         |
| M0016 |            | 0.84765 |      |     |                        |                         |
| 2     | V\$OCT1_06 | 6       | 5721 | (+) | CWNAWTKWSATRYN         | GATATTTAAATTAT          |
| M0016 |            | 0.91679 |      |     |                        |                         |
| 2     | V\$OCT1_06 | 7       | 5721 | (-) | CWNAWTKWSATRYN         | GATATTTAAATTAT          |
| M0024 |            | 0.87258 |      |     |                        |                         |
| 8     | V\$OCT1_07 | 9       | 5721 | (+) | TNTATGNTAATT           | GATATTTAAATT            |
| M0013 |            | 0.80614 |      |     | NNNNNNNWATGCAAATNNNWNN |                         |
| 8     | V\$OCT1_04 | 8       | 5725 | (+) | W                      | TTTAAATTATTTTAAAGTTATCT |
| M0013 |            | 0.78168 |      |     | NNNNNNNWATGCAAATNNNWNN |                         |
| 8     | V\$OCT1_04 | 1       | 5727 | (-) | W                      | TAAATTATTTTAAAGTTATCTCA |
| M0016 |            | 0.83945 |      |     |                        |                         |
| 2     | V\$OCT1_06 | 3       | 5730 | (+) | CWNAWTKWSATRYN         | ATTATTTTAAAGTT          |
| M0016 |            |         |      |     |                        |                         |
| 2     | V\$OCT1_06 | 0.81875 | 5732 | (-) | CWNAWTKWSATRYN         | TATTTTAAAGTTAT          |
| M0016 |            | 0.83437 |      |     |                        |                         |
| 2     | V\$OCT1_06 | 5       | 5741 | (-) | CWNAWTKWSATRYN         | GTTATCTCAAAATC          |
| M0016 |            | 0.83164 |      |     |                        |                         |
| 2     | V\$OCT1_06 | 1       | 5743 | (-) | CWNAWTKWSATRYN         | TATCTCAAAATCAT          |
| M0016 |            | 0.82539 |      |     |                        |                         |
| 2     | V\$OCT1_06 | 1       | 5748 | (+) | CWNAWTKWSATRYN         | CAAAATCATATTTT          |
| M0016 |            | 0.88671 |      |     |                        |                         |
| 2     | V\$OCT1_06 | 9       | 5749 | (-) | CWNAWTKWSATRYN         | AAAATCATATTTTG          |
| M0013 |            | 0.84116 |      |     |                        |                         |
| 7     | V\$OCT1_03 | 9       | 5783 | (+) | NNNRTAATNANNN          | TTGACAAAGAGAA           |
| M0013 |            | 0.80363 |      |     | NNNNNNNWATGCAAATNNNWNN | GGGAAAAATTTTCG-         |
| 8     | V\$OCT1_04 | 9       | 5803 | (-) | W                      | TATGAAAAT               |
| M0013 |            | 0.76592 |      |     |                        |                         |
| 5     | V\$OCT1_01 | 9       | 5805 | (-) | NNNNWTATGCAAATNTNNN    | GAAAAATTTTCGTATGAAA     |
| M0016 |            | 0.84726 |      |     |                        |                         |
| 2     | V\$OCT1_06 | 6       | 5807 | (+) | CWNAWTKWSATRYN         | AAAATTTTCGTATG          |
| M0013 |            | 0.85424 |      |     | NNNNNNNWATGCAAATNNNWNN | ATTTTCGTATGAAAATAC-     |
| 8     | V\$OCT1_04 | 5       | 5810 | (+) | W                      | GAAAA                   |
| M0013 |            | 0.82487 |      |     |                        |                         |
| 5     | V\$OCT1_01 | 6       | 5812 | (+) | NNNNWTATGCAAATNTNNN    | TTTCGTATGAAAATACGAA     |
| M0019 |            | 0.81113 |      |     |                        |                         |
| 5     | V\$OCT1_Q6 | 5       | 5814 | (+) | NNNNATGCAAATNAN        | TCGTATGAAAATACG         |
| M0016 |            | 0.87298 |      |     |                        |                         |
| 1     | V\$OCT1_05 | 7       | 5815 | (-) | MKNATTTGCATAYY         | CGTATGAAAATACG          |
| M0016 |            | 0.94296 |      |     |                        |                         |
| 2     | V\$OCT1_06 | 9       | 5815 | (-) | CWNAWTKWSATRYN         | CGTATGAAAATACG          |
| M0013 |            | 0.80112 |      |     | NNNNNNNWATGCAAATNNNWNN | ATGAAAATAC-             |
| 8     | V\$OCT1_04 | 9       | 5818 | (+) | W                      | GAAAAATTAAGGTG          |
| M0013 |            | 0.73960 |      |     |                        |                         |
| 5     | V\$OCT1_01 | 3       | 5820 | (+) | NNNNWTATGCAAATNTNNN    | GAAAAATACGAAAATTAAGG    |
| M0019 |            | 0.80076 |      |     |                        |                         |
| 5     | V\$OCT1_Q6 | 4       | 5822 | (+) | NNNNATGCAAATNAN        | AAATACGAAAATTAA         |
| M0013 |            | 0.78293 |      |     | NNNNNNNWATGCAAATNNNWNN | AAGGTGG-                |
| 8     | V\$OCT1_04 | 6       | 5835 | (+) | W                      | TATGTCAAAAAATGCT        |
| M0016 |            | 0.85507 |      |     |                        |                         |
| 2     | V\$OCT1_06 | 8       | 5840 | (-) | CWNAWTKWSATRYN         | GGTATGTCAAAAAA          |
| M0016 |            | 0.85234 |      |     |                        |                         |
| 2     | V\$OCT1_06 | 4       | 5842 | (-) | CWNAWTKWSATRYN         | TATGTCAAAAAATG          |
| M0013 |            |         |      |     | NNNNNNNWATGCAAATNNNWNN | TGTGCAGTATGAAAAACATTT-  |
| 8     | V\$OCT1_04 | 0.7844  | 5858 | (+) | W                      | TA                      |
| M0013 |            | 0.75333 |      |     |                        |                         |
| 5     | V\$OCT1_01 | 8       | 5860 | (+) | NNNNWTATGCAAATNTNNN    | TGCAGTATGAAAAACATTT     |
| M0016 |            | 0.84218 |      |     |                        |                         |
| 2     | V\$OCT1_06 | 7       | 5862 | (+) | CWNAWTKWSATRYN         | CAGTATGAAAAACA          |
| M0019 |            | 0.82232 |      |     |                        |                         |
| 5     | V\$OCT1_Q6 | 5       | 5862 | (+) | NNNNATGCAAATNAN        | CAGTATGAAAAACAT         |
| M0016 |            | 0.88195 |      |     |                        |                         |
| 1     | V\$OCT1_05 | 3       | 5863 | (-) | MKNATTTGCATAYY         | AGTATGAAAAACAT          |

|       |            |         |      |     |                        |                         |
|-------|------------|---------|------|-----|------------------------|-------------------------|
| M0016 |            | 0.90351 |      |     |                        |                         |
| 2     | V\$OCT1_06 | 6       | 5863 | (-) | CWNAWTKWSATRYN         | AGTATGAAAAACAT          |
| M0016 |            | 0.96601 |      |     |                        |                         |
| 2     | V\$OCT1_06 | 6       | 5886 | (+) | CWNAWTKWSATRYN         | AAAAATTTTCATGTA         |
| M0016 |            | 0.84218 |      |     |                        |                         |
| 2     | V\$OCT1_06 | 7       | 5887 | (-) | CWNAWTKWSATRYN         | AAAATTTTCATGTAA         |
| M0016 |            | 0.82148 |      |     |                        |                         |
| 2     | V\$OCT1_06 | 4       | 5917 | (-) | CWNAWTKWSATRYN         | GAACTTTCAAAATG          |
| M0013 |            | 0.78858 |      |     | NNNNNNNWATGCAAATNNNWNN |                         |
| 8     | V\$OCT1_04 | 2       | 5945 | (-) | W                      | CTGAGAATTCTGAATATTGATTT |
| M0013 |            | 0.75810 |      |     |                        |                         |
| 5     | V\$OCT1_01 | 8       | 5947 | (-) | NNNNWTATGCAAATNTNNN    | GAGAATTCTGAATATTGAT     |
| M0016 |            | 0.80039 |      |     |                        |                         |
| 2     | V\$OCT1_06 | 1       | 5949 | (+) | CWNAWTKWSATRYN         | GAATTCTGAATATT          |
| M0013 |            | 0.91905 |      |     |                        |                         |
| 6     | V\$OCT1_02 | 8       | 5951 | (-) | NNGAATATKCANNNN        | ATTCTGAATATTGAT         |
| M0013 |            | 0.82945 |      |     |                        |                         |
| 6     | V\$OCT1_02 | 3       | 5954 | (+) | NNGAATATKCANNNN        | CTGAATATTGATTTC         |
| M0013 |            | 0.80677 |      |     | NNNNNNNWATGCAAATNNNWNN | ACAAGGCATTAG-           |
| 8     | V\$OCT1_04 | 5       | 5997 | (-) | W                      | TATAAATGAAT             |
| M0013 |            | 0.80255 |      |     |                        |                         |
| 5     | V\$OCT1_01 | 6       | 5999 | (-) | NNNNWTATGCAAATNTNNN    | AAGGCATTAGTATAAATGA     |
| M0024 |            | 0.80029 |      |     |                        |                         |
| 8     | V\$OCT1_07 | 7       | 6003 | (-) | TNTATGNTAATT           | CATTAGTATAAA            |
| M0016 |            | 0.83437 |      |     |                        |                         |
| 2     | V\$OCT1_06 | 5       | 6011 | (-) | CWNAWTKWSATRYN         | TAAATGAATGAATG          |
| M0016 |            | 0.84218 |      |     |                        |                         |
| 2     | V\$OCT1_06 | 7       | 6031 | (-) | CWNAWTKWSATRYN         | AGAATGAATTAGTG          |
| M0016 |            | 0.83945 |      |     |                        |                         |
| 2     | V\$OCT1_06 | 3       | 6104 | (-) | CWNAWTKWSATRYN         | AGTACTACATGAAG          |
| M0013 |            | 0.85570 |      |     | NNNNNNNWATGCAAATNNNWNN | AA-                     |
| 8     | V\$OCT1_04 | 9       | 6133 | (-) | W                      | GAATGTTTTACATAGTCACAA   |
| M0013 |            | 0.73044 |      |     |                        |                         |
| 5     | V\$OCT1_01 | 6       | 6135 | (-) | NNNNWTATGCAAATNTNNN    | GAATGTTTTACATAGTCAC     |
| M0016 |            | 0.83437 |      |     |                        |                         |
| 2     | V\$OCT1_06 | 5       | 6137 | (+) | CWNAWTKWSATRYN         | ATGTTTTACATAGT          |
| M0019 |            | 0.85043 |      |     |                        |                         |
| 5     | V\$OCT1_Q6 | 7       | 6137 | (-) | NNNNATGCAAATNAN        | ATGTTTTACATAGTC         |
| M0016 |            | 0.80820 |      |     |                        |                         |
| 2     | V\$OCT1_06 | 3       | 6138 | (-) | CWNAWTKWSATRYN         | TGTTTTACATAGTC          |
| M0013 |            | 0.79047 |      |     |                        |                         |
| 6     | V\$OCT1_02 | 1       | 6139 | (-) | NNGAATATKCANNNN        | GTTTTACATAGTCAC         |
| M0016 |            | 0.80820 |      |     |                        |                         |
| 2     | V\$OCT1_06 | 3       | 6199 | (-) | CWNAWTKWSATRYN         | TGTTTTCAAAAGTT          |
| M0013 |            | 0.85262 |      |     |                        |                         |
| 7     | V\$OCT1_03 | 7       | 6222 | (-) | NNNRATATNANNN          | TTGTTATTAAC             |
| M0024 |            | 0.79732 |      |     |                        |                         |
| 8     | V\$OCT1_07 | 9       | 6231 | (-) | TNTATGNTAATT           | AAACAACATACA            |
| M0013 |            | 0.85236 |      |     | NNNNNNNWATGCAAATNNNWNN | ATA-                    |
| 8     | V\$OCT1_04 | 3       | 6238 | (+) | W                      | CAGGTATTTAAAAATTACAC    |
| M0013 |            | 0.78272 |      |     | NNNNNNNWATGCAAATNNNWNN | TAC-                    |
| 8     | V\$OCT1_04 | 7       | 6239 | (-) | W                      | AGGTATTTAAAAATTACAC     |
| M0016 |            | 0.82656 |      |     |                        |                         |
| 2     | V\$OCT1_06 | 2       | 6243 | (+) | CWNAWTKWSATRYN         | GGTATTTAAAAATT          |
| M0016 |            | 0.89843 |      |     |                        |                         |
| 2     | V\$OCT1_06 | 7       | 6243 | (-) | CWNAWTKWSATRYN         | GGTATTTAAAAATT          |
| M0013 |            | 0.82998 |      |     | NNNNNNNWATGCAAATNNNWNN |                         |
| 8     | V\$OCT1_04 | 7       | 6247 | (-) | W                      | TTTAAAAATTACACCTTCTTAA  |
| M0013 |            | 0.84551 |      |     |                        |                         |
| 7     | V\$OCT1_03 | 6       | 6263 | (+) | NNNRATATNANNN          | TTCTTAATTATTC           |
| M0013 |            | 0.88463 |      |     |                        |                         |
| 7     | V\$OCT1_03 | 1       | 6264 | (-) | NNNRATATNANNN          | TCTTAATTATICT           |
| M0013 |            | 0.79234 |      |     | NNNNNNNWATGCAAATNNNWNN |                         |
| 8     | V\$OCT1_04 | 6       | 6266 | (-) | W                      | TTAATTATTCTTCATACCTGACT |
| M0013 |            | 0.77012 |      |     |                        |                         |
| 5     | V\$OCT1_01 | 6       | 6283 | (+) | NNNNWTATGCAAATNTNNN    | CTGACTAAGTAAATTTCT      |

|       |            |         |      |     |                         |                         |
|-------|------------|---------|------|-----|-------------------------|-------------------------|
| M0024 |            | 0.85202 |      |     |                         |                         |
| 8     | V\$OCT1_07 | 5       | 6286 | (+) | TNTATGNTAATT            | ACTAAGTAAATT            |
| M0013 |            | 0.81348 |      |     |                         |                         |
| 6     | V\$OCT1_02 | 1       | 6288 | (-) | NNGAATATKCANNNN         | TAAGTAAATTTTCTT         |
| M0013 |            | 0.80635 |      |     | NNNNNNNNWATGCAAATNNNWNN |                         |
| 8     | V\$OCT1_04 | 7       | 6336 | (+) | W                       | GATTCTTTATTCTAAAACTATTA |
| M0013 |            | 0.76192 |      |     |                         |                         |
| 5     | V\$OCT1_01 | 3       | 6338 | (+) | NNNNWTATGCAAATNTNNN     | TTCTTTATTCTAAAACTAT     |
| M0016 |            |         |      |     |                         |                         |
| 2     | V\$OCT1_06 | 0.90625 | 6351 | (+) | CWNAWTKWSATRYN          | AACTATTAAATATA          |
| M0013 |            | 0.79527 |      |     | NNNNNNNNWATGCAAATNNNWNN | ATAATATAAGGGAAATAAA-    |
| 8     | V\$OCT1_04 | 4       | 6362 | (+) | W                       | GAAG                    |
| M0013 |            | 0.85578 |      |     |                         |                         |
| 7     | V\$OCT1_03 | 8       | 6373 | (+) | NNNRATAATNANNN          | GAAATAAAGAAGT           |
| M0013 |            |         |      |     | NNNNNNNNWATGCAAATNNNWNN | TAAAAAATATCCTAATCAAA-   |
| 8     | V\$OCT1_04 | 0.81765 | 6385 | (+) | W                       | TAT                     |
| M0013 |            | 0.78920 |      |     |                         |                         |
| 5     | V\$OCT1_01 | 3       | 6387 | (+) | NNNNWTATGCAAATNTNNN     | AAAAATATCCTAATCAAAT     |
| M0013 |            | 0.77693 |      |     |                         |                         |
| 6     | V\$OCT1_02 | 6       | 6387 | (+) | NNGAATATKCANNNN         | AAAAATATCCTAATC         |
| M0019 |            | 0.81222 |      |     |                         |                         |
| 5     | V\$OCT1_Q6 | 7       | 6389 | (+) | NNNNATGCAAATNAN         | AAATATCCTAATCAA         |
| M0013 |            | 0.89134 |      |     |                         |                         |
| 7     | V\$OCT1_03 | 7       | 6393 | (+) | NNNRATAATNANNN          | ATCCTAATCAAAT           |
| M0016 |            | 0.80468 |      |     |                         |                         |
| 2     | V\$OCT1_06 | 7       | 6395 | (+) | CWNAWTKWSATRYN          | CCTAATCAAATATC          |
| M0016 |            | 0.80078 |      |     |                         |                         |
| 2     | V\$OCT1_06 | 1       | 6396 | (-) | CWNAWTKWSATRYN          | CTAATCAAATATCC          |
| M0013 |            | 0.79074 |      |     |                         |                         |
| 6     | V\$OCT1_02 | 2       | 6397 | (-) | NNGAATATKCANNNN         | TAATCAAATATCCTT         |
| M0013 |            | 0.79234 |      |     | NNNNNNNNWATGCAAATNNNWNN | TCCTTTAAGTATCCTAATCAAA  |
| 8     | V\$OCT1_04 | 6       | 6407 | (-) | W                       | A                       |
| M0013 |            | 0.78649 |      |     | NNNNNNNNWATGCAAATNNNWNN | CTTTAAGTATCCTAATCAAAAT  |
| 8     | V\$OCT1_04 | 1       | 6409 | (+) | W                       | G                       |
| M0013 |            | 0.79053 |      |     |                         |                         |
| 5     | V\$OCT1_01 | 8       | 6411 | (+) | NNNNWTATGCAAATNTNNN     | TTAAGTATCCTAATCAAAA     |
| M0019 |            | 0.80458 |      |     |                         |                         |
| 5     | V\$OCT1_Q6 | 5       | 6413 | (+) | NNNNATGCAAATNAN         | AAGTATCCTAATCAA         |
| M0013 |            | 0.88463 |      |     |                         |                         |
| 7     | V\$OCT1_03 | 1       | 6417 | (+) | NNNRATAATNANNN          | ATCCTAATCAAAA           |
| M0016 |            | 0.82109 |      |     |                         |                         |
| 2     | V\$OCT1_06 | 4       | 6430 | (-) | CWNAWTKWSATRYN          | TGAATGAACAATTC          |
| M0016 |            | 0.81367 |      |     |                         |                         |
| 2     | V\$OCT1_06 | 2       | 6452 | (-) | CWNAWTKWSATRYN          | CAAAACTAAAAACAG         |
| M0016 |            | 0.82109 |      |     |                         |                         |
| 2     | V\$OCT1_06 | 4       | 6465 | (-) | CWNAWTKWSATRYN          | GATATCTCTAATTC          |
| M0013 |            | 0.82517 |      |     | NNNNNNNNWATGCAAATNNNWNN | TATCTCTAATTCAAA-        |
| 8     | V\$OCT1_04 | 8       | 6467 | (+) | W                       | GAAAAAAA                |
| M0013 |            | 0.79276 |      |     | NNNNNNNNWATGCAAATNNNWNN | AAAAAAA-                |
| 8     | V\$OCT1_04 | 5       | 6483 | (+) | W                       | GATGCAACATGTATGT        |
| M0013 |            |         |      |     |                         |                         |
| 6     | V\$OCT1_02 | 0.78641 | 6485 | (+) | NNGAATATKCANNNN         | AAAAAGATGCAACAT         |
| M0016 |            | 0.80429 |      |     |                         |                         |
| 2     | V\$OCT1_06 | 7       | 6510 | (+) | CWNAWTKWSATRYN          | CAAAATTGGCTGGA          |
| M0016 |            | 0.81406 |      |     |                         |                         |
| 2     | V\$OCT1_06 | 2       | 6552 | (-) | CWNAWTKWSATRYN          | TAAATTCTATGGAG          |
| M0016 |            | 0.85546 |      |     |                         |                         |
| 2     | V\$OCT1_06 | 9       | 6564 | (-) | CWNAWTKWSATRYN          | AGCATCTCACTGCT          |
| M0016 |            | 0.81367 |      |     |                         |                         |
| 2     | V\$OCT1_06 | 2       | 6613 | (-) | CWNAWTKWSATRYN          | CATACTACATGGAG          |
| M0013 |            | 0.77801 |      |     |                         |                         |
| 6     | V\$OCT1_02 | 8       | 6621 | (-) | NNGAATATKCANNNN         | ATGGAGAAAATTCAT         |
| M0013 |            | 0.89171 |      |     |                         |                         |
| 6     | V\$OCT1_02 | 6       | 6624 | (+) | NNGAATATKCANNNN         | GAGAAAATTCATTTT         |
| M0016 |            | 0.83437 |      |     |                         |                         |
| 2     | V\$OCT1_06 | 5       | 6625 | (+) | CWNAWTKWSATRYN          | AGAAAATTCATTTT          |

|       |            |         |      |     |                         |                         |
|-------|------------|---------|------|-----|-------------------------|-------------------------|
| M0016 |            | 0.85546 |      |     |                         |                         |
| 2     | V\$OCT1_06 | 9       | 6626 | (-) | CWNAWTKWSATRYN          | GAAAATTCATTTTG          |
| M0013 |            | 0.80991 |      |     | NNNNNNNNWATGCAAATNNNWNN |                         |
| 8     | V\$OCT1_04 | 2       | 6628 | (-) | W                       | AAATTCATTTTGCTTAAATATTT |
| M0013 |            | 0.77985 |      |     |                         |                         |
| 5     | V\$OCT1_01 | 5       | 6630 | (-) | NNNNWTATGCAAATNTNNN     | ATTCATTTTGCTTAAATAT     |
| M0013 |            | 0.80531 |      |     | NNNNNNNNWATGCAAATNNNWNN |                         |
| 8     | V\$OCT1_04 | 2       | 6632 | (-) | W                       | TCATTTTGCTTAAATATTTATAC |
| M0013 |            | 0.84055 |      |     |                         |                         |
| 6     | V\$OCT1_02 | 2       | 6638 | (-) | NNGAATATKCANNNN         | TGCTTAAATATTTAT         |
| M0013 |            | 0.82434 |      |     | NNNNNNNNWATGCAAATNNNWNN |                         |
| 8     | V\$OCT1_04 | 1       | 6638 | (-) | W                       | TGCTTAAATATTTATACATCATT |
| M0013 |            | 0.81023 |      |     |                         |                         |
| 6     | V\$OCT1_02 | 3       | 6641 | (+) | NNGAATATKCANNNN         | TTAAATATTTATACA         |
| M0013 |            | 0.83312 |      |     | NNNNNNNNWATGCAAATNNNWNN |                         |
| 8     | V\$OCT1_04 | 4       | 6642 | (-) | W                       | TAAATATTTATACATCATTGAAT |
| M0013 |            | 0.85341 |      |     |                         |                         |
| 7     | V\$OCT1_03 | 8       | 6643 | (-) | NNNRATAATNANNN          | AAATATTTATACA           |
| M0019 |            | 0.80840 |      |     |                         |                         |
| 5     | V\$OCT1_Q6 | 6       | 6667 | (-) | NNNNATGCAAATNAN         | ATGCTTTGTGTACTT         |
| M0013 |            | 0.78858 |      |     | NNNNNNNNWATGCAAATNNNWNN |                         |
| 8     | V\$OCT1_04 | 2       | 6678 | (-) | W                       | ACTTTTATTTATCACATAATCTT |
| M0013 |            | 0.85302 |      |     |                         |                         |
| 7     | V\$OCT1_03 | 3       | 6680 | (-) | NNNRATAATNANNN          | TTTTATTTATCAC           |
| M0016 |            | 0.84726 |      |     |                         |                         |
| 2     | V\$OCT1_06 | 6       | 6685 | (-) | CWNAWTKWSATRYN          | TTTATCACATAATC          |
| M0013 |            | 0.78532 |      |     |                         |                         |
| 6     | V\$OCT1_02 | 8       | 6686 | (-) | NNGAATATKCANNNN         | TTATCACATAATCTT         |
| M0013 |            | 0.86685 |      |     |                         |                         |
| 7     | V\$OCT1_03 | 1       | 6690 | (+) | NNNRATAATNANNN          | CACATAATCTTTA           |
| M0016 |            | 0.80859 |      |     |                         |                         |
| 2     | V\$OCT1_06 | 4       | 6700 | (-) | CWNAWTKWSATRYN          | TTAATCCAATGCTC          |
| M0013 |            | 0.79903 |      |     | NNNNNNNNWATGCAAATNNNWNN | AAGAAGTTAGGCTAG-        |
| 8     | V\$OCT1_04 | 8       | 6747 | (+) | W                       | TTAAAGGA                |
| M0025 |            | 0.78203 |      |     |                         |                         |
| 2     | V\$TATA_01 | 5       | 61   | (+) | STATAAAWRNNNNNNN        | GAATTTAAATAAACC         |
| M0025 |            | 0.83912 |      |     |                         |                         |
| 2     | V\$TATA_01 | 7       | 63   | (+) | STATAAAWRNNNNNNN        | ATTTAAATAAACCTG         |
| M0021 |            | 0.81462 |      |     |                         |                         |
| 6     | V\$TATA_C  | 9       | 92   | (+) | NCTATAAAAR              | ACCACAAAAT              |
| M0021 |            |         |      |     |                         |                         |
| 6     | V\$TATA_C  | 0.79456 | 122  | (+) | NCTATAAAAR              | GGTTTAAATA              |
| M0025 |            | 0.88277 |      |     |                         |                         |
| 2     | V\$TATA_01 | 1       | 123  | (+) | STATAAAWRNNNNNNN        | GTTTAAATAGCTTGG         |
| M0025 |            | 0.77366 |      |     |                         |                         |
| 2     | V\$TATA_01 | 2       | 209  | (+) | STATAAAWRNNNNNNN        | TTATGTATACATATA         |
| M0025 |            |         |      |     |                         |                         |
| 2     | V\$TATA_01 | 0.7729  | 213  | (+) | STATAAAWRNNNNNNN        | GTATACATATAACAA         |
| M0025 |            | 0.79218 |      |     |                         |                         |
| 2     | V\$TATA_01 | 5       | 215  | (+) | STATAAAWRNNNNNNN        | ATACATATAACAAAA         |
| M0021 |            | 0.75547 |      |     |                         |                         |
| 6     | V\$TATA_C  | 9       | 216  | (+) | NCTATAAAAR              | TACATATAAC              |
| M0025 |            | 0.80106 |      |     |                         |                         |
| 2     | V\$TATA_01 | 6       | 217  | (+) | STATAAAWRNNNNNNN        | ACATATAACAAAATT         |
| M0021 |            | 0.75125 |      |     |                         |                         |
| 6     | V\$TATA_C  | 4       | 218  | (+) | NCTATAAAAR              | CATATAACAA              |
| M0021 |            | 0.89384 |      |     |                         |                         |
| 6     | V\$TATA_C  | 7       | 333  | (+) | NCTATAAAAR              | AGCTTAAAAA              |
| M0021 |            | 0.81172 |      |     |                         |                         |
| 6     | V\$TATA_C  | 4       | 334  | (+) | NCTATAAAAR              | GCTTAAAAAT              |
| M0025 |            | 0.80131 |      |     |                         |                         |
| 2     | V\$TATA_01 | 9       | 334  | (+) | STATAAAWRNNNNNNN        | GCTTAAAAATATATT         |
| M0025 |            | 0.77594 |      |     |                         |                         |
| 2     | V\$TATA_01 | 5       | 340  | (+) | STATAAAWRNNNNNNN        | AAATATATTTGCAAA         |
| M0025 |            | 0.81806 |      |     |                         |                         |
| 2     | V\$TATA_01 | 6       | 342  | (+) | STATAAAWRNNNNNNN        | ATATATTTGCAAATG         |

|       |            |         |     |     |                 |                 |
|-------|------------|---------|-----|-----|-----------------|-----------------|
| M0021 |            | 0.82519 |     |     |                 |                 |
| 6     | V\$TATA_C  | 1       | 399 | (+) | NCTATAAAAR      | CTTTTATAAA      |
| M0025 |            | 0.82161 |     |     |                 |                 |
| 2     | V\$TATA_01 | 9       | 400 | (+) | STATAAAWRNNNNNN | TTTTATAAAGACCAA |
| M0021 |            | 0.79376 |     |     |                 |                 |
| 6     | V\$TATA_C  | 8       | 401 | (+) | NCTATAAAAR      | TTTATAAAGA      |
| M0025 |            | 0.87135 |     |     |                 |                 |
| 2     | V\$TATA_01 | 2       | 402 | (+) | STATAAAWRNNNNNN | TTATAAAGACCAAAT |
| M0025 |            | 0.79345 |     |     |                 |                 |
| 2     | V\$TATA_01 | 3       | 422 | (+) | STATAAAWRNNNNNN | ATTTTTAAACGAAAT |
| M0021 |            | 0.77950 |     |     |                 |                 |
| 6     | V\$TATA_C  | 9       | 423 | (+) | NCTATAAAAR      | TTTTTAAACG      |
| M0021 |            | 0.87483 |     |     |                 |                 |
| 6     | V\$TATA_C  | 5       | 514 | (+) | NCTATAAAAR      | TCTGTAAAAA      |
| M0025 |            |         |     |     |                 |                 |
| 2     | V\$TATA_01 | 0.78914 | 515 | (+) | STATAAAWRNNNNNN | CTGTAAAAAGTTGTC |
| M0021 |            | 0.75917 |     |     |                 |                 |
| 6     | V\$TATA_C  | 6       | 539 | (+) | NCTATAAAAR      | AATTTATAAT      |
| M0021 |            |         |     |     |                 |                 |
| 6     | V\$TATA_C  | 0.77634 | 541 | (+) | NCTATAAAAR      | TTTATAATAT      |
| M0021 |            | 0.76815 |     |     |                 |                 |
| 6     | V\$TATA_C  | 4       | 558 | (+) | NCTATAAAAR      | TTCATAGAAA      |
| M0021 |            | 0.81779 |     |     |                 |                 |
| 6     | V\$TATA_C  | 8       | 619 | (+) | NCTATAAAAR      | TTAATAAAAT      |
| M0021 |            |         |     |     |                 |                 |
| 6     | V\$TATA_C  | 0.81859 | 631 | (+) | NCTATAAAAR      | ATTTTATAAA      |
| M0025 |            | 0.83735 |     |     |                 |                 |
| 2     | V\$TATA_01 | 1       | 632 | (+) | STATAAAWRNNNNNN | TTTTATAAAGGAAAT |
| M0021 |            | 0.80512 |     |     |                 |                 |
| 6     | V\$TATA_C  | 3       | 633 | (+) | NCTATAAAAR      | TTTATAAAGG      |
| M0025 |            | 0.82517 |     |     |                 |                 |
| 2     | V\$TATA_01 | 1       | 634 | (+) | STATAAAWRNNNNNN | TTATAAAGGAAATGT |
| M0025 |            | 0.80766 |     |     |                 |                 |
| 2     | V\$TATA_01 | 3       | 664 | (+) | STATAAAWRNNNNNN | AGATATAAATGACTA |
| M0021 |            | 0.75125 |     |     |                 |                 |
| 6     | V\$TATA_C  | 4       | 665 | (+) | NCTATAAAAR      | GATATAAATG      |
| M0025 |            | 0.89748 |     |     |                 |                 |
| 2     | V\$TATA_01 | 8       | 666 | (+) | STATAAAWRNNNNNN | ATATAAATGACTACT |
| M0021 |            | 0.82519 |     |     |                 |                 |
| 6     | V\$TATA_C  | 1       | 679 | (+) | NCTATAAAAR      | CTTTTATAAA      |
| M0025 |            | 0.80512 |     |     |                 |                 |
| 2     | V\$TATA_01 | 6       | 680 | (+) | STATAAAWRNNNNNN | TTTTATAAAGATGAT |
| M0021 |            | 0.79376 |     |     |                 |                 |
| 6     | V\$TATA_C  | 8       | 681 | (+) | NCTATAAAAR      | TTTATAAAGA      |
| M0025 |            | 0.82161 |     |     |                 |                 |
| 2     | V\$TATA_01 | 9       | 682 | (+) | STATAAAWRNNNNNN | TTATAAAGATGATTA |
| M0025 |            | 0.77010 |     |     |                 |                 |
| 2     | V\$TATA_01 | 9       | 716 | (+) | STATAAAWRNNNNNN | ATACAAATATATGAA |
| M0025 |            | 0.80157 |     |     |                 |                 |
| 2     | V\$TATA_01 | 3       | 720 | (+) | STATAAAWRNNNNNN | AAATATATGAAAACA |
| M0025 |            | 0.83912 |     |     |                 |                 |
| 2     | V\$TATA_01 | 7       | 722 | (+) | STATAAAWRNNNNNN | ATATATGAAAACAGT |
| M0021 |            | 0.75178 |     |     |                 |                 |
| 6     | V\$TATA_C  | 2       | 723 | (+) | NCTATAAAAR      | TATATGAAAA      |
| M0025 |            | 0.81552 |     |     |                 |                 |
| 2     | V\$TATA_01 | 9       | 724 | (+) | STATAAAWRNNNNNN | ATATGAAAACAGTAG |
| M0021 |            | 0.86612 |     |     |                 |                 |
| 6     | V\$TATA_C  | 1       | 751 | (+) | NCTATAAAAR      | CCTATAAATA      |
| M0025 |            | 0.89139 |     |     |                 |                 |
| 2     | V\$TATA_01 | 8       | 752 | (+) | STATAAAWRNNNNNN | CTATAAATATGTCTT |
| M0021 |            | 0.76815 |     |     |                 |                 |
| 6     | V\$TATA_C  | 4       | 766 | (+) | NCTATAAAAR      | TTTTTAACAA      |
| M0025 |            | 0.77746 |     |     |                 |                 |
| 2     | V\$TATA_01 | 8       | 794 | (+) | STATAAAWRNNNNNN | GTTTGTAAGTGAAG  |
| M0021 |            | 0.92368 |     |     |                 |                 |
| 6     | V\$TATA_C  | 6       | 812 | (+) | NCTATAAAAR      | CCTATATAAA      |

|       |            |         |      |     |                  |                  |
|-------|------------|---------|------|-----|------------------|------------------|
| M0025 |            |         |      |     |                  |                  |
| 2     | V\$TATA_01 | 0.88404 | 813  | (+) | STATAAAWRNNNNNNN | CTATATAAAATAATC  |
| M0021 |            | 0.85635 |      |     |                  |                  |
| 6     | V\$TATA_C  | 1       | 814  | (+) | NCTATAAAAR       | TATATAAAAT       |
| M0025 |            | 0.85156 |      |     |                  |                  |
| 2     | V\$TATA_01 | 1       | 815  | (+) | STATAAAWRNNNNNNN | ATATAAAATAATCTG  |
| M0021 |            | 0.82017 |      |     |                  |                  |
| 6     | V\$TATA_C  | 4       | 849  | (+) | NCTATAAAAR       | GGTATAAAACA      |
| M0025 |            | 0.79370 |      |     |                  |                  |
| 2     | V\$TATA_01 | 7       | 850  | (+) | STATAAAWRNNNNNNN | GTATAAACAAATTTTC |
| M0021 |            | 0.78135 |      |     |                  |                  |
| 6     | V\$TATA_C  | 7       | 911  | (+) | NCTATAAAAR       | CACATATAAA       |
| M0025 |            | 0.84699 |      |     |                  |                  |
| 2     | V\$TATA_01 | 3       | 912  | (+) | STATAAAWRNNNNNNN | ACATATAAATGTATG  |
| M0021 |            | 0.76260 |      |     |                  |                  |
| 6     | V\$TATA_C  | 9       | 913  | (+) | NCTATAAAAR       | CATATAAATG       |
| M0025 |            | 0.86399 |      |     |                  |                  |
| 2     | V\$TATA_01 | 4       | 914  | (+) | STATAAAWRNNNNNNN | ATATAAATGTATGTA  |
| M0025 |            | 0.77036 |      |     |                  |                  |
| 2     | V\$TATA_01 | 3       | 942  | (+) | STATAAAWRNNNNNNN | CAATTTAATGGAECT  |
| M0025 |            | 0.80258 |      |     |                  |                  |
| 2     | V\$TATA_01 | 8       | 1023 | (+) | STATAAAWRNNNNNNN | GGATATATCAACCCA  |
| M0025 |            | 0.84344 |      |     |                  |                  |
| 2     | V\$TATA_01 | 1       | 1025 | (+) | STATAAAWRNNNNNNN | ATATATCAACCCAGC  |
| M0021 |            | 0.74914 |      |     |                  |                  |
| 6     | V\$TATA_C  | 2       | 1060 | (+) | NCTATAAAAR       | TCCTTTTAAA       |
| M0021 |            | 0.84050 |      |     |                  |                  |
| 6     | V\$TATA_C  | 7       | 1061 | (+) | NCTATAAAAR       | CCTTTTAAAA       |
| M0021 |            | 0.88962 |      |     |                  |                  |
| 6     | V\$TATA_C  | 2       | 1062 | (+) | NCTATAAAAR       | CTTTTAAAAA       |
| M0021 |            | 0.75072 |      |     |                  |                  |
| 6     | V\$TATA_C  | 6       | 1063 | (+) | NCTATAAAAR       | TTTTAAAAAT       |
| M0025 |            | 0.78406 |      |     |                  |                  |
| 2     | V\$TATA_01 | 5       | 1063 | (+) | STATAAAWRNNNNNNN | TTTTAAAAATTTAAT  |
| M0021 |            |         |      |     |                  |                  |
| 6     | V\$TATA_C  | 0.78479 | 1092 | (+) | NCTATAAAAR       | TCTACATAAT       |
| M0025 |            | 0.79396 |      |     |                  |                  |
| 2     | V\$TATA_01 | 1       | 1093 | (+) | STATAAAWRNNNNNNN | CTACATAATGCACAA  |
| M0021 |            | 0.75706 |      |     |                  |                  |
| 6     | V\$TATA_C  | 4       | 1122 | (+) | NCTATAAAAR       | ACTCTGAAAG       |
| M0025 |            | 0.79827 |      |     |                  |                  |
| 2     | V\$TATA_01 | 5       | 1143 | (+) | STATAAAWRNNNNNNN | GGATAAAGACATTTT  |
| M0021 |            | 0.88302 |      |     |                  |                  |
| 6     | V\$TATA_C  | 1       | 1153 | (+) | NCTATAAAAR       | ATTTTAAAAA       |
| M0021 |            | 0.76815 |      |     |                  |                  |
| 6     | V\$TATA_C  | 4       | 1154 | (+) | NCTATAAAAR       | TTTTAAAAAA       |
| M0025 |            | 0.79624 |      |     |                  |                  |
| 2     | V\$TATA_01 | 5       | 1154 | (+) | STATAAAWRNNNNNNN | TTTTAAAAAATTACA  |
| M0021 |            |         |      |     |                  |                  |
| 6     | V\$TATA_C  | 0.77634 | 1155 | (+) | NCTATAAAAR       | TTTAAAAAAT       |
| M0025 |            | 0.80233 |      |     |                  |                  |
| 2     | V\$TATA_01 | 4       | 1170 | (+) | STATAAAWRNNNNNNN | ATATTAAATGTAATT  |
| M0021 |            | 0.76102 |      |     |                  |                  |
| 6     | V\$TATA_C  | 5       | 1208 | (+) | NCTATAAAAR       | ATTTTAACAA       |
| M0021 |            | 0.75917 |      |     |                  |                  |
| 6     | V\$TATA_C  | 6       | 1241 | (+) | NCTATAAAAR       | TCTTTTTAAT       |
| M0021 |            | 0.86559 |      |     |                  |                  |
| 6     | V\$TATA_C  | 3       | 1263 | (+) | NCTATAAAAR       | ATTTTAAAAAT      |
| M0025 |            | 0.79751 |      |     |                  |                  |
| 2     | V\$TATA_01 | 3       | 1278 | (+) | STATAAAWRNNNNNNN | ATATTTAAATATTGA  |
| M0025 |            | 0.83278 |      |     |                  |                  |
| 2     | V\$TATA_01 | 4       | 1280 | (+) | STATAAAWRNNNNNNN | ATTTAAATATTGATG  |
| M0021 |            | 0.81647 |      |     |                  |                  |
| 6     | V\$TATA_C  | 7       | 1348 | (+) | NCTATAAAAR       | ACTTTAAAGT       |
| M0025 |            | 0.77213 |      |     |                  |                  |
| 2     | V\$TATA_01 | 9       | 1349 | (+) | STATAAAWRNNNNNNN | CTTTAAAGTGTAGTA  |

|       |            |         |      |     |                  |                  |
|-------|------------|---------|------|-----|------------------|------------------|
| M0025 |            | 0.77442 |      |     |                  |                  |
| 2     | V\$TATA_01 | 3       | 1382 | (+) | STATAAAWRNNNNNNN | TCTTATATAAGCACT  |
| M0021 |            |         |      |     |                  |                  |
| 6     | V\$TATA_C  | 0.86216 | 1383 | (+) | NCTATAAAAR       | CTTATATAAG       |
| M0025 |            | 0.86450 |      |     |                  |                  |
| 2     | V\$TATA_01 | 1       | 1384 | (+) | STATAAAWRNNNNNNN | TTATATAAGCACTAA  |
| M0025 |            | 0.81299 |      |     |                  |                  |
| 2     | V\$TATA_01 | 2       | 1420 | (+) | STATAAAWRNNNNNNN | ATATTTATATTGAAG  |
| M0025 |            | 0.80131 |      |     |                  |                  |
| 2     | V\$TATA_01 | 9       | 1422 | (+) | STATAAAWRNNNNNNN | ATTTATATTGAAGAG  |
| M0021 |            | 0.76049 |      |     |                  |                  |
| 6     | V\$TATA_C  | 6       | 1439 | (+) | NCTATAAAAR       | AAATTAAAAA       |
| M0021 |            | 0.87351 |      |     |                  |                  |
| 6     | V\$TATA_C  | 5       | 1454 | (+) | NCTATAAAAR       | TGAATAAAAA       |
| M0025 |            | 0.80537 |      |     |                  |                  |
| 2     | V\$TATA_01 | 9       | 1455 | (+) | STATAAAWRNNNNNNN | GAATAAAAAATATTAC |
| M0021 |            | 0.74174 |      |     |                  |                  |
| 6     | V\$TATA_C  | 8       | 1490 | (+) | NCTATAAAAR       | ATCATAATAT       |
| M0021 |            | 0.75653 |      |     |                  |                  |
| 6     | V\$TATA_C  | 6       | 1547 | (+) | NCTATAAAAR       | TTATTATAAG       |
| M0021 |            | 0.76023 |      |     |                  |                  |
| 6     | V\$TATA_C  | 2       | 1549 | (+) | NCTATAAAAR       | ATTATAAGAC       |
| M0025 |            | 0.78990 |      |     |                  |                  |
| 2     | V\$TATA_01 | 1       | 1550 | (+) | STATAAAWRNNNNNNN | TTATAAGACCTAACT  |
| M0021 |            | 0.80565 |      |     |                  |                  |
| 6     | V\$TATA_C  | 1       | 1593 | (+) | NCTATAAAAR       | ACCATGAAAC       |
| M0021 |            | 0.78901 |      |     |                  |                  |
| 6     | V\$TATA_C  | 5       | 1684 | (+) | NCTATAAAAR       | TGTTTAAAGT       |
| M0025 |            | 0.79396 |      |     |                  |                  |
| 2     | V\$TATA_01 | 1       | 1685 | (+) | STATAAAWRNNNNNNN | GTTTAAAGTCATCTC  |
| M0021 |            | 0.75442 |      |     |                  |                  |
| 6     | V\$TATA_C  | 3       | 1743 | (+) | NCTATAAAAR       | GTCATAAAGA       |
| M0021 |            | 0.86612 |      |     |                  |                  |
| 6     | V\$TATA_C  | 1       | 1772 | (+) | NCTATAAAAR       | GCTATTAAAG       |
| M0025 |            | 0.84115 |      |     |                  |                  |
| 2     | V\$TATA_01 | 7       | 1773 | (+) | STATAAAWRNNNNNNN | CTATTAAAGTGTGA   |
| M0021 |            | 0.75125 |      |     |                  |                  |
| 6     | V\$TATA_C  | 4       | 1786 | (+) | NCTATAAAAR       | GATATTAAAG       |
| M0025 |            | 0.83684 |      |     |                  |                  |
| 2     | V\$TATA_01 | 3       | 1787 | (+) | STATAAAWRNNNNNNN | ATATTAAAGCTATGG  |
| M0021 |            | 0.74570 |      |     |                  |                  |
| 6     | V\$TATA_C  | 9       | 1850 | (+) | NCTATAAAAR       | ACTCTAAATA       |
| M0021 |            | 0.80221 |      |     |                  |                  |
| 6     | V\$TATA_C  | 8       | 1852 | (+) | NCTATAAAAR       | TCTAAATAAA       |
| M0021 |            | 0.77581 |      |     |                  |                  |
| 6     | V\$TATA_C  | 2       | 1854 | (+) | NCTATAAAAR       | TAAATAAAAT       |
| M0025 |            | 0.82821 |      |     |                  |                  |
| 2     | V\$TATA_01 | 6       | 1874 | (+) | STATAAAWRNNNNNNN | AAATATAAACACCTC  |
| M0021 |            | 0.74465 |      |     |                  |                  |
| 6     | V\$TATA_C  | 3       | 1875 | (+) | NCTATAAAAR       | AATATAAACA       |
| M0025 |            | 0.81299 |      |     |                  |                  |
| 2     | V\$TATA_01 | 2       | 1876 | (+) | STATAAAWRNNNNNNN | ATATAAACACCTCAC  |
| M0021 |            | 0.77898 |      |     |                  |                  |
| 6     | V\$TATA_C  | 1       | 1889 | (+) | NCTATAAAAR       | ACAATTAAAA       |
| M0021 |            | 0.76709 |      |     |                  |                  |
| 6     | V\$TATA_C  | 8       | 1890 | (+) | NCTATAAAAR       | CAATTAAAAA       |
| M0021 |            | 0.88302 |      |     |                  |                  |
| 6     | V\$TATA_C  | 1       | 1899 | (+) | NCTATAAAAR       | ATTTTAAAAA       |
| M0025 |            | 0.78812 |      |     |                  |                  |
| 2     | V\$TATA_01 | 5       | 1899 | (+) | STATAAAWRNNNNNNN | ATTTTAAAAAAAAG   |
| M0021 |            | 0.76815 |      |     |                  |                  |
| 6     | V\$TATA_C  | 4       | 1900 | (+) | NCTATAAAAR       | TTTTAAAAAA       |
| M0025 |            | 0.83379 |      |     |                  |                  |
| 2     | V\$TATA_01 | 9       | 1900 | (+) | STATAAAWRNNNNNNN | TTTTAAAAAAAAGA   |
| M0021 |            | 0.79376 |      |     |                  |                  |
| 6     | V\$TATA_C  | 8       | 1901 | (+) | NCTATAAAAR       | TTTAAAAAAA       |



|       |            |         |      |     |                 |                  |
|-------|------------|---------|------|-----|-----------------|------------------|
| M0021 |            | 0.76340 |      |     |                 |                  |
| 6     | V\$TATA_C  | 1       | 1928 | (+) | NCTATAAAAR      | ACAATACAAT       |
| M0021 |            | 0.77898 |      |     |                 |                  |
| 6     | V\$TATA_C  | 1       | 1933 | (+) | NCTATAAAAR      | ACAATAAAGA       |
| M0025 |            | 0.81324 |      |     |                 |                  |
| 2     | V\$TATA_01 | 5       | 1934 | (+) | STATAAAWRNNNNNN | CAATAAAGAGCATCA  |
| M0021 |            |         |      |     |                 |                  |
| 6     | V\$TATA_C  | 0.80882 | 1942 | (+) | NCTATAAAAR      | AGCATCAAAAG      |
| M0021 |            |         |      |     |                 |                  |
| 6     | V\$TATA_C  | 0.74967 | 1986 | (+) | NCTATAAAAR      | GGCTTAACAT       |
| M0025 |            | 0.80208 |      |     |                 |                  |
| 2     | V\$TATA_01 | 1       | 2004 | (+) | STATAAAWRNNNNNN | ACATATATATATCCA  |
| M0025 |            | 0.89114 |      |     |                 |                  |
| 2     | V\$TATA_01 | 4       | 2006 | (+) | STATAAAWRNNNNNN | ATATATATATCCAAT  |
| M0025 |            |         |      |     |                 |                  |
| 2     | V\$TATA_01 | 0.83253 | 2008 | (+) | STATAAAWRNNNNNN | ATATATATCCAATAT  |
| M0021 |            | 0.81594 |      |     |                 |                  |
| 6     | V\$TATA_C  | 9       | 2172 | (+) | NCTATAAAAR      | TGCATGAAAG       |
| M0025 |            | 0.77848 |      |     |                 |                  |
| 2     | V\$TATA_01 | 3       | 2173 | (+) | STATAAAWRNNNNNN | GCATGAAAGTGAAAA  |
| M0021 |            | 0.83311 |      |     |                 |                  |
| 6     | V\$TATA_C  | 3       | 2316 | (+) | NCTATAAAAR      | ACTATTAAAC       |
| M0025 |            | 0.85333 |      |     |                 |                  |
| 2     | V\$TATA_01 | 7       | 2317 | (+) | STATAAAWRNNNNNN | CTATTAAACCCTATA  |
| M0025 |            | 0.77239 |      |     |                 |                  |
| 2     | V\$TATA_01 | 3       | 2461 | (+) | STATAAAWRNNNNNN | GTAGAAAGAAAAACT  |
| M0021 |            |         |      |     |                 |                  |
| 6     | V\$TATA_C  | 0.77766 | 2473 | (+) | NCTATAAAAR      | ACTAGATAAT       |
| M0021 |            | 0.74069 |      |     |                 |                  |
| 6     | V\$TATA_C  | 2       | 2502 | (+) | NCTATAAAAR      | TTCTCAAAAA       |
| M0021 |            | 0.75283 |      |     |                 |                  |
| 6     | V\$TATA_C  | 9       | 2503 | (+) | NCTATAAAAR      | TCTCAAAAAA       |
| M0025 |            | 0.82060 |      |     |                 |                  |
| 2     | V\$TATA_01 | 4       | 2522 | (+) | STATAAAWRNNNNNN | TTATTAATGTGAAAC  |
| M0021 |            | 0.81594 |      |     |                 |                  |
| 6     | V\$TATA_C  | 9       | 2692 | (+) | NCTATAAAAR      | TGCATGAAAG       |
| M0021 |            |         |      |     |                 |                  |
| 6     | V\$TATA_C  | 0.78479 | 2842 | (+) | NCTATAAAAR      | TCTAGATAAT       |
| M0025 |            | 0.78533 |      |     |                 |                  |
| 2     | V\$TATA_01 | 4       | 2851 | (+) | STATAAAWRNNNNNN | TGATAAATAAATAAA  |
| M0025 |            | 0.82872 |      |     |                 |                  |
| 2     | V\$TATA_01 | 4       | 2855 | (+) | STATAAAWRNNNNNN | AAATAAATAAATAGG  |
| M0025 |            | 0.84876 |      |     |                 |                  |
| 2     | V\$TATA_01 | 9       | 2859 | (+) | STATAAAWRNNNNNN | AAATAAATAGGAATC  |
| M0025 |            | 0.77772 |      |     |                 |                  |
| 2     | V\$TATA_01 | 1       | 2912 | (+) | STATAAAWRNNNNNN | GGATATTTGGACACT  |
| M0021 |            | 0.84209 |      |     |                 |                  |
| 6     | V\$TATA_C  | 1       | 2930 | (+) | NCTATAAAAR      | ACTATCAAAAT      |
| M0025 |            | 0.77163 |      |     |                 |                  |
| 2     | V\$TATA_01 | 2       | 2936 | (+) | STATAAAWRNNNNNN | AAATATAGATGAAAA  |
| M0025 |            | 0.77619 |      |     |                 |                  |
| 2     | V\$TATA_01 | 9       | 2938 | (+) | STATAAAWRNNNNNN | ATATAGATGAAAAAG  |
| M0021 |            | 0.75019 |      |     |                 |                  |
| 6     | V\$TATA_C  | 8       | 3001 | (+) | NCTATAAAAR      | TGTAAATAAT       |
| M0021 |            | 0.79746 |      |     |                 |                  |
| 6     | V\$TATA_C  | 5       | 3074 | (+) | NCTATAAAAR      | AGCATCAAAA       |
| M0021 |            | 0.75996 |      |     |                 |                  |
| 6     | V\$TATA_C  | 8       | 3075 | (+) | NCTATAAAAR      | GCATCAAAAG       |
| M0021 |            | 0.78188 |      |     |                 |                  |
| 6     | V\$TATA_C  | 5       | 3105 | (+) | NCTATAAAAR      | GTTACAAAAA       |
| M0025 |            | 0.78457 |      |     |                 |                  |
| 2     | V\$TATA_01 | 2       | 3106 | (+) | STATAAAWRNNNNNN | TTACAAAAAAAAGGAT |
| M0021 |            | 0.79033 |      |     |                 |                  |
| 6     | V\$TATA_C  | 5       | 3108 | (+) | NCTATAAAAR      | ACAAAAAAAG       |
| M0025 |            | 0.79497 |      |     |                 |                  |
| 2     | V\$TATA_01 | 6       | 3182 | (+) | STATAAAWRNNNNNN | AGATATAGATCCCCC  |

|       |            |         |      |     |                  |                  |
|-------|------------|---------|------|-----|------------------|------------------|
| M0025 |            | 0.77975 |      |     |                  |                  |
| 2     | V\$TATA_01 | 1       | 3184 | (+) | STATAAAWRNNNNNNN | ATATAGATCCCCCAG  |
| M0025 |            |         |      |     |                  |                  |
| 2     | V\$TATA_01 | 0.77087 | 3261 | (+) | STATAAAWRNNNNNNN | ACATAAATCTTG TTC |
| M0025 |            | 0.77163 |      |     |                  |                  |
| 2     | V\$TATA_01 | 2       | 3281 | (+) | STATAAAWRNNNNNNN | GTAAAAATGCAGATT  |
| M0021 |            | 0.83390 |      |     |                  |                  |
| 6     | V\$TATA_C  | 5       | 3306 | (+) | NCTATAAAAR       | TTTATATAAT       |
| M0025 |            | 0.80715 |      |     |                  |                  |
| 2     | V\$TATA_01 | 6       | 3307 | (+) | STATAAAWRNNNNNNN | TTATATAATTTAATT  |
| M0021 |            | 0.79508 |      |     |                  |                  |
| 6     | V\$TATA_C  | 8       | 3323 | (+) | NCTATAAAAR       | ATGATAAAAA       |
| M0025 |            | 0.78152 |      |     |                  |                  |
| 2     | V\$TATA_01 | 8       | 3324 | (+) | STATAAAWRNNNNNNN | TGATAAAAAATAAAA  |
| M0021 |            | 0.76868 |      |     |                  |                  |
| 6     | V\$TATA_C  | 2       | 3330 | (+) | NCTATAAAAR       | AAAATAAAAT       |
| M0025 |            | 0.80664 |      |     |                  |                  |
| 2     | V\$TATA_01 | 8       | 3331 | (+) | STATAAAWRNNNNNNN | AAATAAAATCCAGAC  |
| M0021 |            | 0.79482 |      |     |                  |                  |
| 6     | V\$TATA_C  | 4       | 3397 | (+) | NCTATAAAAR       | ATTCTAAAAA       |
| M0025 |            | 0.79091 |      |     |                  |                  |
| 2     | V\$TATA_01 | 6       | 3398 | (+) | STATAAAWRNNNNNNN | TTCTAAAAACAGAAG  |
| M0021 |            | 0.74465 |      |     |                  |                  |
| 6     | V\$TATA_C  | 3       | 3399 | (+) | NCTATAAAAR       | TCTAAAAACA       |
| M0021 |            | 0.74095 |      |     |                  |                  |
| 6     | V\$TATA_C  | 6       | 3483 | (+) | NCTATAAAAR       | GCTGTAAAAA       |
| M0021 |            | 0.75864 |      |     |                  |                  |
| 6     | V\$TATA_C  | 8       | 3484 | (+) | NCTATAAAAR       | CTGTAAAAAT       |
| M0021 |            | 0.74069 |      |     |                  |                  |
| 6     | V\$TATA_C  | 2       | 3500 | (+) | NCTATAAAAR       | TTCTTAAACA       |
| M0021 |            | 0.84209 |      |     |                  |                  |
| 6     | V\$TATA_C  | 1       | 3512 | (+) | NCTATAAAAR       | ACTATTAAAT       |
| M0025 |            | 0.80258 |      |     |                  |                  |
| 2     | V\$TATA_01 | 8       | 3513 | (+) | STATAAAWRNNNNNNN | CTATTAAATGTATAG  |
| M0021 |            | 0.74069 |      |     |                  |                  |
| 6     | V\$TATA_C  | 2       | 3578 | (+) | NCTATAAAAR       | GTTTTACAAT       |
| M0021 |            | 0.77950 |      |     |                  |                  |
| 6     | V\$TATA_C  | 9       | 3600 | (+) | NCTATAAAAR       | TTTTTAACAG       |
| M0025 |            | 0.78787 |      |     |                  |                  |
| 2     | V\$TATA_01 | 1       | 3699 | (+) | STATAAAWRNNNNNNN | TGATAAATTGCTAAT  |
| M0025 |            | 0.84344 |      |     |                  |                  |
| 2     | V\$TATA_01 | 1       | 3712 | (+) | STATAAAWRNNNNNNN | ATATATATATTGTAG  |
| M0025 |            | 0.83227 |      |     |                  |                  |
| 2     | V\$TATA_01 | 6       | 3714 | (+) | STATAAAWRNNNNNNN | ATATATATTGTAGTC  |
| M0025 |            | 0.77772 |      |     |                  |                  |
| 2     | V\$TATA_01 | 1       | 3854 | (+) | STATAAAWRNNNNNNN | ATATTTATGATTAAT  |
| M0021 |            | 0.83522 |      |     |                  |                  |
| 6     | V\$TATA_C  | 6       | 3864 | (+) | NCTATAAAAR       | TTAATAAAAA       |
| M0025 |            | 0.78025 |      |     |                  |                  |
| 2     | V\$TATA_01 | 9       | 3905 | (+) | STATAAAWRNNNNNNN | ATATGTATATGTGGT  |
| M0025 |            |         |      |     |                  |                  |
| 2     | V\$TATA_01 | 0.8102  | 3909 | (+) | STATAAAWRNNNNNNN | GTATATGTGGTCTAT  |
| M0021 |            | 0.80749 |      |     |                  |                  |
| 6     | V\$TATA_C  | 9       | 4006 | (+) | NCTATAAAAR       | AGTATTAAAT       |
| M0025 |            | 0.83735 |      |     |                  |                  |
| 2     | V\$TATA_01 | 1       | 4007 | (+) | STATAAAWRNNNNNNN | GTATTAAATTAGATA  |
| M0021 |            | 0.78082 |      |     |                  |                  |
| 6     | V\$TATA_C  | 9       | 4034 | (+) | NCTATAAAAR       | CTTTTACAAG       |
| M0025 |            | 0.80715 |      |     |                  |                  |
| 2     | V\$TATA_01 | 6       | 4165 | (+) | STATAAAWRNNNNNNN | TGATAAATACTGAAT  |
| M0021 |            | 0.86559 |      |     |                  |                  |
| 6     | V\$TATA_C  | 3       | 4373 | (+) | NCTATAAAAR       | ATTTTAAAT        |
| M0025 |            | 0.77188 |      |     |                  |                  |
| 2     | V\$TATA_01 | 5       | 4373 | (+) | STATAAAWRNNNNNNN | ATTTTAAAAATAAAAT |
| M0025 |            | 0.79040 |      |     |                  |                  |
| 2     | V\$TATA_01 | 9       | 4374 | (+) | STATAAAWRNNNNNNN | TTTTAAAAATAAAATC |

|       |            |         |      |     |                 |                 |
|-------|------------|---------|------|-----|-----------------|-----------------|
| M0021 |            | 0.76868 |      |     |                 |                 |
| 6     | V\$TATA_C  | 2       | 4378 | (+) | NCTATAAAAR      | AAAATAAAAT      |
| M0025 |            | 0.79091 |      |     |                 |                 |
| 2     | V\$TATA_01 | 6       | 4379 | (+) | STATAAAWRNNNNNN | AAATAAAATCATAAA |
| M0021 |            | 0.85476 |      |     |                 |                 |
| 6     | V\$TATA_C  | 6       | 4386 | (+) | NCTATAAAAR      | ATCATAAAAAC     |
| M0025 |            | 0.80842 |      |     |                 |                 |
| 2     | V\$TATA_01 | 4       | 4387 | (+) | STATAAAWRNNNNNN | TCATAAAACTGAAAC |
| M0021 |            |         |      |     |                 |                 |
| 6     | V\$TATA_C  | 0.80169 | 4441 | (+) | NCTATAAAAR      | CCTAAATAAA      |
| M0025 |            | 0.81984 |      |     |                 |                 |
| 2     | V\$TATA_01 | 3       | 4442 | (+) | STATAAAWRNNNNNN | CTAAATAAATGGAGA |
| M0025 |            | 0.83938 |      |     |                 |                 |
| 2     | V\$TATA_01 | 1       | 4444 | (+) | STATAAAWRNNNNNN | AAATAAATGGAGAAT |
| M0025 |            | 0.78381 |      |     |                 |                 |
| 2     | V\$TATA_01 | 1       | 4463 | (+) | STATAAAWRNNNNNN | GTTCAAATGGAAAAA |
| M0021 |            |         |      |     |                 |                 |
| 6     | V\$TATA_C  | 0.78611 | 4543 | (+) | NCTATAAAAR      | TCAATGAAAA      |
| M0021 |            | 0.75283 |      |     |                 |                 |
| 6     | V\$TATA_C  | 9       | 4616 | (+) | NCTATAAAAR      | TCTGGAAAAA      |
| M0025 |            | 0.87820 |      |     |                 |                 |
| 2     | V\$TATA_01 | 4       | 4712 | (+) | STATAAAWRNNNNNN | TTATATATGCAAATA |
| M0021 |            | 0.74465 |      |     |                 |                 |
| 6     | V\$TATA_C  | 3       | 4723 | (+) | NCTATAAAAR      | AATATTAAAA      |
| M0021 |            | 0.80248 |      |     |                 |                 |
| 6     | V\$TATA_C  | 2       | 4724 | (+) | NCTATAAAAR      | ATATTAAAAA      |
| M0025 |            | 0.84800 |      |     |                 |                 |
| 2     | V\$TATA_01 | 8       | 4724 | (+) | STATAAAWRNNNNNN | ATATTAAAAAGCTGC |
| M0021 |            | 0.76155 |      |     |                 |                 |
| 6     | V\$TATA_C  | 3       | 4736 | (+) | NCTATAAAAR      | TGCTTTAAAT      |
| M0021 |            | 0.82915 |      |     |                 |                 |
| 6     | V\$TATA_C  | 2       | 4737 | (+) | NCTATAAAAR      | GCTTTAAATA      |
| M0025 |            | 0.82923 |      |     |                 |                 |
| 2     | V\$TATA_01 | 1       | 4738 | (+) | STATAAAWRNNNNNN | CTTTAAATATTAATC |
| M0025 |            | 0.81172 |      |     |                 |                 |
| 2     | V\$TATA_01 | 3       | 4744 | (+) | STATAAAWRNNNNNN | ATATTAATCTGTACC |
| M0021 |            | 0.84842 |      |     |                 |                 |
| 6     | V\$TATA_C  | 9       | 4773 | (+) | NCTATAAAAR      | TCTGTAAAC       |
| M0021 |            | 0.80221 |      |     |                 |                 |
| 6     | V\$TATA_C  | 8       | 4805 | (+) | NCTATAAAAR      | TCTATGTAAA      |
| M0021 |            | 0.81832 |      |     |                 |                 |
| 6     | V\$TATA_C  | 6       | 4814 | (+) | NCTATAAAAR      | ACTTTACAAT      |
| M0021 |            | 0.76049 |      |     |                 |                 |
| 6     | V\$TATA_C  | 6       | 4943 | (+) | NCTATAAAAR      | AGTATTTAAA      |
| M0025 |            | 0.83075 |      |     |                 |                 |
| 2     | V\$TATA_01 | 4       | 4944 | (+) | STATAAAWRNNNNNN | GTATTTAAAAGATT  |
| M0021 |            | 0.85951 |      |     |                 |                 |
| 6     | V\$TATA_C  | 9       | 4945 | (+) | NCTATAAAAR      | TATTTAAAAG      |
| M0025 |            | 0.79142 |      |     |                 |                 |
| 2     | V\$TATA_01 | 3       | 4946 | (+) | STATAAAWRNNNNNN | ATTTAAAAGATTGA  |
| M0021 |            | 0.75072 |      |     |                 |                 |
| 6     | V\$TATA_C  | 6       | 4987 | (+) | NCTATAAAAR      | TTTTTAATAT      |
| M0021 |            | 0.75336 |      |     |                 |                 |
| 6     | V\$TATA_C  | 7       | 4990 | (+) | NCTATAAAAR      | TTAATATAAT      |
| M0025 |            | 0.78152 |      |     |                 |                 |
| 2     | V\$TATA_01 | 8       | 5094 | (+) | STATAAAWRNNNNNN | TTATTTATGGTGTTA |
| M0021 |            | 0.75072 |      |     |                 |                 |
| 6     | V\$TATA_C  | 6       | 5251 | (+) | NCTATAAAAR      | TTTTTTAAAT      |
| M0021 |            | 0.76815 |      |     |                 |                 |
| 6     | V\$TATA_C  | 4       | 5252 | (+) | NCTATAAAAR      | TTTTTAAATA      |
| M0025 |            | 0.80461 |      |     |                 |                 |
| 2     | V\$TATA_01 | 8       | 5261 | (+) | STATAAAWRNNNNNN | ATTTTTAAGCACACA |
| M0021 |            | 0.77185 |      |     |                 |                 |
| 6     | V\$TATA_C  | 1       | 5289 | (+) | NCTATAAAAR      | AGCTTAAATA      |
| M0025 |            | 0.80817 |      |     |                 |                 |
| 2     | V\$TATA_01 | 1       | 5290 | (+) | STATAAAWRNNNNNN | GCTTAAATAAGAAAA |

|       |            |         |      |     |                  |                  |
|-------|------------|---------|------|-----|------------------|------------------|
| M0025 |            | 0.77213 |      |     |                  |                  |
| 2     | V\$TATA_01 | 9       | 5292 | (+) | STATAAAWRNNNNNNN | TTAAATAAAGAAAAAC |
| M0021 |            | 0.78716 |      |     |                  |                  |
| 6     | V\$TATA_C  | 7       | 5337 | (+) | NCTATAAAAR       | TGCAAAAAAT       |
| M0021 |            | 0.76630 |      |     |                  |                  |
| 6     | V\$TATA_C  | 6       | 5356 | (+) | NCTATAAAAR       | TTCACAAAAA       |
| M0021 |            | 0.75151 |      |     |                  |                  |
| 6     | V\$TATA_C  | 8       | 5436 | (+) | NCTATAAAAR       | TGAAAAAAA        |
| M0021 |            |         |      |     |                  |                  |
| 6     | V\$TATA_C  | 0.76921 | 5510 | (+) | NCTATAAAAR       | ATTATCAAAT       |
| M0021 |            | 0.90520 |      |     |                  |                  |
| 6     | V\$TATA_C  | 2       | 5537 | (+) | NCTATAAAAR       | AGCTTAAAG        |
| M0025 |            | 0.82948 |      |     |                  |                  |
| 2     | V\$TATA_01 | 5       | 5538 | (+) | STATAAAWRNNNNNNN | GCTTAAAGAGGAAT   |
| M0021 |            |         |      |     |                  |                  |
| 6     | V\$TATA_C  | 0.78479 | 5590 | (+) | NCTATAAAAR       | TCTATTTAAT       |
| M0025 |            | 0.81324 |      |     |                  |                  |
| 2     | V\$TATA_01 | 5       | 5591 | (+) | STATAAAWRNNNNNNN | CTATTTAATTCAGCT  |
| M0021 |            | 0.76287 |      |     |                  |                  |
| 6     | V\$TATA_C  | 3       | 5619 | (+) | NCTATAAAAR       | GCCATATACA       |
| M0025 |            | 0.77264 |      |     |                  |                  |
| 2     | V\$TATA_01 | 7       | 5633 | (+) | STATAAAWRNNNNNNN | TTATAGATATCCATT  |
| M0025 |            | 0.78279 |      |     |                  |                  |
| 2     | V\$TATA_01 | 6       | 5713 | (+) | STATAAAWRNNNNNNN | ACATAAATGATATTT  |
| M0025 |            |         |      |     |                  |                  |
| 2     | V\$TATA_01 | 0.77087 | 5722 | (+) | STATAAAWRNNNNNNN | ATATTTAAATTATTT  |
| M0021 |            | 0.74359 |      |     |                  |                  |
| 6     | V\$TATA_C  | 7       | 5733 | (+) | NCTATAAAAR       | ATTTTAAAGT       |
| M0021 |            | 0.83152 |      |     |                  |                  |
| 6     | V\$TATA_C  | 9       | 5815 | (+) | NCTATAAAAR       | CGTATGAAAA       |
| M0025 |            | 0.81781 |      |     |                  |                  |
| 2     | V\$TATA_01 | 3       | 5816 | (+) | STATAAAWRNNNNNNN | GTATGAAAAATACGAA |
| M0021 |            | 0.82492 |      |     |                  |                  |
| 6     | V\$TATA_C  | 7       | 5863 | (+) | NCTATAAAAR       | AGTATGAAAA       |
| M0025 |            | 0.80994 |      |     |                  |                  |
| 2     | V\$TATA_01 | 7       | 5864 | (+) | STATAAAWRNNNNNNN | GTATGAAAAACATTT  |
| M0021 |            | 0.76287 |      |     |                  |                  |
| 6     | V\$TATA_C  | 3       | 5875 | (+) | NCTATAAAAR       | ATTTTAGAAA       |
| M0021 |            | 0.79376 |      |     |                  |                  |
| 6     | V\$TATA_C  | 8       | 5877 | (+) | NCTATAAAAR       | TTTAGAAAAA       |
| M0021 |            | 0.74438 |      |     |                  |                  |
| 6     | V\$TATA_C  | 9       | 5880 | (+) | NCTATAAAAR       | AGAAAAAAA        |
| M0021 |            | 0.83390 |      |     |                  |                  |
| 6     | V\$TATA_C  | 5       | 5919 | (+) | NCTATAAAAR       | ACTTTCAAAA       |
| M0021 |            | 0.75019 |      |     |                  |                  |
| 6     | V\$TATA_C  | 8       | 5920 | (+) | NCTATAAAAR       | CTTTCAAAAT       |
| M0021 |            | 0.83628 |      |     |                  |                  |
| 6     | V\$TATA_C  | 2       | 6007 | (+) | NCTATAAAAR       | AGTATAAATG       |
| M0025 |            | 0.88556 |      |     |                  |                  |
| 2     | V\$TATA_01 | 2       | 6008 | (+) | STATAAAWRNNNNNNN | GTATAAATGAATGAA  |
| M0021 |            | 0.85186 |      |     |                  |                  |
| 6     | V\$TATA_C  | 2       | 6023 | (+) | NCTATAAAAR       | TGGATAAAAAG      |
| M0025 |            | 0.82542 |      |     |                  |                  |
| 2     | V\$TATA_01 | 5       | 6024 | (+) | STATAAAWRNNNNNNN | GGATAAAGAATGAA   |
| M0025 |            | 0.78203 |      |     |                  |                  |
| 2     | V\$TATA_01 | 5       | 6108 | (+) | STATAAAWRNNNNNNN | CTACATGAAGCAATA  |
| M0025 |            | 0.78990 |      |     |                  |                  |
| 2     | V\$TATA_01 | 1       | 6118 | (+) | STATAAAWRNNNNNNN | CAATATATCTGCTCC  |
| M0021 |            | 0.84103 |      |     |                  |                  |
| 6     | V\$TATA_C  | 5       | 6171 | (+) | NCTATAAAAR       | TCTTTAAACA       |
| M0025 |            | 0.77137 |      |     |                  |                  |
| 2     | V\$TATA_01 | 8       | 6172 | (+) | STATAAAWRNNNNNNN | CTTTAAACACAAGTT  |
| M0021 |            | 0.77950 |      |     |                  |                  |
| 6     | V\$TATA_C  | 9       | 6201 | (+) | NCTATAAAAR       | TTTTTCAAAG       |
| M0021 |            | 0.76762 |      |     |                  |                  |
| 6     | V\$TATA_C  | 6       | 6210 | (+) | NCTATAAAAR       | GTTTTAATAG       |

|       |            |         |      |     |                      |                     |
|-------|------------|---------|------|-----|----------------------|---------------------|
| M0025 |            | 0.80969 |      |     |                      |                     |
| 2     | V\$TATA_01 | 3       | 6210 | (+) | STATAAAWRNNNNNNN     | GTTTAAATAGCTTTG     |
| M0021 |            | 0.78188 |      |     |                      |                     |
| 6     | V\$TATA_C  | 5       | 6224 | (+) | NCTATAAAAR           | GTTATTAAAA          |
| M0021 |            | 0.78320 |      |     |                      |                     |
| 6     | V\$TATA_C  | 6       | 6225 | (+) | NCTATAAAAR           | TTATTAAC            |
| M0025 |            | 0.82136 |      |     |                      |                     |
| 2     | V\$TATA_01 | 5       | 6225 | (+) | STATAAAWRNNNNNNN     | TTATTAACACAT        |
| M0021 |            | 0.75574 |      |     |                      |                     |
| 6     | V\$TATA_C  | 3       | 6243 | (+) | NCTATAAAAR           | GGTATTTAA           |
| M0025 |            | 0.81045 |      |     |                      |                     |
| 2     | V\$TATA_01 | 4       | 6244 | (+) | STATAAAWRNNNNNNN     | GTATTTAAAAATTTA     |
| M0021 |            | 0.84816 |      |     |                      |                     |
| 6     | V\$TATA_C  | 5       | 6245 | (+) | NCTATAAAAR           | TATTTAAAA           |
| M0021 |            | 0.74359 |      |     |                      |                     |
| 6     | V\$TATA_C  | 7       | 6246 | (+) | NCTATAAAAR           | ATTTAAAAAT          |
| M0025 |            |         |      |     |                      |                     |
| 2     | V\$TATA_01 | 0.81223 | 6246 | (+) | STATAAAWRNNNNNNN     | ATTTAAAAATTTACA     |
| M0021 |            | 0.76841 |      |     |                      |                     |
| 6     | V\$TATA_C  | 8       | 6344 | (+) | NCTATAAAAR           | ATTCTAAAC           |
| M0021 |            | 0.84209 |      |     |                      |                     |
| 6     | V\$TATA_C  | 1       | 6352 | (+) | NCTATAAAAR           | ACTATTAAAT          |
| M0025 |            | 0.79700 |      |     |                      |                     |
| 2     | V\$TATA_01 | 6       | 6353 | (+) | STATAAAWRNNNNNNN     | CTATTAAATATAATA     |
| M0025 |            | 0.77645 |      |     |                      |                     |
| 2     | V\$TATA_01 | 3       | 6358 | (+) | STATAAAWRNNNNNNN     | AAATATAATATAAGG     |
| M0025 |            | 0.78051 |      |     |                      |                     |
| 2     | V\$TATA_01 | 3       | 6360 | (+) | STATAAAWRNNNNNNN     | ATATAATATAAGGGA     |
| M0021 |            |         |      |     |                      |                     |
| 6     | V\$TATA_C  | 0.77502 | 6362 | (+) | NCTATAAAAR           | ATAATATAAG          |
| M0025 |            | 0.81806 |      |     |                      |                     |
| 2     | V\$TATA_01 | 6       | 6363 | (+) | STATAAAWRNNNNNNN     | TAATATAAGGGAAAT     |
| M0025 |            |         |      |     |                      |                     |
| 2     | V\$TATA_01 | 0.77696 | 6374 | (+) | STATAAAWRNNNNNNN     | AAATAAGAGTAAA       |
| M0021 |            | 0.80749 |      |     |                      |                     |
| 6     | V\$TATA_C  | 9       | 6383 | (+) | NCTATAAAAR           | AGTAAAAAT           |
| M0021 |            | 0.74887 |      |     |                      |                     |
| 6     | V\$TATA_C  | 8       | 6456 | (+) | NCTATAAAAR           | ACTAAACAG           |
| M0021 |            | 0.75574 |      |     |                      |                     |
| 6     | V\$TATA_C  | 3       | 6481 | (+) | NCTATAAAAR           | AGAAAAAAG           |
| M0021 |            | 0.75442 |      |     |                      |                     |
| 6     | V\$TATA_C  | 3       | 6548 | (+) | NCTATAAAAR           | AGCTTAAATT          |
| M0021 |            | 0.77898 |      |     |                      |                     |
| 6     | V\$TATA_C  | 1       | 6638 | (+) | NCTATAAAAR           | TGCTTAAATA          |
| M0025 |            | 0.80690 |      |     |                      |                     |
| 2     | V\$TATA_01 | 2       | 6645 | (+) | STATAAAWRNNNNNNN     | ATATTTATACATCAT     |
| M0021 |            | 0.79931 |      |     |                      |                     |
| 6     | V\$TATA_C  | 3       | 6735 | (+) | NCTATAAAAR           | AGTTAAAAA           |
| M0025 |            | 0.77797 |      |     |                      |                     |
| 2     | V\$TATA_01 | 5       | 6735 | (+) | STATAAAWRNNNNNNN     | AGTTAAAAAAG         |
| M0021 |            | 0.78188 |      |     |                      |                     |
| 6     | V\$TATA_C  | 5       | 6736 | (+) | NCTATAAAAR           | GTAAAAA             |
| M0005 |            | 0.78276 |      |     |                      |                     |
| 9     | V\$YY1_01  | 5       | 99   | (+) | NNNNNCCATNTWNNNWN    | AATTAGCATTTTACTAA   |
| M0005 |            | 0.79783 |      |     |                      |                     |
| 9     | V\$YY1_01  | 7       | 212  | (+) | NNNNNCCATNTWNNNWN    | TGTATACATATAACAAA   |
| M0005 |            | 0.80963 |      |     |                      |                     |
| 9     | V\$YY1_01  | 3       | 346  | (-) | NNNNNCCATNTWNNNWN    | ATTTGCAATGTTGATA    |
| M0005 |            | 0.84927 |      |     |                      |                     |
| 9     | V\$YY1_01  | 9       | 415  | (+) | NNNNNCCATNTWNNNWN    | ATTGATCATTTTAAAC    |
| M0005 |            | 0.84895 |      |     |                      |                     |
| 9     | V\$YY1_01  | 2       | 444  | (-) | NNNNNCCATNTWNNNWN    | TACTGAAATGTAGATA    |
| M0005 |            | 0.78505 |      |     |                      |                     |
| 9     | V\$YY1_01  | 9       | 565  | (+) | NNNNNCCATNTWNNNWN    | AAATAACATTTCTGGTA   |
| M0006 |            | 0.79578 |      |     |                      |                     |
| 9     | V\$YY1_02  | 7       | 589  | (+) | NNNCGGCCATCTTGNCTSNW | TCAAGGCCATTTTATTTTG |

|       |           |         |      |     |                      |                      |
|-------|-----------|---------|------|-----|----------------------|----------------------|
| M0005 |           | 0.88499 |      |     |                      |                      |
| 9     | V\$YY1_01 | 3       | 590  | (+) | NNNNNCCATNTWNNNNWN   | CAAGGCCATTTTTATTT    |
| M0005 |           | 0.77948 |      |     |                      |                      |
| 9     | V\$YY1_01 | 9       | 718  | (-) | NNNNNCCATNTWNNNNWN   | ACAAATATATGAAAACA    |
| M0005 |           | 0.79652 |      |     |                      |                      |
| 9     | V\$YY1_01 | 7       | 752  | (-) | NNNNNCCATNTWNNNNWN   | CTATAAATATGTCTTTT    |
| M0005 |           |         |      |     |                      |                      |
| 9     | V\$YY1_01 | 0.79194 | 768  | (-) | NNNNNCCATNTWNNNNWN   | TTTAACAAATGCAGGTA    |
| M0005 |           | 0.83387 |      |     |                      |                      |
| 9     | V\$YY1_01 | 9       | 858  | (+) | NNNNNCCATNTWNNNNWN   | AAATTTTCATGTATAATC   |
| M0005 |           | 0.82896 |      |     |                      |                      |
| 9     | V\$YY1_01 | 5       | 894  | (+) | NNNNNCCATNTWNNNNWN   | GAAACGCATTTTTCCAG    |
| M0005 |           | 0.82437 |      |     |                      |                      |
| 9     | V\$YY1_01 | 7       | 1001 | (+) | NNNNNCCATNTWNNNNWN   | CATCTTCATTTCAGTCAT   |
| M0005 |           | 0.78047 |      |     |                      |                      |
| 9     | V\$YY1_01 | 2       | 1013 | (-) | NNNNNCCATNTWNNNNWN   | GTCATGTCATGGATATA    |
| M0005 |           | 0.78505 |      |     |                      |                      |
| 9     | V\$YY1_01 | 9       | 1099 | (-) | NNNNNCCATNTWNNNNWN   | AATGCACAATGTTTTTC    |
| M0005 |           |         |      |     |                      |                      |
| 9     | V\$YY1_01 | 0.81979 | 1146 | (+) | NNNNNCCATNTWNNNNWN   | TAAAGACATTTTAAAAA    |
| M0005 |           | 0.80635 |      |     |                      |                      |
| 9     | V\$YY1_01 | 6       | 1169 | (-) | NNNNNCCATNTWNNNNWN   | GATATTAAATGTAATTT    |
| M0005 |           | 0.77522 |      |     |                      |                      |
| 9     | V\$YY1_01 | 9       | 1688 | (+) | NNNNNCCATNTWNNNNWN   | TAAAGTCATCTCAAATG    |
| M0005 |           | 0.78800 |      |     |                      |                      |
| 9     | V\$YY1_01 | 8       | 1790 | (-) | NNNNNCCATNTWNNNNWN   | TTAAAGCTATGGTAATC    |
| M0005 |           | 0.79030 |      |     |                      |                      |
| 9     | V\$YY1_01 | 1       | 1973 | (+) | NNNNNCCATNTWNNNNWN   | TGGGTCCATTATAGGCT    |
| M0005 |           | 0.81716 |      |     |                      |                      |
| 9     | V\$YY1_01 | 9       | 1987 | (+) | NNNNNCCATNTWNNNNWN   | GCTTAACATATTTGTAA    |
| M0005 |           | 0.79423 |      |     |                      |                      |
| 9     | V\$YY1_01 | 3       | 1999 | (+) | NNNNNCCATNTWNNNNWN   | TGTAAACATATATATAT    |
| M0005 |           | 0.83551 |      |     |                      |                      |
| 9     | V\$YY1_01 | 8       | 2082 | (+) | NNNNNCCATNTWNNNNWN   | CGACACCATTGATGGCA    |
| M0006 |           |         |      |     |                      |                      |
| 9     | V\$YY1_02 | 0.75241 | 2083 | (-) | NNNCGGCCATCTTGNCTSNW | GACACCATTGATGGCAGCCC |
| M0005 |           | 0.78473 |      |     |                      |                      |
| 9     | V\$YY1_01 | 1       | 2085 | (-) | NNNNNCCATNTWNNNNWN   | CACCATTGATGGCAGCC    |
| M0005 |           | 0.78014 |      |     |                      |                      |
| 9     | V\$YY1_01 | 4       | 2135 | (-) | NNNNNCCATNTWNNNNWN   | CAAGAACACTGGAGTGG    |
| M0005 |           | 0.78309 |      |     |                      |                      |
| 9     | V\$YY1_01 | 3       | 2151 | (+) | NNNNNCCATNTWNNNNWN   | GGTTGCCATTTCCCTTCT   |
| M0005 |           | 0.78178 |      |     |                      |                      |
| 9     | V\$YY1_01 | 2       | 2225 | (+) | NNNNNCCATNTWNNNNWN   | CAACCCCATGGACTGCC    |
| M0005 |           | 0.81323 |      |     |                      |                      |
| 9     | V\$YY1_01 | 7       | 2248 | (-) | NNNNNCCATNTWNNNNWN   | CTCCATCCATGGGATT     |
| M0005 |           |         |      |     |                      |                      |
| 9     | V\$YY1_01 | 0.78768 | 2338 | (+) | NNNNNCCATNTWNNNNWN   | TGTATCCACTTTTGAA     |
| M0005 |           | 0.80996 |      |     |                      |                      |
| 9     | V\$YY1_01 | 1       | 2513 | (+) | NNNNNCCATNTWNNNNWN   | CAAATTCAGTTATTAAT    |
| M0006 |           | 0.79917 |      |     |                      |                      |
| 9     | V\$YY1_02 | 9       | 2615 | (-) | NNNCGGCCATCTTGNCTSNW | AGCAGCCCACAAGGCTCCCC |
| M0005 |           | 0.78014 |      |     |                      |                      |
| 9     | V\$YY1_01 | 4       | 2655 | (-) | NNNNNCCATNTWNNNNWN   | CAAGAACACTGGAGTGG    |
| M0005 |           | 0.78309 |      |     |                      |                      |
| 9     | V\$YY1_01 | 3       | 2671 | (+) | NNNNNCCATNTWNNNNWN   | GGTTGCCATTTCCCTTCT   |
| M0005 |           |         |      |     |                      |                      |
| 9     | V\$YY1_01 | 0.78768 | 2775 | (-) | NNNNNCCATNTWNNNNWN   | CTCTGTCCATGGGATT     |
| M0005 |           | 0.81389 |      |     |                      |                      |
| 9     | V\$YY1_01 | 3       | 2953 | (-) | NNNNNCCATNTWNNNNWN   | TTTCTGAAATGCTGAGA    |
| M0005 |           | 0.91546 |      |     |                      |                      |
| 9     | V\$YY1_01 | 5       | 3077 | (-) | NNNNNCCATNTWNNNNWN   | ATCAAAAAGATGGAAATA   |
| M0005 |           | 0.80635 |      |     |                      |                      |
| 9     | V\$YY1_01 | 6       | 3149 | (+) | NNNNNCCATNTWNNNNWN   | GTAGTCCATATCTTTTC    |
| M0005 |           | 0.90629 |      |     |                      |                      |
| 9     | V\$YY1_01 | 1       | 3229 | (+) | NNNNNCCATNTWNNNNWN   | AAACATCATTTTTTAAT    |

|       |           |         |      |     |                      |                      |
|-------|-----------|---------|------|-----|----------------------|----------------------|
| M0005 |           | 0.78702 |      |     |                      |                      |
| 9     | V\$YY1_01 | 5       | 3245 | (+) | NNNNNCCATNTWNNNNWN   | TGCTAACATTTAACAAA    |
| M0005 |           | 0.82732 |      |     |                      |                      |
| 9     | V\$YY1_01 | 6       | 3279 | (-) | NNNNNCCATNTWNNNNWN   | CAGTTAAATGCAGATT     |
| M0006 |           |         |      |     |                      |                      |
| 9     | V\$YY1_02 | 0.75116 | 3387 | (+) | NNNCGGCCATCTTGNCTSNW | TCTCCACCATATTCTAAAAA |
| M0005 |           | 0.84862 |      |     |                      |                      |
| 9     | V\$YY1_01 | 4       | 3388 | (+) | NNNNNCCATNTWNNNNWN   | CTCCACCATATTCTAAA    |
| M0005 |           | 0.80078 |      |     |                      |                      |
| 9     | V\$YY1_01 | 6       | 3750 | (+) | NNNNNCCATNTWNNNNWN   | AACAGCCAGTTTCACAT    |
| M0006 |           | 0.77543 |      |     |                      |                      |
| 9     | V\$YY1_02 | 7       | 3827 | (-) | NNNCGGCCATCTTGNCTSNW | TTTAGAGAAGAGGGCATTG  |
| M0005 |           | 0.81356 |      |     |                      |                      |
| 9     | V\$YY1_01 | 5       | 3899 | (-) | NNNNNCCATNTWNNNNWN   | AACAGAATATGTATATG    |
| M0005 |           | 0.79718 |      |     |                      |                      |
| 9     | V\$YY1_01 | 2       | 3987 | (+) | NNNNNCCATNTWNNNNWN   | GATCTCAATTTACACAC    |
| M0005 |           | 0.90039 |      |     |                      |                      |
| 9     | V\$YY1_01 | 3       | 4073 | (+) | NNNNNCCATNTWNNNNWN   | TCAGTTCATTTTTTAAT    |
| M0005 |           | 0.79128 |      |     |                      |                      |
| 9     | V\$YY1_01 | 4       | 4194 | (+) | NNNNNCCATNTWNNNNWN   | AATTTTCATTGTATAC     |
| M0005 |           | 0.78538 |      |     |                      |                      |
| 9     | V\$YY1_01 | 7       | 4208 | (+) | NNNNNCCATNTWNNNNWN   | TACCTTCATTCAATTG     |
| M0005 |           | 0.82306 |      |     |                      |                      |
| 9     | V\$YY1_01 | 7       | 4223 | (+) | NNNNNCCATNTWNNNNWN   | TGTATCCAGATACTCAG    |
| M0005 |           | 0.92496 |      |     |                      |                      |
| 9     | V\$YY1_01 | 7       | 4349 | (-) | NNNNNCCATNTWNNNNWN   | AACCAAATATGGTGTCT    |
| M0005 |           | 0.85353 |      |     |                      |                      |
| 9     | V\$YY1_01 | 9       | 4442 | (-) | NNNNNCCATNTWNNNNWN   | CTAAATAAATGGAGAAT    |
| M0005 |           | 0.79423 |      |     |                      |                      |
| 9     | V\$YY1_01 | 3       | 4461 | (-) | NNNNNCCATNTWNNNNWN   | GTGTTCAAATGGAAAAA    |
| M0005 |           | 0.79685 |      |     |                      |                      |
| 9     | V\$YY1_01 | 5       | 4526 | (-) | NNNNNCCATNTWNNNNWN   | ATTCCTACAGGAAGTCC    |
| M0005 |           | 0.84141 |      |     |                      |                      |
| 9     | V\$YY1_01 | 5       | 4643 | (+) | NNNNNCCATNTWNNNNWN   | TACAAACATTTTTTCAC    |
| M0005 |           | 0.86959 |      |     |                      |                      |
| 9     | V\$YY1_01 | 4       | 4669 | (+) | NNNNNCCATNTWNNNNWN   | TATTTTCATTACTCAC     |
| M0005 |           | 0.82011 |      |     |                      |                      |
| 9     | V\$YY1_01 | 8       | 4710 | (-) | NNNNNCCATNTWNNNNWN   | AATTATATATGCAAATA    |
| M0005 |           | 0.79259 |      |     |                      |                      |
| 9     | V\$YY1_01 | 5       | 4821 | (+) | NNNNNCCATNTWNNNNWN   | AATTTCCATTCTCATTA    |
| M0005 |           | 0.77391 |      |     |                      |                      |
| 9     | V\$YY1_01 | 9       | 4975 | (-) | NNNNNCCATNTWNNNNWN   | TAGCCTGAATGATTTTT    |
| M0005 |           | 0.80963 |      |     |                      |                      |
| 9     | V\$YY1_01 | 3       | 5092 | (-) | NNNNNCCATNTWNNNNWN   | TGTTATTTATGGTGTTA    |
| M0005 |           | 0.78342 |      |     |                      |                      |
| 9     | V\$YY1_01 | 1       | 5361 | (+) | NNNNNCCATNTWNNNNWN   | AAAAAGCATATTTATTT    |
| M0005 |           |         |      |     |                      |                      |
| 9     | V\$YY1_01 | 0.78211 | 5422 | (-) | NNNNNCCATNTWNNNNWN   | TTTTTTTGATGGAATGA    |
| M0005 |           | 0.81389 |      |     |                      |                      |
| 9     | V\$YY1_01 | 3       | 5452 | (+) | NNNNNCCATNTWNNNNWN   | TATATTCAATTTCTCCA    |
| M0005 |           | 0.86893 |      |     |                      |                      |
| 9     | V\$YY1_01 | 8       | 5461 | (+) | NNNNNCCATNTWNNNNWN   | TTTCTCCATTTTATGTT    |
| M0005 |           | 0.80471 |      |     |                      |                      |
| 9     | V\$YY1_01 | 8       | 5482 | (+) | NNNNNCCATNTWNNNNWN   | GGTTAACATTTTATCTT    |
| M0005 |           | 0.77064 |      |     |                      |                      |
| 9     | V\$YY1_01 | 2       | 5539 | (-) | NNNNNCCATNTWNNNNWN   | CTTAAAGAGGAATTGG     |
| M0005 |           | 0.85026 |      |     |                      |                      |
| 9     | V\$YY1_01 | 2       | 5615 | (+) | NNNNNCCATNTWNNNNWN   | AAACGCCATATACATTT    |
| M0005 |           | 0.78112 |      |     |                      |                      |
| 9     | V\$YY1_01 | 7       | 5621 | (+) | NNNNNCCATNTWNNNNWN   | CATATACATTTCTTATA    |
| M0005 |           | 0.86304 |      |     |                      |                      |
| 9     | V\$YY1_01 | 1       | 5638 | (+) | NNNNNCCATNTWNNNNWN   | GATATCCATTCAATCAT    |
| M0005 |           | 0.77522 |      |     |                      |                      |
| 9     | V\$YY1_01 | 9       | 5684 | (-) | NNNNNCCATNTWNNNNWN   | GAAGGTCAATGAACTGA    |
| M0005 |           | 0.83912 |      |     |                      |                      |
| 9     | V\$YY1_01 | 2       | 5711 | (-) | NNNNNCCATNTWNNNNWN   | GAACATAAATGATATTT    |

|                  |            |         |      |     |                      |                      |
|------------------|------------|---------|------|-----|----------------------|----------------------|
| M0005            |            | 0.82175 |      |     |                      |                      |
| 9                | V\$YY1_01  | 6       | 5748 | (+) | NNNNNCCATNTWNNNNWN   | CAAAATCATATTTTGCA    |
| M0005            |            | 0.84731 |      |     |                      |                      |
| 9                | V\$YY1_01  | 3       | 5845 | (-) | NNNNNCCATNTWNNNNWN   | GTCAAAAAATGCTTGTG    |
| M0005            |            | 0.85124 |      |     |                      |                      |
| 9                | V\$YY1_01  | 5       | 5868 | (+) | NNNNNCCATNTWNNNNWN   | GAAAAACATTTTAGAAA    |
| M0005            |            | 0.79947 |      |     |                      |                      |
| 9                | V\$YY1_01  | 6       | 5888 | (+) | NNNNNCCATNTWNNNNWN   | AAATTTTCATGTAACATT   |
| M0006            |            | 0.75258 |      |     |                      |                      |
| 9                | V\$YY1_02  | 8       | 5918 | (-) | NNNCGGCCATCTTGNCTSNW | AACTTTCAAAATGACTGATG |
| M0005            |            | 0.78735 |      |     |                      |                      |
| 9                | V\$YY1_01  | 3       | 5920 | (-) | NNNNNCCATNTWNNNNWN   | CTTTCAAAATGACTGAT    |
| M0005            |            | 0.78276 |      |     |                      |                      |
| 9                | V\$YY1_01  | 5       | 5981 | (-) | NNNNNCCATNTWNNNNWN   | TTGCAACCATGAGGAGA    |
| M0005            |            | 0.79816 |      |     |                      |                      |
| 9                | V\$YY1_01  | 5       | 6014 | (-) | NNNNNCCATNTWNNNNWN   | ATGAATGAATGGATAAA    |
| M0005            |            | 0.86992 |      |     |                      |                      |
| 9                | V\$YY1_01  | 1       | 6042 | (-) | NNNNNCCATNTWNNNNWN   | GTGCAATTATGGACTGA    |
| M0005            |            | 0.77064 |      |     |                      |                      |
| 9                | V\$YY1_01  | 2       | 6129 | (-) | NNNNNCCATNTWNNNNWN   | CTCCAAGAATGTTTTAC    |
| M0005            |            | 0.77817 |      |     |                      |                      |
| 9                | V\$YY1_01  | 8       | 6148 | (-) | NNNNNCCATNTWNNNNWN   | AGTCACAAATGATTTTT    |
| M0005            |            | 0.78702 |      |     |                      |                      |
| 9                | V\$YY1_01  | 5       | 6490 | (-) | NNNNNCCATNTWNNNNWN   | GATGCAACATGTATGTT    |
| M0005            |            | 0.79095 |      |     |                      |                      |
| 9                | V\$YY1_01  | 7       | 6582 | (-) | NNNNNCCATNTWNNNNWN   | ATACTGCTATGGTCATG    |
| M0005            |            | 0.85648 |      |     |                      |                      |
| 9                | V\$YY1_01  | 8       | 6595 | (-) | NNNNNCCATNTWNNNNWN   | CATGGAAACTGGACACA    |
| M0005            |            |         |      |     |                      |                      |
| 9                | V\$YY1_01  | 0.8519  | 6613 | (-) | NNNNNCCATNTWNNNNWN   | CATACTACATGGAGAAA    |
| M0005            |            | 0.81192 |      |     |                      |                      |
| 9                | V\$YY1_01  | 7       | 6627 | (+) | NNNNNCCATNTWNNNNWN   | AAAATTCATTTTGCTTA    |
| CSN1S2 Bos Tarus |            |         |      |     |                      |                      |
|                  |            | 0.82017 |      |     |                      |                      |
| M00216           | V\$TATA_C  | 4       | 13   | (+) | NCTATAAAAR           | GGTATAAATA           |
|                  |            | 0.91220 |      |     |                      |                      |
| M00252           | V\$TATA_01 | 5       | 14   | (+) | STATAAAWRNNNNNN      | GTATAAATAGTGTTG      |
|                  |            | 0.76841 |      |     |                      |                      |
| M00216           | V\$TATA_C  | 8       | 134  | (+) | NCTATAAAAR           | ATTGTAAAC            |
|                  |            | 0.77950 |      |     |                      |                      |
| M00216           | V\$TATA_C  | 9       | 168  | (+) | NCTATAAAAR           | TTTTTTAAAG           |
|                  |            | 0.77822 |      |     |                      |                      |
| M00252           | V\$TATA_01 | 9       | 168  | (+) | STATAAAWRNNNNNN      | TTTTTTAAAGAACT       |
|                  |            | 0.76815 |      |     |                      |                      |
| M00216           | V\$TATA_C  | 4       | 169  | (+) | NCTATAAAAR           | TTTTTAAAGA           |
|                  |            | 0.78901 |      |     |                      |                      |
| M00216           | V\$TATA_C  | 5       | 194  | (+) | NCTATAAAAR           | ACCTTAAGAT           |
|                  |            | 0.86268 |      |     |                      |                      |
| M00216           | V\$TATA_C  | 8       | 261  | (+) | NCTATAAAAR           | TTCTTAAAAA           |
|                  |            | 0.84103 |      |     |                      |                      |
| M00216           | V\$TATA_C  | 5       | 262  | (+) | NCTATAAAAR           | TCTTAAAAAA           |
|                  |            |         |      |     |                      |                      |
| M00216           | V\$TATA_C  | 0.79324 | 263  | (+) | NCTATAAAAR           | CTTAAAAAAA           |
|                  |            | 0.77112 |      |     |                      |                      |
| M00252           | V\$TATA_01 | 4       | 335  | (+) | STATAAAWRNNNNNN      | ATTTTAAGGAAGAGC      |
|                  |            | 0.76815 |      |     |                      |                      |
| M00216           | V\$TATA_C  | 4       | 364  | (+) | NCTATAAAAR           | TTTTTGAAAA           |
|                  |            | 0.75072 |      |     |                      |                      |
| M00216           | V\$TATA_C  | 6       | 365  | (+) | NCTATAAAAR           | TTTTGAAAAT           |
|                  |            | 0.77772 |      |     |                      |                      |
| M00252           | V\$TATA_01 | 1       | 365  | (+) | STATAAAWRNNNNNN      | TTTTGAAAATCCAGG      |
|                  |            | 0.75547 |      |     |                      |                      |
| M00216           | V\$TATA_C  | 9       | 444  | (+) | NCTATAAAAR           | CCTAACAAAG           |
|                  |            | 0.74201 |      |     |                      |                      |
| M00216           | V\$TATA_C  | 2       | 559  | (+) | NCTATAAAAR           | ATGATATAAG           |



|        |            |                    |      |     |                 |                 |
|--------|------------|--------------------|------|-----|-----------------|-----------------|
| M00252 | V\$TATA_01 | 0.78609<br>5       | 560  | (+) | STATAAAWRNNNNNN | TGATATAAGCATTTC |
| M00216 | V\$TATA_C  | 0.76868<br>2       | 625  | (+) | NCTATAAAAR      | AAAATAAAAT      |
| M00216 | V\$TATA_C  | 0.79033<br>5       | 660  | (+) | NCTATAAAAR      | GCTATATATA      |
| M00252 | V\$TATA_01 | 0.88175<br>6       | 661  | (+) | STATAAAWRNNNNNN | CTATATATAATGAAC |
| M00216 | V\$TATA_C  | 0.79192<br>0.85536 | 662  | (+) | NCTATAAAAR      | TATATATAAT      |
| M00252 | V\$TATA_01 | 0.76102<br>7       | 663  | (+) | STATAAAWRNNNNNN | ATATATAATGAACTT |
| M00216 | V\$TATA_C  | 0.89120<br>5       | 678  | (+) | NCTATAAAAR      | ATTTCAAAAA      |
| M00216 | V\$TATA_C  | 0.82009<br>7       | 693  | (+) | NCTATAAAAR      | ATTATAAAAT      |
| M00252 | V\$TATA_01 | 0.77036<br>6       | 694  | (+) | STATAAAWRNNNNNN | TTATAAAATTTAATA |
| M00252 | V\$TATA_01 | 0.85661<br>3       | 706  | (+) | STATAAAWRNNNNNN | ATATATTTATCATCT |
| M00216 | V\$TATA_C  | 0.77645<br>5       | 722  | (+) | NCTATAAAAR      | ATTTTAAAC       |
| M00252 | V\$TATA_01 | 0.76921<br>3       | 722  | (+) | STATAAAWRNNNNNN | ATTTTAAACATTGT  |
| M00216 | V\$TATA_C  | 0.83654<br>6       | 738  | (+) | NCTATAAAAR      | ATTATGAAAT      |
| M00216 | V\$TATA_C  | 0.80664<br>6       | 747  | (+) | NCTATAAAAR      | TGCTTATAAA      |
| M00252 | V\$TATA_01 | 0.77581<br>8       | 748  | (+) | STATAAAWRNNNNNN | GCTTATAAAGTGAAT |
| M00216 | V\$TATA_C  | 0.81349<br>2       | 749  | (+) | NCTATAAAAR      | CTTATAAAGT      |
| M00252 | V\$TATA_01 | 0.76366<br>9       | 750  | (+) | STATAAAWRNNNNNN | TTATAAAGTGAATGT |
| M00216 | V\$TATA_C  | 0.77528<br>5       | 777  | (+) | NCTATAAAAR      | CCTGTAAGAG      |
| M00216 | V\$TATA_C  | 0.92843<br>4       | 939  | (+) | NCTATAAAAR      | CAAATAAAAT      |
| M00216 | V\$TATA_C  | 0.84876<br>9       | 954  | (+) | NCTATAAAAR      | TGTTTAAAAA      |
| M00252 | V\$TATA_01 | 0.77036<br>9       | 955  | (+) | STATAAAWRNNNNNN | GTTTAAAAATAATTG |
| M00252 | V\$TATA_01 | 0.74491<br>3       | 1005 | (+) | STATAAAWRNNNNNN | TTATATGTCAAAAAG |
| M00216 | V\$TATA_C  | 0.75706<br>7       | 1020 | (+) | NCTATAAAAR      | TCATTAGAAT      |
| M00216 | V\$TATA_C  | 0.80131<br>4       | 1064 | (+) | NCTATAAAAR      | ACTGGAAAAG      |
| M00252 | V\$TATA_01 | 0.78188<br>9       | 1108 | (+) | STATAAAWRNNNNNN | TTATATGTGGTCATA |
| M00216 | V\$TATA_C  | 0.75996<br>5       | 1169 | (+) | NCTATAAAAR      | AGTTAAAAAT      |
| M00216 | V\$TATA_C  | 0.88302<br>8       | 1337 | (+) | NCTATAAAAR      | CCCTTATGAG      |
| M00216 | V\$TATA_C  | 0.77950<br>1       | 1384 | (+) | NCTATAAAAR      | ATTTTAAAAA      |
| M00216 | V\$TATA_C  | 0.81197<br>9       | 1385 | (+) | NCTATAAAAR      | TTTTAAAAAG      |
| M00252 | V\$TATA_01 | 0.82175<br>7       | 1385 | (+) | STATAAAWRNNNNNN | TTTTAAAAAGATTTC |
| M00216 | V\$TATA_C  | 0.78025<br>9       | 1429 | (+) | NCTATAAAAR      | TCCATAAGAT      |
| M00252 | V\$TATA_01 | 0.79482<br>9       | 1437 | (+) | STATAAAWRNNNNNN | ATTTAAGAAGAATTG |
| M00216 | V\$TATA_C  | 4                  | 1448 | (+) | NCTATAAAAR      | ATTGTAAAAA      |

|        |            |         |      |     |                 |                 |
|--------|------------|---------|------|-----|-----------------|-----------------|
|        |            | 0.83205 |      |     |                 |                 |
| M00216 | V\$TATA_C  | 7       | 1450 | (+) | NCTATAAAAR      | TGTAAAAAAA      |
|        |            | 0.80385 |      |     |                 |                 |
| M00252 | V\$TATA_01 | 7       | 1458 | (+) | STATAAAWRNNNNNN | AAATATATGGCATT  |
|        |            | 0.82492 |      |     |                 |                 |
| M00216 | V\$TATA_C  | 7       | 1474 | (+) | NCTATAAAAR      | AGTATAAACA      |
|        |            | 0.80969 |      |     |                 |                 |
| M00252 | V\$TATA_01 | 3       | 1475 | (+) | STATAAAWRNNNNNN | GTATAAACATCATTA |
|        |            | 0.77696 |      |     |                 |                 |
| M00252 | V\$TATA_01 | 1547    | 1547 | (+) | STATAAAWRNNNNNN | GAATAAGTGGATAAA |
|        |            | 0.79269 |      |     |                 |                 |
| M00252 | V\$TATA_01 | 2       | 1555 | (+) | STATAAAWRNNNNNN | GGATAAATTAATAAA |
|        |            | 0.87490 |      |     |                 |                 |
| M00252 | V\$TATA_01 | 5       | 1578 | (+) | STATAAAWRNNNNNN | CTATTTATACATAGG |
|        |            | 0.77619 |      |     |                 |                 |
| M00252 | V\$TATA_01 | 9       | 1582 | (+) | STATAAAWRNNNNNN | TTATACATAGGGTCA |
|        |            | 0.78330 |      |     |                 |                 |
| M00252 | V\$TATA_01 | 4       | 1717 | (+) | STATAAAWRNNNNNN | GTATTCAAATCCATG |
|        |            | 0.79482 |      |     |                 |                 |
| M00216 | V\$TATA_C  | 4       | 1822 | (+) | NCTATAAAAR      | TGATTATAAG      |
|        |            | 0.82238 |      |     |                 |                 |
| M00252 | V\$TATA_01 | 1823    | 1823 | (+) | STATAAAWRNNNNNN | GATTATAAGGAGAGT |
|        |            | 0.77467 |      |     |                 |                 |
| M00252 | V\$TATA_01 | 6       | 1825 | (+) | STATAAAWRNNNNNN | TTATAAGGAGAGTAA |
|        |            | 0.7729  |      |     |                 |                 |
| M00252 | V\$TATA_01 | 1845    | 1845 | (+) | STATAAAWRNNNNNN | TTATTAATTAGCTTC |
|        |            | 0.82492 |      |     |                 |                 |
| M00216 | V\$TATA_C  | 7       | 1941 | (+) | NCTATAAAAR      | AGTATAATAA      |
|        |            | 0.84978 |      |     |                 |                 |
| M00252 | V\$TATA_01 | 4       | 1942 | (+) | STATAAAWRNNNNNN | GTATAATAAGATACA |
|        |            | 0.77036 |      |     |                 |                 |
| M00252 | V\$TATA_01 | 3       | 1969 | (+) | STATAAAWRNNNNNN | TTATGTAAATATAAG |
|        |            | 0.79243 |      |     |                 |                 |
| M00252 | V\$TATA_01 | 8       | 1973 | (+) | STATAAAWRNNNNNN | GTAAATATAAGAATA |
|        |            | 0.74016 |      |     |                 |                 |
| M00216 | V\$TATA_C  | 4       | 1974 | (+) | NCTATAAAAR      | TAAATATAAG      |
|        |            | 0.79599 |      |     |                 |                 |
| M00252 | V\$TATA_01 | 1       | 1975 | (+) | STATAAAWRNNNNNN | AAATATAAGAATATT |
|        |            | 0.74465 |      |     |                 |                 |
| M00216 | V\$TATA_C  | 3       | 1976 | (+) | NCTATAAAAR      | AATATAAGAA      |
|        |            | 0.78406 |      |     |                 |                 |
| M00252 | V\$TATA_01 | 5       | 1977 | (+) | STATAAAWRNNNNNN | ATATAAGAATATTAA |
|        |            | 0.77315 |      |     |                 |                 |
| M00252 | V\$TATA_01 | 4       | 1985 | (+) | STATAAAWRNNNNNN | ATATTAAATTGTTTA |
|        |            | 0.87536 |      |     |                 |                 |
| M00216 | V\$TATA_C  | 3       | 1994 | (+) | NCTATAAAAR      | TGTTTATAAG      |
|        |            | 0.86018 |      |     |                 |                 |
| M00252 | V\$TATA_01 | 8       | 1995 | (+) | STATAAAWRNNNNNN | GTTTATAAGGATAAT |
|        |            | 0.76868 |      |     |                 |                 |
| M00216 | V\$TATA_C  | 2       | 2041 | (+) | NCTATAAAAR      | AGTGTATAAA      |
|        |            | 0.77315 |      |     |                 |                 |
| M00252 | V\$TATA_01 | 4       | 2042 | (+) | STATAAAWRNNNNNN | GTGTATAAACTTTGA |
|        |            | 0.81462 |      |     |                 |                 |
| M00216 | V\$TATA_C  | 9       | 2043 | (+) | NCTATAAAAR      | TGTATAAACT      |
|        |            | 0.77493 |      |     |                 |                 |
| M00252 | V\$TATA_01 | 2044    | 2044 | (+) | STATAAAWRNNNNNN | GTATAAACTTTGAAA |
|        |            | 0.80749 |      |     |                 |                 |
| M00216 | V\$TATA_C  | 9       | 2050 | (+) | NCTATAAAAR      | ACTTTGAAAC      |
|        |            | 0.74412 |      |     |                 |                 |
| M00216 | V\$TATA_C  | 5       | 2059 | (+) | NCTATAAAAR      | CCTATAATCA      |
|        |            | 0.74016 |      |     |                 |                 |
| M00216 | V\$TATA_C  | 4       | 2088 | (+) | NCTATAAAAR      | CTTATGTAAG      |
|        |            | 0.77366 |      |     |                 |                 |
| M00252 | V\$TATA_01 | 2       | 2098 | (+) | STATAAAWRNNNNNN | TTATGAAGATGGACA |
|        |            | 0.79931 |      |     |                 |                 |
| M00216 | V\$TATA_C  | 3       | 2168 | (+) | NCTATAAAAR      | AGTTAAAAAA      |

|        |             |                    |      |     |                 |                 |
|--------|-------------|--------------------|------|-----|-----------------|-----------------|
| M00216 | V\$TATA_C   | 0.75547<br>9       | 2169 | (+) | NCTATAAAAR      | GTAAAAAAC       |
| M00252 | V\$TATA_01  | 0.77772<br>1       | 2169 | (+) | STATAAAWRNNNNNN | GTAAAAAACGTACA  |
| M00216 | V\$TATA_C   | 0.87404<br>3       | 2240 | (+) | NCTATAAAAR      | TTCTTAAAG       |
| M00216 | V\$TATA_C   | 0.83205<br>7       | 2263 | (+) | NCTATAAAAR      | ACCATAACAA      |
| M00252 | V\$TATA_01  | 0.77721<br>4       | 2264 | (+) | STATAAAWRNNNNNN | CCATAACAAGGACTT |
| M00216 | V\$TATA_C   | 0.85239<br>0.75019 | 2278 | (+) | NCTATAAAAR      | TCTTTTAAAG      |
| M00216 | V\$TATA_C   | 8                  | 2279 | (+) | NCTATAAAAR      | CTTTTAAAGT      |
| M00252 | V\$TATA_01  | 0.81426<br>0.80937 | 2279 | (+) | STATAAAWRNNNNNN | CTTTTAAAGTTCAGG |
| M00126 | V\$GATA1_02 | 5                  | 14   | (+) | NNNNNGATANKGNN  | GTATAAATAGTGTT  |
| M00075 | V\$GATA1_01 | 0.79121<br>4       | 30   | (-) | SNNGATNNNN      | GCCAATCCAT      |
| M00075 | V\$GATA1_01 | 0.86821<br>3       | 34   | (-) | SNNGATNNNN      | ATCCATCAGA      |
| M00076 | V\$GATA2_01 | 0.85926<br>9       | 34   | (-) | NNNGATRNNN      | ATCCATCAGA      |
| M00126 | V\$GATA1_02 | 0.82562<br>5       | 39   | (+) | NNNNNGATANKGNN  | TCAGAGATATTCCA  |
| M00075 | V\$GATA1_01 | 0.82477<br>8       | 41   | (+) | SNNGATNNNN      | AGAGATATTC      |
| M00076 | V\$GATA2_01 | 0.86648<br>6       | 41   | (+) | NNNGATRNNN      | AGAGATATTC      |
| M00077 | V\$GATA3_01 | 0.85201<br>6       | 42   | (+) | NNGATARNG       | GAGATATTC       |
| M00203 | V\$GATA_C   | 0.83690<br>6       | 61   | (-) | NGATAAGNMNN     | ACTACTTGCTCT    |
| M00127 | V\$GATA1_03 | 0.85031<br>8       | 62   | (-) | RNSNNGATAANNGN  | CTACTTGCTTCCT   |
| M00203 | V\$GATA_C   | 0.91643<br>4       | 97   | (-) | NGATAAGNMNN     | TTCATTTATCT     |
| M00126 | V\$GATA1_02 | 0.84625<br>0.87702 | 98   | (-) | NNNNNGATANKGNN  | TCATTTATCTTTTT  |
| M00127 | V\$GATA1_03 | 1                  | 98   | (-) | RNSNNGATAANNGN  | TCATTTATCTTTTT  |
| M00128 | V\$GATA1_04 | 0.90655<br>6       | 98   | (-) | NNCWGATARNNNN   | TCATTTATCTTTT   |
| M00076 | V\$GATA2_01 | 0.80694<br>6       | 100  | (-) | NNNGATRNNN      | ATTTATCTTT      |
| M00077 | V\$GATA3_01 | 0.84669<br>9       | 100  | (-) | NNGATARNG       | ATTTATCTT       |
| M00075 | V\$GATA1_01 | 0.81688<br>1       | 198  | (+) | SNNGATNNNN      | TAAGATTCTT      |
| M00076 | V\$GATA2_01 | 0.84122<br>7       | 198  | (+) | NNNGATRNNN      | TAAGATTCTT      |
| M00128 | V\$GATA1_04 | 0.83792<br>9       | 217  | (+) | NNCWGATARNNNN   | GTTTGATAGCTAA   |
| M00075 | V\$GATA1_01 | 0.85093<br>8       | 218  | (+) | SNNGATNNNN      | TTTGATAGCT      |
| M00076 | V\$GATA2_01 | 0.85701<br>4       | 218  | (+) | NNNGATRNNN      | TTTGATAGCT      |
| M00077 | V\$GATA3_01 | 0.83119<br>2       | 219  | (+) | NNGATARNG       | TTGATAGCT       |
| M00203 | V\$GATA_C   | 0.83814<br>8       | 220  | (+) | NGATAAGNMNN     | TGATAGCTAAC     |
| M00076 | V\$GATA2_01 | 0.84212<br>9       | 227  | (+) | NNNGATRNNN      | TAACATAGCT      |
| M00203 | V\$GATA_C   | 0.95433<br>4       | 238  | (-) | NGATAAGNMNN     | ATGATTTATCT     |

|        |             |                   |     |     |                |                |
|--------|-------------|-------------------|-----|-----|----------------|----------------|
| M00126 | V\$GATA1_02 | 0.7975<br>0.86452 | 239 | (-) | NNNNNGATANKGNN | TGATTTATCTCCTT |
| M00127 | V\$GATA1_03 | 7<br>0.89981      | 239 | (-) | RNSNNGATAANNGN | TGATTTATCTCCTT |
| M00128 | V\$GATA1_04 | 6<br>0.84649      | 239 | (-) | NNCWGATARNNNN  | TGATTTATCTCCT  |
| M00075 | V\$GATA1_01 | 6<br>0.86197      | 241 | (-) | SNNGATNNNN     | ATTTATCTCC     |
| M00076 | V\$GATA2_01 | 6<br>0.86397      | 241 | (-) | NNNGATRNNN     | ATTTATCTCC     |
| M00077 | V\$GATA3_01 | 9<br>0.81737      | 241 | (-) | NNGATARNG      | ATTTATCTC      |
| M00075 | V\$GATA1_01 | 4<br>0.82318      | 280 | (+) | SNNGATNNNN     | ACAGATGCTA     |
| M00076 | V\$GATA2_01 | 4<br>0.81700      | 280 | (+) | NNNGATRNNN     | ACAGATGCTA     |
| M00127 | V\$GATA1_03 | 1<br>0.87946      | 293 | (-) | RNSNNGATAANNGN | ATTGTTATACTGCT |
| M00203 | V\$GATA_C   | 6<br>0.84031      | 302 | (-) | NGATAAGNMNN    | CTGCTCTATCT    |
| M00126 | V\$GATA1_02 | 3<br>0.91421      | 303 | (-) | NNNNNGATANKGNN | TGCTCTATCTTATG |
| M00128 | V\$GATA1_04 | 6<br>0.83810      | 303 | (-) | NNCWGATARNNNN  | TGCTCTATCTTAT  |
| M00075 | V\$GATA1_01 | 5<br>0.90392      | 305 | (-) | SNNGATNNNN     | CTCTATCTTA     |
| M00076 | V\$GATA2_01 | 4<br>0.94195      | 305 | (-) | NNNGATRNNN     | CTCTATCTTA     |
| M00077 | V\$GATA3_01 | 8<br>0.85389      | 305 | (-) | NNGATARNG      | CTCTATCTT      |
| M00075 | V\$GATA1_01 | 9<br>0.87956      | 326 | (-) | SNNGATNNNN     | CACAATCTTA     |
| M00076 | V\$GATA2_01 | 7<br>0.92822      | 326 | (-) | NNNGATRNNN     | CACAATCTTA     |
| M00077 | V\$GATA3_01 | 3<br>0.82190      | 326 | (-) | NNGATARNG      | CACAATCTT      |
| M00127 | V\$GATA1_03 | 1<br>0.85192      | 346 | (-) | RNSNNGATAANNGN | GAGCTAATCATCAT |
| M00075 | V\$GATA1_01 | 5<br>0.82092      | 348 | (-) | SNNGATNNNN     | GCTAATCATC     |
| M00076 | V\$GATA2_01 | 9<br>0.83030      | 348 | (-) | NNNGATRNNN     | GCTAATCATC     |
| M00077 | V\$GATA3_01 | 6<br>0.88252      | 348 | (-) | NNGATARNG      | GCTAATCAT      |
| M00075 | V\$GATA1_01 | 7<br>0.84889      | 351 | (-) | SNNGATNNNN     | AATCATCATG     |
| M00076 | V\$GATA2_01 | 5<br>0.80108      | 351 | (-) | NNNGATRNNN     | AATCATCATG     |
| M00075 | V\$GATA1_01 | 6<br>0.80207      | 369 | (-) | SNNGATNNNN     | GAAAATCCAG     |
| M00075 | V\$GATA1_01 | 3<br>0.79348      | 406 | (-) | SNNGATNNNN     | CTGGATCACT     |
| M00127 | V\$GATA1_03 | 4<br>0.83162      | 410 | (-) | RNSNNGATAANNGN | ATCACTTTCCTCAT |
| M00203 | V\$GATA_C   | 5<br>0.82843      | 415 | (-) | NGATAAGNMNN    | TTTCCTCATCT    |
| M00128 | V\$GATA1_04 | 1<br>0.83711      | 416 | (-) | NNCWGATARNNNN  | TTCTCATCTGTT   |
| M00075 | V\$GATA1_01 | 7<br>0.84618      | 418 | (-) | SNNGATNNNN     | CCTCATCTGT     |
| M00076 | V\$GATA2_01 | 9<br>0.89499      | 418 | (-) | NNNGATRNNN     | CCTCATCTGT     |
| M00077 | V\$GATA3_01 | 3<br>0.82589      | 418 | (-) | NNGATARNG      | CCTCATCTG      |
| M00076 | V\$GATA2_01 | 1                 | 482 | (+) | NNNGATRNNN     | CAACATACCT     |

|        |             |              |     |     |                |                |
|--------|-------------|--------------|-----|-----|----------------|----------------|
| M00075 | V\$GATA1_01 | 0.91757<br>2 | 511 | (+) | SNNGATNNNN     | GCAGATGCTT     |
| M00076 | V\$GATA2_01 | 0.89986<br>5 | 511 | (+) | NNNGATRNNN     | GCAGATGCTT     |
| M00126 | V\$GATA1_02 | 0.81187<br>5 | 528 | (-) | NNNNNGATANKGNN | ACCACTATTTCTAT |
| M00127 | V\$GATA1_03 | 0.79078<br>9 | 528 | (-) | RNSNNGATAANNGN | ACCACTATTTCTAT |
| M00203 | V\$GATA_C   | 0.87356<br>3 | 546 | (-) | NGATAAGNMNN    | CTCATTTATCA    |
| M00126 | V\$GATA1_02 | 0.82187<br>5 | 547 | (-) | NNNNNGATANKGNN | TCATTTATCAACAT |
| M00127 | V\$GATA1_03 | 0.90004<br>9 | 547 | (-) | RNSNNGATAANNGN | TCATTTATCAACAT |
| M00128 | V\$GATA1_04 | 0.85508<br>6 | 547 | (-) | NNCWGATARNNNN  | TCATTTATCAACA  |
| M00075 | V\$GATA1_01 | 0.80256<br>7 | 549 | (-) | SNNGATNNNN     | ATTTATCAAC     |
| M00126 | V\$GATA1_02 | 0.77093<br>8 | 556 | (+) | NNNNNGATANKGNN | AACATGATATAAGC |
| M00127 | V\$GATA1_03 | 0.80548<br>8 | 556 | (+) | RNSNNGATAANNGN | AACATGATATAAGC |
| M00128 | V\$GATA1_04 | 0.86489<br>5 | 557 | (+) | NNCWGATARNNNN  | ACATGATATAAGC  |
| M00075 | V\$GATA1_01 | 0.82576<br>5 | 558 | (+) | SNNGATNNNN     | CATGATATAA     |
| M00076 | V\$GATA2_01 | 0.82228<br>2 | 558 | (+) | NNNGATRNNN     | CATGATATAA     |
| M00077 | V\$GATA3_01 | 0.82321<br>7 | 559 | (+) | NNGATARNG      | ATGATATAA      |
| M00203 | V\$GATA_C   | 0.84529<br>4 | 560 | (+) | NGATAAGNMNN    | TGATATAAGCA    |
| M00203 | V\$GATA_C   | 0.84653<br>6 | 589 | (-) | NGATAAGNMNN    | AATATTTGTCC    |
| M00126 | V\$GATA1_02 | 0.77281<br>3 | 629 | (-) | NNNNNGATANKGNN | TAAAATATCTTAAG |
| M00075 | V\$GATA1_01 | 0.81934<br>8 | 631 | (-) | SNNGATNNNN     | AAATATCTTA     |
| M00076 | V\$GATA2_01 | 0.89445<br>2 | 631 | (-) | NNNGATRNNN     | AAATATCTTA     |
| M00077 | V\$GATA3_01 | 0.83473<br>6 | 631 | (-) | NNGATARNG      | AAATATCTT      |
| M00203 | V\$GATA_C   | 0.92948<br>1 | 707 | (-) | NGATAAGNMNN    | TATATTTATCA    |
| M00127 | V\$GATA1_03 | 0.87971<br>6 | 708 | (-) | RNSNNGATAANNGN | ATATTTATCATCTT |
| M00128 | V\$GATA1_04 | 0.91329<br>7 | 708 | (-) | NNCWGATARNNNN  | ATATTTATCATCT  |
| M00075 | V\$GATA1_01 | 0.83859<br>8 | 710 | (-) | SNNGATNNNN     | ATTTATCATC     |
| M00076 | V\$GATA2_01 | 0.84258<br>2 | 710 | (-) | NNNGATRNNN     | ATTTATCATC     |
| M00077 | V\$GATA3_01 | 0.82321<br>7 | 710 | (-) | NNGATARNG      | ATTTATCAT      |
| M00076 | V\$GATA2_01 | 0.82138<br>7 | 713 | (-) | NNNGATRNNN     | TATCATCTTA     |
| M00077 | V\$GATA3_01 | 0.84492<br>7 | 713 | (-) | NNGATARNG      | TATCATCTT      |
| M00127 | V\$GATA1_03 | 0.78319<br>5 | 746 | (+) | RNSNNGATAANNGN | ATGCTTATAAAGTG |
| M00203 | V\$GATA_C   | 0.88816<br>4 | 768 | (-) | NGATAAGNMNN    | GTGCATTATCC    |
| M00126 | V\$GATA1_02 | 0.84437<br>5 | 769 | (-) | NNNNNGATANKGNN | TGCATTATCCTGTA |
| M00128 | V\$GATA1_04 | 0.82659<br>3 | 769 | (-) | NNCWGATARNNNN  | TGCATTATCCTGT  |

|        |             |         |      |     |                |                |
|--------|-------------|---------|------|-----|----------------|----------------|
|        |             | 0.86870 |      |     |                |                |
| M00075 | V\$GATA1_01 | 7       | 771  | (-) | SNNGATNNNN     | CATTATCCTG     |
|        |             | 0.91610 |      |     |                |                |
| M00076 | V\$GATA2_01 | 3       | 771  | (-) | NNNGATRNNN     | CATTATCCTG     |
|        |             | 0.88834 |      |     |                |                |
| M00077 | V\$GATA3_01 | 7       | 771  | (-) | NNGATARNG      | CATTATCCT      |
|        |             | 0.80468 |      |     |                |                |
| M00126 | V\$GATA1_02 | 8       | 792  | (-) | NNNNNGATANKGNN | AAGAATATCTGGGA |
|        |             | 0.88598 |      |     |                |                |
| M00075 | V\$GATA1_01 | 2       | 794  | (-) | SNNGATNNNN     | GAATATCTGG     |
|        |             | 0.90798 |      |     |                |                |
| M00076 | V\$GATA2_01 | 4       | 794  | (-) | NNNGATRNNN     | GAATATCTGG     |
|        |             | 0.82897 |      |     |                |                |
| M00077 | V\$GATA3_01 | 7       | 794  | (-) | NNGATARNG      | GAATATCTG      |
|        |             | 0.84106 |      |     |                |                |
| M00075 | V\$GATA1_01 | 6       | 801  | (+) | SNNGATNNNN     | TGGGATTCTT     |
|        |             |         |      |     |                |                |
| M00076 | V\$GATA2_01 | 0.86378 | 801  | (+) | NNNGATRNNN     | TGGGATTCTT     |
|        |             | 0.79906 |      |     |                |                |
| M00126 | V\$GATA1_02 | 3       | 816  | (+) | NNNNNGATANKGNN | GGAATGATAAATTA |
|        |             |         |      |     |                |                |
| M00127 | V\$GATA1_03 | 0.83121 | 816  | (+) | RNSNNGATAANNGN | GGAATGATAAATTA |
|        |             | 0.84926 |      |     |                |                |
| M00128 | V\$GATA1_04 | 5       | 817  | (+) | NNCWGATARNNNN  | GAATGATAAATTA  |
|        |             | 0.77393 |      |     |                |                |
| M00075 | V\$GATA1_01 | 9       | 818  | (+) | SNNGATNNNN     | AATGATAAAT     |
|        |             |         |      |     |                |                |
| M00076 | V\$GATA2_01 | 0.79567 | 818  | (+) | NNNGATRNNN     | AATGATAAAT     |
|        |             | 0.82321 |      |     |                |                |
| M00077 | V\$GATA3_01 | 7       | 819  | (+) | NNGATARNG      | ATGATAAAT      |
|        |             | 0.89344 |      |     |                |                |
| M00203 | V\$GATA_C   | 5       | 820  | (+) | NGATAAGNMNN    | TGATAAATTA     |
|        |             | 0.78845 |      |     |                |                |
| M00076 | V\$GATA2_01 | 3       | 842  | (-) | NNNGATRNNN     | GGCAATGCTA     |
|        |             | 0.77492 |      |     |                |                |
| M00075 | V\$GATA1_01 | 6       | 848  | (-) | SNNGATNNNN     | GCTAATCTTA     |
|        |             | 0.81777 |      |     |                |                |
| M00076 | V\$GATA2_01 | 2       | 848  | (-) | NNNGATRNNN     | GCTAATCTTA     |
|        |             | 0.85378 |      |     |                |                |
| M00077 | V\$GATA3_01 | 8       | 848  | (-) | NNGATARNG      | GCTAATCTT      |
|        |             | 0.80377 |      |     |                |                |
| M00127 | V\$GATA1_03 | 3       | 858  | (+) | RNSNNGATAANNGN | AGACAGAGAATAAT |
|        |             | 0.79103 |      |     |                |                |
| M00127 | V\$GATA1_03 | 4       | 905  | (+) | RNSNNGATAANNGN | GCAAAGATCACCAG |
|        |             | 0.87364 |      |     |                |                |
| M00075 | V\$GATA1_01 | 3       | 907  | (-) | SNNGATNNNN     | AAAGATCACC     |
|        |             | 0.79792 |      |     |                |                |
| M00076 | V\$GATA2_01 | 5       | 907  | (+) | NNNGATRNNN     | AAAGATCACC     |
|        |             | 0.84122 |      |     |                |                |
| M00076 | V\$GATA2_01 | 7       | 907  | (-) | NNNGATRNNN     | AAAGATCACC     |
|        |             | 0.82082 |      |     |                |                |
| M00075 | V\$GATA1_01 | 9       | 943  | (-) | SNNGATNNNN     | TAAAATCTTG     |
|        |             | 0.80920 |      |     |                |                |
| M00076 | V\$GATA2_01 | 2       | 943  | (-) | NNNGATRNNN     | TAAAATCTTG     |
|        |             | 0.83296 |      |     |                |                |
| M00077 | V\$GATA3_01 | 4       | 943  | (-) | NNGATARNG      | TAAAATCTT      |
|        |             | 0.82562 |      |     |                |                |
| M00126 | V\$GATA1_02 | 5       | 1076 | (+) | NNNNNGATANKGNN | GCATTGATACGTAG |
|        |             | 0.81357 |      |     |                |                |
| M00127 | V\$GATA1_03 | 2       | 1076 | (+) | RNSNNGATAANNGN | GCATTGATACGTAG |
|        |             |         |      |     |                |                |
| M00075 | V\$GATA1_01 | 0.82922 | 1078 | (+) | SNNGATNNNN     | ATTGATACGT     |
|        |             | 0.78664 |      |     |                |                |
| M00076 | V\$GATA2_01 | 9       | 1078 | (+) | NNNGATRNNN     | ATTGATACGT     |
|        |             | 0.85119 |      |     |                |                |
| M00203 | V\$GATA_C   | 6       | 1080 | (+) | NGATAAGNMNN    | TGATACGTAGT    |

|        |             |         |      |     |                |                 |
|--------|-------------|---------|------|-----|----------------|-----------------|
|        |             | 0.84032 |      |     |                |                 |
| M00203 | V\$GATA_C   | 3       | 1103 | (-) | NGATAAGNMNN    | GGGACTTATAT     |
|        |             | 0.80469 |      |     |                |                 |
| M00076 | V\$GATA2_01 | 1       | 1116 | (+) | NNNGATRNNN     | GGTCATAGTA      |
|        |             | 0.77218 |      |     |                |                 |
| M00126 | V\$GATA1_02 | 8       | 1126 | (+) | NNNNNGATANKGN  | TTAGAGATTGAGCT  |
| M00075 | V\$GATA1_01 | 0.83465 | 1128 | (+) | SNNGATNNNN     | AGAGATTGAG      |
|        |             | 0.81506 |      |     |                |                 |
| M00076 | V\$GATA2_01 | 5       | 1128 | (+) | NNNGATRNNN     | AGAGATTGAG      |
|        |             | 0.92556 |      |     |                |                 |
| M00077 | V\$GATA3_01 | 5       | 1129 | (+) | NNGATARNG      | GAGATTGAG       |
|        |             | 0.81293 |      |     |                |                 |
| M00075 | V\$GATA1_01 | 2       | 1143 | (+) | SNNGATNNNN     | GGGGATCTTA      |
|        |             | 0.77443 |      |     |                |                 |
| M00075 | V\$GATA1_01 | 2       | 1143 | (-) | SNNGATNNNN     | GGGGATCTTA      |
|        |             | 0.83716 |      |     |                |                 |
| M00076 | V\$GATA2_01 | 7       | 1143 | (+) | NNNGATRNNN     | GGGGATCTTA      |
|        |             | 0.85656 |      |     |                |                 |
| M00076 | V\$GATA2_01 | 3       | 1143 | (-) | NNNGATRNNN     | GGGGATCTTA      |
|        |             | 0.78035 |      |     |                |                 |
| M00075 | V\$GATA1_01 | 5       | 1152 | (-) | SNNGATNNNN     | AGAAATCAAA      |
|        |             | 0.82872 |      |     |                |                 |
| M00075 | V\$GATA1_01 | 7       | 1157 | (-) | SNNGATNNNN     | TCAAATCTTC      |
|        |             | 0.82092 |      |     |                |                 |
| M00076 | V\$GATA2_01 | 9       | 1157 | (-) | NNNGATRNNN     | TCAAATCTTC      |
|        |             | 0.85378 |      |     |                |                 |
| M00077 | V\$GATA3_01 | 8       | 1157 | (-) | NNGATARNG      | TCAAATCTT       |
|        |             | 0.82428 |      |     |                |                 |
| M00075 | V\$GATA1_01 | 4       | 1173 | (-) | SNNGATNNNN     | AAAAATCTCA      |
|        |             | 0.83806 |      |     |                |                 |
| M00076 | V\$GATA2_01 | 9       | 1173 | (-) | NNNGATRNNN     | AAAAATCTCA      |
|        |             | 0.79740 |      |     |                |                 |
| M00127 | V\$GATA1_03 | 3       | 1187 | (-) | RNSNNGATAANNGN | GTGGTTATTCTGTC  |
|        |             | 0.84550 |      |     |                |                 |
| M00075 | V\$GATA1_01 | 8       | 1207 | (+) | SNNGATNNNN     | AGTGATGTTC      |
|        |             | 0.82679 |      |     |                |                 |
| M00076 | V\$GATA2_01 | 3       | 1207 | (+) | NNNGATRNNN     | AGTGATGTTC      |
|        |             | 0.79657 |      |     |                |                 |
| M00076 | V\$GATA2_01 | 2       | 1240 | (-) | NNNGATRNNN     | GCCTGTCCCA      |
|        |             | 0.77147 |      |     |                |                 |
| M00075 | V\$GATA1_01 | 1       | 1258 | (+) | SNNGATNNNN     | TGGGATCAGC      |
|        |             | 0.85143 |      |     |                |                 |
| M00075 | V\$GATA1_01 | 1       | 1258 | (-) | SNNGATNNNN     | TGGGATCAGC      |
|        |             | 0.84032 |      |     |                |                 |
| M00076 | V\$GATA2_01 | 5       | 1258 | (+) | NNNGATRNNN     | TGGGATCAGC      |
|        |             | 0.84167 |      |     |                |                 |
| M00076 | V\$GATA2_01 | 8       | 1258 | (-) | NNNGATRNNN     | TGGGATCAGC      |
|        |             | 0.77147 |      |     |                |                 |
| M00075 | V\$GATA1_01 | 1       | 1280 | (+) | SNNGATNNNN     | TGGGATCAGC      |
|        |             | 0.85143 |      |     |                |                 |
| M00075 | V\$GATA1_01 | 1       | 1280 | (-) | SNNGATNNNN     | TGGGATCAGC      |
|        |             | 0.84032 |      |     |                |                 |
| M00076 | V\$GATA2_01 | 5       | 1280 | (+) | NNNGATRNNN     | TGGGATCAGC      |
|        |             | 0.84167 |      |     |                |                 |
| M00076 | V\$GATA2_01 | 8       | 1280 | (-) | NNNGATRNNN     | TGGGATCAGC      |
|        |             | 0.82337 |      |     |                |                 |
| M00127 | V\$GATA1_03 | 1       | 1293 | (-) | RNSNNGATAANNGN | CTTCTTGTCACCCAC |
|        |             | 0.79103 |      |     |                |                 |
| M00127 | V\$GATA1_03 | 4       | 1313 | (-) | RNSNNGATAANNGN | GTTCTTTTCACCTG  |
|        |             | 0.79702 |      |     |                |                 |
| M00076 | V\$GATA2_01 | 3       | 1338 | (-) | NNNGATRNNN     | CCTTATGAGG      |
|        |             | 0.78084 |      |     |                |                 |
| M00075 | V\$GATA1_01 | 9       | 1375 | (-) | SNNGATNNNN     | TGAAATCTGA      |
|        |             | 0.82724 |      |     |                |                 |
| M00076 | V\$GATA2_01 | 4       | 1375 | (-) | NNNGATRNNN     | TGAAATCTGA      |

|        |             |                 |      |     |                |                |
|--------|-------------|-----------------|------|-----|----------------|----------------|
| M00075 | V\$GATA1_01 | 0.80157<br>9    | 1380 | (+) | SNNGATNNNN     | TCTGATTTTA     |
| M00076 | V\$GATA2_01 | 0.79702<br>3    | 1380 | (+) | NNNGATRNNN     | TCTGATTTTA     |
| M00075 | V\$GATA1_01 | 0.78726<br>6    | 1391 | (+) | SNNGATNNNN     | AAAGATTCT      |
| M00076 | V\$GATA2_01 | 0.81641<br>9    | 1391 | (+) | NNNGATRNNN     | AAAGATTCT      |
| M00126 | V\$GATA1_02 | 0.80781<br>3    | 1414 | (+) | NNNNNGATANKGNN | TTTCTGATATGATT |
| M00128 | V\$GATA1_04 | 0.86764<br>7    | 1415 | (+) | NNCWGATARNNNN  | TTCTGATATGATT  |
| M00075 | V\$GATA1_01 | 0.83761<br>1    | 1416 | (+) | SNNGATNNNN     | TCTGATATGA     |
| M00076 | V\$GATA2_01 | 0.86783<br>9    | 1416 | (+) | NNNGATRNNN     | TCTGATATGA     |
| M00077 | V\$GATA3_01 | 0.85821<br>9    | 1417 | (+) | NNGATARNG      | CTGATATGA      |
| M00203 | V\$GATA_C   | 0.83814<br>8    | 1418 | (+) | NGATAAGNMNN    | TGATATGATTC    |
| M00075 | V\$GATA1_01 | 0.82280<br>4    | 1421 | (+) | SNNGATNNNN     | TATGATTCTC     |
| M00076 | V\$GATA2_01 | 0.82634<br>2    | 1421 | (+) | NNNGATRNNN     | TATGATTCTC     |
| M00075 | V\$GATA1_01 | 0.83168<br>8    | 1479 | (-) | SNNGATNNNN     | AAACATCATT     |
| M00076 | V\$GATA2_01 | 0.82228<br>2    | 1479 | (-) | NNNGATRNNN     | AAACATCATT     |
| M00126 | V\$GATA1_02 | 0.85937<br>5    | 1498 | (-) | NNNNNGATANKGNN | CACTGTATCTTTAT |
| M00127 | V\$GATA1_03 | 0.82484<br>1    | 1498 | (-) | RNSNNGATAANNGN | CACTGTATCTTTAT |
| M00075 | V\$GATA1_01 | 0.80404<br>7    | 1500 | (-) | SNNGATNNNN     | CTGTATCTTT     |
| M00076 | V\$GATA2_01 | 0.84618<br>9    | 1500 | (-) | NNNGATRNNN     | CTGTATCTTT     |
| M00077 | V\$GATA3_01 | 0.86265<br>8    | 1500 | (-) | NNGATARNG      | CTGTATCTT      |
| M00076 | V\$GATA2_01 | 0.82047<br>8    | 1527 | (+) | NNNGATRNNN     | TGACATAGCA     |
| M00127 | V\$GATA1_03 | 0.83856<br>1551 | 1551 | (+) | RNSNNGATAANNGN | AAGTGGATAAATTA |
| M00075 | V\$GATA1_01 | 0.77739<br>4    | 1553 | (+) | SNNGATNNNN     | GTGGATAAAT     |
| M00076 | V\$GATA2_01 | 0.78664<br>9    | 1553 | (+) | NNNGATRNNN     | GTGGATAAAT     |
| M00203 | V\$GATA_C   | 0.89064<br>9    | 1555 | (+) | NGATAAGNMNN    | GGATAAATTAA    |
| M00126 | V\$GATA1_02 | 0.81093<br>7    | 1582 | (+) | NNNNNGATANKGNN | TTATACATAGGGTC |
| M00076 | V\$GATA2_01 | 0.79431<br>7    | 1596 | (-) | NNNGATRNNN     | AATTATGCCA     |
| M00076 | V\$GATA2_01 | 0.82408<br>7    | 1612 | (-) | NNNGATRNNN     | TGGTATGCCC     |
| M00076 | V\$GATA2_01 | 0.80018<br>1647 | 1647 | (+) | NNNGATRNNN     | TAAGATTTTA     |
| M00077 | V\$GATA3_01 | 0.83296<br>4    | 1648 | (+) | NNGATARNG      | AAGATTTTA      |
| M00075 | V\$GATA1_01 | 0.82823<br>3    | 1710 | (-) | SNNGATNNNN     | ACTCATCGTA     |
| M00076 | V\$GATA2_01 | 0.85430<br>8    | 1710 | (-) | NNNGATRNNN     | ACTCATCGTA     |
| M00075 | V\$GATA1_01 | 0.79763<br>1    | 1741 | (-) | SNNGATNNNN     | ATGAATCTAC     |
| M00203 | V\$GATA_C   | 0.90090<br>1    | 1748 | (-) | NGATAAGNMNN    | TACTTTTATCA    |



|        |             |         |      |     |                |                |
|--------|-------------|---------|------|-----|----------------|----------------|
|        |             | 0.81531 |      |     |                |                |
| M00126 | V\$GATA1_02 | 3       | 1749 | (-) | NNNNNGATANKGNN | ACTTTTATCAGTCT |
|        |             | 0.90249 |      |     |                |                |
| M00127 | V\$GATA1_03 | 9       | 1749 | (-) | RNSNNGATAANNGN | ACTTTTATCAGTCT |
|        |             | 0.93045 |      |     |                |                |
| M00128 | V\$GATA1_04 | 3       | 1749 | (-) | NNCWGATARNNNN  | ACTTTTATCAGTC  |
|        |             | 0.84935 |      |     |                |                |
| M00077 | V\$GATA3_01 | 8       | 1751 | (-) | NNGATARNG      | TTTTATCAG      |
|        |             | 0.84405 |      |     |                |                |
| M00203 | V\$GATA_C   | 1       | 1775 | (-) | NGATAAGNMNN    | TCTAATTATCT    |
|        |             |         |      |     |                |                |
| M00126 | V\$GATA1_02 | 0.785   | 1776 | (-) | NNNNNGATANKGNN | CTAATTATCTGAAG |
|        |             | 0.81430 |      |     |                |                |
| M00127 | V\$GATA1_03 | 7       | 1776 | (-) | RNSNNGATAANNGN | CTAATTATCTGAAG |
|        |             | 0.92279 |      |     |                |                |
| M00128 | V\$GATA1_04 | 4       | 1776 | (-) | NNCWGATARNNNN  | CTAATTATCTGAA  |
|        |             | 0.82181 |      |     |                |                |
| M00075 | V\$GATA1_01 | 6       | 1778 | (-) | SNNGATNNNN     | AATTATCTGA     |
|        |             | 0.88768 |      |     |                |                |
| M00076 | V\$GATA2_01 | 6       | 1778 | (-) | NNNGATRNNN     | AATTATCTGA     |
|        |             | 0.86087 |      |     |                |                |
| M00077 | V\$GATA3_01 | 7       | 1778 | (-) | NNGATARNG      | AATTATCTG      |
|        |             | 0.84437 |      |     |                |                |
| M00126 | V\$GATA1_02 | 5       | 1784 | (+) | NNNNNGATANKGNN | CTGAAGATAATTTA |
|        |             | 0.87285 |      |     |                |                |
| M00127 | V\$GATA1_03 | 6       | 1784 | (+) | RNSNNGATAANNGN | CTGAAGATAATTTA |
|        |             | 0.83731 |      |     |                |                |
| M00128 | V\$GATA1_04 | 6       | 1785 | (+) | NNCWGATARNNNN  | TGAAGATAATTTA  |
|        |             | 0.85735 |      |     |                |                |
| M00075 | V\$GATA1_01 | 4       | 1786 | (+) | SNNGATNNNN     | GAAGATAATT     |
|        |             | 0.89400 |      |     |                |                |
| M00076 | V\$GATA2_01 | 1       | 1786 | (+) | NNNGATRNNN     | GAAGATAATT     |
|        |             | 0.86663 |      |     |                |                |
| M00077 | V\$GATA3_01 | 7       | 1787 | (+) | NNGATARNG      | AAGATAATT      |
|        |             |         |      |     |                |                |
| M00203 | V\$GATA_C   | 0.85803 | 1788 | (+) | NGATAAGNMNN    | AGATAATTTAA    |
|        |             | 0.79121 |      |     |                |                |
| M00075 | V\$GATA1_01 | 4       | 1820 | (+) | SNNGATNNNN     | TGTGATTATA     |
|        |             | 0.78213 |      |     |                |                |
| M00076 | V\$GATA2_01 | 8       | 1820 | (+) | NNNGATRNNN     | TGTGATTATA     |
|        |             | 0.85866 |      |     |                |                |
| M00077 | V\$GATA3_01 | 2       | 1821 | (+) | NNGATARNG      | GTGATTATA      |
|        |             | 0.82337 |      |     |                |                |
| M00127 | V\$GATA1_03 | 1       | 1821 | (+) | RNSNNGATAANNGN | GTGATTATAAGGAG |
|        |             | 0.79054 |      |     |                |                |
| M00127 | V\$GATA1_03 | 4       | 1821 | (-) | RNSNNGATAANNGN | GTGATTATAAGGAG |
|        |             | 0.80132 |      |     |                |                |
| M00127 | V\$GATA1_03 | 3       | 1848 | (-) | RNSNNGATAANNGN | TTAATTAGCTTCTT |
|        |             | 0.81063 |      |     |                |                |
| M00127 | V\$GATA1_03 | 2       | 1856 | (-) | RNSNNGATAANNGN | CTTCTGTCTATCT  |
|        |             | 0.85834 |      |     |                |                |
| M00203 | V\$GATA_C   | 1       | 1859 | (-) | NGATAAGNMNN    | CTTGTCTATCT    |
|        |             | 0.77468 |      |     |                |                |
| M00126 | V\$GATA1_02 | 7       | 1860 | (-) | NNNNNGATANKGNN | TTGTCTATCTCACA |
|        |             | 0.87959 |      |     |                |                |
| M00128 | V\$GATA1_04 | 6       | 1860 | (-) | NNCWGATARNNNN  | TTGTCTATCTCAC  |
|        |             | 0.84057 |      |     |                |                |
| M00075 | V\$GATA1_01 | 3       | 1862 | (-) | SNNGATNNNN     | GTCTATCTCA     |
|        |             | 0.89535 |      |     |                |                |
| M00076 | V\$GATA2_01 | 4       | 1862 | (-) | NNNGATRNNN     | GTCTATCTCA     |
|        |             | 0.89233 |      |     |                |                |
| M00077 | V\$GATA3_01 | 5       | 1862 | (-) | NNGATARNG      | GTCTATCTC      |
|        |             |         |      |     |                |                |
| M00076 | V\$GATA2_01 | 0.79161 | 1895 | (-) | NNNGATRNNN     | CTTCATCTTT     |
|        |             | 0.85999 |      |     |                |                |
| M00077 | V\$GATA3_01 | 1       | 1895 | (-) | NNGATARNG      | CTTCATCTT      |

|        |             |         |      |     |                |                |
|--------|-------------|---------|------|-----|----------------|----------------|
|        |             | 0.81161 |      |     |                |                |
| M00127 | V\$GATA1_03 | 2       | 1899 | (-) | RNSNNGATAANNGN | ATCTTTACCTGCCT |
|        |             | 0.81280 |      |     |                |                |
| M00128 | V\$GATA1_04 | 6       | 1899 | (-) | NNCWGATARNNNN  | ATCTTTACCTGCC  |
|        |             | 0.77591 |      |     |                |                |
| M00075 | V\$GATA1_01 | 3       | 1917 | (+) | SNNGATNNNN     | GCTGTTGCCC     |
|        |             | 0.78368 |      |     |                |                |
| M00127 | V\$GATA1_03 | 4       | 1938 | (+) | RNSNNGATAANNGN | GTAAGTATAATAAG |
|        |             | 0.79562 |      |     |                |                |
| M00126 | V\$GATA1_02 | 5       | 1946 | (+) | NNNNNGATANKGNN | AATAAGATACAGAT |
|        |             | 0.85631 |      |     |                |                |
| M00128 | V\$GATA1_04 | 1       | 1947 | (+) | NNCWGATARNNNN  | ATAAGATACAGAT  |
|        |             | 0.81243 |      |     |                |                |
| M00075 | V\$GATA1_01 | 8       | 1948 | (+) | SNNGATNNNN     | TAAGATACAG     |
|        |             | 0.87866 |      |     |                |                |
| M00076 | V\$GATA2_01 | 5       | 1948 | (+) | NNNGATRNNN     | TAAGATACAG     |
|        |             |         |      |     |                |                |
| M00077 | V\$GATA3_01 | 0.86265 | 1949 | (+) | NNGATARNG      | AAGATACAG      |
|        |             | 0.85368 |      |     |                |                |
| M00203 | V\$GATA_C   | 1       | 1950 | (+) | NGATAAGNMNN    | AGATACAGATG    |
|        |             | 0.80083 |      |     |                |                |
| M00127 | V\$GATA1_03 | 3       | 1952 | (+) | RNSNNGATAANNGN | ATACAGATGAGAAT |
|        |             |         |      |     |                |                |
| M00128 | V\$GATA1_04 | 0.81587 | 1953 | (+) | NNCWGATARNNNN  | TACAGATGAGAAT  |
|        |             | 0.79022 |      |     |                |                |
| M00075 | V\$GATA1_01 | 7       | 1954 | (+) | SNNGATNNNN     | ACAGATGAGA     |
|        |             | 0.80333 |      |     |                |                |
| M00076 | V\$GATA2_01 | 8       | 1954 | (+) | NNNGATRNNN     | ACAGATGAGA     |
|        |             | 0.85999 |      |     |                |                |
| M00077 | V\$GATA3_01 | 1       | 1955 | (+) | NNGATARNG      | CAGATGAGA      |
|        |             | 0.78417 |      |     |                |                |
| M00127 | V\$GATA1_03 | 4       | 1973 | (+) | RNSNNGATAANNGN | GTAAATATAAGAAT |
|        |             | 0.78221 |      |     |                |                |
| M00127 | V\$GATA1_03 | 5       | 1993 | (-) | RNSNNGATAANNGN | TTGTTTATAAGGAT |
|        |             | 0.84031 |      |     |                |                |
| M00126 | V\$GATA1_02 | 3       | 1999 | (+) | NNNNNGATANKGNN | ATAAGGATAATGTC |
|        |             | 0.88853 |      |     |                |                |
| M00127 | V\$GATA1_03 | 5       | 1999 | (+) | RNSNNGATAANNGN | ATAAGGATAATGTC |
|        |             | 0.79960 |      |     |                |                |
| M00075 | V\$GATA1_01 | 5       | 2001 | (+) | SNNGATNNNN     | AAGGATAATG     |
|        |             | 0.87460 |      |     |                |                |
| M00076 | V\$GATA2_01 | 5       | 2001 | (+) | NNNGATRNNN     | AAGGATAATG     |
|        |             | 0.88834 |      |     |                |                |
| M00077 | V\$GATA3_01 | 7       | 2002 | (+) | NNGATARNG      | AGGATAATG      |
|        |             | 0.86331 |      |     |                |                |
| M00203 | V\$GATA_C   | 2       | 2003 | (+) | NGATAAGNMNN    | GGATAATGTCA    |
|        |             | 0.82361 |      |     |                |                |
| M00127 | V\$GATA1_03 | 6       | 2015 | (+) | RNSNNGATAANNGN | GGGTAGACAGCAGG |
|        |             | 0.78093 |      |     |                |                |
| M00126 | V\$GATA1_02 | 8       | 2029 | (+) | NNNNNGATANKGNN | GAATAGAGAGGGAG |
|        |             | 0.83429 |      |     |                |                |
| M00077 | V\$GATA3_01 | 3       | 2032 | (+) | NNGATARNG      | TAGAGAGGG      |
|        |             | 0.78515 |      |     |                |                |
| M00127 | V\$GATA1_03 | 4       | 2100 | (+) | RNSNNGATAANNGN | ATGAAGATGGACAA |
|        |             | 0.86821 |      |     |                |                |
| M00075 | V\$GATA1_01 | 3       | 2102 | (+) | SNNGATNNNN     | GAAGATGGAC     |
|        |             | 0.87325 |      |     |                |                |
| M00076 | V\$GATA2_01 | 2       | 2102 | (+) | NNNGATRNNN     | GAAGATGGAC     |
|        |             | 0.82144 |      |     |                |                |
| M00077 | V\$GATA3_01 | 4       | 2103 | (+) | NNGATARNG      | AAGATGGAC      |
|        |             |         |      |     |                |                |
| M00203 | V\$GATA_C   | 0.83908 | 2108 | (+) | NGATAAGNMNN    | GGACAAAAATA    |
|        |             | 0.80867 |      |     |                |                |
| M00127 | V\$GATA1_03 | 2       | 2129 | (-) | RNSNNGATAANNGN | AGTGTTCCTCCTCT |
|        |             | 0.81490 |      |     |                |                |
| M00075 | V\$GATA1_01 | 6       | 2142 | (+) | SNNGATNNNN     | TAGGATTGGA     |

|        |             |                 |      |     |                             |                        |
|--------|-------------|-----------------|------|-----|-----------------------------|------------------------|
| M00076 | V\$GATA2_01 | 0.85746<br>5    | 2142 | (+) | NNNGATRNNN                  | TAGGATTGGA             |
| M00077 | V\$GATA3_01 | 0.86885<br>2    | 2143 | (+) | NNGATARNG                   | AGGATTGGA              |
| M00075 | V\$GATA1_01 | 0.85784<br>8    | 2231 | (-) | SNNGATNNNN                  | AAGAATCACT             |
| M00076 | V\$GATA2_01 | 0.80559<br>3    | 2231 | (-) | NNNGATRNNN                  | AAGAATCACT             |
| M00075 | V\$GATA1_01 | 0.82231<br>2311 | 2311 | (+) | SNNGATNNNN                  | GTAGATTCCC             |
| M00076 | V\$GATA2_01 | 0.78935<br>5    | 2311 | (+) | NNNGATRNNN                  | GTAGATTCCC             |
| M00076 | V\$GATA2_01 | 0.79747<br>4    | 2333 | (-) | NNNGATRNNN                  | GCATATGTCA             |
| M00075 | V\$GATA1_01 | 0.77640<br>7    | 2379 | (+) | SNNGATNNNN                  | AAGGATCCTT             |
| M00075 | V\$GATA1_01 | 0.77640<br>7    | 2379 | (-) | SNNGATNNNN                  | AAGGATCCTT             |
| M00076 | V\$GATA2_01 | 0.82318<br>4    | 2379 | (+) | NNNGATRNNN                  | AAGGATCCTT             |
| M00076 | V\$GATA2_01 | 0.82318<br>4    | 2379 | (-) | NNNGATRNNN                  | AAGGATCCTT             |
| M00075 | V\$GATA1_01 | 0.84402<br>8    | 2393 | (+) | SNNGATNNNN                  | AATGATGTGT             |
| M00076 | V\$GATA2_01 | 0.82859<br>7    | 2393 | (+) | NNNGATRNNN                  | AATGATGTGT             |
| M00075 | V\$GATA1_01 | 0.80108<br>6    | 2421 | (+) | SNNGATNNNN                  | GGAGTTGGGC             |
| M00075 | V\$GATA1_01 | 0.85389<br>9    | 2483 | (-) | SNNGATNNNN                  | CTCCATCCCT             |
| M00076 | V\$GATA2_01 | 0.86558<br>4    | 2483 | (-) | NNNGATRNNN                  | CTCCATCCCT             |
| M00077 | V\$GATA3_01 | 0.86043<br>4    | 2483 | (-) | NNGATARNG                   | CTCCATCCC              |
| M00127 | V\$GATA1_03 | 0.78613<br>4    | 2498 | (+) | RNSNNGATAANNGN              | AGGAAGATCCCATG         |
| M00075 | V\$GATA1_01 | 0.80997<br>2500 | 2500 | (+) | SNNGATNNNN                  | GAAGATCCCA             |
| M00075 | V\$GATA1_01 | 0.77739<br>4    | 2500 | (-) | SNNGATNNNN                  | GAAGATCCCA             |
| M00076 | V\$GATA2_01 | 0.84483<br>5    | 2500 | (+) | NNNGATRNNN                  | GAAGATCCCA             |
| M00076 | V\$GATA2_01 | 0.84889<br>5    | 2500 | (-) | NNNGATRNNN                  | GAAGATCCCA             |
| M00136 | V\$OCT1_02  | 0.78451<br>5    | 41   | (+) | NNGAATATKCANNNN             | AGAGATATTCATTG         |
| M00162 | V\$OCT1_06  | 0.87812<br>5    | 44   | (-) | CWNAWTKWSATRYN              | GATATTCATTGCC          |
| M00137 | V\$OCT1_03  | 0.84907<br>2    | 86   | (+) | NNNRTAATNANNN               | GAGGTAATATTTT          |
| M00138 | V\$OCT1_04  | 0.87871<br>2    | 87   | (-) | NNNNNNNWATGCAAATNNNW<br>NNW | AGGTAATATTTTCATTTATCTT |
| M00135 | V\$OCT1_01  | 0.78882<br>1    | 89   | (-) | NNNNWTATGCAAATNTNNN         | GTAATATTTTCATTTATCT    |
| M00162 | V\$OCT1_06  | 0.9375<br>91    | 91   | (+) | CWNAWTKWSATRYN              | AATATTTTCATTTA         |
| M00195 | V\$OCT1_Q6  | 0.82232<br>5    | 91   | (-) | NNNNATGCAAATNAN             | AATATTTTCATTTAT        |
| M00248 | V\$OCT1_07  | 0.81238<br>1    | 91   | (+) | TNTATGNTAATT                | AATATTTTCATT           |
| M00138 | V\$OCT1_04  | 0.80593<br>9    | 93   | (-) | NNNNNNNWATGCAAATNNNW<br>NNW | TATTTTCATTTATCTTTTGTGA |
| M00162 | V\$OCT1_06  | 0.80546<br>9    | 104  | (+) | CWNAWTKWSATRYN              | ATCTTTTGTATT           |
| M00162 | V\$OCT1_06  | 0.85273<br>4    | 106  | (+) | CWNAWTKWSATRYN              | CTTTTGTATTCT           |

|        |            |                    |     |     |                      |                         |
|--------|------------|--------------------|-----|-----|----------------------|-------------------------|
| M00162 | V\$OCT1_06 | 0.83437<br>5       | 123 | (+) | CWNAWTKWSATRYN       | TACCTTGTAATATT          |
| M00162 | V\$OCT1_06 | 0.80664<br>1       | 124 | (-) | CWNAWTKWSATRYN       | ACCTTGTAATATTG          |
| M00137 | V\$OCT1_03 | 0.88463<br>1       | 126 | (+) | NNNRTAATNANNN        | CTTGTAATATTGT           |
| M00138 | V\$OCT1_04 | 0.80447<br>5       | 127 | (+) | NNNNNNNWATGCAAATNNNW | TTGTAATATTGTAAAACCTAATA |
| M00162 | V\$OCT1_06 | 0.82656<br>2       | 131 | (+) | CWNAWTKWSATRYN       | AATATTGTAAAACC          |
| M00138 | V\$OCT1_04 | 0.78690<br>9       | 163 | (-) | NNNNNNNWATGCAAATNNNW | AAGTATTTTTTAAAGAACTAAT  |
| M00162 | V\$OCT1_06 | 0.82890<br>6       | 230 | (-) | CWNAWTKWSATRYN       | CATAGCTAATGATT          |
| M00137 | V\$OCT1_03 | 0.88897<br>7       | 232 | (+) | NNNRTAATNANNN        | TAGCTAATGATTT           |
| M00138 | V\$OCT1_04 | 0.84776<br>2       | 265 | (-) | NNNNNNNWATGCAAATNNNW | TAAAAAAATTAACATACAGATGC |
| M00135 | V\$OCT1_01 | 0.85864<br>2       | 267 | (-) | NNNNWTATGCAAATNTNNN  | AAAAAATTAACATACAGAT     |
| M00162 | V\$OCT1_06 | 0.88125<br>0.79213 | 269 | (+) | CWNAWTKWSATRYN       | AAAATTAACATACA          |
| M00138 | V\$OCT1_04 | 7                  | 270 | (+) | NNNNNNNWATGCAAATNNNW | AAATTAACATACAGATGCTAGAA |
| M00248 | V\$OCT1_07 | 0.99321<br>6       | 271 | (-) | TNTATGNTAATT         | AATTAACATACA            |
| M00162 | V\$OCT1_06 | 0.87343<br>7       | 290 | (+) | CWNAWTKWSATRYN       | GAAATTGTTATACT          |
| M00162 | V\$OCT1_06 | 0.80429<br>7       | 306 | (-) | CWNAWTKWSATRYN       | TCTATCTTATGATG          |
| M00162 | V\$OCT1_06 | 0.80156<br>2       | 313 | (+) | CWNAWTKWSATRYN       | TATGATGAAATGCC          |
| M00162 | V\$OCT1_06 | 0.81640<br>6       | 319 | (-) | CWNAWTKWSATRYN       | GAAATGCCACAATC          |
| M00162 | V\$OCT1_06 | 0.80468<br>7       | 326 | (+) | CWNAWTKWSATRYN       | CACAATCTTATTTT          |
| M00137 | V\$OCT1_03 | 0.84393<br>5       | 346 | (+) | NNNRTAATNANNN        | GAGCTAATCATCA           |
| M00162 | V\$OCT1_06 | 0.85507<br>8       | 354 | (+) | CWNAWTKWSATRYN       | CATCATGAGGTTTT          |
| M00135 | V\$OCT1_01 | 0.73407<br>1       | 361 | (+) | NNNNWTATGCAAATNTNNN  | AGGTTTTTGAAAATCCAGG     |
| M00136 | V\$OCT1_02 | 0.78505<br>7       | 364 | (-) | NNGAATATKCANNNN      | TTTTTGAAAATCCAG         |
| M00162 | V\$OCT1_06 | 0.86289<br>1       | 385 | (+) | CWNAWTKWSATRYN       | GCACATTAGATGTA          |
| M00162 | V\$OCT1_06 | 0.82148<br>4       | 386 | (-) | CWNAWTKWSATRYN       | CACATTAGATGTAT          |
| M00137 | V\$OCT1_03 | 0.86645<br>6       | 424 | (+) | NNNRTAATNANNN        | CTGTAAATCAGAC           |
| M00138 | V\$OCT1_04 | 0.78000<br>8       | 470 | (-) | NNNNNNNWATGCAAATNNNW | AGAAAGAATTTACAACATACCTA |
| M00135 | V\$OCT1_01 | 0.75200<br>3       | 502 | (-) | NNNNWTATGCAAATNTNNN  | CTGACAATAGCAGATGCTT     |
| M00138 | V\$OCT1_04 | 0.84504<br>4       | 557 | (-) | NNNNNNNWATGCAAATNNNW | ACATGATATAAGCATTTCTTTAA |
| M00135 | V\$OCT1_01 | 0.76554<br>8       | 559 | (-) | NNNNWTATGCAAATNTNNN  | ATGATATAAGCATTTCTTT     |
| M00162 | V\$OCT1_06 | 0.85507<br>8       | 567 | (-) | CWNAWTKWSATRYN       | AGCATTTCTTTAAC          |
| M00138 | V\$OCT1_04 | 0.78753<br>7       | 573 | (-) | NNNNNNNWATGCAAATNNNW | TCITTAACCTTAGTTAATATTT  |
| M00136 | V\$OCT1_02 | 0.77666<br>5       | 583 | (-) | NNGAATATKCANNNN      | TTAGTTAATATTGT          |
| M00136 | V\$OCT1_02 | 0.78397<br>4       | 586 | (+) | NNGAATATKCANNNN      | GTTAATATTTGTCCA         |

|        |            |              |     |     |                       |                         |
|--------|------------|--------------|-----|-----|-----------------------|-------------------------|
| M00162 | V\$OCT1_06 | 0.80078<br>1 | 599 | (-) | CWNAWTKWSATRYN        | CATGTTCCAGTTTC          |
| M00162 | V\$OCT1_06 | 0.83437<br>5 | 608 | (+) | CWNAWTKWSATRYN        | GTTTCTTTCATCCA          |
| M00138 | V\$OCT1_04 | 0.84023<br>4 | 613 | (+) | NNNNNNNNWATGCAAATNNNW | TTTCATCCATGGAAAATAAAATA |
| M00248 | V\$OCT1_07 | 0.82001<br>3 | 618 | (+) | TNTATGNTAATT          | TCCATGGAAAAAT           |
| M00162 | V\$OCT1_06 | 0.85546<br>9 | 624 | (+) | CWNAWTKWSATRYN        | GAAAATAAAATATC          |
| M00162 | V\$OCT1_06 | 0.81367<br>2 | 624 | (-) | CWNAWTKWSATRYN        | GAAAATAAAATATC          |
| M00162 | V\$OCT1_06 | 0.82148<br>4 | 625 | (-) | CWNAWTKWSATRYN        | AAAATAAAATATCT          |
| M00248 | V\$OCT1_07 | 0.79860<br>1 | 626 | (-) | TNTATGNTAATT          | AAATAAAATATC            |
| M00135 | V\$OCT1_01 | 0.74093<br>9 | 634 | (+) | NNNNWTATGCAAATNTNNN   | TATCTTAAGTAAAATTGAG     |
| M00138 | V\$OCT1_04 | 0.78042<br>7 | 655 | (+) | NNNNNNNNWATGCAAATNNNW | AAGTGGCTATATATAATGAAGTT |
| M00162 | V\$OCT1_06 | 0.85507<br>8 | 662 | (-) | CWNAWTKWSATRYN        | TATATATAATGAAC          |
| M00137 | V\$OCT1_03 | 0.87238<br>2 | 664 | (+) | NNNRATAATNANNN        | TATATAATGAAGT           |
| M00138 | V\$OCT1_04 | 0.78523<br>6 | 670 | (+) | NNNNNNNNWATGCAAATNNNW | ATGAAGTTATTTCAAAAATTTAA |
| M00138 | V\$OCT1_04 | 0.85507<br>6 | 670 | (+) | NNNNNNNNWATGCAAATNNNW | TGAAGTTATTTCAAAAATTTAAA |
| M00162 | V\$OCT1_06 | 0.81367<br>2 | 675 | (-) | CWNAWTKWSATRYN        | CTTATTTCAAAAAT          |
| M00162 | V\$OCT1_06 | 0.82617<br>2 | 677 | (-) | CWNAWTKWSATRYN        | TATTTCAAAAATTT          |
| M00138 | V\$OCT1_04 | 0.87411<br>1 | 679 | (+) | NNNNNNNNWATGCAAATNNNW | TTTCAAAAATTTAAATTATAAAA |
| M00138 | V\$OCT1_04 | 0.86344<br>6 | 680 | (-) | NNNNNNNNWATGCAAATNNNW | TTCAAAAATTTAAATTATAAAAT |
| M00135 | V\$OCT1_01 | 0.73960<br>3 | 682 | (-) | NNNNWTATGCAAATNTNNN   | CAAAAATTTAAATTATAAA     |
| M00162 | V\$OCT1_06 | 0.83437<br>5 | 683 | (+) | CWNAWTKWSATRYN        | AAAAATTTAAATTA          |
| M00195 | V\$OCT1_Q6 | 0.84825<br>3 | 683 | (+) | NNNNATGCAAATNAN       | AAAAATTTAAATTAT         |
| M00162 | V\$OCT1_06 | 0.84765<br>6 | 684 | (+) | CWNAWTKWSATRYN        | AAAATTTAAATTAT          |
| M00162 | V\$OCT1_06 | 0.91679<br>7 | 684 | (-) | CWNAWTKWSATRYN        | AAAATTTAAATTAT          |
| M00248 | V\$OCT1_07 | 0.83230<br>9 | 684 | (+) | TNTATGNTAATT          | AAAATTTAAATT            |
| M00138 | V\$OCT1_04 | 0.79192<br>8 | 685 | (+) | NNNNNNNNWATGCAAATNNNW | AAATTTAAATTATAAAATTTAAT |
| M00138 | V\$OCT1_04 | 0.78356<br>3 | 686 | (-) | NNNNNNNNWATGCAAATNNNW | AATTTAAATTATAAAATTTAATA |
| M00248 | V\$OCT1_07 | 0.83230<br>9 | 686 | (-) | TNTATGNTAATT          | AATTTAAATTAT            |
| M00137 | V\$OCT1_03 | 0.84512<br>1 | 688 | (-) | NNNRATAATNANNN        | TTTAAATTATAAA           |
| M00162 | V\$OCT1_06 | 0.81367<br>2 | 690 | (-) | CWNAWTKWSATRYN        | TAAATTATAAAATT          |
| M00162 | V\$OCT1_06 | 0.82929<br>7 | 692 | (+) | CWNAWTKWSATRYN        | AATTATAAAATTTA          |
| M00138 | V\$OCT1_04 | 0.78063<br>6 | 693 | (-) | NNNNNNNNWATGCAAATNNNW | ATTATAAAATTTAATATATTTAT |
| M00138 | V\$OCT1_04 | 0.81409<br>5 | 695 | (-) | NNNNNNNNWATGCAAATNNNW | TATAAAATTTAATATATTTATCA |
| M00135 | V\$OCT1_01 | 0.75581<br>8 | 697 | (-) | NNNNWTATGCAAATNTNNN   | TAAAATTTAATATATTTAT     |

|        |            |                    |     |     |                                          |                           |
|--------|------------|--------------------|-----|-----|------------------------------------------|---------------------------|
| M00162 | V\$OCT1_06 | 0.88125<br>0.89843 | 697 | (+) | CWNAWTKWSATRYN                           | TAAAAATTTAATATA           |
| M00162 | V\$OCT1_06 | 7<br>0.79882       | 698 | (-) | CWNAWTKWSATRYN<br>NNNNNNNNWATGCAAATNNNW  | AAAATTTAATATAT            |
| M00138 | V\$OCT1_04 | 9<br>0.80949       | 701 | (-) | NNW<br>NNNNNNNNWATGCAAATNNNW             | ATTTAATATATTTATCATCTTAT   |
| M00138 | V\$OCT1_04 | 4<br>0.86566       | 704 | (-) | NNW                                      | TAATATATTTATCATCTTATTTT   |
| M00137 | V\$OCT1_03 | 6<br>0.85781       | 706 | (-) | NNNRTAATNANNN                            | ATATATTTATCAT             |
| M00162 | V\$OCT1_06 | 2<br>0.79276       | 719 | (+) | CWNAWTKWSATRYN<br>NNNNNNNNWATGCAAATNNNW  | CTTATTTTAAAACA            |
| M00138 | V\$OCT1_04 | 5<br>0.84765       | 725 | (-) | NNW                                      | TAAAAACATTGTCATTATGAAAT   |
| M00162 | V\$OCT1_06 | 6<br>0.81210       | 729 | (+) | CWNAWTKWSATRYN                           | AACATTGTCATTAT            |
| M00162 | V\$OCT1_06 | 9<br>0.95732       | 730 | (-) | CWNAWTKWSATRYN                           | ACATTGTCATTATG            |
| M00137 | V\$OCT1_03 | 9<br>0.95312       | 733 | (-) | NNNRTAATNANNN                            | TTGTCATTATGAA             |
| M00162 | V\$OCT1_06 | 5<br>0.83542       | 737 | (+) | CWNAWTKWSATRYN<br>NNNNNNNNWATGCAAATNNNW  | CATTATGAAATGCT            |
| M00138 | V\$OCT1_04 | 5<br>0.84218       | 738 | (+) | NNW                                      | ATTATGAAATGCTTATAAAGTGA   |
| M00162 | V\$OCT1_06 | 7<br>0.84393       | 738 | (-) | CWNAWTKWSATRYN                           | ATTATGAAATGCTT            |
| M00137 | V\$OCT1_03 | 5<br>0.82148       | 749 | (+) | NNNRTAATNANNN                            | CTTATAAAGTGAA             |
| M00162 | V\$OCT1_06 | 4<br>0.93242       | 752 | (+) | CWNAWTKWSATRYN                           | ATAAAGTGAATGTC            |
| M00162 | V\$OCT1_06 | 2                  | 757 | (+) | CWNAWTKWSATRYN                           | GTGAATGTCATGTG            |
| M00162 | V\$OCT1_06 | 0.85               | 758 | (-) | CWNAWTKWSATRYN                           | TGAATGTCATGTGC            |
| M00135 | V\$OCT1_01 | 0.76612<br>0.85090 | 761 | (-) | NNNNWTATGCAAATNTNNN                      | ATGTCATGTGCATTATCCT       |
| M00161 | V\$OCT1_05 | 5<br>0.80485       | 763 | (+) | MKNATTGTCATAYY                           | GTCATGTGCATTAT            |
| M00195 | V\$OCT1_Q6 | 8<br>0.82322       | 763 | (-) | NNNNATGCAAATNAN                          | GTCATGTGCATTATC           |
| M00136 | V\$OCT1_02 | 7<br>0.77043       | 765 | (-) | NNGAATATKCANNNN                          | CATGTGCATTATCCT           |
| M00136 | V\$OCT1_02 | 9<br>0.86992       | 789 | (-) | NNGAATATKCANNNN                          | AACAAGAATATCTGG           |
| M00162 | V\$OCT1_06 | 2<br>0.82726       | 796 | (+) | CWNAWTKWSATRYN<br>NNNNNNNNWATGCAAATNNNW  | ATATCTGGGATTCT            |
| M00138 | V\$OCT1_04 | 9<br>0.83164       | 811 | (+) | NNW                                      | TAGTAGGAATGATAAATTAATAA   |
| M00162 | V\$OCT1_06 | 1<br>0.80259       | 829 | (-) | CWNAWTKWSATRYN<br>NNNNNNNNWATGCAAATNNNW  | AATAACAAAAGCAG            |
| M00138 | V\$OCT1_04 | 3<br>0.77298       | 838 | (+) | NNW                                      | AGCAGGCAATGCTAATCTTAAGA   |
| M00135 | V\$OCT1_01 | 7<br>0.81795       | 840 | (+) | NNNNWTATGCAAATNTNNN                      | CAGGCAATGCTAATCTTAA       |
| M00195 | V\$OCT1_Q6 | 9<br>0.81492       | 842 | (+) | NNNNATGCAAATNAN                          | GGCAATGCTAATCTT           |
| M00248 | V\$OCT1_07 | 5<br>0.78586       | 843 | (+) | TNTATGNTAATT<br>NNNNNNNNWATGCAAATNNNW    | GCAATGCTAATC              |
| M00138 | V\$OCT1_04 | 4<br>0.80429       | 867 | (-) | NNW                                      | ATAATTTCCCATGCATACACATTCT |
| M00162 | V\$OCT1_06 | 7<br>0.82041       | 867 | (+) | CWNAWTKWSATRYN                           | ATAATTTCCCATGCA           |
| M00195 | V\$OCT1_Q6 | 5<br>0.79422       | 867 | (-) | NNNNATGCAAATNAN<br>NNNNNNNNWATGCAAATNNNW | ATAATTTCCCATGCAT          |
| M00138 | V\$OCT1_04 | 8                  | 868 | (+) | NNW                                      | TAATTTCCCATGCATACACATTCT  |

|        |            |         |      |     |                      |                         |
|--------|------------|---------|------|-----|----------------------|-------------------------|
|        |            | 0.84969 |      |     |                      |                         |
| M00248 | V\$OCT1_07 | 3       | 869  | (-) | TNTATGNTAATT         | AATTCCCATGCA            |
|        |            | 0.81212 |      |     |                      |                         |
| M00136 | V\$OCT1_02 | 8       | 873  | (-) | NNGAATATKCANNNN      | CCCATGCATACACAT         |
|        |            | 0.80937 |      |     |                      |                         |
| M00162 | V\$OCT1_06 | 5       | 886  | (-) | CWNAWTKWSATRYN       | ATTCTCTAAATTTG          |
|        |            | 0.84483 |      |     | NNNNNNNWATGCAAATNNNW |                         |
| M00138 | V\$OCT1_04 | 5       | 888  | (-) | NNW                  | TCTCTAAATTTGCACAGGCAAAG |
|        |            | 0.82392 |      |     |                      |                         |
| M00135 | V\$OCT1_01 | 2       | 890  | (-) | NNNNWTATGCAAATNTNNN  | TCTAAATTTGCACAGGCAA     |
|        |            | 0.83336 |      |     |                      |                         |
| M00248 | V\$OCT1_07 | 9       | 894  | (-) | TNTATGNTAATT         | AATTTGCACAGG            |
|        |            |         |      |     | NNNNNNNWATGCAAATNNNW |                         |
| M00138 | V\$OCT1_04 | 0.80343 | 895  | (+) | NNW                  | ATTTGCACAGGCAAAGATCACCA |
|        |            | 0.74265 |      |     |                      |                         |
| M00135 | V\$OCT1_01 | 5       | 897  | (+) | NNNNWTATGCAAATNTNNN  | TTGCACAGGCAAAGATCAC     |
|        |            | 0.81601 |      |     |                      |                         |
| M00162 | V\$OCT1_06 | 6       | 900  | (-) | CWNAWTKWSATRYN       | CACAGGCAAAGATC          |
|        |            | 0.81640 |      |     |                      |                         |
| M00162 | V\$OCT1_06 | 6       | 919  | (-) | CWNAWTKWSATRYN       | CAAATTTAACAATT          |
|        |            | 0.80907 |      |     | NNNNNNNWATGCAAATNNNW |                         |
| M00138 | V\$OCT1_04 | 6       | 928  | (+) | NNW                  | CAATTTTGAGTCAAATAAAATCT |
|        |            | 0.78711 |      |     | NNNNNNNWATGCAAATNNNW |                         |
| M00138 | V\$OCT1_04 | 8       | 950  | (-) | NNW                  | TTGCTGTTTAAAAATAATTGATT |
|        |            | 0.80820 |      |     |                      |                         |
| M00162 | V\$OCT1_06 | 3       | 961  | (+) | CWNAWTKWSATRYN       | AAATAATTGATTTC          |
|        |            | 0.82148 |      |     |                      |                         |
| M00162 | V\$OCT1_06 | 4       | 962  | (+) | CWNAWTKWSATRYN       | AATAATTGATTTCA          |
|        |            | 0.81493 |      |     | NNNNNNNWATGCAAATNNNW |                         |
| M00138 | V\$OCT1_04 | 1       | 963  | (+) | NNW                  | ATAATTGATTTCAAATTTGTAGA |
|        |            | 0.83984 |      |     |                      |                         |
| M00162 | V\$OCT1_06 | 4       | 968  | (-) | CWNAWTKWSATRYN       | TGATTTCAAATTTG          |
|        |            | 0.79778 |      |     | NNNNNNNWATGCAAATNNNW |                         |
| M00138 | V\$OCT1_04 | 3       | 970  | (-) | NNW                  | ATTTCAAATTTGTAGATCTATAG |
|        |            |         |      |     | NNNNNNNWATGCAAATNNNW |                         |
| M00138 | V\$OCT1_04 | 0.81054 | 971  | (+) | NNW                  | TTCAAATTTGTAGATCTATAGA  |
|        |            | 0.79053 |      |     |                      |                         |
| M00135 | V\$OCT1_01 | 8       | 972  | (-) | NNNNWTATGCAAATNTNNN  | TTCAAATTTGTAGATCTAT     |
|        |            | 0.78690 |      |     | NNNNNNNWATGCAAATNNNW |                         |
| M00138 | V\$OCT1_04 | 9       | 986  | (-) | NNW                  | TCTATAGAGTAAAATACTATTAT |
|        |            | 0.85499 |      |     |                      |                         |
| M00137 | V\$OCT1_03 | 8       | 999  | (-) | NNNRTAATNANNN        | ATACTATTATATG           |
|        |            | 0.95039 |      |     |                      |                         |
| M00162 | V\$OCT1_06 | 1       | 1006 | (-) | CWNAWTKWSATRYN       | TATATGTCAAAAAG          |
|        |            | 0.81328 |      |     |                      |                         |
| M00162 | V\$OCT1_06 | 1       | 1008 | (-) | CWNAWTKWSATRYN       | TATGTCAAAAAGTC          |
|        |            | 0.82036 |      |     | NNNNNNNWATGCAAATNNNW |                         |
| M00138 | V\$OCT1_04 | 8       | 1015 | (-) | NNW                  | AAAAGTCATTAGAATAACTTTAT |
|        |            | 0.77508 |      |     |                      |                         |
| M00135 | V\$OCT1_01 | 6       | 1017 | (-) | NNNNWTATGCAAATNTNNN  | AAGTCATTAGAATAACTTT     |
|        |            | 0.88028 |      |     |                      |                         |
| M00137 | V\$OCT1_03 | 4       | 1017 | (-) | NNNRTAATNANNN        | AAGTCATTAGAAT           |
|        |            | 0.85057 |      |     |                      |                         |
| M00161 | V\$OCT1_05 | 3       | 1019 | (+) | MKNATTTGCATAYY       | GTCATTAGAATAAC          |
|        |            | 0.80538 |      |     |                      |                         |
| M00248 | V\$OCT1_07 | 5       | 1021 | (-) | TNTATGNTAATT         | CATTAGAATAAC            |
|        |            | 0.80585 |      |     |                      |                         |
| M00162 | V\$OCT1_06 | 9       | 1028 | (+) | CWNAWTKWSATRYN       | ATAACTTTATTTC           |
|        |            | 0.84726 |      |     |                      |                         |
| M00162 | V\$OCT1_06 | 6       | 1032 | (+) | CWNAWTKWSATRYN       | CTTTATTTCACTTT          |
|        |            | 0.80859 |      |     |                      |                         |
| M00162 | V\$OCT1_06 | 4       | 1040 | (-) | CWNAWTKWSATRYN       | CACTTTTTCAGTTCT         |
|        |            | 0.78126 |      |     | NNNNNNNWATGCAAATNNNW |                         |
| M00138 | V\$OCT1_04 | 3       | 1065 | (-) | NNW                  | CTGAAAAAGTTGCATTGATACGT |
|        |            | 0.73044 |      |     |                      |                         |
| M00135 | V\$OCT1_01 | 6       | 1067 | (-) | NNNNWTATGCAAATNTNNN  | GGAAAAGTTGCATTGATAC     |

|        |            |         |      |                 |                       |                         |
|--------|------------|---------|------|-----------------|-----------------------|-------------------------|
|        |            | 0.82404 |      |                 |                       |                         |
| M00248 | V\$OCT1_07 | 1       | 1071 | (-)             | TNTATGNTAATT          | AAGTTGCATTGA            |
|        |            | 0.82968 |      |                 |                       |                         |
| M00162 | V\$OCT1_06 | 7       | 1103 | (+)             | CWNAWTKWSATRYN        | GGGACTTATATGTG          |
|        |            | 0.83984 |      |                 |                       |                         |
| M00162 | V\$OCT1_06 | 4       | 1122 | (-)             | CWNAWTKWSATRYN        | AGTATTAGAGATTG          |
|        |            | 0.80078 |      |                 |                       |                         |
| M00162 | V\$OCT1_06 | 1       | 1152 | (-)             | CWNAWTKWSATRYN        | AGAAATCAAATCTT          |
|        |            | 0.84218 |      |                 |                       |                         |
| M00162 | V\$OCT1_06 | 7       | 1153 | (-)             | CWNAWTKWSATRYN        | GAAATCAAATCTTC          |
|        |            | 0.85546 |      |                 |                       |                         |
| M00162 | V\$OCT1_06 | 9       | 1173 | (+)             | CWNAWTKWSATRYN        | AAAAATCTCATTTG          |
|        |            | 0.89453 |      |                 |                       |                         |
| M00162 | V\$OCT1_06 | 1       | 1174 | (-)             | CWNAWTKWSATRYN        | AAAATCTCATTTGG          |
|        |            | 0.78343 |      |                 |                       |                         |
| M00136 | V\$OCT1_02 | 3       | 1187 | (+)             | NNGAATATKCANNNN       | GTGGTTATTCTGTCA         |
|        |            | 0.80039 |      |                 |                       |                         |
| M00162 | V\$OCT1_06 | 1       | 1202 | (+)             | CWNAWTKWSATRYN        | GGTTCAGTGATGTT          |
|        |            | 0.82148 |      |                 |                       |                         |
| M00162 | V\$OCT1_06 | 4       | 1321 | (-)             | CWNAWTKWSATRYN        | CACCTGCCAATTCT          |
|        |            | 0.86825 |      |                 | NNNNNNNWWATGCAAATNNNW |                         |
| M00138 | V\$OCT1_04 | 6       | 1400 | (-)             | NNW                   | TGTTGTTTTTGCATTTCTGATA  |
|        |            | 0.79549 |      |                 |                       |                         |
| M00135 | V\$OCT1_01 | 8       | 1402 | (-)             | NNNNWTATGCAAATNTNNN   | TTGTTTTTGCATTTCTGA      |
|        |            | 0.87773 |      |                 |                       |                         |
| M00162 | V\$OCT1_06 | 4       | 1404 | (+)             | CWNAWTKWSATRYN        | GTTTTTGCATTC            |
|        |            | 0.89437 |      |                 |                       |                         |
| M00195 | V\$OCT1_Q6 | 8       | 1404 | (-)             | NNNNATGCAAATNAN       | GTTTTTGCATTTCT          |
|        |            | 0.80820 |      |                 |                       |                         |
| M00162 | V\$OCT1_06 | 3       | 1410 | (-)             | CWNAWTKWSATRYN        | TGCATTTCTGATAT          |
|        |            | 0.84765 |      |                 |                       |                         |
| M00162 | V\$OCT1_06 | 6       | 1428 | (+)             | CWNAWTKWSATRYN        | CTCCATAAGATTTA          |
|        |            | 0.80656 |      |                 | NNNNNNNWWATGCAAATNNNW |                         |
| M00138 | V\$OCT1_04 | 6       | 1440 | (+)             | NNW                   | TAAGAAGAATTGTAAAAAAAATA |
|        |            | 0.89843 |      |                 |                       |                         |
| M00162 | V\$OCT1_06 | 7       | 1460 | (+)             | CWNAWTKWSATRYN        | ATATATGGCATTTT          |
|        |            | 0.83281 |      |                 |                       |                         |
| M00162 | V\$OCT1_06 | 2       | 1461 | (-)             | CWNAWTKWSATRYN        | TATATGGCATTTTA          |
|        |            | 0.80093 |      |                 |                       |                         |
| M00248 | V\$OCT1_07 | 3       | 1461 | (+)             | TNTATGNTAATT          | TATATGGCATTT            |
|        |            | 0.78235 |      |                 |                       |                         |
| M00136 | V\$OCT1_02 | 1462    | (-)  | NNGAATATKCANNNN | ATATGGCATTTTAGT       |                         |
|        |            | 0.78195 |      |                 |                       |                         |
| M00135 | V\$OCT1_01 | 3       | 1466 | (-)             | NNNNWTATGCAAATNTNNN   | GGCATTTTAGTATAAACAT     |
|        |            | 0.80585 |      |                 |                       |                         |
| M00162 | V\$OCT1_06 | 9       | 1466 | (+)             | CWNAWTKWSATRYN        | GGCATTTTAGTATA          |
|        |            | 0.84692 |      |                 | NNNNNNNWWATGCAAATNNNW |                         |
| M00138 | V\$OCT1_04 | 6       | 1470 | (-)             | NNW                   | TTTAGTATAAACATCATTATTT  |
|        |            | 0.91821 |      |                 |                       |                         |
| M00137 | V\$OCT1_03 | 4       | 1481 | (-)             | NNNRTAATNANNN         | ACATCATTATTTT           |
|        |            | 0.82873 |      |                 | NNNNNNNWWATGCAAATNNNW |                         |
| M00138 | V\$OCT1_04 | 3       | 1483 | (-)             | NNW                   | ATCATTATTTTTCATCACTGTAT |
|        |            | 0.85894 |      |                 |                       |                         |
| M00137 | V\$OCT1_03 | 9       | 1502 | (-)             | NNNRTAATNANNN         | GTATCTTTATGTC           |
|        |            | 0.82148 |      |                 |                       |                         |
| M00162 | V\$OCT1_06 | 4       | 1522 | (+)             | CWNAWTKWSATRYN        | GTACCTGACATAGC          |
|        |            | 0.78649 |      |                 | NNNNNNNWWATGCAAATNNNW |                         |
| M00138 | V\$OCT1_04 | 1       | 1547 | (+)             | NNW                   | GAATAAGTGGATAAATTAATAAA |
|        |            | 0.79443 |      |                 | NNNNNNNWWATGCAAATNNNW |                         |
| M00138 | V\$OCT1_04 | 7       | 1553 | (+)             | NNW                   | GTGGATAAATTAATAAATAATTT |
|        |            | 0.79694 |      |                 | NNNNNNNWWATGCAAATNNNW |                         |
| M00138 | V\$OCT1_04 | 7       | 1557 | (+)             | NNW                   | ATAAATTAATAAATAATTTAGCT |
|        |            | 0.79351 |      |                 |                       |                         |
| M00248 | V\$OCT1_07 | 3       | 1560 | (-)             | TNTATGNTAATT          | AATTAATAAATA            |
|        |            | 0.81718 |      |                 |                       |                         |
| M00162 | V\$OCT1_06 | 7       | 1564 | (-)             | CWNAWTKWSATRYN        | AATAAATAATTTAG          |



|        |            |                 |      |     |                     |               |                         |
|--------|------------|-----------------|------|-----|---------------------|---------------|-------------------------|
| M00138 | V\$OCT1_04 | 0.80719<br>4    | 1565 | (-) | NNNNNNN             | WATGCAAATNNNW | ATAAATAATTTAGCTATTTATAC |
| M00162 | V\$OCT1_06 | 0.85234<br>4    | 1569 | (+) | CWNAWTKWSATRYN      | NNNNNNN       | ATAATTTAGCTATT          |
| M00138 | V\$OCT1_04 | 0.78356<br>3    | 1575 | (-) | NNNNNNN             | WATGCAAATNNNW | TAGCTATTTATACATAGGGTCAA |
| M00135 | V\$OCT1_01 | 0.73597<br>9    | 1594 | (+) | NNNNWTATGCAAATNTNNN | NNN           | TCAATTATGCCACTAATTT     |
| M00162 | V\$OCT1_06 | 0.83437<br>5    | 1613 | (-) | CWNAWTKWSATRYN      | NNNNNNN       | GGTATGCCCAAATG          |
| M00138 | V\$OCT1_04 | 0.80593<br>9    | 1637 | (+) | NNNNNNN             | WATGCAAATNNNW | ATTTAGAAATTAAGATTTTACAT |
| M00135 | V\$OCT1_01 | 0.73178<br>2    | 1640 | (-) | NNNNWTATGCAAATNTNNN | NNN           | TAGAAATTAAGATTTTACA     |
| M00162 | V\$OCT1_06 | 0.86054<br>7    | 1642 | (+) | CWNAWTKWSATRYN      | NNN           | GAAATTAAGATTTT          |
| M00162 | V\$OCT1_06 | 0.81367<br>2    | 1642 | (-) | CWNAWTKWSATRYN      | NNN           | GAAATTAAGATTTT          |
| M00248 | V\$OCT1_07 | 0.81810<br>5    | 1644 | (-) | TNTATGNTAATT        | NNNNNNN       | AATTAAGATTTT            |
| M00138 | V\$OCT1_04 | 0.82852<br>4    | 1645 | (-) | NNNNNNN             | WATGCAAATNNNW | ATTAAGATTTTACATTTCCTTCT |
| M00135 | V\$OCT1_01 | 0.73998<br>5    | 1647 | (-) | NNNNWTATGCAAATNTNNN | NNN           | TAAGATTTTACATTTCCTT     |
| M00162 | V\$OCT1_06 | 0.88554<br>7    | 1649 | (+) | CWNAWTKWSATRYN      | NNN           | AGATTTTACATTTC          |
| M00195 | V\$OCT1_Q6 | 0.82068<br>8    | 1649 | (-) | NNNNATGCAAATNAN     | NNN           | AGATTTTACATTTC          |
| M00162 | V\$OCT1_06 | 0.81367<br>2    | 1650 | (-) | CWNAWTKWSATRYN      | NNN           | GATTTTACATTTC           |
| M00162 | V\$OCT1_06 | 0.85<br>0.75104 | 1655 | (-) | CWNAWTKWSATRYN      | NNN           | TACATTTCCTTCTC          |
| M00135 | V\$OCT1_01 | 0.88554<br>9    | 1668 | (-) | NNNNWTATGCAAATNTNNN | NNN           | CCAGGTTTACATTTTGTT      |
| M00162 | V\$OCT1_06 | 0.82123<br>7    | 1670 | (+) | CWNAWTKWSATRYN      | NNN           | AGGTTTTACATTTT          |
| M00195 | V\$OCT1_Q6 | 0.86054<br>4    | 1670 | (-) | NNNNATGCAAATNAN     | NNN           | AGGTTTTACATTTTG         |
| M00162 | V\$OCT1_06 | 0.79025<br>7    | 1671 | (-) | CWNAWTKWSATRYN      | NNNNNNN       | GGTTTTACATTTTG          |
| M00138 | V\$OCT1_04 | 0.77069<br>5    | 1679 | (+) | NNNNNNN             | WATGCAAATNNNW | ATTTTGTGTGTTAATTTCTTCT  |
| M00135 | V\$OCT1_01 | 0.85732<br>8    | 1681 | (+) | NNNNWTATGCAAATNTNNN | NNN           | TTTGTGTGTTAATTTCTT      |
| M00248 | V\$OCT1_07 | 0.84788<br>5    | 1684 | (+) | TNTATGNTAATT        | NNN           | GTTGTGTTAATT            |
| M00137 | V\$OCT1_03 | 0.78157<br>6    | 1700 | (+) | NNNR                | TAAATNANNN    | CTTGTAAGAAGACT          |
| M00135 | V\$OCT1_01 | 0.78289<br>2    | 1713 | (+) | NNNNWTATGCAAATNTNNN | NNN           | CATCGTATTCAAATCCATG     |
| M00136 | V\$OCT1_02 | 0.81406<br>1    | 1713 | (+) | NNGAATATKCANNNN     | NNN           | CATCGTATTCAAATC         |
| M00162 | V\$OCT1_06 | 0.80039<br>2    | 1716 | (-) | CWNAWTKWSATRYN      | NNN           | CGTATTCAAATCCA          |
| M00162 | V\$OCT1_06 | 0.77504<br>1    | 1725 | (+) | CWNAWTKWSATRYN      | NNN           | ATCCATGTGTTTCT          |
| M00136 | V\$OCT1_02 | 0.8629<br>1     | 1738 | (-) | NNGAATATKCANNNN     | NNN           | TCAATGAATCTACTT         |
| M00137 | V\$OCT1_03 | 0.79860<br>8    | 1760 | (-) | NNNR                | TAAATNANNN    | TCTTCATTGCCCT           |
| M00248 | V\$OCT1_07 | 0.85420<br>1    | 1770 | (+) | TNTATGNTAATT        | NNN           | CCTTTTCTAATT            |
| M00137 | V\$OCT1_03 | 0.92137<br>8    | 1773 | (+) | NNNR                | TAAATNANNN    | TTTCTAATTATCT           |
| M00137 | V\$OCT1_03 | 5               | 1774 | (-) | NNNR                | TAAATNANNN    | TTCTAATTATCTG           |

|        |            |                    |      |     |                                             |                         |
|--------|------------|--------------------|------|-----|---------------------------------------------|-------------------------|
| M00138 | V\$OCT1_04 | 0.81618<br>6       | 1775 | (-) | NNNNNNNWATGCAAATNNNW<br>NNW                 | TCTAATTATCTGAAGATAATTTA |
| M00162 | V\$OCT1_06 | 0.9375<br>0.85696  | 1789 | (+) | CWNAWTKWSATRYN<br>NNNNNNNWATGCAAATNNNW      | GATAATTTAATACA          |
| M00138 | V\$OCT1_04 | 4<br>0.80859       | 1790 | (+) | NNW                                         | ATAATTTAATACATAATTAATGA |
| M00162 | V\$OCT1_06 | 4<br>0.86803       | 1790 | (-) | CWNAWTKWSATRYN                              | ATAATTTAATACAT          |
| M00137 | V\$OCT1_03 | 6<br>0.84788       | 1799 | (+) | NNNRTAATNANNN                               | TACATAATTAATG           |
| M00137 | V\$OCT1_03 | 6<br>0.87870       | 1800 | (-) | NNNRTAATNANNN                               | ACATAATTAATGA           |
| M00137 | V\$OCT1_03 | 4<br>0.89648       | 1803 | (+) | NNNRTAATNANNN                               | TAATTAATGAGGA           |
| M00137 | V\$OCT1_03 | 4<br>0.84726       | 1819 | (-) | NNNRTAATNANNN                               | GTGTGATTATAAG           |
| M00162 | V\$OCT1_06 | 6<br>0.84986       | 1847 | (+) | CWNAWTKWSATRYN                              | ATTAATTAGCTTCT          |
| M00137 | V\$OCT1_03 | 2<br>0.81601       | 1878 | (+) | NNNRTAATNANNN                               | AAAGTAAACATGA           |
| M00162 | V\$OCT1_06 | 6<br>0.86289       | 1883 | (+) | CWNAWTKWSATRYN                              | AAACATGAAGTTCT          |
| M00162 | V\$OCT1_06 | 1<br>0.89134       | 1884 | (-) | CWNAWTKWSATRYN                              | AACATGAAGTTCTT          |
| M00137 | V\$OCT1_03 | 7<br>0.86289       | 1897 | (-) | NNNRTAATNANNN                               | TCATCTTTACCTG           |
| M00162 | V\$OCT1_06 | 1<br>0.81113       | 1898 | (+) | CWNAWTKWSATRYN                              | CATCTTTACCTGCC          |
| M00195 | V\$OCT1_Q6 | 5<br>0.73616       | 1923 | (+) | NNNNATGCAAATNAN                             | GCCCTTGCAAAGAAT         |
| M00135 | V\$OCT1_01 | 9<br>0.87617       | 1930 | (+) | NNNNWTATGCAAATNTNNN                         | CAAAGAATGTAAGTATAAT     |
| M00162 | V\$OCT1_06 | 2<br>0.91465       | 1933 | (-) | CWNAWTKWSATRYN                              | AGAATGTAAGTATA          |
| M00137 | V\$OCT1_03 | 8                  | 1941 | (+) | NNNRTAATNANNN                               | AGTATAATAAGAT           |
| M00162 | V\$OCT1_06 | 0.825<br>0.73006   | 1943 | (+) | CWNAWTKWSATRYN                              | TATAATAAGATACA          |
| M00135 | V\$OCT1_01 | 5<br>0.88812       | 1953 | (-) | NNNNWTATGCAAATNTNNN<br>NNNNNNNWATGCAAATNNNW | TACAGATGAGAATATATTA     |
| M00138 | V\$OCT1_04 | 2<br>0.87275       | 1963 | (+) | NNW                                         | AATATATTATGTAAATATAAGAA |
| M00135 | V\$OCT1_01 | 8<br>0.83945       | 1965 | (+) | NNNNWTATGCAAATNTNNN                         | TATATTATGTAAATATAAG     |
| M00162 | V\$OCT1_06 | 3                  | 1968 | (+) | CWNAWTKWSATRYN                              | ATTATGTAAATATA          |
| M00162 | V\$OCT1_06 | 0.825<br>0.84714   | 1968 | (-) | CWNAWTKWSATRYN                              | ATTATGTAAATATA          |
| M00248 | V\$OCT1_07 | 9<br>0.78042       | 1968 | (+) | TNTATGNTAATT<br>NNNNNNNWATGCAAATNNNW        | ATTATGTAAATA            |
| M00138 | V\$OCT1_04 | 7<br>0.85144       | 1969 | (+) | NNW                                         | TTATGTAAATATAAGAATATTAA |
| M00137 | V\$OCT1_03 | 2<br>0.85738       | 1970 | (+) | NNNRTAATNANNN<br>NNNNNNNWATGCAAATNNNW       | TATGTAAATATAA           |
| M00138 | V\$OCT1_04 | 2<br>0.75028       | 1972 | (-) | NNW                                         | TGTAAATATAAGAATATTAAATT |
| M00135 | V\$OCT1_01 | 6<br>0.79548       | 1974 | (-) | NNNNWTATGCAAATNTNNN<br>NNNNNNNWATGCAAATNNNW | TAAATATAAGAATATTAAA     |
| M00138 | V\$OCT1_04 | 3                  | 1977 | (+) | NNW                                         | ATATAAGAATATTAAATTGTTA  |
| M00136 | V\$OCT1_02 | 0.86248<br>0.83865 | 1978 | (-) | NNGAATATKCANNNN                             | TATAAGAATATTAAA         |
| M00136 | V\$OCT1_02 | 7<br>0.82929       | 1981 | (+) | NNGAATATKCANNNN                             | AAGAATATTAAATTG         |
| M00162 | V\$OCT1_06 | 7                  | 1983 | (+) | CWNAWTKWSATRYN                              | GAATATTAAATTGT          |

|        |            |                    |      |     |                             |                         |
|--------|------------|--------------------|------|-----|-----------------------------|-------------------------|
| M00162 | V\$OCT1_06 | 0.92460<br>9       | 1984 | (-) | CWNAWTKWSATRYN              | AATATTAAATTGTT          |
| M00137 | V\$OCT1_03 | 0.85341<br>8       | 1991 | (-) | NNNRTAATNANNN               | AATTGTTTATAAG           |
| M00137 | V\$OCT1_03 | 0.85223<br>2       | 1996 | (+) | NNNRTAATNANNN               | TTTATAAGGATAA           |
| M00137 | V\$OCT1_03 | 0.84354<br>0.86645 | 2002 | (+) | NNNRTAATNANNN               | AGGATAATGTCAG           |
| M00137 | V\$OCT1_03 | 0.80585<br>6       | 2059 | (+) | NNNRTAATNANNN               | CCTATAATCAAAG           |
| M00162 | V\$OCT1_06 | 0.79530<br>9       | 2061 | (-) | CWNAWTKWSATRYN              | TATAATCAAAGACG          |
| M00135 | V\$OCT1_01 | 0.84765<br>7       | 2085 | (+) | NNNNWTATGCAAATNTNNN         | TGCCTTATGTAAGTTATGA     |
| M00162 | V\$OCT1_06 | 0.82170<br>6       | 2088 | (-) | CWNAWTKWSATRYN              | CTTATGTAAGTTAT          |
| M00248 | V\$OCT1_07 | 0.79903<br>9       | 2088 | (+) | TNTATGNTAATT                | CTTATGTAAGTT            |
| M00138 | V\$OCT1_04 | 0.80585<br>8       | 2154 | (+) | NNNNNNNWATGCAAATNNNW<br>NNW | GAGTTTTAGTTCAAAGTTAAAAA |
| M00162 | V\$OCT1_06 | 0.84218<br>9       | 2166 | (-) | CWNAWTKWSATRYN              | AAAGTTAAAAAACG          |
| M00162 | V\$OCT1_06 | 0.81131<br>7       | 2174 | (+) | CWNAWTKWSATRYN              | AAAACGTACATTTT          |
| M00136 | V\$OCT1_02 | 0.87277<br>6       | 2176 | (-) | NNGAATATKCANNNN             | AACGTACATTTTCTT         |
| M00137 | V\$OCT1_03 | 0.78523<br>8       | 2190 | (+) | NNNRTAATNANNN               | TCCGTAAACATTT           |
| M00138 | V\$OCT1_04 | 0.76726<br>6       | 2192 | (-) | NNNNNNNWATGCAAATNNNW<br>NNW | CGTAAACATTTGAATTTATTGGG |
| M00135 | V\$OCT1_01 | 0.82109<br>4       | 2194 | (-) | NNNNWTATGCAAATNTNNN         | TAAACATTTGAATTTATTG     |
| M00162 | V\$OCT1_06 | 0.89101<br>4       | 2195 | (+) | CWNAWTKWSATRYN              | AAACATTTGAATTT          |
| M00162 | V\$OCT1_06 | 0.81210<br>6       | 2196 | (+) | CWNAWTKWSATRYN              | AACATTTGAATTTA          |
| M00162 | V\$OCT1_06 | 0.79284<br>9       | 2196 | (-) | CWNAWTKWSATRYN              | AACATTTGAATTTA          |
| M00195 | V\$OCT1_Q6 | 0.78732<br>9       | 2196 | (-) | NNNNATGCAAATNAN             | AACATTTGAATTTAT         |
| M00138 | V\$OCT1_04 | 0.83437<br>7       | 2204 | (+) | NNNNNNNWATGCAAATNNNW<br>NNW | AATTTATTGGGGAAATATTTTCA |
| M00162 | V\$OCT1_06 | 0.80820<br>5       | 2217 | (+) | CWNAWTKWSATRYN              | AATATTTTCACTCC          |
| M00162 | V\$OCT1_06 | 0.84235<br>3       | 2244 | (-) | CWNAWTKWSATRYN              | TAAAAGTAAGAAAC          |
| M00137 | V\$OCT1_03 | 0.83945<br>5       | 2263 | (+) | NNNRTAATNANNN               | ACCATAACAAGGA           |
| M00162 | V\$OCT1_06 | 0.78586<br>3       | 2276 | (+) | CWNAWTKWSATRYN              | CTTCTTTTAAAGTT          |
| M00138 | V\$OCT1_04 | 0.78316<br>4       | 2301 | (+) | NNNNNNNWATGCAAATNNNW<br>NNW | CAGAGAAAATGTAGATTCCCCAA |
| M00136 | V\$OCT1_02 | 0.83351<br>2       | 2303 | (+) | NNGAATATKCANNNN             | GAGAAAATGTAGATT         |
| M00195 | V\$OCT1_Q6 | 0.83437<br>5       | 2305 | (+) | NNNNATGCAAATNAN             | GAAAATGTAGATTCC         |
| M00162 | V\$OCT1_06 | 0.83437<br>5       | 2306 | (+) | CWNAWTKWSATRYN              | AAAATGTAGATTCC          |
| M00162 | V\$OCT1_06 | 0.79308<br>5       | 2306 | (-) | CWNAWTKWSATRYN              | AAAATGTAGATTCC          |
| M00248 | V\$OCT1_07 | 0.78045<br>9       | 2306 | (+) | TNTATGNTAATT                | AAAATGTAGATT            |
| M00136 | V\$OCT1_02 | 5                  | 2331 | (+) | NNGAATATKCANNNN             | AAGCATATGTCAGAA         |
| M00162 | V\$OCT1_06 | 0.90625            | 2334 | (-) | CWNAWTKWSATRYN              | CATATGTCAGAATT          |

|        |             |         |      |                   |                     |                       |
|--------|-------------|---------|------|-------------------|---------------------|-----------------------|
|        |             | 0.82539 |      |                   |                     |                       |
| M00162 | V\$OCT1_06  | 1       | 2341 | (+)               | CWNAWTKWSATRYN      | CAGAATTCATCAT         |
| M00162 | V\$OCT1_06  | 0.85    | 2342 | (-)               | CWNAWTKWSATRYN      | AGAATTCATCATT         |
|        |             | 0.82148 |      |                   |                     |                       |
| M00162 | V\$OCT1_06  | 4       | 2352 | (+)               | CWNAWTKWSATRYN      | CATTCTTGACTGCA        |
|        |             | 0.86551 |      |                   |                     |                       |
| M00161 | V\$OCT1_05  | 6       | 2383 | (+)               | MKNATTGTCATAYY      | ATCCTTTGCAAATG        |
|        |             | 0.79830 |      |                   |                     |                       |
| M00195 | V\$OCT1_Q6  | 8       | 2384 | (+)               | NNNNATGCAAATNAN     | TCCTTTGCAAATGAT       |
|        |             | 0.82539 |      |                   |                     |                       |
| M00136 | V\$OCT1_02  | 3       | 2399 | (-)               | NNGAATATKCANNNN     | GTGTTGAATAGTGCT       |
|        |             | 0.82929 |      |                   |                     |                       |
| M00162 | V\$OCT1_06  | 7       | 2459 | (-)               | CWNAWTKWSATRYN      | CACCTGCAATGCAG        |
|        |             | 0.84765 |      |                   |                     |                       |
| M00162 | V\$OCT1_06  | 6       | 2501 | (-)               | CWNAWTKWSATRYN      | AAGATCCCATGGAG        |
|        |             | 0.85354 |      |                   |                     |                       |
| M00223 | V\$STAT_01  | 2       | 75   | (-)               | TTCCCRKAA           | TTTTAGGAA             |
|        |             | 0.81673 |      |                   |                     |                       |
| M00223 | V\$STAT_01  | 8       | 156  | (-)               | TTCCCRKAA           | TTCAAAAAA             |
|        |             | 0.80968 |      |                   |                     |                       |
| M00223 | V\$STAT_01  | 261     | (+)  | TTCCCRKAA         | TTCTTAAAA           |                       |
|        |             | 0.72089 |      |                   |                     |                       |
| M00224 | V\$STAT1_01 | 6       | 331  | (-)               | NNNSANTCCGGAANTGNSN | TCTTATTTAAGGAAGAGCTA  |
|        |             | 0.75135 |      |                   |                     |                       |
| M00224 | V\$STAT1_01 | 8       | 642  | (+)               | NNNSANTCCGGAANTGNSN | GTAAAATTGAGGTAAGTGGCT |
|        |             | 0.84976 |      |                   |                     |                       |
| M00223 | V\$STAT_01  | 1       | 775  | (+)               | TTCCCRKAA           | ATCCTGTAA             |
|        |             | 0.81774 |      |                   |                     |                       |
| M00223 | V\$STAT_01  | 6       | 781  | (-)               | TTCCCRKAA           | TAAGAGGAA             |
|        |             | 0.84471 |      |                   |                     |                       |
| M00223 | V\$STAT_01  | 9       | 1023 | (-)               | TTCCCRKAA           | TTAGAATAA             |
|        |             | 0.79581 |      |                   |                     |                       |
| M00223 | V\$STAT_01  | 5       | 1147 | (+)               | TTCCCRKAA           | ATCTTAGAA             |
|        |             | 0.84446 |      |                   |                     |                       |
| M00223 | V\$STAT_01  | 7       | 1334 | (+)               | TTCCCRKAA           | TTCCCCTTA             |
|        |             | 0.79253 |      |                   |                     |                       |
| M00223 | V\$STAT_01  | 8       | 1472 | (+)               | TTCCCRKAA           | TTAGTATAA             |
|        |             | 0.92235 |      |                   |                     |                       |
| M00223 | V\$STAT_01  | 9       | 1698 | (+)               | TTCCCRKAA           | TTCTTGTA              |
|        |             | 0.83362 |      |                   |                     |                       |
| M00223 | V\$STAT_01  | 7       | 1698 | (-)               | TTCCCRKAA           | TTCTTGTA              |
|        |             | 0.80968 |      |                   |                     |                       |
| M00223 | V\$STAT_01  | 1780    | (+)  | TTCCCRKAA         | TTATCTGAA           |                       |
|        |             | 0.82656 |      |                   |                     |                       |
| M00223 | V\$STAT_01  | 9       | 1780 | (-)               | TTCCCRKAA           | TTATCTGAA             |
|        |             | 0.81295 |      |                   |                     |                       |
| M00223 | V\$STAT_01  | 7       | 2227 | (-)               | TTCCCRKAA           | CTCCAAGAA             |
|        |             | 0.80968 |      |                   |                     |                       |
| M00223 | V\$STAT_01  | 2240    | (+)  | TTCCCRKAA         | TTCTTAAAA           |                       |
|        |             | 0.81976 |      |                   |                     |                       |
| M00223 | V\$STAT_01  | 3       | 2277 | (+)               | TTCCCRKAA           | TTCTTTTAA             |
|        |             | 0.75679 |      |                   |                     |                       |
| M00224 | V\$STAT1_01 | 2       | 2549 | (+)               | NNNSANTCCGGAANTGNSN | GGAGAATTCCTTGAACAGAAG |
|        |             | 0.87068 |      |                   |                     |                       |
| M00223 | V\$STAT_01  | 3       | 2555 | (+)               | TTCCCRKAA           | TTCTTGAA              |
|        |             | 0.80602 |      |                   |                     |                       |
| M00059 | V\$YY1_01   | 9       | 67   | (+)               | NNNNNCCATNTWNNNWN   | TGTCTTCCTTTTAGGAA     |
|        |             | 0.82929 |      |                   |                     |                       |
| M00059 | V\$YY1_01   | 2       | 93   | (+)               | NNNNNCCATNTWNNNWN   | TATTTTCATTATCTTT      |
|        |             | 0.78243 |      |                   |                     |                       |
| M00059 | V\$YY1_01   | 8       | 145  | (+)               | NNNNNCCATNTWNNNWN   | TAATAGCATTGTTCCAA     |
|        |             | 0.79456 |      |                   |                     |                       |
| M00059 | V\$YY1_01   | 1       | 532  | (-)               | NNNNNCCATNTWNNNWN   | CTATTTCTATGGTCTC      |
|        |             | 0.85616 |      |                   |                     |                       |
| M00059 | V\$YY1_01   | 542     | (+)  | NNNNNCCATNTWNNNWN | GGTTCTCATTTATCAAC   |                       |
|        |             | 0.77293 |      |                   |                     |                       |
| M00059 | V\$YY1_01   | 563     | (+)  | NNNNNCCATNTWNNNWN | TATAAGCATTTCTTTAA   |                       |

|                |            |         |      |                   |                      |                      |
|----------------|------------|---------|------|-------------------|----------------------|----------------------|
|                |            | 6       |      |                   |                      |                      |
|                |            | 0.81225 |      |                   |                      |                      |
| M00059         | V\$YY1_01  | 4       | 593  | (+)               | NNNNNCCATNTWNNNWN    | TTTGTCCATGTTCCAGT    |
|                |            | 0.77260 |      |                   |                      |                      |
| M00059         | V\$YY1_01  | 8       | 613  | (-)               | NNNNNCCATNTWNNNWN    | TTTCATCCATGGAAAAAT   |
|                |            | 0.78276 |      |                   |                      |                      |
| M00059         | V\$YY1_01  | 5       | 662  | (-)               | NNNNNCCATNTWNNNWN    | TATATATAATGAACTTA    |
|                |            | 0.79095 |      |                   |                      |                      |
| M00059         | V\$YY1_01  | 7       | 731  | (+)               | NNNNNCCATNTWNNNWN    | CATTGTCATTATGAAAT    |
|                |            | 0.77326 |      |                   |                      |                      |
| M00059         | V\$YY1_01  | 3       | 733  | (-)               | NNNNNCCATNTWNNNWN    | TTGTCATTATGAAATGC    |
|                |            | 0.79423 |      |                   |                      |                      |
| M00059         | V\$YY1_01  | 3       | 738  | (-)               | NNNNNCCATNTWNNNWN    | ATTATGAAATGCTTATA    |
|                |            | 0.79259 |      |                   |                      |                      |
| M00059         | V\$YY1_01  | 5       | 792  | (-)               | NNNNNCCATNTWNNNWN    | AAGAATATCTGGGATTC    |
|                |            | 0.79357 |      |                   |                      |                      |
| M00059         | V\$YY1_01  | 8       | 869  | (+)               | NNNNNCCATNTWNNNWN    | AATTCCCATGCATACAC    |
|                |            | 0.79390 |      |                   |                      |                      |
| M00059         | V\$YY1_01  | 6       | 1353 | (+)               | NNNNNCCATNTWNNNWN    | AGGCTCCAGGTTTTGGC    |
|                |            | 0.77883 |      |                   |                      |                      |
| M00059         | V\$YY1_01  | 4       | 1373 | (-)               | NNNNNCCATNTWNNNWN    | CCTGAAATCTGATTTTA    |
|                |            | 0.80406 |      |                   |                      |                      |
| M00059         | V\$YY1_01  | 3       | 1414 | (-)               | NNNNNCCATNTWNNNWN    | TTTCTGATATGATTCTC    |
|                |            | 0.83650 |      |                   |                      |                      |
| M00059         | V\$YY1_01  | 1       | 1456 | (-)               | NNNNNCCATNTWNNNWN    | AAAAATATATGGCATTT    |
|                |            | 0.78702 |      |                   |                      |                      |
| M00059         | V\$YY1_01  | 5       | 1479 | (+)               | NNNNNCCATNTWNNNWN    | AAACATCATTATTTTTC    |
|                |            | 0.78833 |      |                   |                      |                      |
| M00059         | V\$YY1_01  | 6       | 1616 | (-)               | NNNNNCCATNTWNNNWN    | ATGCCCAAATGAGCCTC    |
|                |            | 0.80865 |      |                   |                      |                      |
| M00059         | V\$YY1_01  | 1733    | (-)  | NNNNNCCATNTWNNNWN | GTTTCTCAATGAATCTA    |                      |
|                |            | 0.75812 |      |                   |                      |                      |
| M00069         | V\$YY1_02  | 2       | 1755 | (-)               | NNNCGGCCATCTTGNCTSNW | ATCAGTCTTCATTGCCCTTT |
|                |            | 0.82208 |      |                   |                      |                      |
| M00059         | V\$YY1_01  | 4       | 1764 | (+)               | NNNNNCCATNTWNNNWN    | CATTGCCCTTTTCTAAT    |
|                |            | 0.78374 |      |                   |                      |                      |
| M00059         | V\$YY1_01  | 8       | 1776 | (-)               | NNNNNCCATNTWNNNWN    | CTAATTATCTGAAGATA    |
|                |            | 0.77850 |      |                   |                      |                      |
| M00059         | V\$YY1_01  | 6       | 1834 | (-)               | NNNNNCCATNTWNNNWN    | GAGTAAACTGTTATTA     |
|                |            | 0.86959 |      |                   |                      |                      |
| M00059         | V\$YY1_01  | 4       | 1879 | (-)               | NNNNNCCATNTWNNNWN    | AAGTAAACATGAAGTTC    |
|                |            | 0.78243 |      |                   |                      |                      |
| M00059         | V\$YY1_01  | 8       | 1892 | (+)               | NNNNNCCATNTWNNNWN    | GTTCTTCATCTTTACCT    |
|                |            | 0.78150 |      |                   |                      |                      |
| M00069         | V\$YY1_02  | 7       | 2062 | (-)               | NNNCGGCCATCTTGNCTSNW | ATAATCAAAGACGGCCTTGG |
|                |            | 0.81651 |      |                   |                      |                      |
| M00059         | V\$YY1_01  | 4       | 2098 | (-)               | NNNNNCCATNTWNNNWN    | TTATGAAGATGGACAAA    |
|                |            | 0.82110 |      |                   |                      |                      |
| M00059         | V\$YY1_01  | 1       | 2250 | (-)               | NNNNNCCATNTWNNNWN    | TAAGAAACATGGAACCA    |
|                |            | 0.83617 |      |                   |                      |                      |
| M00059         | V\$YY1_01  | 3       | 2301 | (-)               | NNNNNCCATNTWNNNWN    | CAGAGAAAATGTAGATT    |
|                |            | 0.82241 |      |                   |                      |                      |
| M00059         | V\$YY1_01  | 2       | 2386 | (-)               | NNNNNCCATNTWNNNWN    | CTTTGCAAATGATGTGT    |
|                |            | 0.77293 |      |                   |                      |                      |
| M00059         | V\$YY1_01  | 6       | 2480 | (+)               | NNNNNCCATNTWNNNWN    | CAGCTCCATCCCTGGGT    |
|                |            | 0.78309 |      |                   |                      |                      |
| M00059         | V\$YY1_01  | 3       | 2513 | (-)               | NNNNNCCATNTWNNNWN    | AGAAGGAAATGGCAACC    |
| CSN2 Bos Tarus |            |         |      |                   |                      |                      |
|                |            | 0.81304 |      |                   |                      |                      |
| M00216         | V\$TATA_C  | 5       | 2    | (+)               | NCTATAAAAR           | CCCTTTAAAA           |
|                |            | 0.94507 |      |                   |                      |                      |
| M00216         | V\$TATA_C  | 5       | 3    | (+)               | NCTATAAAAR           | CCTTTAAAAAT          |
|                |            | 0.84648 |      |                   |                      |                      |
| M00252         | V\$TATA_01 | 6       | 4    | (+)               | STATAAAWRNNNNNNN     | CTTTAAAAATGCTCCC     |
|                |            | 0.81462 |      |                   |                      |                      |
| M00216         | V\$TATA_C  | 110     | (+)  | NCTATAAAAR        | ACCACAAAAT           |                      |

|        |            |         |     |     |                 |                 |
|--------|------------|---------|-----|-----|-----------------|-----------------|
|        |            | 9       |     |     |                 |                 |
|        |            | 0.80987 |     |     |                 |                 |
| M00216 | V\$TATA_C  | 6       | 126 | (+) | NCTATAAAAR      | GCCATTAAAT      |
|        |            | 0.75996 |     |     |                 |                 |
| M00216 | V\$TATA_C  | 8       | 127 | (+) | NCTATAAAAR      | CCATTAAATA      |
|        |            | 0.77163 |     |     |                 |                 |
| M00252 | V\$TATA_01 | 2       | 127 | (+) | STATAAAWRNNNNNN | CCATTAAATACTATA |
|        |            | 0.79508 |     |     |                 |                 |
| M00216 | V\$TATA_C  | 8       | 136 | (+) | NCTATAAAAR      | ACTATATATA      |
|        |            | 0.90230 |     |     |                 |                 |
| M00252 | V\$TATA_01 | 9       | 137 | (+) | STATAAAWRNNNNNN | CTATATATAACAAC  |
|        |            | 0.80934 |     |     |                 |                 |
| M00216 | V\$TATA_C  | 8       | 138 | (+) | NCTATAAAAR      | TATATATAAA      |
|        |            | 0.89571 |     |     |                 |                 |
| M00252 | V\$TATA_01 | 2       | 139 | (+) | STATAAAWRNNNNNN | ATATATAACAACCA  |
|        |            | 0.75178 |     |     |                 |                 |
| M00216 | V\$TATA_C  | 2       | 140 | (+) | NCTATAAAAR      | TATATAAACA      |
|        |            | 0.83100 |     |     |                 |                 |
| M00252 | V\$TATA_01 | 7       | 141 | (+) | STATAAAWRNNNNNN | ATATAACAACCACA  |
|        |            | 0.81462 |     |     |                 |                 |
| M00216 | V\$TATA_C  | 9       | 150 | (+) | NCTATAAAAR      | ACCACAAAAT      |
|        |            | 0.77772 |     |     |                 |                 |
| M00252 | V\$TATA_01 | 1       | 151 | (+) | STATAAAWRNNNNNN | CCACAAAATCAGATC |
|        |            | 0.79033 |     |     |                 |                 |
| M00216 | V\$TATA_C  | 5       | 272 | (+) | NCTATAAAAR      | AGGTTAAAT       |
|        |            | 0.88354 |     |     |                 |                 |
| M00216 | V\$TATA_C  | 9       | 298 | (+) | NCTATAAAAR      | TGCTTAAAT       |
|        |            | 0.85555 |     |     |                 |                 |
| M00216 | V\$TATA_C  | 8       | 310 | (+) | NCTATAAAAR      | ATCTTAAAAA      |
|        |            | 0.82360 |     |     |                 |                 |
| M00216 | V\$TATA_C  | 7       | 311 | (+) | NCTATAAAAR      | TCTTAAAAAT      |
|        |            | 0.79091 |     |     |                 |                 |
| M00252 | V\$TATA_01 | 6       | 313 | (+) | STATAAAWRNNNNNN | TTAAAAATAAGGATG |
|        |            | 0.78901 |     |     |                 |                 |
| M00216 | V\$TATA_C  | 5       | 326 | (+) | NCTATAAAAR      | TGTTTAAGAT      |
|        |            | 0.75917 |     |     |                 |                 |
| M00216 | V\$TATA_C  | 6       | 361 | (+) | NCTATAAAAR      | TTGTTAAAT       |
|        |            | 0.85951 |     |     |                 |                 |
| M00216 | V\$TATA_C  | 9       | 378 | (+) | NCTATAAAAR      | ACTATAAAGA      |
|        |            | 0.83202 |     |     |                 |                 |
| M00252 | V\$TATA_01 | 2       | 379 | (+) | STATAAAWRNNNNNN | CTATAAAGATTTGTA |
|        |            | 0.83205 |     |     |                 |                 |
| M00216 | V\$TATA_C  | 7       | 437 | (+) | NCTATAAAAR      | TGTATTAAAA      |
|        |            | 0.80908 |     |     |                 |                 |
| M00216 | V\$TATA_C  | 4       | 438 | (+) | NCTATAAAAR      | GTATTTAAAG      |
|        |            |         |     |     |                 |                 |
| M00252 | V\$TATA_01 | 0.86171 | 438 | (+) | STATAAAWRNNNNNN | GTATTTAAAGATCTT |
|        |            | 0.83865 |     |     |                 |                 |
| M00216 | V\$TATA_C  | 9       | 494 | (+) | NCTATAAAAR      | GCCATAAAGG      |
|        |            | 0.84039 |     |     |                 |                 |
| M00252 | V\$TATA_01 | 6       | 495 | (+) | STATAAAWRNNNNNN | CCATAAAGGCAAGCA |
|        |            | 0.78558 |     |     |                 |                 |
| M00216 | V\$TATA_C  | 2       | 561 | (+) | NCTATAAAAR      | CCAACAAAAA      |
|        |            |         |     |     |                 |                 |
| M00252 | V\$TATA_01 | 0.85968 | 571 | (+) | STATAAAWRNNNNNN | GTTTATAGAGCTAGC |
|        |            | 0.77670 |     |     |                 |                 |
| M00252 | V\$TATA_01 | 6       | 584 | (+) | STATAAAWRNNNNNN | GCATATTTAGTCAAG |
|        |            | 0.82136 |     |     |                 |                 |
| M00252 | V\$TATA_01 | 5       | 599 | (+) | STATAAAWRNNNNNN | AGATAAAGAGGGTTG |
|        |            | 0.82136 |     |     |                 |                 |
| M00252 | V\$TATA_01 | 5       | 639 | (+) | STATAAAWRNNNNNN | GTATTTATAAAGAA  |
|        |            | 0.78373 |     |     |                 |                 |
| M00216 | V\$TATA_C  | 4       | 640 | (+) | NCTATAAAAR      | TATTTATAAA      |
|        |            | 0.84876 |     |     |                 |                 |
| M00252 | V\$TATA_01 | 9       | 641 | (+) | STATAAAWRNNNNNN | ATTTATAAAGAAGA  |

|        |            |         |      |     |                 |                  |
|--------|------------|---------|------|-----|-----------------|------------------|
|        |            | 0.92711 |      |     |                 |                  |
| M00216 | V\$TATA_C  | 9       | 642  | (+) | NCTATAAAAR      | TTTATAAAAG       |
|        |            | 0.90433 |      |     |                 |                  |
| M00252 | V\$TATA_01 | 9       | 643  | (+) | STATAAAWRNNNNNN | TTATAAAAGAAGAGT  |
|        |            | 0.77772 |      |     |                 |                  |
| M00252 | V\$TATA_01 | 1       | 656  | (+) | STATAAAWRNNNNNN | GTATATTATTAAAA   |
|        |            | 0.77772 |      |     |                 |                  |
| M00252 | V\$TATA_01 | 1       | 658  | (+) | STATAAAWRNNNNNN | ATATTTATTAAAAAT  |
|        |            | 0.79376 |      |     |                 |                  |
| M00216 | V\$TATA_C  | 8       | 661  | (+) | NCTATAAAAR      | TTTATTAAAA       |
|        |            | 0.79218 |      |     |                 |                  |
| M00216 | V\$TATA_C  | 4       | 662  | (+) | NCTATAAAAR      | TTATTAATAAT      |
|        |            | 0.79878 |      |     |                 |                  |
| M00252 | V\$TATA_01 | 2       | 662  | (+) | STATAAAWRNNNNNN | TTATTAATAATTGCTC |
|        |            | 0.76102 |      |     |                 |                  |
| M00216 | V\$TATA_C  | 5       | 716  | (+) | NCTATAAAAR      | ATTTCAAAAA       |
|        |            | 0.74465 |      |     |                 |                  |
| M00216 | V\$TATA_C  | 3       | 724  | (+) | NCTATAAAAR      | AATATTAAAA       |
|        |            | 0.78505 |      |     |                 |                  |
| M00216 | V\$TATA_C  | 4       | 725  | (+) | NCTATAAAAR      | ATATTAATAAT      |
|        |            | 0.84673 |      |     |                 |                  |
| M00252 | V\$TATA_01 | 9       | 725  | (+) | STATAAAWRNNNNNN | ATATTAATAATAGATA |
|        |            | 0.78025 |      |     |                 |                  |
| M00252 | V\$TATA_01 | 9       | 756  | (+) | STATAAAWRNNNNNN | AAATTAAGAGAAAAG  |
|        |            | 0.80195 |      |     |                 |                  |
| M00216 | V\$TATA_C  | 4       | 779  | (+) | NCTATAAAAR      | TTTGTAATAAA      |
|        |            | 0.83205 |      |     |                 |                  |
| M00216 | V\$TATA_C  | 7       | 781  | (+) | NCTATAAAAR      | TGTAATAAAAA      |
|        |            |         |      |     |                 |                  |
| M00252 | V\$TATA_01 | 0.7729  | 782  | (+) | STATAAAWRNNNNNN | GTAAAAAAAAATTCT  |
|        |            | 0.77898 |      |     |                 |                  |
| M00216 | V\$TATA_C  | 1       | 828  | (+) | NCTATAAAAR      | ACAATGAAAA       |
|        |            | 0.88909 |      |     |                 |                  |
| M00216 | V\$TATA_C  | 4       | 889  | (+) | NCTATAAAAR      | GGCTTAATAAA      |
|        |            | 0.81172 |      |     |                 |                  |
| M00216 | V\$TATA_C  | 4       | 890  | (+) | NCTATAAAAR      | GCTTAATAAAT      |
|        |            | 0.79446 |      |     |                 |                  |
| M00252 | V\$TATA_01 | 8       | 890  | (+) | STATAAAWRNNNNNN | GCTTAATAAATTGGCA |
|        |            | 0.85027 |      |     |                 |                  |
| M00216 | V\$TATA_C  | 7       | 901  | (+) | NCTATAAAAR      | GGCATATAAA       |
|        |            |         |      |     |                 |                  |
| M00252 | V\$TATA_01 | 0.8305  | 902  | (+) | STATAAAWRNNNNNN | GCATATAAATGCTA   |
|        |            | 0.85582 |      |     |                 |                  |
| M00216 | V\$TATA_C  | 3       | 903  | (+) | NCTATAAAAR      | CATATAAAT        |
|        |            | 0.88353 |      |     |                 |                  |
| M00252 | V\$TATA_01 | 2       | 904  | (+) | STATAAAWRNNNNNN | ATATAAATGCTAAT   |
|        |            | 0.89120 |      |     |                 |                  |
| M00216 | V\$TATA_C  | 7       | 917  | (+) | NCTATAAAAR      | ATTATAAAT        |
|        |            | 0.82263 |      |     |                 |                  |
| M00252 | V\$TATA_01 | 4       | 918  | (+) | STATAAAWRNNNNNN | TTATAAATAAACAA   |
|        |            | 0.77898 |      |     |                 |                  |
| M00216 | V\$TATA_C  | 1       | 997  | (+) | NCTATAAAAR      | ACAATGAAAA       |
|        |            | 0.78431 |      |     |                 |                  |
| M00252 | V\$TATA_01 | 9       | 1033 | (+) | STATAAAWRNNNNNN | GGATAAAGTAAACA   |
|        |            | 0.74650 |      |     |                 |                  |
| M00216 | V\$TATA_C  | 1       | 1074 | (+) | NCTATAAAAR      | AATATAGAAA       |
|        |            | 0.75178 |      |     |                 |                  |
| M00216 | V\$TATA_C  | 2       | 1076 | (+) | NCTATAAAAR      | TATAGAAAAA       |
|        |            | 0.74914 |      |     |                 |                  |
| M00216 | V\$TATA_C  | 2       | 1167 | (+) | NCTATAAAAR      | AACTTATAAA       |
|        |            | 0.91523 |      |     |                 |                  |
| M00216 | V\$TATA_C  | 6       | 1169 | (+) | NCTATAAAAR      | CTTATAAAAA       |
|        |            | 0.90002 |      |     |                 |                  |
| M00252 | V\$TATA_01 | 5       | 1170 | (+) | STATAAAWRNNNNNN | TTATAAATGCAAC    |
|        |            | 0.77112 |      |     |                 |                  |
| M00252 | V\$TATA_01 | 4       | 1172 | (+) | STATAAAWRNNNNNN | ATAAATGCAACAA    |

|        |            |         |      |     |                 |                  |
|--------|------------|---------|------|-----|-----------------|------------------|
|        |            | 0.74782 |      |     |                 |                  |
| M00216 | V\$TATA_C  | 1       | 1180 | (+) | NCTATAAAAR      | GCAACAAAAC       |
|        |            | 0.75019 |      |     |                 |                  |
| M00216 | V\$TATA_C  | 8       | 1192 | (+) | NCTATAAAAR      | ACCATTTAAT       |
|        |            | 0.79599 |      |     |                 |                  |
| M00252 | V\$TATA_01 | 1       | 1306 | (+) | STATAAAWRNNNNNN | AGATAAGTACACAGT  |
|        |            | 0.85740 |      |     |                 |                  |
| M00216 | V\$TATA_C  | 7       | 1352 | (+) | NCTATAAAAR      | TCTCTAAAAT       |
|        |            | 0.75917 |      |     |                 |                  |
| M00216 | V\$TATA_C  | 6       | 1437 | (+) | NCTATAAAAR      | CCAAGAAAAC       |
|        |            | 0.79271 |      |     |                 |                  |
| M00216 | V\$TATA_C  | 2       | 1503 | (+) | NCTATAAAAR      | GAAATAAAAG       |
|        |            | 0.78051 |      |     |                 |                  |
| M00252 | V\$TATA_01 | 3       | 1504 | (+) | STATAAAWRNNNNNN | AAATAAAAAGATATGA |
|        |            | 0.76630 |      |     |                 |                  |
| M00216 | V\$TATA_C  | 6       | 1531 | (+) | NCTATAAAAR      | TTCATGAAAA       |
|        |            | 0.74306 |      |     |                 |                  |
| M00216 | V\$TATA_C  | 8       | 1532 | (+) | NCTATAAAAR      | TCATGAAAAT       |
|        |            | 0.75310 |      |     |                 |                  |
| M00216 | V\$TATA_C  | 3       | 1561 | (+) | NCTATAAAAR      | AAGATAAAAA       |
|        |            | 0.83836 |      |     |                 |                  |
| M00252 | V\$TATA_01 | 6       | 1562 | (+) | STATAAAWRNNNNNN | AGATAAAAATAAAGT  |
|        |            | 0.88170 |      |     |                 |                  |
| M00216 | V\$TATA_C  | 1       | 1618 | (+) | NCTATAAAAR      | TCAATAAAAC       |
|        |            | 0.81172 |      |     |                 |                  |
| M00252 | V\$TATA_01 | 3       | 1619 | (+) | STATAAAWRNNNNNN | CAATAAAACTGAGTC  |
|        |            | 0.81647 |      |     |                 |                  |
| M00216 | V\$TATA_C  | 7       | 1649 | (+) | NCTATAAAAR      | ACTTTAATAT       |
|        |            | 0.89622 |      |     |                 |                  |
| M00216 | V\$TATA_C  | 4       | 1699 | (+) | NCTATAAAAR      | GCAATAAAAA       |
|        |            | 0.81349 |      |     |                 |                  |
| M00252 | V\$TATA_01 | 9       | 1700 | (+) | STATAAAWRNNNNNN | CAATAAAAATTAATA  |
|        |            | 0.78279 |      |     |                 |                  |
| M00252 | V\$TATA_01 | 6       | 1710 | (+) | STATAAAWRNNNNNN | TAATAAATAAATATT  |
|        |            | 0.76815 |      |     |                 |                  |
| M00216 | V\$TATA_C  | 4       | 1723 | (+) | NCTATAAAAR      | TTTTTAATAA       |
|        |            | 0.81278 |      |     |                 |                  |
| M00216 | V\$TATA_C  | 1       | 1786 | (+) | NCTATAAAAR      | TCCAAAAAAC       |
|        |            | 0.77518 |      |     |                 |                  |
| M00252 | V\$TATA_01 | 4       | 1811 | (+) | STATAAAWRNNNNNN | GAATAAGATGAAAAG  |
|        |            | 0.74544 |      |     |                 |                  |
| M00216 | V\$TATA_C  | 5       | 1849 | (+) | NCTATAAAAR      | AGCTGAAAAC       |
|        |            | 0.77766 |      |     |                 |                  |
| M00216 | V\$TATA_C  |         | 1935 | (+) | NCTATAAAAR      | ATGATAAAAT       |
|        |            | 0.74465 |      |     |                 |                  |
| M00216 | V\$TATA_C  | 3       | 1946 | (+) | NCTATAAAAR      | TCTATTAATA       |
|        |            | 0.79015 |      |     |                 |                  |
| M00252 | V\$TATA_01 | 5       | 1947 | (+) | STATAAAWRNNNNNN | CTATTAATATTTTC   |
|        |            | 0.78452 |      |     |                 |                  |
| M00216 | V\$TATA_C  | 6       | 1958 | (+) | NCTATAAAAR      | TTTCTAAAAT       |
|        |            | 0.85239 |      |     |                 |                  |
| M00216 | V\$TATA_C  |         | 2089 | (+) | NCTATAAAAR      | TCTTTTAAAG       |
|        |            | 0.77898 |      |     |                 |                  |
| M00216 | V\$TATA_C  | 1       | 2090 | (+) | NCTATAAAAR      | CTTTTAAAGG       |
|        |            | 0.84572 |      |     |                 |                  |
| M00252 | V\$TATA_01 | 4       | 2090 | (+) | STATAAAWRNNNNNN | CTTTTAAAGGGAAGT  |
|        |            | 0.79396 |      |     |                 |                  |
| M00252 | V\$TATA_01 | 1       | 2091 | (+) | STATAAAWRNNNNNN | TTTTAAAGGGAAGTA  |
|        |            | 0.78152 |      |     |                 |                  |
| M00252 | V\$TATA_01 | 8       | 2111 | (+) | STATAAAWRNNNNNN | ACTTAAATAAGAAAA  |
|        |            | 0.74016 |      |     |                 |                  |
| M00216 | V\$TATA_C  | 4       | 2112 | (+) | NCTATAAAAR      | CTTAAATAAG       |
|        |            | 0.80436 |      |     |                 |                  |
| M00252 | V\$TATA_01 | 4       | 2255 | (+) | STATAAAWRNNNNNN | AAATAAATAAGACTA  |
|        |            | 0.78381 |      |     |                 |                  |
| M00252 | V\$TATA_01 | 1       | 2257 | (+) | STATAAAWRNNNNNN | ATAAATAAGACTAGT  |



|        |             |                    |      |     |                      |                                         |
|--------|-------------|--------------------|------|-----|----------------------|-----------------------------------------|
| M00216 | V\$TATA_C   | 0.81462<br>9       | 2286 | (+) | NCTATAAAAR           | TGTAGAAAAT                              |
| M00252 | V\$TATA_01  | 0.81349<br>9       | 2287 | (+) | STATAAAWRNNNNNN      | GTAGAAAATCGCATT                         |
| M00216 | V\$TATA_C   | 0.83205<br>7       | 2316 | (+) | NCTATAAAAR           | TGTATAAATA                              |
| M00252 | V\$TATA_01  | 0.88708<br>4       | 2317 | (+) | STATAAAWRNNNNNN      | GTATAAATAATGCAC                         |
| M00216 | V\$TATA_C   | 0.74412<br>5       | 2353 | (+) | NCTATAAAAR           | GCTAAGAAAG                              |
| M00216 | V\$TATA_C   | 0.74597<br>3       | 2459 | (+) | NCTATAAAAR           | CCTAAAGAAA                              |
| M00223 | V\$STAT_01  | 0.86639<br>8       | 15   | (+) | TTCCCRKAA            | TCCCCAGAA                               |
| M00223 | V\$STAT_01  | 0.80489<br>0.74806 | 15   | (-) | TTCCCRKAA            | TCCCCAGAA<br>GCAGATTCTAG-<br>GAATTCAAA  |
| M00224 | V\$STAT1_01 | 0.78033<br>5       | 67   | (+) | NNNSANTCCGGGAANTGNSN | GCAGATTCTAG-<br>GAATTCAAA               |
| M00224 | V\$STAT1_01 | 0.76509<br>9       | 67   | (-) | NNNSANTCCGGGAANTGNSN | GCAGATTCTAG-<br>GAATTCAAA               |
| M00225 | V\$STAT3_01 | 0.78725<br>8       | 67   | (+) | NGNNATTCCSGGAARTGNNN | GCAGATTCTAG-<br>GAATTCAAA               |
| M00225 | V\$STAT3_01 | 0.85076<br>6       | 67   | (-) | NGNNATTCCSGGAARTGNNN | GCAGATTCTAG-<br>GAATTCAAA               |
| M00223 | V\$STAT_01  | 0.95613<br>9       | 73   | (+) | TTCCCRKAA            | TTCTAGGAA                               |
| M00223 | V\$STAT_01  | 0.80262<br>8       | 73   | (-) | TTCCCRKAA            | TTCTAGGAA                               |
| M00223 | V\$STAT_01  | 0.80589<br>2       | 329  | (-) | TTCCCRKAA            | TTAAGATAA                               |
| M00223 | V\$STAT_01  | 0.85934<br>9       | 341  | (-) | TTCCCRKAA            | TTACAGTAT                               |
| M00223 | V\$STAT_01  | 0.82253<br>6       | 523  | (-) | TTCCCRKAA            | CTATGGGAA                               |
| M00223 | V\$STAT_01  | 0.84068<br>6       | 672  | (+) | TTCCCRKAA            | TGCTCAGAA                               |
| M00223 | V\$STAT_01  | 0.72773<br>6       | 672  | (-) | TTCCCRKAA            | TGCTCAGAA<br>AGGGAGTACCAG-<br>GAAACAAA  |
| M00225 | V\$STAT3_01 | 0.73540<br>4       | 806  | (+) | NGNNATTCCSGGAARTGNNN | AGGGAGTACCAG-<br>GAAACAAA               |
| M00225 | V\$STAT3_01 | 0.85858<br>9       | 806  | (-) | NGNNATTCCSGGAARTGNNN | AGGGAGTACCAG-<br>GAAACAAA               |
| M00223 | V\$STAT_01  | 0.79178<br>3       | 812  | (-) | TTCCCRKAA            | TACCAGGAA                               |
| M00223 | V\$STAT_01  | 0.80136<br>2       | 846  | (-) | TTCCCRKAA            | TGACAGAAA                               |
| M00223 | V\$STAT_01  | 0.82682<br>1       | 1139 | (-) | TTCCCRKAA            | TGATGGCAA                               |
| M00223 | V\$STAT_01  | 0.79253<br>1       | 1160 | (-) | TTCCCRKAA            | TTTCAAGAA                               |
| M00223 | V\$STAT_01  | 0.81295<br>8       | 1170 | (-) | TTCCCRKAA            | TTATAAAAA                               |
| M00223 | V\$STAT_01  | 0.86639<br>7       | 1435 | (-) | TTCCCRKAA            | GTCCAAGAA<br>GAAGTCTTACTGGAAA-<br>TAAAA |
| M00224 | V\$STAT1_01 | 0.77507<br>1491    | 1491 | (+) | NNNSANTCCGGGAANTGNSN | GAAGTCTTACTGGAAA-<br>TAAAA              |
| M00225 | V\$STAT3_01 | 0.77147<br>1491    | 1491 | (-) | NGNNATTCCSGGAARTGNNN | GAAGTCTTACTGGAAA-<br>TAAAA              |
| M00223 | V\$STAT_01  | 0.92941<br>8       | 1497 | (+) | TTCCCRKAA            | TTACTGGAA                               |
| M00223 | V\$STAT_01  | 0.88757<br>2       | 1497 | (-) | TTCCCRKAA            | TTACTGGAA<br>GCTCTAATCCCAGAATCT<br>AAG  |
| M00224 | V\$STAT1_01 | 0.73357<br>5       | 1669 | (-) | NNNSANTCCGGGAANTGNSN | AAG                                     |
| M00223 | V\$STAT_01  | 0.86639<br>8       | 1675 | (+) | TTCCCRKAA            | ATCCCAGAA                               |

|        |             |         |      |     |                        |                    |
|--------|-------------|---------|------|-----|------------------------|--------------------|
|        |             | 0.80312 |      |     |                        |                    |
| M00223 | V\$STAT_01  | 6       | 1675 | (-) | TTCCCRKAA              | ATCCCAGAA          |
|        |             | 0.85354 |      |     |                        |                    |
| M00223 | V\$STAT_01  | 2       | 1752 | (+) | TTCCCRKAA              | TTTCTGTAA          |
|        |             | 0.81673 |      |     |                        |                    |
| M00223 | V\$STAT_01  | 8       | 1785 | (-) | TTCCCRKAA              | TTCCAAAAA          |
|        |             | 0.80993 |      |     |                        |                    |
| M00223 | V\$STAT_01  | 2       | 1847 | (-) | TTCCCRKAA              | TTAGCTGAA          |
|        |             | 0.71469 |      |     |                        | AAACATTAACTT-      |
| M00225 | V\$STAT3_01 | 9       | 1878 | (-) | NGNNATTTC CSGGAARTGNNN | GAAATGTAA          |
|        |             | 0.79052 |      |     |                        |                    |
| M00223 | V\$STAT_01  | 2       | 1909 | (-) | TTCCCRKAA              | TAATAGTAA          |
|        |             | 0.81976 |      |     |                        |                    |
| M00223 | V\$STAT_01  | 3       | 2088 | (+) | TTCCCRKAA              | TTCTTTTAA          |
|        |             | 0.75761 |      |     |                        | TTCCCATTTCCAG-     |
| M00224 | V\$STAT1_01 | 6       | 2158 | (-) | NNNSANTTC CGGGAANTGNSN | GAATTGAG           |
|        |             | 0.80800 |      |     |                        | TCCCATTTCCAGGAATT- |
| M00224 | V\$STAT1_01 | 3       | 2159 | (+) | NNNSANTTC CGGGAANTGNSN | GAGA               |
|        |             | 0.82446 |      |     |                        | TCCCATTTCCAGGAATT- |
| M00224 | V\$STAT1_01 | 9       | 2159 | (-) | NNNSANTTC CGGGAANTGNSN | GAGA               |
|        |             |         |      |     |                        | TCCCATTTCCAGGAATT- |
| M00225 | V\$STAT3_01 | 0.79609 | 2159 | (+) | NGNNATTTC CSGGAARTGNNN | GAGA               |
|        |             | 0.81303 |      |     |                        | TCCCATTTCCAGGAATT- |
| M00225 | V\$STAT3_01 | 4       | 2159 | (-) | NGNNATTTC CSGGAARTGNNN | GAGA               |
|        |             | 0.86816 |      |     |                        |                    |
| M00223 | V\$STAT_01  | 2       | 2164 | (+) | TTCCCRKAA              | TTCCCAGGA          |
|        |             | 0.80312 |      |     |                        |                    |
| M00223 | V\$STAT_01  | 6       | 2164 | (-) | TTCCCRKAA              | TTCCCAGGA          |
|        |             | 0.85858 |      |     |                        |                    |
| M00223 | V\$STAT_01  | 3       | 2165 | (-) | TTCCCRKAA              | TCCCAGGAA          |
|        |             | 0.85051 |      |     |                        |                    |
| M00223 | V\$STAT_01  | 7       | 2352 | (-) | TTCCCRKAA              | TGCTAAGAA          |
|        |             | 0.80328 |      |     |                        |                    |
| M00127 | V\$GATA1_03 | 3       | 35   | (+) | RNSNNGATAANNNGN        | AGAAAAATAGGAAG     |
|        |             | 0.83563 |      |     |                        |                    |
| M00075 | V\$GATA1_01 | 7       | 58   | (-) | SNNGATNNNN             | TCTAATCATG         |
|        |             | 0.78935 |      |     |                        |                    |
| M00076 | V\$GATA2_01 | 5       | 58   | (-) | NNNGATRNNN             | TCTAATCATG         |
|        |             | 0.86220 |      |     |                        |                    |
| M00077 | V\$GATA3_01 | 6       | 58   | (-) | NNGATARNG              | TCTAATCAT          |
|        |             | 0.87265 |      |     |                        |                    |
| M00075 | V\$GATA1_01 | 5       | 67   | (+) | SNNGATNNNN             | GCAGATTCT          |
|        |             | 0.87144 |      |     |                        |                    |
| M00076 | V\$GATA2_01 | 8       | 67   | (+) | NNNGATRNNN             | GCAGATTCT          |
|        |             | 0.78825 |      |     |                        |                    |
| M00075 | V\$GATA1_01 | 3       | 83   | (-) | SNNGATNNNN             | TCAAATCCAC         |
|        |             | 0.77406 |      |     |                        |                    |
| M00126 | V\$GATA1_02 | 2       | 133  | (-) | NNNNNGATANKGNN         | AATACTATATATAA     |
|        |             |         |      |     |                        |                    |
| M00075 | V\$GATA1_01 | 0.84847 | 154  | (-) | SNNGATNNNN             | CAAAATCAGA         |
|        |             | 0.83987 |      |     |                        |                    |
| M00076 | V\$GATA2_01 | 4       | 154  | (-) | NNNGATRNNN             | CAAAATCAGA         |
|        |             | 0.83872 |      |     |                        |                    |
| M00077 | V\$GATA3_01 | 4       | 154  | (-) | NNGATARNG              | CAAAATCAG          |
|        |             | 0.77048 |      |     |                        |                    |
| M00075 | V\$GATA1_01 | 4       | 159  | (+) | SNNGATNNNN             | TCAGATCATT         |
|        |             | 0.82318 |      |     |                        |                    |
| M00076 | V\$GATA2_01 | 4       | 159  | (+) | NNNGATRNNN             | TCAGATCATT         |
|        |             | 0.88039 |      |     |                        |                    |
| M00203 | V\$GATA_C   | 8       | 162  | (-) | NGATAAGNMNN            | GATCATTATCC        |
|        |             | 0.84312 |      |     |                        |                    |
| M00126 | V\$GATA1_02 | 5       | 163  | (-) | NNNNNGATANKGNN         | ATCATTATCCATTC     |
|        |             | 0.84835 |      |     |                        |                    |
| M00127 | V\$GATA1_03 | 9       | 163  | (-) | RNSNNGATAANNNGN        | ATCATTATCCATTC     |
|        |             | 0.79296 |      |     |                        |                    |
| M00076 | V\$GATA2_01 | 3       | 165  | (-) | NNNGATRNNN             | CATTATCCAT         |

|        |             |                   |     |     |                |                |
|--------|-------------|-------------------|-----|-----|----------------|----------------|
| M00077 | V\$GATA3_01 | 0.86397<br>9      | 165 | (-) | NNGATARNG      | CATTATCCA      |
| M00127 | V\$GATA1_03 | 0.78466<br>4      | 211 | (+) | RNSNNGATAANNGN | AAAAAGGTAAGAAT |
| M00075 | V\$GATA1_01 | 0.84550<br>8      | 219 | (-) | SNNGATNNNN     | AAGAATCTCA     |
| M00076 | V\$GATA2_01 | 0.84934<br>6      | 219 | (-) | NNNGATRNNN     | AAGAATCTCA     |
| M00076 | V\$GATA2_01 | 0.83265<br>7      | 226 | (+) | NNNGATRNNN     | TCAGATATAA     |
| M00077 | V\$GATA3_01 | 0.84093<br>9      | 227 | (+) | NNGATARNG      | CAGATATAA      |
| M00203 | V\$GATA_C   | 0.83379<br>9      | 228 | (+) | NGATAAGNMNN    | AGATATAATTT    |
| M00126 | V\$GATA1_02 | 0.8075<br>0.82843 | 239 | (-) | NNNNNGATANKGNN | CATTGTATCTGCTA |
| M00128 | V\$GATA1_04 | 1<br>0.84254      | 239 | (-) | NNCWGATARNNNN  | CATTGTATCTGCT  |
| M00075 | V\$GATA1_01 | 7<br>0.85836      | 241 | (-) | SNNGATNNNN     | TTGTATCTGC     |
| M00076 | V\$GATA2_01 | 7<br>0.82188      | 241 | (-) | NNNGATRNNN     | TTGTATCTGC     |
| M00077 | V\$GATA3_01 | 7<br>0.80769      | 241 | (-) | NNGATARNG      | TTGTATCTG      |
| M00127 | V\$GATA1_03 | 2<br>0.80503      | 250 | (-) | RNSNNGATAANNGN | CTACTCATCTTTAT |
| M00075 | V\$GATA1_01 | 5<br>0.82498      | 252 | (-) | SNNGATNNNN     | ACTCATCTTT     |
| M00076 | V\$GATA2_01 | 9<br>0.83385      | 252 | (-) | NNNGATRNNN     | ACTCATCTTT     |
| M00077 | V\$GATA3_01 | 0.83782<br>5      | 287 | (+) | RNSNNGATAANNGN | AAGAACATAATTGC |
| M00076 | V\$GATA2_01 | 8<br>0.78619      | 289 | (+) | NNNGATRNNN     | GAACATAATT     |
| M00076 | V\$GATA2_01 | 6<br>0.78980      | 306 | (-) | NNNGATRNNN     | ATAGATCTTA     |
| M00126 | V\$GATA1_02 | 5<br>0.79062      | 313 | (+) | NNNNNGATANKGNN | TTAAAAATAAGGAT |
| M00075 | V\$GATA1_01 | 5<br>0.80651      | 321 | (+) | SNNGATNNNN     | AAGGATGTTT     |
| M00076 | V\$GATA2_01 | 3<br>0.84799      | 321 | (+) | NNNGATRNNN     | AAGGATGTTT     |
| M00126 | V\$GATA1_02 | 5<br>0.86312      | 328 | (+) | NNNNNGATANKGNN | TTTAAGATAAAGTT |
| M00128 | V\$GATA1_04 | 3<br>0.89583      | 329 | (+) | NNCWGATARNNNN  | TTAAGATAAAGTT  |
| M00075 | V\$GATA1_01 | 2<br>0.77295      | 330 | (+) | SNNGATNNNN     | TAAGATAAAG     |
| M00076 | V\$GATA2_01 | 3<br>0.85250      | 330 | (+) | NNNGATRNNN     | TAAGATAAAG     |
| M00077 | V\$GATA3_01 | 2<br>0.91360      | 331 | (+) | NNGATARNG      | AAGATAAAG      |
| M00203 | V\$GATA_C   | 6<br>0.91301      | 332 | (+) | NGATAAGNMNN    | AGATAAAGTTT    |
| M00127 | V\$GATA1_03 | 9<br>0.78784      | 375 | (-) | RNSNNGATAANNGN | GCAACTATAAAGAT |
| M00075 | V\$GATA1_01 | 5<br>0.79960      | 383 | (+) | SNNGATNNNN     | AAAGATTGT      |
| M00076 | V\$GATA2_01 | 9<br>0.80378      | 383 | (+) | NNNGATRNNN     | AAAGATTGT      |
| M00077 | V\$GATA3_01 | 7<br>0.82188      | 384 | (+) | NNGATARNG      | AAGATTGT       |
| M00127 | V\$GATA1_03 | 2<br>0.81014      | 400 | (-) | RNSNNGATAANNGN | GTTGCTATTTCTT  |

|        |             |              |     |     |                |                 |
|--------|-------------|--------------|-----|-----|----------------|-----------------|
| M00126 | V\$GATA1_02 | 0.78218<br>8 | 403 | (-) | NNNNNGATANKGNN | GCTATTTTCTTTAC  |
| M00127 | V\$GATA1_03 | 0.81381<br>7 | 403 | (-) | RNSNNGATAANNGN | GCTATTTTCTTTAC  |
| M00127 | V\$GATA1_03 | 0.80450<br>8 | 422 | (+) | RNSNNGATAANNGN | GACTAGTTAACAGG  |
| M00127 | V\$GATA1_03 | 0.82386<br>1 | 424 | (-) | RNSNNGATAANNGN | CTAGTTAACAGGCT  |
| M00076 | V\$GATA2_01 | 0.79747<br>4 | 444 | (+) | NNNGATRNNN     | AAAGATCTTT      |
| M00076 | V\$GATA2_01 | 0.79747<br>4 | 444 | (-) | NNNGATRNNN     | AAAGATCTTT      |
| M00076 | V\$GATA2_01 | 0.78439<br>3 | 482 | (+) | NNNGATRNNN     | AAACATACCT      |
| M00076 | V\$GATA2_01 | 0.79837<br>6 | 521 | (-) | NNNGATRNNN     | TACTATGGGA      |
| M00076 | V\$GATA2_01 | 0.80108<br>3 | 582 | (+) | NNNGATRNNN     | TAGCATATTT      |
| M00126 | V\$GATA1_02 | 0.83687<br>5 | 595 | (+) | NNNNNGATANKGNN | CAAGAGATAAAAGAG |
| M00127 | V\$GATA1_03 | 0.84933<br>9 | 595 | (+) | RNSNNGATAANNGN | CAAGAGATAAAAGAG |
| M00128 | V\$GATA1_04 | 0.93259<br>8 | 596 | (+) | NNCWGATARNNNN  | AAGAGATAAAAGAG  |
| M00075 | V\$GATA1_01 | 0.79318<br>9 | 597 | (+) | SNNGATNNNN     | AGAGATAAAG      |
| M00076 | V\$GATA2_01 | 0.82814<br>6 | 597 | (+) | NNNGATRNNN     | AGAGATAAAG      |
| M00077 | V\$GATA3_01 | 0.93088<br>2 | 598 | (+) | NNGATARNG      | GAGATAAAG       |
| M00203 | V\$GATA_C   | 0.86424<br>4 | 599 | (+) | NGATAAGNMNN    | AGATAAAAGAGG    |
| M00075 | V\$GATA1_01 | 0.79664<br>4 | 615 | (+) | SNNGATNNNN     | TAGGATACAT      |
| M00076 | V\$GATA2_01 | 0.88001<br>8 | 615 | (+) | NNNGATRNNN     | TAGGATACAT      |
| M00076 | V\$GATA2_01 | 0.79521<br>9 | 678 | (-) | NNNGATRNNN     | GAACATCCAA      |
| M00203 | V\$GATA_C   | 0.84808<br>9 | 692 | (-) | NGATAAGNMNN    | CAAGTTTATCA     |
| M00126 | V\$GATA1_02 | 0.83312<br>5 | 693 | (-) | NNNNNGATANKGNN | AAGTTTATCATTTA  |
| M00128 | V\$GATA1_04 | 0.86366<br>4 | 693 | (-) | NNCWGATARNNNN  | AAGTTTATCATTT   |
| M00076 | V\$GATA2_01 | 0.79206<br>1 | 695 | (-) | NNNGATRNNN     | GTTTATCATT      |
| M00077 | V\$GATA3_01 | 0.82321<br>7 | 695 | (-) | NNGATARNG      | GTTTATCAT       |
| M00203 | V\$GATA_C   | 0.92233<br>6 | 699 | (-) | NGATAAGNMNN    | ATCATTTATCT     |
| M00126 | V\$GATA1_02 | 0.79875<br>4 | 700 | (-) | NNNNNGATANKGNN | TCATTTATCTTACA  |
| M00128 | V\$GATA1_04 | 0.90931<br>4 | 700 | (-) | NNCWGATARNNNN  | TCATTTATCTTAC   |
| M00076 | V\$GATA2_01 | 0.83942<br>3 | 702 | (-) | NNNGATRNNN     | ATTTATCTTA      |
| M00077 | V\$GATA3_01 | 0.84669<br>9 | 702 | (-) | NNGATARNG      | ATTTATCTT       |
| M00126 | V\$GATA1_02 | 0.83406<br>3 | 731 | (+) | NNNNNGATANKGNN | AAATAGATACATGA  |
| M00127 | V\$GATA1_03 | 0.81234<br>7 | 731 | (+) | RNSNNGATAANNGN | AAATAGATACATGA  |
| M00203 | V\$GATA_C   | 0.85585<br>6 | 735 | (+) | NGATAAGNMNN    | AGATACATGAA     |
| M00075 | V\$GATA1_01 | 0.79417<br>6 | 839 | (+) | SNNGATNNNN     | TGTGATCTGA      |

|        |             |                    |      |     |                |                |
|--------|-------------|--------------------|------|-----|----------------|----------------|
| M00076 | V\$GATA2_01 | 0.80333<br>8       | 839  | (+) | NNNGATRNNN     | TGTGATCTGA     |
| M00076 | V\$GATA2_01 | 0.81235<br>9       | 839  | (-) | NNNGATRNNN     | TGTGATCTGA     |
| M00075 | V\$GATA1_01 | 0.88005<br>9       | 1024 | (-) | SNNGATNNNN     | AGACATCTTG     |
| M00076 | V\$GATA2_01 | 0.89400<br>1       | 1024 | (-) | NNNGATRNNN     | AGACATCTTG     |
| M00126 | V\$GATA1_02 | 0.77843<br>8       | 1029 | (+) | NNNNNGATANKGNN | TCTTGGATAAAGTA |
| M00076 | V\$GATA2_01 | 0.78529<br>5       | 1031 | (+) | NNNGATRNNN     | TTGGATAAAG     |
| M00077 | V\$GATA3_01 | 0.84404<br>1       | 1032 | (+) | NNGATARNG      | TGGATAAAG      |
| M00203 | V\$GATA_C   | 0.89593            | 1033 | (+) | NGATAAGNMNN    | GGATAAAGTAA    |
| M00075 | V\$GATA1_01 | 0.87463<br>0.84979 | 1103 | (-) | SNNGATNNNN     | GCAAATCTGG     |
| M00076 | V\$GATA2_01 | 7                  | 1103 | (-) | NNNGATRNNN     | GCAAATCTGG     |
| M00075 | V\$GATA1_01 | 0.79170<br>8       | 1110 | (+) | SNNGATNNNN     | TGGGATTGAA     |
| M00076 | V\$GATA2_01 | 0.81912<br>5       | 1110 | (+) | NNNGATRNNN     | TGGGATTGAA     |
| M00077 | V\$GATA3_01 | 0.84537<br>0.88795 | 1111 | (+) | NNGATARNG      | GGGATTGAA      |
| M00075 | V\$GATA1_01 | 7                  | 1117 | (+) | SNNGATNNNN     | GAAGATGTGT     |
| M00076 | V\$GATA2_01 | 0.88678<br>4       | 1117 | (+) | NNNGATRNNN     | GAAGATGTGT     |
| M00075 | V\$GATA1_01 | 0.85093<br>8       | 1131 | (+) | SNNGATNNNN     | AGAGATGTTG     |
| M00076 | V\$GATA2_01 | 0.85475<br>9       | 1131 | (+) | NNNGATRNNN     | AGAGATGTTG     |
| M00077 | V\$GATA3_01 | 0.86530<br>8       | 1132 | (+) | NNGATARNG      | GAGATGTTG      |
| M00127 | V\$GATA1_03 | 0.80034<br>3       | 1135 | (+) | RNSNNGATAANNGN | ATGTTGATGGCAAG |
| M00075 | V\$GATA1_01 | 0.87166<br>8       | 1137 | (+) | SNNGATNNNN     | GTTGATGGCA     |
| M00076 | V\$GATA2_01 | 0.81326<br>1       | 1137 | (+) | NNNGATRNNN     | GTTGATGGCA     |
| M00127 | V\$GATA1_03 | 0.78172<br>5       | 1241 | (+) | RNSNNGATAANNGN | ACAAGGAGAAGTAG |
| M00127 | V\$GATA1_03 | 0.80132<br>3       | 1271 | (+) | RNSNNGATAANNGN | GGCAAGAGAATCTG |
| M00075 | V\$GATA1_01 | 0.82280<br>4       | 1276 | (-) | SNNGATNNNN     | GAGAATCTGA     |
| M00076 | V\$GATA2_01 | 0.84573<br>7       | 1276 | (-) | NNNGATRNNN     | GAGAATCTGA     |
| M00075 | V\$GATA1_01 | 0.84698<br>9       | 1293 | (-) | SNNGATNNNN     | GTAAATCACC     |
| M00076 | V\$GATA2_01 | 0.79747<br>4       | 1293 | (-) | NNNGATRNNN     | GTAAATCACC     |
| M00126 | V\$GATA1_02 | 0.81<br>0.89784    | 1302 | (+) | NNNNNGATANKGNN | CGAGAGATAAGTAC |
| M00127 | V\$GATA1_03 | 4                  | 1302 | (+) | RNSNNGATAANNGN | CGAGAGATAAGTAC |
| M00128 | V\$GATA1_04 | 0.92708<br>3       | 1303 | (+) | NNCWGATARNNNN  | GAGAGATAAGTAC  |
| M00075 | V\$GATA1_01 | 0.83366<br>2       | 1304 | (+) | SNNGATNNNN     | AGAGATAAGT     |
| M00076 | V\$GATA2_01 | 0.86152<br>5       | 1304 | (+) | NNNGATRNNN     | AGAGATAAGT     |
| M00077 | V\$GATA3_01 | 0.90474<br>1       | 1305 | (+) | NNGATARNG      | GAGATAAGT      |

|        |             |                   |      |     |                |                |
|--------|-------------|-------------------|------|-----|----------------|----------------|
| M00203 | V\$GATA_C   | 0.98384<br>6      | 1306 | (+) | NGATAAGNMNN    | AGATAAGTACA    |
| M00127 | V\$GATA1_03 | 0.79348<br>4      | 1326 | (+) | RNSNNGATAANNGN | GTAGAGAAAATAAG |
| M00127 | V\$GATA1_03 | 0.80769<br>2      | 1329 | (+) | RNSNNGATAANNGN | GAGAAAATAAGCAT |
| M00076 | V\$GATA2_01 | 0.81822<br>3      | 1337 | (+) | NNNGATRNNN     | AAGCATAGTG     |
| M00075 | V\$GATA1_01 | 0.78874<br>6      | 1347 | (+) | SNNGATNNNN     | TATGATCTCT     |
| M00076 | V\$GATA2_01 | 0.83761<br>8      | 1347 | (+) | NNNGATRNNN     | TATGATCTCT     |
| M00126 | V\$GATA1_02 | 0.7975<br>0.91499 | 1375 | (+) | NNNNNGATANKGNN | GGGGAGATAACATT |
| M00127 | V\$GATA1_03 | 3<br>0.86458      | 1375 | (+) | RNSNNGATAANNGN | GGGGAGATAACATT |
| M00128 | V\$GATA1_04 | 3<br>0.85044      | 1376 | (+) | NNCWGATARNNNN  | GGGAGATAACATT  |
| M00075 | V\$GATA1_01 | 4<br>0.89129      | 1377 | (+) | SNNGATNNNN     | GGAGATAACA     |
| M00076 | V\$GATA2_01 | 5<br>0.89986      | 1377 | (+) | NNNGATRNNN     | GGAGATAACA     |
| M00077 | V\$GATA3_01 | 7<br>0.85368      | 1378 | (+) | NNGATARNG      | GAGATAACA      |
| M00203 | V\$GATA_C   | 1<br>0.80559      | 1379 | (+) | NGATAAGNMNN    | AGATAACATTA    |
| M00076 | V\$GATA2_01 | 3<br>0.79152      | 1389 | (-) | NNNGATRNNN     | AGGCATGTGG     |
| M00127 | V\$GATA1_03 | 4<br>0.85340      | 1395 | (+) | RNSNNGATAANNGN | GTGGGGATGAAGAC |
| M00075 | V\$GATA1_01 | 6<br>0.86107      | 1397 | (+) | SNNGATNNNN     | GGGGATGAAG     |
| M00076 | V\$GATA2_01 | 4<br>0.83207      | 1397 | (+) | NNNGATRNNN     | GGGGATGAAG     |
| M00077 | V\$GATA3_01 | 8<br>0.86722      | 1398 | (+) | NNGATARNG      | GGGATGAAG      |
| M00075 | V\$GATA1_01 | 6<br>0.79386      | 1422 | (-) | SNNGATNNNN     | AACAATCTAG     |
| M00076 | V\$GATA2_01 | 6<br>0.83695      | 1422 | (-) | NNNGATRNNN     | AACAATCTAG     |
| M00077 | V\$GATA3_01 | 2<br>0.80303      | 1422 | (-) | NNGATARNG      | AACAATCTA      |
| M00127 | V\$GATA1_03 | 8<br>0.78931      | 1447 | (+) | RNSNNGATAANNGN | ATGTGGATCAATGG |
| M00127 | V\$GATA1_03 | 9<br>0.87468      | 1500 | (+) | RNSNNGATAANNGN | CTGGAAATAAAAGA |
| M00126 | V\$GATA1_02 | 8<br>0.89583      | 1507 | (+) | NNNNNGATANKGNN | TAAAAGATATGAGG |
| M00128 | V\$GATA1_04 | 3<br>0.78775      | 1508 | (+) | NNCWGATARNNNN  | AAAAGATATGAGG  |
| M00075 | V\$GATA1_01 | 9<br>0.83852      | 1509 | (+) | SNNGATNNNN     | AAAGATATGA     |
| M00076 | V\$GATA2_01 | 1<br>0.88746      | 1509 | (+) | NNNGATRNNN     | AAAGATATGA     |
| M00077 | V\$GATA3_01 | 1<br>0.81145      | 1510 | (+) | NNGATARNG      | AAGATATGA      |
| M00076 | V\$GATA2_01 | 7<br>0.81847      | 1511 | (-) | NNNGATRNNN     | AGATATGAGG     |
| M00127 | V\$GATA1_03 | 1<br>0.84964      | 1518 | (+) | RNSNNGATAANNGN | AGGAAGACAAACAT |
| M00203 | V\$GATA_C   | 3<br>0.82181      | 1522 | (+) | NGATAAGNMNN    | AGACAAACATT    |
| M00075 | V\$GATA1_01 | 6<br>0.79070      | 1536 | (-) | SNNGATNNNN     | GAAAACTACT     |
| M00076 | V\$GATA2_01 | 8                 | 1536 | (-) | NNNGATRNNN     | GAAAACTACT     |

|        |             |                    |      |     |                |                 |
|--------|-------------|--------------------|------|-----|----------------|-----------------|
| M00126 | V\$GATA1_02 | 0.785              | 1553 | (+) | NNNNNGATANKGNN | GTAGAGAAAAGATA  |
| M00126 | V\$GATA1_02 | 0.84375<br>0.84933 | 1558 | (+) | NNNNNGATANKGNN | GAAAAGATAAAAAAT |
| M00127 | V\$GATA1_03 | 9<br>0.92156       | 1558 | (+) | RNSNNGATAANNGN | GAAAAGATAAAAAAT |
| M00128 | V\$GATA1_04 | 9                  | 1559 | (+) | NNCWGATARNNNN  | AAAAGATAAAAAAT  |
| M00077 | V\$GATA3_01 | 0.8786<br>0.93911  | 1561 | (+) | NNGATARNG      | AAGATAAAA       |
| M00203 | V\$GATA_C   | 2<br>0.78564       | 1562 | (+) | NGATAAGNMNN    | AGATAAAAAATA    |
| M00127 | V\$GATA1_03 | 4<br>0.84649       | 1574 | (-) | RNSNNGATAANNGN | AGTATTACCTTCTT  |
| M00075 | V\$GATA1_01 | 6<br>0.90076       | 1607 | (+) | SNNGATNNNN     | TCAGATGCCC      |
| M00076 | V\$GATA2_01 | 7<br>0.77838       | 1607 | (+) | NNNGATRNNN     | TCAGATGCCC      |
| M00075 | V\$GATA1_01 | 1<br>0.81416       | 1671 | (-) | SNNGATNNNN     | TCTAATCCCA      |
| M00076 | V\$GATA2_01 | 3<br>0.85777       | 1671 | (-) | NNNGATRNNN     | TCTAATCCCA      |
| M00077 | V\$GATA3_01 | 6<br>0.79220       | 1671 | (-) | NNGATARNG      | TCTAATCCC       |
| M00075 | V\$GATA1_01 | 1<br>0.82454       | 1679 | (-) | SNNGATNNNN     | CAGAATCTAA      |
| M00077 | V\$GATA3_01 | 6<br>0.90556       | 1679 | (-) | NNGATARNG      | CAGAATCTA       |
| M00203 | V\$GATA_C   | 1<br>0.78123       | 1687 | (-) | NGATAAGNMNN    | AAGACATATCT     |
| M00076 | V\$GATA2_01 | 6<br>0.79093       | 1688 | (+) | NNNGATRNNN     | AGACATATCT      |
| M00126 | V\$GATA1_02 | 7<br>0.89797       | 1688 | (-) | NNNNNGATANKGNN | AGACATATCTGGCA  |
| M00128 | V\$GATA1_04 | 8<br>0.91312       | 1688 | (-) | NNCWGATARNNNN  | AGACATATCTGGC   |
| M00075 | V\$GATA1_01 | 9<br>0.91790       | 1690 | (-) | SNNGATNNNN     | ACATATCTGG      |
| M00076 | V\$GATA2_01 | 7<br>0.84980       | 1690 | (-) | NNNGATRNNN     | ACATATCTGG      |
| M00077 | V\$GATA3_01 | 1<br>0.84402       | 1690 | (-) | NNGATARNG      | ACATATCTG       |
| M00075 | V\$GATA1_01 | 8<br>0.79070       | 1737 | (-) | SNNGATNNNN     | ATCAATCACT      |
| M00076 | V\$GATA2_01 | 8<br>0.83517       | 1737 | (-) | NNNGATRNNN     | ATCAATCACT      |
| M00077 | V\$GATA3_01 | 9<br>0.85026       | 1737 | (-) | NNGATARNG      | ATCAATCAC       |
| M00203 | V\$GATA_C   | 4<br>0.83468       | 1756 | (-) | NGATAAGNMNN    | TGTAAGTATCT     |
| M00126 | V\$GATA1_02 | 8                  | 1757 | (-) | NNNNNGATANKGNN | GTAAGTATCTGTAA  |
| M00128 | V\$GATA1_04 | 0.81924<br>0.85291 | 1757 | (-) | NNCWGATARNNNN  | GTAAGTATCTGTA   |
| M00075 | V\$GATA1_01 | 2<br>0.88137       | 1759 | (-) | SNNGATNNNN     | AAGTATCTGT      |
| M00076 | V\$GATA2_01 | 1<br>0.78172       | 1759 | (-) | NNNGATRNNN     | AAGTATCTGT      |
| M00127 | V\$GATA1_03 | 5<br>0.83504       | 1794 | (+) | RNSNNGATAANNGN | ACACTCATAAGTAC  |
| M00203 | V\$GATA_C   | 2<br>0.78123       | 1798 | (+) | NGATAAGNMNN    | TCATAAGTACT     |
| M00076 | V\$GATA2_01 | 6<br>0.82498       | 1814 | (+) | NNNGATRNNN     | TAAGATGAAA      |
| M00077 | V\$GATA3_01 | 9                  | 1815 | (+) | NNGATARNG      | AAGATGAAA       |

|        |             |         |      |     |                |                |
|--------|-------------|---------|------|-----|----------------|----------------|
|        |             | 0.82802 |      |     |                |                |
| M00127 | V\$GATA1_03 | 5       | 1815 | (+) | RNSNNGATAANNGN | AAGATGAAAAGAGT |
| M00126 | V\$GATA1_02 | 0.7925  | 1831 | (+) | NNNNNGATANKGNN | AATAAGATATAGGC |
|        |             | 0.89460 |      |     |                |                |
| M00128 | V\$GATA1_04 | 8       | 1832 | (+) | NNCWGATARNNNN  | ATAAGATATAGGC  |
|        |             | 0.79121 |      |     |                |                |
| M00075 | V\$GATA1_01 | 4       | 1833 | (+) | SNNGATNNNN     | TAAGATATAG     |
|        |             | 0.86738 |      |     |                |                |
| M00076 | V\$GATA2_01 | 8       | 1833 | (+) | NNNGATRNNN     | TAAGATATAG     |
|        |             | 0.88170 |      |     |                |                |
| M00077 | V\$GATA3_01 | 1       | 1834 | (+) | NNGATARNG      | AAGATATAG      |
|        |             | 0.86921 |      |     |                |                |
| M00203 | V\$GATA_C   | 4       | 1835 | (+) | NGATAAGNMNN    | AGATATAGGCT    |
|        |             | 0.82116 |      |     |                |                |
| M00127 | V\$GATA1_03 | 6       | 1841 | (+) | RNSNNGATAANNGN | AGGCTGTTAGCTGA |
|        |             | 0.81638 |      |     |                |                |
| M00075 | V\$GATA1_01 | 7       | 1843 | (+) | SNNGATNNNN     | GCTGTTAGCT     |
|        |             | 0.80153 |      |     |                |                |
| M00076 | V\$GATA2_01 | 4       | 1843 | (+) | NNNGATRNNN     | GCTGTTAGCT     |
| M00075 | V\$GATA1_01 | 0.90079 | 1855 | (-) | SNNGATNNNN     | AAACATCTGG     |
|        |             | 0.88317 |      |     |                |                |
| M00076 | V\$GATA2_01 | 5       | 1855 | (-) | NNNGATRNNN     | AAACATCTGG     |
|        |             | 0.79470 |      |     |                |                |
| M00127 | V\$GATA1_03 | 8       | 1859 | (+) | RNSNNGATAANNGN | ATCTGGATGGCTGG |
|        |             | 0.88647 |      |     |                |                |
| M00075 | V\$GATA1_01 | 6       | 1861 | (+) | SNNGATNNNN     | CTGGATGGCT     |
|        |             | 0.86332 |      |     |                |                |
| M00076 | V\$GATA2_01 | 9       | 1861 | (+) | NNNGATRNNN     | CTGGATGGCT     |
|        |             | 0.77812 |      |     |                |                |
| M00126 | V\$GATA1_02 | 5       | 1879 | (-) | NNNNNGATANKGNN | AACATTAAGTTGAA |
|        |             | 0.80604 |      |     |                |                |
| M00076 | V\$GATA2_01 | 4       | 1931 | (-) | NNNGATRNNN     | CCGTATGATA     |
|        |             | 0.88265 |      |     |                |                |
| M00128 | V\$GATA1_04 | 9       | 1933 | (+) | NNCWGATARNNNN  | GTATGATAAAATG  |
|        |             | 0.79837 |      |     |                |                |
| M00076 | V\$GATA2_01 | 6       | 1934 | (+) | NNNGATRNNN     | TATGATAAAA     |
|        |             | 0.85511 |      |     |                |                |
| M00077 | V\$GATA3_01 | 7       | 1935 | (+) | NNGATARNG      | ATGATAAAA      |
|        |             | 0.84498 |      |     |                |                |
| M00203 | V\$GATA_C   | 3       | 1936 | (+) | NGATAAGNMNN    | TGATAAAATGT    |
|        |             | 0.78980 |      |     |                |                |
| M00076 | V\$GATA2_01 | 6       | 1985 | (-) | NNNGATRNNN     | TGCCATGAGG     |
|        |             | 0.83563 |      |     |                |                |
| M00075 | V\$GATA1_01 | 7       | 1999 | (+) | SNNGATNNNN     | CAGGATCTTG     |
|        |             | 0.86130 |      |     |                |                |
| M00075 | V\$GATA1_01 | 3       | 1999 | (-) | SNNGATNNNN     | CAGGATCTTG     |
|        |             | 0.86648 |      |     |                |                |
| M00076 | V\$GATA2_01 | 6       | 1999 | (+) | NNNGATRNNN     | CAGGATCTTG     |
|        |             | 0.86332 |      |     |                |                |
| M00076 | V\$GATA2_01 | 9       | 1999 | (-) | NNNGATRNNN     | CAGGATCTTG     |
|        |             | 0.77906 |      |     |                |                |
| M00126 | V\$GATA1_02 | 2       | 2011 | (+) | NNNNNGATANKGNN | TCCCTGATGAGGGA |
| M00075 | V\$GATA1_01 | 0.92695 | 2013 | (+) | SNNGATNNNN     | CCTGATGAGG     |
| M00076 | V\$GATA2_01 | 0.87641 | 2013 | (+) | NNNGATRNNN     | CCTGATGAGG     |
|        |             | 0.87151 |      |     |                |                |
| M00077 | V\$GATA3_01 | 1       | 2014 | (+) | NNGATARNG      | CTGATGAGG      |
|        |             | 0.77393 |      |     |                |                |
| M00075 | V\$GATA1_01 | 9       | 2020 | (-) | SNNGATNNNN     | AGGGATCAAA     |
|        |             | 0.80031 |      |     |                |                |
| M00126 | V\$GATA1_02 | 2       | 2055 | (+) | NNNNNGATANKGNN | TCTTAGATATTGT  |
|        |             | 0.78331 |      |     |                |                |
| M00075 | V\$GATA1_01 | 7       | 2057 | (+) | SNNGATNNNN     | TTAGATATT      |



|        |             |         |      |     |                |                |
|--------|-------------|---------|------|-----|----------------|----------------|
| M00076 | V\$GATA2_01 | 0.81281 | 2057 | (+) | NNNGATRNNN     | TTAGATATTT     |
| M00126 | V\$GATA1_02 | 0.9075  | 2073 | (-) | NNNNNGATANKGNN | TACACTATCTTTGG |
| M00127 | V\$GATA1_03 | 0.80965 | 2073 | (-) | RNSNNGATAANNGN | TACACTATCTTTGG |
| M00075 | V\$GATA1_01 | 2       | 2075 | (-) | SNNGATNNNN     | CACTATCTTT     |
| M00076 | V\$GATA2_01 | 0.8692  | 2075 | (-) | NNNGATRNNN     | CACTATCTTT     |
| M00077 | V\$GATA3_01 | 0.91159 | 2075 | (-) | NNNGATRNNN     | CACTATCTTT     |
| M00203 | V\$GATA_C   | 2       | 2075 | (-) | NNGATARNG      | CACTATCTT      |
| M00126 | V\$GATA1_02 | 6       | 2131 | (+) | NGATAAGNMNN    | TGACAAGTAAT    |
| M00203 | V\$GATA_C   | 0.87853 | 2141 | (-) | NNNNNGATANKGNN | TACACTATTCCTC  |
| M00127 | V\$GATA1_03 | 4       | 2148 | (-) | NGATAAGNMNN    | TTTCCTCATCT    |
| M00075 | V\$GATA1_01 | 0.77406 | 2149 | (-) | RNSNNGATAANNGN | TTCTCATCTTCCC  |
| M00076 | V\$GATA2_01 | 0.83162 | 2151 | (-) | SNNGATNNNN     | CCTCATCTTC     |
| M00077 | V\$GATA3_01 | 5       | 2151 | (-) | NNNGATRNNN     | CCTCATCTTC     |
| M00075 | V\$GATA1_01 | 0.82680 | 2151 | (-) | NNGATARNG      | CCTCATCTT      |
| M00076 | V\$GATA2_01 | 1       | 2191 | (-) | SNNGATNNNN     | CCTCATCCTT     |
| M00077 | V\$GATA3_01 | 0.88104 | 2191 | (-) | NNNGATRNNN     | CCTCATCCTT     |
| M00127 | V\$GATA1_03 | 0.88498 | 2191 | (-) | NNGATARNG      | CCTCATCCT      |
| M00203 | V\$GATA_C   | 0.90075 | 2191 | (-) | RNSNNGATAANNGN | AGAGAGGTAAATAC |
| M00126 | V\$GATA1_02 | 3       | 2228 | (+) | NGATAAGNMNN    | TAGTACTATCT    |
| M00127 | V\$GATA1_03 | 0.81194 | 2268 | (-) | NNNNNGATANKGNN | AGTACTATCTGCCT |
| M00128 | V\$GATA1_04 | 5       | 2269 | (-) | RNSNNGATAANNGN | AGTACTATCTGCCT |
| M00075 | V\$GATA1_01 | 0.85250 | 2269 | (-) | NNCWGATARNNNN  | AGTACTATCTGCC  |
| M00076 | V\$GATA2_01 | 0.85556 | 2271 | (-) | SNNGATNNNN     | TACTATCTGC     |
| M00077 | V\$GATA3_01 | 0.78564 | 2271 | (-) | NNNGATRNNN     | TACTATCTGC     |
| M00127 | V\$GATA1_03 | 4       | 2271 | (-) | NNGATARNG      | TACTATCTG      |
| M00126 | V\$GATA1_02 | 0.80153 | 2279 | (-) | NNNGATRNNN     | GCCTATGTGT     |
| M00127 | V\$GATA1_03 | 0.83733 | 2285 | (+) | RNSNNGATAANNGN | GTGTAGAAAATCGC |
| M00075 | V\$GATA1_01 | 5       | 2290 | (-) | SNNGATNNNN     | GAAAATCGCA     |
| M00076 | V\$GATA2_01 | 0.82428 | 2290 | (-) | NNNGATRNNN     | GAAAATCGCA     |
| M00127 | V\$GATA1_03 | 0.83130 | 2296 | (-) | RNSNNGATAANNGN | CGCATTACCAACAT |
| M00126 | V\$GATA1_02 | 0.79201 | 2317 | (+) | NNNNNGATANKGNN | GTATAAATAATGCA |
| M00075 | V\$GATA1_01 | 0.79718 | 2329 | (-) | SNNGATNNNN     | CACAATCTCA     |
| M00076 | V\$GATA2_01 | 8       | 2329 | (-) | NNNGATRNNN     | CACAATCTCA     |
| M00077 | V\$GATA3_01 | 0.88252 | 2329 | (-) | NNGATARNG      | CACAATCTC      |
| M00075 | V\$GATA1_01 | 0.88768 | 2336 | (+) | SNNGATNNNN     | TCAGATTTTT     |

|        |             |                    |      |     |                                        |                                                |
|--------|-------------|--------------------|------|-----|----------------------------------------|------------------------------------------------|
| M00076 | V\$GATA2_01 | 0.83806<br>9       | 2336 | (+) | NNNGATRNNN                             | TCAGATTTTT                                     |
| M00203 | V\$GATA_C   | 0.83845<br>9       | 2375 | (-) | NGATAAGNMNN                            | ATCCACTATCT                                    |
| M00126 | V\$GATA1_02 | 0.89406<br>3       | 2376 | (-) | NNNNNGATANKGNN                         | TCCACTATCTCAGT                                 |
| M00127 | V\$GATA1_03 | 0.82092<br>1       | 2376 | (-) | RNSNNGATAANNGN                         | TCCACTATCTCAGT                                 |
| M00128 | V\$GATA1_04 | 0.81770<br>8       | 2376 | (-) | NNCWGATARNNNN                          | TCCACTATCTCAG                                  |
| M00075 | V\$GATA1_01 | 0.90621<br>9       | 2378 | (-) | SNNGATNNNN                             | CACTATCTCA                                     |
| M00076 | V\$GATA2_01 | 0.95218<br>8       | 2378 | (-) | NNNGATRNNN                             | CACTATCTCA                                     |
| M00077 | V\$GATA3_01 | 0.97917<br>6       | 2378 | (-) | NNGATARNG                              | CACTATCTC                                      |
| M00075 | V\$GATA1_01 | 0.80059<br>2       | 2389 | (-) | SNNGATNNNN                             | TAGTATCCTA                                     |
| M00076 | V\$GATA2_01 | 0.89039<br>2       | 2389 | (-) | NNNGATRNNN                             | TAGTATCCTA                                     |
| M00076 | V\$GATA2_01 | 0.80469<br>1       | 2394 | (-) | NNNGATRNNN                             | TCCTATGGGA                                     |
| M00126 | V\$GATA1_02 | 0.77218<br>8       | 2437 | (-) | NNNNNGATANKGNN                         | TGTACCATCTGTAC                                 |
| M00075 | V\$GATA1_01 | 0.84304<br>0.84844 | 2439 | (-) | SNNGATNNNN                             | TACCATCTGT                                     |
| M00076 | V\$GATA2_01 | 0.86752<br>4       | 2439 | (-) | NNNGATRNNN                             | TACCATCTGT                                     |
| M00077 | V\$GATA3_01 | 0.80700<br>3       | 2439 | (-) | NNGATARNG                              | TACCATCTG                                      |
| M00075 | V\$GATA1_01 | 0.82543<br>9       | 2448 | (-) | SNNGATNNNN                             | TACCATCAAT                                     |
| M00077 | V\$GATA3_01 | 0.81885<br>2       | 2448 | (-) | NNGATARNG                              | TACCATCAA                                      |
| M00075 | V\$GATA1_01 | 0.81641<br>5       | 2452 | (-) | SNNGATNNNN                             | ATCAATCCCT                                     |
| M00076 | V\$GATA2_01 | 0.80078<br>9       | 2452 | (-) | NNNGATRNNN                             | ATCAATCCCT                                     |
| M00162 | V\$OCT1_06  | 0.87198<br>1       | 47   | (-) | CWNAWTKWSATRYN                         | AGAATTCATTTTCT                                 |
| M00137 | V\$OCT1_03  | 7                  | 56   | (+) | NNNRTAATNANNN<br>NNNNNNNWATGCAAATNNNWN | TTTCTAATCATGC<br>TTCTAATCATGCAGAT-<br>TTCTAGG  |
| M00138 | V\$OCT1_04  | 0.83187<br>0.82392 | 57   | (+) | NNNNWTATGCAAATNTNNN                    | CTAATCATGCAGATTTC-<br>TA                       |
| M00135 | V\$OCT1_01  | 0.79263<br>2       | 59   | (+) | NNGAATATKCANNNN                        | ATCATGCAGATTCT                                 |
| M00136 | V\$OCT1_02  | 0.79987<br>7       | 62   | (-) | TNTATGNTAATT<br>NNNNNNNWATGCAAATNNNWN  | ATCATGCAGATT<br>TTCTAG-<br>GAATTCAAATCCACTAT   |
| M00248 | V\$OCT1_07  | 0.78419<br>1       | 73   | (+) | NW                                     | CTAG-<br>GAATTCAAATCCACT                       |
| M00138 | V\$OCT1_04  | 0.73235<br>4       | 75   | (+) | NNNNATGCAAATNAN                        | AGGAATTCAAATCCA                                |
| M00135 | V\$OCT1_01  | 0.83051<br>3       | 77   | (+) | CWNAWTKWSATRYN                         | GGAATTCAAATCCA                                 |
| M00195 | V\$OCT1_Q6  | 0.80117<br>2       | 78   | (-) | CWNAWTKWSATRYN                         | CAAATCCACTATTG                                 |
| M00162 | V\$OCT1_06  | 0.82148<br>4       | 84   | (-) | CWNAWTKWSATRYN                         | CACTATTGGTTTAA                                 |
| M00162 | V\$OCT1_06  | 0.82148<br>4       | 90   | (+) | CWNAWTKWSATRYN                         | CAAACCACAAAATT<br>CCACAAAATTAG-<br>CATGCCATTAA |
| M00162 | V\$OCT1_06  | 0.80039<br>1       | 107  | (-) | CWNAWTKWSATRYN                         |                                                |
| M00138 | V\$OCT1_04  | 0.81890<br>4       | 111  | (-) | NNNNNNNWATGCAAATNNNWN<br>NW            |                                                |

|        |            |              |     |     |                             |                              |
|--------|------------|--------------|-----|-----|-----------------------------|------------------------------|
| M00135 | V\$OCT1_01 | 0.81648<br>2 | 113 | (-) | NNNNWTATGCAAATNTNNN         | ACAAAATTAG-<br>CATGCCATT     |
| M00161 | V\$OCT1_05 | 0.86900<br>2 | 115 | (+) | MKNATTTGCATAYY              | AAAATTAGCATGCC               |
| M00162 | V\$OCT1_06 | 0.85546<br>9 | 115 | (+) | CWNAWTKWSATRYN              | AAAATTAGCATGCC               |
| M00248 | V\$OCT1_07 | 0.91286<br>8 | 117 | (-) | TNTATGNTAATT                | AATTAGCATGCC                 |
| M00162 | V\$OCT1_06 | 0.88906<br>2 | 121 | (-) | CWNAWTKWSATRYN              | AGCATGCCATTAAA               |
| M00162 | V\$OCT1_06 | 0.82929<br>7 | 125 | (+) | CWNAWTKWSATRYN              | TGCCATTAAATACT               |
| M00138 | V\$OCT1_04 | 0.78293<br>6 | 130 | (-) | NNNNNNNWATGCAAATNNNWN<br>NW | TTAAATACTATA-<br>TATAACAACC  |
| M00138 | V\$OCT1_04 | 0.81472<br>2 | 131 | (+) | NNNNNNNWATGCAAATNNNWN<br>NW | TAAATACTATA-<br>TATAACAACCA  |
| M00248 | V\$OCT1_07 | 0.79626<br>9 | 132 | (-) | TNTATGNTAATT                | AAATACTATATA                 |
| M00195 | V\$OCT1_Q6 | 0.79203<br>1 | 137 | (+) | NNNNATGCAAATNAN             | CTATATATAACAAC               |
| M00137 | V\$OCT1_03 | 0.91426<br>3 | 161 | (-) | NNNRTAATNANNN               | AGATCATTATCCA                |
| M00136 | V\$OCT1_02 | 0.81889<br>6 | 163 | (+) | NNGAATATKCANNNN             | ATCATTATCCATTCA              |
| M00162 | V\$OCT1_06 | 0.81601<br>6 | 212 | (-) | CWNAWTKWSATRYN              | AAAAGGTAAGAATC               |
| M00162 | V\$OCT1_06 | 0.89062<br>5 | 220 | (-) | CWNAWTKWSATRYN              | AGAATCTCAGATAT               |
| M00162 | V\$OCT1_06 | 0.83437<br>5 | 221 | (+) | CWNAWTKWSATRYN              | GAATCTCAGATATA               |
| M00137 | V\$OCT1_03 | 0.84156<br>5 | 229 | (+) | NNNRTAATNANNN               | GATATAATTTCAT                |
| M00162 | V\$OCT1_06 | 0.81210<br>9 | 231 | (+) | CWNAWTKWSATRYN              | TATAATTTATTGT                |
| M00137 | V\$OCT1_03 | 0.84670<br>1 | 235 | (-) | NNNRTAATNANNN               | ATTTATTGTATC                 |
| M00137 | V\$OCT1_03 | 0.86843<br>1 | 254 | (-) | NNNRTAATNANNN               | TCATCTTTATTTC                |
| M00162 | V\$OCT1_06 | 0.86015<br>6 | 258 | (+) | CWNAWTKWSATRYN              | CTTTATTTAGACT                |
| M00135 | V\$OCT1_01 | 0.73693<br>2 | 290 | (-) | NNNNWTATGCAAATNTNNN         | AACATAATTGCTTAAAA-<br>TA     |
| M00137 | V\$OCT1_03 | 0.84314<br>5 | 290 | (+) | NNNRTAATNANNN               | AACATAATTGCTT                |
| M00137 | V\$OCT1_03 | 0.85302<br>3 | 291 | (-) | NNNRTAATNANNN               | ACATAATTGCTTA                |
| M00162 | V\$OCT1_06 | 0.80429<br>7 | 292 | (+) | CWNAWTKWSATRYN              | CATAATTGCTTAAA               |
| M00135 | V\$OCT1_01 | 0.74647<br>1 | 347 | (+) | NNNNWTATGCAAATNTNNN         | TATTTTCAGCAAATTTGTT          |
| M00138 | V\$OCT1_04 | 0.80008<br>4 | 355 | (+) | NNNNNNNWATGCAAATNNNWN<br>NW | GCAAATTTGTTAAAA-<br>TAGAAGCA |
| M00137 | V\$OCT1_03 | 0.84235<br>5 | 378 | (+) | NNNRTAATNANNN               | ACTATAAAGATTT                |
| M00137 | V\$OCT1_03 | 0.88305<br>9 | 407 | (-) | NNNRTAATNANNN               | TTTTCTTTACCAC                |
| M00162 | V\$OCT1_06 | 0.90351<br>6 | 437 | (-) | CWNAWTKWSATRYN              | TGTATTAAGATC                 |
| M00138 | V\$OCT1_04 | 0.86835<br>9 | 454 | (-) | NNNNNNNWATGCAAATNNNWN<br>NW | TCTTGAATTAATA-<br>TATTTCAATT |
| M00162 | V\$OCT1_06 | 0.89843<br>7 | 456 | (+) | CWNAWTKWSATRYN              | TTGAATTAATATT                |
| M00162 | V\$OCT1_06 | 0.80319<br>4 | 457 | (-) | CWNAWTKWSATRYN              | TGAATTAATATT                 |
| M00136 | V\$OCT1_02 | 0.80319<br>4 | 458 | (-) | NNGAATATKCANNNN             | GAATTAATATTTTC               |

|        |            |                    |     |     |                             |                              |
|--------|------------|--------------------|-----|-----|-----------------------------|------------------------------|
| M00138 | V\$OCT1_04 | 0.78398<br>2       | 460 | (-) | NNNNNNNWATGCAAATNNNWN<br>NW | ATTAAATATTTTCAATTT-<br>GATTA |
| M00138 | V\$OCT1_04 | 0.81095<br>8       | 461 | (-) | NNNNNNNWATGCAAATNNNWN<br>NW | TTAAATATTTTCAATTT-<br>GATTAA |
| M00162 | V\$OCT1_06 | 0.84726<br>6       | 464 | (+) | CWNAWTKWSATRYN              | AATATTTTCAATTT               |
| M00162 | V\$OCT1_06 | 0.80078<br>1       | 465 | (+) | CWNAWTKWSATRYN              | ATATTTTCAATTTG               |
| M00138 | V\$OCT1_04 | 0.81597<br>7       | 467 | (-) | NNNNNNNWATGCAAATNNNWN<br>NW | ATTTTCAATTTGAT-<br>TAAACATAC |
| M00135 | V\$OCT1_01 | 0.74532<br>6       | 469 | (-) | NNNNWTATGCAAATNTNNN         | TTTCAATTTGATTAAACAT          |
| M00138 | V\$OCT1_04 | 0.80635<br>7       | 473 | (-) | NNNNNNNWATGCAAATNNNWN<br>NW | AATTTGATTAAACAT-<br>ACCTCAGC |
| M00248 | V\$OCT1_07 | 0.81450<br>1       | 473 | (-) | TNTATGNTAATT                | AATTTGATTAAA                 |
| M00137 | V\$OCT1_03 | 0.85657<br>8       | 474 | (-) | NNNRATATNANNN               | ATTTGATTAAACA                |
| M00162 | V\$OCT1_06 | 0.82148<br>4       | 507 | (+) | CWNAWTKWSATRYN              | GCACATTTAATTTA               |
| M00162 | V\$OCT1_06 | 0.93242<br>2       | 508 | (-) | CWNAWTKWSATRYN              | CACATTTAATTTAT               |
| M00135 | V\$OCT1_01 | 0.75104<br>9       | 519 | (+) | NNNNWTATGCAAATNTNNN         | TATACTATGGGAATTT-<br>GAA     |
| M00248 | V\$OCT1_07 | 0.88446            | 522 | (+) | TNTATGNTAATT                | ACTATGGGAATT                 |
| M00138 | V\$OCT1_04 | 0.87432<br>0.86531 | 524 | (-) | NNNNNNNWATGCAAATNNNWN<br>NW | TATGGGAATTTGAA-<br>TAATTGTTA |
| M00135 | V\$OCT1_01 | 0.87879<br>9       | 526 | (-) | NNNNWTATGCAAATNTNNN         | TGGGAATTTGAA-<br>TAATTGT     |
| M00161 | V\$OCT1_05 | 0.81914<br>8       | 528 | (+) | MKNATTTGCATAYY              | GGAATTTGAATAAT               |
| M00162 | V\$OCT1_06 | 0.82695<br>1       | 528 | (+) | CWNAWTKWSATRYN              | GGAATTTGAATAAT               |
| M00162 | V\$OCT1_06 | 0.84579<br>3       | 528 | (-) | CWNAWTKWSATRYN              | GGAATTTGAATAAT               |
| M00195 | V\$OCT1_Q6 | 0.85002<br>7       | 528 | (-) | NNNNATGCAAATNAN             | GGAATTTGAATAATT              |
| M00136 | V\$OCT1_02 | 0.89315<br>7       | 530 | (-) | NNGAATATKCANNNN             | AATTTGAATAATTGT              |
| M00248 | V\$OCT1_07 | 0.84709<br>2       | 530 | (-) | TNTATGNTAATT                | AATTTGAATAAT                 |
| M00137 | V\$OCT1_03 | 0.77813<br>6       | 534 | (+) | NNNRATATNANNN               | TGAATAATTGTTA                |
| M00135 | V\$OCT1_01 | 0.84677<br>8       | 575 | (-) | NNNNWTATGCAAATNTNNN         | ATAGAGCTAG-<br>CATATTTAG     |
| M00136 | V\$OCT1_02 | 0.79047<br>9       | 579 | (-) | NNGAATATKCANNNN             | AGCTAGCATATTTAG              |
| M00136 | V\$OCT1_02 | 0.86724<br>1       | 582 | (+) | NNGAATATKCANNNN             | TAGCATATTTAGTCA              |
| M00137 | V\$OCT1_03 | 0.73769<br>6       | 598 | (+) | NNNRATATNANNN               | GAGATAAAGAGGG                |
| M00135 | V\$OCT1_01 | 0.82617<br>6       | 619 | (+) | NNNNWTATGCAAATNTNNN         | ATACATGTGCTATT-<br>GAAA      |
| M00162 | V\$OCT1_06 | 0.84726<br>2       | 619 | (+) | CWNAWTKWSATRYN              | ATACATGTGCTATT               |
| M00162 | V\$OCT1_06 | 0.81328<br>6       | 628 | (+) | CWNAWTKWSATRYN              | CTATTTGAAAGGTA               |
| M00162 | V\$OCT1_06 | 0.81116<br>1       | 629 | (-) | CWNAWTKWSATRYN              | TATTTGAAAGGTAT               |
| M00138 | V\$OCT1_04 | 0.82656<br>7       | 633 | (+) | NNNNNNNWATGCAAATNNNWN<br>NW | TGAAAGGTATTTATAAAA<br>GAAGA  |
| M00162 | V\$OCT1_06 | 0.79569<br>2       | 638 | (-) | CWNAWTKWSATRYN              | GGTATTTATAAAAAG              |
| M00138 | V\$OCT1_04 | 2                  | 650 | (+) | NNNNNNNWATGCAAATNNNWN<br>NW | AGAAGAG-<br>TATATTTATTTAAATT |

|        |            |         |     |     |                       |                      |
|--------|------------|---------|-----|-----|-----------------------|----------------------|
|        |            | 0.80400 |     |     |                       |                      |
| M00136 | V\$OCT1_02 | 6       | 654 | (+) | NNGAATATKCANNNN       | GAGTATATTTATTAA      |
|        |            | 0.83605 |     |     | NNNNNNNWATGCAAATNNNWN | GTATATTTATTAAAAATT-  |
| M00138 | V\$OCT1_04 | 2       | 656 | (+) | NW                    | GCTCAG               |
|        |            | 0.80740 |     |     | NNNNNNNWATGCAAATNNNWN | TATATTTATTAAAAATT-   |
| M00138 | V\$OCT1_04 | 3       | 657 | (-) | NW                    | GCTCAGA              |
|        |            | 0.75333 |     |     |                       |                      |
| M00135 | V\$OCT1_01 | 8       | 658 | (+) | NNNNWTATGCAAATNTNNN   | ATATTTATTAAAAATTGCTC |
|        |            | 0.83400 |     |     |                       |                      |
| M00248 | V\$OCT1_07 | 5       | 661 | (+) | TNTATGNTAATT          | TTTATTAAAAATT        |
|        |            | 0.78021 |     |     | NNNNNNNWATGCAAATNNNWN | CTCAGAACATCCAAATTT   |
| M00138 | V\$OCT1_04 | 7       | 674 | (+) | NW                    | CAAGT                |
|        |            | 0.81972 |     |     |                       | CAGAACATCCAAATTTCA   |
| M00135 | V\$OCT1_01 | 5       | 676 | (+) | NNNNWTATGCAAATNTNNN   | A                    |
|        |            | 0.79615 |     |     |                       |                      |
| M00136 | V\$OCT1_02 | 6       | 676 | (+) | NNGAATATKCANNNN       | CAGAACATCCAAATT      |
|        |            | 0.82287 |     |     |                       |                      |
| M00195 | V\$OCT1_Q6 | 1       | 678 | (+) | NNNNATGCAAATNAN       | GAACATCCAAATTTTC     |
|        |            | 0.9375  |     |     |                       |                      |
| M00162 | V\$OCT1_06 | 0.80093 | 679 | (-) | CWNAWKWSATRYN         | AACATCCAAATTTTC      |
|        |            | 3       |     |     |                       |                      |
| M00248 | V\$OCT1_07 | 3       | 679 | (+) | TNTATGNTAATT          | AACATCCAAATT         |
|        |            | 0.825   |     |     |                       |                      |
| M00162 | V\$OCT1_06 | 0.88554 | 684 | (+) | CWNAWKWSATRYN         | CCAAATTTCAAGTT       |
|        |            | 7       |     |     |                       |                      |
| M00162 | V\$OCT1_06 | 0.79924 | 685 | (-) | CWNAWKWSATRYN         | CAAATTTCAAGTTT       |
|        |            | 0.79924 |     |     | NNNNNNNWATGCAAATNNNWN | TTTCAAGTTTATCATTTAT  |
| M00138 | V\$OCT1_04 | 7       | 689 | (-) | NW                    | CTTA                 |
|        |            | 0.82148 |     |     |                       |                      |
| M00162 | V\$OCT1_06 | 4       | 693 | (+) | CWNAWKWSATRYN         | AAGTTTATCATTTA       |
|        |            | 0.83945 |     |     |                       |                      |
| M00162 | V\$OCT1_06 | 3       | 705 | (-) | CWNAWKWSATRYN         | TATCTTACAATATT       |
|        |            | 0.80928 |     |     | NNNNNNNWATGCAAATNNNWN | TTACAATATTTCAAAAA-   |
| M00138 | V\$OCT1_04 | 5       | 709 | (+) | NW                    | TATTAA               |
|        |            | 0.90351 |     |     |                       |                      |
| M00162 | V\$OCT1_06 | 6       | 713 | (-) | CWNAWKWSATRYN         | AATATTTCAAAAAT       |
|        |            | 0.81835 |     |     |                       |                      |
| M00162 | V\$OCT1_06 | 9       | 715 | (-) | CWNAWKWSATRYN         | TATTTCAAAAATAT       |
|        |            | 0.87243 |     |     | NNNNNNNWATGCAAATNNNWN | TCAAAAATATTAAAA-     |
| M00138 | V\$OCT1_04 | 8       | 719 | (+) | NW                    | TAGATACA             |
|        |            | 0.80112 |     |     | NNNNNNNWATGCAAATNNNWN | CAAAAATATTAAAA-      |
| M00138 | V\$OCT1_04 | 9       | 720 | (-) | NW                    | TAGATACAT            |
|        |            | 0.74265 |     |     |                       | AAAAATATTAAATAGA-    |
| M00135 | V\$OCT1_01 | 5       | 721 | (+) | NNNNWTATGCAAATNTNNN   | TA                   |
|        |            | 0.80590 |     |     |                       |                      |
| M00136 | V\$OCT1_02 | 1       | 721 | (+) | NNGAATATKCANNNN       | AAAAATATTAAATA       |
|        |            | 0.83654 |     |     |                       |                      |
| M00248 | V\$OCT1_07 | 9       | 726 | (-) | TNTATGNTAATT          | TATTAAAATAGA         |
|        |            | 0.80390 |     |     |                       |                      |
| M00162 | V\$OCT1_06 | 6       | 728 | (+) | CWNAWKWSATRYN         | TTAAAATAGATACA       |
|        |            | 0.91132 |     |     |                       |                      |
| M00162 | V\$OCT1_06 | 8       | 737 | (+) | CWNAWKWSATRYN         | ATACATGAAATACA       |
|        |            | 0.94531 |     |     |                       |                      |
| M00162 | V\$OCT1_06 | 2       | 738 | (-) | CWNAWKWSATRYN         | TACATGAAATACAG       |
|        |            | 0.80078 |     |     |                       |                      |
| M00162 | V\$OCT1_06 | 1       | 755 | (-) | CWNAWKWSATRYN         | TAAATTAAAGAGAA       |
|        |            | 0.82929 |     |     |                       |                      |
| M00162 | V\$OCT1_06 | 7       | 768 | (+) | CWNAWKWSATRYN         | AAGTATTTTATTTT       |
|        |            | 0.89453 |     |     |                       |                      |
| M00162 | V\$OCT1_06 | 1       | 769 | (-) | CWNAWKWSATRYN         | AGTATTTTATTTTG       |
|        |            | 0.81725 |     |     |                       |                      |
| M00248 | V\$OCT1_07 | 7       | 769 | (+) | TNTATGNTAATT          | AGTATTTTATTT         |
|        |            | 0.80865 |     |     | NNNNNNNWATGCAAATNNNWN | TATTTTATTTT-         |
| M00138 | V\$OCT1_04 | 7       | 771 | (-) | NW                    | GTAAAAAAAAT          |
|        |            | 0.81911 |     |     | NNNNNNNWATGCAAATNNNWN | ATTTTATTTT-          |
| M00138 | V\$OCT1_04 | 3       | 772 | (+) | NW                    | GTAAAAAAAAT          |

|        |            |         |     |     |                       |                     |
|--------|------------|---------|-----|-----|-----------------------|---------------------|
|        |            | 0.84907 |     |     |                       |                     |
| M00137 | V\$OCT1_03 | 2       | 779 | (+) | NNNRTAATNANNN         | TTTGTAAAAAAA        |
|        |            | 0.81406 |     |     |                       |                     |
| M00162 | V\$OCT1_06 | 2       | 789 | (-) | CWNAWTKWSATRYN        | AAAAATTCTAGGTTG     |
|        |            | 0.82929 |     |     |                       |                     |
| M00162 | V\$OCT1_06 | 7       | 827 | (+) | CWNAWTKWSATRYN        | AACAATGAAAAATG      |
|        |            | 0.86835 |     |     |                       |                     |
| M00162 | V\$OCT1_06 | 9       | 834 | (+) | CWNAWTKWSATRYN        | AAAAATGTGATCTG      |
|        |            | 0.80039 |     |     |                       |                     |
| M00162 | V\$OCT1_06 | 1       | 842 | (-) | CWNAWTKWSATRYN        | GATCTGACAGAAAT      |
|        |            | 0.90833 |     |     |                       |                     |
| M00137 | V\$OCT1_03 | 7       | 876 | (+) | NNNRTAATNANNN         | TCAGTAATGAAAT       |
|        |            | 0.84257 |     |     |                       |                     |
| M00162 | V\$OCT1_06 | 8       | 878 | (+) | CWNAWTKWSATRYN        | AGTAATGAAATGGC      |
|        |            | 0.82559 |     |     | NNNNNNNWATGCAAATNNNWN | CTAAAAAATTGGCATA-   |
| M00138 | V\$OCT1_04 | 6       | 891 | (-) | NW                    | TAAAAATG            |
|        |            | 0.78000 |     |     | NNNNNNNWATGCAAATNNNWN | TTAAAAAATTGGCATA-   |
| M00138 | V\$OCT1_04 | 8       | 892 | (+) | NW                    | TAAAAATGC           |
|        |            |         |     |     |                       | TAAAAAATTGGCATA-    |
| M00135 | V\$OCT1_01 | 0.85826 | 893 | (-) | NNNNWTATGCAAATNTNNN   | TAAAA               |
|        |            |         |     |     |                       |                     |
| M00162 | V\$OCT1_06 | 0.9375  | 895 | (+) | CWNAWTKWSATRYN        | AAAATTGGCATATA      |
|        |            | 0.79039 |     |     |                       |                     |
| M00195 | V\$OCT1_Q6 | 3       | 895 | (-) | NNNNATGCAAATNAN       | AAAATTGGCATATAA     |
|        |            | 0.78722 |     |     |                       |                     |
| M00136 | V\$OCT1_02 | 3       | 897 | (-) | NNGAATATKCANNNN       | AATTGGCATATAAAAA    |
|        |            | 0.90290 |     |     |                       |                     |
| M00248 | V\$OCT1_07 | 4       | 897 | (-) | TNTATGNTAATT          | AATTGGCATATA        |
|        |            |         |     |     |                       | CATA-               |
|        |            | 0.85487 |     |     | NNNNNNNWATGCAAATNNNWN | TAAAAATGCTAATTATAAA |
| M00138 | V\$OCT1_04 | 2       | 903 | (+) | NW                    | A                   |
|        |            | 0.82048 |     |     |                       | TA-                 |
| M00135 | V\$OCT1_01 | 8       | 905 | (+) | NNNNWTATGCAAATNTNNN   | TAAAAATGCTAATTATAA  |
|        |            | 0.77449 |     |     |                       |                     |
| M00136 | V\$OCT1_02 | 9       | 905 | (+) | NNGAATATKCANNNN       | TATAAAATGCTAATT     |
|        |            | 0.86162 |     |     |                       |                     |
| M00195 | V\$OCT1_Q6 | 7       | 907 | (+) | NNNNATGCAAATNAN       | TAAAAATGCTAATTAT    |
|        |            | 0.95915 |     |     |                       |                     |
| M00161 | V\$OCT1_05 | 7       | 908 | (-) | MKNATTTGCATAYY        | AAAATGCTAATTAT      |
|        |            | 0.83984 |     |     |                       |                     |
| M00162 | V\$OCT1_06 | 4       | 908 | (-) | CWNAWTKWSATRYN        | AAAATGCTAATTAT      |
|        |            | 0.92177 |     |     |                       |                     |
| M00248 | V\$OCT1_07 | 2       | 908 | (+) | TNTATGNTAATT          | AAAATGCTAATT        |
|        |            | 0.83772 |     |     | NNNNNNNWATGCAAATNNNWN | AAATGCTAATTATAAAA-  |
| M00138 | V\$OCT1_04 | 5       | 909 | (+) | NW                    | TAAACA              |
|        |            | 0.87949 |     |     |                       |                     |
| M00137 | V\$OCT1_03 | 4       | 911 | (+) | NNNRTAATNANNN         | ATGCTAATTATAA       |
|        |            | 0.89332 |     |     |                       |                     |
| M00137 | V\$OCT1_03 | 3       | 912 | (-) | NNNRTAATNANNN         | TGCTAATTATAAA       |
|        |            | 0.77070 |     |     |                       |                     |
| M00136 | V\$OCT1_02 | 9       | 928 | (+) | NNGAATATKCANNNN       | AACAAAATGTAATAA     |
|        |            | 0.88671 |     |     |                       |                     |
| M00162 | V\$OCT1_06 | 9       | 930 | (+) | CWNAWTKWSATRYN        | CAAAATGTAATAAT      |
|        |            | 0.87070 |     |     |                       |                     |
| M00162 | V\$OCT1_06 | 3       | 931 | (-) | CWNAWTKWSATRYN        | AAAATGTAATAATA      |
|        |            | 0.86092 |     |     |                       |                     |
| M00137 | V\$OCT1_03 | 5       | 933 | (+) | NNNRTAATNANNN         | AATGTAATAATAC       |
|        |            | 0.86054 |     |     |                       |                     |
| M00162 | V\$OCT1_06 | 7       | 951 | (+) | CWNAWTKWSATRYN        | CTACATGTAATGAA      |
|        |            | 0.81550 |     |     |                       |                     |
| M00195 | V\$OCT1_Q6 | 2       | 951 | (+) | NNNNATGCAAATNAN       | CTACATGTAATGAAC     |
|        |            | 0.93984 |     |     |                       |                     |
| M00162 | V\$OCT1_06 | 4       | 952 | (-) | CWNAWTKWSATRYN        | TACATGTAATGAAC      |
|        |            | 0.88344 |     |     |                       |                     |
| M00137 | V\$OCT1_03 | 5       | 954 | (+) | NNNRTAATNANNN         | CATGTAATGAACT       |

|        |            |              |      |     |                             |                              |
|--------|------------|--------------|------|-----|-----------------------------|------------------------------|
| M00136 | V\$OCT1_02 | 0.77883<br>1 | 964  | (-) | NNGAATATKCANNNN             | ACTCTGAGTATTATA              |
| M00162 | V\$OCT1_06 | 0.80585<br>9 | 981  | (+) | CWNAWTKWSATRYN              | CTTTTTTGAAGTCT<br>TCTT-      |
| M00138 | V\$OCT1_04 | 0.88603<br>1 | 992  | (+) | NNNNNNNWATGCAAATNNNWN<br>NW | GACAATGAAAATTTATTT<br>A      |
| M00135 | V\$OCT1_01 | 0.75982<br>4 | 994  | (+) | NNNNWTATGCAAATNTNNN         | TTGACAATGAAAATTTAT<br>T      |
| M00137 | V\$OCT1_03 | 0.86843<br>1 | 994  | (+) | NNNRTAATNANNN               | TTGACAATGAAAA                |
| M00162 | V\$OCT1_06 | 0.82929<br>7 | 996  | (+) | CWNAWTKWSATRYN              | GACAATGAAAATTT               |
| M00136 | V\$OCT1_02 | 0.78857<br>6 | 997  | (-) | NNGAATATKCANNNN             | ACAATGAAAATTTAT              |
| M00162 | V\$OCT1_06 | 0.80429<br>7 | 997  | (-) | CWNAWTKWSATRYN              | ACAATGAAAATTTA               |
| M00248 | V\$OCT1_07 | 0.82425<br>3 | 997  | (+) | TNTATGNTAATT                | ACAATGAAAATT                 |
| M00136 | V\$OCT1_02 | 0.82728<br>7 | 1000 | (+) | NNGAATATKCANNNN             | ATGAAAATTTATTTA              |
| M00138 | V\$OCT1_04 | 0.78962<br>8 | 1002 | (+) | NNNNNNNWATGCAAATNNNWN<br>NW | GAAAATTTATTTA-<br>GACTTTTATA |
| M00195 | V\$OCT1_Q6 | 0.80349<br>3 | 1039 | (+) | NNNNATGCAAATNAN             | AGTAAACAAATTAC               |
| M00162 | V\$OCT1_06 | 0.85273<br>4 | 1041 | (-) | CWNAWTKWSATRYN              | TAAACAAATTACG                |
| M00137 | V\$OCT1_03 | 0.89845<br>9 | 1044 | (-) | NNNRTAATNANNN               | AACAAATTACGAA                |
| M00195 | V\$OCT1_Q6 | 0.79476<br>9 | 1046 | (+) | NNNNATGCAAATNAN             | CAAATTACGAATTAG              |
| M00138 | V\$OCT1_04 | 0.81304<br>9 | 1049 | (-) | NNNNNNNWATGCAAATNNNWN<br>NW | ATTACGAATTAG-<br>CATCCATGAGA |
| M00135 | V\$OCT1_01 | 0.80923<br>3 | 1051 | (-) | NNNNWTATGCAAATNTNNN         | TACGAATTAG-<br>CATCCATGA     |
| M00195 | V\$OCT1_Q6 | 0.85562<br>2 | 1053 | (-) | NNNNATGCAAATNAN             | CGAATTAGCATCCAT              |
| M00248 | V\$OCT1_07 | 0.90481<br>2 | 1055 | (-) | TNTATGNTAATT                | AATTAGCATCCA                 |
| M00138 | V\$OCT1_04 | 0.79192<br>8 | 1069 | (+) | NNNNNNNWATGCAAATNNNWN<br>NW | AGAAAAA-<br>TATAGAAAAAATTTCT |
| M00162 | V\$OCT1_06 | 0.84218<br>7 | 1083 | (-) | CWNAWTKWSATRYN              | AAAATTTCTTAATG               |
| M00162 | V\$OCT1_06 | 0.82109<br>4 | 1085 | (+) | CWNAWTKWSATRYN              | AATTTCTTAATGTA               |
| M00137 | V\$OCT1_03 | 0.84670<br>1 | 1088 | (+) | NNNRTAATNANNN               | TTCTTAATGTAGT                |
| M00162 | V\$OCT1_06 | 0.83984<br>4 | 1090 | (+) | CWNAWTKWSATRYN              | CTTAATGTAGTTG                |
| M00135 | V\$OCT1_01 | 0.74418<br>2 | 1094 | (-) | NNNNWTATGCAAATNTNNN         | ATGTAGTTT-<br>GCAAATCTGG     |
| M00135 | V\$OCT1_01 | 0.84299<br>9 | 1095 | (+) | NNNNWTATGCAAATNTNNN         | TGTAGTTT-<br>GCAAATCTGGG     |
| M00195 | V\$OCT1_Q6 | 0.84279<br>5 | 1096 | (-) | NNNNATGCAAATNAN             | GTAGTTTGCAAATCT              |
| M00195 | V\$OCT1_Q6 | 0.81086<br>2 | 1097 | (+) | NNNNATGCAAATNAN             | TAGTTTGCAAATCTG              |
| M00162 | V\$OCT1_06 | 0.86054<br>7 | 1098 | (-) | CWNAWTKWSATRYN              | AGTTTGCAAATCTG               |
| M00162 | V\$OCT1_06 | 0.80078<br>1 | 1105 | (+) | CWNAWTKWSATRYN              | AAATCTGGGATTGA<br>AA-        |
| M00138 | V\$OCT1_04 | 0.82120<br>5 | 1164 | (+) | NNNNNNNWATGCAAATNNNWN<br>NW | GAACCTATAAAAATGCAA<br>CAA    |
| M00137 | V\$OCT1_03 | 0.84116<br>9 | 1169 | (+) | NNNRTAATNANNN               | CTTATAAAAATGC                |

|        |            |                    |      |     |                             |                                      |
|--------|------------|--------------------|------|-----|-----------------------------|--------------------------------------|
| M00138 | V\$OCT1_04 | 0.82852<br>4       | 1170 | (+) | NNNNNNNWATGCAAATNNNWN<br>NW | TTATAAAATGCAACAAA<br>ACAAA           |
| M00136 | V\$OCT1_02 | 0.84596<br>6       | 1172 | (+) | NNGAATATKCANNNN             | ATAAAATGCAACAA                       |
| M00162 | V\$OCT1_06 | 0.89843<br>7       | 1191 | (+) | CWNAWTKWSATRYN              | AACCATTTAATACA                       |
| M00162 | V\$OCT1_06 | 0.82929<br>7       | 1192 | (-) | CWNAWTKWSATRYN              | ACCATTTAATACAT                       |
| M00162 | V\$OCT1_06 | 0.82890<br>6       | 1195 | (+) | CWNAWTKWSATRYN              | ATTTAATACATTTT                       |
| M00138 | V\$OCT1_04 | 0.78272<br>7       | 1214 | (+) | NNNNNNNWATGCAAATNNNWN<br>NW | AAAA-<br>TAGTATGTATTTTATTTA          |
| M00136 | V\$OCT1_02 | 0.78207<br>9       | 1216 | (+) | NNGAATATKCANNNN             | AATAGTATGTATTTT                      |
| M00162 | V\$OCT1_06 | 0.86796<br>9       | 1219 | (-) | CWNAWTKWSATRYN              | AGTATGTATTTTAT                       |
| M00162 | V\$OCT1_06 | 0.82148<br>4       | 1222 | (+) | CWNAWTKWSATRYN              | ATGTATTTTATTTT                       |
| M00162 | V\$OCT1_06 | 0.81210<br>9       | 1223 | (-) | CWNAWTKWSATRYN              | TGTATTTTATTTTA                       |
| M00248 | V\$OCT1_07 | 0.83654<br>9       | 1223 | (+) | TNTATGNTAATT                | TGTATTTTATTT                         |
| M00135 | V\$OCT1_01 | 0.73159<br>1       | 1230 | (+) | NNNNWTATGCAAATNTNNN         | TATTTTATGC-<br>TACAAGGAG             |
| M00162 | V\$OCT1_06 | 0.80585<br>9       | 1294 | (-) | CWNAWTKWSATRYN              | TAAATCACCGAGAG<br>AGAAAATAAGCATAGTG- |
| M00135 | V\$OCT1_01 | 0.79549<br>8       | 1330 | (-) | NNNNWTATGCAAATNTNNN         | TA                                   |
| M00136 | V\$OCT1_02 | 0.77098<br>0.77558 | 1331 | (+) | NNGAATATKCANNNN             | GAAAAATAAGCATAGT                     |
| M00136 | V\$OCT1_02 | 2                  | 1334 | (-) | NNGAATATKCANNNN             | AATAAGCATAGTGTA                      |
| M00248 | V\$OCT1_07 | 0.88276<br>4       | 1334 | (-) | TNTATGNTAATT                | AATAAGCATAGT                         |
| M00162 | V\$OCT1_06 | 0.84726<br>6       | 1350 | (-) | CWNAWTKWSATRYN              | GATCTCTAAAATTG                       |
| M00137 | V\$OCT1_03 | 0.87396<br>3       | 1381 | (-) | NNNRTAATNANNN               | ATAACATTAGGCA<br>GAA-                |
| M00135 | V\$OCT1_01 | 0.78519<br>6       | 1469 | (+) | NNNNWTATGCAAATNTNNN         | GAAATGCTAAAATGAA                     |
| M00162 | V\$OCT1_06 | 0.83476<br>6       | 1472 | (-) | CWNAWTKWSATRYN              | GAAATGCTAAAATG                       |
| M00162 | V\$OCT1_06 | 0.80078<br>1       | 1503 | (-) | CWNAWTKWSATRYN              | GAAATAAAAAGATAT                      |
| M00136 | V\$OCT1_02 | 0.81700<br>1       | 1524 | (+) | NNGAATATKCANNNN             | ACAAACATTCATGAA                      |
| M00162 | V\$OCT1_06 | 0.80429<br>7       | 1525 | (+) | CWNAWTKWSATRYN              | CAAACATTCATGAA                       |
| M00138 | V\$OCT1_04 | 0.81890<br>4       | 1526 | (+) | NNNNNNNWATGCAAATNNNWN<br>NW | AAACATTCATGAAAATCA<br>CTTAG          |
| M00135 | V\$OCT1_01 | 0.73578<br>8       | 1528 | (+) | NNNNWTATGCAAATNTNNN         | ACATTCATGAAAATCACT<br>T              |
| M00162 | V\$OCT1_06 | 0.80820<br>3       | 1530 | (+) | CWNAWTKWSATRYN              | ATTCATGAAAATCA                       |
| M00195 | V\$OCT1_Q6 | 0.88755<br>5       | 1530 | (+) | NNNNATGCAAATNAN             | ATTCATGAAAATCAC                      |
| M00162 | V\$OCT1_06 | 0.86054<br>7       | 1531 | (-) | CWNAWTKWSATRYN              | TTCATGAAAATCAC                       |
| M00162 | V\$OCT1_06 | 0.80820<br>3       | 1537 | (-) | CWNAWTKWSATRYN              | AAAATCACTTAGTT                       |
| M00138 | V\$OCT1_04 | 0.7867<br>0.81367  | 1554 | (+) | NNNNNNNWATGCAAATNNNWN<br>NW | TAGAGAAAAGA-<br>TAAAAATAAAGT         |
| M00162 | V\$OCT1_06 | 2                  | 1566 | (-) | CWNAWTKWSATRYN              | AAAAATAAAGTATT                       |
| M00162 | V\$OCT1_06 | 0.82382<br>8       | 1573 | (+) | CWNAWTKWSATRYN              | AAGTATTACCTTCT                       |



|        |            |              |      |     |                       |                     |
|--------|------------|--------------|------|-----|-----------------------|---------------------|
| M00162 | V\$OCT1_06 | 0.83437<br>5 | 1574 | (-) | CWNAWTKWSATRYN        | AGTATTACCTTCTT      |
| M00138 | V\$OCT1_04 | 0.78879<br>1 | 1579 | (-) | NNNNNNNWATGCAAATNNNWN | TACCTTCTTCTTCAT-    |
| M00138 | V\$OCT1_04 | 0.78356<br>3 | 1580 | (+) | NNNNNNNWATGCAAATNNNWN | ATACATTG            |
| M00195 | V\$OCT1_Q6 | 0.79394<br>1 | 1585 | (-) | NNNNATGCAAATNAN       | ACCTTCTTCTTCAT-     |
| M00162 | V\$OCT1_06 | 0.80078<br>1 | 1640 | (+) | CWNAWTKWSATRYN        | ATACATTGT           |
| M00135 | V\$OCT1_01 | 0.73616<br>9 | 1644 | (-) | NNNNWTATGCAAATNTNNN   | CTTCTTCATATACAT     |
| M00162 | V\$OCT1_06 | 0.91679<br>7 | 1646 | (+) | CWNAWTKWSATRYN        | AGAACTGAAACTTT      |
| M00162 | V\$OCT1_06 | 0.81601<br>6 | 1647 | (-) | CWNAWTKWSATRYN        | CTGAAACTTTAATATTTTG |
| M00136 | V\$OCT1_02 | 0.77774<br>8 | 1648 | (-) | NNGAATATKCANNNN       | GAAACTTTAATATT      |
| M00162 | V\$OCT1_06 | 0.87773<br>4 | 1680 | (-) | CWNAWTKWSATRYN        | AAACTTTAATATTT      |
| M00162 | V\$OCT1_06 | 0.81601<br>6 | 1683 | (+) | CWNAWTKWSATRYN        | AACTTTAATATTTTG     |
| M00138 | V\$OCT1_04 | 0.80175<br>7 | 1694 | (+) | NNNNNNNWATGCAAATNNNWN | AGAATCTAAGACAT      |
| M00138 | V\$OCT1_04 | 0.79548<br>3 | 1695 | (-) | NNNNNNNWATGCAAATNNNWN | ATCTAAGACATATC      |
| M00137 | V\$OCT1_03 | 0.85302<br>3 | 1696 | (+) | NNNRATATNANNN         | ATCTGGCAA-          |
| M00195 | V\$OCT1_Q6 | 0.79912<br>7 | 1698 | (+) | NNNNATGCAAATNAN       | TAAAAATTAATAAA      |
| M00138 | V\$OCT1_04 | 0.82789<br>6 | 1700 | (+) | NNNNNNNWATGCAAATNNNWN | TCTGGCAA-           |
| M00138 | V\$OCT1_04 | 0.78690<br>9 | 1704 | (+) | NNNNNNNWATGCAAATNNNWN | TAAAAATTAATAAAT     |
| M00162 | V\$OCT1_06 | 0.80820<br>3 | 1704 | (-) | CWNAWTKWSATRYN        | CTGGCAATAAAAA       |
| M00248 | V\$OCT1_07 | 0.79351<br>3 | 1707 | (-) | TNTATGNTAATT          | GGCAATAAAAAATTAA    |
| M00138 | V\$OCT1_04 | 0.80029<br>3 | 1708 | (+) | NNNNNNNWATGCAAATNNNWN | CAATAAAAAATTAATAAA- |
| M00137 | V\$OCT1_03 | 0.84788<br>6 | 1709 | (+) | NNNRATATNANNN         | TAAATA              |
| M00138 | V\$OCT1_04 | 0.81409<br>5 | 1709 | (-) | NNNNNNNWATGCAAATNNNWN | AAAAATTAATAAATAAA-  |
| M00162 | V\$OCT1_06 | 0.85507<br>8 | 1711 | (+) | CWNAWTKWSATRYN        | TATTTT              |
| M00136 | V\$OCT1_02 | 0.84028<br>2 | 1713 | (-) | NNGAATATKCANNNN       | AAAAATTAATAAAT      |
| M00138 | V\$OCT1_04 | 0.82266<br>8 | 1714 | (+) | NNNNNNNWATGCAAATNNNWN | AATAAATAAATATT      |
| M00136 | V\$OCT1_02 | 0.77260<br>4 | 1716 | (+) | NNGAATATKCANNNN       | TAAATAAATATTTTTT    |
| M00138 | V\$OCT1_04 | 0.83605<br>2 | 1716 | (-) | NNNNNNNWATGCAAATNNNWN | AAATAAATATTTTTTAA-  |
| M00162 | V\$OCT1_06 | 0.80585<br>9 | 1720 | (+) | CWNAWTKWSATRYN        | TAAGTAA             |
| M00137 | V\$OCT1_03 | 0.85894<br>9 | 1723 | (+) | NNNRATATNANNN         | ATAAATATTTTTAAT     |
| M00135 | V\$OCT1_01 | 0.74494<br>5 | 1725 | (+) | NNNNWTATGCAAATNTNNN   | ATAAATATTTTTTAA-    |
| M00195 | V\$OCT1_Q6 | 0.79093<br>9 | 1727 | (+) | NNNNATGCAAATNAN       | TAAGTAAAT           |
| M00162 | V\$OCT1_06 | 0.80820<br>3 | 1740 | (+) | CWNAWTKWSATRYN        | ATATTTTTAATAAG      |
| M00162 | V\$OCT1_06 | 0.80078<br>1 | 1741 | (+) | CWNAWTKWSATRYN        | TTTTTAATAAGTA       |

|        |            |                    |      |     |                             |                              |
|--------|------------|--------------------|------|-----|-----------------------------|------------------------------|
| M00138 | V\$OCT1_04 | 0.78189<br>0.78857 | 1742 | (-) | NNNNNNNWATGCAAATNNNWN<br>NW | TCACTTAATTTTCTG-<br>TAAGTAT  |
| M00136 | V\$OCT1_02 | 6<br>0.80429       | 1806 | (-) | NNGAATATKCANNNN             | ACTGTGAATAAGATG              |
| M00162 | V\$OCT1_06 | 7<br>0.79351       | 1828 | (+) | CWNAWKWSATRYN               | TGAAATAAGATATA               |
| M00248 | V\$OCT1_07 | 3<br>0.86289       | 1830 | (-) | TNTATGNTAATT                | AAATAAGATATA                 |
| M00162 | V\$OCT1_06 | 1<br>0.79130       | 1884 | (+) | CWNAWKWSATRYN               | TAACTTGAAATGTA               |
| M00138 | V\$OCT1_04 | 1<br>0.83710       | 1885 | (+) | NNNNNNNWATGCAAATNNNWN<br>NW | AACTTGAAATGTAAGAT-<br>TAATGA |
| M00162 | V\$OCT1_06 | 9<br>0.86171       | 1890 | (-) | CWNAWKWSATRYN               | GAAATGTAAGATTA               |
| M00137 | V\$OCT1_03 | 5<br>0.77585       | 1898 | (+) | NNNRTAATNANNN               | AGATTAATGAGTA                |
| M00136 | V\$OCT1_02 | 3                  | 1901 | (-) | NNGAATATKCANNNN             | TTAATGAGTAATAGT              |
| M00137 | V\$OCT1_03 | 0.8629<br>0.76039  | 1905 | (+) | NNNRTAATNANNN               | TGAGTAATAGTAA<br>GGCCGTATGA- |
| M00135 | V\$OCT1_01 | 7<br>0.86054       | 1929 | (+) | NNNNWTATGCAAATNTNNN         | TAAAATGTC                    |
| M00162 | V\$OCT1_06 | 7<br>0.81597       | 1932 | (-) | CWNAWKWSATRYN               | CGTATGATAAAATG               |
| M00138 | V\$OCT1_04 | 7<br>0.85926       | 1935 | (+) | NNNNNNNWATGCAAATNNNWN<br>NW | ATGATAAAATGTC-<br>TATTAATATT |
| M00138 | V\$OCT1_04 | 4<br>0.78803       | 1941 | (+) | NNNNNNNWATGCAAATNNNWN<br>NW | AAATGTCTATTAA-<br>TATTTTCTA  |
| M00136 | V\$OCT1_02 | 5<br>0.79101       | 1946 | (-) | NNGAATATKCANNNN             | TCTATTAATATTTTT              |
| M00136 | V\$OCT1_02 | 2<br>0.89843       | 1949 | (+) | NNGAATATKCANNNN             | ATTAATATTTTCTA               |
| M00162 | V\$OCT1_06 | 7<br>0.78690       | 2052 | (+) | CWNAWKWSATRYN               | GAGTCTTAGATATT               |
| M00138 | V\$OCT1_04 | 9<br>0.79454       | 2056 | (-) | NNNNNNNWATGCAAATNNNWN<br>NW | CTTAGATATTT-<br>GTATTATACACT |
| M00135 | V\$OCT1_01 | 4<br>0.80546       | 2058 | (-) | NNNNWTATGCAAATNTNNN         | TAGATATTTGTATTATACA          |
| M00162 | V\$OCT1_06 | 9<br>0.80585       | 2061 | (+) | CWNAWKWSATRYN               | ATATTTGTATTATA               |
| M00162 | V\$OCT1_06 | 9<br>0.80133       | 2077 | (+) | CWNAWKWSATRYN               | CTATCTTTGGTTTC               |
| M00138 | V\$OCT1_04 | 8<br>0.79004       | 2103 | (+) | NNNNNNNWATGCAAATNNNWN<br>NW | GTAATTCTACTTAAA-<br>TAAGAAAA |
| M00138 | V\$OCT1_04 | 6<br>0.80886       | 2104 | (-) | NNNNNNNWATGCAAATNNNWN<br>NW | TAATTCTACTTAAATAA-<br>GAAAT  |
| M00138 | V\$OCT1_04 | 7<br>0.75467       | 2111 | (+) | NNNNNNNWATGCAAATNNNWN<br>NW | ACTTAAATAAGAAAA-<br>TAGATTGA |
| M00135 | V\$OCT1_01 | 4<br>0.80664       | 2113 | (+) | NNNNWTATGCAAATNTNNN         | TTAAATAAGAAAA-<br>TAGATT     |
| M00162 | V\$OCT1_06 | 1<br>0.82382       | 2126 | (+) | CWNAWKWSATRYN               | TAGATTGACAAGTA               |
| M00162 | V\$OCT1_06 | 8<br>0.82929       | 2132 | (-) | CWNAWKWSATRYN               | GACAAGTAATACAC               |
| M00162 | V\$OCT1_06 | 7<br>0.79192       | 2194 | (+) | CWNAWKWSATRYN               | CATCCTTGCCTGCC               |
| M00138 | V\$OCT1_04 | 8<br>0.78168       | 2230 | (+) | NNNNNNNWATGCAAATNNNWN<br>NW | AGAGGTAAATACAGAAA<br>AAATGT  |
| M00138 | V\$OCT1_04 | 1<br>0.79025       | 2241 | (+) | NNNNNNNWATGCAAATNNNWN<br>NW | CAGAAAAAATGTTGAAA-<br>TAAATA |
| M00138 | V\$OCT1_04 | 5<br>0.79004       | 2243 | (+) | NNNNNNNWATGCAAATNNNWN<br>NW | GAAAAAATGTTGAAA-<br>TAAATAAG |
| M00138 | V\$OCT1_04 | 6<br>0.73616       | 2268 | (-) | NNNNNNNWATGCAAATNNNWN<br>NW | TAGTACTATCTGCC-<br>TATGTGTAG |
| M00135 | V\$OCT1_01 | 9                  | 2270 | (-) | NNNNWTATGCAAATNTNNN         | GTACTATCTGCCTATGTGT          |

|        |            |                |      |                   |                             |                              |
|--------|------------|----------------|------|-------------------|-----------------------------|------------------------------|
| M00162 | V\$OCT1_06 | 0.84765<br>6   | 2291 | (-)               | CWNAWTKWSATRYN              | AAAATCGCATTACC               |
| M00137 | V\$OCT1_03 | 0.87514<br>8   | 2294 | (-)               | NNNRTAATNANNN               | ATCGCATTACCAA                |
| M00138 | V\$OCT1_04 | 0.80823<br>9   | 2307 | (+)               | NNNNNNNWATGCAAATNNNWN<br>NW | CATTGTAAATGTATAAA-<br>TAATGC |
| M00195 | V\$OCT1_Q6 | 0.81659<br>4   | 2313 | (+)               | NNNNATGCAAATNAN             | AAATGTATAAATAAT              |
| M00138 | V\$OCT1_04 | 0.79841<br>1   | 2318 | (+)               | NNNNNNNWATGCAAATNNNWN<br>NW | TATAAA-<br>TAATGCACAATCTCAGA |
| M00136 | V\$OCT1_02 | 0.78316<br>2   | 2323 | (-)               | NNGAATATKCANNNN             | ATAATGCACAATCTC              |
| M00162 | V\$OCT1_06 | 0.80429<br>7   | 2329 | (+)               | CWNAWTKWSATRYN              | CACAATCTCAGATT               |
| M00162 | V\$OCT1_06 | 0.82148<br>4   | 2330 | (-)               | CWNAWTKWSATRYN              | ACAATCTCAGATTT               |
| M00162 | V\$OCT1_06 | 0.84765<br>6   | 2331 | (+)               | CWNAWTKWSATRYN              | CAATCTCAGATTTT               |
| M00138 | V\$OCT1_04 | 0.81304<br>9   | 2338 | (-)               | NNNNNNNWATGCAAATNNNWN<br>NW | AGATTTTTTTT-<br>GAATGCTAAGAA |
| M00162 | V\$OCT1_06 | 0.83437<br>5   | 2342 | (+)               | CWNAWTKWSATRYN              | TTTTTTGAATGCT                |
| M00138 | V\$OCT1_04 | 0.81472<br>2   | 2343 | (+)               | NNNNNNNWATGCAAATNNNWN<br>NW | TTTTTTGAATGCTAA-<br>GAAAGTCA |
| M00162 | V\$OCT1_06 | 0.84218<br>7   | 2356 | (+)               | CWNAWTKWSATRYN              | AAGAAAGTCATTTA               |
| M00162 | V\$OCT1_06 | 0.85507<br>8   | 2357 | (-)               | CWNAWTKWSATRYN              | AGAAAGTCATTTAC               |
| M00162 | V\$OCT1_06 | 0.83437<br>5   | 2362 | (+)               | CWNAWTKWSATRYN              | GTCATTTACGTTCA               |
| M00195 | V\$OCT1_Q6 | 0.83351<br>5   | 2362 | (-)               | NNNNATGCAAATNAN             | GTCATTTACGTTTAT              |
| M00059 | V\$YY1_01  | 0.79030<br>1   | 3    | (-)               | NNNNNCCATNTWNNNWN           | CCTTTAAATGCTCCCC             |
| M00059 | V\$YY1_01  | 0.85616<br>47  | (+)  | NNNNNCCATNTWNNNWN | AGAATTCATTTTCTAAT           |                              |
| M00059 | V\$YY1_01  | 0.78964<br>6   | 159  | (+)               | NNNNNCCATNTWNNNWN           | TCAGATCATTATCCATT            |
| M00059 | V\$YY1_01  | 0.78997<br>4   | 233  | (+)               | NNNNNCCATNTWNNNWN           | TAATTTTATTGTATCTG            |
| M00059 | V\$YY1_01  | 0.77686<br>8   | 249  | (+)               | NNNNNCCATNTWNNNWN           | GCTACTCATCTTTATTT            |
| M00059 | V\$YY1_01  | 0.79194<br>517 | (-)  | NNNNNCCATNTWNNNWN | TTTATACTATGGGAATT           |                              |
| M00059 | V\$YY1_01  | 0.79783<br>7   | 579  | (+)               | NNNNNCCATNTWNNNWN           | AGCTAGCATATTTAGTC            |
| M00059 | V\$YY1_01  | 0.78342<br>1   | 830  | (-)               | NNNNNCCATNTWNNNWN           | AATGAAAAATGTGATCT            |
| M00059 | V\$YY1_01  | 0.78014<br>4   | 879  | (-)               | NNNNNCCATNTWNNNWN           | GTAATGAAATGGCTTAA            |
| M00059 | V\$YY1_01  | 0.77686<br>8   | 897  | (+)               | NNNNNCCATNTWNNNWN           | AATTGGCATATAAAATG            |
| M00059 | V\$YY1_01  | 0.81356<br>5   | 903  | (-)               | NNNNNCCATNTWNNNWN           | CATATAAAATGCTAATT            |
| M00059 | V\$YY1_01  | 0.82634<br>3   | 947  | (-)               | NNNNNCCATNTWNNNWN           | CTCCCTACATGTAATGA            |
| M00059 | V\$YY1_01  | 0.78702<br>5   | 948  | (+)               | NNNNNCCATNTWNNNWN           | TCCCTACATGTAATGAA            |
| M00059 | V\$YY1_01  | 0.80275<br>2   | 1021 | (+)               | NNNNNCCATNTWNNNWN           | TATAGACATCTTGATA             |
| M00059 | V\$YY1_01  | 0.77588<br>5   | 1086 | (-)               | NNNNNCCATNTWNNNWN           | ATTCTTAATGTAGTTT             |
| M00059 | V\$YY1_01  | 0.81585<br>8   | 1101 | (-)               | NNNNNCCATNTWNNNWN           | TTGCAAATCTGGGATTG            |
| M00059 | V\$YY1_01  | 0.82175<br>6   | 1127 | (-)               | NNNNNCCATNTWNNNWN           | GTCAAGAGATGTTGATG            |

|                |            |                    |      |     |                     |                                 |
|----------------|------------|--------------------|------|-----|---------------------|---------------------------------|
| M00059         | V\$YY1_01  | 0.81880<br>7       | 1145 | (+) | NNNNNCCATNTWNNNWN   | CAAGAACATTTTTTTTT               |
| M00059         | V\$YY1_01  | 0.82470<br>5       | 1188 | (+) | NNNNNCCATNTWNNNWN   | ACAAACCATTTAATACA               |
| M00059         | V\$YY1_01  | 0.77686<br>8       | 1340 | (-) | NNNNNCCATNTWNNNWN   | CATAGTGTATGATCTCT               |
| M00059         | V\$YY1_01  | 0.80308<br>0.78931 | 1439 | (-) | NNNNNCCATNTWNNNWN   | AAGAAAACATGTGGATC               |
| M00059         | V\$YY1_01  | 8                  | 1449 | (-) | NNNNNCCATNTWNNNWN   | GTGGATCAATGGAACAA               |
| M00059         | V\$YY1_01  | 0.78637<br>0.77916 | 1475 | (-) | NNNNNCCATNTWNNNWN   | ATGCTAAAATGAAACAG               |
| M00059         | V\$YY1_01  | 1                  | 1523 | (+) | NNNNNCCATNTWNNNWN   | GACAAACATTCATGAAA               |
| M00059         | V\$YY1_01  | 0.77326<br>0.79718 | 1585 | (+) | NNNNNCCATNTWNNNWN   | CTTCTTCATATACATTG               |
| M00059         | V\$YY1_01  | 2                  | 1591 | (+) | NNNNNCCATNTWNNNWN   | CATATACATTGTTTGAT               |
| M00059         | V\$YY1_01  | 0.77129<br>8       | 1688 | (-) | NNNNNCCATNTWNNNWN   | AGACATATCTGGCAATA<br>AAACATCTG- |
| M00069         | V\$YY1_02  | 0.77436<br>6       | 1855 | (-) | NNNCGGCCATCTGNCTSNW | GATGGCTGGCA                     |
| M00059         | V\$YY1_01  | 0.80013<br>1       | 1935 | (-) | NNNNNCCATNTWNNNWN   | ATGATAAAATGTCTATT               |
| M00069         | V\$YY1_02  | 0.77204<br>6       | 1981 | (+) | NNNCGGCCATCTGNCTSNW | TTTTTGCCATGAGGTTT-<br>GCA       |
| M00059         | V\$YY1_01  | 0.83322<br>4       | 2023 | (-) | NNNNNCCATNTWNNNWN   | GATCAAACCTGGGCTCC               |
| M00059         | V\$YY1_01  | 0.77686<br>8       | 2148 | (+) | NNNNNCCATNTWNNNWN   | TTTCCTCATCTTCCCAT               |
| M00059         | V\$YY1_01  | 0.80570<br>1       | 2241 | (-) | NNNNNCCATNTWNNNWN   | CAGAAAAAATGTTGAAA               |
| M00059         | V\$YY1_01  | 0.77522<br>9       | 2301 | (+) | NNNNNCCATNTWNNNWN   | TACCAACATTGTAAATG               |
| M00059         | V\$YY1_01  | 0.83519<br>0.77195 | 2358 | (+) | NNNNNCCATNTWNNNWN   | GAAAGTCATTTACGTTC               |
| M00059         | V\$YY1_01  | 3                  | 2368 | (+) | NNNNNCCATNTWNNNWN   | TACGTTCATCCACTATC               |
| CSN3 Bos Tarus |            |                    |      |     |                     |                                 |
| M0025          |            |                    |      |     |                     |                                 |
| 2              | V\$TATA_01 | 0.78508            | 7    | (+) | STATAAAWRNNNNNN     | AGATAAATCTCATGA                 |
| M0021          |            | 0.84895            |      |     |                     |                                 |
| 6              | V\$TATA_C  | 7                  | 142  | (+) | NCTATAAAAR          | ACATTAAAAAC                     |
| M0025          |            | 0.77467            |      |     |                     |                                 |
| 2              | V\$TATA_01 | 6                  | 142  | (+) | STATAAAWRNNNNNN     | ACATTAAAAACATTCA                |
| M0021          |            | 0.76472            |      |     |                     |                                 |
| 6              | V\$TATA_C  | 1                  | 150  | (+) | NCTATAAAAR          | ACATTCAAAG                      |
| M0021          |            | 0.77422            |      |     |                     |                                 |
| 6              | V\$TATA_C  | 8                  | 209  | (+) | NCTATAAAAR          | ATTTTAGAAG                      |
| M0021          |            | 0.79297            |      |     |                     |                                 |
| 6              | V\$TATA_C  | 6                  | 306  | (+) | NCTATAAAAR          | TCTGTATAAT                      |
| M0021          |            |                    |      |     |                     |                                 |
| 6              | V\$TATA_C  | 0.77766            | 319  | (+) | NCTATAAAAR          | ATGATAAAAT                      |
| M0021          |            | 0.86268            |      |     |                     |                                 |
| 6              | V\$TATA_C  | 8                  | 398  | (+) | NCTATAAAAR          | TTCTTAAAAA                      |
| M0021          |            | 0.84103            |      |     |                     |                                 |
| 6              | V\$TATA_C  | 5                  | 399  | (+) | NCTATAAAAR          | TCTTAAAAAA                      |
| M0021          |            |                    |      |     |                     |                                 |
| 6              | V\$TATA_C  | 0.79324            | 400  | (+) | NCTATAAAAR          | CTTAAAAAAA                      |
| M0025          |            | 0.77975            |      |     |                     |                                 |
| 2              | V\$TATA_01 | 1                  | 447  | (+) | STATAAAWRNNNNNN     | AGACAAATGTGGAGG                 |
| M0025          |            | 0.77315            |      |     |                     |                                 |
| 2              | V\$TATA_01 | 4                  | 467  | (+) | STATAAAWRNNNNNN     | CTTTTtagGAAGATG                 |
| M0021          |            | 0.74359            |      |     |                     |                                 |
| 6              | V\$TATA_C  | 7                  | 517  | (+) | NCTATAAAAR          | ATTTCAAAAT                      |
| M0021          |            |                    |      |     |                     |                                 |
| 6              | V\$TATA_C  | 0.80037            | 564  | (+) | NCTATAAAAR          | AGTATACAAC                      |

|       |            |         |      |     |                 |                 |
|-------|------------|---------|------|-----|-----------------|-----------------|
| M0021 |            | 0.95590 |      |     |                 |                 |
| 6     | V\$TATA_C  | 2       | 572  | (+) | NCTATAAAAR      | ACTTTAAAAA      |
| M0021 |            | 0.76762 |      |     |                 |                 |
| 6     | V\$TATA_C  | 6       | 573  | (+) | NCTATAAAAR      | CTTTAAAAAA      |
| M0025 |            | 0.84039 |      |     |                 |                 |
| 2     | V\$TATA_01 | 6       | 573  | (+) | STATAAAWRNNNNNN | CTTTAAAAATAACA  |
| M0021 |            |         |      |     |                 |                 |
| 6     | V\$TATA_C  | 0.77634 | 574  | (+) | NCTATAAAAR      | TTTAAAAAAT      |
| M0021 |            |         |      |     |                 |                 |
| 6     | V\$TATA_C  | 0.77766 | 602  | (+) | NCTATAAAAR      | TTCATGAAAG      |
| M0021 |            | 0.79033 |      |     |                 |                 |
| 6     | V\$TATA_C  | 5       | 727  | (+) | NCTATAAAAR      | TGCTAAAAAG      |
| M0021 |            | 0.77422 |      |     |                 |                 |
| 6     | V\$TATA_C  | 8       | 752  | (+) | NCTATAAAAR      | ATTTTACAAG      |
| M0021 |            | 0.90863 |      |     |                 |                 |
| 6     | V\$TATA_C  | 5       | 801  | (+) | NCTATAAAAR      | ATTATAAAAA      |
| M0025 |            | 0.83912 |      |     |                 |                 |
| 2     | V\$TATA_01 | 7       | 802  | (+) | STATAAAWRNNNNNN | TTATAAAAAATTCCA |
| M0025 |            | 0.78203 |      |     |                 |                 |
| 2     | V\$TATA_01 | 5       | 804  | (+) | STATAAAWRNNNNNN | ATAAAAAATTCCATG |
| M0021 |            | 0.83390 |      |     |                 |                 |
| 6     | V\$TATA_C  | 5       | 823  | (+) | NCTATAAAAR      | ACCATAGAAA      |
| M0021 |            | 0.86691 |      |     |                 |                 |
| 6     | V\$TATA_C  | 3       | 849  | (+) | NCTATAAAAR      | ATCTTAAAAAG     |
| M0021 |            | 0.77185 |      |     |                 |                 |
| 6     | V\$TATA_C  | 1       | 920  | (+) | NCTATAAAAR      | AGCTTAATAA      |
| M0021 |            | 0.77607 |      |     |                 |                 |
| 6     | V\$TATA_C  | 6       | 921  | (+) | NCTATAAAAR      | GCTTAATAAG      |
| M0021 |            | 0.83205 |      |     |                 |                 |
| 6     | V\$TATA_C  | 7       | 953  | (+) | NCTATAAAAR      | ACCACAAAAA      |
| M0025 |            | 0.77924 |      |     |                 |                 |
| 2     | V\$TATA_01 | 4       | 954  | (+) | STATAAAWRNNNNNN | CCACAAAAAAGAAAT |
| M0021 |            | 0.77053 |      |     |                 |                 |
| 6     | V\$TATA_C  | 1       | 1002 | (+) | NCTATAAAAR      | TCAATACAAT      |
| M0021 |            |         |      |     |                 |                 |
| 6     | V\$TATA_C  | 0.7568  | 1013 | (+) | NCTATAAAAR      | GCAATCAAAT      |
| M0021 |            | 0.75336 |      |     |                 |                 |
| 6     | V\$TATA_C  | 7       | 1037 | (+) | NCTATAAAAR      | ACATTAAATA      |
| M0025 |            | 0.79548 |      |     |                 |                 |
| 2     | V\$TATA_01 | 3       | 1038 | (+) | STATAAAWRNNNNNN | CATTAAATAAACATG |
| M0025 |            | 0.79802 |      |     |                 |                 |
| 2     | V\$TATA_01 | 1       | 1078 | (+) | STATAAAWRNNNNNN | TTATATATTAAATCT |
| M0025 |            | 0.77213 |      |     |                 |                 |
| 2     | V\$TATA_01 | 9       | 1082 | (+) | STATAAAWRNNNNNN | ATATTAAATCTATTT |
| M0021 |            | 0.76868 |      |     |                 |                 |
| 6     | V\$TATA_C  | 2       | 1152 | (+) | NCTATAAAAR      | TCAATGAAAT      |
| M0021 |            | 0.77660 |      |     |                 |                 |
| 6     | V\$TATA_C  | 4       | 1323 | (+) | NCTATAAAAR      | TCTTTATCAA      |
| M0025 |            | 0.77112 |      |     |                 |                 |
| 2     | V\$TATA_01 | 4       | 1324 | (+) | STATAAAWRNNNNNN | CTTTATCAAGCCTGA |
| M0021 |            | 0.76868 |      |     |                 |                 |
| 6     | V\$TATA_C  | 2       | 1359 | (+) | NCTATAAAAR      | AGTCTATAAA      |
| M0025 |            | 0.77569 |      |     |                 |                 |
| 2     | V\$TATA_01 | 1       | 1360 | (+) | STATAAAWRNNNNNN | GTCTATAAAACTCAG |
| M0021 |            | 0.96223 |      |     |                 |                 |
| 6     | V\$TATA_C  | 9       | 1361 | (+) | NCTATAAAAR      | TCTATAAAAC      |
| M0025 |            |         |      |     |                 |                 |
| 2     | V\$TATA_01 | 0.88607 | 1362 | (+) | STATAAAWRNNNNNN | CTATAAAACTCAGTT |
| M0021 |            | 0.87985 |      |     |                 |                 |
| 6     | V\$TATA_C  | 2       | 1390 | (+) | NCTATAAAAR      | TCTATACAAG      |
| M0025 |            |         |      |     |                 |                 |
| 2     | V\$TATA_01 | 0.7932  | 1391 | (+) | STATAAAWRNNNNNN | CTATACAAGCATGAT |
| M0021 |            | 0.85476 |      |     |                 |                 |
| 6     | V\$TATA_C  | 6       | 1413 | (+) | NCTATAAAAR      | GCTATAACAA      |
| M0025 |            | 0.81197 |      |     |                 |                 |
| 2     | V\$TATA_01 | 7       | 1414 | (+) | STATAAAWRNNNNNN | CTATAACAAGATGTA |

|       |            |         |      |     |                 |                 |
|-------|------------|---------|------|-----|-----------------|-----------------|
| M0021 |            | 0.74306 |      |     |                 |                 |
| 6     | V\$TATA_C  | 8       | 1428 | (+) | NCTATAAAAR      | AGTATTTAAT      |
| M0021 |            | 0.77660 |      |     |                 |                 |
| 6     | V\$TATA_C  | 4       | 1435 | (+) | NCTATAAAAR      | AATTTATAAA      |
| M0025 |            | 0.85587 |      |     |                 |                 |
| 2     | V\$TATA_01 | 4       | 1436 | (+) | STATAAAWRNNNNNN | ATTTATAAATGCAAG |
| M0021 |            | 0.80512 |      |     |                 |                 |
| 6     | V\$TATA_C  | 3       | 1437 | (+) | NCTATAAAAR      | TTTATAAATG      |
| M0025 |            | 0.87439 |      |     |                 |                 |
| 2     | V\$TATA_01 | 7       | 1438 | (+) | STATAAAWRNNNNNN | TTATAAATGCAAGAT |
| M0021 |            | 0.88302 |      |     |                 |                 |
| 6     | V\$TATA_C  | 1       | 1461 | (+) | NCTATAAAAR      | ATTTTAAAAA      |
| M0021 |            | 0.75072 |      |     |                 |                 |
| 6     | V\$TATA_C  | 6       | 1462 | (+) | NCTATAAAAR      | TTTTAAAAAT      |
| M0025 |            | 0.81933 |      |     |                 |                 |
| 2     | V\$TATA_01 | 5       | 1462 | (+) | STATAAAWRNNNNNN | TTTTAAAAATCTAAA |
| M0021 |            | 0.77660 |      |     |                 |                 |
| 6     | V\$TATA_C  | 4       | 1488 | (+) | NCTATAAAAR      | TCTTTCTAAA      |
| M0021 |            | 0.80195 |      |     |                 |                 |
| 6     | V\$TATA_C  | 4       | 1490 | (+) | NCTATAAAAR      | TTTCTAAAAA      |
| M0021 |            | 0.75204 |      |     |                 |                 |
| 6     | V\$TATA_C  | 6       | 1491 | (+) | NCTATAAAAR      | TTCTAAAAAG      |
| M0025 |            | 0.77543 |      |     |                 |                 |
| 2     | V\$TATA_01 | 8       | 1491 | (+) | STATAAAWRNNNNNN | TTCTAAAAAGACAAT |
| M0021 |            | 0.74465 |      |     |                 |                 |
| 6     | V\$TATA_C  | 3       | 1492 | (+) | NCTATAAAAR      | TCTAAAAAGA      |
| M0021 |            | 0.75019 |      |     |                 |                 |
| 6     | V\$TATA_C  | 8       | 1510 | (+) | NCTATAAAAR      | CTTTTCAAAT      |
| M0025 |            | 0.83481 |      |     |                 |                 |
| 2     | V\$TATA_01 | 3       | 1521 | (+) | STATAAAWRNNNNNN | AAATAAATAGGTATT |
| M0021 |            | 0.84288 |      |     |                 |                 |
| 6     | V\$TATA_C  | 4       | 1553 | (+) | NCTATAAAAR      | TCTTTAGAAA      |
| M0021 |            | 0.81278 |      |     |                 |                 |
| 6     | V\$TATA_C  | 1       | 1595 | (+) | NCTATAAAAR      | TCCAGAAAAC      |
| M0021 |            | 0.74887 |      |     |                 |                 |
| 6     | V\$TATA_C  | 8       | 1629 | (+) | NCTATAAAAR      | TTCATTAAAT      |
| M0021 |            | 0.74306 |      |     |                 |                 |
| 6     | V\$TATA_C  | 8       | 1630 | (+) | NCTATAAAAR      | TCATTAAATT      |
| M0021 |            | 0.81779 |      |     |                 |                 |
| 6     | V\$TATA_C  | 8       | 1650 | (+) | NCTATAAAAR      | ATTATATAAC      |
| M0025 |            | 0.79852 |      |     |                 |                 |
| 2     | V\$TATA_01 | 8       | 1651 | (+) | STATAAAWRNNNNNN | TTATATAACTTATGA |
| M0021 |            | 0.78663 |      |     |                 |                 |
| 6     | V\$TATA_C  | 9       | 1681 | (+) | NCTATAAAAR      | ATTATGAAAA      |
| M0025 |            | 0.83709 |      |     |                 |                 |
| 2     | V\$TATA_01 | 7       | 1784 | (+) | STATAAAWRNNNNNN | TTATTTATAGGCAAA |
| M0025 |            | 0.80334 |      |     |                 |                 |
| 2     | V\$TATA_01 | 9       | 1786 | (+) | STATAAAWRNNNNNN | ATTTATAGGCAAAAA |
| M0021 |            | 0.76287 |      |     |                 |                 |
| 6     | V\$TATA_C  | 3       | 1811 | (+) | NCTATAAAAR      | GCCAGATAAA      |
| M0025 |            | 0.77340 |      |     |                 |                 |
| 2     | V\$TATA_01 | 8       | 1812 | (+) | STATAAAWRNNNNNN | CCAGATAAAGGGAAA |
| M0025 |            | 0.81121 |      |     |                 |                 |
| 2     | V\$TATA_01 | 5       | 1814 | (+) | STATAAAWRNNNNNN | AGATAAAGGGAAATA |
| M0021 |            | 0.77290 |      |     |                 |                 |
| 6     | V\$TATA_C  | 7       | 1934 | (+) | NCTATAAAAR      | GCTATCTAAT      |
| M0025 |            | 0.78660 |      |     |                 |                 |
| 2     | V\$TATA_01 | 2       | 1955 | (+) | STATAAAWRNNNNNN | GCATTTAATGCCTCA |
| M0021 |            |         |      |     |                 |                 |
| 6     | V\$TATA_C  | 0.74254 | 2018 | (+) | NCTATAAAAR      | CCATTCAAAT      |
| M0025 |            | 0.80208 |      |     |                 |                 |
| 2     | V\$TATA_01 | 1       | 2020 | (+) | STATAAAWRNNNNNN | ATTCAAATGCCCATG |
| M0025 |            | 0.81502 |      |     |                 |                 |
| 2     | V\$TATA_01 | 2       | 2074 | (+) | STATAAAWRNNNNNN | CTATTAATCTCTGCA |
| M0021 |            | 0.74597 |      |     |                 |                 |
| 6     | V\$TATA_C  | 3       | 2116 | (+) | NCTATAAAAR      | CCTACAGAAA      |

|       |            |         |      |     |                 |                 |
|-------|------------|---------|------|-----|-----------------|-----------------|
| M0021 |            | 0.75706 |      |     |                 |                 |
| 6     | V\$TATA_C  | 4       | 2228 | (+) | NCTATAAAAR      | TTCCTAAAT       |
| M0021 |            | 0.80644 |      |     |                 |                 |
| 6     | V\$TATA_C  | 3       | 2258 | (+) | NCTATAAAAR      | ACCTTAATAA      |
| M0021 |            | 0.78743 |      |     |                 |                 |
| 6     | V\$TATA_C  | 1       | 2259 | (+) | NCTATAAAAR      | CCTTAATAAG      |
| M0025 |            | 0.80842 |      |     |                 |                 |
| 2     | V\$TATA_01 | 4       | 2311 | (+) | STATAAAWRNNNNNN | GTACATATGAAACGA |
| M0025 |            |         |      |     |                 |                 |
| 2     | V\$TATA_01 | 0.78305 | 2313 | (+) | STATAAAWRNNNNNN | ACATATGAAACGAAT |
| M0021 |            | 0.76762 |      |     |                 |                 |
| 6     | V\$TATA_C  | 6       | 2412 | (+) | NCTATAAAAR      | CTTTTAATAA      |
| M0021 |            | 0.81779 |      |     |                 |                 |
| 6     | V\$TATA_C  | 8       | 2415 | (+) | NCTATAAAAR      | TTAATAAAAT      |
| M0025 |            | 0.79573 |      |     |                 |                 |
| 2     | V\$TATA_01 | 7       | 2441 | (+) | STATAAAWRNNNNNN | CTATATCTCCCCCTC |
| M0021 |            | 0.78663 |      |     |                 |                 |
| 6     | V\$TATA_C  | 9       | 2472 | (+) | NCTATAAAAR      | CCCTTAAATC      |
| M0021 |            | 0.76630 |      |     |                 |                 |
| 6     | V\$TATA_C  | 6       | 2481 | (+) | NCTATAAAAR      | CAAATAAAAC      |
| M0021 |            | 0.81462 |      |     |                 |                 |
| 6     | V\$TATA_C  | 9       | 2648 | (+) | NCTATAAAAR      | TGTATCAAAT      |
| M0021 |            | 0.75072 |      |     |                 |                 |
| 6     | V\$TATA_C  | 6       | 2657 | (+) | NCTATAAAAR      | TTTTTTAAAT      |
| M0021 |            | 0.75072 |      |     |                 |                 |
| 6     | V\$TATA_C  | 6       | 2658 | (+) | NCTATAAAAR      | TTTTTAAATT      |
| M0025 |            | 0.77746 |      |     |                 |                 |
| 2     | V\$TATA_01 | 8       | 2711 | (+) | STATAAAWRNNNNNN | TTTTATAGAACAAAA |
| M0021 |            |         |      |     |                 |                 |
| 6     | V\$TATA_C  | 0.76921 | 2712 | (+) | NCTATAAAAR      | TTTATAGAAC      |
| M0021 |            |         |      |     |                 |                 |
| 6     | V\$TATA_C  | 0.80169 | 2728 | (+) | NCTATAAAAR      | GCTACATAAG      |
| M0025 |            | 0.78254 |      |     |                 |                 |
| 2     | V\$TATA_01 | 3       | 2729 | (+) | STATAAAWRNNNNNN | CTACATAAGTAATTT |
| M0021 |            | 0.80459 |      |     |                 |                 |
| 6     | V\$TATA_C  | 5       | 2762 | (+) | NCTATAAAAR      | CTTATTAAAG      |
| M0025 |            | 0.79802 |      |     |                 |                 |
| 2     | V\$TATA_01 | 1       | 2763 | (+) | STATAAAWRNNNNNN | TTATTAAAGTCATAT |
| M0025 |            | 0.78203 |      |     |                 |                 |
| 2     | V\$TATA_01 | 5       | 2805 | (+) | STATAAAWRNNNNNN | GAATAAAGAAATCAC |
| M0021 |            | 0.75204 |      |     |                 |                 |
| 6     | V\$TATA_C  | 6       | 2820 | (+) | NCTATAAAAR      | ACTTTATCAT      |
| M0021 |            | 0.74650 |      |     |                 |                 |
| 6     | V\$TATA_C  | 1       | 2829 | (+) | NCTATAAAAR      | TCTAGAGAAA      |
| M0021 |            | 0.80644 |      |     |                 |                 |
| 6     | V\$TATA_C  | 3       | 2839 | (+) | NCTATAAAAR      | ACCTTTAAAA      |
| M0021 |            | 0.94507 |      |     |                 |                 |
| 6     | V\$TATA_C  | 5       | 2840 | (+) | NCTATAAAAR      | CCTTTAAAT       |
| M0025 |            | 0.79091 |      |     |                 |                 |
| 2     | V\$TATA_01 | 6       | 2841 | (+) | STATAAAWRNNNNNN | CTTTAAATTCCTAT  |
| M0021 |            | 0.79614 |      |     |                 |                 |
| 6     | V\$TATA_C  | 5       | 2887 | (+) | NCTATAAAAR      | TCCTGAAAAT      |
| M0021 |            | 0.74359 |      |     |                 |                 |
| 6     | V\$TATA_C  | 7       | 2897 | (+) | NCTATAAAAR      | ATTTTTAAAT      |
| M0021 |            | 0.75072 |      |     |                 |                 |
| 6     | V\$TATA_C  | 6       | 2898 | (+) | NCTATAAAAR      | TTTTTAAATT      |
| M0021 |            |         |      |     |                 |                 |
| 6     | V\$TATA_C  | 0.76921 | 2905 | (+) | NCTATAAAAR      | ATTATAATAT      |
| M0025 |            |         |      |     |                 |                 |
| 2     | V\$TATA_01 | 0.7729  | 2906 | (+) | STATAAAWRNNNNNN | TTATAATATGCACTT |
| M0021 |            | 0.80274 |      |     |                 |                 |
| 6     | V\$TATA_C  | 6       | 2916 | (+) | NCTATAAAAR      | CACTTAAAT       |
| M0021 |            | 0.76630 |      |     |                 |                 |
| 6     | V\$TATA_C  | 6       | 2928 | (+) | NCTATAAAAR      | TTCACAAAAA      |
| M0025 |            | 0.79345 |      |     |                 |                 |
| 2     | V\$TATA_01 | 3       | 2936 | (+) | STATAAAWRNNNNNN | AAATAAATATATAAA |

|       |             |         |      |     |                 |                 |
|-------|-------------|---------|------|-----|-----------------|-----------------|
| M0025 |             | 0.78584 |      |     |                 |                 |
| 2     | V\$TATA_01  | 1       | 2940 | (+) | STATAAAWRNNNNNN | AAATATATAAACCAT |
| M0021 |             | 0.80221 |      |     |                 |                 |
| 6     | V\$TATA_C   | 8       | 2941 | (+) | NCTATAAAAR      | AATATATAAA      |
| M0025 |             | 0.89951 |      |     |                 |                 |
| 2     | V\$TATA_01  | 8       | 2942 | (+) | STATAAAWRNNNNNN | ATATATAAACCATAG |
| M0021 |             | 0.91814 |      |     |                 |                 |
| 6     | V\$TATA_C   | 1       | 3025 | (+) | NCTATAAAAR      | TCCTTAAAT       |
| M0021 |             | 0.75019 |      |     |                 |                 |
| 6     | V\$TATA_C   | 8       | 3086 | (+) | NCTATAAAAR      | CTTTAATAT       |
| M0025 |             | 0.82466 |      |     |                 |                 |
| 2     | V\$TATA_01  | 4       | 3092 | (+) | STATAAAWRNNNNNN | ATATTTAAGTGTATT |
| M0012 |             | 0.77062 |      |     |                 |                 |
| 6     | V\$GATA1_02 | 5       | 3    | (+) | NNNNNGATANKGNN  | AGGAAGATAAATCT  |
| M0012 |             | 0.89049 |      |     |                 |                 |
| 7     | V\$GATA1_03 | 5       | 3    | (+) | RNSNNGATAANNGN  | AGGAAGATAAATCT  |
| M0012 |             | 0.90808 |      |     |                 |                 |
| 8     | V\$GATA1_04 | 8       | 4    | (+) | NNCWGATARNNNN   | GGAAGATAAATCT   |
| M0007 |             | 0.81786 |      |     |                 |                 |
| 5     | V\$GATA1_01 | 8       | 5    | (+) | SNNGATNNNN      | GAAGATAAAT      |
| M0007 |             | 0.85385 |      |     |                 |                 |
| 6     | V\$GATA2_01 | 7       | 5    | (+) | NNNGATRNNN      | GAAGATAAAT      |
| M0007 |             | 0.84669 |      |     |                 |                 |
| 7     | V\$GATA3_01 | 9       | 6    | (+) | NNGATARNG       | AAGATAAAT       |
| M0020 |             | 0.94066 |      |     |                 |                 |
| 3     | V\$GATA_C   | 5       | 7    | (+) | NGATAAGNMNN     | AGATAAATCTC     |
| M0007 |             | 0.78479 |      |     |                 |                 |
| 5     | V\$GATA1_01 | 8       | 9    | (-) | SNNGATNNNN      | ATAAATCTCA      |
| M0007 |             | 0.79792 |      |     |                 |                 |
| 6     | V\$GATA2_01 | 5       | 9    | (-) | NNNGATRNNN      | ATAAATCTCA      |
| M0012 |             | 0.79446 |      |     |                 |                 |
| 7     | V\$GATA1_03 | 3       | 27   | (-) | RNSNNGATAANNGN  | GACACTAACACCCT  |
| M0007 |             | 0.83563 |      |     |                 |                 |
| 5     | V\$GATA1_01 | 7       | 29   | (-) | SNNGATNNNN      | CACTAACACC      |
| M0007 |             |         |      |     |                 |                 |
| 6     | V\$GATA2_01 | 0.79567 | 29   | (-) | NNNGATRNNN      | CACTAACACC      |
| M0012 |             | 0.85031 |      |     |                 |                 |
| 7     | V\$GATA1_03 | 8       | 52   | (-) | RNSNNGATAANNGN  | CTGGTTATTTACCT  |
| M0007 |             | 0.77640 |      |     |                 |                 |
| 5     | V\$GATA1_01 | 7       | 116  | (+) | SNNGATNNNN      | GCTGACGGTC      |
| M0012 |             | 0.81014 |      |     |                 |                 |
| 7     | V\$GATA1_03 | 2       | 130  | (+) | RNSNNGATAANNGN  | GGAAAGGTAATCAC  |
| M0007 |             | 0.81194 |      |     |                 |                 |
| 5     | V\$GATA1_01 | 5       | 135  | (-) | SNNGATNNNN      | GGTAATCACA      |
| M0007 |             | 0.82724 |      |     |                 |                 |
| 6     | V\$GATA2_01 | 4       | 135  | (-) | NNNGATRNNN      | GGTAATCACA      |
| M0012 |             | 0.81161 |      |     |                 |                 |
| 7     | V\$GATA1_03 | 2       | 219  | (-) | RNSNNGATAANNGN  | AACATTTTCTTCCT  |
| M0007 |             | 0.79170 |      |     |                 |                 |
| 5     | V\$GATA1_01 | 8       | 255  | (-) | SNNGATNNNN      | GAATATCCTT      |
| M0007 |             | 0.87280 |      |     |                 |                 |
| 6     | V\$GATA2_01 | 1       | 255  | (-) | NNNGATRNNN      | GAATATCCTT      |
| M0020 |             | 0.83038 |      |     |                 |                 |
| 3     | V\$GATA_C   | 2       | 259  | (-) | NGATAAGNMNN     | ATCCTTTGTCA     |
| M0012 |             | 0.79568 |      |     |                 |                 |
| 7     | V\$GATA1_03 | 8       | 260  | (-) | RNSNNGATAANNGN  | TCCTTTGTCATGAT  |
| M0012 |             | 0.78368 |      |     |                 |                 |
| 7     | V\$GATA1_03 | 4       | 266  | (+) | RNSNNGATAANNGN  | GTCATGATTATGAT  |
| M0007 |             | 0.87018 |      |     |                 |                 |
| 5     | V\$GATA1_01 | 8       | 268  | (+) | SNNGATNNNN      | CATGATTATG      |
| M0007 |             | 0.82589 |      |     |                 |                 |
| 6     | V\$GATA2_01 | 1       | 268  | (+) | NNNGATRNNN      | CATGATTATG      |
| M0007 |             | 0.87638 |      |     |                 |                 |
| 7     | V\$GATA3_01 | 5       | 269  | (+) | NNGATARNG       | ATGATTATG       |
| M0012 |             | 0.80312 |      |     |                 |                 |
| 6     | V\$GATA1_02 | 5       | 272  | (+) | NNNNNGATANKGNN  | ATTATGATATTAGT  |



|       |             |         |     |     |                 |                |
|-------|-------------|---------|-----|-----|-----------------|----------------|
| M0012 |             |         |     |     |                 |                |
| 8     | V\$GATA1_04 | 0.83701 | 273 | (+) | NNCWGATARNNNN   | TTATGATATTAGT  |
| M0007 |             | 0.80454 |     |     |                 |                |
| 5     | V\$GATA1_01 | 1       | 274 | (+) | SNNGATNNNN      | TATGATATTA     |
| M0007 |             | 0.85340 |     |     |                 |                |
| 6     | V\$GATA2_01 | 6       | 274 | (+) | NNNGATRNNN      | TATGATATTA     |
| M0007 |             | 0.84315 |     |     |                 |                |
| 7     | V\$GATA3_01 | 5       | 275 | (+) | NNGATARNG       | ATGATATTA      |
| M0007 |             |         |     |     |                 |                |
| 7     | V\$GATA3_01 | 0.86132 | 287 | (-) | NNGATARNG       | TCTAATCTA      |
| M0007 |             | 0.80288 |     |     |                 |                |
| 6     | V\$GATA2_01 | 7       | 293 | (-) | NNNGATRNNN      | CTAAATCTTA     |
| M0007 |             | 0.84802 |     |     |                 |                |
| 7     | V\$GATA3_01 | 8       | 293 | (-) | NNGATARNG       | CTAAATCTT      |
| M0007 |             | 0.79220 |     |     |                 |                |
| 5     | V\$GATA1_01 | 1       | 300 | (+) | SNNGATNNNN      | TTAGATTCTG     |
| M0007 |             | 0.82454 |     |     |                 |                |
| 7     | V\$GATA3_01 | 6       | 301 | (+) | NNGATARNG       | TAGATTCTG      |
| M0012 |             | 0.81937 |     |     |                 |                |
| 6     | V\$GATA1_02 | 5       | 316 | (+) | NNNNNGATANKGNN  | GTTATGATAAAATT |
| M0012 |             | 0.87530 |     |     |                 |                |
| 8     | V\$GATA1_04 | 6       | 317 | (+) | NNCWGATARNNNN   | TTATGATAAAATT  |
| M0007 |             | 0.79837 |     |     |                 |                |
| 6     | V\$GATA2_01 | 6       | 318 | (+) | NNNGATRNNN      | TATGATAAAA     |
| M0007 |             | 0.85511 |     |     |                 |                |
| 7     | V\$GATA3_01 | 7       | 319 | (+) | NNGATARNG       | ATGATAAAA      |
| M0020 |             | 0.89499 |     |     |                 |                |
| 3     | V\$GATA_C   | 8       | 320 | (+) | NGATAAGNMNN     | TGATAAAATTT    |
| M0012 |             | 0.78515 |     |     |                 |                |
| 7     | V\$GATA1_03 | 4       | 331 | (-) | RNSNNGATAANNNGN | ATTTTAACTTCAC  |
| M0007 |             | 0.83316 |     |     |                 |                |
| 5     | V\$GATA1_01 | 9       | 358 | (+) | SNNGATNNNN      | CAAGATTTGA     |
| M0007 |             | 0.81551 |     |     |                 |                |
| 6     | V\$GATA2_01 | 6       | 358 | (+) | NNNGATRNNN      | CAAGATTTGA     |
| M0007 |             | 0.85378 |     |     |                 |                |
| 7     | V\$GATA3_01 | 8       | 359 | (+) | NNGATARNG       | AAGATTTGA      |
| M0012 |             | 0.82062 |     |     |                 |                |
| 6     | V\$GATA1_02 | 5       | 361 | (+) | NNNNNGATANKGNN  | GATTTGATACTTGC |
| M0007 |             | 0.82527 |     |     |                 |                |
| 5     | V\$GATA1_01 | 1       | 363 | (+) | SNNGATNNNN      | TTTGATACTT     |
| M0007 |             |         |     |     |                 |                |
| 6     | V\$GATA2_01 | 0.81281 | 363 | (+) | NNNGATRNNN      | TTTGATACTT     |
| M0007 |             | 0.83711 |     |     |                 |                |
| 5     | V\$GATA1_01 | 7       | 393 | (+) | SNNGATNNNN      | GTAGATTCTT     |
| M0007 |             | 0.81235 |     |     |                 |                |
| 6     | V\$GATA2_01 | 9       | 415 | (-) | NNNGATRNNN      | AAGTATGTTC     |
| M0007 |             | 0.79341 |     |     |                 |                |
| 6     | V\$GATA2_01 | 5       | 424 | (+) | NNNGATRNNN      | CAAGACAGTG     |
| M0012 |             | 0.83194 |     |     |                 |                |
| 7     | V\$GATA1_03 | 5       | 473 | (+) | RNSNNGATAANNNGN | AGGAAGATGAAAGT |
| M0007 |             |         |     |     |                 |                |
| 5     | V\$GATA1_01 | 0.78233 | 475 | (+) | SNNGATNNNN      | GAAGATGAAA     |
| M0007 |             |         |     |     |                 |                |
| 6     | V\$GATA2_01 | 0.79567 | 475 | (+) | NNNGATRNNN      | GAAGATGAAA     |
| M0007 |             | 0.82498 |     |     |                 |                |
| 7     | V\$GATA3_01 | 9       | 476 | (+) | NNGATARNG       | AAGATGAAA      |
| M0007 |             |         |     |     |                 |                |
| 6     | V\$GATA2_01 | 0.79161 | 488 | (+) | NNNGATRNNN      | CAGCATAATC     |
| M0007 |             | 0.80898 |     |     |                 |                |
| 5     | V\$GATA1_01 | 3       | 491 | (-) | SNNGATNNNN      | CATAATCCAG     |
| M0007 |             | 0.83030 |     |     |                 |                |
| 7     | V\$GATA3_01 | 6       | 491 | (-) | NNGATARNG       | CATAATCCA      |
| M0007 |             | 0.88450 |     |     |                 |                |
| 5     | V\$GATA1_01 | 1       | 497 | (+) | SNNGATNNNN      | CCAGATTGAT     |
| M0007 |             | 0.84348 |     |     |                 |                |
| 6     | V\$GATA2_01 | 2       | 497 | (+) | NNNGATRNNN      | CCAGATTGAT     |

|       |             |         |     |     |                 |                 |
|-------|-------------|---------|-----|-----|-----------------|-----------------|
| M0007 |             | 0.83562 |     |     |                 |                 |
| 7     | V\$GATA3_01 | 3       | 498 | (+) | NNGATARNG       | CAGATTGAT       |
| M0012 |             | 0.78270 |     |     |                 |                 |
| 7     | V\$GATA1_03 | 5       | 541 | (+) | RNSNNGATAANNNGN | AAGGTTATAATTTTC |
| M0007 |             | 0.79025 |     |     |                 |                 |
| 6     | V\$GATA2_01 | 7       | 558 | (+) | NNNGATRNNN      | TGTCATAGTA      |
| M0007 |             | 0.77393 |     |     |                 |                 |
| 5     | V\$GATA1_01 | 9       | 580 | (-) | SNNGATNNNN      | AAATAACAGG      |
| M0020 |             | 0.83721 |     |     |                 |                 |
| 3     | V\$GATA_C   | 7       | 587 | (-) | NGATAAGNMNN     | AGGACTTATAC     |
| M0007 |             | 0.80784 |     |     |                 |                 |
| 6     | V\$GATA2_01 | 8       | 594 | (-) | NNNGATRNNN      | ATACATCCTT      |
| M0007 |             | 0.77492 |     |     |                 |                 |
| 5     | V\$GATA1_01 | 6       | 604 | (+) | SNNGATNNNN      | CATGAAAGCT      |
| M0007 |             | 0.84797 |     |     |                 |                 |
| 5     | V\$GATA1_01 | 6       | 639 | (+) | SNNGATNNNN      | CTGGATTGCC      |
| M0007 |             | 0.82363 |     |     |                 |                 |
| 6     | V\$GATA2_01 | 6       | 639 | (+) | NNNGATRNNN      | CTGGATTGCC      |
| M0012 |             | 0.86562 |     |     |                 |                 |
| 6     | V\$GATA1_02 | 5       | 687 | (+) | NNNNNGATANKGNN  | TAACTGATAAGAAT  |
| M0012 |             | 0.78833 |     |     |                 |                 |
| 7     | V\$GATA1_03 | 9       | 687 | (+) | RNSNNGATAANNNGN | TAACTGATAAGAAT  |
| M0012 |             | 0.96109 |     |     |                 |                 |
| 8     | V\$GATA1_04 | 1       | 688 | (+) | NNCWGATARNNNN   | AACTGATAAGAAT   |
| M0007 |             | 0.81095 |     |     |                 |                 |
| 5     | V\$GATA1_01 | 8       | 689 | (+) | SNNGATNNNN      | ACTGATAAGA      |
| M0007 |             | 0.82047 |     |     |                 |                 |
| 6     | V\$GATA2_01 | 8       | 689 | (+) | NNNGATRNNN      | ACTGATAAGA      |
| M0007 |             |         |     |     |                 |                 |
| 7     | V\$GATA3_01 | 0.89012 | 690 | (+) | NNGATARNG       | CTGATAAGA       |
| M0020 |             | 0.92264 |     |     |                 |                 |
| 3     | V\$GATA_C   | 7       | 691 | (+) | NGATAAGNMNN     | TGATAAGAATG     |
| M0020 |             |         |     |     |                 |                 |
| 3     | V\$GATA_C   | 0.84374 | 700 | (-) | NGATAAGNMNN     | TGGTCTTATTT     |
| M0012 |             | 0.80181 |     |     |                 |                 |
| 7     | V\$GATA1_03 | 3       | 701 | (-) | RNSNNGATAANNNGN | GGTCTTATTTCTCT  |
| M0012 |             | 0.79397 |     |     |                 |                 |
| 7     | V\$GATA1_03 | 4       | 731 | (+) | RNSNNGATAANNNGN | AAAAAGAGAATAAC  |
| M0012 |             | 0.81455 |     |     |                 |                 |
| 7     | V\$GATA1_03 | 2       | 734 | (+) | RNSNNGATAANNNGN | AAGAGAATAACTAC  |
| M0007 |             | 0.88005 |     |     |                 |                 |
| 5     | V\$GATA1_01 | 9       | 758 | (+) | SNNGATNNNN      | CAAGATGTTT      |
| M0007 |             | 0.87505 |     |     |                 |                 |
| 6     | V\$GATA2_01 | 6       | 758 | (+) | NNNGATRNNN      | CAAGATGTTT      |
| M0007 |             | 0.83316 |     |     |                 |                 |
| 5     | V\$GATA1_01 | 9       | 781 | (+) | SNNGATNNNN      | TGTGATATCA      |
| M0007 |             | 0.88046 |     |     |                 |                 |
| 6     | V\$GATA2_01 | 9       | 781 | (+) | NNNGATRNNN      | TGTGATATCA      |
| M0012 |             | 0.83272 |     |     |                 |                 |
| 8     | V\$GATA1_04 | 1       | 781 | (-) | NNCWGATARNNNN   | TGTGATATCATTT   |
| M0007 |             | 0.84448 |     |     |                 |                 |
| 7     | V\$GATA3_01 | 4       | 782 | (+) | NNGATARNG       | GTGATATCA       |
| M0007 |             |         |     |     |                 |                 |
| 5     | V\$GATA1_01 | 0.79615 | 783 | (-) | SNNGATNNNN      | TGATATCATT      |
| M0007 |             | 0.83987 |     |     |                 |                 |
| 6     | V\$GATA2_01 | 4       | 783 | (-) | NNNGATRNNN      | TGATATCATT      |
| M0007 |             | 0.82720 |     |     |                 |                 |
| 7     | V\$GATA3_01 | 4       | 783 | (-) | NNGATARNG       | TGATATCAT       |
| M0007 |             | 0.84402 |     |     |                 |                 |
| 5     | V\$GATA1_01 | 8       | 815 | (+) | SNNGATNNNN      | CATGATTCAC      |
| M0007 |             | 0.79521 |     |     |                 |                 |
| 6     | V\$GATA2_01 | 9       | 815 | (+) | NNNGATRNNN      | CATGATTCAC      |
| M0007 |             | 0.80700 |     |     |                 |                 |
| 5     | V\$GATA1_01 | 9       | 845 | (-) | SNNGATNNNN      | TACAATCTTA      |
| M0007 |             | 0.83671 |     |     |                 |                 |
| 6     | V\$GATA2_01 | 6       | 845 | (-) | NNNGATRNNN      | TACAATCTTA      |

|       |             |         |      |     |                |                |
|-------|-------------|---------|------|-----|----------------|----------------|
| M0007 |             | 0.89322 |      |     |                |                |
| 7     | V\$GATA3_01 | 1       | 845  | (-) | NNGATARNG      | TACAATCTT      |
| M0007 |             | 0.81885 |      |     |                |                |
| 5     | V\$GATA1_01 | 5       | 909  | (-) | SNNGATNNNN     | TGTAATCATC     |
| M0007 |             | 0.80739 |      |     |                |                |
| 6     | V\$GATA2_01 | 7       | 909  | (-) | NNNGATRNNN     | TGTAATCATC     |
| M0007 |             | 0.82543 |      |     |                |                |
| 7     | V\$GATA3_01 | 2       | 909  | (-) | NNGATARNG      | TGTAATCAT      |
| M0012 |             | 0.80083 |      |     |                |                |
| 7     | V\$GATA1_03 | 3       | 910  | (-) | RNSNNGATAANNGN | GTAATCATCAAGCT |
| M0007 |             | 0.84649 |      |     |                |                |
| 5     | V\$GATA1_01 | 6       | 912  | (-) | SNNGATNNNN     | AATCATCAAG     |
| M0012 |             | 0.82116 |      |     |                |                |
| 7     | V\$GATA1_03 | 6       | 920  | (+) | RNSNNGATAANNGN | AGCTTAATAAGAGA |
| M0012 |             | 0.81062 |      |     |                |                |
| 6     | V\$GATA1_02 | 5       | 932  | (+) | NNNNNGATANKGNN | GACTAGATATTAAT |
| M0007 |             |         |      |     |                |                |
| 5     | V\$GATA1_01 | 0.80849 | 934  | (+) | SNNGATNNNN     | CTAGATATTA     |
| M0007 |             | 0.79206 |      |     |                |                |
| 6     | V\$GATA2_01 | 1       | 934  | (+) | NNNGATRNNN     | CTAGATATTA     |
| M0007 |             | 0.84226 |      |     |                |                |
| 7     | V\$GATA3_01 | 8       | 935  | (+) | NNGATARNG      | TAGATATTA      |
| M0012 |             | 0.83812 |      |     |                |                |
| 6     | V\$GATA1_02 | 5       | 964  | (+) | NNNNNGATANKGNN | GAAATGATAATTAT |
| M0012 |             | 0.85521 |      |     |                |                |
| 7     | V\$GATA1_03 | 8       | 964  | (+) | RNSNNGATAANNGN | GAAATGATAATTAT |
| M0012 |             | 0.88541 |      |     |                |                |
| 8     | V\$GATA1_04 | 7       | 965  | (+) | NNCWGATARNNNN  | AAATGATAATTAT  |
| M0007 |             | 0.81342 |      |     |                |                |
| 5     | V\$GATA1_01 | 5       | 966  | (+) | SNNGATNNNN     | AATGATAATT     |
| M0007 |             | 0.83581 |      |     |                |                |
| 6     | V\$GATA2_01 | 4       | 966  | (+) | NNNGATRNNN     | AATGATAATT     |
| M0007 |             | 0.84315 |      |     |                |                |
| 7     | V\$GATA3_01 | 5       | 967  | (+) | NNGATARNG      | ATGATAATT      |
| M0020 |             | 0.85119 |      |     |                |                |
| 3     | V\$GATA_C   | 6       | 968  | (+) | NGATAAGNMNN    | TGATAATTATG    |
| M0020 |             | 0.88070 |      |     |                |                |
| 3     | V\$GATA_C   | 8       | 994  | (-) | NGATAAGNMNN    | GTTAATTATCA    |
| M0012 |             |         |      |     |                |                |
| 6     | V\$GATA1_02 | 0.8525  | 995  | (-) | NNNNNGATANKGNN | TTAATTATCAATAC |
| M0012 |             | 0.85521 |      |     |                |                |
| 7     | V\$GATA1_03 | 8       | 995  | (-) | RNSNNGATAANNGN | TTAATTATCAATAC |
| M0012 |             | 0.82536 |      |     |                |                |
| 8     | V\$GATA1_04 | 8       | 995  | (-) | NNCWGATARNNNN  | TTAATTATCAATA  |
| M0007 |             | 0.77739 |      |     |                |                |
| 5     | V\$GATA1_01 | 4       | 997  | (-) | SNNGATNNNN     | AATTATCAAT     |
| M0007 |             | 0.79170 |      |     |                |                |
| 5     | V\$GATA1_01 | 8       | 1012 | (-) | SNNGATNNNN     | TGCAATCAAA     |
| M0007 |             |         |      |     |                |                |
| 7     | V\$GATA3_01 | 0.82942 | 1012 | (-) | NNGATARNG      | TGCAATCAA      |
| M0007 |             | 0.80700 |      |     |                |                |
| 5     | V\$GATA1_01 | 9       | 1023 | (+) | SNNGATNNNN     | TATGATGCAC     |
| M0007 |             | 0.82228 |      |     |                |                |
| 6     | V\$GATA2_01 | 2       | 1023 | (+) | NNNGATRNNN     | TATGATGCAC     |
| M0007 |             | 0.87561 |      |     |                |                |
| 5     | V\$GATA1_01 | 7       | 1169 | (-) | SNNGATNNNN     | AACAATCAGT     |
| M0007 |             | 0.83085 |      |     |                |                |
| 6     | V\$GATA2_01 | 3       | 1169 | (-) | NNNGATRNNN     | AACAATCAGT     |
| M0007 |             | 0.83207 |      |     |                |                |
| 7     | V\$GATA3_01 | 8       | 1169 | (-) | NNGATARNG      | AACAATCAG      |
| M0020 |             | 0.83224 |      |     |                |                |
| 3     | V\$GATA_C   | 6       | 1211 | (-) | NGATAAGNMNN    | AGTCTTTTCC     |
| M0012 |             | 0.80781 |      |     |                |                |
| 6     | V\$GATA1_02 | 3       | 1224 | (+) | NNNNNGATANKGNN | TCAGTGATATTCCA |
| M0007 |             | 0.84550 |      |     |                |                |
| 5     | V\$GATA1_01 | 8       | 1226 | (+) | SNNGATNNNN     | AGTGATATTC     |

|       |             |         |      |     |                 |                |
|-------|-------------|---------|------|-----|-----------------|----------------|
| M0007 |             |         |      |     |                 |                |
| 6     | V\$GATA2_01 | 0.85521 | 1226 | (+) | NNNGATRNNN      | AGTGATATTC     |
| M0007 |             | 0.82853 |      |     |                 |                |
| 7     | V\$GATA3_01 | 3       | 1227 | (+) | NNGATARNG       | GTGATATTC      |
| M0007 |             | 0.83267 |      |     |                 |                |
| 5     | V\$GATA1_01 | 5       | 1233 | (-) | SNNGATNNNN      | TTCCATCAGA     |
| M0007 |             | 0.82949 |      |     |                 |                |
| 6     | V\$GATA2_01 | 9       | 1233 | (-) | NNNGATRNNN      | TTCCATCAGA     |
| M0007 |             | 0.82410 |      |     |                 |                |
| 7     | V\$GATA3_01 | 3       | 1233 | (-) | NNGATARNG       | TTCCATCAG      |
| M0012 |             | 0.81862 |      |     |                 |                |
| 8     | V\$GATA1_04 | 7       | 1280 | (-) | NNCWGATARNNNN   | ATTCTTACCTGGA  |
| M0020 |             | 0.87977 |      |     |                 |                |
| 3     | V\$GATA_C   | 6       | 1321 | (-) | NGATAAGNMNN     | GCTCTTTATCA    |
| M0012 |             | 0.80312 |      |     |                 |                |
| 6     | V\$GATA1_02 | 5       | 1322 | (-) | NNNNNGATANKGNN  | CTCTTTATCAAGCC |
| M0012 |             | 0.88167 |      |     |                 |                |
| 7     | V\$GATA1_03 | 6       | 1322 | (-) | RNSNNGATAANNNGN | CTCTTTATCAAGCC |
| M0012 |             | 0.88725 |      |     |                 |                |
| 8     | V\$GATA1_04 | 5       | 1322 | (-) | NNCWGATARNNNN   | CTCTTTATCAAGC  |
| M0007 |             | 0.81836 |      |     |                 |                |
| 5     | V\$GATA1_01 | 1       | 1324 | (-) | SNNGATNNNN      | CTTTATCAAG     |
| M0007 |             | 0.86575 |      |     |                 |                |
| 7     | V\$GATA3_01 | 1       | 1324 | (-) | NNGATARNG       | CTTTATCAA      |
| M0012 |             | 0.93018 |      |     |                 |                |
| 7     | V\$GATA1_03 | 1       | 1398 | (+) | RNSNNGATAANNNGN | AGCATGATAACAAT |
| M0012 |             | 0.89767 |      |     |                 |                |
| 8     | V\$GATA1_04 | 2       | 1399 | (+) | NNCWGATARNNNN   | GCATGATAACAAT  |
| M0007 |             | 0.84698 |      |     |                 |                |
| 5     | V\$GATA1_01 | 9       | 1400 | (+) | SNNGATNNNN      | CATGATAACA     |
| M0007 |             | 0.86648 |      |     |                 |                |
| 6     | V\$GATA2_01 | 6       | 1400 | (+) | NNNGATRNNN      | CATGATAACA     |
| M0007 |             | 0.85910 |      |     |                 |                |
| 7     | V\$GATA3_01 | 5       | 1401 | (+) | NNGATARNG       | ATGATAACA      |
| M0020 |             | 0.84964 |      |     |                 |                |
| 3     | V\$GATA_C   | 3       | 1402 | (+) | NGATAAGNMNN     | TGATAACAATG    |
| M0007 |             | 0.85192 |      |     |                 |                |
| 5     | V\$GATA1_01 | 5       | 1420 | (+) | SNNGATNNNN      | CAAGATGTAG     |
| M0007 |             | 0.84799 |      |     |                 |                |
| 6     | V\$GATA2_01 | 3       | 1420 | (+) | NNNGATRNNN      | CAAGATGTAG     |
| M0007 |             |         |      |     |                 |                |
| 7     | V\$GATA3_01 | 0.82809 | 1421 | (+) | NNGATARNG       | AAGATGTAG      |
| M0007 |             | 0.81688 |      |     |                 |                |
| 5     | V\$GATA1_01 | 1       | 1447 | (+) | SNNGATNNNN      | CAAGATTAT      |
| M0007 |             | 0.79882 |      |     |                 |                |
| 6     | V\$GATA2_01 | 7       | 1447 | (+) | NNNGATRNNN      | CAAGATTAT      |
| M0007 |             | 0.78874 |      |     |                 |                |
| 5     | V\$GATA1_01 | 6       | 1483 | (+) | SNNGATNNNN      | TATGATCTTT     |
| M0007 |             | 0.81867 |      |     |                 |                |
| 6     | V\$GATA2_01 | 4       | 1483 | (+) | NNNGATRNNN      | TATGATCTTT     |
| M0012 |             |         |      |     |                 |                |
| 8     | V\$GATA1_04 | 0.81587 | 1518 | (+) | NNCWGATARNNNN   | ATCAAATAAATAG  |
| M0012 |             | 0.89343 |      |     |                 |                |
| 6     | V\$GATA1_02 | 7       | 1558 | (+) | NNNNNGATANKGNN  | AGAAAGATAAGGTT |
| M0012 |             | 0.89882 |      |     |                 |                |
| 7     | V\$GATA1_03 | 4       | 1558 | (+) | RNSNNGATAANNNGN | AGAAAGATAAGGTT |
| M0012 |             | 0.90992 |      |     |                 |                |
| 8     | V\$GATA1_04 | 6       | 1559 | (+) | NNCWGATARNNNN   | GAAAGATAAGGTT  |
| M0007 |             | 0.81638 |      |     |                 |                |
| 5     | V\$GATA1_01 | 7       | 1560 | (+) | SNNGATNNNN      | AAAGATAAGG     |
| M0007 |             | 0.86648 |      |     |                 |                |
| 6     | V\$GATA2_01 | 6       | 1560 | (+) | NNNGATRNNN      | AAAGATAAGG     |
| M0007 |             | 0.95436 |      |     |                 |                |
| 7     | V\$GATA3_01 | 4       | 1561 | (+) | NNGATARNG       | AAGATAAGG      |
| M0020 |             |         |      |     |                 |                |
| 3     | V\$GATA_C   | 0.93352 | 1562 | (+) | NGATAAGNMNN     | AGATAAGGTTA    |

|       |             |         |      |     |                |                |
|-------|-------------|---------|------|-----|----------------|----------------|
| M0012 |             | 0.82802 |      |     |                |                |
| 7     | V\$GATA1_03 | 5       | 1594 | (+) | RNSNNGATAANNGN | ATCCAGAAAAGTGT |
| M0020 |             | 0.90090 |      |     |                |                |
| 3     | V\$GATA_C   | 1       | 1610 | (-) | NGATAAGNMNN    | TTGTCATATCT    |
| M0007 |             | 0.80243 |      |     |                |                |
| 6     | V\$GATA2_01 | 6       | 1611 | (+) | NNNGATRNNN     | TGTCATATCT     |
| M0012 |             | 0.79093 |      |     |                |                |
| 6     | V\$GATA1_02 | 7       | 1611 | (-) | NNNNNGATANKGNN | TGTCATATCTTACA |
| M0012 |             | 0.87622 |      |     |                |                |
| 8     | V\$GATA1_04 | 5       | 1611 | (-) | NNCWGATARNNNN  | TGTCATATCTTAC  |
| M0007 |             |         |      |     |                |                |
| 5     | V\$GATA1_01 | 0.79615 | 1613 | (-) | SNNGATNNNN     | TCATATCTTA     |
| M0007 |             | 0.87099 |      |     |                |                |
| 6     | V\$GATA2_01 | 7       | 1613 | (-) | NNNGATRNNN     | TCATATCTTA     |
| M0007 |             | 0.88746 |      |     |                |                |
| 7     | V\$GATA3_01 | 1       | 1613 | (-) | NNGATARNG      | TCATATCTT      |
| M0012 |             | 0.80083 |      |     |                |                |
| 7     | V\$GATA1_03 | 3       | 1641 | (+) | RNSNNGATAANNGN | ATCAAGCTAATTAT |
| M0007 |             | 0.79812 |      |     |                |                |
| 5     | V\$GATA1_01 | 4       | 1661 | (+) | SNNGATNNNN     | TATGATTACT     |
| M0007 |             | 0.82273 |      |     |                |                |
| 6     | V\$GATA2_01 | 3       | 1661 | (+) | NNNGATRNNN     | TATGATTACT     |
| M0012 |             | 0.81063 |      |     |                |                |
| 7     | V\$GATA1_03 | 2       | 1675 | (+) | RNSNNGATAANNGN | AAGCAGATTATGAA |
| M0007 |             | 0.86574 |      |     |                |                |
| 5     | V\$GATA1_01 | 5       | 1677 | (+) | SNNGATNNNN     | GCAGATTATG     |
| M0007 |             | 0.85069 |      |     |                |                |
| 6     | V\$GATA2_01 | 9       | 1677 | (+) | NNNGATRNNN     | GCAGATTATG     |
| M0007 |             | 0.89410 |      |     |                |                |
| 7     | V\$GATA3_01 | 7       | 1678 | (+) | NNGATARNG      | CAGATTATG      |
| M0007 |             | 0.78134 |      |     |                |                |
| 5     | V\$GATA1_01 | 3       | 1694 | (-) | SNNGATNNNN     | CAGTTTCAGG     |
| M0012 |             | 0.79531 |      |     |                |                |
| 6     | V\$GATA1_02 | 2       | 1698 | (+) | NNNNNGATANKGNN | TTCAGGATACTCCC |
| M0007 |             | 0.88203 |      |     |                |                |
| 5     | V\$GATA1_01 | 4       | 1700 | (+) | SNNGATNNNN     | CAGGATACTC     |
| M0007 |             | 0.92557 |      |     |                |                |
| 6     | V\$GATA2_01 | 5       | 1700 | (+) | NNNGATRNNN     | CAGGATACTC     |
| M0012 |             |         |      |     |                |                |
| 6     | V\$GATA1_02 | 0.80375 | 1710 | (-) | NNNNNGATANKGNN | CCCCCAATCTCTTT |
| M0012 |             | 0.79764 |      |     |                |                |
| 7     | V\$GATA1_03 | 8       | 1710 | (-) | RNSNNGATAANNGN | CCCCCAATCTCTTT |
| M0007 |             | 0.88647 |      |     |                |                |
| 5     | V\$GATA1_01 | 6       | 1712 | (-) | SNNGATNNNN     | CCCAATCTCT     |
| M0007 |             | 0.86152 |      |     |                |                |
| 6     | V\$GATA2_01 | 5       | 1712 | (-) | NNNGATRNNN     | CCCAATCTCT     |
| M0007 |             | 0.96632 |      |     |                |                |
| 7     | V\$GATA3_01 | 7       | 1712 | (-) | NNGATARNG      | CCCAATCTC      |
| M0007 |             | 0.85241 |      |     |                |                |
| 5     | V\$GATA1_01 | 9       | 1739 | (-) | SNNGATNNNN     | ATCAATCACA     |
| M0007 |             | 0.82318 |      |     |                |                |
| 6     | V\$GATA2_01 | 4       | 1739 | (-) | NNNGATRNNN     | ATCAATCACA     |
| M0007 |             | 0.83517 |      |     |                |                |
| 7     | V\$GATA3_01 | 9       | 1739 | (-) | NNGATARNG      | ATCAATCAC      |
| M0012 |             |         |      |     |                |                |
| 6     | V\$GATA1_02 | 0.8625  | 1810 | (+) | NNNNNGATANKGNN | GGCCAGATAAAGGG |
| M0012 |             | 0.92797 |      |     |                |                |
| 7     | V\$GATA1_03 | 6       | 1810 | (+) | RNSNNGATAANNGN | GGCCAGATAAAGGG |
| M0012 |             | 0.95833 |      |     |                |                |
| 8     | V\$GATA1_04 | 3       | 1811 | (+) | NNCWGATARNNNN  | GCCAGATAAAGGG  |
| M0007 |             | 0.85439 |      |     |                |                |
| 5     | V\$GATA1_01 | 3       | 1812 | (+) | SNNGATNNNN     | CCAGATAAAG     |
| M0007 |             | 0.86964 |      |     |                |                |
| 6     | V\$GATA2_01 | 4       | 1812 | (+) | NNNGATRNNN     | CCAGATAAAG     |
| M0007 |             | 0.90784 |      |     |                |                |
| 7     | V\$GATA3_01 | 2       | 1813 | (+) | NNGATARNG      | CAGATAAAG      |

|       |             |         |      |     |                 |                |
|-------|-------------|---------|------|-----|-----------------|----------------|
| M0020 |             | 0.86890 |      |     |                 |                |
| 3     | V\$GATA_C   | 3       | 1814 | (+) | NGATAAGNMNN     | AGATAAAGGGA    |
| M0012 |             | 0.81479 |      |     |                 |                |
| 7     | V\$GATA1_03 | 7       | 1837 | (+) | RNSNNGATAANNNGN | AAGTAGAGAATAGA |
| M0007 |             | 0.89881 |      |     |                 |                |
| 5     | V\$GATA1_01 | 5       | 1854 | (+) | SNNGATNNNN      | CAAGATGGAG     |
| M0007 |             | 0.88452 |      |     |                 |                |
| 6     | V\$GATA2_01 | 9       | 1854 | (+) | NNNGATRNNN      | CAAGATGGAG     |
| M0007 |             | 0.88834 |      |     |                 |                |
| 7     | V\$GATA3_01 | 7       | 1855 | (+) | NNGATARNG       | AAGATGGAG      |
| M0012 |             | 0.81553 |      |     |                 |                |
| 7     | V\$GATA1_03 | 2       | 1858 | (+) | RNSNNGATAANNNGN | ATGGAGATCAGTTC |
| M0007 |             | 0.84698 |      |     |                 |                |
| 5     | V\$GATA1_01 | 9       | 1860 | (+) | SNNGATNNNN      | GGAGATCAGT     |
| M0007 |             | 0.78627 |      |     |                 |                |
| 5     | V\$GATA1_01 | 8       | 1860 | (-) | SNNGATNNNN      | GGAGATCAGT     |
| M0007 |             | 0.84393 |      |     |                 |                |
| 6     | V\$GATA2_01 | 3       | 1860 | (+) | NNNGATRNNN      | GGAGATCAGT     |
| M0007 |             | 0.80965 |      |     |                 |                |
| 6     | V\$GATA2_01 | 3       | 1860 | (-) | NNNGATRNNN      | GGAGATCAGT     |
| M0012 |             | 0.81617 |      |     |                 |                |
| 8     | V\$GATA1_04 | 6       | 1898 | (-) | NNCWGATARNNNN   | TTTCTTACCTGAA  |
| M0012 |             | 0.77062 |      |     |                 |                |
| 6     | V\$GATA1_02 | 5       | 1931 | (-) | NNNNNGATANKGNN  | AAAGCTATCTAATT |
| M0012 |             | 0.82904 |      |     |                 |                |
| 8     | V\$GATA1_04 | 4       | 1931 | (-) | NNCWGATARNNNN   | AAAGCTATCTAAT  |
| M0007 |             | 0.83020 |      |     |                 |                |
| 5     | V\$GATA1_01 | 7       | 1933 | (-) | SNNGATNNNN      | AGCTATCTAA     |
| M0007 |             |         |      |     |                 |                |
| 6     | V\$GATA2_01 | 0.86829 | 1933 | (-) | NNNGATRNNN      | AGCTATCTAA     |
| M0007 |             | 0.85467 |      |     |                 |                |
| 7     | V\$GATA3_01 | 4       | 1933 | (-) | NNGATARNG       | AGCTATCTA      |
| M0020 |             | 0.84249 |      |     |                 |                |
| 3     | V\$GATA_C   | 8       | 1962 | (-) | NGATAAGNMNN     | ATGCCTCATCT    |
| M0012 |             | 0.78564 |      |     |                 |                |
| 7     | V\$GATA1_03 | 4       | 1963 | (-) | RNSNNGATAANNNGN | TGCCTCATCTTTCT |
| M0007 |             | 0.81638 |      |     |                 |                |
| 5     | V\$GATA1_01 | 7       | 1965 | (-) | SNNGATNNNN      | CCTCATCTTT     |
| M0007 |             | 0.83806 |      |     |                 |                |
| 6     | V\$GATA2_01 | 9       | 1965 | (-) | NNNGATRNNN      | CCTCATCTTT     |
| M0007 |             | 0.90075 |      |     |                 |                |
| 7     | V\$GATA3_01 | 3       | 1965 | (-) | NNGATARNG       | CCTCATCTT      |
| M0020 |             | 0.83845 |      |     |                 |                |
| 3     | V\$GATA_C   | 9       | 1986 | (-) | NGATAAGNMNN     | ACTTTCTATCC    |
| M0012 |             | 0.79176 |      |     |                 |                |
| 7     | V\$GATA1_03 | 9       | 1987 | (-) | RNSNNGATAANNNGN | CTTTCTATCCAAC  |
| M0007 |             | 0.79386 |      |     |                 |                |
| 6     | V\$GATA2_01 | 6       | 1989 | (-) | NNNGATRNNN      | TTCTATCCAA     |
| M0007 |             | 0.83739 |      |     |                 |                |
| 7     | V\$GATA3_01 | 5       | 1989 | (-) | NNGATARNG       | TTCTATCCA      |
| M0007 |             | 0.79115 |      |     |                 |                |
| 6     | V\$GATA2_01 | 9       | 2032 | (+) | NNNGATRNNN      | ATGGATATTC     |
| M0007 |             | 0.83030 |      |     |                 |                |
| 7     | V\$GATA3_01 | 6       | 2076 | (-) | NNGATARNG       | ATTAATCTC      |
| M0012 |             | 0.81862 |      |     |                 |                |
| 8     | V\$GATA1_04 | 7       | 2099 | (-) | NNCWGATARNNNN   | CCACCTATATGCT  |
| M0007 |             | 0.83491 |      |     |                 |                |
| 6     | V\$GATA2_01 | 2       | 2108 | (-) | NNNGATRNNN      | TGCTATGTCC     |
| M0007 |             | 0.77196 |      |     |                 |                |
| 5     | V\$GATA1_01 | 4       | 2132 | (+) | SNNGATNNNN      | ATTGATTCT      |
| M0020 |             | 0.83069 |      |     |                 |                |
| 3     | V\$GATA_C   | 3       | 2136 | (-) | NGATAAGNMNN     | ATTCTTAACT     |
| M0012 |             | 0.81617 |      |     |                 |                |
| 8     | V\$GATA1_04 | 6       | 2137 | (-) | NNCWGATARNNNN   | TTTCTTAACTGAA  |
| M0020 |             | 0.83783 |      |     |                 |                |
| 3     | V\$GATA_C   | 8       | 2150 | (-) | NGATAAGNMNN     | CACTTCTATCT    |

|       |             |         |      |     |                 |                |
|-------|-------------|---------|------|-----|-----------------|----------------|
| M0012 |             | 0.88656 |      |     |                 |                |
| 6     | V\$GATA1_02 | 3       | 2151 | (-) | NNNNNGATANKGNN  | ACTTCTATCTGTAG |
| M0012 |             | 0.84615 |      |     |                 |                |
| 7     | V\$GATA1_03 | 4       | 2151 | (-) | RNSNNGATAANNNGN | ACTTCTATCTGTAG |
| M0012 |             | 0.92034 |      |     |                 |                |
| 8     | V\$GATA1_04 | 3       | 2151 | (-) | NNCWGATARNNNN   | ACTTCTATCTGTA  |
| M0007 |             | 0.80355 |      |     |                 |                |
| 5     | V\$GATA1_01 | 4       | 2153 | (-) | SNNGATNNNN      | TTCTATCTGT     |
| M0007 |             | 0.83671 |      |     |                 |                |
| 6     | V\$GATA2_01 | 6       | 2153 | (-) | NNNGATRNNN      | TTCTATCTGT     |
| M0007 |             | 0.90119 |      |     |                 |                |
| 7     | V\$GATA3_01 | 6       | 2153 | (-) | NNGATARNG       | TTCTATCTG      |
| M0020 |             | 0.88319 |      |     |                 |                |
| 3     | V\$GATA_C   | 4       | 2190 | (-) | NGATAAGNMNN     | CTCTTTTATCT    |
| M0012 |             | 0.81906 |      |     |                 |                |
| 6     | V\$GATA1_02 | 3       | 2191 | (-) | NNNNNGATANKGNN  | TCTTTTATCTAACA |
| M0012 |             | 0.87806 |      |     |                 |                |
| 8     | V\$GATA1_04 | 4       | 2191 | (-) | NNCWGATARNNNN   | TCTTTTATCTAAC  |
| M0007 |             | 0.85423 |      |     |                 |                |
| 7     | V\$GATA3_01 | 1       | 2193 | (-) | NNGATARNG       | TTTTATCTA      |
| M0007 |             | 0.84896 |      |     |                 |                |
| 5     | V\$GATA1_01 | 3       | 2204 | (+) | SNNGATNNNN      | AGTGATTTGT     |
| M0007 |             | 0.80063 |      |     |                 |                |
| 6     | V\$GATA2_01 | 1       | 2204 | (+) | NNNGATRNNN      | AGTGATTTGT     |
| M0007 |             | 0.77936 |      |     |                 |                |
| 5     | V\$GATA1_01 | 8       | 2329 | (+) | SNNGATNNNN      | CAGGATTAAC     |
| M0007 |             | 0.79476 |      |     |                 |                |
| 6     | V\$GATA2_01 | 8       | 2329 | (+) | NNNGATRNNN      | CAGGATTAAC     |
| M0007 |             |         |      |     |                 |                |
| 6     | V\$GATA2_01 | 0.7871  | 2358 | (+) | NNNGATRNNN      | TAACATAACC     |
| M0020 |             | 0.89530 |      |     |                 |                |
| 3     | V\$GATA_C   | 9       | 2438 | (-) | NGATAAGNMNN     | TGGCTATATCT    |
| M0012 |             | 0.78343 |      |     |                 |                |
| 6     | V\$GATA1_02 | 8       | 2439 | (-) | NNNNNGATANKGNN  | GGCTATATCTCCCC |
| M0012 |             | 0.79593 |      |     |                 |                |
| 7     | V\$GATA1_03 | 3       | 2439 | (-) | RNSNNGATAANNNGN | GGCTATATCTCCCC |
| M0012 |             | 0.86672 |      |     |                 |                |
| 8     | V\$GATA1_04 | 8       | 2439 | (-) | NNCWGATARNNNN   | GGCTATATCTCCC  |
| M0007 |             | 0.87611 |      |     |                 |                |
| 5     | V\$GATA1_01 | 1       | 2441 | (-) | SNNGATNNNN      | CTATATCTCC     |
| M0007 |             | 0.88994 |      |     |                 |                |
| 6     | V\$GATA2_01 | 1       | 2441 | (-) | NNNGATRNNN      | CTATATCTCC     |
| M0007 |             | 0.89898 |      |     |                 |                |
| 7     | V\$GATA3_01 | 1       | 2441 | (-) | NNGATARNG       | CTATATCTC      |
| M0012 |             | 0.84062 |      |     |                 |                |
| 6     | V\$GATA1_02 | 5       | 2509 | (-) | NNNNNGATANKGNN  | TAAATTATCAGCAA |
| M0012 |             | 0.79617 |      |     |                 |                |
| 7     | V\$GATA1_03 | 8       | 2509 | (-) | RNSNNGATAANNNGN | TAAATTATCAGCAA |
| M0012 |             | 0.85355 |      |     |                 |                |
| 8     | V\$GATA1_04 | 4       | 2509 | (-) | NNCWGATARNNNN   | TAAATTATCAGCA  |
| M0007 |             | 0.89881 |      |     |                 |                |
| 5     | V\$GATA1_01 | 5       | 2511 | (-) | SNNGATNNNN      | AATTATCAGC     |
| M0007 |             | 0.89084 |      |     |                 |                |
| 6     | V\$GATA2_01 | 3       | 2511 | (-) | NNNGATRNNN      | AATTATCAGC     |
| M0007 |             | 0.83739 |      |     |                 |                |
| 7     | V\$GATA3_01 | 5       | 2511 | (-) | NNGATARNG       | AATTATCAG      |
| M0007 |             | 0.81293 |      |     |                 |                |
| 5     | V\$GATA1_01 | 2       | 2522 | (+) | SNNGATNNNN      | ACAGATCCTG     |
| M0007 |             | 0.83662 |      |     |                 |                |
| 5     | V\$GATA1_01 | 4       | 2522 | (-) | SNNGATNNNN      | ACAGATCCTG     |
| M0007 |             |         |      |     |                 |                |
| 6     | V\$GATA2_01 | 0.82995 | 2522 | (+) | NNNGATRNNN      | ACAGATCCTG     |
| M0007 |             |         |      |     |                 |                |
| 6     | V\$GATA2_01 | 0.85972 | 2522 | (-) | NNNGATRNNN      | ACAGATCCTG     |
| M0012 |             | 0.78221 |      |     |                 |                |
| 7     | V\$GATA1_03 | 5       | 2526 | (+) | RNSNNGATAANNNGN | ATCCTGTTAATCTA |

|       |             |         |      |     |                 |                |
|-------|-------------|---------|------|-----|-----------------|----------------|
| M0007 |             | 0.78529 |      |     |                 |                |
| 5     | V\$GATA1_01 | 1       | 2565 | (+) | SNNGATNNNN      | AATGATGAAG     |
| M0007 |             | 0.78033 |      |     |                 |                |
| 6     | V\$GATA2_01 | 4       | 2565 | (+) | NNNGATRNNN      | AATGATGAAG     |
| M0007 |             | 0.83650 |      |     |                 |                |
| 7     | V\$GATA3_01 | 9       | 2566 | (+) | NNGATARNG       | ATGATGAAG      |
| M0020 |             |         |      |     |                 |                |
| 3     | V\$GATA_C   | 0.84343 | 2589 | (-) | NGATAAGNMNN     | TGTGACTATCC    |
| M0012 |             | 0.78312 |      |     |                 |                |
| 6     | V\$GATA1_02 | 5       | 2590 | (-) | NNNNNGATANKGNN  | GTGACTATCCTGGC |
| M0012 |             | 0.88020 |      |     |                 |                |
| 7     | V\$GATA1_03 | 6       | 2590 | (-) | RNSNNGATAANNNGN | GTGACTATCCTGGC |
| M0007 |             |         |      |     |                 |                |
| 5     | V\$GATA1_01 | 0.9077  | 2592 | (-) | SNNGATNNNN      | GA CTATCCTG    |
| M0007 |             | 0.95083 |      |     |                 |                |
| 6     | V\$GATA2_01 | 4       | 2592 | (-) | NNNGATRNNN      | GA CTATCCTG    |
| M0007 |             | 0.84980 |      |     |                 |                |
| 7     | V\$GATA3_01 | 1       | 2592 | (-) | NNGATARNG       | GA CTATCCT     |
| M0007 |             | 0.78726 |      |     |                 |                |
| 5     | V\$GATA1_01 | 6       | 2637 | (-) | SNNGATNNNN      | TCTAATCAGT     |
| M0007 |             | 0.85644 |      |     |                 |                |
| 7     | V\$GATA3_01 | 7       | 2637 | (-) | NNGATARNG       | TCTAATCAG      |
| M0020 |             | 0.89002 |      |     |                 |                |
| 3     | V\$GATA_C   | 8       | 2644 | (-) | NGATAAGNMNN     | AGTTTGTATCA    |
| M0012 |             | 0.78417 |      |     |                 |                |
| 7     | V\$GATA1_03 | 4       | 2719 | (+) | RNSNNGATAANNNGN | AACAAAATAGCTAC |
| M0012 |             | 0.80132 |      |     |                 |                |
| 7     | V\$GATA1_03 | 3       | 2727 | (+) | RNSNNGATAANNNGN | AGCTACATAAGTAA |
| M0020 |             | 0.83224 |      |     |                 |                |
| 3     | V\$GATA_C   | 6       | 2731 | (+) | NGATAAGNMNN     | ACATAAGTAAT    |
| M0012 |             | 0.78980 |      |     |                 |                |
| 7     | V\$GATA1_03 | 9       | 2750 | (-) | RNSNNGATAANNNGN | ACATTTATTTTCT  |
| M0007 |             | 0.82477 |      |     |                 |                |
| 5     | V\$GATA1_01 | 8       | 2782 | (+) | SNNGATNNNN      | CTGGATATTC     |
| M0007 |             | 0.83265 |      |     |                 |                |
| 6     | V\$GATA2_01 | 7       | 2782 | (+) | NNNGATRNNN      | CTGGATATTC     |
| M0007 |             | 0.84501 |      |     |                 |                |
| 5     | V\$GATA1_01 | 5       | 2811 | (-) | SNNGATNNNN      | AGAAATCACA     |
| M0007 |             | 0.84573 |      |     |                 |                |
| 6     | V\$GATA2_01 | 7       | 2811 | (-) | NNNGATRNNN      | AGAAATCACA     |
| M0020 |             | 0.85181 |      |     |                 |                |
| 3     | V\$GATA_C   | 7       | 2818 | (-) | NGATAAGNMNN     | ACACTTTATCA    |
| M0012 |             | 0.83906 |      |     |                 |                |
| 6     | V\$GATA1_02 | 2       | 2819 | (-) | NNNNNGATANKGNN  | CACTTTATCATCTA |
| M0012 |             |         |      |     |                 |                |
| 7     | V\$GATA1_03 | 0.7805  | 2819 | (-) | RNSNNGATAANNNGN | CACTTTATCATCTA |
| M0012 |             | 0.89736 |      |     |                 |                |
| 8     | V\$GATA1_04 | 5       | 2819 | (-) | NNCWGATARNNNN   | CACTTTATCATCT  |
| M0007 |             | 0.84995 |      |     |                 |                |
| 5     | V\$GATA1_01 | 1       | 2821 | (-) | SNNGATNNNN      | CTTTATCATC     |
| M0007 |             | 0.85566 |      |     |                 |                |
| 6     | V\$GATA2_01 | 1       | 2821 | (-) | NNNGATRNNN      | CTTTATCATC     |
| M0007 |             |         |      |     |                 |                |
| 7     | V\$GATA3_01 | 0.89012 | 2821 | (-) | NNGATARNG       | CTTTATCAT      |
| M0007 |             | 0.79022 |      |     |                 |                |
| 5     | V\$GATA1_01 | 7       | 2824 | (-) | SNNGATNNNN      | TATCATCTAG     |
| M0007 |             | 0.82055 |      |     |                 |                |
| 7     | V\$GATA3_01 | 8       | 2824 | (-) | NNGATARNG       | TATCATCTA      |
| M0012 |             | 0.83976 |      |     |                 |                |
| 8     | V\$GATA1_04 | 7       | 2848 | (-) | NNCWGATARNNNN   | ATTCTTATATGAT  |
| M0012 |             | 0.82281 |      |     |                 |                |
| 6     | V\$GATA1_02 | 2       | 2853 | (+) | NNNNNGATANKGNN  | TATATGATAGAGAA |
| M0012 |             | 0.91023 |      |     |                 |                |
| 8     | V\$GATA1_04 | 3       | 2854 | (+) | NNCWGATARNNNN   | ATATGATAGAGAA  |
| M0007 |             | 0.85883 |      |     |                 |                |
| 5     | V\$GATA1_01 | 5       | 2855 | (+) | SNNGATNNNN      | TATGATAGAG     |



|       |             |         |      |     |                   |                         |
|-------|-------------|---------|------|-----|-------------------|-------------------------|
| M0007 |             | 0.89264 |      |     |                   |                         |
| 6     | V\$GATA2_01 | 8       | 2855 | (+) | NNNGATRNNN        | TATGATAGAG              |
| M0007 |             | 0.91847 |      |     |                   |                         |
| 7     | V\$GATA3_01 | 6       | 2856 | (+) | NNGATARNG         | ATGATAGAG               |
| M0020 |             | 0.89499 |      |     |                   |                         |
| 3     | V\$GATA_C   | 8       | 2857 | (+) | NGATAAGNMNN       | TGATAGAGAAA             |
| M0007 |             | 0.85192 |      |     |                   |                         |
| 5     | V\$GATA1_01 | 5       | 2882 | (-) | SNNGATNNNN        | AAAAATCCTG              |
| M0007 |             | 0.85340 |      |     |                   |                         |
| 6     | V\$GATA2_01 | 6       | 2882 | (-) | NNNGATRNNN        | AAAAATCCTG              |
| M0012 |             | 0.84345 |      |     |                   |                         |
| 7     | V\$GATA1_03 | 9       | 2957 | (+) | RNSNNGATAANNNGN   | AGGAAGATCAGAAA          |
| M0007 |             | 0.78282 |      |     |                   |                         |
| 5     | V\$GATA1_01 | 3       | 2959 | (+) | SNNGATNNNN        | GAAGATCAGA              |
| M0007 |             | 0.79466 |      |     |                   |                         |
| 5     | V\$GATA1_01 | 9       | 2959 | (-) | SNNGATNNNN        | GAAGATCAGA              |
| M0007 |             | 0.80604 |      |     |                   |                         |
| 6     | V\$GATA2_01 | 4       | 2959 | (+) | NNNGATRNNN        | GAAGATCAGA              |
| M0007 |             | 0.82318 |      |     |                   |                         |
| 6     | V\$GATA2_01 | 4       | 2959 | (-) | NNNGATRNNN        | GAAGATCAGA              |
| M0020 |             | 0.83069 |      |     |                   |                         |
| 3     | V\$GATA_C   | 3       | 2961 | (+) | NGATAAGNMNN       | AGATCAGAAAAT            |
| M0007 |             | 0.78484 |      |     |                   |                         |
| 6     | V\$GATA2_01 | 4       | 3020 | (-) | NNNGATRNNN        | CTAAATCCTT              |
| M0016 |             | 0.92460 |      |     |                   |                         |
| 2     | V\$OCT1_06  | 9       | 10   | (-) | CWNAWTKWSATRYN    | TAAATCTCATGACG          |
| M0016 |             | 0.80117 |      |     |                   |                         |
| 2     | V\$OCT1_06  | 2       | 35   | (+) | CWNAWTKWSATRYN    | CACCCTTTAATTAG          |
| M0024 |             | 0.80008 |      |     |                   |                         |
| 8     | V\$OCT1_07  | 5       | 49   | (+) | TNTATGNTAATT      | TCTCTGTTATT             |
| M0013 |             | 0.90991 |      |     |                   |                         |
| 7     | V\$OCT1_03  | 7       | 133  | (+) | NNNRTAATNANNN     | AAGGTAATCACAT           |
| M0013 |             | 0.84749 |      |     |                   |                         |
| 7     | V\$OCT1_03  | 1       | 139  | (-) | NNNRTAATNANNN     | ATCACATTAAC             |
| M0016 |             | 0.84218 |      |     |                   |                         |
| 2     | V\$OCT1_06  | 7       | 141  | (-) | CWNAWTKWSATRYN    | CACATTAACATT            |
| M0013 |             | 0.80656 |      |     | NNNNNNWATGCAATNNN | ATTAACATTCAAAGAGAA-     |
| 8     | V\$OCT1_04  | 6       | 144  | (+) | WNNW              | TAA                     |
| M0013 |             | 0.78695 |      |     |                   |                         |
| 6     | V\$OCT1_02  | 2       | 146  | (+) | NNGAATATKCANNNN   | TAAACATTCAAAGA          |
| M0013 |             | 0.79561 |      |     |                   |                         |
| 6     | V\$OCT1_02  | 5       | 156  | (-) | NNGAATATKCANNNN   | AAAGAGAATAATTCT         |
| M0013 |             | 0.78711 |      |     | NNNNNNWATGCAATNNN |                         |
| 8     | V\$OCT1_04  | 8       | 158  | (+) | WNNW              | AGAGAATAATTCTTATTACAGC  |
| M0013 |             | 0.80373 |      |     |                   |                         |
| 6     | V\$OCT1_02  | 6       | 166  | (+) | NNGAATATKCANNNN   | ATTCTTATTACAGC          |
| M0016 |             | 0.84023 |      |     |                   |                         |
| 2     | V\$OCT1_06  | 4       | 180  | (+) | CWNAWTKWSATRYN    | CAGACTGTAATTAT          |
| M0016 |             | 0.86289 |      |     |                   |                         |
| 2     | V\$OCT1_06  | 1       | 181  | (-) | CWNAWTKWSATRYN    | AGACTGTAATTATT          |
| M0013 |             | 0.87712 |      |     |                   |                         |
| 7     | V\$OCT1_03  | 4       | 183  | (+) | NNNRTAATNANNN     | ACTGTAATTATTA           |
| M0013 |             | 0.88542 |      |     |                   |                         |
| 7     | V\$OCT1_03  | 1       | 184  | (-) | NNNRTAATNANNN     | CTGTAATTATTAC           |
| M0013 |             | 0.90675 |      |     |                   |                         |
| 7     | V\$OCT1_03  | 6       | 187  | (-) | NNNRTAATNANNN     | TAATTATTACACC           |
| M0013 |             | 0.92176 |      |     |                   |                         |
| 6     | V\$OCT1_02  | 5       | 250  | (-) | NNGAATATKCANNNN   | AGCTGAATATCCTT          |
| M0013 |             | 0.80427 |      |     |                   |                         |
| 6     | V\$OCT1_02  | 7       | 253  | (+) | NNGAATATKCANNNN   | TTGAATATCCTTTGT         |
| M0013 |             | 0.78837 |      |     | NNNNNNWATGCAATNNN |                         |
| 8     | V\$OCT1_04  | 3       | 256  | (-) | WNNW              | AATATCCTTTGTCATGATTATGA |
| M0013 |             | 0.94626 |      |     |                   |                         |
| 7     | V\$OCT1_03  | 6       | 267  | (-) | NNNRTAATNANNN     | TCATGATTATGAT           |
| M0016 |             | 0.87580 |      |     |                   |                         |
| 1     | V\$OCT1_05  | 9       | 269  | (+) | MKNATTGTCATAYY    | ATGATTATGATATT          |

|       |            |         |     |     |                     |                         |
|-------|------------|---------|-----|-----|---------------------|-------------------------|
| M0016 |            | 0.84492 |     |     |                     |                         |
| 2     | V\$OCT1_06 | 2       | 269 | (+) | CWNAWTKWSATRYN      | ATGATTATGATATT          |
| M0016 |            | 0.83476 |     |     |                     |                         |
| 2     | V\$OCT1_06 | 6       | 288 | (-) | CWNAWTKWSATRYN      | CTAATCTAAATCTT          |
| M0016 |            | 0.82148 |     |     |                     |                         |
| 2     | V\$OCT1_06 | 4       | 294 | (-) | CWNAWTKWSATRYN      | TAAATCTTAGATTCT         |
| M0016 |            | 0.89843 |     |     |                     |                         |
| 2     | V\$OCT1_06 | 7       | 295 | (+) | CWNAWTKWSATRYN      | AAATCTTAGATTCT          |
| M0013 |            | 0.82245 |     |     | NNNNNNNWATGCAAATNNN |                         |
| 8     | V\$OCT1_04 | 9       | 298 | (-) | WNNW                | TCTTAGATTCTGTATAATGTTAT |
| M0013 |            | 0.88779 |     |     |                     |                         |
| 7     | V\$OCT1_03 | 1       | 308 | (+) | NNNRTAATNANNN       | TGTATAATGTTAT           |
| M0013 |            | 0.81681 |     |     | NNNNNNNWATGCAAATNNN |                         |
| 8     | V\$OCT1_04 | 3       | 311 | (+) | WNNW                | ATAATGTTATGATAAAATTTATT |
| M0013 |            | 0.74265 |     |     |                     |                         |
| 5     | V\$OCT1_01 | 5       | 313 | (+) | NNNNWTATGCAAATNTNNN | AATGTTATGATAAAATTTA     |
| M0016 |            | 0.89414 |     |     |                     |                         |
| 2     | V\$OCT1_06 | 1       | 358 | (+) | CWNAWTKWSATRYN      | CAAGATTTGATACT          |
| M0013 |            | 0.82580 |     |     | NNNNNNNWATGCAAATNNN |                         |
| 8     | V\$OCT1_04 | 5       | 383 | (+) | WNNW                | TGAAGACAATGTAGATTCTTAAA |
| M0019 |            |         |     |     |                     |                         |
| 5     | V\$OCT1_Q6 | 0.7994  | 387 | (+) | NNNNATGCAAATNAN     | GACAATGTAGATTCT         |
| M0024 |            | 0.79796 |     |     |                     |                         |
| 8     | V\$OCT1_07 | 5       | 388 | (+) | TNTATGNTAATT        | ACAATGTAGATT            |
| M0013 |            | 0.80133 |     |     | NNNNNNNWATGCAAATNNN | CAATGTAGAT-             |
| 8     | V\$OCT1_04 | 8       | 389 | (+) | WNNW                | TCTTAAAAAAAAA           |
| M0013 |            | 0.78460 |     |     | NNNNNNNWATGCAAATNNN | TGTAGAT-                |
| 8     | V\$OCT1_04 | 9       | 392 | (+) | WNNW                | TCTTAAAAAAAAAAAAA       |
| M0013 |            | 0.85144 |     |     |                     |                         |
| 7     | V\$OCT1_03 | 2       | 465 | (-) | NNNRTAATNANNN       | AACTTTTAGGAA            |
| M0013 |            | 0.78911 |     |     |                     |                         |
| 6     | V\$OCT1_02 | 7       | 485 | (-) | NNGAATATKCANNNN     | GTACAGCATAATCCA         |
| M0016 |            | 0.80078 |     |     |                     |                         |
| 2     | V\$OCT1_06 | 1       | 491 | (-) | CWNAWTKWSATRYN      | CATAATCCAGATTG          |
| M0016 |            | 0.86054 |     |     |                     |                         |
| 2     | V\$OCT1_06 | 7       | 509 | (+) | CWNAWTKWSATRYN      | CTTAATTAATTTCA          |
| M0013 |            | 0.78063 |     |     | NNNNNNNWATGCAAATNNN |                         |
| 8     | V\$OCT1_04 | 6       | 510 | (+) | WNNW                | TTAATTAATTTCAAAATTTTATT |
| M0013 |            | 0.79506 |     |     | NNNNNNNWATGCAAATNNN |                         |
| 8     | V\$OCT1_04 | 5       | 510 | (-) | WNNW                | TTAATTAATTTCAAAATTTTATT |
| M0016 |            | 0.82148 |     |     |                     |                         |
| 2     | V\$OCT1_06 | 4       | 514 | (-) | CWNAWTKWSATRYN      | TTAATTTCAAAATT          |
| M0016 |            | 0.85234 |     |     |                     |                         |
| 2     | V\$OCT1_06 | 4       | 516 | (-) | CWNAWTKWSATRYN      | AATTTCAAAATTTT          |
| M0024 |            | 0.79118 |     |     |                     |                         |
| 8     | V\$OCT1_07 | 1       | 516 | (-) | TNTATGNTAATT        | AATTTCAAAATT            |
| M0016 |            | 0.88164 |     |     |                     |                         |
| 2     | V\$OCT1_06 | 1       | 521 | (+) | CWNAWTKWSATRYN      | CAAAATTTTATTTCT         |
| M0016 |            | 0.82656 |     |     |                     |                         |
| 2     | V\$OCT1_06 | 2       | 522 | (+) | CWNAWTKWSATRYN      | AAAATTTTATTTCT          |
| M0016 |            | 0.83476 |     |     |                     |                         |
| 2     | V\$OCT1_06 | 6       | 522 | (-) | CWNAWTKWSATRYN      | AAAATTTTATTTCT          |
| M0013 |            | 0.86250 |     |     |                     |                         |
| 7     | V\$OCT1_03 | 5       | 544 | (+) | NNNRTAATNANNN       | GTTATAATTTTCAT          |
| M0016 |            | 0.87617 |     |     |                     |                         |
| 2     | V\$OCT1_06 | 2       | 546 | (+) | CWNAWTKWSATRYN      | TATAATTTTCATTG          |
| M0013 |            | 0.75047 |     |     |                     |                         |
| 5     | V\$OCT1_01 | 7       | 561 | (+) | NNNNWTATGCAAATNTNNN | CATAGTATACAACCTTTAAA    |
| M0013 |            | 0.81576 |     |     | NNNNNNNWATGCAAATNNN | GTATACAACCTTTAAAAA-     |
| 8     | V\$OCT1_04 | 7       | 565 | (+) | WNNW                | TAACA                   |
| M0016 |            | 0.80078 |     |     |                     |                         |
| 2     | V\$OCT1_06 | 1       | 579 | (-) | CWNAWTKWSATRYN      | AAAATAACAGGACT          |
| M0013 |            | 0.79046 |     |     | NNNNNNNWATGCAAATNNN |                         |
| 8     | V\$OCT1_04 | 4       | 603 | (-) | WNNW                | TCATGAAAGCTGAATAGTTCTGT |
| M0013 |            | 0.81618 |     |     |                     |                         |
| 6     | V\$OCT1_02 | 8       | 609 | (-) | NNGAATATKCANNNN     | AAGCTGAATAGTTCT         |

|       |            |         |     |     |                      |                         |
|-------|------------|---------|-----|-----|----------------------|-------------------------|
| M0016 |            | 0.82617 |     |     |                      |                         |
| 2     | V\$OCT1_06 | 2       | 623 | (-) | CWNAWTKWSATRYN       | TGTTTCACAAATTT          |
| M0013 |            | 0.83772 |     |     | NNNNNNNNWATGCAAATNNN | AG-                     |
| 8     | V\$OCT1_04 | 5       | 650 | (+) | WNNW                 | TTATGAAGGCAAATTCAAGTA   |
| M0013 |            | 0.77069 |     |     |                      |                         |
| 5     | V\$OCT1_01 | 8       | 652 | (+) | NNNNWTATGCAAATNTNNN  | TTATGAAGGCAAATTCAAG     |
| M0019 |            | 0.82068 |     |     |                      |                         |
| 5     | V\$OCT1_Q6 | 8       | 654 | (+) | NNNNATGCAAATNAN      | ATGAAGGCAAATTCA         |
| M0013 |            | 0.77612 |     |     |                      |                         |
| 6     | V\$OCT1_02 | 3       | 655 | (-) | NNGAATATKCANNNN      | TGAAGGCAAATTCAA         |
| M0024 |            | 0.82404 |     |     |                      |                         |
| 8     | V\$OCT1_07 | 1       | 655 | (+) | TNTATGNTAATT         | TGAAGGCAAATT            |
| M0013 |            | 0.80552 |     |     | NNNNNNNNWATGCAAATNNN |                         |
| 8     | V\$OCT1_04 | 1       | 656 | (+) | WNNW                 | GAAGGCAAATTCAAGTACTTACT |
| M0013 |            | 0.85544 |     |     |                      |                         |
| 6     | V\$OCT1_02 | 1       | 658 | (+) | NNGAATATKCANNNN      | AGGCAAATTCAAGTA         |
| M0016 |            | 0.85742 |     |     |                      |                         |
| 2     | V\$OCT1_06 | 2       | 661 | (-) | CWNAWTKWSATRYN       | CAAATTCAAGTACT          |
| M0013 |            | 0.78147 |     |     | NNNNNNNNWATGCAAATNNN |                         |
| 8     | V\$OCT1_04 | 2       | 712 | (+) | WNNW                 | TCTGGTTTCTGTTTATGCTAAAA |
| M0013 |            | 0.88739 |     |     |                      |                         |
| 7     | V\$OCT1_03 | 6       | 718 | (-) | NNNRTAATNANNN        | TTCTGTTTATGCT           |
| M0013 |            | 0.82371 |     |     | NNNNNNNNWATGCAAATNNN |                         |
| 8     | V\$OCT1_04 | 4       | 718 | (+) | WNNW                 | TTCTGTTTATGCTAAAAAGAGAA |
| M0013 |            | 0.84147 |     |     |                      |                         |
| 5     | V\$OCT1_01 | 3       | 720 | (+) | NNNNWTATGCAAATNTNNN  | CTGTTTATGCTAAAAAGAG     |
| M0013 |            | 0.77910 |     |     |                      |                         |
| 6     | V\$OCT1_02 | 1       | 720 | (+) | NNGAATATKCANNNN      | CTGTTTATGCTAAAA         |
| M0019 |            | 0.80322 |     |     |                      |                         |
| 5     | V\$OCT1_Q6 | 1       | 722 | (+) | NNNNATGCAAATNAN      | GTTTATGCTAAAAAG         |
| M0024 |            | 0.79923 |     |     |                      |                         |
| 8     | V\$OCT1_07 | 7       | 723 | (+) | TNTATGNTAATT         | TTTATGCTAAAA            |
| M0016 |            | 0.82656 |     |     |                      |                         |
| 2     | V\$OCT1_06 | 2       | 751 | (-) | CWNAWTKWSATRYN       | CATTTTACAAGATG          |
| M0013 |            | 0.81451 |     |     | NNNNNNNNWATGCAAATNNN |                         |
| 8     | V\$OCT1_04 | 3       | 759 | (-) | WNNW                 | AAGATGTTTTTGTATGAGTGTTT |
| M0016 |            | 0.88281 |     |     |                      |                         |
| 2     | V\$OCT1_06 | 2       | 776 | (+) | CWNAWTKWSATRYN       | GTGTTTGTGATATC          |
| M0013 |            | 0.81974 |     |     | NNNNNNNNWATGCAAATNNN |                         |
| 8     | V\$OCT1_04 | 1       | 784 | (-) | WNNW                 | GATATCATTTTGCATGAATTATA |
| M0013 |            |         |     |     |                      |                         |
| 5     | V\$OCT1_01 | 0.78348 | 786 | (-) | NNNNWTATGCAAATNTNNN  | TATCATTTTGCATGAATTA     |
| M0024 |            | 0.81916 |     |     |                      |                         |
| 8     | V\$OCT1_07 | 5       | 790 | (-) | TNTATGNTAATT         | ATTTTGCATGAA            |
| M0013 |            |         |     |     |                      |                         |
| 6     | V\$OCT1_02 | 0.78614 | 794 | (-) | NNGAATATKCANNNN      | TGCATGAATTATAAA         |
| M0013 |            | 0.75238 |     |     |                      |                         |
| 5     | V\$OCT1_01 | 5       | 798 | (+) | NNNNWTATGCAAATNTNNN  | TGAATTATAAAAAATTCCA     |
| M0013 |            | 0.74074 |     |     |                      |                         |
| 5     | V\$OCT1_01 | 8       | 805 | (-) | NNNNWTATGCAAATNTNNN  | TAAAAAATTCCATGATTCA     |
| M0016 |            | 0.81992 |     |     |                      |                         |
| 2     | V\$OCT1_06 | 2       | 807 | (+) | CWNAWTKWSATRYN       | AAAAATTCCATGAT          |
| M0016 |            | 0.88554 |     |     |                      |                         |
| 2     | V\$OCT1_06 | 7       | 808 | (-) | CWNAWTKWSATRYN       | AAAATTCCATGATT          |
| M0024 |            | 0.79584 |     |     |                      |                         |
| 8     | V\$OCT1_07 | 5       | 809 | (-) | TNTATGNTAATT         | AAATTCCATGAT            |
| M0013 |            |         |     |     | NNNNNNNNWATGCAAATNNN |                         |
| 8     | V\$OCT1_04 | 0.80573 | 813 | (-) | WNNW                 | TCCATGATTACCATAGAAATAT  |
| M0024 |            | 0.80008 |     |     |                      |                         |
| 8     | V\$OCT1_07 | 5       | 819 | (-) | TNTATGNTAATT         | ATTCACCATAGA            |
| M0016 |            | 0.84218 |     |     |                      |                         |
| 2     | V\$OCT1_06 | 7       | 847 | (+) | CWNAWTKWSATRYN       | CAATCTTAAAAAGTT         |
| M0013 |            | 0.81848 |     |     | NNNNNNNNWATGCAAATNNN |                         |
| 8     | V\$OCT1_04 | 6       | 858 | (+) | WNNW                 | GTTAGCCAATGCTTATTGTACAA |
| M0024 |            | 0.80326 |     |     |                      |                         |
| 8     | V\$OCT1_07 | 5       | 863 | (+) | TNTATGNTAATT         | CCAATGCTTATT            |

|       |            |         |      |     |                     |                         |
|-------|------------|---------|------|-----|---------------------|-------------------------|
| M0013 |            | 0.81591 |      |     |                     |                         |
| 6     | V\$OCT1_02 | 8       | 887  | (+) | NNGAATATKCANNNN     | TTCTATATTCACTGT         |
| M0016 |            | 0.80039 |      |     |                     |                         |
| 2     | V\$OCT1_06 | 1       | 890  | (-) | CWNAWTKWSATRYN      | TATATTCACTGTAC          |
| M0024 |            | 0.83930 |      |     |                     |                         |
| 8     | V\$OCT1_07 | 5       | 904  | (+) | TNTATGNTAATT        | TGTATTGTAATC            |
| M0013 |            | 0.88739 |      |     |                     |                         |
| 7     | V\$OCT1_03 | 6       | 907  | (+) | NNNRTAATNANNN       | ATTGTAATCATCA           |
| M0013 |            | 0.85104 |      |     |                     |                         |
| 7     | V\$OCT1_03 | 7       | 920  | (+) | NNNRTAATNANNN       | AGCTTAATAAGAG           |
| M0016 |            | 0.80937 |      |     |                     |                         |
| 2     | V\$OCT1_06 | 5       | 922  | (+) | CWNAWTKWSATRYN      | CTTAATAAGAGACT          |
| M0013 |            | 0.80719 |      |     | NNNNNNNWATGCAAATNNN |                         |
| 8     | V\$OCT1_04 | 4       | 931  | (-) | WNNW                | AGACTAGATATTAATTATTCCAA |
| M0024 |            | 0.79626 |      |     |                     |                         |
| 8     | V\$OCT1_07 | 9       | 935  | (+) | TNTATGNTAATT        | TAGATATTAATT            |
| M0016 |            | 0.80820 |      |     |                     |                         |
| 2     | V\$OCT1_06 | 3       | 936  | (+) | CWNAWTKWSATRYN      | AGATATTAATTATT          |
| M0016 |            | 0.80820 |      |     |                     |                         |
| 2     | V\$OCT1_06 | 3       | 937  | (-) | CWNAWTKWSATRYN      | GATATTAATTATTC          |
| M0013 |            | 0.87949 |      |     |                     |                         |
| 7     | V\$OCT1_03 | 4       | 939  | (-) | NNNRTAATNANNN       | TATTAATTATTCC           |
| M0013 |            | 0.78063 |      |     | NNNNNNNWATGCAAATNNN |                         |
| 8     | V\$OCT1_04 | 6       | 939  | (+) | WNNW                | TATTAATTATTCCAACCACAAAA |
| M0013 |            | 0.84483 |      |     | NNNNNNNWATGCAAATNNN | AAAAAGAAATGA-           |
| 8     | V\$OCT1_04 | 5       | 959  | (+) | WNNW                | TAATTATGTGA             |
| M0019 |            | 0.83733 |      |     |                     |                         |
| 5     | V\$OCT1_Q6 | 6       | 963  | (+) | NNNNATGCAAATNAN     | AGAAATGATAATTAT         |
| M0016 |            | 0.92196 |      |     |                     |                         |
| 1     | V\$OCT1_05 | 6       | 964  | (-) | MKNATTGTCATAYY      | GAAATGATAATTAT          |
| M0016 |            | 0.83984 |      |     |                     |                         |
| 2     | V\$OCT1_06 | 4       | 964  | (-) | CWNAWTKWSATRYN      | GAAATGATAATTAT          |
| M0024 |            | 0.82955 |      |     |                     |                         |
| 8     | V\$OCT1_07 | 3       | 964  | (+) | TNTATGNTAATT        | GAAATGATAATT            |
| M0013 |            | 0.92848 |      |     |                     |                         |
| 7     | V\$OCT1_03 | 7       | 967  | (+) | NNNRTAATNANNN       | ATGATAATTATGT           |
| M0013 |            | 0.88818 |      |     |                     |                         |
| 7     | V\$OCT1_03 | 6       | 968  | (-) | NNNRTAATNANNN       | TGATAATTATGTG           |
| M0016 |            | 0.82109 |      |     |                     |                         |
| 2     | V\$OCT1_06 | 4       | 972  | (+) | CWNAWTKWSATRYN      | AATTATGTGACATG          |
| M0016 |            | 0.89335 |      |     |                     |                         |
| 2     | V\$OCT1_06 | 9       | 980  | (-) | CWNAWTKWSATRYN      | GACATGACAGAGTT          |
| M0013 |            | 0.82204 |      |     | NNNNNNNWATGCAAATNNN |                         |
| 8     | V\$OCT1_04 | 1       | 992  | (-) | WNNW                | TTGTTAATTATCAATACAATTGC |
| M0013 |            | 0.87159 |      |     |                     |                         |
| 7     | V\$OCT1_03 | 2       | 993  | (-) | NNNRTAATNANNN       | TGTTAATTATCAA           |
| M0013 |            | 0.84907 |      |     |                     |                         |
| 7     | V\$OCT1_03 | 2       | 1010 | (+) | NNNRTAATNANNN       | ATTGCAATCAAAT           |
| M0016 |            | 0.82656 |      |     |                     |                         |
| 2     | V\$OCT1_06 | 2       | 1012 | (-) | CWNAWTKWSATRYN      | TGCAATCAAATTAT          |
| M0016 |            | 0.87382 |      |     |                     |                         |
| 2     | V\$OCT1_06 | 8       | 1013 | (-) | CWNAWTKWSATRYN      | GCAATCAAATTATG          |
| M0013 |            | 0.88976 |      |     |                     |                         |
| 7     | V\$OCT1_03 | 7       | 1016 | (-) | NNNRTAATNANNN       | ATCAAATTATGAT           |
| M0016 |            | 0.89960 |      |     |                     |                         |
| 2     | V\$OCT1_06 | 9       | 1018 | (+) | CWNAWTKWSATRYN      | CAAATTATGATGCA          |
| M0016 |            | 0.83437 |      |     |                     |                         |
| 2     | V\$OCT1_06 | 5       | 1035 | (+) | CWNAWTKWSATRYN      | ATACATTAAATAAA          |
| M0016 |            | 0.91132 |      |     |                     |                         |
| 2     | V\$OCT1_06 | 8       | 1036 | (-) | CWNAWTKWSATRYN      | TACATTAAATAAAC          |
| M0013 |            | 0.81325 |      |     | NNNNNNNWATGCAAATNNN | ACATTAAATAAACATGTTAGA-  |
| 8     | V\$OCT1_04 | 8       | 1037 | (-) | WNNW                | CA                      |
| M0013 |            | 0.86250 |      |     |                     |                         |
| 7     | V\$OCT1_03 | 5       | 1041 | (+) | NNNRTAATNANNN       | TAAATAAACATGT           |
| M0024 |            | 0.81704 |      |     |                     |                         |
| 8     | V\$OCT1_07 | 5       | 1043 | (-) | TNTATGNTAATT        | AATAAACATGTT            |

|       |            |         |      |     |                      |                          |
|-------|------------|---------|------|-----|----------------------|--------------------------|
| M0016 |            | 0.82929 |      |     |                      |                          |
| 2     | V\$OCT1_06 | 7       | 1047 | (-) | CWNAWTKWSATRYN       | AACATGTTAGACAC           |
| M0016 |            | 0.92460 |      |     |                      |                          |
| 2     | V\$OCT1_06 | 9       | 1058 | (-) | CWNAWTKWSATRYN       | CACATTAAATTAAC           |
| M0013 |            | 0.81618 |      |     | NNNNNNNWWATGCAAATNNN |                          |
| 8     | V\$OCT1_04 | 6       | 1059 | (-) | WNNW                 | ACATTAAATTAACACAATGTTAT  |
| M0013 |            | 0.78481 |      |     |                      |                          |
| 5     | V\$OCT1_01 | 5       | 1061 | (-) | NNNNWTATGCAAATNTNNN  | ATTAAATTAACACAATGTT      |
| M0024 |            | 0.87110 |      |     |                      |                          |
| 8     | V\$OCT1_07 | 5       | 1065 | (-) | TNTATGNTAATT         | AATTAACACAAT             |
| M0016 |            | 0.89453 |      |     |                      |                          |
| 2     | V\$OCT1_06 | 1       | 1071 | (+) | CWNAWTKWSATRYN       | CACAATGTTATATA           |
| M0016 |            | 0.81210 |      |     |                      |                          |
| 2     | V\$OCT1_06 | 9       | 1073 | (+) | CWNAWTKWSATRYN       | CAATGTTATATATT           |
| M0024 |            | 0.79351 |      |     |                      |                          |
| 8     | V\$OCT1_07 | 3       | 1079 | (+) | TNTATGNTAATT         | TATATATTAAAT             |
| M0016 |            | 0.84218 |      |     |                      |                          |
| 2     | V\$OCT1_06 | 7       | 1080 | (+) | CWNAWTKWSATRYN       | ATATATTAAATCTA           |
| M0016 |            | 0.84726 |      |     |                      |                          |
| 2     | V\$OCT1_06 | 6       | 1081 | (-) | CWNAWTKWSATRYN       | TATATTAAATCTAT           |
| M0013 |            | 0.85302 |      |     |                      |                          |
| 7     | V\$OCT1_03 | 3       | 1130 | (+) | NNNRATAATNANNN       | TTCATAAGGAGCT            |
| M0016 |            | 0.84257 |      |     |                      |                          |
| 2     | V\$OCT1_06 | 8       | 1151 | (+) | CWNAWTKWSATRYN       | TTCAATGAAATTTG           |
| M0013 |            | 0.82685 |      |     | NNNNNNNWWATGCAAATNNN |                          |
| 8     | V\$OCT1_04 | 1       | 1188 | (-) | WNNW                 | TGCTCAAATTTGAACTCACATTA  |
| M0016 |            | 0.83984 |      |     |                      |                          |
| 2     | V\$OCT1_06 | 4       | 1192 | (+) | CWNAWTKWSATRYN       | CAAATTTGAACTCA           |
| M0016 |            | 0.85273 |      |     |                      |                          |
| 2     | V\$OCT1_06 | 4       | 1199 | (-) | CWNAWTKWSATRYN       | GAACTCACATTAAG           |
| M0016 |            | 0.82929 |      |     |                      |                          |
| 2     | V\$OCT1_06 | 7       | 1204 | (-) | CWNAWTKWSATRYN       | CACATTAAAGTTCTT          |
| M0016 |            | 0.83945 |      |     |                      |                          |
| 2     | V\$OCT1_06 | 3       | 1221 | (+) | CWNAWTKWSATRYN       | CATTCAGTGATATT           |
| M0013 |            |         |      |     |                      |                          |
| 6     | V\$OCT1_02 | 0.82079 | 1226 | (+) | NNGAATATKCANNNN      | AGTGATATTCCATCA          |
| M0013 |            | 0.78000 |      |     | NNNNNNNWWATGCAAATNNN |                          |
| 8     | V\$OCT1_04 | 8       | 1280 | (+) | WNNW                 | ATTCTTACCTGGAAATCAAAATT  |
| M0016 |            | 0.80078 |      |     |                      |                          |
| 2     | V\$OCT1_06 | 1       | 1290 | (-) | CWNAWTKWSATRYN       | GGAAATCAAAATTG           |
| M0013 |            | 0.84393 |      |     |                      |                          |
| 7     | V\$OCT1_03 | 5       | 1320 | (-) | NNNRATAATNANNN       | CGCTCTTTATCAA            |
| M0016 |            | 0.81210 |      |     |                      |                          |
| 2     | V\$OCT1_06 | 9       | 1338 | (-) | CWNAWTKWSATRYN       | AACTTCTAACTCTG           |
| M0016 |            | 0.86054 |      |     |                      |                          |
| 2     | V\$OCT1_06 | 7       | 1365 | (-) | CWNAWTKWSATRYN       | TAAAACTCAGTTTG           |
| M0013 |            | 0.73197 |      |     |                      |                          |
| 5     | V\$OCT1_01 | 3       | 1370 | (+) | NNNNWTATGCAAATNTNNN  | CTCAGTTTGCAGGTTTCAA      |
| M0013 |            |         |      |     | NNNNNNNWWATGCAAATNNN |                          |
| 8     | V\$OCT1_04 | 0.7844  | 1388 | (-) | WNNW                 | AGTCTATACAAGCATGA-TAACAA |
| M0013 |            | 0.80468 |      |     | NNNNNNNWWATGCAAATNNN | TGATAACAATGGCTATAACAA-GA |
| 8     | V\$OCT1_04 | 4       | 1402 | (+) | WNNW                 |                          |
| M0016 |            | 0.82929 |      |     |                      |                          |
| 2     | V\$OCT1_06 | 7       | 1427 | (+) | CWNAWTKWSATRYN       | TAGTATTTAATTTA           |
| M0016 |            |         |      |     |                      |                          |
| 2     | V\$OCT1_06 | 0.9375  | 1428 | (-) | CWNAWTKWSATRYN       | AGTATTTAATTTAT           |
| M0024 |            | 0.79330 |      |     |                      |                          |
| 8     | V\$OCT1_07 | 1       | 1428 | (+) | TNTATGNTAATT         | AGTATTTAATTT             |
| M0016 |            | 0.82890 |      |     |                      |                          |
| 2     | V\$OCT1_06 | 6       | 1435 | (+) | CWNAWTKWSATRYN       | AATTATAAATGCA            |
| M0013 |            | 0.83814 |      |     | NNNNNNNWWATGCAAATNNN |                          |
| 8     | V\$OCT1_04 | 3       | 1436 | (+) | WNNW                 | ATTATAAATGCAAGATTTATTA   |
| M0013 |            | 0.77260 |      |     |                      |                          |
| 5     | V\$OCT1_01 | 6       | 1438 | (+) | NNNNWTATGCAAATNTNNN  | TTATAAATGCAAGATTTAT      |
| M0016 |            | 0.88554 |      |     |                      |                          |
| 2     | V\$OCT1_06 | 7       | 1441 | (-) | CWNAWTKWSATRYN       | TAAATGCAAGATTT           |

|       |            |         |      |     |                     |                          |
|-------|------------|---------|------|-----|---------------------|--------------------------|
| M0013 |            | 0.84734 |      |     | NNNNNNNWATGCAAATNNN |                          |
| 8     | V\$OCT1_04 | 4       | 1447 | (+) | WNNW                | CAAGATTTATTAATATTTTAAAA  |
| M0013 |            | 0.80698 |      |     | NNNNNNNWATGCAAATNNN |                          |
| 8     | V\$OCT1_04 | 5       | 1448 | (-) | WNNW                | AAGATTTATTAATATTTTAAAAA  |
| M0016 |            | 0.81328 |      |     |                     |                          |
| 2     | V\$OCT1_06 | 1       | 1450 | (+) | CWNAWTKWSATRYN      | GATTTATTAATATT           |
| M0013 |            | 0.80677 |      |     | NNNNNNNWATGCAAATNNN |                          |
| 8     | V\$OCT1_04 | 5       | 1453 | (+) | WNNW                | TTATTAATATTTTAAAAATCTAA  |
| M0013 |            | 0.80196 |      |     | NNNNNNNWATGCAAATNNN |                          |
| 8     | V\$OCT1_04 | 6       | 1454 | (-) | WNNW                | TATTAATATTTTAAAAATCTAAA  |
| M0013 |            | 0.79344 |      |     |                     |                          |
| 6     | V\$OCT1_02 | 9       | 1455 | (+) | NNGAATATKCANNNN     | ATTAATATTTTAAAA          |
| M0016 |            | 0.82656 |      |     |                     |                          |
| 2     | V\$OCT1_06 | 2       | 1458 | (-) | CWNAWTKWSATRYN      | AATATTTTAAAAAT           |
| M0016 |            | 0.80039 |      |     |                     |                          |
| 2     | V\$OCT1_06 | 1       | 1459 | (+) | CWNAWTKWSATRYN      | ATATTTTAAAAATC           |
| M0013 |            | 0.80217 |      |     | NNNNNNNWATGCAAATNNN |                          |
| 8     | V\$OCT1_04 | 5       | 1462 | (+) | WNNW                | TTTTAAAAATCTAAATGTTATA   |
| M0016 |            | 0.83437 |      |     |                     |                          |
| 2     | V\$OCT1_06 | 5       | 1467 | (-) | CWNAWTKWSATRYN      | AAAATCTAAAATGT           |
| M0016 |            | 0.82929 |      |     |                     |                          |
| 2     | V\$OCT1_06 | 7       | 1468 | (+) | CWNAWTKWSATRYN      | AAATCTAAAATGTT           |
| M0013 |            | 0.78168 |      |     | NNNNNNNWATGCAAATNNN |                          |
| 8     | V\$OCT1_04 | 1       | 1471 | (-) | WNNW                | TCTAAAATGTTATATGATCTTTC  |
| M0016 |            | 0.81210 |      |     |                     |                          |
| 2     | V\$OCT1_06 | 9       | 1473 | (+) | CWNAWTKWSATRYN      | TAAAATGTTATATG           |
| M0013 |            | 0.80656 |      |     | NNNNNNNWATGCAAATNNN |                          |
| 8     | V\$OCT1_04 | 6       | 1504 | (+) | WNNW                | ATTTAGCTTTTCAAATCAAATAA  |
| M0016 |            | 0.89062 |      |     |                     |                          |
| 2     | V\$OCT1_06 | 5       | 1515 | (-) | CWNAWTKWSATRYN      | CAAATCAAATAAAT           |
| M0013 |            | 0.86606 |      |     |                     |                          |
| 7     | V\$OCT1_03 | 1       | 1520 | (+) | NNNRTAATNANNN       | CAAATAAATAGGT            |
| M0013 |            | 0.79025 |      |     | NNNNNNNWATGCAAATNNN |                          |
| 8     | V\$OCT1_04 | 5       | 1559 | (+) | WNNW                | GAAAGATAAGGTTAATTTATTTTC |
| M0024 |            | 0.81704 |      |     |                     |                          |
| 8     | V\$OCT1_07 | 5       | 1564 | (+) | TNTATGNTAATT        | ATAAGGTTAATT             |
| M0016 |            | 0.82656 |      |     |                     |                          |
| 2     | V\$OCT1_06 | 2       | 1569 | (+) | CWNAWTKWSATRYN      | GTAAATTTATTCT            |
| M0013 |            | 0.83918 |      |     | NNNNNNNWATGCAAATNNN |                          |
| 8     | V\$OCT1_04 | 9       | 1573 | (+) | WNNW                | ATTTATTTCTTCAAATATTTTCAT |
| M0013 |            | 0.75925 |      |     |                     |                          |
| 5     | V\$OCT1_01 | 2       | 1575 | (+) | NNNNWTATGCAAATNTNNN | TTATTTCTTCAAATATTTTC     |
| M0016 |            | 0.86289 |      |     |                     |                          |
| 2     | V\$OCT1_06 | 1       | 1585 | (+) | CWNAWTKWSATRYN      | AAATATTTTCATCCA          |
| M0016 |            | 0.86835 |      |     |                     |                          |
| 2     | V\$OCT1_06 | 9       | 1586 | (-) | CWNAWTKWSATRYN      | AATATTTTCATCCAG          |
| M0016 |            | 0.82695 |      |     |                     |                          |
| 2     | V\$OCT1_06 | 3       | 1600 | (+) | CWNAWTKWSATRYN      | AAACTGTAATTGT            |
| M0016 |            |         |      |     |                     |                          |
| 2     | V\$OCT1_06 | 0.85    | 1601 | (-) | CWNAWTKWSATRYN      | AAACTGTAATTGTC           |
| M0013 |            | 0.75181 |      |     |                     |                          |
| 5     | V\$OCT1_01 | 2       | 1604 | (-) | NNNNWTATGCAAATNTNNN | CTGTAATTGTCATATCTTA      |
| M0016 |            | 0.87398 |      |     |                     |                          |
| 1     | V\$OCT1_05 | 3       | 1606 | (+) | MKNATTTGCATAYY      | GTAATTGTCATATC           |
| M0016 |            | 0.92968 |      |     |                     |                          |
| 2     | V\$OCT1_06 | 8       | 1606 | (+) | CWNAWTKWSATRYN      | GTAATTGTCATATC           |
| M0019 |            | 0.85835 |      |     |                     |                          |
| 5     | V\$OCT1_Q6 | 2       | 1606 | (-) | NNNNATGCAAATNAN     | GTAATTGTCATATCT          |
| M0016 |            | 0.81601 |      |     |                     |                          |
| 2     | V\$OCT1_06 | 6       | 1607 | (-) | CWNAWTKWSATRYN      | TAATTGTCATATCT           |
| M0024 |            | 0.79139 |      |     |                     |                          |
| 8     | V\$OCT1_07 | 3       | 1608 | (-) | TNTATGNTAATT        | AATTGTCATATC             |
| M0013 |            | 0.80656 |      |     | NNNNNNNWATGCAAATNNN |                          |
| 8     | V\$OCT1_04 | 6       | 1611 | (-) | WNNW                | TGTCATATCTTACATTTTTTCAT  |
| M0016 |            | 0.89843 |      |     |                     |                          |
| 2     | V\$OCT1_06 | 7       | 1615 | (+) | CWNAWTKWSATRYN      | ATATCTTACATTTT           |

|       |            |         |      |     |                      |                          |
|-------|------------|---------|------|-----|----------------------|--------------------------|
| M0016 |            | 0.84726 |      |     |                      |                          |
| 2     | V\$OCT1_06 | 6       | 1616 | (-) | CWNAWTKWSATRYN       | TATCTTACATTTTT           |
| M0013 |            | 0.81242 |      |     | NNNNNNNNWATGCAAATNNN |                          |
| 8     | V\$OCT1_04 | 2       | 1619 | (-) | WNNW                 | CTTACATTTTTTTCATTAAATTGA |
| M0016 |            | 0.86054 |      |     |                      |                          |
| 2     | V\$OCT1_06 | 7       | 1623 | (+) | CWNAWTKWSATRYN       | CATTTTTTCATTAA           |
| M0016 |            | 0.84765 |      |     |                      |                          |
| 2     | V\$OCT1_06 | 6       | 1629 | (-) | CWNAWTKWSATRYN       | TTCATTAAATTGAT           |
| M0013 |            | 0.79715 |      |     | NNNNNNNNWATGCAAATNNN |                          |
| 8     | V\$OCT1_04 | 6       | 1636 | (+) | WNNW                 | AATTGATCAAGCTAATTATATAA  |
| M0013 |            | 0.75238 |      |     |                      |                          |
| 5     | V\$OCT1_01 | 5       | 1638 | (+) | NNNNWTATGCAAATNTNNN  | TTGATCAAGCTAATTATAT      |
| M0016 |            | 0.86020 |      |     |                      |                          |
| 1     | V\$OCT1_05 | 3       | 1641 | (-) | MKNATTTGCATAYY       | ATCAAGCTAATTAT           |
| M0024 |            | 0.82382 |      |     |                      |                          |
| 8     | V\$OCT1_07 | 9       | 1641 | (+) | TNTATGNTAATT         | ATCAAGCTAATT             |
| M0013 |            | 0.86527 |      |     |                      |                          |
| 7     | V\$OCT1_03 | 1       | 1644 | (+) | NNNRATAATNANNN       | AAGCTAATTATAT            |
| M0013 |            | 0.87909 |      |     |                      |                          |
| 7     | V\$OCT1_03 | 9       | 1645 | (-) | NNNRATAATNANNN       | AGCTAATTATATA            |
| M0013 |            | 0.91189 |      |     |                      |                          |
| 7     | V\$OCT1_03 | 3       | 1660 | (-) | NNNRATAATNANNN       | TTATGATTACTGG            |
| M0013 |            | 0.87514 |      |     |                      |                          |
| 7     | V\$OCT1_03 | 8       | 1676 | (-) | NNNRATAATNANNN       | AGCAGATTATGAA            |
| M0013 |            | 0.80122 |      |     |                      |                          |
| 5     | V\$OCT1_01 | 1       | 1678 | (+) | NNNNWTATGCAAATNTNNN  | CAGATTATGAAAAATGCAG      |
| M0013 |            | 0.77422 |      |     |                      |                          |
| 6     | V\$OCT1_02 | 8       | 1678 | (+) | NNGAATATKCANNNN      | CAGATTATGAAAAAT          |
| M0016 |            | 0.81601 |      |     |                      |                          |
| 2     | V\$OCT1_06 | 6       | 1680 | (+) | CWNAWTKWSATRYN       | GATTATGAAAAATG           |
| M0013 |            | 0.79561 |      |     |                      |                          |
| 6     | V\$OCT1_02 | 5       | 1685 | (+) | NNGAATATKCANNNN      | TGAAAAATGCAGTTT          |
| M0013 |            | 0.77016 |      |     |                      |                          |
| 6     | V\$OCT1_02 | 8       | 1688 | (-) | NNGAATATKCANNNN      | AAAATGCAGTTTCAG          |
| M0013 |            | 0.84907 |      |     |                      |                          |
| 7     | V\$OCT1_03 | 2       | 1716 | (-) | NNNRATAATNANNN       | ATCTCTTTAAGTA            |
| M0013 |            | 0.77666 |      |     |                      |                          |
| 6     | V\$OCT1_02 | 5       | 1719 | (-) | NNGAATATKCANNNN      | TCTTTAAGTATTCCT          |
| M0013 |            | 0.78460 |      |     | NNNNNNNNWATGCAAATNNN |                          |
| 8     | V\$OCT1_04 | 9       | 1719 | (-) | WNNW                 | TCTTTAAGTATTCCTACTAGATC  |
| M0016 |            | 0.81367 |      |     |                      |                          |
| 2     | V\$OCT1_06 | 2       | 1740 | (-) | CWNAWTKWSATRYN       | TCAATCACAGAATT           |
| M0016 |            | 0.80429 |      |     |                      |                          |
| 2     | V\$OCT1_06 | 7       | 1747 | (+) | CWNAWTKWSATRYN       | CAGAATTAGAGAAT           |
| M0016 |            | 0.80078 |      |     |                      |                          |
| 2     | V\$OCT1_06 | 1       | 1748 | (-) | CWNAWTKWSATRYN       | AGAATTAGAGAATT           |
| M0016 |            | 0.85507 |      |     |                      |                          |
| 2     | V\$OCT1_06 | 8       | 1755 | (+) | CWNAWTKWSATRYN       | GAGAATTCAGACA            |
| M0016 |            | 0.86484 |      |     |                      |                          |
| 2     | V\$OCT1_06 | 4       | 1756 | (-) | CWNAWTKWSATRYN       | AGAATTCAGACAT            |
| M0016 |            | 0.84257 |      |     |                      |                          |
| 2     | V\$OCT1_06 | 8       | 1765 | (-) | CWNAWTKWSATRYN       | GACATTCAGTTCA            |
| M0016 |            | 0.87382 |      |     |                      |                          |
| 2     | V\$OCT1_06 | 8       | 1777 | (+) | CWNAWTKWSATRYN       | CAAACCTTTATTTA           |
| M0013 |            | 0.80489 |      |     | NNNNNNNNWATGCAAATNNN |                          |
| 8     | V\$OCT1_04 | 3       | 1778 | (+) | WNNW                 | AAACTTTTATTATAGGCAAAAA   |
| M0013 |            | 0.79945 |      |     | NNNNNNNNWATGCAAATNNN |                          |
| 8     | V\$OCT1_04 | 6       | 1784 | (+) | WNNW                 | TTATTTATAGGCAAAAAAGAATAC |
| M0013 |            | 0.76058 |      |     |                      |                          |
| 5     | V\$OCT1_01 | 8       | 1786 | (+) | NNNNWTATGCAAATNTNNN  | ATTATAGGCAAAAAAGAAT      |
| M0013 |            | 0.78565 |      |     | NNNNNNNNWATGCAAATNNN |                          |
| 8     | V\$OCT1_04 | 5       | 1812 | (+) | WNNW                 | CCAGATAAAGGGAAATACTTATT  |
| M0013 |            |         |      |     | NNNNNNNNWATGCAAATNNN | AAAGGGAAA-               |
| 8     | V\$OCT1_04 |         |      |     | WNNW                 | TACTTATTCAAAGT           |
| M0013 |            | 0.82936 |      |     | NNNNNNNNWATGCAAATNNN | AAATACTTATTCAAAGTAGA-    |
| 8     | V\$OCT1_04 | 4       | 1824 | (+) | WNNW                 | GAA                      |

|       |            |         |      |     |                     |                         |
|-------|------------|---------|------|-----|---------------------|-------------------------|
| M0013 |            |         |      |     |                     |                         |
| 5     | V\$OCT1_01 | 0.77852 | 1826 | (+) | NNNNWTATGCAAATNTNNN | ATACTTATTCAAAGTAGAG     |
| M0013 |            |         |      |     |                     |                         |
| 6     | V\$OCT1_02 | 0.80536 | 1826 | (+) | NNGAATATKCANNNN     | ATACTTATTCAAAGT         |
| M0019 |            | 0.81195 |      |     |                     |                         |
| 5     | V\$OCT1_Q6 | 4       | 1828 | (+) | NNNNATGCAAATNAN     | ACTTATTCAAAGTAG         |
| M0016 |            | 0.81914 |      |     |                     |                         |
| 2     | V\$OCT1_06 | 1       | 1829 | (-) | CWNAWTKWSATRYN      | CTTATTCAAAGTAG          |
| M0016 |            | 0.85546 |      |     |                     |                         |
| 2     | V\$OCT1_06 | 9       | 1934 | (-) | CWNAWTKWSATRYN      | GCTATCTAATTCTT          |
| M0016 |            | 0.81640 |      |     |                     |                         |
| 2     | V\$OCT1_06 | 6       | 1948 | (+) | CWNAWTKWSATRYN      | TAGCCTGGCATTTA          |
| M0016 |            | 0.81640 |      |     |                     |                         |
| 2     | V\$OCT1_06 | 6       | 1953 | (+) | CWNAWTKWSATRYN      | TGGCATTTAATGCC          |
| M0016 |            | 0.88046 |      |     |                     |                         |
| 2     | V\$OCT1_06 | 9       | 1954 | (-) | CWNAWTKWSATRYN      | GGCATTTAATGCCT          |
| M0016 |            | 0.80976 |      |     |                     |                         |
| 2     | V\$OCT1_06 | 6       | 1990 | (-) | CWNAWTKWSATRYN      | TCTATCCAACTTTG          |
| M0019 |            | 0.81522 |      |     |                     |                         |
| 5     | V\$OCT1_Q6 | 9       | 2016 | (+) | NNNNATGCAAATNAN     | CTCCATTCAAATGCC         |
| M0016 |            | 0.81406 |      |     |                     |                         |
| 2     | V\$OCT1_06 | 2       | 2017 | (-) | CWNAWTKWSATRYN      | TCCATTCAAATGCC          |
| M0013 |            | 0.80050 |      |     | NNNNNNNWATGCAAATNNN |                         |
| 8     | V\$OCT1_04 | 2       | 2024 | (+) | WNNW                | AAATGCCCATGGATATTCCTAAG |
| M0013 |            | 0.86789 |      |     |                     |                         |
| 6     | V\$OCT1_02 | 4       | 2029 | (-) | NNGAATATKCANNNN     | CCCATGGATATTCCT         |
| M0013 |            | 0.84894 |      |     |                     |                         |
| 6     | V\$OCT1_02 | 4       | 2032 | (+) | NNGAATATKCANNNN     | ATGGATATTCCTAAG         |
| M0013 |            |         |      |     |                     |                         |
| 7     | V\$OCT1_03 | 0.84275 | 2039 | (+) | NNNRTAATNANNN       | TTCCTAAGGAGTT           |
| M0013 |            | 0.79673 |      |     | NNNNNNNWATGCAAATNNN |                         |
| 8     | V\$OCT1_04 | 8       | 2075 | (-) | WNNW                | TATTAATCTCTGCATGGGCAAGT |
| M0013 |            | 0.76650 |      |     |                     |                         |
| 5     | V\$OCT1_01 | 1       | 2101 | (+) | NNNNWTATGCAAATNTNNN | ACCTATATGCTATGTCCTA     |
| M0013 |            | 0.77043 |      |     |                     |                         |
| 6     | V\$OCT1_02 | 9       | 2101 | (+) | NNGAATATKCANNNN     | ACCTATATGCTATGT         |
| M0016 |            | 0.82148 |      |     |                     |                         |
| 2     | V\$OCT1_06 | 4       | 2104 | (-) | CWNAWTKWSATRYN      | TATATGCTATGTCC          |
| M0024 |            | 0.79923 |      |     |                     |                         |
| 8     | V\$OCT1_07 | 7       | 2104 | (+) | TNTATGNTAATT        | TATATGCTATGT            |
| M0016 |            | 0.80039 |      |     |                     |                         |
| 2     | V\$OCT1_06 | 1       | 2127 | (+) | CWNAWTKWSATRYN      | AATTTATTGATTTC          |
| M0016 |            | 0.83203 |      |     |                     |                         |
| 2     | V\$OCT1_06 | 1       | 2199 | (+) | CWNAWTKWSATRYN      | CTAACAGTGATTTG          |
| M0019 |            |         |      |     |                     |                         |
| 5     | V\$OCT1_Q6 | 0.85071 | 2205 | (-) | NNNNATGCAAATNAN     | GTGATTTGTGTACAT         |
| M0016 |            | 0.82695 |      |     |                     |                         |
| 2     | V\$OCT1_06 | 3       | 2227 | (+) | CWNAWTKWSATRYN      | CTTCCTAAAATTTA          |
| M0016 |            | 0.81718 |      |     |                     |                         |
| 2     | V\$OCT1_06 | 7       | 2231 | (+) | CWNAWTKWSATRYN      | CTAAAATTTATGTT          |
| M0016 |            | 0.81367 |      |     |                     |                         |
| 2     | V\$OCT1_06 | 2       | 2233 | (-) | CWNAWTKWSATRYN      | AAAATTTATGTTAC          |
| M0013 |            | 0.73082 |      |     |                     |                         |
| 5     | V\$OCT1_01 | 8       | 2234 | (+) | NNNNWTATGCAAATNTNNN | AAATTTATGTTACTTGACC     |
| M0024 |            | 0.89039 |      |     |                     |                         |
| 8     | V\$OCT1_07 | 6       | 2237 | (+) | TNTATGNTAATT        | TTTATGTTACTT            |
| M0019 |            | 0.80540 |      |     |                     |                         |
| 5     | V\$OCT1_Q6 | 4       | 2304 | (-) | NNNNATGCAAATNAN     | GTTATTGGTACATAT         |
| M0016 |            | 0.83437 |      |     |                     |                         |
| 2     | V\$OCT1_06 | 5       | 2314 | (-) | CWNAWTKWSATRYN      | CATATGAAACGAAT          |
| M0016 |            | 0.80859 |      |     |                     |                         |
| 2     | V\$OCT1_06 | 4       | 2336 | (+) | CWNAWTKWSATRYN      | AACCTTGTAATGAC          |
| M0013 |            | 0.90438 |      |     |                     |                         |
| 7     | V\$OCT1_03 | 6       | 2339 | (+) | NNNRTAATNANNN       | CTTGTAATGACTC           |
| M0016 |            | 0.80039 |      |     |                     |                         |
| 2     | V\$OCT1_06 | 1       | 2361 | (-) | CWNAWTKWSATRYN      | CATAACCAAAAATT          |



|       |            |         |      |     |                      |                          |
|-------|------------|---------|------|-----|----------------------|--------------------------|
| M0016 |            | 0.93242 |      |     |                      |                          |
| 2     | V\$OCT1_06 | 2       | 2368 | (+) | CWNAWTKWSATRYN       | AAAAATTAAATTCA           |
| M0013 |            | 0.85048 |      |     | NNNNNNNNWATGCAAATNNN |                          |
| 8     | V\$OCT1_04 | 1       | 2369 | (+) | WNNW                 | AAAATTAAATTCATATATTTTCCT |
| M0016 |            | 0.90390 |      |     |                      |                          |
| 2     | V\$OCT1_06 | 6       | 2369 | (-) | CWNAWTKWSATRYN       | AAAATTAAATTCAT           |
| M0013 |            | 0.80211 |      |     |                      |                          |
| 6     | V\$OCT1_02 | 2       | 2371 | (+) | NNGAATATKCANNNN      | AATTAAATTCATATA          |
| M0016 |            | 0.86015 |      |     |                      |                          |
| 2     | V\$OCT1_06 | 6       | 2372 | (+) | CWNAWTKWSATRYN       | ATTAAATTCATATA           |
| M0016 |            | 0.81367 |      |     |                      |                          |
| 2     | V\$OCT1_06 | 2       | 2374 | (-) | CWNAWTKWSATRYN       | TAAATTCATATATT           |
| M0016 |            | 0.82109 |      |     |                      |                          |
| 2     | V\$OCT1_06 | 4       | 2381 | (+) | CWNAWTKWSATRYN       | ATATATTTCTACC            |
| M0013 |            | 0.81409 |      |     | NNNNNNNNWATGCAAATNNN |                          |
| 8     | V\$OCT1_04 | 5       | 2405 | (-) | WNNW                 | TCTAAAGCTTTTAATAAAAATAGA |
| M0016 |            | 0.81367 |      |     |                      |                          |
| 2     | V\$OCT1_06 | 2       | 2409 | (+) | CWNAWTKWSATRYN       | AAGCTTTTAATAAAA          |
| M0013 |            | 0.85223 |      |     |                      |                          |
| 7     | V\$OCT1_03 | 2       | 2412 | (+) | NNNRTAATNANNN        | CTTTTAATAAAAAT           |
| M0016 |            | 0.84726 |      |     |                      |                          |
| 2     | V\$OCT1_06 | 6       | 2418 | (+) | CWNAWTKWSATRYN       | ATAAAATAGATTTT           |
| M0016 |            | 0.81328 |      |     |                      |                          |
| 2     | V\$OCT1_06 | 1       | 2425 | (+) | CWNAWTKWSATRYN       | AGATTTTTCACATT           |
| M0016 |            | 0.80859 |      |     |                      |                          |
| 2     | V\$OCT1_06 | 4       | 2455 | (+) | CWNAWTKWSATRYN       | CATTCTGGCTTTTC           |
| M0016 |            | 0.84726 |      |     |                      |                          |
| 2     | V\$OCT1_06 | 6       | 2476 | (-) | CWNAWTKWSATRYN       | TAAATCAAATAAAAA          |
| M0016 |            | 0.86054 |      |     |                      |                          |
| 2     | V\$OCT1_06 | 7       | 2531 | (+) | CWNAWTKWSATRYN       | GTTAATCTAATGTT           |
| M0016 |            | 0.84218 |      |     |                      |                          |
| 2     | V\$OCT1_06 | 7       | 2532 | (-) | CWNAWTKWSATRYN       | TTAATCTAATGTTT           |
| M0013 |            | 0.83396 |      |     | NNNNNNNNWATGCAAATNNN |                          |
| 8     | V\$OCT1_04 | 1       | 2536 | (-) | WNNW                 | TCTAATGTTTTTAATTTAATTTT  |
| M0016 |            | 0.86992 |      |     |                      |                          |
| 2     | V\$OCT1_06 | 2       | 2540 | (+) | CWNAWTKWSATRYN       | ATGTTTTTAATTTA           |
| M0016 |            | 0.86054 |      |     |                      |                          |
| 2     | V\$OCT1_06 | 7       | 2545 | (+) | CWNAWTKWSATRYN       | TTTAATTTAATTTT           |
| M0024 |            | 0.83167 |      |     |                      |                          |
| 8     | V\$OCT1_07 | 3       | 2545 | (+) | TNTATGNTAATT         | TTTAATTTAATT             |
| M0013 |            | 0.88818 |      |     |                      |                          |
| 7     | V\$OCT1_03 | 6       | 2560 | (+) | NNNRTAATNANNN        | GGTGCAATGATGA            |
| M0016 |            | 0.81640 |      |     |                      |                          |
| 2     | V\$OCT1_06 | 6       | 2607 | (+) | CWNAWTKWSATRYN       | AACCCTGCCATTTT           |
| M0016 |            |         |      |     |                      |                          |
| 2     | V\$OCT1_06 | 0.88125 | 2627 | (+) | CWNAWTKWSATRYN       | GTTAATTTTCATCTA          |
| M0013 |            |         |      |     |                      |                          |
| 7     | V\$OCT1_03 | 0.88226 | 2635 | (+) | NNNRTAATNANNN        | CATCTAATCAGTT            |
| M0016 |            | 0.95039 |      |     |                      |                          |
| 2     | V\$OCT1_06 | 1       | 2648 | (-) | CWNAWTKWSATRYN       | TGTATCAAATTTTT           |
| M0013 |            | 0.80677 |      |     | NNNNNNNNWATGCAAATNNN |                          |
| 8     | V\$OCT1_04 | 5       | 2651 | (+) | WNNW                 | ATCAAATTTTTTAAATTTATTGA  |
| M0013 |            | 0.81095 |      |     | NNNNNNNNWATGCAAATNNN |                          |
| 8     | V\$OCT1_04 | 8       | 2652 | (-) | WNNW                 | TCAAATTTTTTAAATTTATTGAA  |
| M0016 |            | 0.80039 |      |     |                      |                          |
| 2     | V\$OCT1_06 | 1       | 2655 | (+) | CWNAWTKWSATRYN       | AATTTTTTAAATTT           |
| M0016 |            | 0.89062 |      |     |                      |                          |
| 2     | V\$OCT1_06 | 5       | 2656 | (+) | CWNAWTKWSATRYN       | ATTTTTTAAATTTA           |
| M0016 |            | 0.83437 |      |     |                      |                          |
| 2     | V\$OCT1_06 | 5       | 2662 | (-) | CWNAWTKWSATRYN       | TAAATTTATTGAAG           |
| M0013 |            |         |      |     | NNNNNNNNWATGCAAATNNN |                          |
| 8     | V\$OCT1_04 | 0.83647 | 2678 | (+) | WNNW                 | CTTTAATTGTGTAAATTTCTAAA  |
| M0013 |            | 0.83555 |      |     |                      |                          |
| 5     | V\$OCT1_01 | 9       | 2680 | (+) | NNNNWTATGCAAATNTNNN  | TTAATTGTGTAAATTTCTA      |
| M0024 |            | 0.84714 |      |     |                      |                          |
| 8     | V\$OCT1_07 | 9       | 2683 | (+) | TNTATGNTAATT         | ATTGTGTAAATT             |

|       |            |         |      |     |                     |                         |
|-------|------------|---------|------|-----|---------------------|-------------------------|
| M0013 |            | 0.78628 |      |     | NNNNNNNWATGCAAATNNN |                         |
| 8     | V\$OCT1_04 | 2       | 2687 | (-) | WNNW                | TGTAAATTTCTAAATACAGTTAT |
| M0016 |            | 0.82109 |      |     |                     |                         |
| 2     | V\$OCT1_06 | 4       | 2691 | (+) | CWNAWTKWSATRYN      | AATTTCTAAATACA          |
| M0013 |            | 0.78481 |      |     | NNNNNNNWATGCAAATNNN |                         |
| 8     | V\$OCT1_04 | 8       | 2704 | (-) | WNNW                | AGTTATATTTTATAGAACAAAAT |
| M0013 |            |         |      |     | NNNNNNNWATGCAAATNNN | ACAAAATAGC-             |
| 8     | V\$OCT1_04 | 0.789   | 2720 | (-) | WNNW                | TACATAAGTAATT           |
| M0016 |            | 0.85507 |      |     |                     |                         |
| 2     | V\$OCT1_06 | 8       | 2732 | (-) | CWNAWTKWSATRYN      | CATAAGTAATTTAT          |
| M0016 |            | 0.81367 |      |     |                     |                         |
| 2     | V\$OCT1_06 | 2       | 2736 | (+) | CWNAWTKWSATRYN      | AGTAATTTATTTTT          |
| M0019 |            | 0.80349 |      |     |                     |                         |
| 5     | V\$OCT1_Q6 | 3       | 2737 | (-) | NNNNATGCAAATNAN     | GTAATTTATTTTTAC         |
| M0013 |            | 0.86783 |      |     | NNNNNNNWATGCAAATNNN |                         |
| 8     | V\$OCT1_04 | 8       | 2739 | (-) | WNNW                | AATTTATTTTACATTTATTTTT  |
| M0013 |            | 0.75848 |      |     |                     |                         |
| 5     | V\$OCT1_01 | 9       | 2741 | (-) | NNNNWTATGCAAATNTNNN | TTTATTTTACATTTATTT      |
| M0016 |            | 0.86289 |      |     |                     |                         |
| 2     | V\$OCT1_06 | 1       | 2743 | (+) | CWNAWTKWSATRYN      | TATTTTTACATTTA          |
| M0016 |            | 0.86289 |      |     |                     |                         |
| 2     | V\$OCT1_06 | 1       | 2749 | (-) | CWNAWTKWSATRYN      | TACATTTATTTTTC          |
| M0013 |            | 0.79903 |      |     | NNNNNNNWATGCAAATNNN |                         |
| 8     | V\$OCT1_04 | 8       | 2750 | (-) | WNNW                | ACATTTATTTTCTTATTAAAGT  |
| M0016 |            |         |      |     |                     |                         |
| 2     | V\$OCT1_06 | 0.80625 | 2762 | (-) | CWNAWTKWSATRYN      | CTTATTAAAGTCAT          |
| M0016 |            | 0.86015 |      |     |                     |                         |
| 2     | V\$OCT1_06 | 6       | 2765 | (+) | CWNAWTKWSATRYN      | ATTAAAGTCATATT          |
| M0013 |            | 0.80671 |      |     |                     |                         |
| 6     | V\$OCT1_02 | 4       | 2767 | (-) | NNGAATATKCANNNN     | TAAAGTCATATTCTT         |
| M0013 |            | 0.79750 |      |     |                     |                         |
| 6     | V\$OCT1_02 | 9       | 2770 | (+) | NNGAATATKCANNNN     | AGTCATATTCTTCTG         |
| M0013 |            | 0.79590 |      |     | NNNNNNNWATGCAAATNNN |                         |
| 8     | V\$OCT1_04 | 1       | 2774 | (+) | WNNW                | ATATTCTTCTGGATATTCTTCTG |
| M0013 |            |         |      |     |                     |                         |
| 6     | V\$OCT1_02 | 0.86654 | 2779 | (-) | NNGAATATKCANNNN     | CTTCTGGATATTCTT         |
| M0013 |            | 0.82214 |      |     |                     |                         |
| 6     | V\$OCT1_02 | 4       | 2782 | (+) | NNGAATATKCANNNN     | CTGGATATTCTTCTG         |
| M0013 |            |         |      |     |                     |                         |
| 7     | V\$OCT1_03 | 0.86448 | 2804 | (+) | NNNRTAATNANNN       | GGAATAAAGAAAT           |
| M0016 |            | 0.80039 |      |     |                     |                         |
| 2     | V\$OCT1_06 | 1       | 2837 | (+) | CWNAWTKWSATRYN      | AAACCTTTAAAATT          |
| M0016 |            | 0.82890 |      |     |                     |                         |
| 2     | V\$OCT1_06 | 6       | 2838 | (-) | CWNAWTKWSATRYN      | AACCTTTAAAATTC          |
| M0013 |            | 0.78586 |      |     |                     |                         |
| 6     | V\$OCT1_02 | 9       | 2842 | (+) | NNGAATATKCANNNN     | TTTAAAATTCTTATA         |
| M0016 |            | 0.82929 |      |     |                     |                         |
| 2     | V\$OCT1_06 | 7       | 2863 | (+) | CWNAWTKWSATRYN      | AGAAAATACATTTG          |
| M0013 |            |         |      |     | NNNNNNNWATGCAAATNNN |                         |
| 8     | V\$OCT1_04 | 0.82225 | 2881 | (+) | WNNW                | GAAAAATCCTGAAAATATTTTTA |
| M0013 |            | 0.82245 |      |     | NNNNNNNWATGCAAATNNN |                         |
| 8     | V\$OCT1_04 | 9       | 2891 | (+) | WNNW                | GAAAATATTTTTAAATTATAATA |
| M0013 |            | 0.84943 |      |     | NNNNNNNWATGCAAATNNN |                         |
| 8     | V\$OCT1_04 | 5       | 2892 | (-) | WNNW                | AAAATATTTTTAAATTATAATAT |
| M0016 |            | 0.83945 |      |     |                     |                         |
| 2     | V\$OCT1_06 | 3       | 2896 | (-) | CWNAWTKWSATRYN      | TATTTTTAAATTAT          |
| M0024 |            | 0.80771 |      |     |                     |                         |
| 8     | V\$OCT1_07 | 7       | 2896 | (+) | TNTATGNTAATT        | TATTTTTAAATT            |
| M0013 |            | 0.85173 |      |     | NNNNNNNWATGCAAATNNN |                         |
| 8     | V\$OCT1_04 | 6       | 2898 | (-) | WNNW                | TTTTTAAATTATAATATGCACTT |
| M0013 |            | 0.75276 |      |     |                     |                         |
| 5     | V\$OCT1_01 | 6       | 2900 | (-) | NNNNWTATGCAAATNTNNN | TTTAAATTATAATATGCAC     |
| M0016 |            | 0.86601 |      |     |                     |                         |
| 2     | V\$OCT1_06 | 6       | 2902 | (-) | CWNAWTKWSATRYN      | TAAATTATAATATG          |
| M0013 |            | 0.82601 |      |     | NNNNNNNWATGCAAATNNN |                         |
| 8     | V\$OCT1_04 | 4       | 2904 | (-) | WNNW                | AATTATAATATGCACTTAAAATA |

|       |            |         |      |     |                     |                          |
|-------|------------|---------|------|-----|---------------------|--------------------------|
| M0024 |            | 0.81322 |      |     |                     |                          |
| 8     | V\$OCT1_07 | 9       | 2904 | (-) | TNTATGNTAATT        | AATTATAATATG             |
| M0013 |            | 0.91418 |      |     |                     |                          |
| 6     | V\$OCT1_02 | 5       | 2907 | (+) | NNGAATATKCANNNN     | TATAATATGCACTTA          |
| M0013 |            | 0.81723 |      |     | NNNNNNNWATGCAAATNNN |                          |
| 8     | V\$OCT1_04 | 1       | 2909 | (+) | WNNW                | TAATATGCACTTAAAAATAATTCA |
| M0024 |            | 0.81238 |      |     |                     |                          |
| 8     | V\$OCT1_07 | 1       | 2917 | (-) | TNTATGNTAATT        | ACTTAAAAATAAT            |
| M0013 |            | 0.79652 |      |     | NNNNNNNWATGCAAATNNN | TTAAAAATAATTCACAAAAAA-   |
| 8     | V\$OCT1_04 | 9       | 2919 | (+) | WNNW                | TAA                      |
| M0013 |            | 0.78532 |      |     |                     |                          |
| 6     | V\$OCT1_02 | 8       | 2921 | (+) | NNGAATATKCANNNN     | AAAATAATTCACAAA          |
| M0024 |            | 0.79817 |      |     |                     |                          |
| 8     | V\$OCT1_07 | 7       | 2926 | (-) | TNTATGNTAATT        | AATTCACAAAAA             |
| M0013 |            | 0.78523 |      |     | NNNNNNNWATGCAAATNNN | ACAAAAATAAATATATAAAC-    |
| 8     | V\$OCT1_04 | 6       | 2931 | (-) | WNNW                | CA                       |
| M0016 |            | 0.85507 |      |     |                     |                          |
| 2     | V\$OCT1_06 | 8       | 2933 | (+) | CWNAWTKWSATRYN      | AAAAAATAAATATA           |
| M0016 |            | 0.80039 |      |     |                     |                          |
| 2     | V\$OCT1_06 | 1       | 2934 | (-) | CWNAWTKWSATRYN      | AAAAAATAAATATAT          |
| M0024 |            | 0.79351 |      |     |                     |                          |
| 8     | V\$OCT1_07 | 3       | 2937 | (-) | TNTATGNTAATT        | AATAAATATATA             |
| M0019 |            | 0.81304 |      |     |                     |                          |
| 5     | V\$OCT1_Q6 | 6       | 2940 | (+) | NNNNATGCAAATNAN     | AAATATATAAACCAT          |
| M0013 |            | 0.80740 |      |     | NNNNNNNWATGCAAATNNN |                          |
| 8     | V\$OCT1_04 | 3       | 2970 | (+) | WNNW                | ATGTTTTAGTTAAATTCCTATT   |
| M0013 |            | 0.81660 |      |     | NNNNNNNWATGCAAATNNN |                          |
| 8     | V\$OCT1_04 | 4       | 2971 | (-) | WNNW                | TGTTTTAGTTAAATTCCTATT    |
| M0024 |            | 0.80771 |      |     |                     |                          |
| 8     | V\$OCT1_07 | 7       | 2975 | (+) | TNTATGNTAATT        | TTTAGTTAAATT             |
| M0016 |            | 0.81367 |      |     |                     |                          |
| 2     | V\$OCT1_06 | 2       | 2981 | (-) | CWNAWTKWSATRYN      | TAAATTCCTATTTTC          |
| M0013 |            | 0.76230 |      |     |                     |                          |
| 5     | V\$OCT1_01 | 4       | 2989 | (+) | NNNNWTATGCAAATNTNNN | TATTTCATGCAAACCTCAA      |
| M0019 |            | 0.79257 |      |     |                     |                          |
| 5     | V\$OCT1_Q6 | 6       | 2991 | (+) | NNNNATGCAAATNAN     | TTTCATGCAAACCTCC         |
| M0024 |            | 0.81916 |      |     |                     |                          |
| 8     | V\$OCT1_07 | 5       | 2992 | (+) | TNTATGNTAATT        | TTCATGCAAACCT            |
| M0016 |            | 0.82695 |      |     |                     |                          |
| 2     | V\$OCT1_06 | 3       | 2998 | (-) | CWNAWTKWSATRYN      | CAAACCTCCAATTTG          |
| M0016 |            | 0.80078 |      |     |                     |                          |
| 2     | V\$OCT1_06 | 1       | 3015 | (-) | CWNAWTKWSATRYN      | CGAAACTAAATCCT           |
| M0013 |            | 0.79673 |      |     | NNNNNNNWATGCAAATNNN |                          |
| 8     | V\$OCT1_04 | 8       | 3019 | (+) | WNNW                | ACTAAATCCTTAAAATATTAGGA  |
| M0016 |            | 0.81367 |      |     |                     |                          |
| 2     | V\$OCT1_06 | 2       | 3024 | (+) | CWNAWTKWSATRYN      | ATCCTTAAAATATT           |
| M0013 |            | 0.84116 |      |     |                     |                          |
| 7     | V\$OCT1_03 | 9       | 3030 | (-) | NNNRTAATNANNN       | AAAATATTAGGAA            |
| M0016 |            | 0.81328 |      |     |                     |                          |
| 2     | V\$OCT1_06 | 1       | 3063 | (-) | CWNAWTKWSATRYN      | AATTCAAATAACT            |
| M0016 |            | 0.88359 |      |     |                     |                          |
| 2     | V\$OCT1_06 | 4       | 3072 | (+) | CWNAWTKWSATRYN      | TAACCTGACATGTA           |
| M0016 |            | 0.84179 |      |     |                     |                          |
| 2     | V\$OCT1_06 | 7       | 3073 | (-) | CWNAWTKWSATRYN      | AACTTGACATGTAC           |
| M0016 |            | 0.81445 |      |     |                     |                          |
| 2     | V\$OCT1_06 | 3       | 3078 | (-) | CWNAWTKWSATRYN      | GACATGTACTTTTA           |
| M0013 |            |         |      |     | NNNNNNNWATGCAAATNNN |                          |
| 8     | V\$OCT1_04 | 0.82936 | 3079 | (-) | WNNW                | ACATGTACTTTTAATATTTAAGT  |
| M0016 |            | 0.85090 |      |     |                     |                          |
| 1     | V\$OCT1_05 | 5       | 3083 | (+) | MKNATTGTCATAYY      | GTACTTTTAATATT           |
| M0016 |            | 0.89570 |      |     |                     |                          |
| 2     | V\$OCT1_06 | 3       | 3083 | (+) | CWNAWTKWSATRYN      | GTACTTTTAATATT           |
| M0019 |            |         |      |     |                     |                          |
| 5     | V\$OCT1_Q6 | 0.81714 | 3083 | (-) | NNNNATGCAAATNAN     | GTACTTTTAATATTT          |
| M0016 |            | 0.83671 |      |     |                     |                          |
| 2     | V\$OCT1_06 | 9       | 3084 | (-) | CWNAWTKWSATRYN      | TACTTTTAATATT            |

|       |             |         |      |     |                       |                       |
|-------|-------------|---------|------|-----|-----------------------|-----------------------|
| M0013 |             | 0.79046 |      |     | NNNNNNNWATGCAAATNNN   |                       |
| 8     | V\$OCT1_04  | 4       | 3086 | (+) | WNNW                  | CTTTAATATTTAAGTGATTGT |
| M0013 |             | 0.80590 |      |     |                       |                       |
| 6     | V\$OCT1_02  | 1       | 3088 | (+) | NNGAATATKCANNNN       | TTTAATATTTAAGTG       |
| M0016 |             | 0.85507 |      |     |                       |                       |
| 2     | V\$OCT1_06  | 8       | 3091 | (+) | CWNAWTKWSATRYN        | AATATTTAAGTGTA        |
| M0016 |             | 0.85546 |      |     |                       |                       |
| 2     | V\$OCT1_06  | 9       | 3091 | (-) | CWNAWTKWSATRYN        | AATATTTAAGTGTA        |
| M0024 |             | 0.83930 |      |     |                       |                       |
| 8     | V\$OCT1_07  | 5       | 3101 | (+) | TNTATGNTAATT          | TGTATTGTA ACT         |
| M0013 |             | 0.78126 |      |     | NNNNNNNWATGCAAATNNN   |                       |
| 8     | V\$OCT1_04  | 3       | 3108 | (+) | WNNW                  | TAAC TTT              |
| M0022 |             | 0.80841 |      |     |                       |                       |
| 3     | V\$STAT_01  | 9       | 173  | (+) | TTCCCRKAA             | TTCACAGCA             |
| M0022 |             | 0.88858 |      |     |                       |                       |
| 3     | V\$STAT_01  | 1       | 212  | (-) | TTCCCRKAA             | TTAGAAGAA             |
| M0022 |             | 0.85152 |      |     |                       |                       |
| 3     | V\$STAT_01  | 5       | 317  | (+) | TTCCCRKAA             | TTATGATAA             |
| M0022 |             | 0.88807 |      |     |                       |                       |
| 3     | V\$STAT_01  | 7       | 317  | (-) | TTCCCRKAA             | TTATGATAA             |
| M0022 |             |         |      |     |                       |                       |
| 3     | V\$STAT_01  | 0.80968 | 398  | (+) | TTCCCRKAA             | TTCTTAAAA             |
| M0022 |             | 0.85354 |      |     |                       |                       |
| 3     | V\$STAT_01  | 2       | 469  | (-) | TTCCCRKAA             | TTTTAGGAA             |
| M0022 |             | 0.84345 |      |     |                       |                       |
| 3     | V\$STAT_01  | 9       | 691  | (-) | TTCCCRKAA             | TGATAAGAA             |
| M0022 |             | 0.83488 |      |     |                       |                       |
| 3     | V\$STAT_01  | 8       | 724  | (+) | TTCCCRKAA             | TTATGCTAA             |
| M0022 |             | 0.81925 |      |     |                       |                       |
| 3     | V\$STAT_01  | 9       | 724  | (-) | TTCCCRKAA             | TTATGCTAA             |
| M0022 |             | 0.80589 |      |     |                       |                       |
| 3     | V\$STAT_01  | 9       | 755  | (-) | TTCCCRKAA             | TTACAAGAT             |
| M0022 |             | 0.79253 |      |     |                       |                       |
| 3     | V\$STAT_01  | 8       | 802  | (-) | TTCCCRKAA             | TTATAAAAA             |
| M0022 |             | 0.83690 |      |     |                       |                       |
| 3     | V\$STAT_01  | 4       | 1161 | (-) | TTCCCRKAA             | TTTGAGGAA             |
| M0022 |             | 0.79581 |      |     |                       |                       |
| 3     | V\$STAT_01  | 5       | 1272 | (-) | TTCCCRKAA             | TTCTAGTCA             |
| M0022 |             | 0.73851 |      |     |                       |                       |
| 4     | V\$STAT1_01 | 5       | 1279 | (-) | NNNSANTTCCGGAANTGNSN  | CATTCTTACCTGGAAATCAAA |
| M0022 |             | 0.73019 |      |     |                       |                       |
| 5     | V\$STAT3_01 | 6       | 1279 | (+) | NGNNATTCCSGGAARTGN NN | CATTCTTACCTGGAAATCAAA |
| M0022 |             | 0.75959 |      |     |                       |                       |
| 5     | V\$STAT3_01 | 4       | 1279 | (-) | NGNNATTCCSGGAARTGN NN | CATTCTTACCTGGAAATCAAA |
| M0022 |             | 0.85681 |      |     |                       |                       |
| 3     | V\$STAT_01  | 9       | 1285 | (+) | TTCCCRKAA             | TACCTGGAA             |
| M0022 |             | 0.79959 |      |     |                       |                       |
| 3     | V\$STAT_01  | 7       | 1491 | (-) | TTCCCRKAA             | TTCTAAAAA             |
| M0022 |             | 0.79304 |      |     |                       |                       |
| 3     | V\$STAT_01  | 3       | 1579 | (+) | TTCCCRKAA             | TTCTTCAAA             |
| M0022 |             | 0.81295 |      |     |                       |                       |
| 3     | V\$STAT_01  | 7       | 1666 | (+) | TTCCCRKAA             | TTACTGGAG             |
| M0022 |             | 0.81925 |      |     |                       |                       |
| 3     | V\$STAT_01  | 9       | 1682 | (-) | TTCCCRKAA             | TTATGAAAA             |
| M0022 |             | 0.83261 |      |     |                       |                       |
| 3     | V\$STAT_01  | 9       | 1788 | (-) | TTCCCRKAA             | TTATAGGCA             |
| M0022 |             | 0.81976 |      |     |                       |                       |
| 3     | V\$STAT_01  | 3       | 1869 | (+) | TTCCCRKAA             | TTCTCCAAA             |
| M0022 |             | 0.72962 |      |     |                       |                       |
| 4     | V\$STAT1_01 | 3       | 1896 | (-) | NNNSANTTCCGGAANTGNSN  | AGTTTCTTACCTGAAGCCACT |
| M0022 |             | 0.71310 |      |     |                       |                       |
| 5     | V\$STAT3_01 | 6       | 1896 | (-) | NGNNATTCCSGGAARTGN NN | AGTTTCTTACCTGAAGCCACT |
| M0022 |             | 0.85354 |      |     |                       |                       |
| 3     | V\$STAT_01  | 2       | 1902 | (+) | TTCCCRKAA             | TTACCTGAA             |
| M0022 |             | 0.84371 |      |     |                       |                       |
| 3     | V\$STAT_01  | 1       | 1902 | (-) | TTCCCRKAA             | TTACCTGAA             |

|       |             |         |      |     |                       |                         |
|-------|-------------|---------|------|-----|-----------------------|-------------------------|
| M0022 |             | 0.84648 |      |     |                       |                         |
| 3     | V\$STAT_01  | 3       | 1977 | (+) | TTCCCRKAA             | TTGCCCTAA               |
| M0022 |             | 0.76140 |      |     |                       |                         |
| 4     | V\$STAT1_01 | 3       | 2051 | (-) | NNNSANTTCCGGAANTGNSN  | TCTCTTTTCCTTGAAGTTCCT   |
| M0022 |             |         |      |     |                       |                         |
| 5     | V\$STAT3_01 | 0.72614 | 2051 | (+) | NGNNATTTCSSGGAARTGNNN | TCTCTTTTCCTTGAAGTTCCT   |
| M0022 |             | 0.73830 |      |     |                       |                         |
| 5     | V\$STAT3_01 | 6       | 2051 | (-) | NGNNATTTCSSGGAARTGNNN | TCTCTTTTCCTTGAAGTTCCT   |
| M0022 |             | 0.87068 |      |     |                       |                         |
| 3     | V\$STAT_01  | 3       | 2057 | (+) | TTCCCRKAA             | TTCTTGAA                |
| M0022 |             | 0.85354 |      |     |                       |                         |
| 3     | V\$STAT_01  | 2       | 2228 | (+) | TTCCCRKAA             | TTCTAAAA                |
| M0022 |             | 0.79178 |      |     |                       |                         |
| 3     | V\$STAT_01  | 2       | 2387 | (+) | TTCCCRKAA             | TTCTACCA                |
| M0022 |             | 0.83337 |      |     |                       |                         |
| 3     | V\$STAT_01  | 5       | 2513 | (+) | TTCCCRKAA             | TTATCAGCA               |
| M0022 |             | 0.79505 |      |     |                       |                         |
| 3     | V\$STAT_01  | 9       | 2596 | (+) | TTCCCRKAA             | ATCTGGCA                |
| M0022 |             | 0.81976 |      |     |                       |                         |
| 3     | V\$STAT_01  | 3       | 2633 | (+) | TTCCCRKAA             | TTCTCTAA                |
| M0022 |             | 0.79052 |      |     |                       |                         |
| 3     | V\$STAT_01  | 2       | 2760 | (+) | TTCCCRKAA             | TTCTTATTA               |
| M0022 |             | 0.83967 |      |     |                       |                         |
| 3     | V\$STAT_01  | 7       | 2799 | (-) | TTCCCRKAA             | CTCTAGGAA               |
| M0022 |             | 0.80186 |      |     |                       |                         |
| 3     | V\$STAT_01  | 5       | 2875 | (-) | TTCCCRKAA             | TGGGGGGAA               |
| M0022 |             | 0.81598 |      |     |                       |                         |
| 3     | V\$STAT_01  | 2       | 2953 | (-) | TTCCCRKAA             | ATAGAGGAA               |
| M0022 |             | 0.72649 |      |     |                       |                         |
| 4     | V\$STAT1_01 | 4       | 2986 | (-) | NNNSANTTCCGGAANTGNSN  | TCCTATTTTCATGCAAACCTCCA |
| M0022 |             | 0.71296 |      |     |                       |                         |
| 5     | V\$STAT3_01 | 2       | 2986 | (-) | NGNNATTTCSSGGAARTGNNN | TCCTATTTTCATGCAAACCTCCA |
| M0005 |             | 0.81913 |      |     |                       |                         |
| 9     | V\$YY1_01   | 5       | 32   | (+) | NNNNNCCATNTWNNNNWN    | TAACACCCTTTAATTAG       |
| M0005 |             | 0.80340 |      |     |                       |                         |
| 9     | V\$YY1_01   | 8       | 215  | (+) | NNNNNCCATNTWNNNNWN    | GAAGAACATTTTCTTCC       |
| M0005 |             | 0.79161 |      |     |                       |                         |
| 9     | V\$YY1_01   | 2       | 471  | (-) | NNNNNCCATNTWNNNNWN    | TTAGGAAGATGAAAGTA       |
| M0005 |             | 0.80045 |      |     |                       |                         |
| 9     | V\$YY1_01   | 9       | 548  | (+) | NNNNNCCATNTWNNNNWN    | TAATTTTCATTTGTCATA      |
| M0005 |             |         |      |     |                       |                         |
| 9     | V\$YY1_01   | 0.80865 | 691  | (-) | NNNNNCCATNTWNNNNWN    | TGATAAGAATGGTCTTA       |
| M0005 |             | 0.90563 |      |     |                       |                         |
| 9     | V\$YY1_01   | 6       | 745  | (+) | NNNNNCCATNTWNNNNWN    | TACTACCATTTTACAAG       |
| M0005 |             | 0.81487 |      |     |                       |                         |
| 9     | V\$YY1_01   | 5       | 754  | (-) | NNNNNCCATNTWNNNNWN    | TTACAAGATGTTTTTG        |
| M0005 |             | 0.86664 |      |     |                       |                         |
| 9     | V\$YY1_01   | 5       | 783  | (+) | NNNNNCCATNTWNNNNWN    | TGATATCATTTTGCATG       |
| M0005 |             |         |      |     |                       |                         |
| 9     | V\$YY1_01   | 0.78637 | 809  | (+) | NNNNNCCATNTWNNNNWN    | AAATTCATGATTCACC        |
| M0005 |             | 0.77948 |      |     |                       |                         |
| 9     | V\$YY1_01   | 9       | 959  | (-) | NNNNNCCATNTWNNNNWN    | AAAAAGAAATGATAATT       |
| M0005 |             |         |      |     |                       |                         |
| 9     | V\$YY1_01   | 0.78211 | 1138 | (+) | NNNNNCCATNTWNNNNWN    | GAGCTCCATTCTATTCA       |
| M0005 |             | 0.79816 |      |     |                       |                         |
| 9     | V\$YY1_01   | 5       | 1215 | (+) | NNNNNCCATNTWNNNNWN    | CTTTTCCATTGAGTAT        |
| M0005 |             | 0.77031 |      |     |                       |                         |
| 9     | V\$YY1_01   | 5       | 1248 | (+) | NNNNNCCATNTWNNNNWN    | TGAAGTCAGTTTAGTAG       |
| M0005 |             | 0.83387 |      |     |                       |                         |
| 9     | V\$YY1_01   | 9       | 1280 | (-) | NNNNNCCATNTWNNNNWN    | ATTCTTACCTGGAAATC       |
| M0005 |             | 0.77785 |      |     |                       |                         |
| 9     | V\$YY1_01   | 1       | 1393 | (-) | NNNNNCCATNTWNNNNWN    | ATACAAGCATGATAACA       |
| M0005 |             | 0.78014 |      |     |                       |                         |
| 9     | V\$YY1_01   | 4       | 1402 | (-) | NNNNNCCATNTWNNNNWN    | TGATAACAATGGCTATA       |
| M0005 |             | 0.83093 |      |     |                       |                         |
| 9     | V\$YY1_01   | 1       | 1476 | (-) | NNNNNCCATNTWNNNNWN    | AATGTTATATGATCTTT       |

|                          |            |         |      |     |                      |                      |
|--------------------------|------------|---------|------|-----|----------------------|----------------------|
| M0005                    |            | 0.84600 |      |     |                      |                      |
| 9                        | V\$YY1_01  | 3       | 1683 | (-) | NNNNNCCATNTWNNNWN    | TATGAAAAATGCAGTTT    |
| M0005                    |            | 0.77195 |      |     |                      |                      |
| 9                        | V\$YY1_01  | 3       | 1807 | (+) | NNNNNCCATNTWNNNWN    | TAGGGCCAGATAAAGGG    |
| M0005                    |            | 0.90760 |      |     |                      |                      |
| 9                        | V\$YY1_01  | 2       | 1850 | (-) | NNNNNCCATNTWNNNWN    | AGCCCAAGATGGAGATC    |
| M0005                    |            | 0.77195 |      |     |                      |                      |
| 9                        | V\$YY1_01  | 3       | 1860 | (+) | NNNNNCCATNTWNNNWN    | GGAGATCAGTTCTCAA     |
| M0005                    |            | 0.77752 |      |     |                      |                      |
| 9                        | V\$YY1_01  | 3       | 1889 | (+) | NNNNNCCATNTWNNNWN    | TCACCTCAGTTTCTTAC    |
| M0005                    |            | 0.77391 |      |     |                      |                      |
| 9                        | V\$YY1_01  | 9       | 2013 | (+) | NNNNNCCATNTWNNNWN    | TCCCTCCATTCAAATGC    |
| M0005                    |            | 0.78833 |      |     |                      |                      |
| 9                        | V\$YY1_01  | 6       | 2137 | (-) | NNNNNCCATNTWNNNWN    | TTTCTTAACTGAACACT    |
| M0005                    |            |         |      |     |                      |                      |
| 9                        | V\$YY1_01  | 0.80308 | 2374 | (+) | NNNNNCCATNTWNNNWN    | TAAATTCATATATTTC     |
| M0005                    |            | 0.78342 |      |     |                      |                      |
| 9                        | V\$YY1_01  | 1       | 2388 | (+) | NNNNNCCATNTWNNNWN    | TCCTACCATTGGTTTT     |
| M0005                    |            | 0.80275 |      |     |                      |                      |
| 9                        | V\$YY1_01  | 2       | 2561 | (-) | NNNNNCCATNTWNNNWN    | GTGCAATGATGAAGAGT    |
| M0006                    |            | 0.83059 |      |     |                      |                      |
| 9                        | V\$YY1_02  | 6       | 2608 | (+) | NNNCGGCCATCTTGNCTSNW | ACCCTGCCATTTTTGGTGAG |
| M0005                    |            | 0.89056 |      |     |                      |                      |
| 9                        | V\$YY1_01  | 4       | 2609 | (+) | NNNNNCCATNTWNNNWN    | CCCTGCCATTTTTGGTG    |
| M0005                    |            | 0.82830 |      |     |                      |                      |
| 9                        | V\$YY1_01  | 9       | 2629 | (+) | NNNNNCCATNTWNNNWN    | TAATTTCACTAATCAG     |
| M0005                    |            | 0.80701 |      |     |                      |                      |
| 9                        | V\$YY1_01  | 2       | 2637 | (+) | NNNNNCCATNTWNNNWN    | TCTAATCAGTTTGTATC    |
| M0005                    |            | 0.77785 |      |     |                      |                      |
| 9                        | V\$YY1_01  | 1       | 2767 | (+) | NNNNNCCATNTWNNNWN    | TAAAGTCATATTCTTCT    |
| M0005                    |            | 0.77522 |      |     |                      |                      |
| 9                        | V\$YY1_01  | 9       | 2821 | (+) | NNNNNCCATNTWNNNWN    | CTTTATCATCTAGAGAA    |
| M0005                    |            | 0.77522 |      |     |                      |                      |
| 9                        | V\$YY1_01  | 9       | 2848 | (-) | NNNNNCCATNTWNNNWN    | ATTCTTATATGATAGAG    |
| M0005                    |            |         |      |     |                      |                      |
| 9                        | V\$YY1_01  | 0.84633 | 2905 | (-) | NNNNNCCATNTWNNNWN    | ATTATAATATGCACTTA    |
| M0005                    |            | 0.79816 |      |     |                      |                      |
| 9                        | V\$YY1_01  | 5       | 2946 | (+) | NNNNNCCATNTWNNNWN    | ATAAACCATAGAGGAAG    |
| M0005                    |            | 0.79456 |      |     |                      |                      |
| 9                        | V\$YY1_01  | 1       | 2949 | (-) | NNNNNCCATNTWNNNWN    | AACCATAGAGGAAGATC    |
| M0005                    |            | 0.82241 |      |     |                      |                      |
| 9                        | V\$YY1_01  | 2       | 2962 | (-) | NNNNNCCATNTWNNNWN    | GATCAGAAATGTTTTTA    |
| M0005                    |            | 0.78505 |      |     |                      |                      |
| 9                        | V\$YY1_01  | 9       | 2981 | (+) | NNNNNCCATNTWNNNWN    | TAAATTCCTATTTCATG    |
| CSN1S1 <i>Ovis Aries</i> |            |         |      |     |                      |                      |
|                          |            | 0.77366 |      |     |                      |                      |
| M00252                   | V\$TATA_01 | 2       | 53   | (+) | STATAAAWRNNNNNN      | TTATGTATACATATA      |
|                          |            | 0.78787 |      |     |                      |                      |
| M00252                   | V\$TATA_01 | 1       | 57   | (+) | STATAAAWRNNNNNN      | GTATACATATAAAAA      |
|                          |            | 0.77848 |      |     |                      |                      |
| M00252                   | V\$TATA_01 | 3       | 59   | (+) | STATAAAWRNNNNNN      | ATACATATAAAAAAA      |
|                          |            | 0.78188 |      |     |                      |                      |
| M00216                   | V\$TATA_C  | 5       | 60   | (+) | NCTATAAAAR           | TACATATAAA           |
|                          |            | 0.83608 |      |     |                      |                      |
| M00252                   | V\$TATA_01 | 2       | 61   | (+) | STATAAAWRNNNNNN      | ACATATAAAAAAACT      |
|                          |            | 0.87325 |      |     |                      |                      |
| M00216                   | V\$TATA_C  | 1       | 62   | (+) | NCTATAAAAR           | CATATAAAAA           |
|                          |            | 0.87668 |      |     |                      |                      |
| M00252                   | V\$TATA_01 | 1       | 63   | (+) | STATAAAWRNNNNNN      | ATATAAAAAAACTTA      |
|                          |            | 0.75178 |      |     |                      |                      |
| M00216                   | V\$TATA_C  | 2       | 64   | (+) | NCTATAAAAR           | TATAAAAAAA           |
|                          |            | 0.77010 |      |     |                      |                      |
| M00252                   | V\$TATA_01 | 9       | 65   | (+) | STATAAAWRNNNNNN      | ATAAAAAAACTTATT      |
|                          |            | 0.89384 |      |     |                      |                      |
| M00216                   | V\$TATA_C  | 7       | 177  | (+) | NCTATAAAAR           | AGCTTAAAAA           |

|        |            |         |     |     |                 |                  |
|--------|------------|---------|-----|-----|-----------------|------------------|
|        |            | 0.81172 |     |     |                 |                  |
| M00216 | V\$TATA_C  | 4       | 178 | (+) | NCTATAAAAR      | GCTTAAAAAT       |
|        |            | 0.80131 |     |     |                 |                  |
| M00252 | V\$TATA_01 | 9       | 178 | (+) | STATAAAWRNNNNNN | GCTTAAAAATATATT  |
|        |            | 0.77594 |     |     |                 |                  |
| M00252 | V\$TATA_01 | 5       | 184 | (+) | STATAAAWRNNNNNN | AAATATATTTGCAAA  |
|        |            | 0.81806 |     |     |                 |                  |
| M00252 | V\$TATA_01 | 6       | 186 | (+) | STATAAAWRNNNNNN | ATATATTTGCAAAATG |
|        |            | 0.82519 |     |     |                 |                  |
| M00216 | V\$TATA_C  | 1       | 243 | (+) | NCTATAAAAR      | CTTTTATAAA       |
|        |            | 0.82161 |     |     |                 |                  |
| M00252 | V\$TATA_01 | 9       | 244 | (+) | STATAAAWRNNNNNN | TTTATAAAAGACCAA  |
|        |            | 0.79376 |     |     |                 |                  |
| M00216 | V\$TATA_C  | 8       | 245 | (+) | NCTATAAAAR      | TTTATAAAAGA      |
|        |            | 0.87135 |     |     |                 |                  |
| M00252 | V\$TATA_01 | 2       | 246 | (+) | STATAAAWRNNNNNN | TTATAAGACCAAAT   |
|        |            | 0.76102 |     |     |                 |                  |
| M00216 | V\$TATA_C  | 5       | 270 | (+) | NCTATAAAAR      | ATTTTTAAAA       |
|        |            | 0.87272 |     |     |                 |                  |
| M00216 | V\$TATA_C  | 2       | 271 | (+) | NCTATAAAAR      | TTTTTAAAAAT      |
|        |            | 0.85740 |     |     |                 |                  |
| M00216 | V\$TATA_C  | 7       | 362 | (+) | NCTATAAAAR      | TCTGTAAAAT       |
|        |            | 0.75917 |     |     |                 |                  |
| M00216 | V\$TATA_C  | 6       | 387 | (+) | NCTATAAAAR      | AATTTATAAT       |
|        |            | 0.75732 |     |     |                 |                  |
| M00216 | V\$TATA_C  | 8       | 453 | (+) | NCTATAAAAR      | TCCATGTAAT       |
|        |            | 0.81779 |     |     |                 |                  |
| M00216 | V\$TATA_C  | 8       | 467 | (+) | NCTATAAAAR      | TTAATAAAAT       |
|        |            |         |     |     |                 |                  |
| M00216 | V\$TATA_C  | 0.81859 | 479 | (+) | NCTATAAAAR      | ATTTTATAAA       |
|        |            |         |     |     |                 |                  |
| M00252 | V\$TATA_01 | 0.84268 | 480 | (+) | STATAAAWRNNNNNN | TTTTATAAGGAAAC   |
|        |            | 0.80512 |     |     |                 |                  |
| M00216 | V\$TATA_C  | 3       | 481 | (+) | NCTATAAAAR      | TTTATAAAGG       |
|        |            | 0.82567 |     |     |                 |                  |
| M00252 | V\$TATA_01 | 9       | 482 | (+) | STATAAAWRNNNNNN | TTATAAGGAAACAC   |
|        |            | 0.79370 |     |     |                 |                  |
| M00252 | V\$TATA_01 | 7       | 512 | (+) | STATAAAWRNNNNNN | AGATATAAATGATTA  |
|        |            | 0.75125 |     |     |                 |                  |
| M00216 | V\$TATA_C  | 4       | 513 | (+) | NCTATAAAAR      | GATATAAATG       |
|        |            | 0.86196 |     |     |                 |                  |
| M00252 | V\$TATA_01 | 4       | 514 | (+) | STATAAAWRNNNNNN | ATATAAATGATTACT  |
|        |            | 0.82519 |     |     |                 |                  |
| M00216 | V\$TATA_C  | 1       | 527 | (+) | NCTATAAAAR      | CTTTTATAAA       |
|        |            | 0.80512 |     |     |                 |                  |
| M00252 | V\$TATA_01 | 6       | 528 | (+) | STATAAAWRNNNNNN | TTTTATAAGATGAT   |
|        |            | 0.79376 |     |     |                 |                  |
| M00216 | V\$TATA_C  | 8       | 529 | (+) | NCTATAAAAR      | TTTATAAAGA       |
|        |            | 0.82161 |     |     |                 |                  |
| M00252 | V\$TATA_01 | 9       | 530 | (+) | STATAAAWRNNNNNN | TTATAAGATGATTA   |
|        |            | 0.83633 |     |     |                 |                  |
| M00252 | V\$TATA_01 | 6       | 552 | (+) | STATAAAWRNNNNNN | ATATTTATAAGGATA  |
|        |            | 0.79508 |     |     |                 |                  |
| M00216 | V\$TATA_C  | 8       | 553 | (+) | NCTATAAAAR      | TATTTATAAG       |
|        |            | 0.84572 |     |     |                 |                  |
| M00252 | V\$TATA_01 | 4       | 554 | (+) | STATAAAWRNNNNNN | ATTTATAAGGATACA  |
|        |            | 0.77772 |     |     |                 |                  |
| M00252 | V\$TATA_01 | 1       | 556 | (+) | STATAAAWRNNNNNN | TTATAAGGATACAAA  |
|        |            | 0.77010 |     |     |                 |                  |
| M00252 | V\$TATA_01 | 9       | 564 | (+) | STATAAAWRNNNNNN | ATACAAATATATGAA  |
|        |            | 0.79497 |     |     |                 |                  |
| M00252 | V\$TATA_01 | 6       | 568 | (+) | STATAAAWRNNNNNN | AAATATATGAAAATA  |
|        |            | 0.80081 |     |     |                 |                  |
| M00252 | V\$TATA_01 | 2       | 570 | (+) | STATAAAWRNNNNNN | ATATATGAAAATAAT  |
|        |            | 0.75178 |     |     |                 |                  |
| M00216 | V\$TATA_C  | 2       | 571 | (+) | NCTATAAAAR      | TATATGAAAA       |

|        |            |                    |      |     |                 |                 |
|--------|------------|--------------------|------|-----|-----------------|-----------------|
| M00216 | V\$TATA_C  | 0.82466<br>3       | 597  | (+) | NCTATAAAAR      | GGCTTATAAA      |
| M00252 | V\$TATA_01 | 0.78127<br>4       | 598  | (+) | STATAAAWRNNNNNN | GCTTATAAATATGTC |
| M00216 | V\$TATA_C  | 0.79324<br>0.85587 | 599  | (+) | NCTATAAAAR      | CTTATAAATA      |
| M00252 | V\$TATA_01 | 4                  | 600  | (+) | STATAAAWRNNNNNN | TTATAAATATGTCTT |
| M00216 | V\$TATA_C  | 0.76815<br>4       | 614  | (+) | NCTATAAAAR      | TTTTTAACAA      |
| M00252 | V\$TATA_01 | 0.77746<br>8       | 642  | (+) | STATAAAWRNNNNNN | GTTTGTAAGTGAAG  |
| M00216 | V\$TATA_C  | 0.80987<br>6       | 660  | (+) | NCTATAAAAR      | CCTGTATAAA      |
| M00252 | V\$TATA_01 | 0.7729<br>0.93662  | 661  | (+) | STATAAAWRNNNNNN | CTGTATAAATAATC  |
| M00216 | V\$TATA_C  | 5                  | 662  | (+) | NCTATAAAAR      | TGTATAAAAT      |
| M00252 | V\$TATA_01 | 0.87744<br>2       | 663  | (+) | STATAAAWRNNNNNN | GTATAAATAATCTG  |
| M00216 | V\$TATA_C  | 0.82017<br>4       | 697  | (+) | NCTATAAAAR      | GGTATAAACA      |
| M00252 | V\$TATA_01 | 0.79370<br>7       | 698  | (+) | STATAAAWRNNNNNN | GTATAAACAAATTC  |
| M00252 | V\$TATA_01 | 0.77340<br>8       | 732  | (+) | STATAAAWRNNNNNN | TTATTATCTGAAAT  |
| M00216 | V\$TATA_C  | 0.78135<br>7       | 759  | (+) | NCTATAAAAR      | CACATATAAA      |
| M00252 | V\$TATA_01 | 0.81375<br>3       | 760  | (+) | STATAAAWRNNNNNN | ACATATAAATTTATG |
| M00252 | V\$TATA_01 | 0.82847<br>0.77036 | 762  | (+) | STATAAAWRNNNNNN | ATATAAATTTATGTA |
| M00252 | V\$TATA_01 | 3                  | 790  | (+) | STATAAAWRNNNNNN | CAATTTAATGGAAC  |
| M00252 | V\$TATA_01 | 0.79091<br>6       | 871  | (+) | STATAAAWRNNNNNN | GGATATATCAACCAA |
| M00252 | V\$TATA_01 | 0.83253<br>0.74914 | 873  | (+) | STATAAAWRNNNNNN | ATATATCAACCAAGC |
| M00216 | V\$TATA_C  | 2                  | 908  | (+) | NCTATAAAAR      | TCCTTTTAAA      |
| M00216 | V\$TATA_C  | 0.84050<br>7       | 909  | (+) | NCTATAAAAR      | CCTTTTAAAA      |
| M00216 | V\$TATA_C  | 0.88962<br>2       | 910  | (+) | NCTATAAAAR      | CTTTTAAAAA      |
| M00216 | V\$TATA_C  | 0.75072<br>6       | 911  | (+) | NCTATAAAAR      | TTTTAAAAAT      |
| M00252 | V\$TATA_01 | 0.78406<br>5       | 911  | (+) | STATAAAWRNNNNNN | TTTTAAAAATTTAAT |
| M00216 | V\$TATA_C  | 0.78479<br>0.79396 | 940  | (+) | NCTATAAAAR      | TCTACATAAT      |
| M00252 | V\$TATA_01 | 1                  | 941  | (+) | STATAAAWRNNNNNN | CTACATAATGCACAA |
| M00216 | V\$TATA_C  | 0.75706<br>4       | 974  | (+) | NCTATAAAAR      | ACTCTGAAAG      |
| M00252 | V\$TATA_01 | 0.81223<br>0.84103 | 995  | (+) | STATAAAWRNNNNNN | GGATAAAGACATCTT |
| M00216 | V\$TATA_C  | 5                  | 1006 | (+) | NCTATAAAAR      | TCITTTTAAAA     |
| M00216 | V\$TATA_C  | 0.88962<br>2       | 1007 | (+) | NCTATAAAAR      | CTTTTAAAAA      |
| M00252 | V\$TATA_01 | 0.77239<br>3       | 1007 | (+) | STATAAAWRNNNNNN | CTTTTAAAAATTACA |
| M00216 | V\$TATA_C  | 0.75072<br>6       | 1008 | (+) | NCTATAAAAR      | TTTTAAAAAT      |
| M00252 | V\$TATA_01 | 0.7932<br>0.74227  | 1008 | (+) | STATAAAWRNNNNNN | TTTTAAAAATTACAG |
| M00216 | V\$TATA_C  | 6                  | 1020 | (+) | NCTATAAAAR      | CAGATAAAAT      |



|        |            |         |      |     |                 |                  |
|--------|------------|---------|------|-----|-----------------|------------------|
|        |            | 0.80487 |      |     |                 |                  |
| M00252 | V\$TATA_01 | 2       | 1021 | (+) | STATAAAWRNNNNNN | AGATAAAATTAAATG  |
|        |            | 0.76102 |      |     |                 |                  |
| M00216 | V\$TATA_C  | 5       | 1060 | (+) | NCTATAAAAR      | ATTTTAACAA       |
|        |            | 0.86559 |      |     |                 |                  |
| M00216 | V\$TATA_C  | 3       | 1114 | (+) | NCTATAAAAR      | ATTTTAAAT        |
|        |            | 0.79751 |      |     |                 |                  |
| M00252 | V\$TATA_01 | 3       | 1129 | (+) | STATAAAWRNNNNNN | ATATTTAAATATTGA  |
|        |            | 0.81705 |      |     |                 |                  |
| M00252 | V\$TATA_01 | 2       | 1131 | (+) | STATAAAWRNNNNNN | ATTTAAATATTGATA  |
|        |            | 0.74016 |      |     |                 |                  |
| M00216 | V\$TATA_C  | 4       | 1234 | (+) | NCTATAAAAR      | CTTAGATAAG       |
|        |            | 0.81299 |      |     |                 |                  |
| M00252 | V\$TATA_01 | 2       | 1271 | (+) | STATAAAWRNNNNNN | ATATTTATATTGAAG  |
|        |            | 0.80131 |      |     |                 |                  |
| M00252 | V\$TATA_01 | 9       | 1273 | (+) | STATAAAWRNNNNNN | ATTTATATTGAAGAG  |
|        |            | 0.87351 |      |     |                 |                  |
| M00216 | V\$TATA_C  | 5       | 1305 | (+) | NCTATAAAAR      | TGAATAAAAA       |
|        |            | 0.80537 |      |     |                 |                  |
| M00252 | V\$TATA_01 | 9       | 1306 | (+) | STATAAAWRNNNNNN | GAATAAAAAATATTAC |
|        |            | 0.81647 |      |     |                 |                  |
| M00216 | V\$TATA_C  | 7       | 1319 | (+) | NCTATAAAAR      | ACTTTCAAAT       |
|        |            | 0.74174 |      |     |                 |                  |
| M00216 | V\$TATA_C  | 8       | 1341 | (+) | NCTATAAAAR      | ATCATAATAT       |
|        |            | 0.75653 |      |     |                 |                  |
| M00216 | V\$TATA_C  | 6       | 1397 | (+) | NCTATAAAAR      | TTATTATAAG       |
|        |            | 0.76023 |      |     |                 |                  |
| M00216 | V\$TATA_C  | 2       | 1399 | (+) | NCTATAAAAR      | ATTATAAGAC       |
|        |            | 0.80565 |      |     |                 |                  |
| M00216 | V\$TATA_C  | 1       | 1439 | (+) | NCTATAAAAR      | ACCATGAAAC       |
|        |            | 0.78716 |      |     |                 |                  |
| M00216 | V\$TATA_C  | 7       | 1499 | (+) | NCTATAAAAR      | ACAGTAAAAA       |
|        |            | 0.80749 |      |     |                 |                  |
| M00216 | V\$TATA_C  | 9       | 1501 | (+) | NCTATAAAAR      | AGTAAAAAAT       |
|        |            | 0.74412 |      |     |                 |                  |
| M00216 | V\$TATA_C  | 5       | 1618 | (+) | NCTATAAAAR      | GCTATTAAGG       |
|        |            | 0.80309 |      |     |                 |                  |
| M00252 | V\$TATA_01 | 6       | 1619 | (+) | STATAAAWRNNNNNN | CTATTAAGGTGTTGA  |
|        |            | 0.75125 |      |     |                 |                  |
| M00216 | V\$TATA_C  | 4       | 1632 | (+) | NCTATAAAAR      | GATATTAAAG       |
|        |            | 0.81806 |      |     |                 |                  |
| M00252 | V\$TATA_01 | 6       | 1633 | (+) | STATAAAWRNNNNNN | ATATTAAAGCTATAG  |
|        |            | 0.74570 |      |     |                 |                  |
| M00216 | V\$TATA_C  | 9       | 1696 | (+) | NCTATAAAAR      | ACTCTAAATA       |
|        |            | 0.80221 |      |     |                 |                  |
| M00216 | V\$TATA_C  | 8       | 1698 | (+) | NCTATAAAAR      | TCTAAATAAA       |
|        |            | 0.77581 |      |     |                 |                  |
| M00216 | V\$TATA_C  | 2       | 1700 | (+) | NCTATAAAAR      | TAAATAAAAT       |
|        |            | 0.79614 |      |     |                 |                  |
| M00216 | V\$TATA_C  | 5       | 1714 | (+) | NCTATAAAAR      | AACTTAAAT        |
|        |            | 0.82821 |      |     |                 |                  |
| M00252 | V\$TATA_01 | 6       | 1720 | (+) | STATAAAWRNNNNNN | AAATATAAACACCTC  |
|        |            | 0.74465 |      |     |                 |                  |
| M00216 | V\$TATA_C  | 3       | 1721 | (+) | NCTATAAAAR      | AATATAAACA       |
|        |            | 0.81299 |      |     |                 |                  |
| M00252 | V\$TATA_01 | 2       | 1722 | (+) | STATAAAWRNNNNNN | ATATAAACACCTCAC  |
|        |            | 0.90097 |      |     |                 |                  |
| M00216 | V\$TATA_C  | 7       | 1735 | (+) | NCTATAAAAR      | ACAATAAAAA       |
|        |            | 0.80055 |      |     |                 |                  |
| M00252 | V\$TATA_01 | 8       | 1736 | (+) | STATAAAWRNNNNNN | CAATAAAAAATTAAA  |
|        |            | 0.76049 |      |     |                 |                  |
| M00216 | V\$TATA_C  | 6       | 1743 | (+) | NCTATAAAAR      | AAATTAAAAA       |
|        |            | 0.76049 |      |     |                 |                  |
| M00216 | V\$TATA_C  | 6       | 1750 | (+) | NCTATAAAAR      | AAATTAAAAA       |
|        |            | 0.79799 |      |     |                 |                  |
| M00216 | V\$TATA_C  | 3       | 1752 | (+) | NCTATAAAAR      | ATTAAAAAAG       |

|        |            |         |      |     |                 |                 |
|--------|------------|---------|------|-----|-----------------|-----------------|
|        |            | 0.76340 |      |     |                 |                 |
| M00216 | V\$TATA_C  | 1       | 1776 | (+) | NCTATAAAAR      | ACAATACAAT      |
|        |            | 0.77898 |      |     |                 |                 |
| M00216 | V\$TATA_C  | 1       | 1781 | (+) | NCTATAAAAR      | ACAATAAAGA      |
|        |            | 0.81324 |      |     |                 |                 |
| M00252 | V\$TATA_01 | 5       | 1782 | (+) | STATAAAWRNNNNNN | CAATAAAGAGCATCA |
| M00216 | V\$TATA_C  | 0.80882 | 1790 | (+) | NCTATAAAAR      | AGCATCAAAG      |
| M00216 | V\$TATA_C  | 0.74967 | 1834 | (+) | NCTATAAAAR      | GGCTTAACAT      |
|        |            | 0.79954 |      |     |                 |                 |
| M00252 | V\$TATA_01 | 3       | 1852 | (+) | STATAAAWRNNNNNN | ACATATATATGTTCA |
|        |            | 0.85587 |      |     |                 |                 |
| M00252 | V\$TATA_01 | 4       | 1854 | (+) | STATAAAWRNNNNNN | ATATATATGTTCAAT |
|        |            | 0.78716 |      |     |                 |                 |
| M00216 | V\$TATA_C  | 7       | 2017 | (+) | NCTATAAAAR      | TGCATGAAAT      |
|        |            | 0.81527 |      |     |                 |                 |
| M00252 | V\$TATA_01 | 5       | 2169 | (+) | STATAAAWRNNNNNN | CTATTAAGCCCTATA |
|        |            | 0.77239 |      |     |                 |                 |
| M00252 | V\$TATA_01 | 3       | 2313 | (+) | STATAAAWRNNNNNN | GTAGAAAGAAAACT  |
| M00216 | V\$TATA_C  | 0.77766 | 2325 | (+) | NCTATAAAAR      | ACTAGATAAT      |
|        |            | 0.74069 |      |     |                 |                 |
| M00216 | V\$TATA_C  | 2       | 2354 | (+) | NCTATAAAAR      | TTCTCAAAAA      |
|        |            | 0.75283 |      |     |                 |                 |
| M00216 | V\$TATA_C  | 9       | 2355 | (+) | NCTATAAAAR      | TCTCAAAAAA      |
|        |            | 0.82060 |      |     |                 |                 |
| M00252 | V\$TATA_01 | 4       | 2374 | (+) | STATAAAWRNNNNNN | TTATTAATGTGAAAC |
| M00216 | V\$TATA_C  | 0.78479 | 2416 | (+) | NCTATAAAAR      | TCTAGATAAT      |
|        |            | 0.78533 |      |     |                 |                 |
| M00252 | V\$TATA_01 | 4       | 2425 | (+) | STATAAAWRNNNNNN | TGATAAATAAATAAA |
|        |            | 0.82872 |      |     |                 |                 |
| M00252 | V\$TATA_01 | 4       | 2429 | (+) | STATAAAWRNNNNNN | AAATAAATAAATAGG |
|        |            | 0.84876 |      |     |                 |                 |
| M00252 | V\$TATA_01 | 9       | 2433 | (+) | STATAAAWRNNNNNN | AAATAAATAGGAATC |
|        |            | 0.77772 |      |     |                 |                 |
| M00252 | V\$TATA_01 | 1       | 2486 | (+) | STATAAAWRNNNNNN | GGATATTTGGACACT |
|        |            | 0.83733 |      |     |                 |                 |
| M00216 | V\$TATA_C  | 8       | 2504 | (+) | NCTATAAAAR      | GCTATCAAAT      |
|        |            | 0.78254 |      |     |                 |                 |
| M00252 | V\$TATA_01 | 3       | 2510 | (+) | STATAAAWRNNNNNN | AAATATAGATGCAAA |
|        |            | 0.79878 |      |     |                 |                 |
| M00252 | V\$TATA_01 | 2       | 2512 | (+) | STATAAAWRNNNNNN | ATATAGATGCAAAAG |
|        |            | 0.79746 |      |     |                 |                 |
| M00216 | V\$TATA_C  | 5       | 2644 | (+) | NCTATAAAAR      | AGCATCAAAA      |
|        |            | 0.75996 |      |     |                 |                 |
| M00216 | V\$TATA_C  | 8       | 2645 | (+) | NCTATAAAAR      | GCATCAAAAG      |
|        |            | 0.77822 |      |     |                 |                 |
| M00252 | V\$TATA_01 | 9       | 2645 | (+) | STATAAAWRNNNNNN | GCATCAAAAGAAGGG |
|        |            | 0.75732 |      |     |                 |                 |
| M00216 | V\$TATA_C  | 8       | 2678 | (+) | NCTATAAAAR      | ACGAAAAAAG      |
|        |            | 0.79497 |      |     |                 |                 |
| M00252 | V\$TATA_01 | 6       | 2752 | (+) | STATAAAWRNNNNNN | AGATATAGATCCCCC |
|        |            | 0.77975 |      |     |                 |                 |
| M00252 | V\$TATA_01 | 1       | 2754 | (+) | STATAAAWRNNNNNN | ATATAGATCCCCCAG |
| M00252 | V\$TATA_01 | 0.77087 | 2831 | (+) | STATAAAWRNNNNNN | ACATAAATCTTGTC  |
|        |            | 0.77163 |      |     |                 |                 |
| M00252 | V\$TATA_01 | 2       | 2851 | (+) | STATAAAWRNNNNNN | GTAAAAATGCAGATT |
|        |            | 0.83390 |      |     |                 |                 |
| M00216 | V\$TATA_C  | 5       | 2876 | (+) | NCTATAAAAR      | TTTATATAAT      |
|        |            | 0.80715 |      |     |                 |                 |
| M00252 | V\$TATA_01 | 6       | 2877 | (+) | STATAAAWRNNNNNN | TTATATAATTTAATT |
|        |            | 0.79508 |      |     |                 |                 |
| M00216 | V\$TATA_C  | 8       | 2893 | (+) | NCTATAAAAR      | ATGATAAAAA      |

|        |            |                |      |     |                 |                 |
|--------|------------|----------------|------|-----|-----------------|-----------------|
| M00252 | V\$TATA_01 | 0.78152<br>8   | 2894 | (+) | STATAAAWRNNNNNN | TGATAAAAAATAAAA |
| M00216 | V\$TATA_C  | 0.76868<br>2   | 2900 | (+) | NCTATAAAAR      | AAAATAAAAT      |
| M00252 | V\$TATA_01 | 0.80664<br>8   | 2901 | (+) | STATAAAWRNNNNNN | AAATAAAATCCAGAC |
| M00216 | V\$TATA_C  | 0.74755<br>7   | 2963 | (+) | NCTATAAAAR      | ACTCTAGAAA      |
| M00216 | V\$TATA_C  | 0.74465<br>3   | 2965 | (+) | NCTATAAAAR      | TCTAGAAACA      |
| M00216 | V\$TATA_C  | 0.76868<br>2   | 3004 | (+) | NCTATAAAAR      | TCAATAAATT      |
| M00216 | V\$TATA_C  | 0.74016<br>4   | 3052 | (+) | NCTATAAAAR      | CTCTTAAATA      |
| M00252 | V\$TATA_01 | 0.78787<br>1   | 3053 | (+) | STATAAAWRNNNNNN | TCTTAAATACAACT  |
| M00216 | V\$TATA_C  | 0.74069<br>2   | 3067 | (+) | NCTATAAAAR      | TTCTTAAACA      |
| M00216 | V\$TATA_C  | 0.84209<br>1   | 3079 | (+) | NCTATAAAAR      | ACTATTAAAT      |
| M00252 | V\$TATA_01 | 0.78685<br>6   | 3080 | (+) | STATAAAWRNNNNNN | CTATTAAATGTATAA |
| M00216 | V\$TATA_C  | 0.81462<br>9   | 3088 | (+) | NCTATAAAAR      | TGTATAATAT      |
| M00252 | V\$TATA_01 | 0.81857<br>4   | 3089 | (+) | STATAAAWRNNNNNN | GTATAATATTACATG |
| M00216 | V\$TATA_C  | 0.77950<br>9   | 3167 | (+) | NCTATAAAAR      | TTTTTAACAG      |
| M00216 | V\$TATA_C  | 0.84209<br>1   | 3241 | (+) | NCTATAAAAR      | ACTATAAATT      |
| M00252 | V\$TATA_01 | 0.86475<br>5   | 3242 | (+) | STATAAAWRNNNNNN | CTATAAATTGTGTAG |
| M00252 | V\$TATA_01 | 0.78787<br>1   | 3266 | (+) | STATAAAWRNNNNNN | TGATAAATTGCTAAT |
| M00252 | V\$TATA_01 | 0.77822<br>9   | 3277 | (+) | STATAAAWRNNNNNN | TAATATATAGATTGT |
| M00252 | V\$TATA_01 | 0.81476<br>8   | 3279 | (+) | STATAAAWRNNNNNN | ATATATAGATTGTAG |
| M00216 | V\$TATA_C  | 0.75468<br>7   | 3308 | (+) | NCTATAAAAR      | TCTCTAGAAA      |
| M00216 | V\$TATA_C  | 0.84024<br>3   | 3310 | (+) | NCTATAAAAR      | TCTAGAAAAC      |
| M00252 | V\$TATA_01 | 0.78609<br>5   | 3311 | (+) | STATAAAWRNNNNNN | CTAGAAAACAGCCAG |
| M00216 | V\$TATA_C  | 0.80274<br>6   | 3341 | (+) | NCTATAAAAR      | GGTATAATAT      |
| M00252 | V\$TATA_01 | 0.80360<br>3   | 3421 | (+) | STATAAAWRNNNNNN | GTATTTATGATTAAT |
| M00216 | V\$TATA_C  | 0.83522<br>6   | 3431 | (+) | NCTATAAAAR      | TTAATAAAAA      |
| M00252 | V\$TATA_01 | 0.78025<br>9   | 3476 | (+) | STATAAAWRNNNNNN | ATATGTATATGTGGT |
| M00252 | V\$TATA_01 | 0.8102<br>3480 | 3480 | (+) | STATAAAWRNNNNNN | GTATATGTGGTCTAT |
| M00216 | V\$TATA_C  | 0.80749<br>9   | 3573 | (+) | NCTATAAAAR      | AGTATTAAAT      |
| M00252 | V\$TATA_01 | 0.83735<br>1   | 3574 | (+) | STATAAAWRNNNNNN | GTATTAAATTAGATA |
| M00216 | V\$TATA_C  | 0.78082<br>9   | 3601 | (+) | NCTATAAAAR      | CTTTTACAAG      |
| M00252 | V\$TATA_01 | 0.80715<br>6   | 3732 | (+) | STATAAAWRNNNNNN | TGATAAATACTGAAT |
| M00252 | V\$TATA_01 | 0.79446<br>8   | 3904 | (+) | STATAAAWRNNNNNN | TGATAAAGAAGGAAC |
| M00216 | V\$TATA_C  | 0.86559<br>3   | 3940 | (+) | NCTATAAAAR      | ATTTTAAAT       |

|        |            |         |      |     |                 |                  |
|--------|------------|---------|------|-----|-----------------|------------------|
|        |            | 0.77188 |      |     |                 |                  |
| M00252 | V\$TATA_01 | 5       | 3940 | (+) | STATAAAWRNNNNNN | ATTTTAAAAATAAAAT |
|        |            | 0.79040 |      |     |                 |                  |
| M00252 | V\$TATA_01 | 9       | 3941 | (+) | STATAAAWRNNNNNN | TTTTAAAAATAAAATC |
|        |            | 0.76868 |      |     |                 |                  |
| M00216 | V\$TATA_C  | 2       | 3945 | (+) | NCTATAAAAR      | AAAAATAAAAT      |
|        |            | 0.79091 |      |     |                 |                  |
| M00252 | V\$TATA_01 | 6       | 3946 | (+) | STATAAAWRNNNNNN | AAATAAAATCATAAA  |
|        |            | 0.85476 |      |     |                 |                  |
| M00216 | V\$TATA_C  | 6       | 3953 | (+) | NCTATAAAAR      | ATCATAAAAAC      |
|        |            | 0.80842 |      |     |                 |                  |
| M00252 | V\$TATA_01 | 4       | 3954 | (+) | STATAAAWRNNNNNN | TCATAAAACTGAAAC  |
|        |            |         |      |     |                 |                  |
| M00216 | V\$TATA_C  | 0.80169 | 4008 | (+) | NCTATAAAAR      | CCTAAATAAA       |
|        |            | 0.81984 |      |     |                 |                  |
| M00252 | V\$TATA_01 | 3       | 4009 | (+) | STATAAAWRNNNNNN | CTAAATAAATGGAGA  |
|        |            | 0.83938 |      |     |                 |                  |
| M00252 | V\$TATA_01 | 1       | 4011 | (+) | STATAAAWRNNNNNN | AAATAAATGGAGAAT  |
|        |            | 0.78381 |      |     |                 |                  |
| M00252 | V\$TATA_01 | 1       | 4030 | (+) | STATAAAWRNNNNNN | GTTCAAATGGAAAAA  |
|        |            | 0.75204 |      |     |                 |                  |
| M00216 | V\$TATA_C  | 6       | 4073 | (+) | NCTATAAAAR      | CTTTTACAAT       |
|        |            |         |      |     |                 |                  |
| M00216 | V\$TATA_C  | 0.78611 | 4110 | (+) | NCTATAAAAR      | TCAATGAAAA       |
|        |            | 0.75283 |      |     |                 |                  |
| M00216 | V\$TATA_C  | 9       | 4183 | (+) | NCTATAAAAR      | TCTGGAAAAA       |
|        |            | 0.78761 |      |     |                 |                  |
| M00252 | V\$TATA_01 | 7       | 4205 | (+) | STATAAAWRNNNNNN | TTATTTATAAATATT  |
|        |            | 0.78373 |      |     |                 |                  |
| M00216 | V\$TATA_C  | 4       | 4206 | (+) | NCTATAAAAR      | TATTTATAAA       |
|        |            | 0.78558 |      |     |                 |                  |
| M00252 | V\$TATA_01 | 7       | 4207 | (+) | STATAAAWRNNNNNN | ATTTATAAATATTTT  |
|        |            | 0.79376 |      |     |                 |                  |
| M00216 | V\$TATA_C  | 8       | 4208 | (+) | NCTATAAAAR      | TTTATAAATA       |
|        |            | 0.80867 |      |     |                 |                  |
| M00252 | V\$TATA_01 | 8       | 4209 | (+) | STATAAAWRNNNNNN | TTATAAATATTTTTT  |
|        |            | 0.87820 |      |     |                 |                  |
| M00252 | V\$TATA_01 | 4       | 4282 | (+) | STATAAAWRNNNNNN | TTATATATGCAAATA  |
|        |            | 0.74465 |      |     |                 |                  |
| M00216 | V\$TATA_C  | 3       | 4293 | (+) | NCTATAAAAR      | AATATTAAAA       |
|        |            | 0.80248 |      |     |                 |                  |
| M00216 | V\$TATA_C  | 2       | 4294 | (+) | NCTATAAAAR      | ATATTAAAAA       |
|        |            | 0.84800 |      |     |                 |                  |
| M00252 | V\$TATA_01 | 8       | 4294 | (+) | STATAAAWRNNNNNN | ATATTAAAAAGCTGC  |
|        |            | 0.76155 |      |     |                 |                  |
| M00216 | V\$TATA_C  | 3       | 4306 | (+) | NCTATAAAAR      | TGCTTTAAAT       |
|        |            | 0.82915 |      |     |                 |                  |
| M00216 | V\$TATA_C  | 2       | 4307 | (+) | NCTATAAAAR      | GCTTTAAATA       |
|        |            | 0.82923 |      |     |                 |                  |
| M00252 | V\$TATA_01 | 1       | 4308 | (+) | STATAAAWRNNNNNN | CTTTAAATATTAATC  |
|        |            | 0.81172 |      |     |                 |                  |
| M00252 | V\$TATA_01 | 3       | 4314 | (+) | STATAAAWRNNNNNN | ATATTAATCTGTACC  |
|        |            | 0.77660 |      |     |                 |                  |
| M00216 | V\$TATA_C  | 4       | 4341 | (+) | NCTATAAAAR      | TCTTTGTAAA       |
|        |            | 0.77554 |      |     |                 |                  |
| M00216 | V\$TATA_C  | 8       | 4343 | (+) | NCTATAAAAR      | TTTGTA AAC       |
|        |            | 0.80221 |      |     |                 |                  |
| M00216 | V\$TATA_C  | 8       | 4375 | (+) | NCTATAAAAR      | TCTATGTAAA       |
|        |            | 0.80116 |      |     |                 |                  |
| M00216 | V\$TATA_C  | 2       | 4384 | (+) | NCTATAAAAR      | ATTTTATAAT       |
|        |            | 0.76049 |      |     |                 |                  |
| M00216 | V\$TATA_C  | 6       | 4516 | (+) | NCTATAAAAR      | AGTATTTAAA       |
|        |            | 0.83075 |      |     |                 |                  |
| M00252 | V\$TATA_01 | 4       | 4517 | (+) | STATAAAWRNNNNNN | GTATTTAAAAGATTT  |
|        |            | 0.85951 |      |     |                 |                  |
| M00216 | V\$TATA_C  | 9       | 4518 | (+) | NCTATAAAAR      | TATTTAAAAG       |

|        |            |         |      |     |                 |                 |
|--------|------------|---------|------|-----|-----------------|-----------------|
|        |            | 0.79700 |      |     |                 |                 |
| M00252 | V\$TATA_01 | 6       | 4519 | (+) | STATAAAWRNNNNNN | ATTTAAAAGATTGTC |
|        |            | 0.75072 |      |     |                 |                 |
| M00216 | V\$TATA_C  | 6       | 4560 | (+) | NCTATAAAAR      | TTTTTAATAT      |
|        |            | 0.75336 |      |     |                 |                 |
| M00216 | V\$TATA_C  | 7       | 4563 | (+) | NCTATAAAAR      | TTAATATAAT      |
|        |            | 0.80829 |      |     |                 |                 |
| M00216 | V\$TATA_C  | 2       | 4601 | (+) | NCTATAAAAR      | TGTTTAGAAA      |
|        |            | 0.78000 |      |     |                 |                 |
| M00252 | V\$TATA_01 | 5       | 4602 | (+) | STATAAAWRNNNNNN | GTTTAGAAAGGTAAG |
|        |            | 0.75072 |      |     |                 |                 |
| M00216 | V\$TATA_C  | 6       | 4824 | (+) | NCTATAAAAR      | TTTTTTAAAT      |
|        |            | 0.76815 |      |     |                 |                 |
| M00216 | V\$TATA_C  | 4       | 4825 | (+) | NCTATAAAAR      | TTTTTAAATA      |
|        |            | 0.79269 |      |     |                 |                 |
| M00252 | V\$TATA_01 | 2       | 4834 | (+) | STATAAAWRNNNNNN | ATTTTAAAGTGCACA |
|        |            |         |      |     |                 |                 |
| M00252 | V\$TATA_01 | 0.79117 | 4836 | (+) | STATAAAWRNNNNNN | TTTAAAGTGCACAGT |
|        |            | 0.77185 |      |     |                 |                 |
| M00216 | V\$TATA_C  | 1       | 4863 | (+) | NCTATAAAAR      | AGCTTAAATA      |
|        |            | 0.80817 |      |     |                 |                 |
| M00252 | V\$TATA_01 | 1       | 4864 | (+) | STATAAAWRNNNNNN | GCTTAAATAAAGAAA |
|        |            | 0.77213 |      |     |                 |                 |
| M00252 | V\$TATA_01 | 9       | 4866 | (+) | STATAAAWRNNNNNN | TTAAATAAAGAAAAC |
|        |            | 0.76630 |      |     |                 |                 |
| M00216 | V\$TATA_C  | 6       | 4930 | (+) | NCTATAAAAR      | TTCACAAAAA      |
|        |            | 0.78279 |      |     |                 |                 |
| M00252 | V\$TATA_01 | 6       | 5067 | (+) | STATAAAWRNNNNNN | ACATAAATGATATTT |
|        |            |         |      |     |                 |                 |
| M00252 | V\$TATA_01 | 0.77087 | 5076 | (+) | STATAAAWRNNNNNN | ATATTTAAATTATTT |
|        |            | 0.74359 |      |     |                 |                 |
| M00216 | V\$TATA_C  | 7       | 5087 | (+) | NCTATAAAAR      | ATTTTAAAGT      |
|        |            | 0.78901 |      |     |                 |                 |
| M00216 | V\$TATA_C  | 5       | 5098 | (+) | NCTATAAAAR      | ACCTCAAAAT      |
|        |            | 0.79472 |      |     |                 |                 |
| M00252 | V\$TATA_01 | 2       | 5149 | (+) | STATAAAWRNNNNNN | ATTTTAAAGGGAAAA |
|        |            | 0.82492 |      |     |                 |                 |
| M00216 | V\$TATA_C  | 7       | 5237 | (+) | NCTATAAAAR      | AGTACAAAAA      |
|        |            | 0.81705 |      |     |                 |                 |
| M00252 | V\$TATA_01 | 2       | 5238 | (+) | STATAAAWRNNNNNN | GTACAAAAAACATTT |
|        |            | 0.76287 |      |     |                 |                 |
| M00216 | V\$TATA_C  | 3       | 5249 | (+) | NCTATAAAAR      | ATTTTAGAAA      |
|        |            | 0.79376 |      |     |                 |                 |
| M00216 | V\$TATA_C  | 8       | 5251 | (+) | NCTATAAAAR      | TTTAGAAAAA      |
|        |            | 0.74438 |      |     |                 |                 |
| M00216 | V\$TATA_C  | 9       | 5254 | (+) | NCTATAAAAR      | AGAAAAAAA       |
|        |            | 0.83390 |      |     |                 |                 |
| M00216 | V\$TATA_C  | 5       | 5292 | (+) | NCTATAAAAR      | ACTTTCAAAA      |
|        |            | 0.75019 |      |     |                 |                 |
| M00216 | V\$TATA_C  | 8       | 5293 | (+) | NCTATAAAAR      | CTTTCAAAAT      |
|        |            | 0.83628 |      |     |                 |                 |
| M00216 | V\$TATA_C  | 2       | 5380 | (+) | NCTATAAAAR      | AGTATAAATG      |
|        |            | 0.88556 |      |     |                 |                 |
| M00252 | V\$TATA_01 | 2       | 5381 | (+) | STATAAAWRNNNNNN | GTATAAATGAATGAA |
|        |            | 0.85186 |      |     |                 |                 |
| M00216 | V\$TATA_C  | 2       | 5396 | (+) | NCTATAAAAR      | TGGATAAAAG      |
|        |            | 0.82542 |      |     |                 |                 |
| M00252 | V\$TATA_01 | 5       | 5397 | (+) | STATAAAWRNNNNNN | GGATAAAGAATGAA  |
|        |            | 0.79508 |      |     |                 |                 |
| M00216 | V\$TATA_C  | 8       | 5480 | (+) | NCTATAAAAR      | ACTACATAAA      |
|        |            | 0.84927 |      |     |                 |                 |
| M00252 | V\$TATA_01 | 7       | 5481 | (+) | STATAAAWRNNNNNN | CTACATAAAGCAATA |
|        |            | 0.78990 |      |     |                 |                 |
| M00252 | V\$TATA_01 | 1       | 5491 | (+) | STATAAAWRNNNNNN | CAATATATCTGCTCC |
|        |            | 0.77950 |      |     |                 |                 |
| M00216 | V\$TATA_C  | 9       | 5540 | (+) | NCTATAAAAR      | TTTTTCAAAG      |

|        |            |         |      |     |                 |                 |
|--------|------------|---------|------|-----|-----------------|-----------------|
|        |            | 0.76762 |      |     |                 |                 |
| M00216 | V\$TATA_C  | 6       | 5549 | (+) | NCTATAAAAR      | GTTTAAATAG      |
|        |            | 0.80969 |      |     |                 |                 |
| M00252 | V\$TATA_01 | 3       | 5549 | (+) | STATAAAWRNNNNNN | GTTTAAATAGCTTTG |
|        |            | 0.78188 |      |     |                 |                 |
| M00216 | V\$TATA_C  | 5       | 5563 | (+) | NCTATAAAAR      | GTTATTAAAA      |
|        |            | 0.80961 |      |     |                 |                 |
| M00216 | V\$TATA_C  | 2       | 5564 | (+) | NCTATAAAAR      | TTATTAAAAA      |
|        |            | 0.82517 |      |     |                 |                 |
| M00252 | V\$TATA_01 | 1       | 5564 | (+) | STATAAAWRNNNNNN | TTATTAAAAAAAACA |
|        |            | 0.78663 |      |     |                 |                 |
| M00216 | V\$TATA_C  | 9       | 5566 | (+) | NCTATAAAAR      | ATTAAAAAAA      |
|        |            | 0.75574 |      |     |                 |                 |
| M00216 | V\$TATA_C  | 3       | 5583 | (+) | NCTATAAAAR      | GGTATTTAAA      |
|        |            | 0.82821 |      |     |                 |                 |
| M00252 | V\$TATA_01 | 6       | 5584 | (+) | STATAAAWRNNNNNN | GTATTTAAAAAACAT |
|        |            | 0.84816 |      |     |                 |                 |
| M00216 | V\$TATA_C  | 5       | 5585 | (+) | NCTATAAAAR      | TATTTAAAAA      |
|        |            | 0.76102 |      |     |                 |                 |
| M00216 | V\$TATA_C  | 5       | 5586 | (+) | NCTATAAAAR      | ATTTAAAAAA      |
|        |            | 0.82212 |      |     |                 |                 |
| M00252 | V\$TATA_01 | 6       | 5586 | (+) | STATAAAWRNNNNNN | ATTTAAAAAACATAC |
|        |            | 0.76736 |      |     |                 |                 |
| M00216 | V\$TATA_C  | 2       | 5587 | (+) | NCTATAAAAR      | TTTAAAAAAC      |
|        |            | 0.75574 |      |     |                 |                 |
| M00216 | V\$TATA_C  | 3       | 5602 | (+) | NCTATAAAAR      | GGTATTTAAA      |
|        |            | 0.81045 |      |     |                 |                 |
| M00252 | V\$TATA_01 | 4       | 5603 | (+) | STATAAAWRNNNNNN | GTATTTAAAAATTTA |
|        |            | 0.84816 |      |     |                 |                 |
| M00216 | V\$TATA_C  | 5       | 5604 | (+) | NCTATAAAAR      | TATTTAAAAA      |
|        |            | 0.74359 |      |     |                 |                 |
| M00216 | V\$TATA_C  | 7       | 5605 | (+) | NCTATAAAAR      | ATTTAAAAAT      |
|        |            |         |      |     |                 |                 |
| M00252 | V\$TATA_01 | 0.81223 | 5605 | (+) | STATAAAWRNNNNNN | ATTTAAAAATTACA  |
|        |            | 0.85661 |      |     |                 |                 |
| M00216 | V\$TATA_C  | 5       | 5702 | (+) | NCTATAAAAR      | ATTTTAAAAAC     |
|        |            | 0.84209 |      |     |                 |                 |
| M00216 | V\$TATA_C  | 1       | 5710 | (+) | NCTATAAAAR      | ACTATTAAAT      |
|        |            | 0.79700 |      |     |                 |                 |
| M00252 | V\$TATA_01 | 6       | 5711 | (+) | STATAAAWRNNNNNN | CTATTAAATATAATA |
|        |            | 0.74623 |      |     |                 |                 |
| M00216 | V\$TATA_C  | 7       | 5720 | (+) | NCTATAAAAR      | ATAATATAAT      |
|        |            | 0.78660 |      |     |                 |                 |
| M00252 | V\$TATA_01 | 2       | 5721 | (+) | STATAAAWRNNNNNN | TAATATAATGAAAAG |
|        |            | 0.80749 |      |     |                 |                 |
| M00216 | V\$TATA_C  | 9       | 5741 | (+) | NCTATAAAAR      | AGTAAAAAAT      |
|        |            | 0.74887 |      |     |                 |                 |
| M00216 | V\$TATA_C  | 8       | 5814 | (+) | NCTATAAAAR      | ACTAAACAG       |
|        |            | 0.75574 |      |     |                 |                 |
| M00216 | V\$TATA_C  | 3       | 5839 | (+) | NCTATAAAAR      | AGAAAAAAAG      |
|        |            | 0.75442 |      |     |                 |                 |
| M00216 | V\$TATA_C  | 3       | 5906 | (+) | NCTATAAAAR      | AGCTTAAATT      |
|        |            | 0.77898 |      |     |                 |                 |
| M00216 | V\$TATA_C  | 1       | 5996 | (+) | NCTATAAAAR      | TGCTTAAATA      |
|        |            | 0.79294 |      |     |                 |                 |
| M00252 | V\$TATA_01 | 6       | 6003 | (+) | STATAAAWRNNNNNN | ATATTTATACATTAT |
|        |            | 0.75574 |      |     |                 |                 |
| M00216 | V\$TATA_C  | 3       | 6099 | (+) | NCTATAAAAR      | AGAAAAAAAG      |
|        |            | 0.79376 |      |     |                 |                 |
| M00216 | V\$TATA_C  | 8       | 6151 | (+) | NCTATAAAAR      | TTTATCAAAA      |
|        |            | 0.77475 |      |     |                 |                 |
| M00216 | V\$TATA_C  | 6       | 6159 | (+) | NCTATAAAAR      | AACATATAAA      |
|        |            | 0.80563 |      |     |                 |                 |
| M00252 | V\$TATA_01 | 3       | 6160 | (+) | STATAAAWRNNNNNN | ACATATAAAAATCTA |
|        |            | 0.87325 |      |     |                 |                 |
| M00216 | V\$TATA_C  | 1       | 6161 | (+) | NCTATAAAAR      | CATATAAAAA      |

|        |            |         |      |     |                  |                  |
|--------|------------|---------|------|-----|------------------|------------------|
|        |            | 0.90560 |      |     |                  |                  |
| M00252 | V\$TATA_01 | 8       | 6162 | (+) | STATAAAWRNNNNNNN | ATATAAAAATCTACA  |
|        |            | 0.78457 |      |     |                  |                  |
| M00252 | V\$TATA_01 | 2       | 6203 | (+) | STATAAAWRNNNNNNN | AGATTAAAGAGGAAA  |
|        |            | 0.77746 |      |     |                  |                  |
| M00252 | V\$TATA_01 | 8       | 6204 | (+) | STATAAAWRNNNNNNN | GATTAAAGAGGAAAA  |
|        |            | 0.76815 |      |     |                  |                  |
| M00216 | V\$TATA_C  | 4       | 6245 | (+) | NCTATAAAAR       | TTTTTTAAAA       |
|        |            | 0.87272 |      |     |                  |                  |
| M00216 | V\$TATA_C  | 2       | 6246 | (+) | NCTATAAAAR       | TTTTTAAAT        |
|        |            | 0.81324 |      |     |                  |                  |
| M00252 | V\$TATA_01 | 5       | 6326 | (+) | STATAAAWRNNNNNNN | TTTATATTGGAATG   |
|        |            | 0.75442 |      |     |                  |                  |
| M00216 | V\$TATA_C  | 3       | 6344 | (+) | NCTATAAAAR       | GTCATGAAAA       |
|        |            | 0.76049 |      |     |                  |                  |
| M00216 | V\$TATA_C  | 6       | 6345 | (+) | NCTATAAAAR       | TCATGAAAAA       |
|        |            | 0.76102 |      |     |                  |                  |
| M00216 | V\$TATA_C  | 5       | 6418 | (+) | NCTATAAAAR       | ATTTTAATAA       |
|        |            | 0.80563 |      |     |                  |                  |
| M00252 | V\$TATA_01 | 3       | 6437 | (+) | STATAAAWRNNNNNNN | TTATATATCATAAAC  |
|        |            | 0.75917 |      |     |                  |                  |
| M00216 | V\$TATA_C  | 6       | 6443 | (+) | NCTATAAAAR       | ATCATAAACA       |
|        |            | 0.82915 |      |     |                  |                  |
| M00216 | V\$TATA_C  | 2       | 6466 | (+) | NCTATAAAAR       | GCTTTAAGAA       |
|        |            |         |      |     |                  |                  |
| M00252 | V\$TATA_01 | 0.77696 | 6467 | (+) | STATAAAWRNNNNNNN | CTTTAAGAAAGCTAT  |
|        |            | 0.76287 |      |     |                  |                  |
| M00216 | V\$TATA_C  | 3       | 6547 | (+) | NCTATAAAAR       | GCCAGATAAA       |
|        |            | 0.77660 |      |     |                  |                  |
| M00216 | V\$TATA_C  | 4       | 6604 | (+) | NCTATAAAAR       | TCTTTATTAA       |
|        |            | 0.79376 |      |     |                  |                  |
| M00216 | V\$TATA_C  | 8       | 6606 | (+) | NCTATAAAAR       | TTTATTAAAA       |
|        |            | 0.79218 |      |     |                  |                  |
| M00216 | V\$TATA_C  | 4       | 6607 | (+) | NCTATAAAAR       | TTATTAAAT        |
|        |            | 0.84521 |      |     |                  |                  |
| M00252 | V\$TATA_01 | 7       | 6607 | (+) | STATAAAWRNNNNNNN | TTATTAAAAATCAAGA |
|        |            | 0.75257 |      |     |                  |                  |
| M00216 | V\$TATA_C  | 5       | 6619 | (+) | NCTATAAAAR       | AGAGTAAAAA       |
|        |            | 0.92843 |      |     |                  |                  |
| M00216 | V\$TATA_C  | 9       | 6645 | (+) | NCTATAAAAR       | TGTTTAAAAA       |
|        |            |         |      |     |                  |                  |
| M00252 | V\$TATA_01 | 0.87998 | 6646 | (+) | STATAAAWRNNNNNNN | GTTTAAAAATGAACA  |
|        |            | 0.74570 |      |     |                  |                  |
| M00216 | V\$TATA_C  | 9       | 6665 | (+) | NCTATAAAAR       | ACTCAAAAAA       |
|        |            |         |      |     |                  |                  |
| M00216 | V\$TATA_C  | 0.74835 | 6666 | (+) | NCTATAAAAR       | CTCAAAAAAT       |
|        |            | 0.79015 |      |     |                  |                  |
| M00252 | V\$TATA_01 | 5       | 6672 | (+) | STATAAAWRNNNNNNN | AAATTAAAACCCTGT  |
|        |            | 0.77924 |      |     |                  |                  |
| M00252 | V\$TATA_01 | 4       | 6700 | (+) | STATAAAWRNNNNNNN | GGATAAGAGTTCACT  |
|        |            | 0.75336 |      |     |                  |                  |
| M00216 | V\$TATA_C  | 7       | 7250 | (+) | NCTATAAAAR       | ACATGAAAAA       |
|        |            | 0.75151 |      |     |                  |                  |
| M00216 | V\$TATA_C  | 8       | 7316 | (+) | NCTATAAAAR       | TGCATATTAG       |
|        |            |         |      |     |                  |                  |
| M00252 | V\$TATA_01 | 0.78102 | 7319 | (+) | STATAAAWRNNNNNNN | ATATTAGAATCAATA  |
|        |            | 0.77848 |      |     |                  |                  |
| M00252 | V\$TATA_01 | 3       | 7366 | (+) | STATAAAWRNNNNNNN | CCATATGTAAATATG  |
|        |            | 0.79142 |      |     |                  |                  |
| M00252 | V\$TATA_01 | 3       | 7370 | (+) | STATAAAWRNNNNNNN | ATGTAAATATGAACA  |
|        |            | 0.79776 |      |     |                  |                  |
| M00252 | V\$TATA_01 | 7       | 7372 | (+) | STATAAAWRNNNNNNN | GTAAATATGAACATC  |
|        |            | 0.81779 |      |     |                  |                  |
| M00216 | V\$TATA_C  | 8       | 7410 | (+) | NCTATAAAAR       | TGTTTCAAAG       |
|        |            | 0.83390 |      |     |                  |                  |
| M00216 | V\$TATA_C  | 5       | 7426 | (+) | NCTATAAAAR       | ACTTTTAAAA       |

|        |            |                 |      |     |                 |                 |
|--------|------------|-----------------|------|-----|-----------------|-----------------|
| M00216 | V\$TATA_C  | 0.90097<br>7    | 7427 | (+) | NCTATAAAAR      | CTTTTAAAAG      |
| M00252 | V\$TATA_01 | 0.80537<br>9    | 7427 | (+) | STATAAAWRNNNNNN | CTTTTAAAAGCTCAT |
| M00252 | V\$TATA_01 | 0.84775<br>4    | 7428 | (+) | STATAAAWRNNNNNN | TTTTAAAAGCTCATG |
| M00216 | V\$TATA_C  | 0.80195<br>4    | 7526 | (+) | NCTATAAAAR      | AGAATATAAA      |
| M00252 | V\$TATA_01 | 0.84217<br>2    | 7527 | (+) | STATAAAWRNNNNNN | GAATATAAACTCAAC |
| M00252 | V\$TATA_01 | 0.78431<br>9    | 7529 | (+) | STATAAAWRNNNNNN | ATATAAACTCAACCC |
| M00216 | V\$TATA_C  | 0.75627<br>1    | 7649 | (+) | NCTATAAAAR      | GTTTTAATAA      |
| M00252 | V\$TATA_01 | 0.82339<br>5    | 7649 | (+) | STATAAAWRNNNNNN | GTTTTAATAAAAAGG |
| M00216 | V\$TATA_C  | 0.83522<br>6    | 7652 | (+) | NCTATAAAAR      | TTAATAAAAA      |
| M00252 | V\$TATA_01 | 0.79852<br>8    | 7653 | (+) | STATAAAWRNNNNNN | TAATAAAAAGGTTTT |
| M00216 | V\$TATA_C  | 0.76102<br>5    | 7707 | (+) | NCTATAAAAR      | ATTTTAAATA      |
| M00252 | V\$TATA_01 | 0.79751<br>3    | 7708 | (+) | STATAAAWRNNNNNN | TTTTAAATAAAATTG |
| M00216 | V\$TATA_C  | 0.77581<br>2    | 7711 | (+) | NCTATAAAAR      | TAAATAAAAT      |
| M00252 | V\$TATA_01 | 0.77264<br>7    | 7712 | (+) | STATAAAWRNNNNNN | AAATAAAATTGACAA |
| M00216 | V\$TATA_C  | 0.83918<br>7    | 7727 | (+) | NCTATAAAAR      | TCCAAAAAAA      |
| M00216 | V\$TATA_C  | 0.78558<br>2    | 7728 | (+) | NCTATAAAAR      | CCAAAAAAA       |
| M00252 | V\$TATA_01 | 0.81603<br>7    | 7760 | (+) | STATAAAWRNNNNNN | CTTTTATACCCAAT  |
| M00216 | V\$TATA_C  | 0.79429<br>6    | 7780 | (+) | NCTATAAAAR      | TCACTAAAAA      |
| M00216 | V\$TATA_C  | 0.83628<br>2    | 7804 | (+) | NCTATAAAAR      | AGTATGAAAG      |
| M00252 | V\$TATA_01 | 0.82872<br>4    | 7805 | (+) | STATAAAWRNNNNNN | GTATGAAAGTGTGGA |
| M00216 | V\$TATA_C  | 0.80617<br>9    | 7834 | (+) | NCTATAAAAR      | ATTCTAAAAG      |
| M00216 | V\$TATA_C  | 0.76921<br>7945 | 7945 | (+) | NCTATAAAAR      | ATTAGAAAAT      |
| M00216 | V\$TATA_C  | 0.74201<br>2    | 7954 | (+) | NCTATAAAAR      | TGTTTATGAA      |
| M00252 | V\$TATA_01 | 0.77188<br>5    | 7955 | (+) | STATAAAWRNNNNNN | GTTTATGAAAGTTTG |
| M00216 | V\$TATA_C  | 0.80512<br>3    | 7956 | (+) | NCTATAAAAR      | TTTATGAAAG      |
| M00216 | V\$TATA_C  | 0.81462<br>9    | 7974 | (+) | NCTATAAAAR      | ACCATAAAGT      |
| M00216 | V\$TATA_C  | 0.75019<br>8    | 8021 | (+) | NCTATAAAAR      | TGTATCTAAT      |
| M00216 | V\$TATA_C  | 0.74359<br>7    | 8039 | (+) | NCTATAAAAR      | ATTTTAACAT      |
| M00252 | V\$TATA_01 | 0.80106<br>6    | 8250 | (+) | STATAAAWRNNNNNN | AAATATAAACATGAT |
| M00216 | V\$TATA_C  | 0.74465<br>3    | 8251 | (+) | NCTATAAAAR      | AATATAAACA      |
| M00252 | V\$TATA_01 | 0.77670<br>6    | 8252 | (+) | STATAAAWRNNNNNN | ATATAAACATGATAT |
| M00252 | V\$TATA_01 | 0.78076<br>6    | 8336 | (+) | STATAAAWRNNNNNN | GGAGAAAAAGAGAAG |
| M00216 | V\$TATA_C  | 0.79456<br>8350 | 8350 | (+) | NCTATAAAAR      | GGCATACAAA      |



|        |            |                    |      |     |                  |                 |
|--------|------------|--------------------|------|-----|------------------|-----------------|
| M00252 | V\$TATA_01 | 0.78076<br>6       | 8351 | (+) | STATAAAWRNNNNNNN | GCATACAAAGTGATG |
| M00216 | V\$TATA_C  | 0.79614<br>5       | 8369 | (+) | NCTATAAAAR       | TCCTTAAACT      |
| M00216 | V\$TATA_C  | 0.80116<br>2       | 8399 | (+) | NCTATAAAAR       | AGTTTACAAA      |
| M00216 | V\$TATA_C  | 0.77634<br>0.74544 | 8401 | (+) | NCTATAAAAR       | TTTACAAAAT      |
| M00216 | V\$TATA_C  | 0.77848<br>5       | 8431 | (+) | NCTATAAAAR       | CAGTTAAAAG      |
| M00252 | V\$TATA_01 | 0.85001<br>3       | 8432 | (+) | STATAAAWRNNNNNNN | AGTTAAAAGTGAATT |
| M00216 | V\$TATA_C  | 0.77645<br>3       | 8631 | (+) | NCTATAAAAR       | GTCATAAAAC      |
| M00252 | V\$TATA_01 | 0.77188<br>3       | 8632 | (+) | STATAAAWRNNNNNNN | TCATAAAACTAACAA |
| M00252 | V\$TATA_01 | 0.82360<br>5       | 8657 | (+) | STATAAAWRNNNNNNN | TTTTTTAAGGAAATT |
| M00216 | V\$TATA_C  | 0.77594<br>7       | 8707 | (+) | NCTATAAAAR       | AATTTAAAAT      |
| M00252 | V\$TATA_01 | 0.78305<br>5       | 8713 | (+) | STATAAAWRNNNNNNN | AAATATATTAACATC |
| M00216 | V\$TATA_C  | 0.75336<br>7       | 8787 | (+) | NCTATAAAAR       | ATATATTAACATCAT |
| M00216 | V\$TATA_C  | 0.79376<br>8       | 8841 | (+) | NCTATAAAAR       | ACATTCAAAA      |
| M00216 | V\$TATA_C  | 0.82096<br>6       | 8842 | (+) | NCTATAAAAR       | TTTATTAAAA      |
| M00252 | V\$TATA_01 | 0.80715<br>6       | 8842 | (+) | STATAAAWRNNNNNNN | TTATTAAAAAG     |
| M00216 | V\$TATA_C  | 0.74201<br>2       | 8894 | (+) | NCTATAAAAR       | TTATTAAAAGTTAAT |
| M00216 | V\$TATA_C  | 0.79614<br>5       | 8977 | (+) | NCTATAAAAR       | TGTTGATAAA      |
| M00216 | V\$TATA_C  | 0.75970<br>4       | 8982 | (+) | NCTATAAAAR       | TCCTGAAAAT      |
| M00252 | V\$TATA_01 | 0.77949<br>8       | 8983 | (+) | STATAAAWRNNNNNNN | AAAATAAAAC      |
| M00252 | V\$TATA_01 | 0.77137<br>8       | 9013 | (+) | STATAAAWRNNNNNNN | AAATAAAACTGACAA |
| M00252 | V\$TATA_01 | 0.78000<br>5       | 9046 | (+) | STATAAAWRNNNNNNN | ATATTTAATTCATAC |
| M00216 | V\$TATA_C  | 0.75019<br>8       | 9181 | (+) | NCTATAAAAR       | GTATTATAGTCTACT |
| M00252 | V\$TATA_01 | 0.78660<br>2       | 9182 | (+) | STATAAAWRNNNNNNN | AATTTATAAC      |
| M00252 | V\$TATA_01 | 0.83633<br>6       | 9220 | (+) | STATAAAWRNNNNNNN | ATTTATAACTTAAGT |
| M00216 | V\$TATA_C  | 0.85503<br>0.89292 | 9227 | (+) | NCTATAAAAR       | ATATTTAAGCATATA |
| M00252 | V\$TATA_01 | 0.78558<br>1       | 9228 | (+) | STATAAAWRNNNNNNN | AGCATATAAA      |
| M00252 | V\$TATA_01 | 0.84658<br>7       | 9230 | (+) | STATAAAWRNNNNNNN | GCATATAAAGCAATT |
| M00216 | V\$TATA_C  | 0.81172<br>3       | 9241 | (+) | NCTATAAAAR       | ATATAAAGCAATTAA |
| M00252 | V\$TATA_01 | 0.78305<br>0.79746 | 9242 | (+) | STATAAAWRNNNNNNN | TTAATAAAAG      |
| M00216 | V\$TATA_C  | 0.78863<br>5       | 9242 | (+) | STATAAAWRNNNNNNN | TAATAAAAGCAAGAC |
| M00252 | V\$TATA_01 | 0.78863<br>2       | 9594 | (+) | STATAAAWRNNNNNNN | TGATATAATGCACAC |
| M00216 | V\$TATA_C  | 0.78863<br>5       | 9861 | (+) | NCTATAAAAR       | TCAACAAAAG      |
| M00252 | V\$TATA_01 | 0.78863<br>2       | 9921 | (+) | STATAAAWRNNNNNNN | TTATTATATCTGAC  |

|        |            |                    |       |     |                 |                 |
|--------|------------|--------------------|-------|-----|-----------------|-----------------|
| M00252 | V\$TATA_01 | 0.79726<br>0.78875 | 9923  | (+) | STATAAAWRNNNNNN | ATTTATATCTGACTG |
| M00216 | V\$TATA_C  | 1                  | 9937  | (+) | NCTATAAAAR      | GCATTATAAT      |
| M00216 | V\$TATA_C  | 0.76921<br>0.79931 | 9939  | (+) | NCTATAAAAR      | ATTATAATAT      |
| M00216 | V\$TATA_C  | 3<br>0.78188       | 9955  | (+) | NCTATAAAAR      | AGTTAAAAAA      |
| M00216 | V\$TATA_C  | 5<br>0.76815       | 9956  | (+) | NCTATAAAAR      | GTAAAAAA        |
| M00216 | V\$TATA_C  | 4<br>0.89015       | 9992  | (+) | NCTATAAAAR      | TTTTTTAAAA      |
| M00216 | V\$TATA_C  | 1<br>0.76815       | 9993  | (+) | NCTATAAAAR      | TTTTTAAAAA      |
| M00216 | V\$TATA_C  | 4<br>0.82745       | 9994  | (+) | NCTATAAAAR      | TTTTAAAAAA      |
| M00252 | V\$TATA_01 | 5<br>0.79376       | 9994  | (+) | STATAAAWRNNNNNN | TTTTAAAAAAAGAAT |
| M00216 | V\$TATA_C  | 8<br>0.79243       | 9995  | (+) | NCTATAAAAR      | TTTAAAAAA       |
| M00252 | V\$TATA_01 | 8<br>0.74570       | 10138 | (+) | STATAAAWRNNNNNN | CTTTGAATAGGAACA |
| M00216 | V\$TATA_C  | 9<br>0.78663       | 10162 | (+) | NCTATAAAAR      | ACTGAAAAAA      |
| M00216 | V\$TATA_C  | 9                  | 10200 | (+) | NCTATAAAAR      | ATTATAATAA      |
| M00252 | V\$TATA_01 | 0.77087<br>0.76366 | 10201 | (+) | STATAAAWRNNNNNN | TTATAATAATATAAA |
| M00216 | V\$TATA_C  | 5<br>0.84922       | 10206 | (+) | NCTATAAAAR      | ATAATATAAA      |
| M00216 | V\$TATA_C  | 1<br>0.85206       | 10208 | (+) | NCTATAAAAR      | AATATAAAAT      |
| M00252 | V\$TATA_01 | 8<br>0.74438       | 10209 | (+) | STATAAAWRNNNNNN | ATATAAAATTAAGTC |
| M00216 | V\$TATA_C  | 9<br>0.78330       | 10227 | (+) | NCTATAAAAR      | AGAATTAAAA      |
| M00252 | V\$TATA_01 | 4<br>0.76287       | 10325 | (+) | STATAAAWRNNNNNN | GTATTTATTTCCCA  |
| M00216 | V\$TATA_C  | 3<br>0.77475       | 10398 | (+) | NCTATAAAAR      | GCCAAATAAA      |
| M00216 | V\$TATA_C  | 6<br>0.75996       | 10411 | (+) | NCTATAAAAR      | TCCATTTAAA      |
| M00216 | V\$TATA_C  | 8<br>0.84763       | 10412 | (+) | NCTATAAAAR      | CCATTTAAAA      |
| M00216 | V\$TATA_C  | 7<br>0.76102       | 10413 | (+) | NCTATAAAAR      | CATTTAAAAA      |
| M00216 | V\$TATA_C  | 5<br>0.86627       | 10414 | (+) | NCTATAAAAR      | ATTTAAAAAA      |
| M00252 | V\$TATA_01 | 8<br>0.76736       | 10414 | (+) | STATAAAWRNNNNNN | ATTTAAAAACAATG  |
| M00216 | V\$TATA_C  | 2<br>0.76630       | 10415 | (+) | NCTATAAAAR      | TTTAAAAAAC      |
| M00216 | V\$TATA_C  | 6<br>0.74306       | 10474 | (+) | NCTATAAAAR      | TTCATCAAAA      |
| M00216 | V\$TATA_C  | 8<br>0.75600       | 10475 | (+) | NCTATAAAAR      | TCATCAAAAT      |
| M00216 | V\$TATA_C  | 7<br>0.75864       | 10487 | (+) | NCTATAAAAR      | TCTAAGAAAG      |
| M00216 | V\$TATA_C  | 8<br>0.89015       | 10538 | (+) | NCTATAAAAR      | CCTTTATAGT      |
| M00216 | V\$TATA_C  | 1<br>0.77416       | 10630 | (+) | NCTATAAAAR      | CCAATAAAAT      |
| M00252 | V\$TATA_01 | 9<br>0.80644       | 10631 | (+) | STATAAAWRNNNNNN | CAATAAAATGTTCAA |
| M00216 | V\$TATA_C  | 3                  | 10639 | (+) | NCTATAAAAR      | TGTTCAAAAA      |

|        |            |         |       |                 |                 |                 |
|--------|------------|---------|-------|-----------------|-----------------|-----------------|
|        |            | 0.74887 |       |                 |                 |                 |
| M00216 | V\$TATA_C  | 8       | 10641 | (+)             | NCTATAAAAR      | TTCAAAAAAT      |
|        |            | 0.80327 |       |                 |                 |                 |
| M00216 | V\$TATA_C  | 4       | 10673 | (+)             | NCTATAAAAR      | ACTCTATAAA      |
|        |            | 0.97121 |       |                 |                 |                 |
| M00216 | V\$TATA_C  | 7       | 10675 | (+)             | NCTATAAAAR      | TCTATAAAAT      |
|        |            | 0.85282 |       |                 |                 |                 |
| M00252 | V\$TATA_01 | 9       | 10676 | (+)             | STATAAAWRNNNNNN | CTATAAAATTTGCTA |
|        |            | 0.85001 |       |                 |                 |                 |
| M00216 | V\$TATA_C  | 3       | 10793 | (+)             | NCTATAAAAR      | GTCATAAAAC      |
|        |            | 0.77188 |       |                 |                 |                 |
| M00252 | V\$TATA_01 | 5       | 10823 | (+)             | STATAAAWRNNNNNN | TTTTTTAAGGAAATT |
|        |            | 0.77543 |       |                 |                 |                 |
| M00252 | V\$TATA_01 | 8       | 10861 | (+)             | STATAAAWRNNNNNN | ATATATTTACTAAAT |
|        |            | 0.82360 |       |                 |                 |                 |
| M00216 | V\$TATA_C  | 7       | 10873 | (+)             | NCTATAAAAR      | AATTTAAAT       |
|        |            | 0.82263 |       |                 |                 |                 |
| M00252 | V\$TATA_01 | 4       | 10883 | (+)             | STATAAAWRNNNNNN | ATATTAAATGCACTA |
|        |            | 0.84209 |       |                 |                 |                 |
| M00216 | V\$TATA_C  | 1       | 10894 | (+)             | NCTATAAAAR      | ACTATAAGAT      |
|        |            | 0.80537 |       |                 |                 |                 |
| M00252 | V\$TATA_01 | 9       | 10895 | (+)             | STATAAAWRNNNNNN | CTATAAGATGTGCAT |
|        |            | 0.77053 |       |                 |                 |                 |
| M00216 | V\$TATA_C  | 1       | 10953 | (+)             | NCTATAAAAR      | ATCAAAAAAG      |
|        |            | 0.80987 |       |                 |                 |                 |
| M00216 | V\$TATA_C  | 6       | 11035 | (+)             | NCTATAAAAR      | GCCATAAATT      |
|        |            | 0.77340 |       |                 |                 |                 |
| M00252 | V\$TATA_01 | 8       | 11036 | (+)             | STATAAAWRNNNNNN | CCATAAATTTTTGTT |
|        |            | 0.77898 |       |                 |                 |                 |
| M00216 | V\$TATA_C  | 1       | 11059 | (+)             | NCTATAAAAR      | ACCAAATAAG      |
|        |            | 0.76287 |       |                 |                 |                 |
| M00216 | V\$TATA_C  | 3       | 11245 | (+)             | NCTATAAAAR      | GCCAAATAAA      |
|        |            | 0.78406 |       |                 |                 |                 |
| M00252 | V\$TATA_01 | 5       | 11248 | (+)             | STATAAAWRNNNNNN | AAATAAATTTAGATA |
|        |            | 0.78914 |       |                 |                 |                 |
| M00252 | V\$TATA_01 | 11258   | (+)   | STATAAAWRNNNNNN | AGATATATCAGTACC |                 |
|        |            | 0.77797 |       |                 |                 |                 |
| M00252 | V\$TATA_01 | 5       | 11260 | (+)             | STATAAAWRNNNNNN | ATATATCAGTACCTC |
|        |            | 0.76868 |       |                 |                 |                 |
| M00216 | V\$TATA_C  | 2       | 11273 | (+)             | NCTATAAAAR      | TCAATCAAAT      |
|        |            | 0.77873 |       |                 |                 |                 |
| M00252 | V\$TATA_01 | 6       | 11316 | (+)             | STATAAAWRNNNNNN | ATATATTTTAGCACC |
|        |            | 0.78203 |       |                 |                 |                 |
| M00252 | V\$TATA_01 | 5       | 11375 | (+)             | STATAAAWRNNNNNN | CTATATGGTCCTGCT |
|        |            | 0.76287 |       |                 |                 |                 |
| M00216 | V\$TATA_C  | 3       | 11482 | (+)             | NCTATAAAAR      | TGAATGAAAG      |
|        |            | 0.74227 |       |                 |                 |                 |
| M00216 | V\$TATA_C  | 6       | 11520 | (+)             | NCTATAAAAR      | TGAGTAAAT       |
|        |            | 0.79294 |       |                 |                 |                 |
| M00252 | V\$TATA_01 | 6       | 11540 | (+)             | STATAAAWRNNNNNN | AGATAAAGAGATCTC |
|        |            | 0.90097 |       |                 |                 |                 |
| M00216 | V\$TATA_C  | 7       | 11578 | (+)             | NCTATAAAAR      | ACCATATAAG      |
|        |            | 0.85359 |       |                 |                 |                 |
| M00252 | V\$TATA_01 | 11579   | (+)   | STATAAAWRNNNNNN | CCATATAAGACTATT |                 |
|        |            | 0.80829 |       |                 |                 |                 |
| M00216 | V\$TATA_C  | 2       | 11634 | (+)             | NCTATAAAAR      | TTTTTATAAT      |
|        |            | 0.77087 |       |                 |                 |                 |
| M00252 | V\$TATA_01 | 11635   | (+)   | STATAAAWRNNNNNN | TTTTATAATGTGTGT |                 |
|        |            | 0.77950 |       |                 |                 |                 |
| M00216 | V\$TATA_C  | 9       | 11660 | (+)             | NCTATAAAAR      | TTTTTAACAG      |
|        |            | 0.79117 |       |                 |                 |                 |
| M00252 | V\$TATA_01 | 11670   | (+)   | STATAAAWRNNNNNN | AAATAAATAAAATCC |                 |
|        |            | 0.77581 |       |                 |                 |                 |
| M00216 | V\$TATA_C  | 2       | 11673 | (+)             | NCTATAAAAR      | TAAATAAAT       |
|        |            | 0.84775 |       |                 |                 |                 |
| M00252 | V\$TATA_01 | 4       | 11674 | (+)             | STATAAAWRNNNNNN | AAATAAAATCCAAGG |

|        |            |                    |       |                  |                  |                  |
|--------|------------|--------------------|-------|------------------|------------------|------------------|
| M00216 | V\$TATA_C  | 0.83073<br>7       | 11725 | (+)              | NCTATAAAAR       | TATTTAAAAT       |
| M00216 | V\$TATA_C  | 0.77660<br>4       | 11732 | (+)              | NCTATAAAAR       | AATTTATAAA       |
| M00252 | V\$TATA_01 | 0.80106<br>6       | 11733 | (+)              | STATAAAWRNNNNNNN | ATTTATAAAAGATAA  |
| M00216 | V\$TATA_C  | 0.92711<br>9       | 11734 | (+)              | NCTATAAAAR       | TTTATAAAAAG      |
| M00252 | V\$TATA_01 | 0.85130<br>7       | 11735 | (+)              | STATAAAWRNNNNNNN | TTATAAAAGATAAAA  |
| M00252 | V\$TATA_01 | 0.78711<br>0.76445 | 11742 | (+)              | STATAAAWRNNNNNNN | AGATAAAATGTAAAT  |
| M00216 | V\$TATA_C  | 0.76102<br>7       | 11896 | (+)              | NCTATAAAAR       | GTTAGAAAAT       |
| M00216 | V\$TATA_C  | 0.75072<br>5       | 11922 | (+)              | NCTATAAAAR       | ATTTTCAAAA       |
| M00216 | V\$TATA_C  | 0.77739<br>6       | 11923 | (+)              | NCTATAAAAR       | TTTTCAAAAT       |
| M00216 | V\$TATA_C  | 0.81451<br>6       | 11986 | (+)              | NCTATAAAAR       | ATTGTAAAAT       |
| M00252 | V\$TATA_01 | 0.83628<br>4       | 12045 | (+)              | STATAAAWRNNNNNNN | CTATTTAGGAACAAC  |
| M00216 | V\$TATA_C  | 0.83151<br>2       | 12065 | (+)              | NCTATAAAAR       | AGTATGAAAG       |
| M00252 | V\$TATA_01 | 0.79931<br>5       | 12066 | (+)              | STATAAAWRNNNNNNN | GTATGAAAGAGGGAA  |
| M00216 | V\$TATA_C  | 0.84217<br>3       | 12139 | (+)              | NCTATAAAAR       | AGTTTAAATA       |
| M00252 | V\$TATA_01 | 0.81172<br>2       | 12140 | (+)              | STATAAAWRNNNNNNN | GTTTAAATATGTTTG  |
| M00216 | V\$TATA_C  | 0.76762<br>4       | 12154 | (+)              | NCTATAAAAR       | GCTTTTAAAT       |
| M00216 | V\$TATA_C  | 0.81730<br>6       | 12155 | (+)              | NCTATAAAAR       | CTTTTAAATA       |
| M00252 | V\$TATA_01 | 0.82360<br>5       | 12156 | (+)              | STATAAAWRNNNNNNN | TTTTAAATAGCTTCA  |
| M00216 | V\$TATA_C  | 0.79142<br>7       | 12277 | (+)              | NCTATAAAAR       | TCTTTGAAAT       |
| M00252 | V\$TATA_01 | 0.75864<br>3       | 12278 | (+)              | STATAAAWRNNNNNNN | CTTTGAAATGGGAGC  |
| M00216 | V\$TATA_C  | 0.77315<br>8       | 12327 | (+)              | NCTATAAAAR       | CCTTTGTAAT       |
| M00252 | V\$TATA_01 | 0.7932<br>4        | 12458 | (+)              | STATAAAWRNNNNNNN | ATTTATATTTAGGAA  |
| M00252 | V\$TATA_01 | 0.77493<br>12518   | (+)   | STATAAAWRNNNNNNN | TTATATTTAGGAAAT  |                  |
| M00216 | V\$TATA_C  | 0.85371<br>0.75283 | 12537 | (+)              | NCTATAAAAR       | CCTTTAGAAG       |
| M00216 | V\$TATA_C  | 0.90678<br>9       | 12574 | (+)              | NCTATAAAAR       | TCTGTCAAAA       |
| M00216 | V\$TATA_C  | 0.87693<br>6       | 12628 | (+)              | NCTATAAAAR       | TCTATATAAT       |
| M00252 | V\$TATA_01 | 0.76313<br>5       | 12629 | (+)              | STATAAAWRNNNNNNN | CTATATAATAGAAAC  |
| M00216 | V\$TATA_C  | 0.80309<br>7       | 12630 | (+)              | NCTATAAAAR       | TATATAATAG       |
| M00252 | V\$TATA_01 | 0.78533<br>6       | 12631 | (+)              | STATAAAWRNNNNNNN | ATATAATAGAACTG   |
| M00252 | V\$TATA_01 | 0.86612<br>4       | 12704 | (+)              | STATAAAWRNNNNNNN | ATTTTTAAGGTGACA  |
| M00216 | V\$TATA_C  | 0.82694<br>1       | 12761 | (+)              | NCTATAAAAR       | CCTATCAAAA       |
| M00252 | V\$TATA_01 | 7                  | 12762 | (+)              | STATAAAWRNNNNNNN | CTATCAAAAAGCTATG |

|        |            |         |       |     |                 |                  |
|--------|------------|---------|-------|-----|-----------------|------------------|
|        |            | 0.74201 |       |     |                 |                  |
| M00216 | V\$TATA_C  | 2       | 12839 | (+) | NCTATAAAAR      | GTCTTAGAAG       |
| M00216 | V\$TATA_C  | 0.78479 | 12857 | (+) | NCTATAAAAR      | TCTAGATAAT       |
|        |            | 0.78584 |       |     |                 |                  |
| M00252 | V\$TATA_01 | 1       | 12858 | (+) | STATAAAWRNNNNNN | CTAGATAATGCAATT  |
|        |            | 0.76102 |       |     |                 |                  |
| M00216 | V\$TATA_C  | 5       | 12918 | (+) | NCTATAAAAR      | ATTTCAAAAA       |
|        |            | 0.93504 |       |     |                 |                  |
| M00216 | V\$TATA_C  | 1       | 12959 | (+) | NCTATAAAAR      | GCCTTAAAAG       |
|        |            | 0.80487 |       |     |                 |                  |
| M00252 | V\$TATA_01 | 2       | 12960 | (+) | STATAAAWRNNNNNN | CCTTAAAAGATCACC  |
|        |            | 0.75547 |       |     |                 |                  |
| M00216 | V\$TATA_C  | 9       | 13001 | (+) | NCTATAAAAR      | CCTATGATAG       |
|        |            | 0.79931 |       |     |                 |                  |
| M00216 | V\$TATA_C  | 3       | 13045 | (+) | NCTATAAAAR      | AGTTTTAAAA       |
|        |            | 0.85186 |       |     |                 |                  |
| M00216 | V\$TATA_C  | 2       | 13046 | (+) | NCTATAAAAR      | GTTTTAAAAAC      |
|        |            | 0.81349 |       |     |                 |                  |
| M00252 | V\$TATA_01 | 9       | 13046 | (+) | STATAAAWRNNNNNN | GTTTTAAAAC TGCCC |
|        |            | 0.81045 |       |     |                 |                  |
| M00252 | V\$TATA_01 | 4       | 13047 | (+) | STATAAAWRNNNNNN | TTTTAAAAC TGCCCC |
|        |            | 0.86612 |       |     |                 |                  |
| M00216 | V\$TATA_C  | 1       | 13187 | (+) | NCTATAAAAR      | GCTATGAAAG       |
|        |            | 0.82085 |       |     |                 |                  |
| M00252 | V\$TATA_01 | 8       | 13188 | (+) | STATAAAWRNNNNNN | CTATGAAAGATCAGA  |
|        |            | 0.74306 |       |     |                 |                  |
| M00216 | V\$TATA_C  | 8       | 13308 | (+) | NCTATAAAAR      | TCATTCAAAT       |
|        |            | 0.78533 |       |     |                 |                  |
| M00252 | V\$TATA_01 | 4       | 13326 | (+) | STATAAAWRNNNNNN | TTATTAATCTATAGT  |
|        |            |         |       |     |                 |                  |
| M00216 | V\$TATA_C  | 0.77502 | 13465 | (+) | NCTATAAAAR      | CTTCTAAAAC       |
|        |            | 0.81066 |       |     |                 |                  |
| M00216 | V\$TATA_C  | 8       | 13514 | (+) | NCTATAAAAR      | AGTTTTAAAG       |
|        |            | 0.76762 |       |     |                 |                  |
| M00216 | V\$TATA_C  | 6       | 13515 | (+) | NCTATAAAAR      | GTTTTAAAGG       |
|        |            | 0.80563 |       |     |                 |                  |
| M00252 | V\$TATA_01 | 3       | 13515 | (+) | STATAAAWRNNNNNN | GTTTTAAAGGTGGTA  |
|        |            | 0.77112 |       |     |                 |                  |
| M00252 | V\$TATA_01 | 4       | 13516 | (+) | STATAAAWRNNNNNN | TTTTAAAGGTGGTAA  |
|        |            | 0.84103 |       |     |                 |                  |
| M00216 | V\$TATA_C  | 5       | 13588 | (+) | NCTATAAAAR      | AATTTAAAAA       |
|        |            | 0.76102 |       |     |                 |                  |
| M00216 | V\$TATA_C  | 5       | 13589 | (+) | NCTATAAAAR      | ATTTAAAAAA       |
|        |            | 0.84876 |       |     |                 |                  |
| M00252 | V\$TATA_01 | 9       | 13589 | (+) | STATAAAWRNNNNNN | ATTTAAAAAAGAAAC  |
|        |            | 0.80512 |       |     |                 |                  |
| M00216 | V\$TATA_C  | 3       | 13590 | (+) | NCTATAAAAR      | TTTAAAAAAG       |
|        |            | 0.81383 |       |     |                 |                  |
| M00216 | V\$TATA_C  | 7       | 13624 | (+) | NCTATAAAAR      | GTTTTATAAA       |
|        |            | 0.78025 |       |     |                 |                  |
| M00252 | V\$TATA_01 | 9       | 13625 | (+) | STATAAAWRNNNNNN | TTTATAAATATGAA   |
|        |            | 0.79376 |       |     |                 |                  |
| M00216 | V\$TATA_C  | 8       | 13626 | (+) | NCTATAAAAR      | TTTATAAATA       |
|        |            | 0.88480 |       |     |                 |                  |
| M00252 | V\$TATA_01 | 1       | 13627 | (+) | STATAAAWRNNNNNN | TTATAAATATGAATC  |
|        |            | 0.77569 |       |     |                 |                  |
| M00252 | V\$TATA_01 | 1       | 13649 | (+) | STATAAAWRNNNNNN | GGATTAAACAAGATT  |
|        |            | 0.78399 |       |     |                 |                  |
| M00216 | V\$TATA_C  | 8       | 13736 | (+) | NCTATAAAAR      | CTTCTAAAAT       |
|        |            | 0.75732 |       |     |                 |                  |
| M00216 | V\$TATA_C  | 8       | 13834 | (+) | NCTATAAAAR      | TCCATGTAAT       |
|        |            | 0.76815 |       |     |                 |                  |
| M00216 | V\$TATA_C  | 4       | 13843 | (+) | NCTATAAAAR      | TTTTTTAAAA       |
|        |            |         |       |     |                 |                  |
| M00252 | V\$TATA_01 | 0.78914 | 13843 | (+) | STATAAAWRNNNNNN | TTTTTTAAAAAGAGG  |

|        |            |                 |       |     |                 |                  |
|--------|------------|-----------------|-------|-----|-----------------|------------------|
| M00216 | V\$TATA_C  | 0.89015<br>1    | 13844 | (+) | NCTATAAAAR      | TTTTTAAAAA       |
| M00252 | V\$TATA_01 | 0.78939<br>4    | 13844 | (+) | STATAAAWRNNNNNN | TTTTTAAAAAGAGGG  |
| M00216 | V\$TATA_C  | 0.77950<br>9    | 13845 | (+) | NCTATAAAAR      | TTTTTAAAAAG      |
| M00252 | V\$TATA_01 | 0.85790<br>4    | 13845 | (+) | STATAAAWRNNNNNN | TTTTTAAAAAGAGGGT |
| M00252 | V\$TATA_01 | 0.77822<br>9    | 13913 | (+) | STATAAAWRNNNNNN | GCATTAACTGGGTT   |
| M00252 | V\$TATA_01 | 0.82669<br>4    | 14011 | (+) | STATAAAWRNNNNNN | ATATTAATACTAATA  |
| M00216 | V\$TATA_C  | 0.85054<br>1    | 14114 | (+) | NCTATAAAAR      | TCCATCAAAG       |
| M00252 | V\$TATA_01 | 0.77239<br>3    | 14127 | (+) | STATAAAWRNNNNNN | ATATATTTTCCACCT  |
| M00252 | V\$TATA_01 | 0.82796<br>2    | 14142 | (+) | STATAAAWRNNNNNN | GAATATATAAAGAAT  |
| M00216 | V\$TATA_C  | 0.80221<br>8    | 14143 | (+) | NCTATAAAAR      | AATATATAAA       |
| M00252 | V\$TATA_01 | 0.87642<br>7    | 14144 | (+) | STATAAAWRNNNNNN | ATATATAAAGAATTA  |
| M00216 | V\$TATA_C  | 0.75178<br>2    | 14145 | (+) | NCTATAAAAR      | TATATAAAGA       |
| M00252 | V\$TATA_01 | 0.83278<br>4    | 14146 | (+) | STATAAAWRNNNNNN | ATATAAAGAATTACA  |
| M00252 | V\$TATA_01 | 0.82111<br>1    | 14158 | (+) | STATAAAWRNNNNNN | ACATTAATGCACAGA  |
| M00216 | V\$TATA_C  | 0.80406<br>7    | 14175 | (+) | NCTATAAAAR      | CAAATAAAAG       |
| M00252 | V\$TATA_01 | 0.88175<br>6    | 14176 | (+) | STATAAAWRNNNNNN | AAATAAAAGGCCATG  |
| M00216 | V\$TATA_C  | 0.77766<br>6    | 14221 | (+) | NCTATAAAAR      | TTCAGAAAAG       |
| M00216 | V\$TATA_C  | 0.76630<br>6    | 14377 | (+) | NCTATAAAAR      | TTCATGAAAA       |
| M00216 | V\$TATA_C  | 0.76049<br>6    | 14378 | (+) | NCTATAAAAR      | TCATGAAAAA       |
| M00216 | V\$TATA_C  | 0.83496<br>2    | 14392 | (+) | NCTATAAAAR      | ACTATAGAAC       |
| M00252 | V\$TATA_01 | 0.78711<br>9    | 14393 | (+) | STATAAAWRNNNNNN | CTATAGAACAGAAAG  |
| M00216 | V\$TATA_C  | 0.85687<br>9    | 14442 | (+) | NCTATAAAAR      | AGTTTATAAA       |
| M00252 | V\$TATA_01 | 0.7932<br>14443 | 14443 | (+) | STATAAAWRNNNNNN | GTTTATAAATTATAT  |
| M00216 | V\$TATA_C  | 0.77634<br>8    | 14444 | (+) | NCTATAAAAR      | TTTATAAATT       |
| M00252 | V\$TATA_01 | 0.77746<br>8    | 14445 | (+) | STATAAAWRNNNNNN | TTATAAATTATATAA  |
| M00216 | V\$TATA_C  | 0.82677<br>6    | 14451 | (+) | NCTATAAAAR      | ATTATATAAT       |
| M00252 | V\$TATA_01 | 0.78685<br>6    | 14452 | (+) | STATAAAWRNNNNNN | TTATATAATAATTAA  |
| M00216 | V\$TATA_C  | 0.75178<br>2    | 14453 | (+) | NCTATAAAAR      | TATATAATAA       |
| M00252 | V\$TATA_01 | 0.77467<br>6    | 14454 | (+) | STATAAAWRNNNNNN | ATATAATAATTAAAT  |
| M00216 | V\$TATA_C  | 0.74412<br>5    | 14589 | (+) | NCTATAAAAR      | CCTAAGAAAA       |
| M00216 | V\$TATA_C  | 0.74306<br>8    | 14947 | (+) | NCTATAAAAR      | TCATTTAAAT       |
| M00252 | V\$TATA_01 | 0.82720<br>1    | 14949 | (+) | STATAAAWRNNNNNN | ATTTAAATGACTGCA  |
| M00252 | V\$TATA_01 | 0.77543<br>8    | 14974 | (+) | STATAAAWRNNNNNN | GTATCAAGGGAAATA  |

|        |            |         |       |     |                 |                 |
|--------|------------|---------|-------|-----|-----------------|-----------------|
|        |            | 0.76366 |       |     |                 |                 |
| M00216 | V\$TATA_C  | 5       | 14998 | (+) | NCTATAAAAR      | ATAATATAAA      |
|        |            | 0.77366 |       |     |                 |                 |
| M00252 | V\$TATA_01 | 2       | 14999 | (+) | STATAAAWRNNNNNN | TAATATAAAAATAAA |
|        |            | 0.86664 |       |     |                 |                 |
| M00216 | V\$TATA_C  | 9       | 15000 | (+) | NCTATAAAAR      | AATATAAAAA      |
|        |            | 0.89418 |       |     |                 |                 |
| M00252 | V\$TATA_01 | 9       | 15001 | (+) | STATAAAWRNNNNNN | ATATAAAAATAAATT |
|        |            | 0.77924 |       |     |                 |                 |
| M00252 | V\$TATA_01 | 4       | 15007 | (+) | STATAAAWRNNNNNN | AAATAAATTTAGAAT |
|        |            | 0.78152 |       |     |                 |                 |
| M00252 | V\$TATA_01 | 8       | 15031 | (+) | STATAAAWRNNNNNN | ACTTAAATGCTTAGT |
|        |            |         |       |     |                 |                 |
| M00252 | V\$TATA_01 | 0.8102  | 15092 | (+) | STATAAAWRNNNNNN | TGATATATGGCTAAT |
|        |            |         |       |     |                 |                 |
| M00216 | V\$TATA_C  | 0.85239 | 15240 | (+) | NCTATAAAAR      | TCTTTAAATG      |
|        |            | 0.85079 |       |     |                 |                 |
| M00252 | V\$TATA_01 | 9       | 15241 | (+) | STATAAAWRNNNNNN | CTTTAAATGCCTTTC |
|        |            | 0.74623 |       |     |                 |                 |
| M00216 | V\$TATA_C  | 7       | 15371 | (+) | NCTATAAAAR      | ATAATATAAT      |
|        |            | 0.79218 |       |     |                 |                 |
| M00252 | V\$TATA_01 | 5       | 15388 | (+) | STATAAAWRNNNNNN | GTTTTTATAACCTTG |
|        |            | 0.79931 |       |     |                 |                 |
| M00216 | V\$TATA_C  | 3       | 15389 | (+) | NCTATAAAAR      | TTTTTATAAC      |
|        |            | 0.74465 |       |     |                 |                 |
| M00216 | V\$TATA_C  | 3       | 15413 | (+) | NCTATAAAAR      | AATATAATAA      |
|        |            | 0.80664 |       |     |                 |                 |
| M00252 | V\$TATA_01 | 8       | 15414 | (+) | STATAAAWRNNNNNN | ATATAATAATCTATT |
|        |            | 0.84166 |       |     |                 |                 |
| M00252 | V\$TATA_01 | 5       | 15605 | (+) | STATAAAWRNNNNNN | ATATGAATACAAAGG |
|        |            | 0.75336 |       |     |                 |                 |
| M00216 | V\$TATA_C  | 7       | 15608 | (+) | NCTATAAAAR      | TGAATACAAA      |
|        |            |         |       |     |                 |                 |
| M00252 | V\$TATA_01 | 0.77899 | 15611 | (+) | STATAAAWRNNNNNN | ATACAAAGGTACAAC |
|        |            | 0.84209 |       |     |                 |                 |
| M00216 | V\$TATA_C  | 1       | 15632 | (+) | NCTATAAAAR      | ACTATAAAGT      |
|        |            | 0.81349 |       |     |                 |                 |
| M00252 | V\$TATA_01 | 9       | 15633 | (+) | STATAAAWRNNNNNN | CTATAAAGTTGTTTT |
|        |            | 0.83963 |       |     |                 |                 |
| M00252 | V\$TATA_01 | 5       | 15666 | (+) | STATAAAWRNNNNNN | CTATATTTAGACACA |
|        |            | 0.81781 |       |     |                 |                 |
| M00252 | V\$TATA_01 | 3       | 15668 | (+) | STATAAAWRNNNNNN | ATATTTAGACACATT |
|        |            | 0.78663 |       |     |                 |                 |
| M00216 | V\$TATA_C  | 9       | 15729 | (+) | NCTATAAAAR      | ATTATAATAA      |
|        |            | 0.77391 |       |     |                 |                 |
| M00252 | V\$TATA_01 | 5       | 15745 | (+) | STATAAAWRNNNNNN | ATTTAAGTAACAATA |
|        |            | 0.87457 |       |     |                 |                 |
| M00216 | V\$TATA_C  | 1       | 15754 | (+) | NCTATAAAAR      | ACAATAAAAC      |
|        |            | 0.80411 |       |     |                 |                 |
| M00252 | V\$TATA_01 | 1       | 15755 | (+) | STATAAAWRNNNNNN | CAATAAAACTAGCTA |
|        |            | 0.75336 |       |     |                 |                 |
| M00216 | V\$TATA_C  | 7       | 15777 | (+) | NCTATAAAAR      | TTAATATAAT      |
|        |            | 0.75785 |       |     |                 |                 |
| M00216 | V\$TATA_C  | 6       | 15803 | (+) | NCTATAAAAR      | TCTACACAAG      |
|        |            | 0.75917 |       |     |                 |                 |
| M00216 | V\$TATA_C  | 6       | 15865 | (+) | NCTATAAAAR      | TCTTTATGAT      |
|        |            | 0.77391 |       |     |                 |                 |
| M00252 | V\$TATA_01 | 5       | 15866 | (+) | STATAAAWRNNNNNN | CTTTATGATCACTGG |
|        |            | 0.74148 |       |     |                 |                 |
| M00216 | V\$TATA_C  | 4       | 15879 | (+) | NCTATAAAAR      | GGAATAGAAA      |
|        |            | 0.82070 |       |     |                 |                 |
| M00216 | V\$TATA_C  | 2       | 15889 | (+) | NCTATAAAAR      | TACTTAAAAA      |
|        |            |         |       |     |                 |                 |
| M00216 | V\$TATA_C  | 0.84526 | 15890 | (+) | NCTATAAAAR      | ACTTAAAAAG      |
|        |            | 0.80411 |       |     |                 |                 |
| M00252 | V\$TATA_01 | 1       | 15890 | (+) | STATAAAWRNNNNNN | ACTTAAAAAGTCACA |

|        |            |              |       |     |                  |                  |
|--------|------------|--------------|-------|-----|------------------|------------------|
| M00252 | V\$TATA_01 | 0.85156<br>1 | 15943 | (+) | STATAAAWRNNNNNNN | ATTTAAATGTCCATA  |
|        |            | 0.78848      |       |     |                  |                  |
| M00216 | V\$TATA_C  | 7            | 16044 | (+) | NCTATAAAAR       | CCCTTACAAC       |
|        |            | 0.75706      |       |     |                  |                  |
| M00216 | V\$TATA_C  | 4            | 16130 | (+) | NCTATAAAAR       | ACTGCAAAAG       |
|        |            | 0.81451      |       |     |                  |                  |
| M00252 | V\$TATA_01 | 4            | 16154 | (+) | STATAAAWRNNNNNNN | TCATAAATTGCCTGT  |
|        |            | 0.84790      |       |     |                  |                  |
| M00216 | V\$TATA_C  | 1            | 16164 | (+) | NCTATAAAAR       | CCTGTAAAAAC      |
|        |            | 0.81357      |       |     |                  |                  |
| M00216 | V\$TATA_C  | 3            | 16171 | (+) | NCTATAAAAR       | AACTTAAAAA       |
|        |            | 0.81647      |       |     |                  |                  |
| M00216 | V\$TATA_C  | 7            | 16172 | (+) | NCTATAAAAR       | ACTTAAAAAT       |
|        |            | 0.79903      |       |     |                  |                  |
| M00252 | V\$TATA_01 | 6            | 16172 | (+) | STATAAAWRNNNNNNN | ACTTAAAAATCAGGA  |
|        |            | 0.75495      |       |     |                  |                  |
| M00216 | V\$TATA_C  | 1            | 16215 | (+) | NCTATAAAAR       | CACATATAAC       |
|        |            | 0.77315      |       |     |                  |                  |
| M00252 | V\$TATA_01 | 4            | 16216 | (+) | STATAAAWRNNNNNNN | ACATATAACTTTGTG  |
|        |            | 0.87087      |       |     |                  |                  |
| M00216 | V\$TATA_C  | 4            | 16259 | (+) | NCTATAAAAR       | ACTATTAAAG       |
|        |            | 0.86196      |       |     |                  |                  |
| M00252 | V\$TATA_01 | 4            | 16260 | (+) | STATAAAWRNNNNNNN | CTATTAAAGTGATC   |
|        |            | 0.74491      |       |     |                  |                  |
| M00216 | V\$TATA_C  | 7            | 16272 | (+) | NCTATAAAAR       | ATCTTAACAG       |
|        |            | 0.84050      |       |     |                  |                  |
| M00216 | V\$TATA_C  | 7            | 16290 | (+) | NCTATAAAAR       | CCTTTCAAAA       |
|        |            |              |       |     |                  |                  |
| M00216 | V\$TATA_C  | 0.74122      | 16291 | (+) | NCTATAAAAR       | CTTTCAAAAC       |
|        |            | 0.74650      |       |     |                  |                  |
| M00216 | V\$TATA_C  | 1            | 16397 | (+) | NCTATAAAAR       | TCTATCCAAA       |
|        |            | 0.74069      |       |     |                  |                  |
| M00216 | V\$TATA_C  | 2            | 16420 | (+) | NCTATAAAAR       | GTTTTAGAAT       |
|        |            | 0.83152      |       |     |                  |                  |
| M00216 | V\$TATA_C  | 9            | 16553 | (+) | NCTATAAAAR       | GGTATAAAGG       |
|        |            | 0.91981      |       |     |                  |                  |
| M00252 | V\$TATA_01 | 7            | 16554 | (+) | STATAAAWRNNNNNNN | GTATAAAGGCCACTG  |
|        |            | 0.74887      |       |     |                  |                  |
| M00216 | V\$TATA_C  | 8            | 16589 | (+) | NCTATAAAAR       | TTCATTAAAT       |
|        |            | 0.74306      |       |     |                  |                  |
| M00216 | V\$TATA_C  | 8            | 16590 | (+) | NCTATAAAAR       | TCATTAAATT       |
|        |            | 0.78000      |       |     |                  |                  |
| M00252 | V\$TATA_01 | 5            | 16601 | (+) | STATAAAWRNNNNNNN | CTATATGGAAAAATGT |
|        |            | 0.74201      |       |     |                  |                  |
| M00216 | V\$TATA_C  | 2            | 16613 | (+) | NCTATAAAAR       | TGTTTTTAAA       |
|        |            | 0.76762      |       |     |                  |                  |
| M00216 | V\$TATA_C  | 6            | 16614 | (+) | NCTATAAAAR       | GTTTTTAAAG       |
|        |            | 0.80994      |       |     |                  |                  |
| M00252 | V\$TATA_01 | 7            | 16614 | (+) | STATAAAWRNNNNNNN | GTTTTTAAAGCCTTT  |
|        |            | 0.74174      |       |     |                  |                  |
| M00216 | V\$TATA_C  | 8            | 16615 | (+) | NCTATAAAAR       | TTTTTAAAGC       |
|        |            | 0.77543      |       |     |                  |                  |
| M00252 | V\$TATA_01 | 8            | 16615 | (+) | STATAAAWRNNNNNNN | TTTTTAAAGCCTTTG  |
|        |            | 0.76868      |       |     |                  |                  |
| M00216 | V\$TATA_C  | 2            | 16702 | (+) | NCTATAAAAR       | TCAATAAATT       |
|        |            | 0.77645      |       |     |                  |                  |
| M00252 | V\$TATA_01 | 3            | 16703 | (+) | STATAAAWRNNNNNNN | CAATAAATTACATTT  |
|        |            | 0.83438      |       |     |                  |                  |
| M00223 | V\$STAT_01 | 4            | 159   | (+) | TTCCCRKAA        | TTCCTATGA        |
|        |            | 0.86866      |       |     |                  |                  |
| M00223 | V\$STAT_01 | 6            | 327   | (+) | TTCCCRKAA        | TTATGGTAA        |
|        |            | 0.93193      |       |     |                  |                  |
| M00223 | V\$STAT_01 | 8            | 327   | (-) | TTCCCRKAA        | TTATGGTAA        |
|        |            | 0.80262      |       |     |                  |                  |
| M00223 | V\$STAT_01 | 2            | 462   | (-) | TTCCCRKAA        | TTAGGTAA         |



|        |             |                         |      |     |                       |                        |
|--------|-------------|-------------------------|------|-----|-----------------------|------------------------|
| M00225 | V\$STAT3_01 | 0.75930<br>5<br>0.74424 | 730  | (+) | NGNNATTCCSGGAARTGNNN  | TCITTATTTATCTGAAATGCAT |
| M00225 | V\$STAT3_01 | 3                       | 730  | (-) | NGNNATTCCSGGAARTGNNN  | TCITTATTTATCTGAAATGCAT |
| M00223 | V\$STAT_01  | 0.80968<br>0.82656      | 736  | (+) | TTCCCRKAA             | TTATCTGAA              |
| M00223 | V\$STAT_01  | 9                       | 736  | (-) | TTCCCRKAA             | TTATCTGAA              |
| M00223 | V\$STAT_01  | 0.81673<br>0.84976      | 794  | (+) | TTCCCRKAA             | TTAATGGAA              |
| M00223 | V\$STAT_01  | 1                       | 1080 | (-) | TTCCCRKAA             | CTACAGGAA              |
| M00223 | V\$STAT_01  | 0.81673<br>0.81774      | 1104 | (+) | TTCCCRKAA             | TTATTGTCA              |
| M00223 | V\$STAT_01  | 6                       | 1154 | (+) | TTCCCRKAA             | TTCTCTGA               |
| M00223 | V\$STAT_01  | 0.79052<br>0.88807      | 1170 | (+) | TTCCCRKAA             | TTACTATTA              |
| M00223 | V\$STAT_01  | 7                       | 1339 | (+) | TTCCCRKAA             | TTATCATAA              |
| M00223 | V\$STAT_01  | 0.85152<br>0.81673      | 1339 | (-) | TTCCCRKAA             | TTATCATAA              |
| M00223 | V\$STAT_01  | 8                       | 1357 | (+) | TTCCCRKAA             | TTGTTGGAA              |
| M00223 | V\$STAT_01  | 0.86135<br>0.80589      | 1397 | (+) | TTCCCRKAA             | TTATTATAA              |
| M00223 | V\$STAT_01  | 9                       | 1497 | (-) | TTCCCRKAA             | GTACAGTAA              |
| M00223 | V\$STAT_01  | 0.83287<br>0.85681      | 2116 | (+) | TTCCCRKAA             | TTCCAGGCA              |
| M00223 | V\$STAT_01  | 9                       | 2116 | (-) | TTCCCRKAA             | TTCCAGGCA              |
| M00223 | V\$STAT_01  | 0.82682<br>1            | 2351 | (+) | TTCCCRKAA             | TTCTTCTCA              |
| M00223 | V\$STAT_01  | 0.8364                  | 2354 | (+) | TTCCCRKAA             | TTCTCAAAA              |
| M00223 | V\$STAT_01  | 0.8606                  | 2451 | (-) | TTCCCRKAA             | TGACAAGAA              |
| M00223 | V\$STAT_01  | 0.8606<br>0.72583       | 2666 | (-) | TTCCCRKAA             | TGACAGTAA              |
| M00224 | V\$STAT1_01 | 6                       | 2670 | (+) | NNNSANTTCCGGGAANTGNSN | AGTAAGTTACGAAAAAAGGGT  |
| M00223 | V\$STAT_01  | 0.79984<br>9            | 2676 | (+) | TTCCCRKAA             | TTACGAAAA              |
| M00223 | V\$STAT_01  | 0.8364<br>0.85152       | 2676 | (-) | TTCCCRKAA             | TTACGAAAA              |
| M00223 | V\$STAT_01  | 5                       | 2891 | (+) | TTCCCRKAA             | TTATGATAA              |
| M00223 | V\$STAT_01  | 0.88807<br>0.82631      | 2891 | (-) | TTCCCRKAA             | TTATGATAA              |
| M00223 | V\$STAT_01  | 7                       | 3170 | (+) | TTCCCRKAA             | TTAACAGAA              |
| M00223 | V\$STAT_01  | 0.80993<br>0.83362      | 3170 | (-) | TTCCCRKAA             | TTAACAGAA              |
| M00223 | V\$STAT_01  | 7                       | 3229 | (+) | TTCCCRKAA             | TTCTAAGAA              |
| M00223 | V\$STAT_01  | 0.91227<br>0.82631      | 3229 | (-) | TTCCCRKAA             | TTCTAAGAA              |
| M00223 | V\$STAT_01  | 7                       | 3263 | (-) | TTCCCRKAA             | TGATGATAA              |
| M00223 | V\$STAT_01  | 0.80589<br>0.81976      | 3604 | (-) | TTCCCRKAA             | TTACAAGAG              |
| M00223 | V\$STAT_01  | 3                       | 3700 | (+) | TTCCCRKAA             | TTACCCCAA              |
| M00223 | V\$STAT_01  | 0.84976<br>1            | 4097 | (-) | TTCCCRKAA             | CTACAGGAA              |

|        |             |                    |      |     |                       |                       |
|--------|-------------|--------------------|------|-----|-----------------------|-----------------------|
| M00223 | V\$STAT_01  | 0.79178<br>2       | 4137 | (-) | TTCCCRKAA             | TGGCGGTAA             |
| M00224 | V\$STAT1_01 | 0.76354<br>4       | 4175 | (+) | NNNSANTTCCGGGAANTGNSN | TGTATTTTCTGGAAAAATCA  |
| M00223 | V\$STAT_01  | 0.8606<br>0.79203  | 4181 | (+) | TTCCCRKAA             | TTTCTGGAA             |
| M00223 | V\$STAT_01  | 4                  | 4181 | (-) | TTCCCRKAA             | TTTCTGGAA             |
| M00223 | V\$STAT_01  | 0.81699<br>0.87017 | 4182 | (+) | TTCCCRKAA             | TTCTGGAAA             |
| M00223 | V\$STAT_01  | 9                  | 4182 | (-) | TTCCCRKAA             | TTCTGGAAA             |
| M00223 | V\$STAT_01  | 0.81724<br>2       | 4399 | (+) | TTCCCRKAA             | TTCTCATTA             |
| M00223 | V\$STAT_01  | 0.79253<br>8       | 4563 | (+) | TTCCCRKAA             | TTAATATAA             |
| M00224 | V\$STAT1_01 | 0.73275<br>2       | 4585 | (+) | NNNSANTTCCGGGAANTGNSN | TAGCCTTTTCCAGAAGTGTTT |
| M00224 | V\$STAT1_01 | 0.72089<br>6       | 4585 | (-) | NNNSANTTCCGGGAANTGNSN | TAGCCTTTTCCAGAAGTGTTT |
| M00225 | V\$STAT3_01 | 0.75177<br>4       | 4585 | (+) | NGNNATTTCCSGGAARTGNNN | TAGCCTTTTCCAGAAGTGTTT |
| M00223 | V\$STAT_01  | 0.87017<br>9       | 4591 | (+) | TTCCCRKAA             | TTTCCAGAA             |
| M00223 | V\$STAT_01  | 0.81699<br>0.81547 | 4591 | (-) | TTCCCRKAA             | TTTCCAGAA             |
| M00223 | V\$STAT_01  | 8                  | 4671 | (-) | TTCCCRKAA             | TTATGGTAT             |
| M00223 | V\$STAT_01  | 0.92941<br>8       | 4810 | (+) | TTCCCRKAA             | TTACTGGAA             |
| M00223 | V\$STAT_01  | 0.88757<br>2       | 4810 | (-) | TTCCCRKAA             | TTACTGGAA             |
| M00223 | V\$STAT_01  | 0.82682<br>1       | 4910 | (-) | TTCCCRKAA             | TTGCAAGAA             |
| M00223 | V\$STAT_01  | 0.80060<br>5       | 5032 | (-) | TTCCCRKAA             | TAAGGAGAA             |
| M00223 | V\$STAT_01  | 0.80690<br>7       | 5153 | (+) | TTCCCRKAA             | TTAAGGGAA             |
| M00223 | V\$STAT_01  | 0.89034<br>5       | 5153 | (-) | TTCCCRKAA             | TTAAGGGAA             |
| M00223 | V\$STAT_01  | 0.96622<br>1       | 5265 | (+) | TTCCCRKAA             | TTCTGTAA              |
| M00223 | V\$STAT_01  | 0.85076<br>9       | 5265 | (-) | TTCCCRKAA             | TTCTGTAA              |
| M00223 | V\$STAT_01  | 0.8243<br>0.79253  | 5316 | (-) | TTCCCRKAA             | TACTGAGAA             |
| M00223 | V\$STAT_01  | 8                  | 5378 | (+) | TTCCCRKAA             | TTAGTATAA             |
| M00223 | V\$STAT_01  | 0.81295<br>7       | 5502 | (-) | TTCCCRKAA             | CTCCAAGAA             |
| M00223 | V\$STAT_01  | 0.86765<br>8       | 5656 | (+) | TTCCCRKAA             | TTCTTGGCA             |
| M00223 | V\$STAT_01  | 0.82682<br>1       | 5834 | (-) | TTCCCRKAA             | TTCAAAGAA             |
| M00223 | V\$STAT_01  | 0.80136<br>1       | 5952 | (-) | TTCCCRKAA             | TGATGGAAA             |
| M00223 | V\$STAT_01  | 0.86362<br>5       | 6121 | (-) | TTCCCRKAA             | TTAAAGGAA             |
| M00223 | V\$STAT_01  | 0.79253<br>8       | 6152 | (+) | TTCCCRKAA             | TTATCAAAA             |
| M00223 | V\$STAT_01  | 0.79581<br>5       | 6376 | (-) | TTCCCRKAA             | TTCTAAGGA             |
| M00223 | V\$STAT_01  | 0.80060<br>5       | 6587 | (-) | TTCCCRKAA             | TCAGGAGAA             |
| M00223 | V\$STAT_01  | 0.79178<br>2       | 6686 | (+) | TTCCCRKAA             | TTTCTGTCA             |

|        |             |         |       |     |                      |                       |
|--------|-------------|---------|-------|-----|----------------------|-----------------------|
|        |             | 0.92109 |       |     |                      |                       |
| M00223 | V\$STAT_01  | 9       | 6960  | (+) | TTCCCRKAA            | TTCCCAGCA             |
|        |             | 0.80312 |       |     |                      |                       |
| M00223 | V\$STAT_01  | 6       | 6960  | (-) | TTCCCRKAA            | TTCCCAGCA             |
|        |             | 0.81976 |       |     |                      |                       |
| M00223 | V\$STAT_01  | 3       | 7042  | (+) | TTCCCRKAA            | TTCTCCCAA             |
|        |             | 0.84976 |       |     |                      |                       |
| M00223 | V\$STAT_01  | 1       | 7069  | (+) | TTCCCRKAA            | TTCTGTAG              |
|        |             | 0.80262 |       |     |                      |                       |
| M00223 | V\$STAT_01  | 2       | 7393  | (-) | TTCCCRKAA            | TTAGGAAAA             |
|        |             | 0.81925 |       |     |                      |                       |
| M00223 | V\$STAT_01  | 9       | 7924  | (-) | TTCCCRKAA            | TTATGTAA              |
|        |             | 0.77128 |       |     |                      |                       |
| M00224 | V\$STAT1_01 | 3       | 7984  | (-) | NNNSANTTCCGGAANTGNSN | TTACATGTCCCGTAAGGTTTC |
|        |             | 0.73135 |       |     |                      |                       |
| M00225 | V\$STAT3_01 | 4       | 7984  | (+) | NGNNATTCCSGGAARTGNNN | TTACATGTCCCGTAAGGTTTC |
|        |             | 0.87648 |       |     |                      |                       |
| M00223 | V\$STAT_01  | 1       | 7990  | (+) | TTCCCRKAA            | GTCCCGTAA             |
|        |             | 0.80312 |       |     |                      |                       |
| M00223 | V\$STAT_01  | 6       | 7990  | (-) | TTCCCRKAA            | GTCCCGTAA             |
|        |             | 0.85782 |       |     |                      |                       |
| M00223 | V\$STAT_01  | 7       | 8114  | (+) | TTCCCRKAA            | TTCTGGGCA             |
|        |             | 0.86639 |       |     |                      |                       |
| M00223 | V\$STAT_01  | 8       | 8114  | (-) | TTCCCRKAA            | TTCTGGGCA             |
|        |             | 0.86639 |       |     |                      |                       |
| M00223 | V\$STAT_01  | 8       | 8181  | (+) | TTCCCRKAA            | TTCCCAGAT             |
|        |             | 0.80312 |       |     |                      |                       |
| M00223 | V\$STAT_01  | 6       | 8181  | (-) | TTCCCRKAA            | TTCCCAGAT             |
|        |             | 0.82656 |       |     |                      |                       |
| M00223 | V\$STAT_01  | 9       | 8220  | (+) | TTCCCRKAA            | TTACAATAA             |
|        |             | 0.87849 |       |     |                      |                       |
| M00223 | V\$STAT_01  | 8       | 8220  | (-) | TTCCCRKAA            | TTACAATAA             |
|        |             | 0.72089 |       |     |                      |                       |
| M00224 | V\$STAT1_01 | 6       | 8265  | (-) | NNNSANTTCCGGAANTGNSN | ATATCCTTGCGGAACTCAAT  |
|        |             | 0.82707 |       |     |                      |                       |
| M00223 | V\$STAT_01  | 3       | 8271  | (-) | TTCCCRKAA            | TTTGCGGAA             |
|        |             | 0.82631 |       |     |                      |                       |
| M00223 | V\$STAT_01  | 7       | 8776  | (+) | TTCCCRKAA            | TTAGCAGAA             |
|        |             |         |       |     |                      |                       |
| M00223 | V\$STAT_01  | 0.87875 | 8776  | (-) | TTCCCRKAA            | TTAGCAGAA             |
|        |             | 0.79606 |       |     |                      |                       |
| M00223 | V\$STAT_01  | 8       | 8829  | (+) | TTCCCRKAA            | ATCTGGTAA             |
|        |             | 0.82253 |       |     |                      |                       |
| M00223 | V\$STAT_01  | 6       | 8829  | (-) | TTCCCRKAA            | ATCTGGTAA             |
|        |             | 0.79581 |       |     |                      |                       |
| M00223 | V\$STAT_01  | 5       | 8956  | (-) | TTCCCRKAA            | TTCTAGTAG             |
|        |             | 0.89437 |       |     |                      |                       |
| M00223 | V\$STAT_01  | 9       | 9140  | (+) | TTCCCRKAA            | TTACCGGCA             |
|        |             | 0.83992 |       |     |                      |                       |
| M00223 | V\$STAT_01  | 9       | 9140  | (-) | TTCCCRKAA            | TTACCGGCA             |
|        |             | 0.85051 |       |     |                      |                       |
| M00223 | V\$STAT_01  | 7       | 9581  | (+) | TTCCCRKAA            | TTCTTAGCA             |
|        |             | 0.81850 |       |     |                      |                       |
| M00223 | V\$STAT_01  | 3       | 9795  | (+) | TTCCCRKAA            | TTCCCAACA             |
|        |             | 0.79304 |       |     |                      |                       |
| M00223 | V\$STAT_01  | 3       | 9828  | (+) | TTCCCRKAA            | TTCTTCAAA             |
|        |             | 0.81295 |       |     |                      |                       |
| M00223 | V\$STAT_01  | 7       | 9874  | (-) | TTCCCRKAA            | TTCCAGTGA             |
|        |             | 0.73555 |       |     |                      |                       |
| M00224 | V\$STAT1_01 | 1       | 10074 | (+) | NNNSANTTCCGGAANTGNSN | CTTTACTCCTGGGAAAGGGAT |
|        |             | 0.72649 |       |     |                      |                       |
| M00224 | V\$STAT1_01 | 4       | 10074 | (-) | NNNSANTTCCGGAANTGNSN | CTTTACTCCTGGGAAAGGGAT |
|        |             | 0.74351 |       |     |                      |                       |
| M00225 | V\$STAT3_01 | 9       | 10074 | (+) | NGNNATTCCSGGAARTGNNN | CTTTACTCCTGGGAAAGGGAT |
|        |             | 0.72049 |       |     |                      |                       |
| M00225 | V\$STAT3_01 | 2       | 10074 | (-) | NGNNATTCCSGGAARTGNNN | CTTTACTCCTGGGAAAGGGAT |

|        |             |         |       |     |                       |                       |
|--------|-------------|---------|-------|-----|-----------------------|-----------------------|
|        |             | 0.80312 |       |     |                       |                       |
| M00223 | V\$STAT_01  | 6       | 10080 | (+) | TTCCCRKAA             | TCCTGGGAA             |
|        |             | 0.86816 |       |     |                       |                       |
| M00223 | V\$STAT_01  | 2       | 10080 | (-) | TTCCCRKAA             | TCCTGGGAA             |
|        |             | 0.82253 |       |     |                       |                       |
| M00223 | V\$STAT_01  | 6       | 10155 | (+) | TTCCCRKAA             | TTCTCAGAC             |
|        |             | 0.86135 |       |     |                       |                       |
| M00223 | V\$STAT_01  | 6       | 10198 | (+) | TTCCCRKAA             | TTATTATAA             |
|        |             | 0.86135 |       |     |                       |                       |
| M00223 | V\$STAT_01  | 6       | 10201 | (-) | TTCCCRKAA             | TTATAATAA             |
|        |             | 0.83362 |       |     |                       |                       |
| M00223 | V\$STAT_01  | 7       | 10486 | (+) | TTCCCRKAA             | TTCTAAGAA             |
|        |             | 0.91227 |       |     |                       |                       |
| M00223 | V\$STAT_01  | 6       | 10486 | (-) | TTCCCRKAA             | TTCTAAGAA             |
|        |             | 0.75843 |       |     |                       |                       |
| M00224 | V\$STAT1_01 | 9       | 10651 | (-) | NNNSANTTCCGGGAANTGNSN | CTCTCCTTCCCCTAATCCCTA |
|        |             | 0.95916 |       |     |                       |                       |
| M00223 | V\$STAT_01  | 3       | 10657 | (+) | TTCCCRKAA             | TTCCCCTAA             |
|        |             | 0.80690 |       |     |                       |                       |
| M00223 | V\$STAT_01  | 7       | 10657 | (-) | TTCCCRKAA             | TTCCCCTAA             |
|        |             | 0.81724 |       |     |                       |                       |
| M00223 | V\$STAT_01  | 2       | 10694 | (-) | TTCCCRKAA             | TCATGAGAA             |
|        |             | 0.88026 |       |     |                       |                       |
| M00223 | V\$STAT_01  | 2       | 10839 | (+) | TTCCCRKAA             | TTCCCAAAA             |
|        |             | 0.80690 |       |     |                       |                       |
| M00223 | V\$STAT_01  | 7       | 10839 | (-) | TTCCCRKAA             | TTCCCAAAA             |
|        |             | 0.85354 |       |     |                       |                       |
| M00223 | V\$STAT_01  | 2       | 11149 | (-) | TTCCCRKAA             | TTGTAGGAA             |
|        |             | 0.79581 |       |     |                       |                       |
| M00223 | V\$STAT_01  | 5       | 11295 | (-) | TTCCCRKAA             | ATCTAAGAA             |
|        |             | 0.85354 |       |     |                       |                       |
| M00223 | V\$STAT_01  | 2       | 11305 | (-) | TTCCCRKAA             | TTACATGAA             |
|        |             | 0.83690 |       |     |                       |                       |
| M00223 | V\$STAT_01  | 4       | 11559 | (-) | TTCCCRKAA             | TTTGAGGAA             |
|        |             | 0.79253 |       |     |                       |                       |
| M00223 | V\$STAT_01  | 8       | 11634 | (+) | TTCCCRKAA             | TTTTTATAA             |
|        |             | 0.82631 |       |     |                       |                       |
| M00223 | V\$STAT_01  | 7       | 11663 | (+) | TTCCCRKAA             | TTAACAGAA             |
|        |             | 0.80993 |       |     |                       |                       |
| M00223 | V\$STAT_01  | 2       | 11663 | (-) | TTCCCRKAA             | TTAACAGAA             |
|        |             | 0.8364  |       |     |                       |                       |
| M00223 | V\$STAT_01  | 8       | 11856 | (-) | TTCCCRKAA             | TTATAGCAA             |
|        |             | 0.79253 |       |     |                       |                       |
| M00223 | V\$STAT_01  | 8       | 11951 | (-) | TTCCCRKAA             | TTATACTAA             |
|        |             | 0.81472 |       |     |                       |                       |
| M00223 | V\$STAT_01  | 1       | 11977 | (+) | TTCCCRKAA             | TTCTTGGA              |
|        |             | 0.87068 |       |     |                       |                       |
| M00223 | V\$STAT_01  | 3       | 12190 | (+) | TTCCCRKAA             | TTCTCTCA              |
|        |             | 0.80968 |       |     |                       |                       |
| M00223 | V\$STAT_01  | 6       | 12235 | (-) | TTCCCRKAA             | TTGTAGTAA             |
|        |             | 0.82253 |       |     |                       |                       |
| M00223 | V\$STAT_01  | 6       | 12247 | (-) | TTCCCRKAA             | ATCTGAGAA             |
|        |             | 0.82682 |       |     |                       |                       |
| M00223 | V\$STAT_01  | 1       | 12276 | (+) | TTCCCRKAA             | TTCTTTGAA             |
|        |             | 0.81925 |       |     |                       |                       |
| M00223 | V\$STAT_01  | 9       | 12368 | (-) | TTCCCRKAA             | TTATGTTAA             |
|        |             | 0.81925 |       |     |                       |                       |
| M00223 | V\$STAT_01  | 9       | 12386 | (-) | TTCCCRKAA             | TTATGTTAA             |
|        |             | 0.88858 |       |     |                       |                       |
| M00223 | V\$STAT_01  | 1       | 12540 | (-) | TTCCCRKAA             | TTAGAAGAA             |
|        |             | 0.79178 |       |     |                       |                       |
| M00223 | V\$STAT_01  | 2       | 12572 | (+) | TTCCCRKAA             | TTTCTGTCA             |
|        |             | 0.88732 |       |     |                       |                       |
| M00223 | V\$STAT_01  | 5       | 12759 | (+) | TTCCCRKAA             | TTCTATCA              |
|        |             | 0.79581 |       |     |                       |                       |
| M00223 | V\$STAT_01  | 5       | 12839 | (+) | TTCCCRKAA             | GTCTTAGAA             |

|        |             |                    |       |     |                      |                        |
|--------|-------------|--------------------|-------|-----|----------------------|------------------------|
| M00223 | V\$STAT_01  | 0.88858<br>1       | 12842 | (-) | TTCCCRKAA            | TTAGAAGAA              |
| M00224 | V\$STAT1_01 | 0.72567<br>1       | 12982 | (+) | NNNSANTTCCGGAANTGNSN | TTTTTCTTTCCAGAAACAGCC  |
| M00224 | V\$STAT1_01 | 0.73653<br>9       | 12982 | (-) | NNNSANTTCCGGAANTGNSN | TTTTTCTTTCCAGAAACAGCC  |
| M00225 | V\$STAT3_01 | 0.72454<br>7       | 12982 | (-) | NGNNATTCCSGGAARTGNNN | TTTTTCTTTCCAGAAACAGCC  |
| M00224 | V\$STAT1_01 | 0.73242<br>2       | 12983 | (+) | NNNSANTTCCGGAANTGNSN | TTTTTCTTTCCAGAAACAGCCT |
| M00223 | V\$STAT_01  | 0.87017<br>9       | 12988 | (+) | TTCCCRKAA            | TTTCCAGAA              |
| M00223 | V\$STAT_01  | 0.81699<br>0.79203 | 12988 | (-) | TTCCCRKAA            | TTTCCAGAA              |
| M00223 | V\$STAT_01  | 4                  | 12989 | (+) | TTCCCRKAA            | TTCCAGAAA              |
| M00223 | V\$STAT_01  | 0.8606<br>0.88858  | 12989 | (-) | TTCCCRKAA            | TTCCAGAAA              |
| M00223 | V\$STAT_01  | 1<br>0.85152       | 13463 | (+) | TTCCCRKAA            | TTCTTCTAA              |
| M00223 | V\$STAT_01  | 5<br>0.88807       | 13690 | (+) | TTCCCRKAA            | TTATGATAA              |
| M00223 | V\$STAT_01  | 7<br>0.88858       | 13690 | (-) | TTCCCRKAA            | TTATGATAA              |
| M00223 | V\$STAT_01  | 1<br>0.79253       | 13734 | (+) | TTCCCRKAA            | TTCTTCTAA              |
| M00223 | V\$STAT_01  | 8<br>0.86135       | 14009 | (-) | TTCCCRKAA            | TTATATTAA              |
| M00223 | V\$STAT_01  | 6                  | 14049 | (+) | TTCCCRKAA            | TTATTATAA              |
| M00223 | V\$STAT_01  | 0.80968<br>0.86765 | 14156 | (-) | TTCCCRKAA            | TTACATTAA              |
| M00223 | V\$STAT_01  | 8<br>0.80312       | 14308 | (+) | TTCCCRKAA            | TTCTTGGCA              |
| M00223 | V\$STAT_01  | 6<br>0.86639       | 14337 | (+) | TTCCCRKAA            | TTCTGGGAC              |
| M00223 | V\$STAT_01  | 8<br>0.81295       | 14337 | (-) | TTCCCRKAA            | TTCTGGGAC              |
| M00223 | V\$STAT_01  | 7                  | 14525 | (+) | TTCCCRKAA            | TTCTTGGAG              |
| M00223 | V\$STAT_01  | 0.79884<br>0.80766 | 14585 | (+) | TTCCCRKAA            | GTACCCTAA              |
| M00223 | V\$STAT_01  | 3<br>0.81547       | 14617 | (+) | TTCCCRKAA            | TTACTGTGA              |
| M00223 | V\$STAT_01  | 8<br>0.80136       | 14627 | (+) | TTCCCRKAA            | TTACCATAG              |
| M00223 | V\$STAT_01  | 1<br>0.81547       | 14683 | (-) | TTCCCRKAA            | TGATGCGAA              |
| M00223 | V\$STAT_01  | 8<br>0.82253       | 14745 | (+) | TTCCCRKAA            | TTCTCATAC              |
| M00223 | V\$STAT_01  | 6<br>0.84471       | 14902 | (-) | TTCCCRKAA            | CTCTGAGAA              |
| M00223 | V\$STAT_01  | 9<br>0.72748       | 15015 | (-) | TTCCCRKAA            | TTAGAATAA              |
| M00224 | V\$STAT1_01 | 2<br>0.71035       | 15054 | (+) | NNNSANTTCCGGAANTGNSN | CTAGAATTTTCTGAAATGGAA  |
| M00225 | V\$STAT3_01 | 5<br>0.72764       | 15054 | (+) | NGNNATTCCSGGAARTGNNN | CTAGAATTTTCTGAAATGGAA  |
| M00224 | V\$STAT1_01 | 7<br>0.82631       | 15055 | (+) | NNNSANTTCCGGAANTGNSN | TAGAATTTTCTGAAATGGAAA  |
| M00223 | V\$STAT_01  | 7<br>0.72367       | 15078 | (-) | TTCCCRKAA            | TGATGATAA              |
| M00225 | V\$STAT3_01 | 8<br>0.82682       | 15356 | (-) | NGNNATTCCSGGAARTGNNN | TTTCGCTTACTTGAAATAATA  |
| M00223 | V\$STAT_01  | 1                  | 15362 | (+) | TTCCCRKAA            | TTACTTGAA              |

|        |             |         |       |                |                       |                       |
|--------|-------------|---------|-------|----------------|-----------------------|-----------------------|
|        |             | 0.79253 |       |                |                       |                       |
| M00223 | V\$STAT_01  | 8       | 15389 | (+)            | TTCCCRKAA             | TTTTTATAA             |
|        |             | 0.80312 |       |                |                       |                       |
| M00223 | V\$STAT_01  | 6       | 15437 | (+)            | TTCCCRKAA             | TGCTGGGAA             |
|        |             | 0.92109 |       |                |                       |                       |
| M00223 | V\$STAT_01  | 9       | 15437 | (-)            | TTCCCRKAA             | TGCTGGGAA             |
|        |             | 0.81547 |       |                |                       |                       |
| M00223 | V\$STAT_01  | 8       | 15540 | (-)            | TTCCCRKAA             | TTATGAGGA             |
|        |             | 0.86135 |       |                |                       |                       |
| M00223 | V\$STAT_01  | 6       | 15730 | (-)            | TTCCCRKAA             | TTATAATAA             |
|        |             | 0.79253 |       |                |                       |                       |
| M00223 | V\$STAT_01  | 8       | 15777 | (+)            | TTCCCRKAA             | TTAATATAA             |
|        |             | 0.79783 |       |                |                       |                       |
| M00223 | V\$STAT_01  | 2       | 15836 | (+)            | TTCCCRKAA             | TTCTGGTGA             |
|        |             | 0.82253 |       |                |                       |                       |
| M00223 | V\$STAT_01  | 6       | 15836 | (-)            | TTCCCRKAA             | TTCTGGTGA             |
|        |             | 0.81295 |       |                |                       |                       |
| M00223 | V\$STAT_01  | 7       | 15874 | (+)            | TTCCCRKAA             | TCACTGGAA             |
|        |             | 0.80589 |       |                |                       |                       |
| M00223 | V\$STAT_01  | 9       | 15980 | (+)            | TTCCCRKAA             | TTACTGTAT             |
|        |             | 0.82682 |       |                |                       |                       |
| M00223 | V\$STAT_01  | 1       | 16128 | (+)            | TTCCCRKAA             | TTACTGCAA             |
|        |             | 0.84976 |       |                |                       |                       |
| M00223 | V\$STAT_01  | 1       | 16162 | (+)            | TTCCCRKAA             | TGCCTGTAA             |
|        |             | 0.80262 |       |                |                       |                       |
| M00223 | V\$STAT_01  | 2       | 16510 | (+)            | TTCCCRKAA             | TTGTCCTAA             |
|        |             | 0.81295 |       |                |                       |                       |
| M00223 | V\$STAT_01  | 7       | 16535 | (-)            | TTCCCRKAA             | TTCCAGTAG             |
|        |             | 0.73966 |       |                |                       |                       |
| M00224 | V\$STAT1_01 | 7       | 16632 | (-)            | NNNSANTTCCGGGAANTGNSN | TCACCTCTCCTGTAAGTGCCA |
|        |             | 0.84976 |       |                |                       |                       |
| M00223 | V\$STAT_01  | 1       | 16638 | (+)            | TTCCCRKAA             | CTCCTGTAA             |
|        |             | 0.78035 |       |                |                       |                       |
| M00075 | V\$GATA1_01 | 5       | 2     | (+)            | SNNGATNNNN            | CTTGATCATC            |
|        |             | 0.79861 |       |                |                       |                       |
| M00075 | V\$GATA1_01 | 8       | 2     | (-)            | SNNGATNNNN            | CTTGATCATC            |
|        |             | 0.79115 |       |                |                       |                       |
| M00076 | V\$GATA2_01 | 9       | 2     | (-)            | NNNGATRNNN            | CTTGATCATC            |
|        |             | 0.80083 |       |                |                       |                       |
| M00127 | V\$GATA1_03 | 3       | 3     | (-)            | RNSNNGATAANNGN        | TTGATCATCAACCC        |
|        |             | 0.82724 |       |                |                       |                       |
| M00075 | V\$GATA1_01 | 6       | 5     | (-)            | SNNGATNNNN            | GATCATCAAC            |
|        |             | 0.78662 |       |                |                       |                       |
| M00127 | V\$GATA1_03 | 4       | 76    | (-)            | RNSNNGATAANNGN        | TATTTTATTTTCCT        |
|        |             | 0.78031 |       |                |                       |                       |
| M00126 | V\$GATA1_02 | 2       | 91    | (-)            | NNNNNGATANKGNN        | TGTCTCATCTTTAA        |
|        |             | 0.79521 |       |                |                       |                       |
| M00076 | V\$GATA2_01 | 9       | 93    | (-)            | NNNGATRNNN            | TCTCATCTTT            |
|        |             | 0.86575 |       |                |                       |                       |
| M00077 | V\$GATA3_01 | 1       | 93    | (-)            | NNGATARNG             | TCTCATCTT             |
|        |             | 0.85636 |       |                |                       |                       |
| M00075 | V\$GATA1_01 | 7       | 137   | (+)            | SNNGATNNNN            | TGTGATTGCA            |
|        |             | 0.85250 |       |                |                       |                       |
| M00076 | V\$GATA2_01 | 3       | 137   | (+)            | NNNGATRNNN            | TGTGATTGCA            |
|        |             | 0.87106 |       |                |                       |                       |
| M00077 | V\$GATA3_01 | 8       | 138   | (+)            | NNGATARNG             | GTGATTGCA             |
|        |             | 0.78845 |       |                |                       |                       |
| M00076 | V\$GATA2_01 | 3       | 160   | (-)            | NNNGATRNNN            | TCCTATGATA            |
|        |             | 0.78578 |       |                |                       |                       |
| M00075 | V\$GATA1_01 | 5       | 163   | (+)            | SNNGATNNNN            | TATGATATAC            |
|        |             | 0.83942 |       |                |                       |                       |
| M00076 | V\$GATA2_01 | 3       | 163   | (+)            | NNNGATRNNN            | TATGATATAC            |
|        |             | 0.8225  |       |                |                       |                       |
| M00126 | V\$GATA1_02 | 198     | (+)   | NNNNNGATANKGNN | ATGTTGATACTATC        |                       |
|        |             | 0.85668 |       |                |                       |                       |
| M00127 | V\$GATA1_03 | 8       | 198   | (+)            | RNSNNGATAANNGN        | ATGTTGATACTATC        |

|        |             |         |     |     |                |                |
|--------|-------------|---------|-----|-----|----------------|----------------|
|        |             | 0.84600 |     |     |                |                |
| M00075 | V\$GATA1_01 | 2       | 200 | (+) | SNNGATNNNN     | GTTGATACTA     |
|        |             | 0.79747 |     |     |                |                |
| M00076 | V\$GATA2_01 | 4       | 200 | (+) | NNNGATRNNN     | GTTGATACTA     |
|        |             | 0.84437 |     |     |                |                |
| M00126 | V\$GATA1_02 | 5       | 203 | (-) | NNNNNGATANKGNN | GATACTATCTATCT |
|        |             | 0.86844 |     |     |                |                |
| M00127 | V\$GATA1_03 | 7       | 203 | (-) | RNSNNGATAANNGN | GATACTATCTATCT |
|        |             | 0.78627 |     |     |                |                |
| M00075 | V\$GATA1_01 | 8       | 205 | (-) | SNNGATNNNN     | TACTATCTAT     |
|        |             | 0.7871  |     |     |                |                |
| M00076 | V\$GATA2_01 | 5       | 205 | (-) | NNNGATRNNN     | TACTATCTAT     |
|        |             | 0.90252 |     |     |                |                |
| M00077 | V\$GATA3_01 | 5       | 205 | (-) | NNGATARNG      | TACTATCTA      |
|        |             | 0.85399 |     |     |                |                |
| M00203 | V\$GATA_C   | 2       | 206 | (-) | NGATAAGNMNN    | ACTATCTATCT    |
|        |             | 0.77093 |     |     |                |                |
| M00126 | V\$GATA1_02 | 7       | 207 | (-) | NNNNNGATANKGNN | CTATCTATCTCAGA |
|        |             | 0.83731 |     |     |                |                |
| M00128 | V\$GATA1_04 | 6       | 207 | (-) | NNCWGATARNNNN  | CTATCTATCTCAG  |
|        |             | 0.85538 |     |     |                |                |
| M00075 | V\$GATA1_01 | 3       | 209 | (-) | SNNGATNNNN     | ATCTATCTCA     |
|        |             | 0.89896 |     |     |                |                |
| M00076 | V\$GATA2_01 | 5       | 209 | (-) | NNNGATRNNN     | ATCTATCTCA     |
|        |             | 0.89233 |     |     |                |                |
| M00077 | V\$GATA3_01 | 5       | 209 | (-) | NNGATARNG      | ATCTATCTC      |
|        |             | 0.85192 |     |     |                |                |
| M00075 | V\$GATA1_01 | 5       | 263 | (+) | SNNGATNNNN     | CCTGATCATT     |
|        |             | 0.78578 |     |     |                |                |
| M00075 | V\$GATA1_01 | 5       | 263 | (-) | SNNGATNNNN     | CCTGATCATT     |
|        |             | 0.82092 |     |     |                |                |
| M00076 | V\$GATA2_01 | 9       | 263 | (+) | NNNGATRNNN     | CCTGATCATT     |
|        |             | 0.79070 |     |     |                |                |
| M00076 | V\$GATA2_01 | 8       | 263 | (-) | NNNGATRNNN     | CCTGATCATT     |
|        |             | 0.77937 |     |     |                |                |
| M00126 | V\$GATA1_02 | 5       | 300 | (+) | NNNNNGATANKGNN | ATGTAGATACATAA |
|        |             | 0.84100 |     |     |                |                |
| M00127 | V\$GATA1_03 | 9       | 300 | (+) | RNSNNGATAANNGN | ATGTAGATACATAA |
|        |             | 0.82132 |     |     |                |                |
| M00075 | V\$GATA1_01 | 3       | 302 | (+) | SNNGATNNNN     | GTAGATACAT     |
|        |             | 0.79837 |     |     |                |                |
| M00076 | V\$GATA2_01 | 6       | 302 | (+) | NNNGATRNNN     | GTAGATACAT     |
|        |             | 0.87791 |     |     |                |                |
| M00203 | V\$GATA_C   | 2       | 304 | (+) | NGATAAGNMNN    | AGATACATAAC    |
|        |             | 0.79103 |     |     |                |                |
| M00127 | V\$GATA1_03 | 4       | 400 | (-) | RNSNNGATAANNGN | TTTGTTCATGGT   |
|        |             | 0.79201 |     |     |                |                |
| M00127 | V\$GATA1_03 | 4       | 412 | (+) | RNSNNGATAANNGN | GTGAAGATCATTC  |
|        |             | 0.80602 |     |     |                |                |
| M00075 | V\$GATA1_01 | 2       | 414 | (+) | SNNGATNNNN     | GAAGATCATT     |
|        |             | 0.82949 |     |     |                |                |
| M00076 | V\$GATA2_01 | 9       | 414 | (+) | NNNGATRNNN     | GAAGATCATT     |
|        |             | 0.78258 |     |     |                |                |
| M00076 | V\$GATA2_01 | 9       | 414 | (-) | NNNGATRNNN     | GAAGATCATT     |
|        |             | 0.77492 |     |     |                |                |
| M00075 | V\$GATA1_01 | 6       | 488 | (-) | SNNGATNNNN     | AGGAAACACC     |
|        |             | 0.79781 |     |     |                |                |
| M00126 | V\$GATA1_02 | 3       | 496 | (+) | NNNNNGATANKGNN | CCAATGATAGACAA |
|        |             | 0.80671 |     |     |                |                |
| M00127 | V\$GATA1_03 | 2       | 496 | (+) | RNSNNGATAANNGN | CCAATGATAGACAA |
|        |             | 0.82428 |     |     |                |                |
| M00075 | V\$GATA1_01 | 4       | 498 | (+) | SNNGATNNNN     | AATGATAGAC     |
|        |             | 0.84348 |     |     |                |                |
| M00076 | V\$GATA2_01 | 2       | 498 | (+) | NNNGATRNNN     | AATGATAGAC     |
|        |             | 0.85157 |     |     |                |                |
| M00077 | V\$GATA3_01 | 3       | 499 | (+) | NNGATARNG      | ATGATAGAC      |

|        |             |                |     |     |                |                |
|--------|-------------|----------------|-----|-----|----------------|----------------|
| M00203 | V\$GATA_C   | 0.88474<br>7   | 500 | (+) | NGATAAGNMNN    | TGATAGACAAT    |
| M00128 | V\$GATA1_04 | 0.84160<br>5   | 509 | (+) | NNCWGATARNNNN  | ATTAGATATAAAT  |
| M00077 | V\$GATA3_01 | 0.82233<br>1   | 511 | (+) | NNGATARNG      | TAGATATAA      |
| M00203 | V\$GATA_C   | 0.83504<br>2   | 512 | (+) | NGATAAGNMNN    | AGATATAAATG    |
| M00075 | V\$GATA1_01 | 0.78973<br>3   | 519 | (+) | SNNGATNNNN     | AATGATTACT     |
| M00076 | V\$GATA2_01 | 0.79025<br>7   | 519 | (+) | NNNGATRNNN     | AATGATTACT     |
| M00127 | V\$GATA1_03 | 0.78466<br>4   | 532 | (+) | RNSNNGATAANNGN | ATAAAGATGATTAA |
| M00075 | V\$GATA1_01 | 0.79269<br>5   | 534 | (+) | SNNGATNNNN     | AAAGATGATT     |
| M00076 | V\$GATA2_01 | 0.81867<br>4   | 534 | (+) | NNNGATRNNN     | AAAGATGATT     |
| M00075 | V\$GATA1_01 | 0.77936<br>8   | 537 | (+) | SNNGATNNNN     | GATGATTAAA     |
| M00077 | V\$GATA3_01 | 0.82144<br>4   | 538 | (+) | NNGATARNG      | ATGATTAAA      |
| M00075 | V\$GATA1_01 | 0.77887<br>5   | 548 | (+) | SNNGATNNNN     | TTGGATATTT     |
| M00076 | V\$GATA2_01 | 0.82724<br>4   | 548 | (+) | NNNGATRNNN     | TTGGATATTT     |
| M00127 | V\$GATA1_03 | 0.82386<br>1   | 558 | (+) | RNSNNGATAANNGN | ATAAGGATACAAAT |
| M00076 | V\$GATA2_01 | 0.81777<br>2   | 560 | (+) | NNNGATRNNN     | AAGGATACAA     |
| M00203 | V\$GATA_C   | 0.86455<br>4   | 562 | (+) | NGATAAGNMNN    | GGATACAAATA    |
| M00127 | V\$GATA1_03 | 0.82680<br>1   | 574 | (+) | RNSNNGATAANNGN | ATGAAAATAATAAA |
| M00075 | V\$GATA1_01 | 0.84847<br>630 | 630 | (+) | SNNGATNNNN     | GTAGATTCTG     |
| M00076 | V\$GATA2_01 | 0.7871<br>630  | 630 | (+) | NNNGATRNNN     | GTAGATTCTG     |
| M00077 | V\$GATA3_01 | 0.82454<br>6   | 631 | (+) | NNGATARNG      | TAGATTCTG      |
| M00075 | V\$GATA1_01 | 0.78973<br>3   | 669 | (-) | SNNGATNNNN     | AATAATCTGT     |
| M00076 | V\$GATA2_01 | 0.79070<br>8   | 669 | (-) | NNNGATRNNN     | AATAATCTGT     |
| M00077 | V\$GATA3_01 | 0.82720<br>4   | 669 | (-) | NNGATARNG      | AATAATCTG      |
| M00077 | V\$GATA3_01 | 0.84049<br>6   | 716 | (-) | NNGATARNG      | TATAATCTA      |
| M00127 | V\$GATA1_03 | 0.79446<br>3   | 728 | (-) | RNSNNGATAANNGN | TTTCTTATTTATCT |
| M00203 | V\$GATA_C   | 0.91177<br>4   | 731 | (-) | NGATAAGNMNN    | CTTATTTATCT    |
| M00126 | V\$GATA1_02 | 0.78531<br>3   | 732 | (-) | NNNNNGATANKGNN | TTATTTATCTGAAA |
| M00128 | V\$GATA1_04 | 0.92922<br>8   | 732 | (-) | NNCWGATARNNNN  | TTATTTATCTGAA  |
| M00075 | V\$GATA1_01 | 0.78233<br>734 | 734 | (-) | SNNGATNNNN     | ATTTATCTGA     |
| M00076 | V\$GATA2_01 | 0.84754<br>2   | 734 | (-) | NNNGATRNNN     | ATTTATCTGA     |
| M00077 | V\$GATA3_01 | 0.84093<br>9   | 734 | (-) | NNGATARNG      | ATTTATCTG      |
| M00126 | V\$GATA1_02 | 0.78593<br>8   | 815 | (+) | NNNNNGATANKGNN | AACGTGATATGTTT |
| M00128 | V\$GATA1_04 | 0.83486<br>5   | 816 | (+) | NNCWGATARNNNN  | ACGTGATATGTTT  |



|        |             |                 |      |     |                |                |
|--------|-------------|-----------------|------|-----|----------------|----------------|
| M00075 | V\$GATA1_01 | 0.94175<br>7    | 817  | (+) | SNNGATNNNN     | CGTGATATGT     |
| M00076 | V\$GATA2_01 | 0.90663<br>1    | 817  | (+) | NNNGATRNNN     | CGTGATATGT     |
| M00077 | V\$GATA3_01 | 0.84935<br>8    | 818  | (+) | NNGATARNG      | GTGATATGT      |
| M00075 | V\$GATA1_01 | 0.84452<br>1    | 843  | (-) | SNNGATNNNN     | TTCAATCATC     |
| M00076 | V\$GATA2_01 | 0.79972<br>9    | 843  | (-) | NNNGATRNNN     | TTCAATCATC     |
| M00077 | V\$GATA3_01 | 0.84980<br>1    | 843  | (-) | NNGATARNG      | TTCAATCAT      |
| M00127 | V\$GATA1_03 | 0.83782<br>5    | 844  | (-) | RNSNNGATAANNGN | TCAATCATCTTCAT |
| M00075 | V\$GATA1_01 | 0.85735<br>4    | 846  | (-) | SNNGATNNNN     | AATCATCTTC     |
| M00076 | V\$GATA2_01 | 0.86558<br>4    | 846  | (-) | NNNGATRNNN     | AATCATCTTC     |
| M00203 | V\$GATA_C   | 0.87884<br>4    | 870  | (-) | NGATAAGNMNN    | TGGATATATCA    |
| M00128 | V\$GATA1_04 | 0.81035<br>5    | 871  | (-) | NNCWGATARNNNN  | GGATATATCAACC  |
| M00203 | V\$GATA_C   | 0.86206<br>9    | 871  | (+) | NGATAAGNMNN    | GGATATATCAA    |
| M00075 | V\$GATA1_01 | 0.82082<br>9    | 873  | (-) | SNNGATNNNN     | ATATATCAAC     |
| M00075 | V\$GATA1_01 | 0.81391<br>9    | 903  | (+) | SNNGATNNNN     | CTAGATCCTT     |
| M00076 | V\$GATA2_01 | 0.78484<br>4    | 903  | (-) | NNNGATRNNN     | CTAGATCCTT     |
| M00126 | V\$GATA1_02 | 0.78281<br>3    | 939  | (+) | NNNNNGATANKGNN | GTCTACATAATGCA |
| M00127 | V\$GATA1_03 | 0.80548<br>8    | 984  | (+) | RNSNNGATAANNGN | AGCAGGCTAAAGGA |
| M00126 | V\$GATA1_02 | 0.79375<br>991  | 991  | (+) | NNNNNGATANKGNN | TAAAGGATAAAGAC |
| M00128 | V\$GATA1_04 | 0.86489<br>992  | 992  | (+) | NNCWGATARNNNN  | AAAGGATAAAGAC  |
| M00076 | V\$GATA2_01 | 0.83446<br>1    | 993  | (+) | NNNGATRNNN     | AAGGATAAAG     |
| M00077 | V\$GATA3_01 | 0.86840<br>9    | 994  | (+) | NNGATARNG      | AGGATAAAG      |
| M00203 | V\$GATA_C   | 0.94874<br>2    | 995  | (+) | NGATAAGNMNN    | GGATAAAGACA    |
| M00075 | V\$GATA1_01 | 0.81095<br>8    | 1001 | (-) | SNNGATNNNN     | AGACATCTTT     |
| M00076 | V\$GATA2_01 | 0.85250<br>3    | 1001 | (-) | NNNGATRNNN     | AGACATCTTT     |
| M00126 | V\$GATA1_02 | 0.86718<br>8    | 1017 | (+) | NNNNNGATANKGNN | TTACAGATAAAATT |
| M00128 | V\$GATA1_04 | 0.89614<br>1018 | 1018 | (+) | NNCWGATARNNNN  | TACAGATAAAATT  |
| M00076 | V\$GATA2_01 | 0.78529<br>5    | 1019 | (+) | NNNGATRNNN     | ACAGATAAAA     |
| M00077 | V\$GATA3_01 | 0.87284<br>1020 | 1020 | (+) | NNGATARNG      | CAGATAAAA      |
| M00203 | V\$GATA_C   | 0.90028<br>1021 | 1021 | (+) | NGATAAGNMNN    | AGATAAAATTA    |
| M00203 | V\$GATA_C   | 0.88257<br>2    | 1049 | (-) | NGATAAGNMNN    | TTAGTTTATCA    |
| M00126 | V\$GATA1_02 | 0.8125<br>1050  | 1050 | (-) | NNNNNGATANKGNN | TAGTTTATCAATTT |
| M00127 | V\$GATA1_03 | 0.82190<br>1    | 1050 | (-) | RNSNNGATAANNGN | TAGTTTATCAATTT |
| M00128 | V\$GATA1_04 | 0.81556<br>4    | 1050 | (-) | NNCWGATARNNNN  | TAGTTTATCAATT  |
| M00127 | V\$GATA1_03 | 0.80499<br>1072 | 1072 | (-) | RNSNNGATAANNGN | CCAATGATCTACAG |

|        |             |         |      |     |                |                |
|--------|-------------|---------|------|-----|----------------|----------------|
|        |             | 0.78349 |      |     |                |                |
| M00076 | V\$GATA2_01 | 1       | 1108 | (+) | NNNGATRNNN     | TGTCATATTT     |
|        |             | 0.83531 |      |     |                |                |
| M00126 | V\$GATA1_02 | 3       | 1137 | (+) | NNNNNGATANKGNN | ATATTGATACTTCT |
|        |             | 0.79838 |      |     |                |                |
| M00127 | V\$GATA1_03 | 3       | 1137 | (+) | RNSNNGATAANNGN | ATATTGATACTTCT |
|        |             | 0.81688 |      |     |                |                |
| M00075 | V\$GATA1_01 | 1       | 1139 | (+) | SNNGATNNNN     | ATTGATACTT     |
|        |             | 0.78033 |      |     |                |                |
| M00076 | V\$GATA2_01 | 4       | 1139 | (+) | NNNGATRNNN     | ATTGATACTT     |
|        |             |         |      |     |                |                |
| M00203 | V\$GATA_C   | 0.89593 | 1160 | (+) | NGATAAGNMNN    | TGACAAGACCT    |
|        |             | 0.78529 |      |     |                |                |
| M00075 | V\$GATA1_01 | 1       | 1183 | (-) | SNNGATNNNN     | CAGGATCAAA     |
|        |             | 0.81031 |      |     |                |                |
| M00126 | V\$GATA1_02 | 2       | 1211 | (+) | NNNNNGATANKGNN | AGTAAGATATTGGT |
|        |             | 0.86029 |      |     |                |                |
| M00128 | V\$GATA1_04 | 4       | 1212 | (+) | NNCWGATARNNNN  | GTAAGATATTGGT  |
|        |             | 0.83070 |      |     |                |                |
| M00075 | V\$GATA1_01 | 1       | 1213 | (+) | SNNGATNNNN     | TAAGATATTG     |
|        |             | 0.90753 |      |     |                |                |
| M00076 | V\$GATA2_01 | 3       | 1213 | (+) | NNNGATRNNN     | TAAGATATTG     |
|        |             | 0.90163 |      |     |                |                |
| M00077 | V\$GATA3_01 | 9       | 1214 | (+) | NNGATARNG      | AAGATATTG      |
|        |             | 0.97421 |      |     |                |                |
| M00203 | V\$GATA_C   | 6       | 1225 | (-) | NGATAAGNMNN    | ATTCTTATCT     |
|        |             | 0.84218 |      |     |                |                |
| M00126 | V\$GATA1_02 | 7       | 1226 | (-) | NNNNNGATANKGNN | TTTCTTATCTTAGA |
|        |             | 0.87101 |      |     |                |                |
| M00128 | V\$GATA1_04 | 7       | 1226 | (-) | NNCWGATARNNNN  | TTTCTTATCTTAG  |
|        |             | 0.77788 |      |     |                |                |
| M00075 | V\$GATA1_01 | 7       | 1228 | (-) | SNNGATNNNN     | TCTTATCTTA     |
|        |             | 0.85611 |      |     |                |                |
| M00076 | V\$GATA2_01 | 2       | 1228 | (-) | NNNGATRNNN     | TCTTATCTTA     |
|        |             | 0.91936 |      |     |                |                |
| M00077 | V\$GATA3_01 | 2       | 1228 | (-) | NNGATARNG      | TCTTATCTT      |
|        |             | 0.82156 |      |     |                |                |
| M00126 | V\$GATA1_02 | 2       | 1233 | (+) | NNNNNGATANKGNN | TCTTAGATAAGCAG |
|        |             | 0.83915 |      |     |                |                |
| M00128 | V\$GATA1_04 | 4       | 1234 | (+) | NNCWGATARNNNN  | CTTAGATAAGCAG  |
|        |             | 0.80063 |      |     |                |                |
| M00076 | V\$GATA2_01 | 1       | 1235 | (+) | NNNGATRNNN     | TTAGATAAGC     |
|        |             | 0.86309 |      |     |                |                |
| M00077 | V\$GATA3_01 | 3       | 1236 | (+) | NNGATARNG      | TAGATAAGC      |
|        |             | 0.91208 |      |     |                |                |
| M00203 | V\$GATA_C   | 4       | 1237 | (+) | NGATAAGNMNN    | AGATAAGCAGT    |
|        |             | 0.80181 |      |     |                |                |
| M00127 | V\$GATA1_03 | 3       | 1249 | (+) | RNSNNGATAANNGN | AGCAAAATAATTTG |
|        |             | 0.90680 |      |     |                |                |
| M00203 | V\$GATA_C   | 3       | 1334 | (-) | NGATAAGNMNN    | AACTTTTATCA    |
|        |             | 0.82187 |      |     |                |                |
| M00126 | V\$GATA1_02 | 5       | 1335 | (-) | NNNNNGATANKGNN | ACTTTTATCATAAT |
|        |             | 0.82582 |      |     |                |                |
| M00127 | V\$GATA1_03 | 1       | 1335 | (-) | RNSNNGATAANNGN | ACTTTTATCATAAT |
|        |             | 0.91513 |      |     |                |                |
| M00128 | V\$GATA1_04 | 5       | 1335 | (-) | NNCWGATARNNNN  | ACTTTTATCATAA  |
|        |             | 0.79837 |      |     |                |                |
| M00076 | V\$GATA2_01 | 6       | 1337 | (-) | NNNGATRNNN     | TTTTATCATA     |
|        |             | 0.85511 |      |     |                |                |
| M00077 | V\$GATA3_01 | 7       | 1337 | (-) | NNGATARNG      | TTTTATCAT      |
|        |             | 0.84106 |      |     |                |                |
| M00075 | V\$GATA1_01 | 6       | 1364 | (-) | SNNGATNNNN     | AAAAATCAAG     |
|        |             | 0.83845 |      |     |                |                |
| M00203 | V\$GATA_C   | 9       | 1400 | (+) | NGATAAGNMNN    | TTATAAGACCT    |

|        |             |                    |      |     |                |                |
|--------|-------------|--------------------|------|-----|----------------|----------------|
| M00075 | V\$GATA1_01 | 0.78924<br>0.79882 | 1426 | (-) | SNNGATNNNN     | ATAGATCTTG     |
| M00076 | V\$GATA2_01 | 7<br>0.79789       | 1426 | (-) | NNNGATRNNN     | ATAGATCTTG     |
| M00127 | V\$GATA1_03 | 3<br>0.79936       | 1430 | (+) | RNSNNGATAANNGN | ATCTTGACAACCAT |
| M00127 | V\$GATA1_03 | 3<br>0.79054       | 1445 | (-) | RNSNNGATAANNGN | AAACTTCTCATCCT |
| M00127 | V\$GATA1_03 | 4<br>0.80965       | 1448 | (-) | RNSNNGATAANNGN | CTTCTCATCCTTAC |
| M00076 | V\$GATA2_01 | 3<br>0.82055       | 1450 | (-) | NNNGATRNNN     | TCTCATCCTT     |
| M00077 | V\$GATA3_01 | 8<br>0.81063       | 1450 | (-) | NNGATARNG      | TCTCATCCT      |
| M00127 | V\$GATA1_03 | 2<br>0.83088       | 1454 | (-) | RNSNNGATAANNGN | ATCCTTACCTGTCT |
| M00128 | V\$GATA1_04 | 2<br>0.78664       | 1454 | (-) | NNCWGATARNNNN  | ATCCTTACCTGTC  |
| M00076 | V\$GATA2_01 | 9<br>0.77591       | 1460 | (-) | NNNGATRNNN     | ACCTGTCTTG     |
| M00075 | V\$GATA1_01 | 3<br>0.83761       | 1472 | (+) | SNNGATNNNN     | GCTGTTGCTC     |
| M00075 | V\$GATA1_01 | 1<br>0.82589       | 1514 | (+) | SNNGATNNNN     | GAAGATTCTA     |
| M00076 | V\$GATA2_01 | 1                  | 1514 | (+) | NNNGATRNNN     | GAAGATTCTA     |
| M00075 | V\$GATA1_01 | 0.84156<br>0.82971 | 1521 | (+) | SNNGATNNNN     | CTAGATTCTT     |
| M00075 | V\$GATA1_01 | 4<br>0.87821       | 1537 | (-) | SNNGATNNNN     | AGTCATCTCA     |
| M00076 | V\$GATA2_01 | 4<br>0.82329       | 1537 | (-) | NNNGATRNNN     | AGTCATCTCA     |
| M00075 | V\$GATA1_01 | 7                  | 1565 | (-) | SNNGATNNNN     | TCTCATCAAG     |
| M00126 | V\$GATA1_02 | 0.83<br>0.89141    | 1575 | (+) | NNNNNGATANKGNN | TGCAAGATATTGTA |
| M00075 | V\$GATA1_01 | 2<br>0.91655       | 1577 | (+) | SNNGATNNNN     | CAAGATATTG     |
| M00076 | V\$GATA2_01 | 4<br>0.90163       | 1577 | (+) | NNNGATRNNN     | CAAGATATTG     |
| M00077 | V\$GATA3_01 | 9                  | 1578 | (+) | NNGATARNG      | AAGATATTG      |
| M00075 | V\$GATA1_01 | 0.83613<br>0.80604 | 1600 | (+) | SNNGATNNNN     | TTTGATGGTC     |
| M00076 | V\$GATA2_01 | 4<br>0.80062       | 1600 | (+) | NNNGATRNNN     | TTTGATGGTC     |
| M00126 | V\$GATA1_02 | 5<br>0.79397       | 1627 | (+) | NNNNNGATANKGNN | GTGTTGATATTA   |
| M00127 | V\$GATA1_03 | 4<br>0.82477       | 1627 | (+) | RNSNNGATAANNGN | GTGTTGATATTA   |
| M00075 | V\$GATA1_01 | 8<br>0.78619       | 1629 | (+) | SNNGATNNNN     | GTTGATATTA     |
| M00076 | V\$GATA2_01 | 8<br>0.81596       | 1629 | (+) | NNNGATRNNN     | GTTGATATTA     |
| M00076 | V\$GATA2_01 | 8<br>0.83442       | 1646 | (-) | NNNGATRNNN     | AGTAATCCTT     |
| M00203 | V\$GATA_C   | 1<br>0.77593       | 1688 | (-) | NGATAAGNMNN    | AAGACTTA       |
| M00126 | V\$GATA1_02 | 8<br>0.81046       | 1758 | (+) | NNNNNGATANKGNN | AAAGAAATAAGGTA |
| M00075 | V\$GATA1_01 | 4<br>0.78078       | 1789 | (-) | SNNGATNNNN     | GAGCATCAAA     |
| M00076 | V\$GATA2_01 | 5<br>0.81749       | 1789 | (-) | NNNGATRNNN     | GAGCATCAAA     |
| M00127 | V\$GATA1_03 | 1                  | 1797 | (+) | RNSNNGATAANNGN | AAGAAGGTAATTAG |

|        |             |                    |      |     |                |                |
|--------|-------------|--------------------|------|-----|----------------|----------------|
| M00076 | V\$GATA2_01 | 0.78664<br>9       | 1838 | (+) | NNNGATRNNN     | TAACATATT      |
| M00076 | V\$GATA2_01 | 0.78529<br>5       | 1930 | (+) | NNNGATRNNN     | CACCATAGAC     |
| M00075 | V\$GATA1_01 | 0.84649<br>6       | 1957 | (-) | SNNGATNNNN     | TGCCATCCCT     |
| M00076 | V\$GATA2_01 | 0.88182<br>2       | 1957 | (-) | NNNGATRNNN     | TGCCATCCCT     |
| M00077 | V\$GATA3_01 | 0.82942<br>0.82625 | 1957 | (-) | NNGATARNG      | TGCCATCCC      |
| M00075 | V\$GATA1_01 | 0.86017<br>9       | 1966 | (+) | SNNGATNNNN     | TGGGATTCTC     |
| M00076 | V\$GATA2_01 | 0.82498<br>1       | 1966 | (+) | NNNGATRNNN     | TGGGATTCTC     |
| M00077 | V\$GATA3_01 | 0.79152<br>9       | 2059 | (-) | NNGATARNG      | CCCACTCTT      |
| M00127 | V\$GATA1_03 | 4                  | 2085 | (-) | RNSNNGATAANNGN | CAGCCTACCAGGCT |
| M00075 | V\$GATA1_01 | 0.78924<br>0.80503 | 2100 | (-) | SNNGATNNNN     | CTCCATCCAT     |
| M00075 | V\$GATA1_01 | 5                  | 2109 | (+) | SNNGATNNNN     | TGGGATTTTC     |
| M00076 | V\$GATA2_01 | 0.84889<br>5       | 2109 | (+) | NNNGATRNNN     | TGGGATTTTC     |
| M00127 | V\$GATA1_03 | 0.82239<br>1       | 2187 | (-) | RNSNNGATAANNGN | CAGTGTATCCACTT |
| M00075 | V\$GATA1_01 | 0.80207<br>3       | 2189 | (-) | SNNGATNNNN     | GTGTATCCAC     |
| M00076 | V\$GATA2_01 | 0.80920<br>2       | 2189 | (-) | NNNGATRNNN     | GTGTATCCAC     |
| M00075 | V\$GATA1_01 | 0.89486<br>7       | 2226 | (+) | SNNGATNNNN     | TGAGATGGCT     |
| M00076 | V\$GATA2_01 | 0.92963<br>5       | 2226 | (+) | NNNGATRNNN     | TGAGATGGCT     |
| M00077 | V\$GATA3_01 | 0.84271<br>2       | 2227 | (+) | NNGATARNG      | GAGATGGCT      |
| M00127 | V\$GATA1_03 | 0.78099<br>0.77492 | 2259 | (+) | RNSNNGATAANNGN | GTACAGAAAGTTGG |
| M00075 | V\$GATA1_01 | 6                  | 2282 | (+) | SNNGATNNNN     | ACTGATTCAA     |
| M00126 | V\$GATA1_02 | 0.8875<br>0.86599  | 2324 | (+) | NNNNNGATANKGNN | AACTAGATAATGTA |
| M00127 | V\$GATA1_03 | 7                  | 2324 | (+) | RNSNNGATAANNGN | AACTAGATAATGTA |
| M00128 | V\$GATA1_04 | 0.82781<br>9       | 2325 | (+) | NNCWGATARNNNN  | ACTAGATAATGTA  |
| M00075 | V\$GATA1_01 | 0.83711<br>7       | 2326 | (+) | SNNGATNNNN     | CTAGATAATG     |
| M00076 | V\$GATA2_01 | 0.82002<br>7       | 2326 | (+) | NNNGATRNNN     | CTAGATAATG     |
| M00077 | V\$GATA3_01 | 0.90917<br>1       | 2327 | (+) | NNGATARNG      | TAGATAATG      |
| M00203 | V\$GATA_C   | 0.86331<br>2       | 2328 | (+) | NGATAAGNMNN    | AGATAATGTAA    |
| M00126 | V\$GATA1_02 | 0.88156<br>3       | 2415 | (+) | NNNNNGATANKGNN | CTCTAGATAATGAT |
| M00127 | V\$GATA1_03 | 0.87432<br>6       | 2415 | (+) | RNSNNGATAANNGN | CTCTAGATAATGAT |
| M00128 | V\$GATA1_04 | 0.86550<br>2       | 2416 | (+) | NNCWGATARNNNN  | TCTAGATAATGAT  |
| M00075 | V\$GATA1_01 | 0.83711<br>7       | 2417 | (+) | SNNGATNNNN     | CTAGATAATG     |
| M00076 | V\$GATA2_01 | 0.82002<br>7       | 2417 | (+) | NNNGATRNNN     | CTAGATAATG     |
| M00077 | V\$GATA3_01 | 0.90917<br>1       | 2418 | (+) | NNGATARNG      | TAGATAATG      |

|        |             |         |      |     |                |                |
|--------|-------------|---------|------|-----|----------------|----------------|
|        |             | 0.89934 |      |     |                |                |
| M00203 | V\$GATA_C   | 8       | 2419 | (+) | NGATAAGNMNN    | AGATAATGATA    |
|        |             | 0.79468 |      |     |                |                |
| M00126 | V\$GATA1_02 | 7       | 2421 | (+) | NNNNNGATANKGNN | ATAATGATAAATAA |
|        |             | 0.86305 |      |     |                |                |
| M00127 | V\$GATA1_03 | 7       | 2421 | (+) | RNSNNGATAANNGN | ATAATGATAAATAA |
|        |             | 0.88449 |      |     |                |                |
| M00128 | V\$GATA1_04 | 8       | 2422 | (+) | NNCWGATARNNNN  | TAATGATAAATAA  |
|        |             | 0.77393 |      |     |                |                |
| M00075 | V\$GATA1_01 | 9       | 2423 | (+) | SNNGATNNNN     | AATGATAAAT     |
|        |             | 0.79567 |      |     |                |                |
| M00076 | V\$GATA2_01 | 0.82321 | 2423 | (+) | NNNGATRNNN     | AATGATAAAT     |
|        |             | 0.82321 |      |     |                |                |
| M00077 | V\$GATA3_01 | 7       | 2424 | (+) | NNGATARNG      | ATGATAAAT      |
|        |             | 0.93227 |      |     |                |                |
| M00203 | V\$GATA_C   | 7       | 2425 | (+) | NGATAAGNMNN    | TGATAAATAAA    |
|        |             | 0.85784 |      |     |                |                |
| M00075 | V\$GATA1_01 | 8       | 2441 | (-) | SNNGATNNNN     | AGGAATCAAC     |
|        |             | 0.78168 |      |     |                |                |
| M00076 | V\$GATA2_01 | 7       | 2441 | (-) | NNNGATRNNN     | AGGAATCAAC     |
|        |             | 0.83939 |      |     |                |                |
| M00203 | V\$GATA_C   | 1       | 2451 | (+) | NGATAAGNMNN    | TGACAAGAAAG    |
|        |             | 0.85781 |      |     |                |                |
| M00126 | V\$GATA1_02 | 3       | 2469 | (+) | NNNNNGATANKGNN | AATAAGATAATAGT |
|        |             | 0.84443 |      |     |                |                |
| M00127 | V\$GATA1_03 | 9       | 2469 | (+) | RNSNNGATAANNGN | AATAAGATAATAGT |
|        |             | 0.91268 |      |     |                |                |
| M00128 | V\$GATA1_04 | 4       | 2470 | (+) | NNCWGATARNNNN  | ATAAGATAATAGT  |
|        |             | 0.84979 |      |     |                |                |
| M00076 | V\$GATA2_01 | 7       | 2471 | (+) | NNNGATRNNN     | TAAGATAATA     |
|        |             | 0.89853 |      |     |                |                |
| M00077 | V\$GATA3_01 | 8       | 2472 | (+) | NNGATARNG      | AAGATAATA      |
|        |             | 0.87138 |      |     |                |                |
| M00203 | V\$GATA_C   | 9       | 2473 | (+) | NGATAAGNMNN    | AGATAATAGTT    |
|        |             | 0.77887 |      |     |                |                |
| M00075 | V\$GATA1_01 | 5       | 2484 | (+) | SNNGATNNNN     | TTGGATATTT     |
|        |             | 0.82724 |      |     |                |                |
| M00076 | V\$GATA2_01 | 4       | 2484 | (+) | NNNGATRNNN     | TTGGATATTT     |
|        |             | 0.82536 |      |     |                |                |
| M00128 | V\$GATA1_04 | 8       | 2501 | (-) | NNCWGATARNNNN  | CAAGCTATCAAAT  |
|        |             | 0.85093 |      |     |                |                |
| M00075 | V\$GATA1_01 | 8       | 2503 | (-) | SNNGATNNNN     | AGCTATCAAA     |
|        |             | 0.85701 |      |     |                |                |
| M00076 | V\$GATA2_01 | 4       | 2503 | (-) | NNNGATRNNN     | AGCTATCAAA     |
|        |             | 0.83119 |      |     |                |                |
| M00077 | V\$GATA3_01 | 2       | 2503 | (-) | NNGATARNG      | AGCTATCAA      |
|        |             | 0.78906 |      |     |                |                |
| M00126 | V\$GATA1_02 | 2       | 2537 | (+) | NNNNNGATANKGNN | GCTGAGATATTCTA |
|        |             | 0.83316 |      |     |                |                |
| M00075 | V\$GATA1_01 | 9       | 2539 | (+) | SNNGATNNNN     | TGAGATATTC     |
|        |             | 0.89896 |      |     |                |                |
| M00076 | V\$GATA2_01 | 3       | 2539 | (+) | NNNGATRNNN     | TGAGATATTC     |
|        |             | 0.85201 |      |     |                |                |
| M00077 | V\$GATA3_01 | 6       | 2540 | (+) | NNGATARNG      | GAGATATTC      |
|        |             | 0.785   |      |     |                |                |
| M00126 | V\$GATA1_02 | 0.79466 | 2558 | (-) | NNNNNGATANKGNN | ACTCCTATTTTCTA |
|        |             | 0.79466 |      |     |                |                |
| M00075 | V\$GATA1_01 | 9       | 2586 | (-) | SNNGATNNNN     | TAGGATCACT     |
|        |             | 0.84844 |      |     |                |                |
| M00076 | V\$GATA2_01 | 4       | 2586 | (+) | NNNGATRNNN     | TAGGATCACT     |
|        |             | 0.80083 |      |     |                |                |
| M00127 | V\$GATA1_03 | 3       | 2594 | (-) | RNSNNGATAANNGN | CTAATAATCCAGCT |
|        |             | 0.79763 |      |     |                |                |
| M00075 | V\$GATA1_01 | 1       | 2596 | (-) | SNNGATNNNN     | AATAATCCAG     |
|        |             | 0.82527 |      |     |                |                |
| M00075 | V\$GATA1_01 | 1       | 2643 | (-) | SNNGATNNNN     | AAGCATCAAA     |

|        |             |                    |      |     |                |                |
|--------|-------------|--------------------|------|-----|----------------|----------------|
| M00076 | V\$GATA2_01 | 0.78439<br>3       | 2643 | (-) | NNNGATRNNN     | AAGCATCAAA     |
| M00203 | V\$GATA_C   | 0.83845<br>9       | 2656 | (-) | NGATAAGNMNN    | AGGGAATATCT    |
| M00128 | V\$GATA1_04 | 0.85723<br>0.82527 | 2657 | (-) | NNCWGATARNNNN  | GGGAATATCTGAC  |
| M00075 | V\$GATA1_01 | 1                  | 2659 | (-) | SNNGATNNNN     | GAATATCTGA     |
| M00076 | V\$GATA2_01 | 0.89896<br>3       | 2659 | (-) | NNNGATRNNN     | GAATATCTGA     |
| M00077 | V\$GATA3_01 | 0.82897<br>7       | 2659 | (-) | NNGATARNG      | GAATATCTG      |
| M00203 | V\$GATA_C   | 0.92264<br>7       | 2721 | (-) | NGATAAGNMNN    | AGTCCATATCT    |
| M00126 | V\$GATA1_02 | 0.86187<br>5       | 2722 | (-) | NNNNNGATANKGNN | GTCCATATCTTTTC |
| M00127 | V\$GATA1_03 | 0.79397<br>4       | 2722 | (-) | RNSNNGATAANNGN | GTCCATATCTTTTC |
| M00128 | V\$GATA1_04 | 0.90410<br>5       | 2722 | (-) | NNCWGATARNNNN  | GTCCATATCTTTT  |
| M00075 | V\$GATA1_01 | 0.83465<br>0.88137 | 2724 | (-) | SNNGATNNNN     | CCATATCTTT     |
| M00076 | V\$GATA2_01 | 1                  | 2724 | (-) | NNNGATRNNN     | CCATATCTTT     |
| M00077 | V\$GATA3_01 | 0.92246<br>3       | 2724 | (-) | NNGATARNG      | CCATATCTT      |
| M00203 | V\$GATA_C   | 0.85088<br>5       | 2734 | (-) | NGATAAGNMNN    | TCCTTTTATCA    |
| M00126 | V\$GATA1_02 | 0.84406<br>3       | 2735 | (-) | NNNNNGATANKGNN | CCTTTTATCAGTGA |
| M00127 | V\$GATA1_03 | 0.79299<br>4       | 2735 | (-) | RNSNNGATAANNGN | CCTTTTATCAGTGA |
| M00128 | V\$GATA1_04 | 0.87009<br>8       | 2735 | (-) | NNCWGATARNNNN  | CCTTTTATCAGTG  |
| M00077 | V\$GATA3_01 | 0.84935<br>8       | 2737 | (-) | NNGATARNG      | TTTTATCAG      |
| M00126 | V\$GATA1_02 | 0.79125            | 2748 | (+) | NNNNNGATANKGNN | AAACAGATATAGAT |
| M00128 | V\$GATA1_04 | 0.90288<br>0.80355 | 2749 | (+) | NNCWGATARNNNN  | AACAGATATAGAT  |
| M00075 | V\$GATA1_01 | 4                  | 2750 | (+) | SNNGATNNNN     | ACAGATATAG     |
| M00076 | V\$GATA2_01 | 0.84303<br>1       | 2750 | (+) | NNNGATRNNN     | ACAGATATAG     |
| M00077 | V\$GATA3_01 | 0.87594<br>2       | 2751 | (+) | NNGATARNG      | CAGATATAG      |
| M00203 | V\$GATA_C   | 0.86859<br>3       | 2752 | (+) | NGATAAGNMNN    | AGATATAGATC    |
| M00075 | V\$GATA1_01 | 0.80898<br>3       | 2756 | (-) | SNNGATNNNN     | ATAGATCCCC     |
| M00076 | V\$GATA2_01 | 0.82679<br>3       | 2756 | (-) | NNNGATRNNN     | ATAGATCCCC     |
| M00075 | V\$GATA1_01 | 0.82922            | 2772 | (+) | SNNGATNNNN     | ACAGATTCTT     |
| M00076 | V\$GATA2_01 | 0.81687<br>0.83168 | 2772 | (+) | NNNGATRNNN     | ACAGATTCTT     |
| M00075 | V\$GATA1_01 | 8                  | 2799 | (-) | SNNGATNNNN     | AAACATCATT     |
| M00076 | V\$GATA2_01 | 0.82228<br>2       | 2799 | (-) | NNNGATRNNN     | AAACATCATT     |
| M00075 | V\$GATA1_01 | 0.81688<br>1       | 2833 | (-) | SNNGATNNNN     | ATAAATCTTG     |
| M00076 | V\$GATA2_01 | 0.79882<br>7       | 2833 | (-) | NNNGATRNNN     | ATAAATCTTG     |
| M00075 | V\$GATA1_01 | 0.89141<br>2       | 2859 | (+) | SNNGATNNNN     | GCAGATTGAG     |
| M00076 | V\$GATA2_01 | 0.86197            | 2859 | (+) | NNNGATRNNN     | GCAGATTGAG     |

|        |             |         |      |     |                |                |
|--------|-------------|---------|------|-----|----------------|----------------|
|        |             | 0.90252 |      |     |                |                |
| M00077 | V\$GATA3_01 | 5       | 2860 | (+) | NNGATARNG      | CAGATTGAG      |
|        |             | 0.79437 |      |     |                |                |
| M00126 | V\$GATA1_02 | 5       | 2890 | (+) | NNNNNGATANKGNN | TTTATGATAAAAAA |
|        |             | 0.90165 |      |     |                |                |
| M00128 | V\$GATA1_04 | 4       | 2891 | (+) | NNCWGATARNNNN  | TTATGATAAAAAA  |
|        |             | 0.79837 |      |     |                |                |
| M00076 | V\$GATA2_01 | 6       | 2892 | (+) | NNNGATRNNN     | TATGATAAAA     |
|        |             | 0.85511 |      |     |                |                |
| M00077 | V\$GATA3_01 | 7       | 2893 | (+) | NNGATARNG      | ATGATAAAA      |
|        |             | 0.93662 |      |     |                |                |
| M00203 | V\$GATA_C   | 6       | 2894 | (+) | NGATAAGNMNN    | TGATAAAAAAT    |
|        |             | 0.78035 |      |     |                |                |
| M00075 | V\$GATA1_01 | 5       | 2904 | (-) | SNNGATNNNN     | TAAAATCCAG     |
|        |             | 0.79201 |      |     |                |                |
| M00127 | V\$GATA1_03 | 4       | 2908 | (+) | RNSNNGATAANNGN | ATCCAGACAAACAA |
|        |             | 0.85243 |      |     |                |                |
| M00203 | V\$GATA_C   | 9       | 2912 | (+) | NGATAAGNMNN    | AGACAAACAAT    |
|        |             | 0.79812 |      |     |                |                |
| M00075 | V\$GATA1_01 | 4       | 2926 | (+) | SNNGATNNNN     | TCAGATTATT     |
|        |             | 0.82318 |      |     |                |                |
| M00076 | V\$GATA2_01 | 4       | 2926 | (+) | NNNGATRNNN     | TCAGATTATT     |
|        |             | 0.82720 |      |     |                |                |
| M00077 | V\$GATA3_01 | 4       | 2927 | (+) | NNGATARNG      | CAGATTATT      |
|        |             | 0.86175 |      |     |                |                |
| M00203 | V\$GATA_C   | 8       | 2933 | (-) | NGATAAGNMNN    | ATTTTTGTCT     |
|        |             | 0.78515 |      |     |                |                |
| M00127 | V\$GATA1_03 | 4       | 2947 | (-) | RNSNNGATAANNGN | TATATTTCTCCAC  |
|        |             |         |      |     |                |                |
| M00126 | V\$GATA1_02 | 0.83    | 2973 | (+) | NNNNNGATANKGNN | CAGAAGATAATTTA |
|        |             | 0.85668 |      |     |                |                |
| M00127 | V\$GATA1_03 | 8       | 2973 | (+) | RNSNNGATAANNGN | CAGAAGATAATTTA |
|        |             | 0.84926 |      |     |                |                |
| M00128 | V\$GATA1_04 | 5       | 2974 | (+) | NNCWGATARNNNN  | AGAAGATAATTTA  |
|        |             | 0.85735 |      |     |                |                |
| M00075 | V\$GATA1_01 | 4       | 2975 | (+) | SNNGATNNNN     | GAAGATAATT     |
|        |             | 0.89400 |      |     |                |                |
| M00076 | V\$GATA2_01 | 1       | 2975 | (+) | NNNGATRNNN     | GAAGATAATT     |
|        |             | 0.86663 |      |     |                |                |
| M00077 | V\$GATA3_01 | 7       | 2976 | (+) | NNGATARNG      | AAGATAATT      |
|        |             |         |      |     |                |                |
| M00203 | V\$GATA_C   | 0.85306 | 2977 | (+) | NGATAAGNMNN    | AGATAATTTAC    |
|        |             | 0.84187 |      |     |                |                |
| M00203 | V\$GATA_C   | 6       | 2996 | (-) | NGATAAGNMNN    | TATTTTTGTCA    |
|        |             | 0.78515 |      |     |                |                |
| M00127 | V\$GATA1_03 | 4       | 3014 | (-) | RNSNNGATAANNGN | TTTTTTTCTCCC   |
|        |             | 0.77531 |      |     |                |                |
| M00126 | V\$GATA1_02 | 3       | 3107 | (+) | NNNNNGATANKGNN | CTTGTGATATTATT |
|        |             | 0.83316 |      |     |                |                |
| M00075 | V\$GATA1_01 | 9       | 3109 | (+) | SNNGATNNNN     | TGTGATATTA     |
|        |             | 0.86152 |      |     |                |                |
| M00076 | V\$GATA2_01 | 5       | 3109 | (+) | NNNGATRNNN     | TGTGATATTA     |
|        |             | 0.86043 |      |     |                |                |
| M00077 | V\$GATA3_01 | 4       | 3110 | (+) | NNGATARNG      | GTGATATTA      |
|        |             | 0.81490 |      |     |                |                |
| M00075 | V\$GATA1_01 | 6       | 3177 | (-) | SNNGATNNNN     | AAACATCCTA     |
|        |             | 0.88046 |      |     |                |                |
| M00076 | V\$GATA2_01 | 9       | 3177 | (-) | NNNGATRNNN     | AAACATCCTA     |
|        |             |         |      |     |                |                |
| M00126 | V\$GATA1_02 | 0.85125 | 3180 | (-) | NNNNNGATANKGNN | CATCCTATCAAGCA |
|        |             |         |      |     |                |                |
| M00127 | V\$GATA1_03 | 0.78197 | 3180 | (-) | RNSNNGATAANNGN | CATCCTATCAAGCA |
|        |             | 0.84466 |      |     |                |                |
| M00128 | V\$GATA1_04 | 9       | 3180 | (-) | NNCWGATARNNNN  | CATCCTATCAAGC  |

|        |             |                    |      |     |                |                |
|--------|-------------|--------------------|------|-----|----------------|----------------|
| M00075 | V\$GATA1_01 | 0.88845<br>0.82363 | 3182 | (-) | SNNGATNNNN     | TCCTATCAAG     |
| M00076 | V\$GATA2_01 | 6<br>0.89986       | 3182 | (-) | NNNGATRNNN     | TCCTATCAAG     |
| M00077 | V\$GATA3_01 | 7<br>0.80651       | 3182 | (-) | NNGATARNG      | TCCTATCAA      |
| M00075 | V\$GATA1_01 | 5<br>0.78574       | 3261 | (+) | SNNGATNNNN     | AGTGATGATA     |
| M00076 | V\$GATA2_01 | 7<br>0.83872       | 3261 | (+) | NNNGATRNNN     | AGTGATGATA     |
| M00077 | V\$GATA3_01 | 4<br>0.80718       | 3262 | (+) | NNGATARNG      | GTGATGATA      |
| M00126 | V\$GATA1_02 | 7<br>0.87040       | 3262 | (+) | NNNNNGATANKGNN | GTGATGATAAATTG |
| M00127 | V\$GATA1_03 | 7<br>0.86795       | 3262 | (+) | RNSNNGATAANNGN | GTGATGATAAATTG |
| M00128 | V\$GATA1_04 | 3<br>0.83859       | 3263 | (+) | NNCWGATARNNNN  | TGATGATAAATTG  |
| M00075 | V\$GATA1_01 | 8                  | 3264 | (+) | SNNGATNNNN     | GATGATAAAT     |
| M00076 | V\$GATA2_01 | 0.84258<br>0.82321 | 3264 | (+) | NNNGATRNNN     | GATGATAAAT     |
| M00077 | V\$GATA3_01 | 7<br>0.83566       | 3265 | (+) | NNGATARNG      | ATGATAAAT      |
| M00203 | V\$GATA_C   | 3                  | 3266 | (+) | NGATAAGNMNN    | TGATAAATTGC    |
| M00126 | V\$GATA1_02 | 0.78125<br>0.86885 | 3281 | (+) | NNNNNGATANKGNN | ATATAGATTGTAGT |
| M00077 | V\$GATA3_01 | 2                  | 3284 | (+) | NNGATARNG      | TAGATTGTA      |
| M00126 | V\$GATA1_02 | 0.77625<br>0.80450 | 3303 | (-) | NNNNNGATANKGNN | TTCCTTCTCTAGAA |
| M00127 | V\$GATA1_03 | 8<br>0.86870       | 3309 | (+) | RNSNNGATAANNGN | CTCTAGAAAACAGC |
| M00075 | V\$GATA1_01 | 7<br>0.87956       | 3328 | (-) | SNNGATNNNN     | TCACATCCGC     |
| M00076 | V\$GATA2_01 | 7<br>0.83406       | 3328 | (-) | NNNGATRNNN     | TCACATCCGC     |
| M00126 | V\$GATA1_02 | 3<br>0.84007       | 3343 | (-) | NNNNNGATANKGNN | TATAATATCTTCAA |
| M00075 | V\$GATA1_01 | 9<br>0.87911       | 3345 | (-) | SNNGATNNNN     | TAATATCTTC     |
| M00076 | V\$GATA2_01 | 6<br>0.86663       | 3345 | (-) | NNNGATRNNN     | TAATATCTTC     |
| M00077 | V\$GATA3_01 | 7<br>0.78726       | 3345 | (-) | NNGATARNG      | TAATATCTT      |
| M00075 | V\$GATA1_01 | 6<br>0.79747       | 3371 | (-) | SNNGATNNNN     | ATTGATCTGC     |
| M00076 | V\$GATA2_01 | 4<br>0.82475       | 3371 | (-) | NNNGATRNNN     | ATTGATCTGC     |
| M00128 | V\$GATA1_04 | 5<br>0.82724       | 3471 | (+) | NNCWGATARNNNN  | ATAGGATATGTAT  |
| M00075 | V\$GATA1_01 | 6<br>0.91520       | 3472 | (+) | SNNGATNNNN     | TAGGATATGT     |
| M00076 | V\$GATA2_01 | 1<br>0.88070       | 3472 | (+) | NNNGATRNNN     | TAGGATATGT     |
| M00203 | V\$GATA_C   | 8<br>0.77788       | 3474 | (+) | NGATAAGNMNN    | GGATATGTATA    |
| M00075 | V\$GATA1_01 | 7<br>0.79612       | 3551 | (+) | SNNGATNNNN     | CTTGATCTCA     |
| M00076 | V\$GATA2_01 | 1<br>0.80937       | 3551 | (-) | NNNGATRNNN     | CTTGATCTCA     |
| M00126 | V\$GATA1_02 | 5<br>0.78973       | 3580 | (+) | NNNNNGATANKGNN | AATTAGATACTCTA |
| M00075 | V\$GATA1_01 | 3                  | 3582 | (+) | SNNGATNNNN     | TTAGATACTC     |



|        |             |         |      |     |                |                |
|--------|-------------|---------|------|-----|----------------|----------------|
|        |             | 0.82047 |      |     |                |                |
| M00076 | V\$GATA2_01 | 8       | 3582 | (+) | NNNGATRNNN     | TTAGATACTC     |
|        |             | 0.86206 |      |     |                |                |
| M00203 | V\$GATA_C   | 9       | 3586 | (-) | NGATAAGNMNN    | ATACTCTATCA    |
| M00126 | V\$GATA1_02 | 0.81625 | 3587 | (-) | NNNNNGATANKGNN | TACTCTATCACACA |
| M00128 | V\$GATA1_04 | 0.85723 | 3587 | (-) | NNCWGATARNNNN  | TACTCTATCACAC  |
|        |             | 0.88746 |      |     |                |                |
| M00075 | V\$GATA1_01 | 3       | 3589 | (-) | SNNGATNNNN     | CTCTATCACA     |
|        |             | 0.90076 |      |     |                |                |
| M00076 | V\$GATA2_01 | 7       | 3589 | (-) | NNNGATRNNN     | CTCTATCACA     |
|        |             | 0.93575 |      |     |                |                |
| M00077 | V\$GATA3_01 | 5       | 3589 | (-) | NNGATARNG      | CTCTATCAC      |
|        |             | 0.79417 |      |     |                |                |
| M00075 | V\$GATA1_01 | 6       | 3615 | (-) | SNNGATNNNN     | ATTAATCTTC     |
|        |             | 0.78935 |      |     |                |                |
| M00076 | V\$GATA2_01 | 5       | 3615 | (-) | NNNGATRNNN     | ATTAATCTTC     |
| M00126 | V\$GATA1_02 | 0.81125 | 3625 | (-) | NNNNNGATANKGNN | CACCGTATCCACTG |
|        |             | 0.81455 |      |     |                |                |
| M00127 | V\$GATA1_03 | 2       | 3625 | (-) | RNSNNGATAANNGN | CACCGTATCCACTG |
|        |             | 0.88005 |      |     |                |                |
| M00075 | V\$GATA1_01 | 9       | 3627 | (-) | SNNGATNNNN     | CCGTATCCAC     |
| M00076 | V\$GATA2_01 | 0.87235 | 3627 | (-) | NNNGATRNNN     | CCGTATCCAC     |
| M00077 | V\$GATA3_01 | 0.83385 | 3627 | (-) | NNGATARNG      | CCGTATCCA      |
|        |             | 0.83916 |      |     |                |                |
| M00077 | V\$GATA3_01 | 7       | 3651 | (-) | NNGATARNG      | TTTAATCTG      |
|        |             | 0.82361 |      |     |                |                |
| M00127 | V\$GATA1_03 | 6       | 3669 | (+) | RNSNNGATAANNGN | AGCCAGACAGCAGA |
|        |             | 0.78282 |      |     |                |                |
| M00075 | V\$GATA1_01 | 3       | 3678 | (+) | SNNGATNNNN     | GCAGAGAGGT     |
|        |             | 0.78564 |      |     |                |                |
| M00127 | V\$GATA1_03 | 4       | 3680 | (+) | RNSNNGATAANNGN | AGAGAGGTAAGATT |
|        |             | 0.81688 |      |     |                |                |
| M00075 | V\$GATA1_01 | 1       | 3687 | (+) | SNNGATNNNN     | TAAGATTCTT     |
|        |             | 0.84122 |      |     |                |                |
| M00076 | V\$GATA2_01 | 7       | 3687 | (+) | NNNGATRNNN     | TAAGATTCTT     |
|        |             | 0.79837 |      |     |                |                |
| M00076 | V\$GATA2_01 | 6       | 3721 | (+) | NNNGATRNNN     | TCAGTTAGCT     |
|        |             | 0.83085 |      |     |                |                |
| M00076 | V\$GATA2_01 | 3       | 3727 | (-) | NNNGATRNNN     | AGCTATGATA     |
|        |             | 0.84834 |      |     |                |                |
| M00128 | V\$GATA1_04 | 6       | 3729 | (+) | NNCWGATARNNNN  | CTATGATAAATAC  |
| M00075 | V\$GATA1_01 | 0.78233 | 3730 | (+) | SNNGATNNNN     | TATGATAAAT     |
|        |             | 0.82814 |      |     |                |                |
| M00076 | V\$GATA2_01 | 6       | 3730 | (+) | NNNGATRNNN     | TATGATAAAT     |
|        |             | 0.82321 |      |     |                |                |
| M00077 | V\$GATA3_01 | 7       | 3731 | (+) | NNGATARNG      | ATGATAAAT      |
|        |             | 0.95215 |      |     |                |                |
| M00203 | V\$GATA_C   | 9       | 3732 | (+) | NGATAAGNMNN    | TGATAAATACT    |
|        |             | 0.78270 |      |     |                |                |
| M00127 | V\$GATA1_03 | 5       | 3787 | (-) | RNSNNGATAANNGN | AATTGTATCCAGGT |
|        |             | 0.78578 |      |     |                |                |
| M00075 | V\$GATA1_01 | 5       | 3789 | (-) | SNNGATNNNN     | TTGTATCCAG     |
|        |             | 0.78466 |      |     |                |                |
| M00127 | V\$GATA1_03 | 4       | 3793 | (+) | RNSNNGATAANNGN | ATCCAGGTACTCAG |
|        |             | 0.83656 |      |     |                |                |
| M00126 | V\$GATA1_02 | 3       | 3801 | (+) | NNNNNGATANKGNN | ACTCAGATAGTTGA |
|        |             | 0.81161 |      |     |                |                |
| M00127 | V\$GATA1_03 | 2       | 3801 | (+) | RNSNNGATAANNGN | ACTCAGATAGTTGA |
|        |             | 0.83057 |      |     |                |                |
| M00128 | V\$GATA1_04 | 6       | 3802 | (+) | NNCWGATARNNNN  | CTCAGATAGTTGA  |
| M00075 | V\$GATA1_01 | 0.88696 | 3803 | (+) | SNNGATNNNN     | TCAGATAGTT     |

|        |             |         |      |     |                |                |
|--------|-------------|---------|------|-----|----------------|----------------|
|        |             | 0.93910 |      |     |                |                |
| M00076 | V\$GATA2_01 | 7       | 3803 | (+) | NNNGATRNNN     | TCAGATAGTT     |
|        |             | 0.88923 |      |     |                |                |
| M00077 | V\$GATA3_01 | 3       | 3804 | (+) | NNGATARNG      | CAGATAGTT      |
|        |             | 0.83317 |      |     |                |                |
| M00203 | V\$GATA_C   | 8       | 3805 | (+) | NGATAAGNMNN    | AGATAGTTGAT    |
|        |             | 0.80355 |      |     |                |                |
| M00075 | V\$GATA1_01 | 4       | 3810 | (+) | SNNGATNNNN     | GTTGATTACC     |
|        |             | 0.79103 |      |     |                |                |
| M00127 | V\$GATA1_03 | 4       | 3811 | (-) | RNSNNGATAANNGN | TTGATTACCCTCTC |
|        |             | 0.79562 |      |     |                |                |
| M00126 | V\$GATA1_02 | 5       | 3816 | (-) | NNNNNGATANKGNN | TACCCTCTCACTTC |
|        |             | 0.85245 |      |     |                |                |
| M00077 | V\$GATA3_01 | 9       | 3818 | (-) | NNGATARNG      | CCCTCTCAC      |
|        |             | 0.79568 |      |     |                |                |
| M00127 | V\$GATA1_03 | 8       | 3823 | (-) | RNSNNGATAANNGN | TCACTTCTCTGTTT |
|        |             | 0.81280 |      |     |                |                |
| M00128 | V\$GATA1_04 | 6       | 3823 | (-) | NNCWGATARNNNN  | TCACTTCTCTGTT  |
|        |             | 0.79470 |      |     |                |                |
| M00127 | V\$GATA1_03 | 8       | 3830 | (-) | RNSNNGATAANNGN | TCTGTTTTCATTAC |
|        |             | 0.84093 |      |     |                |                |
| M00126 | V\$GATA1_02 | 8       | 3868 | (+) | NNNNNGATANKGNN | CATTTGATAAGGAA |
|        |             | 0.91268 |      |     |                |                |
| M00128 | V\$GATA1_04 | 4       | 3869 | (+) | NNCWGATARNNNN  | ATTTGATAAGGAA  |
|        |             | 0.80947 |      |     |                |                |
| M00075 | V\$GATA1_01 | 7       | 3870 | (+) | SNNGATNNNN     | TTTGATAAGG     |
|        |             | 0.80604 |      |     |                |                |
| M00076 | V\$GATA2_01 | 4       | 3870 | (+) | NNNGATRNNN     | TTTGATAAGG     |
|        |             | 0.90651 |      |     |                |                |
| M00077 | V\$GATA3_01 | 3       | 3871 | (+) | NNGATARNG      | TTGATAAGG      |
|        |             | 0.93227 |      |     |                |                |
| M00203 | V\$GATA_C   | 7       | 3872 | (+) | NGATAAGNMNN    | TGATAAGGAAG    |
|        |             |         |      |     |                |                |
| M00126 | V\$GATA1_02 | 0.80875 | 3900 | (+) | NNNNNGATANKGNN | GGCCTGATAAAGAA |
|        |             | 0.88167 |      |     |                |                |
| M00127 | V\$GATA1_03 | 6       | 3900 | (+) | RNSNNGATAANNGN | GGCCTGATAAAGAA |
|        |             | 0.93198 |      |     |                |                |
| M00128 | V\$GATA1_04 | 5       | 3901 | (+) | NNCWGATARNNNN  | GCCTGATAAAGAA  |
|        |             | 0.87512 |      |     |                |                |
| M00075 | V\$GATA1_01 | 3       | 3902 | (+) | SNNGATNNNN     | CCTGATAAAG     |
|        |             | 0.85836 |      |     |                |                |
| M00076 | V\$GATA2_01 | 7       | 3902 | (+) | NNNGATRNNN     | CCTGATAAAG     |
|        |             |         |      |     |                |                |
| M00077 | V\$GATA3_01 | 0.88436 | 3903 | (+) | NNGATARNG      | CTGATAAAG      |
|        |             | 0.90587 |      |     |                |                |
| M00203 | V\$GATA_C   | 1       | 3904 | (+) | NGATAAGNMNN    | TGATAAAGAAG    |
|        |             | 0.78874 |      |     |                |                |
| M00075 | V\$GATA1_01 | 6       | 3917 | (-) | SNNGATNNNN     | ACCAAACATG     |
|        |             | 0.78084 |      |     |                |                |
| M00075 | V\$GATA1_01 | 9       | 3936 | (+) | SNNGATNNNN     | TCAGATTTTA     |
|        |             |         |      |     |                |                |
| M00076 | V\$GATA2_01 | 0.8083  | 3936 | (+) | NNNGATRNNN     | TCAGATTTTA     |
|        |             | 0.82720 |      |     |                |                |
| M00077 | V\$GATA3_01 | 4       | 3937 | (+) | NNGATARNG      | CAGATTTTA      |
|        |             | 0.78084 |      |     |                |                |
| M00075 | V\$GATA1_01 | 9       | 3949 | (-) | SNNGATNNNN     | TAAAATCATA     |
|        |             | 0.78890 |      |     |                |                |
| M00076 | V\$GATA2_01 | 4       | 3949 | (-) | NNNGATRNNN     | TAAAATCATA     |
|        |             | 0.84995 |      |     |                |                |
| M00203 | V\$GATA_C   | 3       | 3967 | (-) | NGATAAGNMNN    | ACTAATTATCT    |
|        |             | 0.83906 |      |     |                |                |
| M00126 | V\$GATA1_02 | 2       | 3968 | (-) | NNNNNGATANKGNN | CTAATTATCTCTTA |
|        |             | 0.79813 |      |     |                |                |
| M00127 | V\$GATA1_03 | 8       | 3968 | (-) | RNSNNGATAANNGN | CTAATTATCTCTTA |

|        |             |                    |      |     |                |                |
|--------|-------------|--------------------|------|-----|----------------|----------------|
| M00128 | V\$GATA1_04 | 0.89246<br>3       | 3968 | (-) | NNCWGATARNNNN  | CTAATTATCTCTT  |
| M00075 | V\$GATA1_01 | 0.82132<br>3       | 3970 | (-) | SNNGATNNNN     | AATTATCTCT     |
| M00076 | V\$GATA2_01 | 0.85521<br>0.88391 | 3970 | (-) | NNNGATRNNN     | AATTATCTCT     |
| M00077 | V\$GATA3_01 | 7                  | 3970 | (-) | NNGATARNG      | AATTATCTC      |
| M00127 | V\$GATA1_03 | 0.78001<br>0.90338 | 4007 | (+) | RNSNNGATAANNGN | ACCTAAATAAATGG |
| M00203 | V\$GATA_C   | 6<br>0.85031       | 4144 | (-) | NGATAAGNMNN    | AAGTATTATCT    |
| M00126 | V\$GATA1_02 | 3<br>0.88265       | 4145 | (-) | NNNNNGATANKGNN | AGTATTATCTACTT |
| M00127 | V\$GATA1_03 | 6<br>0.86335       | 4145 | (-) | RNSNNGATAANNGN | AGTATTATCTACTT |
| M00128 | V\$GATA1_04 | 8<br>0.78578       | 4145 | (-) | NNCWGATARNNNN  | AGTATTATCTACT  |
| M00075 | V\$GATA1_01 | 5<br>0.78258       | 4147 | (-) | SNNGATNNNN     | TATTATCTAC     |
| M00076 | V\$GATA2_01 | 9<br>0.87416       | 4147 | (-) | NNNGATRNNN     | TATTATCTAC     |
| M00077 | V\$GATA3_01 | 9<br>0.83662       | 4147 | (-) | NNGATARNG      | TATTATCTA      |
| M00075 | V\$GATA1_01 | 4<br>0.78539       | 4188 | (-) | SNNGATNNNN     | AAAAATCAAC     |
| M00127 | V\$GATA1_03 | 9<br>0.80153       | 4351 | (-) | RNSNNGATAANNGN | ACACTTATGCTGTC |
| M00076 | V\$GATA2_01 | 4<br>0.87549       | 4353 | (-) | NNNGATRNNN     | ACTTATGCTG     |
| M00077 | V\$GATA3_01 | 8<br>0.78187       | 4370 | (-) | NNGATARNG      | CATAATCTA      |
| M00126 | V\$GATA1_02 | 5<br>0.80450       | 4395 | (-) | NNNNNGATANKGNN | TCCATTCTCATTAT |
| M00127 | V\$GATA1_03 | 8<br>0.78258       | 4395 | (-) | RNSNNGATAANNGN | TCCATTCTCATTAT |
| M00076 | V\$GATA2_01 | 9<br>0.81194       | 4403 | (-) | NNNGATRNNN     | CATTATGATG     |
| M00075 | V\$GATA1_01 | 5                  | 4406 | (+) | SNNGATNNNN     | TATGATGGAA     |
| M00076 | V\$GATA2_01 | 0.82138<br>0.82986 | 4406 | (+) | NNNGATRNNN     | TATGATGGAA     |
| M00077 | V\$GATA3_01 | 3<br>0.94128       | 4407 | (+) | NNGATARNG      | ATGATGGAA      |
| M00203 | V\$GATA_C   | 6<br>0.95718       | 4418 | (-) | NGATAAGNMNN    | TTCTCTTATCT    |
| M00126 | V\$GATA1_02 | 7<br>0.91768       | 4419 | (-) | NNNNNGATANKGNN | TCTCTTATCTCTAC |
| M00127 | V\$GATA1_03 | 7<br>0.91727       | 4419 | (-) | RNSNNGATAANNGN | TCTCTTATCTCTAC |
| M00128 | V\$GATA1_04 | 9<br>0.79812       | 4419 | (-) | NNCWGATARNNNN  | TCTCTTATCTCTA  |
| M00075 | V\$GATA1_01 | 4<br>0.83175       | 4421 | (-) | SNNGATNNNN     | TCTTATCTCT     |
| M00076 | V\$GATA2_01 | 5<br>0.93664       | 4421 | (-) | NNNGATRNNN     | TCTTATCTCT     |
| M00077 | V\$GATA3_01 | 2<br>0.85192       | 4421 | (-) | NNGATARNG      | TCTTATCTC      |
| M00075 | V\$GATA1_01 | 5<br>0.81416       | 4439 | (+) | SNNGATNNNN     | CTGGATGTGT     |
| M00076 | V\$GATA2_01 | 3<br>0.78479       | 4439 | (+) | NNNGATRNNN     | CTGGATGTGT     |
| M00075 | V\$GATA1_01 | 8                  | 4524 | (+) | SNNGATNNNN     | AAAGATTGTC     |
| M00076 | V\$GATA2_01 | 0.80018            | 4524 | (+) | NNNGATRNNN     | AAAGATTGTC     |

|        |             |              |      |     |                |                |
|--------|-------------|--------------|------|-----|----------------|----------------|
| M00077 | V\$GATA3_01 | 0.82188<br>7 | 4525 | (+) | NNGATARNG      | AAGATTGTC      |
| M00075 | V\$GATA1_01 | 0.80799<br>6 | 4555 | (+) | SNNGATNNNN     | AATGATTTTT     |
| M00076 | V\$GATA2_01 | 0.78619<br>8 | 4555 | (+) | NNNGATRNNN     | AATGATTTTT     |
| M00077 | V\$GATA3_01 | 0.86486<br>5 | 4567 | (-) | NNGATARNG      | TATAATCTT      |
| M00127 | V\$GATA1_03 | 0.81063<br>2 | 4606 | (+) | RNSNNGATAANNGN | AGAAAGGTAAGAAA |
| M00203 | V\$GATA_C   | 0.83069<br>3 | 4610 | (+) | NGATAAGNMNN    | AGGTAAGAAAT    |
| M00075 | V\$GATA1_01 | 0.83662<br>4 | 4709 | (-) | SNNGATNNNN     | AAAAATCACT     |
| M00076 | V\$GATA2_01 | 0.79431<br>7 | 4709 | (-) | NNNGATRNNN     | AAAAATCACT     |
| M00075 | V\$GATA1_01 | 0.81342<br>5 | 4750 | (-) | SNNGATNNNN     | AGAGATCAAG     |
| M00126 | V\$GATA1_02 | 0.79968<br>7 | 4754 | (+) | NNNNNGATANKGNN | ATCAAGATAACTCA |
| M00127 | V\$GATA1_03 | 0.89588<br>4 | 4754 | (+) | RNSNNGATAANNGN | ATCAAGATAACTCA |
| M00128 | V\$GATA1_04 | 0.88204<br>7 | 4755 | (+) | NNCWGATARNNNN  | TCAAGATAACTCA  |
| M00075 | V\$GATA1_01 | 0.86179<br>7 | 4756 | (+) | SNNGATNNNN     | CAAGATAACT     |
| M00076 | V\$GATA2_01 | 0.90753<br>3 | 4756 | (+) | NNNGATRNNN     | CAAGATAACT     |
| M00077 | V\$GATA3_01 | 0.85068<br>7 | 4757 | (+) | NNGATARNG      | AAGATAACT      |
| M00203 | V\$GATA_C   | 0.87014<br>6 | 4758 | (+) | NGATAAGNMNN    | AGATAACTCAG    |
| M00127 | V\$GATA1_03 | 0.78931<br>9 | 4781 | (+) | RNSNNGATAANNGN | AACAAGATGAAAGA |
| M00075 | V\$GATA1_01 | 0.78677<br>2 | 4783 | (+) | SNNGATNNNN     | CAAGATGAAA     |
| M00076 | V\$GATA2_01 | 0.79025<br>7 | 4783 | (+) | NNNGATRNNN     | CAAGATGAAA     |
| M00077 | V\$GATA3_01 | 0.82498<br>9 | 4784 | (+) | NNGATARNG      | AAGATGAAA      |
| M00126 | V\$GATA1_02 | 0.84468<br>8 | 4788 | (+) | NNNNNGATANKGNN | TGAAAGATAATAAT |
| M00127 | V\$GATA1_03 | 0.81724<br>6 | 4788 | (+) | RNSNNGATAANNGN | TGAAAGATAATAAT |
| M00128 | V\$GATA1_04 | 0.88970<br>6 | 4789 | (+) | NNCWGATARNNNN  | GAAAGATAATAAT  |
| M00076 | V\$GATA2_01 | 0.81732<br>1 | 4790 | (+) | NNNGATRNNN     | AAAGATAATA     |
| M00077 | V\$GATA3_01 | 0.89853<br>8 | 4791 | (+) | NNGATARNG      | AAGATAATA      |
| M00127 | V\$GATA1_03 | 0.82116<br>6 | 4791 | (+) | RNSNNGATAANNGN | AAGATAATAATAGT |
| M00203 | V\$GATA_C   | 0.89251<br>3 | 4792 | (+) | NGATAAGNMNN    | AGATAATAATA    |
| M00126 | V\$GATA1_02 | 0.82968<br>8 | 4886 | (+) | NNNNNGATANKGNN | AAGGAGATAACGCA |
| M00127 | V\$GATA1_03 | 0.90568<br>3 | 4886 | (+) | RNSNNGATAANNGN | AAGGAGATAACGCA |
| M00128 | V\$GATA1_04 | 0.90808<br>8 | 4887 | (+) | NNCWGATARNNNN  | AGGAGATAACGCA  |
| M00075 | V\$GATA1_01 | 0.89733<br>5 | 4888 | (+) | SNNGATNNNN     | GGAGATAACG     |
| M00076 | V\$GATA2_01 | 0.93414<br>5 | 4888 | (+) | NNNGATRNNN     | GGAGATAACG     |
| M00077 | V\$GATA3_01 | 0.93486<br>9 | 4889 | (+) | NNGATARNG      | GAGATAACG      |

|        |             |         |      |     |                |                |
|--------|-------------|---------|------|-----|----------------|----------------|
|        |             | 0.90711 |      |     |                |                |
| M00203 | V\$GATA_C   | 4       | 4890 | (+) | NGATAAGNMNN    | AGATAACGCAA    |
|        |             | 0.85812 |      |     |                |                |
| M00126 | V\$GATA1_02 | 5       | 4901 | (+) | NNNNNGATANKGN  | GAAATGATATTGCA |
|        |             | 0.83149 |      |     |                |                |
| M00128 | V\$GATA1_04 | 5       | 4902 | (+) | NNCWGATARNNNN  | AAATGATATTGCA  |
| M00075 | V\$GATA1_01 | 0.84304 | 4903 | (+) | SNNGATNNNN     | AATGATATTG     |
| M00076 | V\$GATA2_01 | 0.86378 | 4903 | (+) | NNNGATRNNN     | AATGATATTG     |
|        |             | 0.87815 |      |     |                |                |
| M00077 | V\$GATA3_01 | 7       | 4904 | (+) | NNGATARNG      | ATGATATTG      |
|        |             | 0.80108 |      |     |                |                |
| M00075 | V\$GATA1_01 | 6       | 4974 | (+) | SNNGATNNNN     | TAAGATACAT     |
|        |             | 0.86558 |      |     |                |                |
| M00076 | V\$GATA2_01 | 4       | 4974 | (+) | NNNGATRNNN     | TAAGATACAT     |
|        |             | 0.83628 |      |     |                |                |
| M00203 | V\$GATA_C   | 5       | 4976 | (+) | NGATAAGNMNN    | AGATACATTTC    |
|        |             | 0.85784 |      |     |                |                |
| M00128 | V\$GATA1_04 | 3       | 4988 | (+) | NNCWGATARNNNN  | TACAGATATCCAT  |
|        |             | 0.81688 |      |     |                |                |
| M00075 | V\$GATA1_01 | 1       | 4989 | (+) | SNNGATNNNN     | ACAGATATCC     |
|        |             | 0.88543 |      |     |                |                |
| M00076 | V\$GATA2_01 | 1       | 4989 | (+) | NNNGATRNNN     | ACAGATATCC     |
|        |             | 0.78882 |      |     |                |                |
| M00127 | V\$GATA1_03 | 9       | 4989 | (-) | RNSNNGATAANNGN | ACAGATATCCATCC |
|        |             | 0.77048 |      |     |                |                |
| M00075 | V\$GATA1_01 | 4       | 4991 | (-) | SNNGATNNNN     | AGATATCCAT     |
|        |             | 0.81371 |      |     |                |                |
| M00076 | V\$GATA2_01 | 2       | 4991 | (-) | NNNGATRNNN     | AGATATCCAT     |
|        |             | 0.77788 |      |     |                |                |
| M00075 | V\$GATA1_01 | 7       | 4995 | (-) | SNNGATNNNN     | ATCCATCCAT     |
|        |             | 0.81014 |      |     |                |                |
| M00127 | V\$GATA1_03 | 2       | 5017 | (-) | RNSNNGATAANNGN | CTTCTTTTCTGTCC |
|        |             | 0.82322 |      |     |                |                |
| M00128 | V\$GATA1_04 | 3       | 5017 | (-) | NNCWGATARNNNN  | CTTCTTTTCTGTC  |
|        |             | 0.78084 |      |     |                |                |
| M00075 | V\$GATA1_01 | 9       | 5038 | (-) | SNNGATNNNN     | GAACATCAAT     |
|        |             | 0.82263 |      |     |                |                |
| M00127 | V\$GATA1_03 | 6       | 5063 | (+) | RNSNNGATAANNGN | AGGAACATAAATGA |
|        |             | 0.78218 |      |     |                |                |
| M00126 | V\$GATA1_02 | 8       | 5070 | (+) | NNNNNGATANKGN  | TAAATGATATTTAA |
|        |             | 0.81832 |      |     |                |                |
| M00128 | V\$GATA1_04 | 1       | 5071 | (+) | NNCWGATARNNNN  | AAATGATATTTAA  |
|        |             | 0.83168 |      |     |                |                |
| M00075 | V\$GATA1_01 | 8       | 5072 | (+) | SNNGATNNNN     | AATGATATTT     |
|        |             | 0.85069 |      |     |                |                |
| M00076 | V\$GATA2_01 | 9       | 5072 | (+) | NNNGATRNNN     | AATGATATTT     |
|        |             | 0.82773 |      |     |                |                |
| M00075 | V\$GATA1_01 | 9       | 5102 | (-) | SNNGATNNNN     | CAAAATCATA     |
|        |             | 0.83175 |      |     |                |                |
| M00076 | V\$GATA2_01 | 5       | 5102 | (-) | NNNGATRNNN     | CAAAATCATA     |
|        |             | 0.84448 |      |     |                |                |
| M00077 | V\$GATA3_01 | 4       | 5102 | (-) | NNGATARNG      | CAAAATCAT      |
|        |             | 0.78775 |      |     |                |                |
| M00075 | V\$GATA1_01 | 9       | 5168 | (+) | SNNGATNNNN     | AGTGATGAAC     |
|        |             | 0.88156 |      |     |                |                |
| M00126 | V\$GATA1_02 | 3       | 5177 | (+) | NNNNNGATANKGN  | CTCAAGATAATGAA |
|        |             | 0.89049 |      |     |                |                |
| M00127 | V\$GATA1_03 | 5       | 5177 | (+) | RNSNNGATAANNGN | CTCAAGATAATGAA |
|        |             | 0.89031 |      |     |                |                |
| M00128 | V\$GATA1_04 | 9       | 5178 | (+) | NNCWGATARNNNN  | TCAAGATAATGAA  |
|        |             | 0.87314 |      |     |                |                |
| M00075 | V\$GATA1_01 | 9       | 5179 | (+) | SNNGATNNNN     | CAAGATAATG     |
|        |             | 0.90166 |      |     |                |                |
| M00076 | V\$GATA2_01 | 9       | 5179 | (+) | NNNGATRNNN     | CAAGATAATG     |

|        |             |                    |      |     |                |                |
|--------|-------------|--------------------|------|-----|----------------|----------------|
| M00077 | V\$GATA3_01 | 0.93354<br>0.90214 | 5180 | (+) | NNGATARNG      | AAGATAATG      |
| M00203 | V\$GATA_C   | 4<br>0.78515       | 5181 | (+) | NGATAAGNMNN    | AGATAATGAAA    |
| M00127 | V\$GATA1_03 | 4                  | 5186 | (+) | RNSNNGATAANNGN | ATGAAAATACGAAA |
| M00076 | V\$GATA2_01 | 0.80424<br>0.81095 | 5212 | (-) | NNNGATRNNN     | TGGTATGTCG     |
| M00075 | V\$GATA1_01 | 8<br>0.79206       | 5304 | (+) | SNNGATNNNN     | ACTGATGAGA     |
| M00076 | V\$GATA2_01 | 1<br>0.83650       | 5304 | (+) | NNNGATRNNN     | ACTGATGAGA     |
| M00077 | V\$GATA3_01 | 9<br>0.79431       | 5305 | (+) | NNGATARNG      | CTGATGAGA      |
| M00076 | V\$GATA2_01 | 7                  | 5309 | (+) | NNNGATRNNN     | TGAGATCTAC     |
| M00126 | V\$GATA1_02 | 0.80125<br>0.89996 | 5364 | (+) | NNNNNGATANKGNN | GAAGAGACAAGGCA |
| M00203 | V\$GATA_C   | 9<br>0.82812       | 5368 | (+) | NGATAAGNMNN    | AGACAAGGCAT    |
| M00126 | V\$GATA1_02 | 5<br>0.84370       | 5393 | (+) | NNNNNGATANKGNN | GAATGGATAAAAGA |
| M00127 | V\$GATA1_03 | 4<br>0.90090       | 5393 | (+) | RNSNNGATAANNGN | GAATGGATAAAAGA |
| M00203 | V\$GATA_C   | 1<br>0.78466       | 5397 | (+) | NGATAAGNMNN    | GGATAAAAGAA    |
| M00127 | V\$GATA1_03 | 4<br>0.83316       | 5432 | (-) | RNSNNGATAANNGN | CAGACTATTTTCAC |
| M00075 | V\$GATA1_01 | 9<br>0.86179       | 5444 | (+) | SNNGATNNNN     | ACTGATCGCC     |
| M00075 | V\$GATA1_01 | 7<br>0.84618       | 5444 | (-) | SNNGATNNNN     | ACTGATCGCC     |
| M00076 | V\$GATA2_01 | 9<br>0.84077       | 5444 | (+) | NNNGATRNNN     | ACTGATCGCC     |
| M00076 | V\$GATA2_01 | 6                  | 5444 | (-) | NNNGATRNNN     | ACTGATCGCC     |
| M00128 | V\$GATA1_04 | 0.85723<br>0.85686 | 5491 | (-) | NNCWGATARNNNN  | CAATATATCTGCT  |
| M00075 | V\$GATA1_01 | 1<br>0.87686       | 5493 | (-) | SNNGATNNNN     | ATATATCTGC     |
| M00076 | V\$GATA2_01 | 1<br>0.83156       | 5493 | (-) | NNNGATRNNN     | ATATATCTGC     |
| M00126 | V\$GATA1_02 | 2                  | 5645 | (-) | NNNNNGATANKGNN | CTAAGTATCTTTTC |
| M00127 | V\$GATA1_03 | 0.83268<br>0.83218 | 5645 | (-) | RNSNNGATAANNGN | CTAAGTATCTTTTC |
| M00075 | V\$GATA1_01 | 2<br>0.87325       | 5647 | (-) | SNNGATNNNN     | AAGTATCTTT     |
| M00076 | V\$GATA2_01 | 2<br>0.78656       | 5647 | (-) | NNNGATRNNN     | AAGTATCTTT     |
| M00126 | V\$GATA1_02 | 3<br>0.83978       | 5661 | (+) | NNNNNGATANKGNN | GGCAGGATATTGGG |
| M00127 | V\$GATA1_03 | 4<br>0.88696       | 5661 | (+) | RNSNNGATAANNGN | GGCAGGATATTGGG |
| M00075 | V\$GATA1_01 | 9<br>0.93098       | 5663 | (+) | SNNGATNNNN     | CAGGATATTG     |
| M00076 | V\$GATA2_01 | 8<br>0.85644       | 5663 | (+) | NNNGATRNNN     | CAGGATATTG     |
| M00077 | V\$GATA3_01 | 7<br>0.81688       | 5664 | (+) | NNGATARNG      | AGGATATTG      |
| M00075 | V\$GATA1_01 | 1<br>0.84122       | 5691 | (+) | SNNGATNNNN     | TAAGATTCTT     |
| M00076 | V\$GATA2_01 | 7<br>0.79103       | 5691 | (+) | NNNGATRNNN     | TAAGATTCTT     |
| M00127 | V\$GATA1_03 | 4                  | 5725 | (+) | RNSNNGATAANNGN | ATAATGAAAAGAAA |

|        |             |         |      |     |                 |                |
|--------|-------------|---------|------|-----|-----------------|----------------|
|        |             | 0.81490 |      |     |                 |                |
| M00075 | V\$GATA1_01 | 6       | 5747 | (-) | SNNGATNNNN      | AAATATCCTA     |
|        |             | 0.90888 |      |     |                 |                |
| M00076 | V\$GATA2_01 | 6       | 5747 | (-) | NNNGATRNNN      | AAATATCCTA     |
|        |             | 0.78578 |      |     |                 |                |
| M00075 | V\$GATA1_01 | 5       | 5753 | (-) | SNNGATNNNN      | CCTAATCAAA     |
| M00077 | V\$GATA3_01 | 0.87284 | 5753 | (-) | NNGATARNG       | CCTAATCAA      |
|        |             | 0.78437 |      |     |                 |                |
| M00126 | V\$GATA1_02 | 5       | 5758 | (-) | NNNNNGATANKGNN  | TCAAATATCCTTTA |
|        |             | 0.80651 |      |     |                 |                |
| M00075 | V\$GATA1_01 | 5       | 5760 | (-) | SNNGATNNNN      | AAATATCCTT     |
| M00076 | V\$GATA2_01 | 0.87641 | 5760 | (-) | NNNGATRNNN      | AAATATCCTT     |
| M00075 | V\$GATA1_01 | 0.83613 | 5771 | (-) | SNNGATNNNN      | AAGTATCCTA     |
|        |             | 0.92016 |      |     |                 |                |
| M00076 | V\$GATA2_01 | 2       | 5771 | (-) | NNNGATRNNN      | AAGTATCCTA     |
|        |             | 0.79103 |      |     |                 |                |
| M00127 | V\$GATA1_03 | 4       | 5775 | (-) | RNSNNGATAANNNGN | ATCCTAATCAAGAT |
|        |             | 0.84649 |      |     |                 |                |
| M00075 | V\$GATA1_01 | 6       | 5777 | (-) | SNNGATNNNN      | CCTAATCAAG     |
| M00077 | V\$GATA3_01 | 0.87284 | 5777 | (-) | NNGATARNG       | CCTAATCAA      |
|        |             | 0.79617 |      |     |                 |                |
| M00127 | V\$GATA1_03 | 8       | 5781 | (+) | RNSNNGATAANNNGN | ATCAAGATGAATGA |
| M00075 | V\$GATA1_01 | 0.82231 | 5783 | (+) | SNNGATNNNN      | CAAGATGAAT     |
|        |             | 0.82002 |      |     |                 |                |
| M00076 | V\$GATA2_01 | 7       | 5783 | (+) | NNNGATRNNN      | CAAGATGAAT     |
|        |             | 0.87193 |      |     |                 |                |
| M00128 | V\$GATA1_04 | 6       | 5819 | (+) | NNCWGATARNNNN   | AACAGATATCTCT  |
|        |             | 0.83168 |      |     |                 |                |
| M00075 | V\$GATA1_01 | 8       | 5820 | (+) | SNNGATNNNN      | ACAGATATCT     |
|        |             | 0.88903 |      |     |                 |                |
| M00076 | V\$GATA2_01 | 9       | 5820 | (+) | NNNGATRNNN      | ACAGATATCT     |
| M00126 | V\$GATA1_02 | 0.81125 | 5820 | (-) | NNNNNGATANKGNN  | ACAGATATCTCTAA |
|        |             | 0.83578 |      |     |                 |                |
| M00128 | V\$GATA1_04 | 4       | 5820 | (-) | NNCWGATARNNNN   | ACAGATATCTCTA  |
|        |             | 0.83958 |      |     |                 |                |
| M00075 | V\$GATA1_01 | 5       | 5822 | (-) | SNNGATNNNN      | AGATATCTCT     |
|        |             | 0.88903 |      |     |                 |                |
| M00076 | V\$GATA2_01 | 9       | 5822 | (-) | NNNGATRNNN      | AGATATCTCT     |
|        |             | 0.83606 |      |     |                 |                |
| M00077 | V\$GATA3_01 | 6       | 5822 | (-) | NNGATARNG       | AGATATCTC      |
|        |             | 0.88804 |      |     |                 |                |
| M00127 | V\$GATA1_03 | 5       | 5875 | (+) | RNSNNGATAANNNGN | GGCTGGATAACTAA |
|        |             | 0.82132 |      |     |                 |                |
| M00075 | V\$GATA1_01 | 3       | 5877 | (+) | SNNGATNNNN      | CTGGATAACT     |
|        |             | 0.84032 |      |     |                 |                |
| M00076 | V\$GATA2_01 | 5       | 5877 | (+) | NNNGATRNNN      | CTGGATAACT     |
|        |             | 0.88288 |      |     |                 |                |
| M00203 | V\$GATA_C   | 3       | 5879 | (+) | NGATAAGNMNN     | GGATAACTAAA    |
|        |             | 0.80243 |      |     |                 |                |
| M00076 | V\$GATA2_01 | 6       | 5891 | (+) | NNNGATRNNN      | CAACATAGTA     |
|        |             | 0.82675 |      |     |                 |                |
| M00075 | V\$GATA1_01 | 2       | 5918 | (-) | SNNGATNNNN      | ATGGATCATC     |
| M00076 | V\$GATA2_01 | 0.80424 | 5918 | (-) | NNNGATRNNN      | ATGGATCATC     |
|        |             | 0.81490 |      |     |                 |                |
| M00075 | V\$GATA1_01 | 6       | 5921 | (-) | SNNGATNNNN      | GATCATCTCA     |
|        |             | 0.85566 |      |     |                 |                |
| M00076 | V\$GATA2_01 | 1       | 5921 | (-) | NNNGATRNNN      | GATCATCTCA     |
|        |             | 0.83030 |      |     |                 |                |
| M00077 | V\$GATA3_01 | 6       | 5921 | (-) | NNGATARNG       | GATCATCTC      |
| M00127 | V\$GATA1_03 | 0.78099 | 5930 | (-) | RNSNNGATAANNNGN | ACTGCTCTCTGTAC |

|        |             |         |      |     |                |                |
|--------|-------------|---------|------|-----|----------------|----------------|
|        |             | 0.81822 |      |     |                |                |
| M00076 | V\$GATA2_01 | 3       | 5944 | (-) | NNNGATRNNN     | TGCTATGGTG     |
|        |             | 0.78466 |      |     |                |                |
| M00127 | V\$GATA1_03 | 4       | 5948 | (+) | RNSNNGATAANNGN | ATGGTGATGGAAAC |
|        |             | 0.89684 |      |     |                |                |
| M00075 | V\$GATA1_01 | 1       | 5950 | (+) | SNNGATNNNN     | GGTGATGGAA     |
|        |             | 0.84393 |      |     |                |                |
| M00076 | V\$GATA2_01 | 3       | 5950 | (+) | NNNGATRNNN     | GGTGATGGAA     |
|        |             | 0.84714 |      |     |                |                |
| M00077 | V\$GATA3_01 | 2       | 5951 | (+) | NNGATARNG      | GTGATGGAA      |
|        |             | 0.79250 |      |     |                |                |
| M00127 | V\$GATA1_03 | 4       | 5979 | (+) | RNSNNGATAANNGN | ATGGAGAAAATTCA |
|        |             | 0.84622 |      |     |                |                |
| M00203 | V\$GATA_C   | 6       | 6039 | (-) | NGATAAGNMNN    | TTTATTTGTCA    |
|        |             | 0.78031 |      |     |                |                |
| M00126 | V\$GATA1_02 | 2       | 6048 | (-) | NNNNNGATANKGNN | CACATAATCTTTAA |
|        |             | 0.78035 |      |     |                |                |
| M00075 | V\$GATA1_01 | 5       | 6050 | (-) | SNNGATNNNN     | CATAATCTTT     |
|        |             |         |      |     |                |                |
| M00076 | V\$GATA2_01 | 0.79567 | 6050 | (-) | NNNGATRNNN     | CATAATCTTT     |
|        |             | 0.89986 |      |     |                |                |
| M00077 | V\$GATA3_01 | 7       | 6050 | (-) | NNGATARNG      | CATAATCTT      |
|        |             | 0.78726 |      |     |                |                |
| M00075 | V\$GATA1_01 | 6       | 6108 | (+) | SNNGATNNNN     | GAAGTTAGGT     |
|        |             | 0.79206 |      |     |                |                |
| M00076 | V\$GATA2_01 | 1       | 6108 | (+) | NNNGATRNNN     | GAAGTTAGGT     |
|        |             | 0.78574 |      |     |                |                |
| M00076 | V\$GATA2_01 | 7       | 6113 | (+) | NNNGATRNNN     | TAGGTTAGTT     |
|        |             |         |      |     |                |                |
| M00203 | V\$GATA_C   | 0.94315 | 6147 | (-) | NGATAAGNMNN    | ATGATTATCA     |
|        |             | 0.79906 |      |     |                |                |
| M00126 | V\$GATA1_02 | 3       | 6148 | (-) | NNNNNGATANKGNN | TGATTATCAAAAC  |
|        |             | 0.85569 |      |     |                |                |
| M00128 | V\$GATA1_04 | 9       | 6148 | (-) | NNCWGATARNNNN  | TGATTATCAAAA   |
|        |             | 0.81589 |      |     |                |                |
| M00075 | V\$GATA1_01 | 3       | 6166 | (-) | SNNGATNNNN     | AAAAATCTAC     |
|        |             | 0.82214 |      |     |                |                |
| M00127 | V\$GATA1_03 | 6       | 6199 | (+) | RNSNNGATAANNGN | ATGCAGATTAAAGA |
|        |             | 0.77936 |      |     |                |                |
| M00075 | V\$GATA1_01 | 8       | 6201 | (+) | SNNGATNNNN     | GCAGATTAAG     |
|        |             | 0.83916 |      |     |                |                |
| M00077 | V\$GATA3_01 | 7       | 6202 | (+) | NNGATARNG      | CAGATTAA       |
|        |             | 0.79476 |      |     |                |                |
| M00076 | V\$GATA2_01 | 8       | 6223 | (+) | NNNGATRNNN     | TCAGTTAGCC     |
|        |             | 0.80205 |      |     |                |                |
| M00127 | V\$GATA1_03 | 8       | 6223 | (-) | RNSNNGATAANNGN | TCAGTTAGCCTGGT |
|        |             | 0.80034 |      |     |                |                |
| M00127 | V\$GATA1_03 | 3       | 6229 | (+) | RNSNNGATAANNGN | AGCCTGGTAGGTAG |
|        |             | 0.82015 |      |     |                |                |
| M00128 | V\$GATA1_04 | 9       | 6257 | (-) | NNCWGATARNNNN  | TTCCTTACCAGTT  |
|        |             | 0.89468 |      |     |                |                |
| M00203 | V\$GATA_C   | 8       | 6315 | (-) | NGATAAGNMNN    | GGTAATTATCA    |
|        |             | 0.80062 |      |     |                |                |
| M00126 | V\$GATA1_02 | 5       | 6316 | (-) | NNNNNGATANKGNN | GTAATTATCATTTT |
|        |             | 0.88804 |      |     |                |                |
| M00127 | V\$GATA1_03 | 5       | 6316 | (-) | RNSNNGATAANNGN | GTAATTATCATTTT |
|        |             | 0.88786 |      |     |                |                |
| M00128 | V\$GATA1_04 | 8       | 6316 | (-) | NNCWGATARNNNN  | GTAATTATCATTT  |
|        |             | 0.81342 |      |     |                |                |
| M00075 | V\$GATA1_01 | 5       | 6318 | (-) | SNNGATNNNN     | AATTATCATT     |
|        |             | 0.83581 |      |     |                |                |
| M00076 | V\$GATA2_01 | 4       | 6318 | (-) | NNNGATRNNN     | AATTATCATT     |
|        |             | 0.84315 |      |     |                |                |
| M00077 | V\$GATA3_01 | 5       | 6318 | (-) | NNGATARNG      | AATTATCAT      |
|        |             | 0.83845 |      |     |                |                |
| M00203 | V\$GATA_C   | 9       | 6337 | (-) | NGATAAGNMNN    | AATGTTTGCA     |



|        |             |                    |      |     |                |                |
|--------|-------------|--------------------|------|-----|----------------|----------------|
| M00126 | V\$GATA1_02 | 0.79843<br>7       | 6365 | (-) | NNNNNGATANKGNN | TCTCTTTTCTTTTC |
| M00127 | V\$GATA1_03 | 0.78833<br>9       | 6365 | (-) | RNSNNGATAANNGN | TCTCTTTTCTTTTC |
| M00075 | V\$GATA1_01 | 0.83465<br>0.86130 | 6380 | (-) | SNNGATNNNN     | AAGGATCAAG     |
| M00075 | V\$GATA1_01 | 3<br>0.86197       | 6395 | (+) | SNNGATNNNN     | GAAGATGCTA     |
| M00076 | V\$GATA2_01 | 6<br>0.78270       | 6395 | (+) | NNNGATRNNN     | GAAGATGCTA     |
| M00127 | V\$GATA1_03 | 5                  | 6396 | (+) | RNSNNGATAANNGN | AAGATGCTAAGGTA |
| M00076 | V\$GATA2_01 | 0.82995<br>0.84099 | 6408 | (+) | NNNGATRNNN     | TAAGATCTTT     |
| M00128 | V\$GATA1_04 | 3<br>0.80059       | 6437 | (-) | NNCWGATARNNNN  | TTATATATCATAA  |
| M00075 | V\$GATA1_01 | 2<br>0.84303       | 6439 | (-) | SNNGATNNNN     | ATATATCATA     |
| M00076 | V\$GATA2_01 | 1<br>0.80343       | 6439 | (-) | NNNGATRNNN     | ATATATCATA     |
| M00126 | V\$GATA1_02 | 8<br>0.80867       | 6449 | (+) | NNNNNGATANKGNN | AACAAGATATGCTC |
| M00127 | V\$GATA1_03 | 2<br>0.84497       | 6449 | (+) | RNSNNGATAANNGN | AACAAGATATGCTC |
| M00128 | V\$GATA1_04 | 5<br>0.87759       | 6450 | (+) | NNCWGATARNNNN  | ACAAGATATGCTC  |
| M00075 | V\$GATA1_01 | 1                  | 6451 | (+) | SNNGATNNNN     | CAAGATATGC     |
| M00076 | V\$GATA2_01 | 0.90618            | 6451 | (+) | NNNGATRNNN     | CAAGATATGC     |
| M00077 | V\$GATA3_01 | 0.85556<br>0.83446 | 6452 | (+) | NNGATARNG      | AAGATATGC      |
| M00076 | V\$GATA2_01 | 1<br>0.86766       | 6453 | (-) | NNNGATRNNN     | AGATATGCTC     |
| M00203 | V\$GATA_C   | 1                  | 6453 | (+) | NGATAAGNMNN    | AGATATGCTCT    |
| M00127 | V\$GATA1_03 | 0.83023<br>0.81188 | 6474 | (-) | RNSNNGATAANNGN | AAAGCTATCCGCTG |
| M00128 | V\$GATA1_04 | 7<br>0.93879       | 6474 | (-) | NNCWGATARNNNN  | AAAGCTATCCGCT  |
| M00075 | V\$GATA1_01 | 6<br>0.98691       | 6476 | (-) | SNNGATNNNN     | AGCTATCCGC     |
| M00076 | V\$GATA2_01 | 9                  | 6476 | (-) | NNNGATRNNN     | AGCTATCCGC     |
| M00077 | V\$GATA3_01 | 0.82809<br>0.81095 | 6476 | (-) | NNGATARNG      | AGCTATCCG      |
| M00075 | V\$GATA1_01 | 8<br>0.80153       | 6494 | (+) | SNNGATNNNN     | TGCGATTGAA     |
| M00076 | V\$GATA2_01 | 4<br>0.86087       | 6494 | (+) | NNNGATRNNN     | TGCGATTGAA     |
| M00077 | V\$GATA3_01 | 7<br>0.77156       | 6495 | (+) | NNGATARNG      | GCGATTGAA      |
| M00126 | V\$GATA1_02 | 2                  | 6514 | (-) | NNNNNGATANKGNN | AGTGCTATCATACC |
| M00127 | V\$GATA1_03 | 0.78197<br>0.88694 | 6514 | (-) | RNSNNGATAANNGN | AGTGCTATCATACC |
| M00128 | V\$GATA1_04 | 9<br>0.85143       | 6514 | (-) | NNCWGATARNNNN  | AGTGCTATCATAC  |
| M00075 | V\$GATA1_01 | 1<br>0.90888       | 6516 | (-) | SNNGATNNNN     | TGCTATCATA     |
| M00076 | V\$GATA2_01 | 6<br>0.88746       | 6516 | (-) | NNNGATRNNN     | TGCTATCATA     |
| M00077 | V\$GATA3_01 | 1<br>0.80198       | 6516 | (-) | NNGATARNG      | TGCTATCAT      |
| M00076 | V\$GATA2_01 | 5<br>0.84218       | 6519 | (+) | NNNGATRNNN     | TATCATACCC     |
| M00126 | V\$GATA1_02 | 8                  | 6546 | (+) | NNNNNGATANKGNN | TGCCAGATAAAGTA |

|        |             |         |      |     |                |                |  |
|--------|-------------|---------|------|-----|----------------|----------------|--|
|        |             | 0.78343 |      |     |                |                |  |
| M00127 | V\$GATA1_03 | 9       | 6546 | (+) | RNSNNGATAANNGN | TGCCAGATAAAGTA |  |
|        |             | 0.90226 |      |     |                |                |  |
| M00128 | V\$GATA1_04 | 7       | 6547 | (+) | NNCWGATARNNNN  | GCCAGATAAAGTA  |  |
|        |             | 0.85439 |      |     |                |                |  |
| M00075 | V\$GATA1_01 | 3       | 6548 | (+) | SNNGATNNNN     | CCAGATAAAG     |  |
|        |             | 0.86964 |      |     |                |                |  |
| M00076 | V\$GATA2_01 | 4       | 6548 | (+) | NNNGATRNNN     | CCAGATAAAG     |  |
|        |             | 0.90784 |      |     |                |                |  |
| M00077 | V\$GATA3_01 | 2       | 6549 | (+) | NNGATARNG      | CAGATAAAG      |  |
|        |             |         |      |     |                |                |  |
| M00203 | V\$GATA_C   | 0.90991 | 6550 | (+) | NGATAAGNMNN    | AGATAAAGTAA    |  |
|        |             | 0.81464 |      |     |                |                |  |
| M00128 | V\$GATA1_04 | 5       | 6581 | (+) | NNCWGATARNNNN  | ACATGATCAGGAG  |  |
|        |             | 0.85488 |      |     |                |                |  |
| M00075 | V\$GATA1_01 | 6       | 6582 | (+) | SNNGATNNNN     | CATGATCAGG     |  |
|        |             | 0.86327 |      |     |                |                |  |
| M00075 | V\$GATA1_01 | 7       | 6582 | (-) | SNNGATNNNN     | CATGATCAGG     |  |
|        |             | 0.83220 |      |     |                |                |  |
| M00076 | V\$GATA2_01 | 6       | 6582 | (+) | NNNGATRNNN     | CATGATCAGG     |  |
|        |             |         |      |     |                |                |  |
| M00076 | V\$GATA2_01 | 0.83401 | 6582 | (-) | NNNGATRNNN     | CATGATCAGG     |  |
|        |             | 0.80552 |      |     |                |                |  |
| M00075 | V\$GATA1_01 | 8       | 6611 | (-) | SNNGATNNNN     | TAAAATCAAG     |  |
|        |             | 0.82527 |      |     |                |                |  |
| M00075 | V\$GATA1_01 | 1       | 6656 | (-) | SNNGATNNNN     | GAACATCTGA     |  |
|        |             | 0.87054 |      |     |                |                |  |
| M00076 | V\$GATA2_01 | 6       | 6656 | (-) | NNNGATRNNN     | GAACATCTGA     |  |
|        |             | 0.78282 |      |     |                |                |  |
| M00075 | V\$GATA1_01 | 3       | 6682 | (+) | SNNGATNNNN     | CCTGTTTCTG     |  |
|        |             | 0.78973 |      |     |                |                |  |
| M00075 | V\$GATA1_01 | 3       | 6690 | (-) | SNNGATNNNN     | TGTCATCCCA     |  |
|        |             | 0.86287 |      |     |                |                |  |
| M00076 | V\$GATA2_01 | 8       | 6690 | (-) | NNNGATRNNN     | TGTCATCCCA     |  |
|        |             | 0.83281 |      |     |                |                |  |
| M00126 | V\$GATA1_02 | 2       | 6696 | (+) | NNNNNGATANKGNN | CCCAGGATAAGAGT |  |
|        |             |         |      |     |                |                |  |
| M00127 | V\$GATA1_03 | 0.89172 | 6696 | (+) | RNSNNGATAANNGN | CCCAGGATAAGAGT |  |
|        |             | 0.83415 |      |     |                |                |  |
| M00075 | V\$GATA1_01 | 6       | 6698 | (+) | SNNGATNNNN     | CAGGATAAGA     |  |
|        |             | 0.87956 |      |     |                |                |  |
| M00076 | V\$GATA2_01 | 7       | 6698 | (+) | NNNGATRNNN     | CAGGATAAGA     |  |
|        |             | 0.87416 |      |     |                |                |  |
| M00077 | V\$GATA3_01 | 9       | 6699 | (+) | NNGATARNG      | AGGATAAGA      |  |
|        |             | 0.93041 |      |     |                |                |  |
| M00203 | V\$GATA_C   | 3       | 6700 | (+) | NGATAAGNMNN    | GGATAAGAGTT    |  |
|        |             | 0.83783 |      |     |                |                |  |
| M00077 | V\$GATA3_01 | 8       | 6711 | (-) | NNGATARNG      | CACTCTCTT      |  |
|        |             | 0.78935 |      |     |                |                |  |
| M00076 | V\$GATA2_01 | 5       | 6770 | (+) | NNNGATRNNN     | TAGGATCAAT     |  |
|        |             | 0.86197 |      |     |                |                |  |
| M00076 | V\$GATA2_01 | 6       | 6781 | (-) | NNNGATRNNN     | GGCTATGCTG     |  |
|        |             | 0.79927 |      |     |                |                |  |
| M00076 | V\$GATA2_01 | 8       | 6805 | (-) | NNNGATRNNN     | AGTCATGCCC     |  |
|        |             | 0.78755 |      |     |                |                |  |
| M00076 | V\$GATA2_01 | 1       | 6837 | (+) | NNNGATRNNN     | GAGCATGCCA     |  |
|        |             | 0.78845 |      |     |                |                |  |
| M00076 | V\$GATA2_01 | 3       | 6837 | (-) | NNNGATRNNN     | GAGCATGCCA     |  |
|        |             | 0.85932 |      |     |                |                |  |
| M00075 | V\$GATA1_01 | 9       | 6862 | (-) | SNNGATNNNN     | TACCATCTCA     |  |
|        |             |         |      |     |                |                |  |
| M00076 | V\$GATA2_01 | 0.88092 | 6862 | (-) | NNNGATRNNN     | TACCATCTCA     |  |
|        |             | 0.89056 |      |     |                |                |  |
| M00077 | V\$GATA3_01 | 3       | 6862 | (-) | NNGATARNG      | TACCATCTC      |  |
|        |             | 0.84600 |      |     |                |                |  |
| M00075 | V\$GATA1_01 | 2       | 6904 | (+) | SNNGATNNNN     | AGTGATGCTA     |  |

|        |             |         |      |     |                |                |
|--------|-------------|---------|------|-----|----------------|----------------|
|        |             | 0.81190 |      |     |                |                |
| M00076 | V\$GATA2_01 | 8       | 6904 | (+) | NNNGATRNNN     | AGTGATGCTA     |
| M00127 | V\$GATA1_03 | 0.78197 | 6907 | (-) | RNSNNGATAANNGN | GATGCTATCCAACC |
|        |             | 0.79022 |      |     |                |                |
| M00075 | V\$GATA1_01 | 7       | 6909 | (-) | SNNGATNNNN     | TGCTATCCAA     |
|        |             | 0.85295 |      |     |                |                |
| M00076 | V\$GATA2_01 | 4       | 6909 | (-) | NNNGATRNNN     | TGCTATCCAA     |
|        |             | 0.84138 |      |     |                |                |
| M00077 | V\$GATA3_01 | 2       | 6909 | (-) | NNGATARNG      | TGCTATCCA      |
|        |             | 0.89486 |      |     |                |                |
| M00075 | V\$GATA1_01 | 7       | 6917 | (-) | SNNGATNNNN     | AACCATCTCA     |
| M00076 | V\$GATA2_01 | 0.91069 | 6917 | (-) | NNNGATRNNN     | AACCATCTCA     |
|        |             | 0.85866 |      |     |                |                |
| M00077 | V\$GATA3_01 | 2       | 6917 | (-) | NNGATARNG      | AACCATCTC      |
|        |             | 0.77591 |      |     |                |                |
| M00075 | V\$GATA1_01 | 3       | 6919 | (-) | SNNGATNNNN     | CCATCTCACC     |
|        |             | 0.79960 |      |     |                |                |
| M00075 | V\$GATA1_01 | 5       | 6932 | (-) | SNNGATNNNN     | TGACATCCCT     |
|        |             | 0.84528 |      |     |                |                |
| M00076 | V\$GATA2_01 | 6       | 6932 | (-) | NNNGATRNNN     | TGACATCCCT     |
|        |             | 0.80207 |      |     |                |                |
| M00075 | V\$GATA1_01 | 3       | 6938 | (-) | SNNGATNNNN     | CCCTGTCTCC     |
|        |             | 0.81326 |      |     |                |                |
| M00076 | V\$GATA2_01 | 1       | 6938 | (-) | NNNGATRNNN     | CCCTGTCTCC     |
|        |             | 0.80602 |      |     |                |                |
| M00075 | V\$GATA1_01 | 2       | 6952 | (-) | SNNGATNNNN     | CTCAATCTTT     |
|        |             | 0.80694 |      |     |                |                |
| M00076 | V\$GATA2_01 | 6       | 6952 | (-) | NNNGATRNNN     | CTCAATCTTT     |
|        |             | 0.90828 |      |     |                |                |
| M00077 | V\$GATA3_01 | 5       | 6952 | (-) | NNGATARNG      | CTCAATCTT      |
|        |             | 0.77591 |      |     |                |                |
| M00075 | V\$GATA1_01 | 3       | 6961 | (-) | SNNGATNNNN     | TCCCAGCACC     |
|        |             | 0.85119 |      |     |                |                |
| M00203 | V\$GATA_C   | 6       | 6972 | (-) | NGATAAGNMNN    | AGGTCTTTTCT    |
| M00075 | V\$GATA1_01 | 0.86772 | 6997 | (-) | SNNGATNNNN     | TTGCATCAGG     |
|        |             | 0.81326 |      |     |                |                |
| M00076 | V\$GATA2_01 | 1       | 6997 | (-) | NNNGATRNNN     | TTGCATCAGG     |
|        |             | 0.83810 |      |     |                |                |
| M00075 | V\$GATA1_01 | 5       | 7033 | (-) | SNNGATNNNN     | TAGCATCAGT     |
|        |             | 0.81190 |      |     |                |                |
| M00076 | V\$GATA2_01 | 8       | 7033 | (-) | NNNGATRNNN     | TAGCATCAGT     |
|        |             | 0.84452 |      |     |                |                |
| M00075 | V\$GATA1_01 | 1       | 7059 | (+) | SNNGATNNNN     | CAGGATTGAC     |
|        |             | 0.84618 |      |     |                |                |
| M00076 | V\$GATA2_01 | 9       | 7059 | (+) | NNNGATRNNN     | CAGGATTGAC     |
|        |             | 0.85784 |      |     |                |                |
| M00075 | V\$GATA1_01 | 8       | 7076 | (+) | SNNGATNNNN     | AGTGATTCCT     |
|        |             | 0.82453 |      |     |                |                |
| M00076 | V\$GATA2_01 | 8       | 7076 | (+) | NNNGATRNNN     | AGTGATTCCT     |
|        |             | 0.78574 |      |     |                |                |
| M00076 | V\$GATA2_01 | 7       | 7100 | (+) | NNNGATRNNN     | TAGCATGTTG     |
|        |             | 0.79763 |      |     |                |                |
| M00075 | V\$GATA1_01 | 1       | 7103 | (+) | SNNGATNNNN     | CATGTTGGGC     |
| M00203 | V\$GATA_C   | 0.89593 | 7142 | (-) | NGATAAGNMNN    | GTGCATATCT     |
|        |             | 0.80243 |      |     |                |                |
| M00076 | V\$GATA2_01 | 6       | 7143 | (+) | NNNGATRNNN     | TGTCATATCT     |
|        |             | 0.85906 |      |     |                |                |
| M00126 | V\$GATA1_02 | 2       | 7143 | (-) | NNNNNGATANKGNN | TGTCATATCTTTTA |
|        |             | 0.87346 |      |     |                |                |
| M00128 | V\$GATA1_04 | 8       | 7143 | (-) | NNCWGATARNNNN  | TGTCATATCTTTT  |
|        |             | 0.78775 |      |     |                |                |
| M00075 | V\$GATA1_01 | 9       | 7145 | (-) | SNNGATNNNN     | TCATATCTTT     |

|        |             |         |      |     |                |                |
|--------|-------------|---------|------|-----|----------------|----------------|
|        |             | 0.83852 |      |     |                |                |
| M00076 | V\$GATA2_01 | 1       | 7145 | (-) | NNNGATRNNN     | TCATATCTTT     |
|        |             | 0.88746 |      |     |                |                |
| M00077 | V\$GATA3_01 | 1       | 7145 | (-) | NNGATARNG      | TCATATCTT      |
|        |             | 0.85295 |      |     |                |                |
| M00076 | V\$GATA2_01 | 4       | 7228 | (-) | NNNGATRNNN     | GGCTATGCTA     |
|        |             | 0.82971 |      |     |                |                |
| M00075 | V\$GATA1_01 | 4       | 7238 | (-) | SNNGATNNNN     | CCTAATCTCA     |
|        |             |         |      |     |                |                |
| M00076 | V\$GATA2_01 | 0.84258 | 7238 | (-) | NNNGATRNNN     | CCTAATCTCA     |
|        |             | 0.93797 |      |     |                |                |
| M00077 | V\$GATA3_01 | 1       | 7238 | (-) | NNGATARNG      | CCTAATCTC      |
|        |             | 0.82132 |      |     |                |                |
| M00075 | V\$GATA1_01 | 3       | 7299 | (+) | SNNGATNNNN     | AGAGATGACT     |
|        |             | 0.84573 |      |     |                |                |
| M00076 | V\$GATA2_01 | 7       | 7299 | (+) | NNNGATRNNN     | AGAGATGACT     |
|        |             | 0.80328 |      |     |                |                |
| M00127 | V\$GATA1_03 | 3       | 7303 | (-) | RNSNNGATAANNGN | ATGACTATTTTGCT |
|        |             | 0.83286 |      |     |                |                |
| M00203 | V\$GATA_C   | 7       | 7326 | (-) | NGATAAGNMNN    | AATCAATATCT    |
|        |             |         |      |     |                |                |
| M00126 | V\$GATA1_02 | 0.7825  | 7327 | (-) | NNNNNGATANKGNN | ATCAATATCTTAGT |
|        |             | 0.83070 |      |     |                |                |
| M00075 | V\$GATA1_01 | 1       | 7329 | (-) | SNNGATNNNN     | CAATATCTTA     |
|        |             | 0.90753 |      |     |                |                |
| M00076 | V\$GATA2_01 | 3       | 7329 | (-) | NNNGATRNNN     | CAATATCTTA     |
|        |             | 0.90163 |      |     |                |                |
| M00077 | V\$GATA3_01 | 9       | 7329 | (-) | NNGATARNG      | CAATATCTT      |
|        |             | 0.83711 |      |     |                |                |
| M00075 | V\$GATA1_01 | 7       | 7355 | (-) | SNNGATNNNN     | AGAAATCAGA     |
|        |             | 0.84573 |      |     |                |                |
| M00076 | V\$GATA2_01 | 7       | 7355 | (-) | NNNGATRNNN     | AGAAATCAGA     |
|        |             | 0.77048 |      |     |                |                |
| M00075 | V\$GATA1_01 | 4       | 7360 | (+) | SNNGATNNNN     | TCAGATCCAT     |
|        |             | 0.80920 |      |     |                |                |
| M00076 | V\$GATA2_01 | 2       | 7360 | (+) | NNNGATRNNN     | TCAGATCCAT     |
|        |             | 0.88568 |      |     |                |                |
| M00077 | V\$GATA3_01 | 9       | 7417 | (+) | NNGATARNG      | AAGATTAGA      |
|        |             | 0.84467 |      |     |                |                |
| M00203 | V\$GATA_C   | 2       | 7418 | (+) | NGATAAGNMNN    | AGATTAGAACT    |
|        |             | 0.81885 |      |     |                |                |
| M00075 | V\$GATA1_01 | 5       | 7464 | (+) | SNNGATNNNN     | ATTGATTGTT     |
|        |             | 0.81093 |      |     |                |                |
| M00126 | V\$GATA1_02 | 8       | 7548 | (+) | NNNNNGATANKGNN | TTTCAGATAGCCCA |
|        |             | 0.89368 |      |     |                |                |
| M00128 | V\$GATA1_04 | 9       | 7549 | (+) | NNCWGATARNNNN  | TTCAGATAGCCCA  |
|        |             | 0.87216 |      |     |                |                |
| M00075 | V\$GATA1_01 | 2       | 7550 | (+) | SNNGATNNNN     | TCAGATAGCC     |
|        |             | 0.95444 |      |     |                |                |
| M00076 | V\$GATA2_01 | 3       | 7550 | (+) | NNNGATRNNN     | TCAGATAGCC     |
|        |             | 0.87328 |      |     |                |                |
| M00077 | V\$GATA3_01 | 3       | 7551 | (+) | NNGATARNG      | CAGATAGCC      |
|        |             | 0.81243 |      |     |                |                |
| M00075 | V\$GATA1_01 | 8       | 7568 | (+) | SNNGATNNNN     | TAGGATTCTT     |
|        |             | 0.85566 |      |     |                |                |
| M00076 | V\$GATA2_01 | 1       | 7568 | (+) | NNNGATRNNN     | TAGGATTCTT     |
|        |             | 0.89624 |      |     |                |                |
| M00203 | V\$GATA_C   | 1       | 7590 | (-) | NGATAAGNMNN    | CATTTTTATCA    |
|        |             |         |      |     |                |                |
| M00126 | V\$GATA1_02 | 0.82125 | 7591 | (-) | NNNNNGATANKGNN | ATTTTTATCACGAA |
|        |             | 0.78882 |      |     |                |                |
| M00127 | V\$GATA1_03 | 9       | 7591 | (-) | RNSNNGATAANNGN | ATTTTTATCACGAA |
|        |             | 0.89828 |      |     |                |                |
| M00128 | V\$GATA1_04 | 4       | 7591 | (-) | NNCWGATARNNNN  | ATTTTTATCACGA  |
|        |             |         |      |     |                |                |
| M00075 | V\$GATA1_01 | 0.83613 | 7593 | (-) | SNNGATNNNN     | TTTTATCACG     |

|        |             |         |      |     |                |                |
|--------|-------------|---------|------|-----|----------------|----------------|
|        |             | 0.81551 |      |     |                |                |
| M00076 | V\$GATA2_01 | 6       | 7593 | (-) | NNNGATRNNN     | TTTATCACG      |
|        |             | 0.87239 |      |     |                |                |
| M00077 | V\$GATA3_01 | 7       | 7593 | (-) | NNGATARNG      | TTTTATCAC      |
|        |             | 0.83437 |      |     |                |                |
| M00126 | V\$GATA1_02 | 5       | 7633 | (-) | NNNNNGATANKGNN | GAAAGTATCTGTAT |
|        |             | 0.84051 |      |     |                |                |
| M00127 | V\$GATA1_03 | 9       | 7633 | (-) | RNSNNGATAANNGN | GAAAGTATCTGTAT |
|        |             | 0.85291 |      |     |                |                |
| M00075 | V\$GATA1_01 | 2       | 7635 | (-) | SNNGATNNNN     | AAGTATCTGT     |
|        |             | 0.88137 |      |     |                |                |
| M00076 | V\$GATA2_01 | 1       | 7635 | (-) | NNNGATRNNN     | AAGTATCTGT     |
|        |             | 0.82631 |      |     |                |                |
| M00127 | V\$GATA1_03 | 1       | 7682 | (-) | RNSNNGATAANNGN | GTTATTATACTCCC |
|        |             |         |      |     |                |                |
| M00076 | V\$GATA2_01 | 0.79567 | 7701 | (+) | NNNGATRNNN     | CAACATATTT     |
|        |             | 0.78726 |      |     |                |                |
| M00075 | V\$GATA1_01 | 6       | 7722 | (-) | SNNGATNNNN     | GACAATCCAA     |
|        |             |         |      |     |                |                |
| M00076 | V\$GATA2_01 | 0.79567 | 7722 | (-) | NNNGATRNNN     | GACAATCCAA     |
|        |             | 0.78035 |      |     |                |                |
| M00075 | V\$GATA1_01 | 5       | 7754 | (-) | SNNGATNNNN     | CTGAATCTTT     |
|        |             | 0.78168 |      |     |                |                |
| M00076 | V\$GATA2_01 | 7       | 7754 | (-) | NNNGATRNNN     | CTGAATCTTT     |
|        |             | 0.82897 |      |     |                |                |
| M00077 | V\$GATA3_01 | 7       | 7754 | (-) | NNGATARNG      | CTGAATCTT      |
|        |             | 0.86278 |      |     |                |                |
| M00075 | V\$GATA1_01 | 4       | 7796 | (-) | SNNGATNNNN     | AGCAATCCAG     |
|        |             | 0.82724 |      |     |                |                |
| M00076 | V\$GATA2_01 | 4       | 7796 | (-) | NNNGATRNNN     | AGCAATCCAG     |
|        |             | 0.81441 |      |     |                |                |
| M00075 | V\$GATA1_01 | 3       | 7860 | (+) | SNNGATNNNN     | AATGATTCTC     |
|        |             | 0.79386 |      |     |                |                |
| M00076 | V\$GATA2_01 | 6       | 7860 | (+) | NNNGATRNNN     | AATGATTCTC     |
|        |             | 0.81063 |      |     |                |                |
| M00127 | V\$GATA1_03 | 2       | 7861 | (-) | RNSNNGATAANNGN | ATGATTCTCTTTCT |
|        |             | 0.83942 |      |     |                |                |
| M00076 | V\$GATA2_01 | 3       | 7911 | (-) | NNNGATRNNN     | AGGTATGCCA     |
|        |             | 0.86475 |      |     |                |                |
| M00075 | V\$GATA1_01 | 8       | 7935 | (-) | SNNGATNNNN     | AAGTATCCCA     |
|        |             | 0.92828 |      |     |                |                |
| M00076 | V\$GATA2_01 | 1       | 7935 | (-) | NNNGATRNNN     | AAGTATCCCA     |
|        |             | 0.83597 |      |     |                |                |
| M00203 | V\$GATA_C   | 4       | 8017 | (-) | NGATAAGNMNN    | ACTATGTATCT    |
|        |             | 0.78394 |      |     |                |                |
| M00076 | V\$GATA2_01 | 2       | 8020 | (-) | NNNGATRNNN     | ATGTATCTAA     |
|        |             |         |      |     |                |                |
| M00077 | V\$GATA3_01 | 0.86132 | 8025 | (-) | NNGATARNG      | TCTAATCTA      |
|        |             |         |      |     |                |                |
| M00075 | V\$GATA1_01 | 0.82231 | 8029 | (-) | SNNGATNNNN     | ATCTATCCTA     |
|        |             | 0.90527 |      |     |                |                |
| M00076 | V\$GATA2_01 | 7       | 8029 | (-) | NNNGATRNNN     | ATCTATCCTA     |
|        |             | 0.82986 |      |     |                |                |
| M00077 | V\$GATA3_01 | 3       | 8029 | (-) | NNGATARNG      | ATCTATCCT      |
|        |             | 0.78343 |      |     |                |                |
| M00126 | V\$GATA1_02 | 8       | 8051 | (-) | NNNNNGATANKGNN | AAGGCTATCAACCC |
|        |             | 0.87236 |      |     |                |                |
| M00127 | V\$GATA1_03 | 6       | 8051 | (-) | RNSNNGATAANNGN | AAGGCTATCAACCC |
|        |             | 0.89239 |      |     |                |                |
| M00075 | V\$GATA1_01 | 9       | 8053 | (-) | SNNGATNNNN     | GGCTATCAAC     |
|        |             | 0.86783 |      |     |                |                |
| M00076 | V\$GATA2_01 | 9       | 8053 | (-) | NNNGATRNNN     | GGCTATCAAC     |
|        |             | 0.83119 |      |     |                |                |
| M00077 | V\$GATA3_01 | 2       | 8053 | (-) | NNGATARNG      | GGCTATCAA      |
|        |             | 0.85212 |      |     |                |                |
| M00203 | V\$GATA_C   | 8       | 8083 | (-) | NGATAAGNMNN    | ATTATTGTCA     |

|        |             |         |      |     |                |                |
|--------|-------------|---------|------|-----|----------------|----------------|
|        |             | 0.78726 |      |     |                |                |
| M00075 | V\$GATA1_01 | 6       | 8104 | (+) | SNNGATNNNN     | AAAGATTCT      |
|        |             | 0.81641 |      |     |                |                |
| M00076 | V\$GATA2_01 | 9       | 8104 | (+) | NNNGATRNNN     | AAAGATTCT      |
|        |             | 0.80181 |      |     |                |                |
| M00127 | V\$GATA1_03 | 3       | 8118 | (+) | RNSNNGATAANNGN | GGGCAAATAATCCT |
|        |             | 0.77295 |      |     |                |                |
| M00075 | V\$GATA1_01 | 2       | 8123 | (-) | SNNGATNNNN     | AATAATCCTA     |
|        |             | 0.82949 |      |     |                |                |
| M00076 | V\$GATA2_01 | 9       | 8123 | (-) | NNNGATRNNN     | AATAATCCTA     |
|        |             | 0.88412 |      |     |                |                |
| M00203 | V\$GATA_C   | 6       | 8125 | (-) | NGATAAGNMNN    | TAATCCTATCT    |
|        |             | 0.89531 |      |     |                |                |
| M00126 | V\$GATA1_02 | 2       | 8126 | (-) | NNNNNGATANKGN  | AATCCTATCTGGAT |
|        |             | 0.88167 |      |     |                |                |
| M00127 | V\$GATA1_03 | 6       | 8126 | (-) | RNSNNGATAANNGN | AATCCTATCTGGAT |
|        |             | 0.90655 |      |     |                |                |
| M00128 | V\$GATA1_04 | 6       | 8126 | (-) | NNCWGATARNNNN  | AATCCTATCTGGA  |
|        |             | 0.92448 |      |     |                |                |
| M00075 | V\$GATA1_01 | 2       | 8128 | (-) | SNNGATNNNN     | TCCTATCTGG     |
|        |             | 0.92467 |      |     |                |                |
| M00076 | V\$GATA2_01 | 3       | 8128 | (-) | NNNGATRNNN     | TCCTATCTGG     |
|        |             | 0.94195 |      |     |                |                |
| M00077 | V\$GATA3_01 | 8       | 8128 | (-) | NNGATARNG      | TCCTATCTG      |
|        |             | 0.81185 |      |     |                |                |
| M00127 | V\$GATA1_03 | 7       | 8132 | (+) | RNSNNGATAANNGN | ATCTGGATATCTGT |
|        |             | 0.83958 |      |     |                |                |
| M00075 | V\$GATA1_01 | 5       | 8134 | (+) | SNNGATNNNN     | CTGGATATCT     |
|        |             |         |      |     |                |                |
| M00076 | V\$GATA2_01 | 0.85521 | 8134 | (+) | NNNGATRNNN     | CTGGATATCT     |
|        |             | 0.78466 |      |     |                |                |
| M00127 | V\$GATA1_03 | 4       | 8134 | (-) | RNSNNGATAANNGN | CTGGATATCTGTGG |
|        |             | 0.81688 |      |     |                |                |
| M00075 | V\$GATA1_01 | 1       | 8136 | (-) | SNNGATNNNN     | GGATATCTGT     |
|        |             | 0.88543 |      |     |                |                |
| M00076 | V\$GATA2_01 | 1       | 8136 | (-) | NNNGATRNNN     | GGATATCTGT     |
|        |             | 0.82769 |      |     |                |                |
| M00076 | V\$GATA2_01 | 5       | 8145 | (-) | NNNGATRNNN     | TGGTATCCAA     |
|        |             | 0.87709 |      |     |                |                |
| M00075 | V\$GATA1_01 | 8       | 8156 | (+) | SNNGATNNNN     | CATGATTTTT     |
|        |             | 0.82769 |      |     |                |                |
| M00076 | V\$GATA2_01 | 5       | 8156 | (+) | NNNGATRNNN     | CATGATTTTT     |
|        |             | 0.87709 |      |     |                |                |
| M00075 | V\$GATA1_01 | 8       | 8184 | (+) | SNNGATNNNN     | CCAGATTTTT     |
|        |             | 0.84709 |      |     |                |                |
| M00076 | V\$GATA2_01 | 1       | 8184 | (+) | NNNGATRNNN     | CCAGATTTTT     |
|        |             | 0.78134 |      |     |                |                |
| M00075 | V\$GATA1_01 | 3       | 8200 | (-) | SNNGATNNNN     | TTAAATCTTG     |
|        |             | 0.83535 |      |     |                |                |
| M00203 | V\$GATA_C   | 3       | 8202 | (-) | NGATAAGNMNN    | AAATCTTGCA     |
|        |             | 0.78417 |      |     |                |                |
| M00127 | V\$GATA1_03 | 4       | 8228 | (-) | RNSNNGATAANNGN | ATGGCTATGCTTCT |
|        |             | 0.82047 |      |     |                |                |
| M00076 | V\$GATA2_01 | 8       | 8230 | (-) | NNNGATRNNN     | GGCTATGCTT     |
|        |             | 0.85355 |      |     |                |                |
| M00128 | V\$GATA1_04 | 4       | 8258 | (+) | NNCWGATARNNNN  | ACATGATATATCC  |
|        |             | 0.86130 |      |     |                |                |
| M00075 | V\$GATA1_01 | 3       | 8259 | (+) | SNNGATNNNN     | CATGATATAT     |
|        |             | 0.85205 |      |     |                |                |
| M00076 | V\$GATA2_01 | 2       | 8259 | (+) | NNNGATRNNN     | CATGATATAT     |
|        |             | 0.86797 |      |     |                |                |
| M00203 | V\$GATA_C   | 1       | 8260 | (-) | NGATAAGNMNN    | ATGATATATCC    |
|        |             | 0.88474 |      |     |                |                |
| M00203 | V\$GATA_C   | 7       | 8261 | (+) | NGATAAGNMNN    | TGATATATCCT    |
|        |             | 0.83626 |      |     |                |                |
| M00076 | V\$GATA2_01 | 5       | 8263 | (-) | NNNGATRNNN     | ATATATCCTT     |

|        |             |         |      |     |                |                |
|--------|-------------|---------|------|-----|----------------|----------------|
|        |             | 0.79072 |      |     |                |                |
| M00075 | V\$GATA1_01 | 1       | 8280 | (-) | SNNGATNNNN     | CTCAATCAAT     |
|        |             | 0.86043 |      |     |                |                |
| M00077 | V\$GATA3_01 | 4       | 8280 | (-) | NNGATARNG      | CTCAATCAA      |
|        |             | 0.81235 |      |     |                |                |
| M00076 | V\$GATA2_01 | 9       | 8308 | (-) | NNNGATRNNN     | TGGAATCCTT     |
|        |             | 0.78515 |      |     |                |                |
| M00127 | V\$GATA1_03 | 4       | 8334 | (+) | RNSNNGATAANNGN | GAGGAGAAAAAGAG |
|        |             | 0.77593 |      |     |                |                |
| M00126 | V\$GATA1_02 | 8       | 8340 | (+) | NNNNNGATANKGNN | AAAAAGAGAAGGCA |
|        |             | 0.83030 |      |     |                |                |
| M00077 | V\$GATA3_01 | 6       | 8343 | (+) | NNGATARNG      | AAGAGAAGG      |
|        |             | 0.84405 |      |     |                |                |
| M00203 | V\$GATA_C   | 1       | 8344 | (+) | NGATAAGNMNN    | AGAGAAGGCAT    |
|        |             | 0.80108 |      |     |                |                |
| M00076 | V\$GATA2_01 | 3       | 8364 | (-) | NNNGATRNNN     | TGAAATCCTT     |
|        |             | 0.79318 |      |     |                |                |
| M00075 | V\$GATA1_01 | 9       | 8391 | (-) | SNNGATNNNN     | CTTCATCCAG     |
|        |             | 0.81342 |      |     |                |                |
| M00075 | V\$GATA1_01 | 5       | 8450 | (-) | SNNGATNNNN     | CACAATCCAA     |
|        |             | 0.81235 |      |     |                |                |
| M00076 | V\$GATA2_01 | 9       | 8450 | (-) | NNNGATRNNN     | CACAATCCAA     |
|        |             | 0.85866 |      |     |                |                |
| M00077 | V\$GATA3_01 | 2       | 8450 | (-) | NNGATARNG      | CACAATCCA      |
|        |             | 0.78784 |      |     |                |                |
| M00127 | V\$GATA1_03 | 9       | 8477 | (+) | RNSNNGATAANNGN | CTGGTGAAAGCAGT |
|        |             | 0.77406 |      |     |                |                |
| M00126 | V\$GATA1_02 | 2       | 8486 | (+) | NNNNNGATANKGNN | GCAGTGAGAAGAGA |
|        |             | 0.78931 |      |     |                |                |
| M00127 | V\$GATA1_03 | 9       | 8491 | (+) | RNSNNGATAANNGN | GAGAAGAGAAAAGA |
|        |             | 0.79843 |      |     |                |                |
| M00126 | V\$GATA1_02 | 8       | 8493 | (+) | NNNNNGATANKGNN | GAAGAGAAAAGAGA |
|        |             | 0.78833 |      |     |                |                |
| M00127 | V\$GATA1_03 | 9       | 8493 | (+) | RNSNNGATAANNGN | GAAGAGAAAAGAGA |
|        |             | 0.82724 |      |     |                |                |
| M00075 | V\$GATA1_01 | 6       | 8515 | (+) | SNNGATNNNN     | TTTGATTGTT     |
|        |             | 0.80739 |      |     |                |                |
| M00076 | V\$GATA2_01 | 7       | 8522 | (-) | NNNGATRNNN     | GTTCATCTTA     |
|        |             |         |      |     |                |                |
| M00203 | V\$GATA_C   | 0.87667 | 8524 | (-) | NGATAAGNMNN    | TCATCTTATCT    |
|        |             | 0.85062 |      |     |                |                |
| M00126 | V\$GATA1_02 | 5       | 8525 | (-) | NNNNNGATANKGNN | CATCTTATCTAAAT |
|        |             | 0.82214 |      |     |                |                |
| M00127 | V\$GATA1_03 | 6       | 8525 | (-) | RNSNNGATAANNGN | CATCTTATCTAAAT |
|        |             |         |      |     |                |                |
| M00128 | V\$GATA1_04 | 0.875   | 8525 | (-) | NNCWGATARNNNN  | CATCTTATCTAAA  |
|        |             | 0.89499 |      |     |                |                |
| M00077 | V\$GATA3_01 | 3       | 8527 | (-) | NNGATARNG      | TCTTATCTA      |
|        |             | 0.79318 |      |     |                |                |
| M00075 | V\$GATA1_01 | 9       | 8558 | (-) | SNNGATNNNN     | TAAAATCAGT     |
|        |             | 0.86812 |      |     |                |                |
| M00126 | V\$GATA1_02 | 5       | 8571 | (+) | NNNNNGATANKGNN | CCACAGATAAGCTA |
|        |             | 0.84688 |      |     |                |                |
| M00127 | V\$GATA1_03 | 9       | 8571 | (+) | RNSNNGATAANNGN | CCACAGATAAGCTA |
|        |             | 0.83394 |      |     |                |                |
| M00128 | V\$GATA1_04 | 6       | 8572 | (+) | NNCWGATARNNNN  | CACAGATAAGCTA  |
|        |             | 0.81095 |      |     |                |                |
| M00075 | V\$GATA1_01 | 8       | 8573 | (+) | SNNGATNNNN     | ACAGATAAGC     |
|        |             | 0.85791 |      |     |                |                |
| M00076 | V\$GATA2_01 | 6       | 8573 | (+) | NNNGATRNNN     | ACAGATAAGC     |
|        |             | 0.88170 |      |     |                |                |
| M00077 | V\$GATA3_01 | 1       | 8574 | (+) | NNGATARNG      | CAGATAAGC      |
|        |             | 0.92606 |      |     |                |                |
| M00203 | V\$GATA_C   | 4       | 8575 | (+) | NGATAAGNMNN    | AGATAAGCTAT    |
|        |             | 0.83987 |      |     |                |                |
| M00076 | V\$GATA2_01 | 4       | 8580 | (-) | NNNGATRNNN     | AGCTATGATG     |

|        |             |         |      |     |                |                |
|--------|-------------|---------|------|-----|----------------|----------------|
|        |             | 0.85241 |      |     |                |                |
| M00075 | V\$GATA1_01 | 9       | 8583 | (+) | SNNGATNNNN     | TATGATGTGT     |
|        |             | 0.86107 |      |     |                |                |
| M00076 | V\$GATA2_01 | 4       | 8583 | (+) | NNNGATRNNN     | TATGATGTGT     |
|        |             | 0.90742 |      |     |                |                |
| M00203 | V\$GATA_C   | 5       | 8605 | (-) | NGATAAGNMNN    | CATTTTATCT     |
|        |             | 0.83906 |      |     |                |                |
| M00126 | V\$GATA1_02 | 2       | 8606 | (-) | NNNNNGATANKGN  | ATTTTATCTTGAA  |
|        |             | 0.79862 |      |     |                |                |
| M00127 | V\$GATA1_03 | 8       | 8606 | (-) | RNSNNGATAANNGN | ATTTTATCTTGAA  |
|        |             | 0.91237 |      |     |                |                |
| M00128 | V\$GATA1_04 | 7       | 8606 | (-) | NNCWGATARNNNN  | ATTTTATCTTGA   |
|        |             | 0.78677 |      |     |                |                |
| M00075 | V\$GATA1_01 | 2       | 8608 | (-) | SNNGATNNNN     | TTTTATCTTG     |
|        |             | 0.81867 |      |     |                |                |
| M00076 | V\$GATA2_01 | 4       | 8608 | (-) | NNNGATRNNN     | TTTTATCTTG     |
|        |             |         |      |     |                |                |
| M00077 | V\$GATA3_01 | 0.8786  | 8608 | (-) | NNGATARNG      | TTTTATCTT      |
|        |             | 0.82230 |      |     |                |                |
| M00128 | V\$GATA1_04 | 4       | 8690 | (+) | NNCWGATARNNNN  | GTGAGATATATTC  |
|        |             |         |      |     |                |                |
| M00075 | V\$GATA1_01 | 0.80849 | 8691 | (+) | SNNGATNNNN     | TGAGATATAT     |
|        |             | 0.86242 |      |     |                |                |
| M00076 | V\$GATA2_01 | 7       | 8691 | (+) | NNNGATRNNN     | TGAGATATAT     |
|        |             | 0.83207 |      |     |                |                |
| M00077 | V\$GATA3_01 | 8       | 8692 | (+) | NNGATARNG      | GAGATATAT      |
|        |             | 0.84622 |      |     |                |                |
| M00203 | V\$GATA_C   | 6       | 8693 | (+) | NGATAAGNMNN    | AGATATATTC     |
|        |             | 0.79201 |      |     |                |                |
| M00127 | V\$GATA1_03 | 4       | 8716 | (-) | RNSNNGATAANNGN | TATATTAACATCAT |
|        |             | 0.86080 |      |     |                |                |
| M00075 | V\$GATA1_01 | 9       | 8721 | (-) | SNNGATNNNN     | TAACATCATC     |
|        |             | 0.83942 |      |     |                |                |
| M00076 | V\$GATA2_01 | 3       | 8721 | (-) | NNNGATRNNN     | TAACATCATC     |
|        |             | 0.83267 |      |     |                |                |
| M00075 | V\$GATA1_01 | 5       | 8724 | (-) | SNNGATNNNN     | CATCATCCAG     |
|        |             | 0.80604 |      |     |                |                |
| M00076 | V\$GATA2_01 | 4       | 8724 | (-) | NNNGATRNNN     | CATCATCCAG     |
|        |             | 0.87561 |      |     |                |                |
| M00075 | V\$GATA1_01 | 7       | 8731 | (+) | SNNGATNNNN     | CAGGATATCT     |
|        |             | 0.93685 |      |     |                |                |
| M00076 | V\$GATA2_01 | 2       | 8731 | (+) | NNNGATRNNN     | CAGGATATCT     |
|        |             | 0.81188 |      |     |                |                |
| M00128 | V\$GATA1_04 | 7       | 8731 | (-) | NNCWGATARNNNN  | CAGGATATCTTAA  |
|        |             | 0.80454 |      |     |                |                |
| M00075 | V\$GATA1_01 | 1       | 8733 | (-) | SNNGATNNNN     | GGATATCTTA     |
|        |             | 0.90978 |      |     |                |                |
| M00076 | V\$GATA2_01 | 8       | 8733 | (-) | NNNGATRNNN     | GGATATCTTA     |
|        |             | 0.87314 |      |     |                |                |
| M00075 | V\$GATA1_01 | 9       | 8798 | (+) | SNNGATNNNN     | GAAGATGTGC     |
|        |             | 0.88317 |      |     |                |                |
| M00076 | V\$GATA2_01 | 5       | 8798 | (+) | NNNGATRNNN     | GAAGATGTGC     |
|        |             | 0.85927 |      |     |                |                |
| M00203 | V\$GATA_C   | 3       | 8822 | (-) | NGATAAGNMNN    | CTGGGTATCT     |
|        |             |         |      |     |                |                |
| M00126 | V\$GATA1_02 | 0.81125 | 8823 | (-) | NNNNNGATANKGN  | TGGGTATCTGGTA  |
|        |             | 0.79617 |      |     |                |                |
| M00127 | V\$GATA1_03 | 8       | 8823 | (-) | RNSNNGATAANNGN | TGGGTATCTGGTA  |
|        |             | 0.91207 |      |     |                |                |
| M00128 | V\$GATA1_04 | 1       | 8823 | (-) | NNCWGATARNNNN  | TGGGTATCTGGT   |
|        |             |         |      |     |                |                |
| M00075 | V\$GATA1_01 | 0.86772 | 8825 | (-) | SNNGATNNNN     | GGTATCTGG      |
|        |             | 0.91204 |      |     |                |                |
| M00076 | V\$GATA2_01 | 3       | 8825 | (-) | NNNGATRNNN     | GGTATCTGG      |
|        |             | 0.84492 |      |     |                |                |
| M00077 | V\$GATA3_01 | 7       | 8825 | (-) | NNGATARNG      | GGTATCTG       |



|        |             |         |      |     |                |                |  |
|--------|-------------|---------|------|-----|----------------|----------------|--|
|        |             | 0.90325 |      |     |                |                |  |
| M00075 | V\$GATA1_01 | 8       | 8866 | (-) | SNNGATNNNN     | ATGCATCAGG     |  |
|        |             | 0.84303 |      |     |                |                |  |
| M00076 | V\$GATA2_01 | 1       | 8866 | (-) | NNNGATRNNN     | ATGCATCAGG     |  |
|        |             | 0.81937 |      |     |                |                |  |
| M00126 | V\$GATA1_02 | 5       | 8893 | (+) | NNNNNGATANKGNN | GTGTTGATAAATTA |  |
| M00127 | V\$GATA1_03 | 0.83807 | 8893 | (+) | RNSNNGATAANNGN | GTGTTGATAAATTA |  |
|        |             | 0.81525 |      |     |                |                |  |
| M00128 | V\$GATA1_04 | 7       | 8894 | (+) | NNCWGATARNNNN  | TGTTGATAAATTA  |  |
|        |             | 0.80256 |      |     |                |                |  |
| M00075 | V\$GATA1_01 | 7       | 8895 | (+) | SNNGATNNNN     | GTTGATAAAT     |  |
|        |             | 0.89934 |      |     |                |                |  |
| M00203 | V\$GATA_C   | 8       | 8897 | (+) | NGATAAGNMNN    | TGATAAATTAT    |  |
|        |             | 0.86393 |      |     |                |                |  |
| M00203 | V\$GATA_C   | 3       | 8899 | (-) | NGATAAGNMNN    | ATAAATTATCT    |  |
|        |             | 0.84937 |      |     |                |                |  |
| M00126 | V\$GATA1_02 | 5       | 8900 | (-) | NNNNNGATANKGNN | TAAATTATCTCTCC |  |
|        |             | 0.86599 |      |     |                |                |  |
| M00127 | V\$GATA1_03 | 7       | 8900 | (-) | RNSNNGATAANNGN | TAAATTATCTCTCC |  |
|        |             | 0.82904 |      |     |                |                |  |
| M00128 | V\$GATA1_04 | 4       | 8900 | (-) | NNCWGATARNNNN  | TAAATTATCTCTC  |  |
|        |             | 0.82132 |      |     |                |                |  |
| M00075 | V\$GATA1_01 | 3       | 8902 | (-) | SNNGATNNNN     | AATTATCTCT     |  |
| M00076 | V\$GATA2_01 | 0.85521 | 8902 | (-) | NNNGATRNNN     | AATTATCTCT     |  |
|        |             | 0.88391 |      |     |                |                |  |
| M00077 | V\$GATA3_01 | 7       | 8902 | (-) | NNGATARNG      | AATTATCTC      |  |
|        |             | 0.79103 |      |     |                |                |  |
| M00127 | V\$GATA1_03 | 4       | 8910 | (-) | RNSNNGATAANNGN | CTCCTTTTCAATAT |  |
|        |             | 0.82343 |      |     |                |                |  |
| M00126 | V\$GATA1_02 | 8       | 8916 | (-) | NNNNNGATANKGNN | TTCAATATCTGCTA |  |
|        |             | 0.87377 |      |     |                |                |  |
| M00128 | V\$GATA1_04 | 5       | 8916 | (-) | NNCWGATARNNNN  | TTCAATATCTGCT  |  |
| M00075 | V\$GATA1_01 | 0.9077  | 8918 | (-) | SNNGATNNNN     | CAATATCTGC     |  |
|        |             | 0.93008 |      |     |                |                |  |
| M00076 | V\$GATA2_01 | 6       | 8918 | (-) | NNNGATRNNN     | CAATATCTGC     |  |
|        |             | 0.89587 |      |     |                |                |  |
| M00077 | V\$GATA3_01 | 9       | 8918 | (-) | NNGATARNG      | CAATATCTG      |  |
|        |             | 0.79368 |      |     |                |                |  |
| M00075 | V\$GATA1_01 | 2       | 8951 | (+) | SNNGATNNNN     | ACAGATTCTA     |  |
| M00076 | V\$GATA2_01 | 0.7871  | 8951 | (+) | NNNGATRNNN     | ACAGATTCTA     |  |
| M00075 | V\$GATA1_01 | 0.82231 | 8968 | (+) | SNNGATNNNN     | ACTGATCCCT     |  |
|        |             | 0.77788 |      |     |                |                |  |
| M00075 | V\$GATA1_01 | 7       | 8968 | (-) | SNNGATNNNN     | ACTGATCCCT     |  |
|        |             | 0.82453 |      |     |                |                |  |
| M00076 | V\$GATA2_01 | 8       | 8968 | (+) | NNNGATRNNN     | ACTGATCCCT     |  |
|        |             | 0.81145 |      |     |                |                |  |
| M00076 | V\$GATA2_01 | 7       | 8968 | (-) | NNNGATRNNN     | ACTGATCCCT     |  |
|        |             | 0.83690 |      |     |                |                |  |
| M00203 | V\$GATA_C   | 6       | 8992 | (+) | NGATAAGNMNN    | TGACAAGTTTT    |  |
|        |             | 0.86220 |      |     |                |                |  |
| M00077 | V\$GATA3_01 | 6       | 9002 | (-) | NNGATARNG      | TTTAATCTC      |  |
|        |             | 0.84007 |      |     |                |                |  |
| M00075 | V\$GATA1_01 | 9       | 9009 | (+) | SNNGATNNNN     | TCAGATATTT     |  |
|        |             | 0.90257 |      |     |                |                |  |
| M00076 | V\$GATA2_01 | 1       | 9009 | (+) | NNNGATRNNN     | TCAGATATTT     |  |
|        |             | 0.82897 |      |     |                |                |  |
| M00077 | V\$GATA3_01 | 7       | 9010 | (+) | NNGATARNG      | CAGATATTT      |  |
|        |             | 0.83038 |      |     |                |                |  |
| M00203 | V\$GATA_C   | 2       | 9011 | (+) | NGATAAGNMNN    | AGATATTTAAT    |  |
|        |             | 0.81461 |      |     |                |                |  |
| M00076 | V\$GATA2_01 | 4       | 9062 | (+) | NNNGATRNNN     | TCAGATCTGA     |  |

|        |             |         |      |     |                |                |
|--------|-------------|---------|------|-----|----------------|----------------|
|        |             | 0.81461 |      |     |                |                |
| M00076 | V\$GATA2_01 | 4       | 9062 | (-) | NNNGATRNNN     | TCAGATCTGA     |
|        |             | 0.82230 |      |     |                |                |
| M00128 | V\$GATA1_04 | 4       | 9066 | (+) | NNCWGATARNNNN  | ATCTGATTAGCAC  |
|        |             | 0.81638 |      |     |                |                |
| M00075 | V\$GATA1_01 | 7       | 9067 | (+) | SNNGATNNNN     | TCTGATTAGC     |
|        |             | 0.81461 |      |     |                |                |
| M00076 | V\$GATA2_01 | 4       | 9067 | (+) | NNNGATRNNN     | TCTGATTAGC     |
|        |             | 0.82454 |      |     |                |                |
| M00077 | V\$GATA3_01 | 6       | 9068 | (+) | NNGATARNG      | CTGATTAGC      |
|        |             | 0.82942 |      |     |                |                |
| M00077 | V\$GATA3_01 | 6       | 9099 | (+) | NNGATARNG      | TAGATTTGA      |
|        |             | 0.80965 |      |     |                |                |
| M00076 | V\$GATA2_01 | 3       | 9144 | (-) | NNNGATRNNN     | CGGCATGTGA     |
|        |             | 0.78875 |      |     |                |                |
| M00126 | V\$GATA1_02 | 3       | 9147 | (+) | NNNNNGATANKGNN | CATGTGATATTAGA |
|        |             | 0.83149 |      |     |                |                |
| M00128 | V\$GATA1_04 | 5       | 9148 | (+) | NNCWGATARNNNN  | ATGTGATATTAGA  |
|        |             | 0.83316 |      |     |                |                |
| M00075 | V\$GATA1_01 | 9       | 9149 | (+) | SNNGATNNNN     | TGTGATATTA     |
|        |             | 0.86152 |      |     |                |                |
| M00076 | V\$GATA2_01 | 5       | 9149 | (+) | NNNGATRNNN     | TGTGATATTA     |
|        |             | 0.86043 |      |     |                |                |
| M00077 | V\$GATA3_01 | 4       | 9150 | (+) | NNGATARNG      | GTGATATTA      |
|        |             | 0.83031 |      |     |                |                |
| M00126 | V\$GATA1_02 | 3       | 9154 | (+) | NNNNNGATANKGNN | TATTAGATAGTTTC |
|        |             | 0.81801 |      |     |                |                |
| M00128 | V\$GATA1_04 | 5       | 9155 | (+) | NNCWGATARNNNN  | ATTAGATAGTTTC  |
|        |             | 0.83020 |      |     |                |                |
| M00075 | V\$GATA1_01 | 7       | 9156 | (+) | SNNGATNNNN     | TTAGATAGTT     |
|        |             | 0.84934 |      |     |                |                |
| M00076 | V\$GATA2_01 | 6       | 9156 | (+) | NNNGATRNNN     | TTAGATAGTT     |
|        |             | 0.87062 |      |     |                |                |
| M00077 | V\$GATA3_01 | 5       | 9157 | (+) | NNGATARNG      | TAGATAGTT      |
|        |             | 0.97514 |      |     |                |                |
| M00203 | V\$GATA_C   | 8       | 9164 | (-) | NGATAAGNMNN    | TTTCCTTATCT    |
|        |             | 0.8725  |      |     |                |                |
| M00126 | V\$GATA1_02 | 3       | 9165 | (-) | NNNNNGATANKGNN | TTCCTTATCTGCTG |
|        |             | 0.89784 |      |     |                |                |
| M00127 | V\$GATA1_03 | 4       | 9165 | (-) | RNSNNGATAANNGN | TTCCTTATCTGCTG |
|        |             | 0.97518 |      |     |                |                |
| M00128 | V\$GATA1_04 | 4       | 9165 | (-) | NNCWGATARNNNN  | TTCCTTATCTGCT  |
|        |             | 0.90177 |      |     |                |                |
| M00075 | V\$GATA1_01 | 7       | 9167 | (-) | SNNGATNNNN     | CCTTATCTGC     |
|        |             | 0.92151 |      |     |                |                |
| M00076 | V\$GATA2_01 | 6       | 9167 | (-) | NNNGATRNNN     | CCTTATCTGC     |
|        |             | 0.94860 |      |     |                |                |
| M00077 | V\$GATA3_01 | 4       | 9167 | (-) | NNGATARNG      | CCTTATCTG      |
|        |             | 0.81190 |      |     |                |                |
| M00076 | V\$GATA2_01 | 8       | 9253 | (+) | NNNGATRNNN     | AGACATAGTG     |
|        |             | 0.84406 |      |     |                |                |
| M00126 | V\$GATA1_02 | 3       | 9287 | (-) | NNNNNGATANKGNN | GCTAGTATCAGAAA |
|        |             | 0.82996 |      |     |                |                |
| M00128 | V\$GATA1_04 | 3       | 9287 | (-) | NNCWGATARNNNN  | GCTAGTATCAGAA  |
|        |             | 0.84649 |      |     |                |                |
| M00075 | V\$GATA1_01 | 6       | 9289 | (-) | SNNGATNNNN     | TAGTATCAGA     |
|        |             | 0.87280 |      |     |                |                |
| M00076 | V\$GATA2_01 | 1       | 9289 | (-) | NNNGATRNNN     | TAGTATCAGA     |
|        |             | 0.83168 |      |     |                |                |
| M00075 | V\$GATA1_01 | 8       | 9298 | (-) | SNNGATNNNN     | AAACATCATT     |
|        |             | 0.82228 |      |     |                |                |
| M00076 | V\$GATA2_01 | 2       | 9298 | (-) | NNNGATRNNN     | AAACATCATT     |
|        |             | 0.78430 |      |     |                |                |
| M00075 | V\$GATA1_01 | 4       | 9313 | (-) | SNNGATNNNN     | CCTCATCCAA     |
|        |             | 0.80333 |      |     |                |                |
| M00076 | V\$GATA2_01 | 8       | 9313 | (-) | NNNGATRNNN     | CCTCATCCAA     |

|        |             |                    |      |     |                |                |
|--------|-------------|--------------------|------|-----|----------------|----------------|
| M00077 | V\$GATA3_01 | 0.83119<br>2       | 9313 | (-) | NNGATARNG      | CCTCATCCA      |
| M00075 | V\$GATA1_01 | 0.83711<br>7       | 9341 | (-) | SNNGATNNNN     | AAAAATCAGA     |
| M00076 | V\$GATA2_01 | 0.82679<br>3       | 9341 | (-) | NNNGATRNNN     | AAAAATCAGA     |
| M00126 | V\$GATA1_02 | 0.77312<br>5       | 9357 | (+) | NNNNNGATANKGN  | ATGGTGCTAGTGGT |
| M00127 | V\$GATA1_03 | 0.81381<br>7       | 9357 | (+) | RNSNNGATAANNGN | ATGGTGCTAGTGGT |
| M00075 | V\$GATA1_01 | 0.81046<br>4       | 9359 | (+) | SNNGATNNNN     | GGTGCTAGTG     |
| M00127 | V\$GATA1_03 | 0.81136<br>7       | 9402 | (+) | RNSNNGATAANNGN | GGCTTGATCACTGG |
| M00075 | V\$GATA1_01 | 0.79516<br>3       | 9404 | (+) | SNNGATNNNN     | CTTGATCACT     |
| M00075 | V\$GATA1_01 | 0.83070<br>1       | 9421 | (+) | SNNGATNNNN     | GAAGATCCCC     |
| M00075 | V\$GATA1_01 | 0.83366<br>2       | 9421 | (-) | SNNGATNNNN     | GAAGATCCCC     |
| M00076 | V\$GATA2_01 | 0.87099<br>7       | 9421 | (+) | NNNGATRNNN     | GAAGATCCCC     |
| M00076 | V\$GATA2_01 | 0.86332<br>9       | 9421 | (-) | NNNGATRNNN     | GAAGATCCCC     |
| M00076 | V\$GATA2_01 | 0.82092<br>9       | 9438 | (+) | NNNGATRNNN     | GGGCATGGCA     |
| M00076 | V\$GATA2_01 | 0.78980<br>6       | 9438 | (-) | NNNGATRNNN     | GGGCATGGCA     |
| M00127 | V\$GATA1_03 | 0.79201<br>4       | 9498 | (-) | RNSNNGATAANNGN | AGGGCTATATCCAT |
| M00203 | V\$GATA_C   | 0.87635<br>9       | 9499 | (-) | NGATAAGNMNN    | GGGCTATATCC    |
| M00075 | V\$GATA1_01 | 0.80306<br>0.81867 | 9511 | (-) | SNNGATNNNN     | TAGGATCACA     |
| M00076 | V\$GATA2_01 | 4                  | 9511 | (+) | NNNGATRNNN     | TAGGATCACA     |
| M00076 | V\$GATA2_01 | 0.8083<br>0.80552  | 9511 | (-) | NNNGATRNNN     | TAGGATCACA     |
| M00075 | V\$GATA1_01 | 8                  | 9563 | (-) | SNNGATNNNN     | GCAAATCTGT     |
| M00076 | V\$GATA2_01 | 0.8083<br>0.84895  | 9563 | (-) | NNNGATRNNN     | GCAAATCTGT     |
| M00128 | V\$GATA1_04 | 8                  | 9591 | (+) | NNCWGATARNNNN  | TTCTGATATAATG  |
| M00075 | V\$GATA1_01 | 0.78578<br>5       | 9592 | (+) | SNNGATNNNN     | TCTGATATAA     |
| M00076 | V\$GATA2_01 | 0.82138<br>0.78484 | 9592 | (+) | NNNGATRNNN     | TCTGATATAA     |
| M00076 | V\$GATA2_01 | 4                  | 9655 | (-) | NNNGATRNNN     | AGTCATGTCC     |
| M00075 | V\$GATA1_01 | 0.80947<br>7       | 9699 | (-) | SNNGATNNNN     | GACCAACACC     |
| M00076 | V\$GATA2_01 | 0.78484<br>4       | 9723 | (+) | NNNGATRNNN     | GCTCATGTCC     |
| M00075 | V\$GATA1_01 | 0.84600<br>2       | 9737 | (+) | SNNGATNNNN     | AGTGATGCCA     |
| M00076 | V\$GATA2_01 | 0.83085<br>3       | 9737 | (+) | NNNGATRNNN     | AGTGATGCCA     |
| M00075 | V\$GATA1_01 | 0.79022<br>7       | 9742 | (-) | SNNGATNNNN     | TGCCATCCAA     |
| M00076 | V\$GATA2_01 | 0.82453<br>8       | 9742 | (-) | NNNGATRNNN     | TGCCATCCAA     |
| M00075 | V\$GATA1_01 | 0.82971<br>4       | 9755 | (-) | SNNGATNNNN     | TCTCATCCTC     |
| M00076 | V\$GATA2_01 | 0.85656<br>3       | 9755 | (-) | NNNGATRNNN     | TCTCATCCTC     |

|        |             |                    |       |     |                |                |
|--------|-------------|--------------------|-------|-----|----------------|----------------|
| M00077 | V\$GATA3_01 | 0.82055<br>8       | 9755  | (-) | NNGATARNG      | TCTCATCCT      |
| M00127 | V\$GATA1_03 | 0.82753<br>6       | 9768  | (-) | RNSNNGATAANNGN | CCTCTTCTCCTCTC |
| M00127 | V\$GATA1_03 | 0.79715<br>8       | 9773  | (-) | RNSNNGATAANNGN | TCTCCTCTCCTGCC |
| M00077 | V\$GATA3_01 | 0.87328<br>3       | 9787  | (-) | NNGATARNG      | TTCAATCTT      |
| M00075 | V\$GATA1_01 | 0.77245<br>8       | 9796  | (-) | SNNGATNNNN     | TCCCAACATC     |
| M00075 | V\$GATA1_01 | 0.93287<br>3       | 9799  | (-) | SNNGATNNNN     | CAACATCAGG     |
| M00076 | V\$GATA2_01 | 0.88498<br>0.83415 | 9799  | (-) | NNNGATRNNN     | CAACATCAGG     |
| M00075 | V\$GATA1_01 | 6<br>0.80153       | 9819  | (-) | SNNGATNNNN     | ATGCATCAGT     |
| M00076 | V\$GATA2_01 | 4                  | 9819  | (-) | NNNGATRNNN     | ATGCATCAGT     |
| M00075 | V\$GATA1_01 | 0.87463<br>0.81235 | 9832  | (-) | SNNGATNNNN     | TCAAATCAGG     |
| M00076 | V\$GATA2_01 | 9<br>0.82454       | 9832  | (-) | NNNGATRNNN     | TCAAATCAGG     |
| M00077 | V\$GATA3_01 | 6<br>0.82872       | 9832  | (-) | NNGATARNG      | TCAAATCAG      |
| M00075 | V\$GATA1_01 | 7<br>0.81326       | 9892  | (+) | SNNGATNNNN     | ACTGATTCT      |
| M00076 | V\$GATA2_01 | 1                  | 9892  | (+) | NNNGATRNNN     | ACTGATTCT      |
| M00075 | V\$GATA1_01 | 0.78381<br>0.83716 | 9904  | (+) | SNNGATNNNN     | TAGGATTGAC     |
| M00076 | V\$GATA2_01 | 7<br>0.86672       | 9904  | (+) | NNNGATRNNN     | TAGGATTGAC     |
| M00203 | V\$GATA_C   | 9<br>0.89338       | 9922  | (-) | NGATAAGNMNN    | TATTTATATCT    |
| M00128 | V\$GATA1_04 | 2<br>0.83265       | 9923  | (-) | NNCWGATARNNNN  | ATTTATATCTGAC  |
| M00076 | V\$GATA2_01 | 7<br>0.84093       | 9925  | (-) | NNNGATRNNN     | TTATATCTGA     |
| M00077 | V\$GATA3_01 | 9<br>0.87857       | 9925  | (-) | NNGATARNG      | TTATATCTG      |
| M00075 | V\$GATA1_01 | 8<br>0.84212       | 10006 | (+) | SNNGATNNNN     | AATGATTGGG     |
| M00076 | V\$GATA2_01 | 9<br>0.92556       | 10006 | (+) | NNNGATRNNN     | AATGATTGGG     |
| M00077 | V\$GATA3_01 | 5<br>0.77739       | 10007 | (+) | NNGATARNG      | ATGATTGGG      |
| M00075 | V\$GATA1_01 | 4<br>0.81506       | 10053 | (+) | SNNGATNNNN     | TAAGATTATT     |
| M00076 | V\$GATA2_01 | 5<br>0.83296       | 10053 | (+) | NNNGATRNNN     | TAAGATTATT     |
| M00077 | V\$GATA3_01 | 4                  | 10054 | (+) | NNGATARNG      | AAGATTATT      |
| M00127 | V\$GATA1_03 | 0.83072<br>0.82082 | 10087 | (+) | RNSNNGATAANNGN | AAAGGGATACCATG |
| M00075 | V\$GATA1_01 | 9                  | 10089 | (+) | SNNGATNNNN     | AGGGATACCA     |
| M00076 | V\$GATA2_01 | 0.88498            | 10089 | (+) | NNNGATRNNN     | AGGGATACCA     |
| M00126 | V\$GATA1_02 | 0.8075<br>0.87604  | 10095 | (+) | NNNNNGATANKGNN | ACCATGATAGATGG |
| M00127 | V\$GATA1_03 | 1<br>0.82751       | 10095 | (+) | RNSNNGATAANNGN | ACCATGATAGATGG |
| M00128 | V\$GATA1_04 | 2<br>0.90819       | 10096 | (+) | NNCWGATARNNNN  | CCATGATAGATGG  |
| M00075 | V\$GATA1_01 | 3                  | 10097 | (+) | SNNGATNNNN     | CATGATAGAT     |
| M00076 | V\$GATA2_01 | 0.88858            | 10097 | (+) | NNNGATRNNN     | CATGATAGAT     |

|        |             |         |       |     |                |                |
|--------|-------------|---------|-------|-----|----------------|----------------|
|        |             | 8       |       |     |                |                |
|        |             | 0.85157 |       |     |                |                |
| M00077 | V\$GATA3_01 | 3       | 10098 | (+) | NNGATARNG      | ATGATAGAT      |
|        |             | 0.78627 |       |     |                |                |
| M00075 | V\$GATA1_01 | 8       | 10101 | (+) | SNNGATNNNN     | ATAGATGGTA     |
|        |             | 0.84891 |       |     |                |                |
| M00077 | V\$GATA3_01 | 4       | 10102 | (+) | NNGATARNG      | TAGATGGTA      |
|        |             | 0.82082 |       |     |                |                |
| M00075 | V\$GATA1_01 | 9       | 10106 | (-) | SNNGATNNNN     | TGGTATCCAC     |
|        |             | 0.84212 |       |     |                |                |
| M00076 | V\$GATA2_01 | 9       | 10106 | (-) | NNNGATRNNN     | TGGTATCCAC     |
|        |             | 0.79861 |       |     |                |                |
| M00075 | V\$GATA1_01 | 8       | 10181 | (-) | SNNGATNNNN     | CCCCAGCTGG     |
|        |             | 0.77591 |       |     |                |                |
| M00075 | V\$GATA1_01 | 3       | 10267 | (-) | SNNGATNNNN     | CTACATCAAA     |
|        |             | 0.85389 |       |     |                |                |
| M00075 | V\$GATA1_01 | 9       | 10272 | (-) | SNNGATNNNN     | TCAAATCATG     |
|        |             |         |       |     |                |                |
| M00076 | V\$GATA2_01 | 0.80424 | 10272 | (-) | NNNGATRNNN     | TCAAATCATG     |
|        |             | 0.83030 |       |     |                |                |
| M00077 | V\$GATA3_01 | 6       | 10272 | (-) | NNGATARNG      | TCAAATCAT      |
|        |             | 0.77196 |       |     |                |                |
| M00075 | V\$GATA1_01 | 4       | 10278 | (+) | SNNGATNNNN     | CATGTTAGAG     |
|        |             | 0.78973 |       |     |                |                |
| M00075 | V\$GATA1_01 | 3       | 10295 | (+) | SNNGATNNNN     | AATGATTCAT     |
|        |             | 0.80181 |       |     |                |                |
| M00127 | V\$GATA1_03 | 3       | 10325 | (-) | RNSNNGATAANNGN | GTATTATTTTCCC  |
|        |             | 0.83958 |       |     |                |                |
| M00075 | V\$GATA1_01 | 5       | 10337 | (-) | SNNGATNNNN     | CCAAATCCAG     |
|        |             | 0.79115 |       |     |                |                |
| M00076 | V\$GATA2_01 | 9       | 10337 | (-) | NNNGATRNNN     | CCAAATCCAG     |
|        |             | 0.88696 |       |     |                |                |
| M00075 | V\$GATA1_01 | 9       | 10355 | (+) | SNNGATNNNN     | GGTGATTCCA     |
|        |             | 0.84167 |       |     |                |                |
| M00076 | V\$GATA2_01 | 8       | 10355 | (+) | NNNGATRNNN     | GGTGATTCCA     |
|        |             | 0.81957 |       |     |                |                |
| M00076 | V\$GATA2_01 | 6       | 10366 | (-) | NNNGATRNNN     | ACCTATGCCT     |
|        |             | 0.78833 |       |     |                |                |
| M00127 | V\$GATA1_03 | 9       | 10386 | (+) | RNSNNGATAANNGN | GCACAGATCATTGC |
|        |             | 0.79269 |       |     |                |                |
| M00075 | V\$GATA1_01 | 5       | 10388 | (-) | SNNGATNNNN     | ACAGATCATT     |
|        |             | 0.79070 |       |     |                |                |
| M00076 | V\$GATA2_01 | 8       | 10388 | (+) | NNNGATRNNN     | ACAGATCATT     |
|        |             | 0.79251 |       |     |                |                |
| M00076 | V\$GATA2_01 | 2       | 10388 | (-) | NNNGATRNNN     | ACAGATCATT     |
|        |             | 0.91905 |       |     |                |                |
| M00075 | V\$GATA1_01 | 2       | 10442 | (-) | SNNGATNNNN     | AGGAATCAGG     |
|        |             | 0.86603 |       |     |                |                |
| M00076 | V\$GATA2_01 | 5       | 10442 | (-) | NNNGATRNNN     | AGGAATCAGG     |
|        |             | 0.81342 |       |     |                |                |
| M00075 | V\$GATA1_01 | 5       | 10449 | (-) | SNNGATNNNN     | AGGGATCCCA     |
|        |             | 0.82047 |       |     |                |                |
| M00076 | V\$GATA2_01 | 8       | 10449 | (+) | NNNGATRNNN     | AGGGATCCCA     |
|        |             | 0.88272 |       |     |                |                |
| M00076 | V\$GATA2_01 | 4       | 10449 | (-) | NNNGATRNNN     | AGGGATCCCA     |
|        |             | 0.84402 |       |     |                |                |
| M00075 | V\$GATA1_01 | 8       | 10506 | (+) | SNNGATNNNN     | GTTGATTGAT     |
|        |             |         |       |     |                |                |
| M00076 | V\$GATA2_01 | 0.78304 | 10510 | (-) | NNNGATRNNN     | ATTGATCTCA     |
|        |             | 0.89406 |       |     |                |                |
| M00203 | V\$GATA_C   | 6       | 10542 | (-) | NGATAAGNMNN    | TATAGTTATCT    |
|        |             | 0.79812 |       |     |                |                |
| M00126 | V\$GATA1_02 | 5       | 10543 | (-) | NNNNNGATANKGN  | ATAGTTATCTTCAC |
|        |             | 0.92087 |       |     |                |                |
| M00127 | V\$GATA1_03 | 2       | 10543 | (-) | RNSNNGATAANNGN | ATAGTTATCTTCAC |

|        |             |                    |       |     |                |                |
|--------|-------------|--------------------|-------|-----|----------------|----------------|
| M00128 | V\$GATA1_04 | 0.90042<br>9       | 10543 | (-) | NNCWGATARNNNN  | ATAGTTATCTTCA  |
| M00075 | V\$GATA1_01 | 0.85735<br>4       | 10545 | (-) | SNNGATNNNN     | AGTTATCTTC     |
| M00076 | V\$GATA2_01 | 0.91294<br>5       | 10545 | (-) | NNNGATRNNN     | AGTTATCTTC     |
| M00077 | V\$GATA3_01 | 0.85068<br>7       | 10545 | (-) | NNGATARNG      | AGTTATCTT      |
| M00075 | V\$GATA1_01 | 0.81589<br>3       | 10645 | (-) | SNNGATNNNN     | AAAAATCTCT     |
| M00076 | V\$GATA2_01 | 0.80559<br>3       | 10645 | (-) | NNNGATRNNN     | AAAAATCTCT     |
| M00127 | V\$GATA1_03 | 0.79470<br>8       | 10659 | (-) | RNSNNGATAANNGN | CCCCTAATCCCTAG |
| M00075 | V\$GATA1_01 | 0.81688<br>1       | 10661 | (-) | SNNGATNNNN     | CCTAATCCCT     |
| M00076 | V\$GATA2_01 | 0.82453<br>8       | 10661 | (-) | NNNGATRNNN     | CCTAATCCCT     |
| M00077 | V\$GATA3_01 | 0.89277<br>8       | 10661 | (-) | NNGATARNG      | CCTAATCCC      |
| M00127 | V\$GATA1_03 | 0.81014<br>2       | 10684 | (-) | RNSNNGATAANNGN | TTTGCTATGTTTAT |
| M00076 | V\$GATA2_01 | 0.82679<br>3       | 10686 | (-) | NNNGATRNNN     | TGCTATGTTC     |
| M00077 | V\$GATA3_01 | 0.83872<br>4       | 10728 | (-) | NNGATARNG      | TTTAATCAC      |
| M00126 | V\$GATA1_02 | 0.87656<br>3       | 10733 | (+) | NNNNNGATANKGNN | TCACAGATAAGCTG |
| M00127 | V\$GATA1_03 | 0.79617<br>8       | 10733 | (+) | RNSNNGATAANNGN | TCACAGATAAGCTG |
| M00128 | V\$GATA1_04 | 0.85018<br>4       | 10734 | (+) | NNCWGATARNNNN  | CACAGATAAGCTG  |
| M00075 | V\$GATA1_01 | 0.81095<br>8       | 10735 | (+) | SNNGATNNNN     | ACAGATAAGC     |
| M00076 | V\$GATA2_01 | 0.85791<br>6       | 10735 | (+) | NNNGATRNNN     | ACAGATAAGC     |
| M00077 | V\$GATA3_01 | 0.88170<br>1       | 10736 | (+) | NNGATARNG      | CAGATAAGC      |
| M00203 | V\$GATA_C   | 0.87325<br>3       | 10737 | (+) | NGATAAGNMNN    | AGATAAGCTGT    |
| M00075 | V\$GATA1_01 | 0.88104<br>6       | 10745 | (+) | SNNGATNNNN     | TGTGATGTGT     |
| M00076 | V\$GATA2_01 | 0.86919<br>3       | 10745 | (+) | NNNGATRNNN     | TGTGATGTGT     |
| M00203 | V\$GATA_C   | 0.90742<br>5       | 10767 | (-) | NGATAAGNMNN    | CATTTTATCT     |
| M00126 | V\$GATA1_02 | 0.83906<br>2       | 10768 | (-) | NNNNNGATANKGNN | ATTTTATCTTGAA  |
| M00127 | V\$GATA1_03 | 0.79862<br>8       | 10768 | (-) | RNSNNGATAANNGN | ATTTTATCTTGAA  |
| M00128 | V\$GATA1_04 | 0.91237<br>7       | 10768 | (-) | NNCWGATARNNNN  | ATTTTATCTTGA   |
| M00075 | V\$GATA1_01 | 0.78677<br>2       | 10770 | (-) | SNNGATNNNN     | TTTTATCTTG     |
| M00076 | V\$GATA2_01 | 0.81867<br>4       | 10770 | (-) | NNNGATRNNN     | TTTTATCTTG     |
| M00077 | V\$GATA3_01 | 0.8786<br>0.81985  | 10770 | (-) | NNGATARNG      | TTTTATCTT      |
| M00128 | V\$GATA1_04 | 3                  | 10856 | (+) | NNCWGATARNNNN  | GTGAGATATATTT  |
| M00075 | V\$GATA1_01 | 0.80849<br>0.86242 | 10857 | (+) | SNNGATNNNN     | TGAGATATAT     |
| M00076 | V\$GATA2_01 | 7<br>0.83207       | 10857 | (+) | NNNGATRNNN     | TGAGATATAT     |
| M00077 | V\$GATA3_01 | 8                  | 10858 | (+) | NNGATARNG      | GAGATATAT      |

|        |             |         |       |     |                |                |
|--------|-------------|---------|-------|-----|----------------|----------------|
|        |             | 0.81688 |       |     |                |                |
| M00075 | V\$GATA1_01 | 1       | 10898 | (+) | SNNGATNNNN     | TAAGATGTGC     |
|        |             | 0.86874 |       |     |                |                |
| M00076 | V\$GATA2_01 | 2       | 10898 | (+) | NNNGATRNNN     | TAAGATGTGC     |
|        |             | 0.83562 |       |     |                |                |
| M00126 | V\$GATA1_02 | 5       | 10926 | (-) | NNNNNGATANKGNN | TAAACTATCTGCTG |
| M00127 | V\$GATA1_03 | 0.83317 | 10926 | (-) | RNSNNGATAANNGN | TAAACTATCTGCTG |
| M00128 | V\$GATA1_04 | 0.85815 | 10926 | (-) | NNCWGATARNNNN  | TAAACTATCTGCT  |
|        |             | 0.94323 |       |     |                |                |
| M00075 | V\$GATA1_01 | 8       | 10928 | (-) | SNNGATNNNN     | AACTATCTGC     |
|        |             | 0.95354 |       |     |                |                |
| M00076 | V\$GATA2_01 | 1       | 10928 | (-) | NNNGATRNNN     | AACTATCTGC     |
|        |             | 0.88923 |       |     |                |                |
| M00077 | V\$GATA3_01 | 3       | 10928 | (-) | NNGATARNG      | AACTATCTG      |
|        |             | 0.84031 |       |     |                |                |
| M00126 | V\$GATA1_02 | 3       | 10934 | (+) | NNNNNGATANKGNN | CTGCTGATAGTATG |
|        |             | 0.86501 |       |     |                |                |
| M00127 | V\$GATA1_03 | 7       | 10934 | (+) | RNSNNGATAANNGN | CTGCTGATAGTATG |
|        |             | 0.85937 |       |     |                |                |
| M00128 | V\$GATA1_04 | 5       | 10935 | (+) | NNCWGATARNNNN  | TGCTGATAGTATG  |
| M00075 | V\$GATA1_01 | 0.92843 | 10936 | (+) | SNNGATNNNN     | GCTGATAGTA     |
|        |             | 0.91249 |       |     |                |                |
| M00076 | V\$GATA2_01 | 4       | 10936 | (+) | NNNGATRNNN     | GCTGATAGTA     |
|        |             | 0.89765 |       |     |                |                |
| M00077 | V\$GATA3_01 | 2       | 10937 | (+) | NNGATARNG      | CTGATAGTA      |
|        |             | 0.80656 |       |     |                |                |
| M00126 | V\$GATA1_02 | 2       | 10943 | (+) | NNNNNGATANKGNN | GTATGGATAGATCA |
|        |             | 0.78172 |       |     |                |                |
| M00127 | V\$GATA1_03 | 5       | 10943 | (+) | RNSNNGATAANNGN | GTATGGATAGATCA |
|        |             | 0.77788 |       |     |                |                |
| M00075 | V\$GATA1_01 | 7       | 10945 | (+) | SNNGATNNNN     | ATGGATAGAT     |
|        |             | 0.79115 |       |     |                |                |
| M00076 | V\$GATA2_01 | 9       | 10945 | (+) | NNNGATRNNN     | ATGGATAGAT     |
|        |             | 0.89189 |       |     |                |                |
| M00203 | V\$GATA_C   | 2       | 10947 | (+) | NGATAAGNMNN    | GGATAGATCAA    |
|        |             | 0.85937 |       |     |                |                |
| M00126 | V\$GATA1_02 | 5       | 10958 | (-) | NNNNNGATANKGNN | AAAAGTATCTATTA |
| M00075 | V\$GATA1_01 | 0.79615 | 10960 | (-) | SNNGATNNNN     | AAGTATCTAT     |
| M00076 | V\$GATA2_01 | 0.79161 | 10960 | (-) | NNNGATRNNN     | AAGTATCTAT     |
|        |             | 0.87413 |       |     |                |                |
| M00075 | V\$GATA1_01 | 6       | 10973 | (-) | SNNGATNNNN     | CACAATCCAG     |
| M00076 | V\$GATA2_01 | 0.82138 | 10973 | (-) | NNNGATRNNN     | CACAATCCAG     |
|        |             | 0.85866 |       |     |                |                |
| M00077 | V\$GATA3_01 | 2       | 10973 | (-) | NNGATARNG      | CACAATCCA      |
|        |             | 0.78134 |       |     |                |                |
| M00075 | V\$GATA1_01 | 3       | 10993 | (-) | SNNGATNNNN     | TAGCATCAAT     |
|        |             | 0.79022 |       |     |                |                |
| M00075 | V\$GATA1_01 | 7       | 10997 | (-) | SNNGATNNNN     | ATCAATCCTT     |
| M00076 | V\$GATA2_01 | 0.8083  | 10997 | (-) | NNNGATRNNN     | ATCAATCCTT     |
|        |             | 0.84649 |       |     |                |                |
| M00075 | V\$GATA1_01 | 6       | 11009 | (-) | SNNGATNNNN     | GAGTATCATA     |
|        |             | 0.89084 |       |     |                |                |
| M00076 | V\$GATA2_01 | 3       | 11009 | (-) | NNNGATRNNN     | GAGTATCATA     |
|        |             | 0.81190 |       |     |                |                |
| M00076 | V\$GATA2_01 | 8       | 11012 | (+) | NNNGATRNNN     | TATCATAGTT     |
|        |             | 0.83514 |       |     |                |                |
| M00075 | V\$GATA1_01 | 3       | 11069 | (+) | SNNGATNNNN     | CTTGATTAGT     |
| M00203 | V\$GATA_C   | 0.83908 | 11090 | (+) | NGATAAGNMNN    | GGAGAAGGACT    |
|        |             | 0.90866 |       |     |                |                |
| M00203 | V\$GATA_C   | 7       | 11095 | (-) | NGATAAGNMNN    | AGGACTTGCT     |

|        |             |                    |       |     |                |                |
|--------|-------------|--------------------|-------|-----|----------------|----------------|
| M00203 | V\$GATA_C   | 0.86206<br>9       | 11257 | (-) | NGATAAGNMNN    | TAGATATATCA    |
| M00126 | V\$GATA1_02 | 0.7825<br>0.86090  | 11258 | (-) | NNNNNGATANKGNN | AGATATATCAGTAC |
| M00128 | V\$GATA1_04 | 7<br>0.84436       | 11258 | (-) | NNCWGATARNNNN  | AGATATATCAGTA  |
| M00203 | V\$GATA_C   | 2<br>0.81293       | 11258 | (+) | NGATAAGNMNN    | AGATATATCAG    |
| M00075 | V\$GATA1_01 | 2<br>0.81867       | 11260 | (-) | SNNGATNNNN     | ATATATCAGT     |
| M00076 | V\$GATA2_01 | 4<br>0.79911       | 11260 | (-) | NNNGATRNNN     | ATATATCAGT     |
| M00075 | V\$GATA1_01 | 2<br>0.86043       | 11272 | (-) | SNNGATNNNN     | CTCAATCAAA     |
| M00077 | V\$GATA3_01 | 4<br>0.85896       | 11272 | (-) | NNGATARNG      | CTCAATCAA      |
| M00203 | V\$GATA_C   | 2<br>0.84031       | 11278 | (-) | NGATAAGNMNN    | CAAATTTATCA    |
| M00126 | V\$GATA1_02 | 3<br>0.82141       | 11279 | (-) | NNNNNGATANKGNN | AAATTTATCATTAC |
| M00127 | V\$GATA1_03 | 1                  | 11279 | (-) | RNSNNGATAANNGN | AAATTTATCATTAC |
| M00128 | V\$GATA1_04 | 0.85815<br>0.77393 | 11279 | (-) | NNCWGATARNNNN  | AAATTTATCATTA  |
| M00075 | V\$GATA1_01 | 9                  | 11281 | (-) | SNNGATNNNN     | ATTTATCATT     |
| M00076 | V\$GATA2_01 | 0.79567<br>0.82321 | 11281 | (-) | NNNGATRNNN     | ATTTATCATT     |
| M00077 | V\$GATA3_01 | 7<br>0.83224       | 11281 | (-) | NNGATARNG      | ATTTATCAT      |
| M00203 | V\$GATA_C   | 6                  | 11288 | (-) | NGATAAGNMNN    | ATTACTAATCT    |
| M00077 | V\$GATA3_01 | 0.82942<br>0.81906 | 11291 | (-) | NNGATARNG      | ACTAATCTA      |
| M00126 | V\$GATA1_02 | 3<br>0.84313       | 11334 | (+) | NNNNNGATANKGNN | GTTATGATATGATT |
| M00128 | V\$GATA1_04 | 7<br>0.81688       | 11335 | (+) | NNCWGATARNNNN  | TTATGATATGATT  |
| M00075 | V\$GATA1_01 | 1                  | 11336 | (+) | SNNGATNNNN     | TATGATATGA     |
| M00076 | V\$GATA2_01 | 0.85972<br>0.86397 | 11336 | (+) | NNNGATRNNN     | TATGATATGA     |
| M00077 | V\$GATA3_01 | 9<br>0.84311       | 11337 | (+) | NNGATARNG      | ATGATATGA      |
| M00203 | V\$GATA_C   | 9<br>0.81740       | 11338 | (+) | NGATAAGNMNN    | TGATATGATTA    |
| M00128 | V\$GATA1_04 | 2<br>0.82181       | 11340 | (+) | NNCWGATARNNNN  | ATATGATTAGGCC  |
| M00075 | V\$GATA1_01 | 6<br>0.82318       | 11341 | (+) | SNNGATNNNN     | TATGATTAGG     |
| M00076 | V\$GATA2_01 | 4<br>0.89720       | 11341 | (+) | NNNGATRNNN     | TATGATTAGG     |
| M00077 | V\$GATA3_01 | 9<br>0.79431       | 11342 | (+) | NNGATARNG      | ATGATTAGG      |
| M00076 | V\$GATA2_01 | 7<br>0.84754       | 11351 | (-) | NNNGATRNNN     | CCGTAACCTC     |
| M00076 | V\$GATA2_01 | 2<br>0.80469       | 11387 | (+) | NNNGATRNNN     | GCTCATAGTG     |
| M00076 | V\$GATA2_01 | 1<br>0.80700       | 11419 | (+) | NNNGATRNNN     | GCTCATAGTA     |
| M00075 | V\$GATA1_01 | 9<br>0.78484       | 11447 | (+) | SNNGATNNNN     | ATAGATGGTC     |
| M00076 | V\$GATA2_01 | 4<br>0.79386       | 11447 | (+) | NNNGATRNNN     | ATAGATGGTC     |
| M00076 | V\$GATA2_01 | 6                  | 11466 | (+) | NNNGATRNNN     | TAGCATAGAC     |



|        |             |                    |       |     |                |                |
|--------|-------------|--------------------|-------|-----|----------------|----------------|
| M00127 | V\$GATA1_03 | 0.81136<br>7       | 11505 | (-) | RNSNNGATAANNGN | TCTGTTATTCACAC |
| M00126 | V\$GATA1_02 | 0.78906<br>2       | 11536 | (+) | NNNNNGATANKGNN | ACTAAGATAAAGAG |
| M00127 | V\$GATA1_03 | 0.81528<br>7       | 11536 | (+) | RNSNNGATAANNGN | ACTAAGATAAAGAG |
| M00128 | V\$GATA1_04 | 0.87622<br>5       | 11537 | (+) | NNCWGATARNNNN  | CTAAGATAAAGAG  |
| M00075 | V\$GATA1_01 | 0.77295<br>2       | 11538 | (+) | SNNGATNNNN     | TAAGATAAAG     |
| M00076 | V\$GATA2_01 | 0.85250<br>3       | 11538 | (+) | NNNGATRNNN     | TAAGATAAAG     |
| M00077 | V\$GATA3_01 | 0.91360<br>2       | 11539 | (+) | NNGATARNG      | AAGATAAAG      |
| M00203 | V\$GATA_C   | 0.89593<br>0.78825 | 11540 | (+) | NGATAAGNMNN    | AGATAAAGAGA    |
| M00075 | V\$GATA1_01 | 0.78825<br>3       | 11546 | (+) | SNNGATNNNN     | AGAGATCTCT     |
| M00075 | V\$GATA1_01 | 0.78825<br>3       | 11546 | (-) | SNNGATNNNN     | AGAGATCTCT     |
| M00076 | V\$GATA2_01 | 0.82453<br>8       | 11546 | (+) | NNNGATRNNN     | AGAGATCTCT     |
| M00076 | V\$GATA2_01 | 0.82453<br>8       | 11546 | (-) | NNNGATRNNN     | AGAGATCTCT     |
| M00128 | V\$GATA1_04 | 0.82628<br>7       | 11578 | (+) | NNCWGATARNNNN  | ACCATATAAGACT  |
| M00075 | V\$GATA1_01 | 0.79220<br>1       | 11596 | (-) | SNNGATNNNN     | CTAAATCTAG     |
| M00077 | V\$GATA3_01 | 0.82366<br>0.80454 | 11596 | (-) | NNGATARNG      | CTAAATCTA      |
| M00075 | V\$GATA1_01 | 0.89084<br>1       | 11605 | (-) | SNNGATNNNN     | GAATATCTTA     |
| M00076 | V\$GATA2_01 | 0.83473<br>3       | 11605 | (-) | NNNGATRNNN     | GAATATCTTA     |
| M00077 | V\$GATA3_01 | 0.86343<br>6       | 11605 | (-) | NNGATARNG      | GAATATCTT      |
| M00126 | V\$GATA1_02 | 0.86343<br>8       | 11710 | (+) | NNNNNGATANKGNN | TATTTGATAATGTT |
| M00128 | V\$GATA1_04 | 0.84038<br>0.79713 | 11711 | (+) | NNCWGATARNNNN  | ATTTGATAATGTT  |
| M00075 | V\$GATA1_01 | 0.79972<br>7       | 11712 | (+) | SNNGATNNNN     | TTTGATAATG     |
| M00076 | V\$GATA2_01 | 0.88568<br>9       | 11712 | (+) | NNNGATRNNN     | TTTGATAATG     |
| M00077 | V\$GATA3_01 | 0.85523<br>9       | 11713 | (+) | NNGATARNG      | TTGATAATG      |
| M00203 | V\$GATA_C   | 0.84718<br>5       | 11714 | (+) | NGATAAGNMNN    | TGATAATGTTT    |
| M00126 | V\$GATA1_02 | 0.88817<br>7       | 11738 | (+) | NNNNNGATANKGNN | TAAAAGATAAAATG |
| M00128 | V\$GATA1_04 | 0.8786<br>4        | 11739 | (+) | NNCWGATARNNNN  | AAAAGATAAAATG  |
| M00077 | V\$GATA3_01 | 0.85616<br>9       | 11741 | (+) | NNGATARNG      | AAGATAAAA      |
| M00203 | V\$GATA_C   | 0.77887<br>7       | 11742 | (+) | NGATAAGNMNN    | AGATAAAATGT    |
| M00075 | V\$GATA1_01 | 0.79318<br>5       | 11758 | (+) | SNNGATNNNN     | AGTGATTAAT     |
| M00075 | V\$GATA1_01 | 0.80181<br>9       | 11804 | (+) | SNNGATNNNN     | GTGGATTATT     |
| M00127 | V\$GATA1_03 | 0.79062<br>3       | 11805 | (-) | RNSNNGATAANNGN | TGGATTATTTCCC  |
| M00126 | V\$GATA1_02 | 0.83088<br>5       | 11817 | (+) | NNNNNGATANKGNN | CCCCAGATATGAAA |
| M00128 | V\$GATA1_04 | 2                  | 11818 | (+) | NNCWGATARNNNN  | CCCAGATATGAAA  |

|        |             |         |       |     |                |                |
|--------|-------------|---------|-------|-----|----------------|----------------|
|        |             | 0.87759 |       |     |                |                |
| M00075 | V\$GATA1_01 | 1       | 11819 | (+) | SNNGATNNNN     | CCAGATATGA     |
|        |             | 0.88813 |       |     |                |                |
| M00076 | V\$GATA2_01 | 7       | 11819 | (+) | NNNGATRNNN     | CCAGATATGA     |
|        |             | 0.88170 |       |     |                |                |
| M00077 | V\$GATA3_01 | 1       | 11820 | (+) | NNGATARNG      | CAGATATGA      |
| M00203 | V\$GATA_C   | 0.89096 | 11821 | (+) | NGATAAGNMNN    | AGATATGAAAC    |
|        |             | 0.77245 |       |     |                |                |
| M00075 | V\$GATA1_01 | 8       | 11834 | (+) | SNNGATNNNN     | ATAGATTCTT     |
|        |             | 0.94066 |       |     |                |                |
| M00203 | V\$GATA_C   | 5       | 11838 | (-) | NGATAAGNMNN    | ATTCTTTATCC    |
| M00126 | V\$GATA1_02 | 0.78375 | 11839 | (-) | NNNNNGATANKGNN | TTCTTTATCCTTCC |
|        |             | 0.86550 |       |     |                |                |
| M00127 | V\$GATA1_03 | 7       | 11839 | (-) | RNSNNGATAANNGN | TTCTTTATCCTTCC |
|        |             | 0.84160 |       |     |                |                |
| M00128 | V\$GATA1_04 | 5       | 11839 | (-) | NNCWGATARNNNN  | TTCTTTATCCTTC  |
|        |             | 0.83446 |       |     |                |                |
| M00076 | V\$GATA2_01 | 1       | 11841 | (-) | NNNGATRNNN     | CTTTATCCTT     |
|        |             | 0.86840 |       |     |                |                |
| M00077 | V\$GATA3_01 | 9       | 11841 | (-) | NNGATARNG      | CTTTATCCT      |
|        |             | 0.82435 |       |     |                |                |
| M00127 | V\$GATA1_03 | 1       | 11953 | (-) | RNSNNGATAANNGN | ATACTAATCTTCAT |
|        |             | 0.84600 |       |     |                |                |
| M00075 | V\$GATA1_01 | 2       | 11955 | (-) | SNNGATNNNN     | ACTAATCTTC     |
|        |             | 0.83581 |       |     |                |                |
| M00076 | V\$GATA2_01 | 4       | 11955 | (-) | NNNGATRNNN     | ACTAATCTTC     |
|        |             | 0.85378 |       |     |                |                |
| M00077 | V\$GATA3_01 | 8       | 11955 | (-) | NNGATARNG      | ACTAATCTT      |
|        |             | 0.82055 |       |     |                |                |
| M00077 | V\$GATA3_01 | 8       | 11966 | (+) | NNGATARNG      | TAGATGATA      |
|        |             | 0.82230 |       |     |                |                |
| M00128 | V\$GATA1_04 | 4       | 11967 | (+) | NNCWGATARNNNN  | AGATGATATATTC  |
|        |             | 0.85686 |       |     |                |                |
| M00075 | V\$GATA1_01 | 1       | 11968 | (+) | SNNGATNNNN     | GATGATATAT     |
|        |             | 0.85746 |       |     |                |                |
| M00076 | V\$GATA2_01 | 5       | 11968 | (+) | NNNGATRNNN     | GATGATATAT     |
|        |             | 0.84094 |       |     |                |                |
| M00203 | V\$GATA_C   | 4       | 11970 | (+) | NGATAAGNMNN    | TGATATATTCT    |
|        |             | 0.78578 |       |     |                |                |
| M00075 | V\$GATA1_01 | 5       | 12003 | (-) | SNNGATNNNN     | TTACATCAGA     |
|        |             | 0.79296 |       |     |                |                |
| M00076 | V\$GATA2_01 | 3       | 12003 | (-) | NNNGATRNNN     | TTACATCAGA     |
|        |             | 0.80132 |       |     |                |                |
| M00127 | V\$GATA1_03 | 3       | 12009 | (+) | RNSNNGATAANNGN | CAGAAGATATCTAG |
| M00128 | V\$GATA1_04 | 0.86152 | 12010 | (+) | NNCWGATARNNNN  | AGAAGATATCTAG  |
|        |             | 0.87561 |       |     |                |                |
| M00075 | V\$GATA1_01 | 7       | 12011 | (+) | SNNGATNNNN     | GAAGATATCT     |
| M00076 | V\$GATA2_01 | 0.92783 | 12011 | (+) | NNNGATRNNN     | GAAGATATCT     |
|        |             | 0.84402 |       |     |                |                |
| M00075 | V\$GATA1_01 | 8       | 12013 | (-) | SNNGATNNNN     | AGATATCTAG     |
|        |             | 0.84077 |       |     |                |                |
| M00076 | V\$GATA2_01 | 6       | 12013 | (-) | NNNGATRNNN     | AGATATCTAG     |
|        |             | 0.78270 |       |     |                |                |
| M00127 | V\$GATA1_03 | 5       | 12017 | (+) | RNSNNGATAANNGN | ATCTAGGTAACCTA |
|        |             | 0.80108 |       |     |                |                |
| M00076 | V\$GATA2_01 | 3       | 12031 | (+) | NNNGATRNNN     | GAACATATTT     |
|        |             | 0.85562 |       |     |                |                |
| M00126 | V\$GATA1_02 | 5       | 12119 | (+) | NNNNNGATANKGNN | ATAATGATAATATG |
|        |             | 0.88853 |       |     |                |                |
| M00127 | V\$GATA1_03 | 5       | 12119 | (+) | RNSNNGATAANNGN | ATAATGATAATATG |
|        |             | 0.84528 |       |     |                |                |
| M00128 | V\$GATA1_04 | 2       | 12120 | (+) | NNCWGATARNNNN  | TAATGATAATATG  |

|        |             |                    |       |     |                |                |
|--------|-------------|--------------------|-------|-----|----------------|----------------|
| M00075 | V\$GATA1_01 | 0.77788<br>7       | 12121 | (+) | SNNGATNNNN     | AATGATAATA     |
| M00076 | V\$GATA2_01 | 0.80604<br>4       | 12121 | (+) | NNNGATRNNN     | AATGATAATA     |
| M00077 | V\$GATA3_01 | 0.87505<br>5       | 12122 | (+) | NNGATARNG      | ATGATAATA      |
| M00075 | V\$GATA1_01 | 0.77245<br>8       | 12191 | (-) | SNNGATNNNN     | TCCTCTCAGG     |
| M00127 | V\$GATA1_03 | 0.79152<br>4       | 12237 | (-) | RNSNNGATAANNGN | GTAGTAATCAATCT |
| M00075 | V\$GATA1_01 | 0.82379<br>1       | 12243 | (-) | SNNGATNNNN     | ATCAATCTGA     |
| M00076 | V\$GATA2_01 | 0.83446<br>1       | 12243 | (-) | NNNGATRNNN     | ATCAATCTGA     |
| M00077 | V\$GATA3_01 | 0.83562<br>3       | 12243 | (-) | NNGATARNG      | ATCAATCTG      |
| M00128 | V\$GATA1_04 | 0.81066<br>2       | 12247 | (+) | NNCWGATARNNNN  | ATCTGAGAAAGGA  |
| M00075 | V\$GATA1_01 | 0.78479<br>8       | 12306 | (-) | SNNGATNNNN     | CAGTCTCACC     |
| M00075 | V\$GATA1_01 | 0.78479<br>8       | 12319 | (-) | SNNGATNNNN     | CAGCAGCACC     |
| M00076 | V\$GATA2_01 | 0.7871             | 12366 | (-) | NNNGATRNNN     | GGTTATGTTA     |
| M00076 | V\$GATA2_01 | 0.7871             | 12384 | (-) | NNNGATRNNN     | GGTTATGTTA     |
| M00128 | V\$GATA1_04 | 0.8125<br>0.87542  | 12397 | (-) | NNCWGATARNNNN  | TCTCTTTTCAGGT  |
| M00203 | V\$GATA_C   | 7<br>0.78156       | 12418 | (-) | NGATAAGNMNN    | ATTTTATATCT    |
| M00126 | V\$GATA1_02 | 3<br>0.84252       | 12419 | (-) | NNNNNGATANKGNN | TTTTATATCTTTAT |
| M00128 | V\$GATA1_04 | 5<br>0.79206       | 12419 | (-) | NNCWGATARNNNN  | TTTTATATCTTTA  |
| M00076 | V\$GATA2_01 | 1<br>0.84669       | 12421 | (-) | NNNGATRNNN     | TTATATCTTT     |
| M00077 | V\$GATA3_01 | 9<br>0.80181       | 12421 | (-) | NNGATARNG      | TTATATCTT      |
| M00127 | V\$GATA1_03 | 3<br>0.85389       | 12425 | (-) | RNSNNGATAANNGN | ATCTTTATGTCCAT |
| M00075 | V\$GATA1_01 | 9                  | 12436 | (+) | SNNGATNNNN     | CATGATTGA      |
| M00076 | V\$GATA2_01 | 0.80424<br>0.83030 | 12436 | (+) | NNNGATRNNN     | CATGATTGA      |
| M00077 | V\$GATA3_01 | 6<br>0.80157       | 12437 | (+) | NNGATARNG      | ATGATTGA       |
| M00075 | V\$GATA1_01 | 9<br>0.79152       | 12441 | (+) | SNNGATNNNN     | TTTGATTCTT     |
| M00127 | V\$GATA1_03 | 4<br>0.80063       | 12483 | (-) | RNSNNGATAANNGN | ATAATTATGCTCTT |
| M00076 | V\$GATA2_01 | 1<br>0.84106       | 12485 | (-) | NNNGATRNNN     | AATTATGCTC     |
| M00075 | V\$GATA1_01 | 6<br>0.81235       | 12512 | (+) | SNNGATNNNN     | GGAGATTTAT     |
| M00076 | V\$GATA2_01 | 9<br>0.83535       | 12512 | (+) | NNNGATRNNN     | GGAGATTTAT     |
| M00203 | V\$GATA_C   | 3<br>0.84437       | 12545 | (-) | NGATAAGNMNN    | AGAAACTATCT    |
| M00126 | V\$GATA1_02 | 5<br>0.84884       | 12546 | (-) | NNNNNGATANKGNN | GAAACTATCTGGAG |
| M00127 | V\$GATA1_03 | 9<br>0.85784       | 12546 | (-) | RNSNNGATAANNGN | GAAACTATCTGGAG |
| M00128 | V\$GATA1_04 | 3                  | 12546 | (-) | NNCWGATARNNNN  | GAAACTATCTGGA  |
| M00075 | V\$GATA1_01 | 0.94768            | 12548 | (-) | SNNGATNNNN     | AACTATCTGG     |

|        |             |                    |       |     |                |                |
|--------|-------------|--------------------|-------|-----|----------------|----------------|
| M00076 | V\$GATA2_01 | 0.94812<br>8       | 12548 | (-) | NNNGATRNNN     | AACTATCTGG     |
| M00077 | V\$GATA3_01 | 0.88923<br>3       | 12548 | (-) | NNGATARNG      | AACTATCTG      |
| M00126 | V\$GATA1_02 | 0.86156<br>3       | 12556 | (+) | NNNNNGATANKGNN | GGAGAGATAGTAAA |
| M00127 | V\$GATA1_03 | 0.87677<br>6       | 12556 | (+) | RNSNNGATAANNGN | GGAGAGATAGTAAA |
| M00128 | V\$GATA1_04 | 0.85661<br>8       | 12557 | (+) | NNCWGATARNNNN  | GAGAGATAGTAAA  |
| M00075 | V\$GATA1_01 | 0.85093<br>8       | 12558 | (+) | SNNGATNNNN     | AGAGATAGTA     |
| M00076 | V\$GATA2_01 | 0.87686<br>1       | 12558 | (+) | NNNGATRNNN     | AGAGATAGTA     |
| M00077 | V\$GATA3_01 | 0.94417<br>4       | 12559 | (+) | NNGATARNG      | GAGATAGTA      |
| M00203 | V\$GATA_C   | 0.85865<br>2       | 12560 | (+) | NGATAAGNMNN    | AGATAGTAAAT    |
| M00127 | V\$GATA1_03 | 0.78466<br>4       | 12588 | (-) | RNSNNGATAANNGN | TTTCTGATCTGTTT |
| M00128 | V\$GATA1_04 | 0.81617<br>6       | 12588 | (-) | NNCWGATARNNNN  | TTTCTGATCTGTT  |
| M00075 | V\$GATA1_01 | 0.82181<br>6       | 12590 | (+) | SNNGATNNNN     | TCTGATCTGT     |
| M00076 | V\$GATA2_01 | 0.83310<br>8       | 12590 | (+) | NNNGATRNNN     | TCTGATCTGT     |
| M00127 | V\$GATA1_03 | 0.78197<br>0.80355 | 12604 | (-) | RNSNNGATAANNGN | CCTCCATCTGTAT  |
| M00075 | V\$GATA1_01 | 4                  | 12606 | (-) | SNNGATNNNN     | TTCCATCTGT     |
| M00076 | V\$GATA2_01 | 0.8083<br>0.84758  | 12606 | (-) | NNNGATRNNN     | TTCCATCTGT     |
| M00077 | V\$GATA3_01 | 5                  | 12606 | (-) | NNGATARNG      | TTCCATCTG      |
| M00203 | V\$GATA_C   | 0.95588<br>7       | 12620 | (-) | NGATAAGNMNN    | TGTTTTATCT     |
| M00126 | V\$GATA1_02 | 0.82062<br>5       | 12621 | (-) | NNNNNGATANKGNN | GTTTTTATCTATAT |
| M00127 | V\$GATA1_03 | 0.88216<br>6       | 12621 | (-) | RNSNNGATAANNGN | GTTTTTATCTATAT |
| M00128 | V\$GATA1_04 | 0.87561<br>3       | 12621 | (-) | NNCWGATARNNNN  | GTTTTTATCTATA  |
| M00077 | V\$GATA3_01 | 0.85423<br>1       | 12623 | (-) | NNGATARNG      | TTTTATCTA      |
| M00127 | V\$GATA1_03 | 0.81430<br>7       | 12627 | (+) | RNSNNGATAANNGN | ATCTATATAATAGA |
| M00075 | V\$GATA1_01 | 0.84995<br>1       | 12642 | (+) | SNNGATNNNN     | ACTGATTCTT     |
| M00076 | V\$GATA2_01 | 0.80559<br>3       | 12642 | (+) | NNNGATRNNN     | ACTGATTCTT     |
| M00075 | V\$GATA1_01 | 0.80157<br>9       | 12695 | (+) | SNNGATNNNN     | TCTGATTCA      |
| M00076 | V\$GATA2_01 | 0.81596<br>8       | 12695 | (+) | NNNGATRNNN     | TCTGATTCA      |
| M00127 | V\$GATA1_03 | 0.83072<br>0.85656 | 12710 | (+) | RNSNNGATAANNGN | AAGGTGACAACCAG |
| M00126 | V\$GATA1_02 | 3                  | 12718 | (+) | NNNNNGATANKGNN | AACCAGATACTGTG |
| M00127 | V\$GATA1_03 | 0.84982<br>9       | 12718 | (+) | RNSNNGATAANNGN | AACCAGATACTGTG |
| M00128 | V\$GATA1_04 | 0.81556<br>4       | 12719 | (+) | NNCWGATARNNNN  | ACCAGATACTGTG  |
| M00075 | V\$GATA1_01 | 0.93336<br>6       | 12720 | (+) | SNNGATNNNN     | CCAGATACTG     |
| M00076 | V\$GATA2_01 | 0.93594<br>9       | 12720 | (+) | NNNGATRNNN     | CCAGATACTG     |

|        |             |                    |       |     |                |                 |
|--------|-------------|--------------------|-------|-----|----------------|-----------------|
| M00077 | V\$GATA3_01 | 0.87682<br>8       | 12721 | (+) | NNGATARNG      | CAGATACTG       |
| M00076 | V\$GATA2_01 | 0.80920<br>2       | 12732 | (-) | NNNGATRNNN     | AAATATGTGC      |
| M00075 | V\$GATA1_01 | 0.85834<br>2       | 12754 | (+) | SNNGATNNNN     | TCTGATTCTT      |
| M00076 | V\$GATA2_01 | 0.85701<br>4       | 12754 | (+) | NNNGATRNNN     | TCTGATTCTT      |
| M00203 | V\$GATA_C   | 0.90680<br>3       | 12757 | (-) | NGATAAGNMNN    | GATTCTATCA      |
| M00126 | V\$GATA1_02 | 0.83687<br>5       | 12758 | (-) | NNNNNGATANKGNN | ATTCCTATCAAAAAG |
| M00128 | V\$GATA1_04 | 0.88449<br>8       | 12758 | (-) | NNCWGATARNNNN  | ATTCCTATCAAAA   |
| M00075 | V\$GATA1_01 | 0.82773<br>9       | 12760 | (-) | SNNGATNNNN     | TCCTATCAAA      |
| M00076 | V\$GATA2_01 | 0.81461<br>4       | 12760 | (-) | NNNGATRNNN     | TCCTATCAAA      |
| M00077 | V\$GATA3_01 | 0.89986<br>7       | 12760 | (-) | NNGATARNG      | TCCTATCAA       |
| M00076 | V\$GATA2_01 | 0.86468<br>2       | 12770 | (-) | NNNGATRNNN     | AGCTATGCCA      |
| M00075 | V\$GATA1_01 | 0.80849            | 12782 | (-) | SNNGATNNNN     | TTCAATCACT      |
| M00077 | V\$GATA3_01 | 0.86708<br>0.85958 | 12782 | (-) | NNGATARNG      | TTCAATCAC       |
| M00203 | V\$GATA_C   | 4                  | 12849 | (-) | NGATAAGNMNN    | AAATATTATCT     |
| M00126 | V\$GATA1_02 | 0.87125<br>0.88216 | 12850 | (-) | NNNNNGATANKGNN | AATATTATCTAGAT  |
| M00127 | V\$GATA1_03 | 6<br>0.81525       | 12850 | (-) | RNSNNGATAANNGN | AATATTATCTAGAT  |
| M00128 | V\$GATA1_04 | 7<br>0.79022       | 12850 | (-) | NNCWGATARNNNN  | AATATTATCTAGA   |
| M00075 | V\$GATA1_01 | 7<br>0.87416       | 12852 | (-) | SNNGATNNNN     | TATTATCTAG      |
| M00077 | V\$GATA3_01 | 9<br>0.90187       | 12852 | (-) | NNGATARNG      | TATTATCTA       |
| M00126 | V\$GATA1_02 | 5<br>0.88216       | 12856 | (+) | NNNNNGATANKGNN | ATCTAGATAATGCA  |
| M00127 | V\$GATA1_03 | 6<br>0.84957       | 12856 | (+) | RNSNNGATAANNGN | ATCTAGATAATGCA  |
| M00128 | V\$GATA1_04 | 1<br>0.83711       | 12857 | (+) | NNCWGATARNNNN  | TCTAGATAATGCA   |
| M00075 | V\$GATA1_01 | 7<br>0.82002       | 12858 | (+) | SNNGATNNNN     | CTAGATAATG      |
| M00076 | V\$GATA2_01 | 7<br>0.90917       | 12858 | (+) | NNNGATRNNN     | CTAGATAATG      |
| M00077 | V\$GATA3_01 | 1<br>0.90711       | 12859 | (+) | NNGATARNG      | TAGATAATG       |
| M00203 | V\$GATA_C   | 4<br>0.84945       | 12860 | (+) | NGATAAGNMNN    | AGATAATGCAA     |
| M00075 | V\$GATA1_01 | 7<br>0.81194       | 12896 | (+) | SNNGATNNNN     | CCAGATCTCT      |
| M00075 | V\$GATA1_01 | 5<br>0.86603       | 12896 | (-) | SNNGATNNNN     | CCAGATCTCT      |
| M00076 | V\$GATA2_01 | 5<br>0.82498       | 12896 | (+) | NNNGATRNNN     | CCAGATCTCT      |
| M00076 | V\$GATA2_01 | 9<br>0.82410       | 12896 | (-) | NNNGATRNNN     | CCAGATCTCT      |
| M00077 | V\$GATA3_01 | 3<br>0.77196       | 12896 | (-) | NNGATARNG      | CCAGATCTC       |
| M00075 | V\$GATA1_01 | 4<br>0.87364       | 12902 | (-) | SNNGATNNNN     | CTCTAACATG      |
| M00075 | V\$GATA1_01 | 3                  | 12965 | (-) | SNNGATNNNN     | AAAGATCACC      |

|        |             |         |       |     |                |                |
|--------|-------------|---------|-------|-----|----------------|----------------|
|        |             | 0.79792 |       |     |                |                |
| M00076 | V\$GATA2_01 | 5       | 12965 | (+) | NNNGATRNNN     | AAAGATCACC     |
|        |             | 0.84122 |       |     |                |                |
| M00076 | V\$GATA2_01 | 7       | 12965 | (-) | NNNGATRNNN     | AAAGATCACC     |
|        |             | 0.77838 |       |     |                |                |
| M00075 | V\$GATA1_01 | 1       | 12992 | (-) | SNNGATNNNN     | CAGAAACAGC     |
|        |             | 0.81461 |       |     |                |                |
| M00076 | V\$GATA2_01 | 4       | 13000 | (-) | NNNGATRNNN     | GCCTATGATA     |
|        |             | 0.79437 |       |     |                |                |
| M00126 | V\$GATA1_02 | 5       | 13001 | (+) | NNNNNGATANKGNN | CCTATGATAGCAGT |
|        |             | 0.78515 |       |     |                |                |
| M00127 | V\$GATA1_03 | 4       | 13001 | (+) | RNSNNGATAANNGN | CCTATGATAGCAGT |
|        |             | 0.82812 |       |     |                |                |
| M00128 | V\$GATA1_04 | 5       | 13002 | (+) | NNCWGATARNNNN  | CTATGATAGCAGT  |
|        |             | 0.85143 |       |     |                |                |
| M00075 | V\$GATA1_01 | 1       | 13003 | (+) | SNNGATNNNN     | TATGATAGCA     |
|        |             | 0.90888 |       |     |                |                |
| M00076 | V\$GATA2_01 | 6       | 13003 | (+) | NNNGATRNNN     | TATGATAGCA     |
|        |             | 0.88746 |       |     |                |                |
| M00077 | V\$GATA3_01 | 1       | 13004 | (+) | NNGATARNG      | ATGATAGCA      |
|        |             | 0.86475 |       |     |                |                |
| M00075 | V\$GATA1_01 | 8       | 13013 | (-) | SNNGATNNNN     | GTGAATCAGG     |
|        |             | 0.80333 |       |     |                |                |
| M00076 | V\$GATA2_01 | 8       | 13013 | (-) | NNNGATRNNN     | GTGAATCAGG     |
|        |             | 0.83639 |       |     |                |                |
| M00128 | V\$GATA1_04 | 7       | 13017 | (+) | NNCWGATARNNNN  | ATCAGGTAAGTGT  |
|        |             | 0.85093 |       |     |                |                |
| M00126 | V\$GATA1_02 | 8       | 13061 | (-) | NNNNNGATANKGNN | CAAACATCTATTG  |
|        |             | 0.80034 |       |     |                |                |
| M00127 | V\$GATA1_03 | 3       | 13061 | (-) | RNSNNGATAANNGN | CAAACATCTATTG  |
|        |             | 0.82181 |       |     |                |                |
| M00075 | V\$GATA1_01 | 6       | 13063 | (-) | SNNGATNNNN     | AACTATCTAT     |
|        |             |         |       |     |                |                |
| M00076 | V\$GATA2_01 | 0.81687 | 13063 | (-) | NNNGATRNNN     | AACTATCTAT     |
|        |             | 0.87062 |       |     |                |                |
| M00077 | V\$GATA3_01 | 5       | 13063 | (-) | NNGATARNG      | AACTATCTA      |
|        |             | 0.84649 |       |     |                |                |
| M00075 | V\$GATA1_01 | 6       | 13107 | (-) | SNNGATNNNN     | TTACATCAGG     |
|        |             | 0.80198 |       |     |                |                |
| M00076 | V\$GATA2_01 | 5       | 13107 | (-) | NNNGATRNNN     | TTACATCAGG     |
|        |             | 0.78664 |       |     |                |                |
| M00076 | V\$GATA2_01 | 9       | 13180 | (+) | NNNGATRNNN     | CAACATTGCT     |
|        |             | 0.80947 |       |     |                |                |
| M00075 | V\$GATA1_01 | 7       | 13193 | (-) | SNNGATNNNN     | AAAGATCAGA     |
|        |             | 0.82679 |       |     |                |                |
| M00076 | V\$GATA2_01 | 3       | 13193 | (-) | NNNGATRNNN     | AAAGATCAGA     |
|        |             | 0.86722 |       |     |                |                |
| M00075 | V\$GATA1_01 | 6       | 13239 | (-) | SNNGATNNNN     | GGCCATCCCT     |
|        |             | 0.90798 |       |     |                |                |
| M00076 | V\$GATA2_01 | 4       | 13239 | (-) | NNNGATRNNN     | GGCCATCCCT     |
|        |             | 0.79201 |       |     |                |                |
| M00127 | V\$GATA1_03 | 4       | 13251 | (+) | RNSNNGATAANNGN | ATGAAGAGAGCTTC |
|        |             | 0.88195 |       |     |                |                |
| M00203 | V\$GATA_C   | 1       | 13300 | (-) | NGATAAGNMNN    | TATTCATATCA    |
|        |             | 0.79406 |       |     |                |                |
| M00126 | V\$GATA1_02 | 3       | 13301 | (-) | NNNNNGATANKGNN | ATTCATATCATTCA |
|        |             | 0.87193 |       |     |                |                |
| M00128 | V\$GATA1_04 | 6       | 13301 | (-) | NNCWGATARNNNN  | ATTCATATCATTC  |
|        |             |         |       |     |                |                |
| M00075 | V\$GATA1_01 | 0.80849 | 13303 | (-) | SNNGATNNNN     | TCATATCATT     |
|        |             | 0.82724 |       |     |                |                |
| M00076 | V\$GATA2_01 | 4       | 13303 | (-) | NNNGATRNNN     | TCATATCATT     |
|        |             | 0.86397 |       |     |                |                |
| M00077 | V\$GATA3_01 | 9       | 13303 | (-) | NNGATARNG      | TCATATCAT      |
|        |             |         |       |     |                |                |
| M00076 | V\$GATA2_01 | 0.79161 | 13374 | (-) | NNNGATRNNN     | TCTAATCTTA     |

|        |             |                    |       |     |                |                |
|--------|-------------|--------------------|-------|-----|----------------|----------------|
| M00077 | V\$GATA3_01 | 0.88568<br>9       | 13374 | (-) | NNGATARNG      | TCTAATCTT      |
| M00127 | V\$GATA1_03 | 0.78270<br>5       | 13377 | (-) | RNSNNGATAANNGN | AATCTTATGACCTT |
| M00203 | V\$GATA_C   | 0.84032<br>3       | 13401 | (-) | NGATAAGNMNN    | TGTTCTTCTCT    |
| M00203 | V\$GATA_C   | 0.83877<br>0.81371 | 13474 | (-) | NGATAAGNMNN    | CTCACATATCT    |
| M00076 | V\$GATA2_01 | 2<br>0.84593       | 13475 | (+) | NNNGATRNNN     | TCACATATCT     |
| M00126 | V\$GATA1_02 | 8<br>0.80499       | 13475 | (-) | NNNNNGATANKGNN | TCACATATCTTGAG |
| M00127 | V\$GATA1_03 | 8<br>0.86519       | 13475 | (-) | RNSNNGATAANNGN | TCACATATCTTGAG |
| M00128 | V\$GATA1_04 | 6<br>0.89239       | 13475 | (-) | NNCWGATARNNNN  | TCACATATCTTGA  |
| M00075 | V\$GATA1_01 | 9<br>0.90978       | 13477 | (-) | SNNGATNNNN     | ACATATCTTG     |
| M00076 | V\$GATA2_01 | 8                  | 13477 | (-) | NNNGATRNNN     | ACATATCTTG     |
| M00077 | V\$GATA3_01 | 0.85556<br>0.83488 | 13477 | (-) | NNGATARNG      | ACATATCTT      |
| M00127 | V\$GATA1_03 | 5<br>0.84254       | 13521 | (+) | RNSNNGATAANNGN | AAGGTGGTAACTGC |
| M00075 | V\$GATA1_01 | 7<br>0.78258       | 13558 | (+) | SNNGATNNNN     | ATTGATGGTT     |
| M00076 | V\$GATA2_01 | 9<br>0.79812       | 13579 | (-) | NNNGATRNNN     | TAGTATGCTA     |
| M00075 | V\$GATA1_01 | 4<br>0.80920       | 13635 | (-) | SNNGATNNNN     | ATGAATCTGA     |
| M00076 | V\$GATA2_01 | 2                  | 13635 | (-) | NNNGATRNNN     | ATGAATCTGA     |
| M00126 | V\$GATA1_02 | 0.8825<br>0.84149  | 13638 | (+) | NNNNNGATANKGNN | AATCTGATAAGGGA |
| M00127 | V\$GATA1_03 | 9                  | 13638 | (+) | RNSNNGATAANNGN | AATCTGATAAGGGA |
| M00128 | V\$GATA1_04 | 0.97549<br>0.86623 | 13639 | (+) | NNCWGATARNNNN  | ATCTGATAAGGGA  |
| M00075 | V\$GATA1_01 | 9<br>0.89580       | 13640 | (+) | SNNGATNNNN     | TCTGATAAGG     |
| M00076 | V\$GATA2_01 | 5<br>0.92512       | 13640 | (+) | NNNGATRNNN     | TCTGATAAGG     |
| M00077 | V\$GATA3_01 | 2<br>0.94283       | 13641 | (+) | NNGATARNG      | CTGATAAGG      |
| M00203 | V\$GATA_C   | 9<br>0.80256       | 13642 | (+) | NGATAAGNMNN    | TGATAAGGGAT    |
| M00075 | V\$GATA1_01 | 7<br>0.78033       | 13657 | (+) | SNNGATNNNN     | CAAGATTCAA     |
| M00076 | V\$GATA2_01 | 4<br>0.77739       | 13657 | (+) | NNNGATRNNN     | CAAGATTCAA     |
| M00075 | V\$GATA1_01 | 4<br>0.77936       | 13675 | (-) | SNNGATNNNN     | AGTCATCAAT     |
| M00075 | V\$GATA1_01 | 8<br>0.81843       | 13679 | (-) | SNNGATNNNN     | ATCAATCAAT     |
| M00126 | V\$GATA1_02 | 8<br>0.87898       | 13689 | (+) | NNNNNGATANKGNN | TTTATGATAATCAT |
| M00128 | V\$GATA1_04 | 3<br>0.80700       | 13690 | (+) | NNCWGATARNNNN  | TTATGATAATCAT  |
| M00075 | V\$GATA1_01 | 9<br>0.86468       | 13691 | (+) | SNNGATNNNN     | TATGATAATC     |
| M00076 | V\$GATA2_01 | 2<br>0.84315       | 13691 | (+) | NNNGATRNNN     | TATGATAATC     |
| M00077 | V\$GATA3_01 | 5<br>0.78417       | 13692 | (+) | NNGATARNG      | ATGATAATC      |
| M00127 | V\$GATA1_03 | 4                  | 13692 | (-) | RNSNNGATAANNGN | ATGATAATCATTCC |

|        |             |         |       |                |                |                |
|--------|-------------|---------|-------|----------------|----------------|----------------|
|        |             | 0.87791 |       |                |                |                |
| M00203 | V\$GATA_C   | 2       | 13693 | (+)            | NGATAAGNMNN    | TGATAATCATT    |
|        |             | 0.77492 |       |                |                |                |
| M00075 | V\$GATA1_01 | 6       | 13694 | (-)            | SNNGATNNNN     | GATAATCATT     |
|        |             | 0.78331 |       |                |                |                |
| M00075 | V\$GATA1_01 | 7       | 13711 | (-)            | SNNGATNNNN     | GTGAATCATA     |
|        |             | 0.78619 |       |                |                |                |
| M00076 | V\$GATA2_01 | 8       | 13711 | (-)            | NNNGATRNNN     | GTGAATCATA     |
|        |             | 0.77062 |       |                |                |                |
| M00126 | V\$GATA1_02 | 5       | 13775 | (+)            | NNNNNGATANKGNN | GAAAAGAAAAGACA |
|        |             | 0.83131 |       |                |                |                |
| M00203 | V\$GATA_C   | 4       | 13779 | (+)            | NGATAAGNMNN    | AGAAAAGACAA    |
|        |             | 0.86906 |       |                |                |                |
| M00126 | V\$GATA1_02 | 2       | 13817 | (-)            | NNNNNGATANKGNN | TACACTATCCTCAC |
|        |             | 0.86501 |       |                |                |                |
| M00127 | V\$GATA1_03 | 7       | 13817 | (-)            | RNSNNGATAANNGN | TACACTATCCTCAC |
|        |             | 0.92941 |       |                |                |                |
| M00075 | V\$GATA1_01 | 8       | 13819 | (-)            | SNNGATNNNN     | CACTATCCTC     |
|        |             | 0.97293 |       |                |                |                |
| M00076 | V\$GATA2_01 | 6       | 13819 | (-)            | NNNGATRNNN     | CACTATCCTC     |
|        |             | 0.91670 |       |                |                |                |
| M00077 | V\$GATA3_01 | 4       | 13819 | (-)            | NNGATARNG      | CACTATCCT      |
|        |             | 0.80769 |       |                |                |                |
| M00127 | V\$GATA1_03 | 2       | 13852 | (+)            | RNSNNGATAANNGN | AAGAGGGTAATCAT |
|        |             | 0.78270 |       |                |                |                |
| M00127 | V\$GATA1_03 | 5       | 13855 | (-)            | RNSNNGATAANNGN | AGGGTAATCATTCT |
|        |             | 0.77492 |       |                |                |                |
| M00075 | V\$GATA1_01 | 6       | 13857 | (-)            | SNNGATNNNN     | GGTAATCATT     |
|        |             | 0.78664 |       |                |                |                |
| M00076 | V\$GATA2_01 | 9       | 13857 | (-)            | NNNGATRNNN     | GGTAATCATT     |
|        |             | 0.79161 |       |                |                |                |
| M00076 | V\$GATA2_01 | 13866   | (-)   | NNNGATRNNN     | TCTAATCTTA     |                |
|        |             | 0.88568 |       |                |                |                |
| M00077 | V\$GATA3_01 | 9       | 13866 | (-)            | NNGATARNG      | TCTAATCTT      |
|        |             | 0.79617 |       |                |                |                |
| M00127 | V\$GATA1_03 | 8       | 13913 | (-)            | RNSNNGATAANNGN | GCATTTAACTGGGT |
|        |             | 0.79121 |       |                |                |                |
| M00075 | V\$GATA1_01 | 4       | 13927 | (-)            | SNNGATNNNN     | TTGAATCACA     |
|        |             | 0.84093 |       |                |                |                |
| M00077 | V\$GATA3_01 | 9       | 13949 | (-)            | NNGATARNG      | TCCTCTCTC      |
|        |             | 0.78246 |       |                |                |                |
| M00127 | V\$GATA1_03 | 13949   | (-)   | RNSNNGATAANNGN | TCCTCTCTCTCCTT |                |
|        |             | 0.83517 |       |                |                |                |
| M00077 | V\$GATA3_01 | 9       | 13951 | (-)            | NNGATARNG      | CTCTCTCTC      |
|        |             | 0.78035 |       |                |                |                |
| M00075 | V\$GATA1_01 | 5       | 14000 | (+)            | SNNGATNNNN     | TTTGATTTTT     |
|        |             | 0.81136 |       |                |                |                |
| M00127 | V\$GATA1_03 | 7       | 14017 | (+)            | RNSNNGATAANNGN | ATACTAATAAGAGA |
|        |             | 0.80947 |       |                |                |                |
| M00075 | V\$GATA1_01 | 7       | 14029 | (-)            | SNNGATNNNN     | GAAAATCTCA     |
|        |             | 0.83446 |       |                |                |                |
| M00076 | V\$GATA2_01 | 1       | 14029 | (-)            | NNNGATRNNN     | GAAAATCTCA     |
|        |             | 0.80454 |       |                |                |                |
| M00075 | V\$GATA1_01 | 1       | 14036 | (+)            | SNNGATNNNN     | TCAGATATCA     |
|        |             | 0.89174 |       |                |                |                |
| M00076 | V\$GATA2_01 | 6       | 14036 | (+)            | NNNGATRNNN     | TCAGATATCA     |
|        |             | 0.84558 |       |                |                |                |
| M00128 | V\$GATA1_04 | 8       | 14036 | (-)            | NNCWGATARNNNN  | TCAGATATCATAT  |
|        |             | 0.84492 |       |                |                |                |
| M00077 | V\$GATA3_01 | 7       | 14037 | (+)            | NNGATARNG      | CAGATATCA      |
|        |             | 0.84007 |       |                |                |                |
| M00075 | V\$GATA1_01 | 9       | 14038 | (-)            | SNNGATNNNN     | AGATATCATA     |
|        |             | 0.90212 |       |                |                |                |
| M00076 | V\$GATA2_01 | 14038   | (-)   | NNNGATRNNN     | AGATATCATA     |                |
|        |             | 0.80083 |       |                |                |                |
| M00127 | V\$GATA1_03 | 3       | 14048 | (-)            | RNSNNGATAANNGN | TTTATTATAATCGT |



|        |             |              |       |     |                |                 |
|--------|-------------|--------------|-------|-----|----------------|-----------------|
| M00077 | V\$GATA3_01 | 0.83517<br>9 | 14053 | (-) | NNGATARNG      | TATAATCGT       |
| M00126 | V\$GATA1_02 | 0.80781<br>3 | 14060 | (+) | NNNNNGATANKGNN | GTTAGGATAGGCAA  |
| M00127 | V\$GATA1_03 | 0.80401<br>8 | 14060 | (+) | RNSNNGATAANNGN | GTTAGGATAGGCAA  |
| M00128 | V\$GATA1_04 | 0.83455<br>9 | 14061 | (+) | NNCWGATARNNNN  | TTAGGATAGGCAA   |
| M00075 | V\$GATA1_01 | 0.85932<br>9 | 14062 | (+) | SNNGATNNNN     | TAGGATAGGC      |
| M00076 | V\$GATA2_01 | 0.94812<br>8 | 14062 | (+) | NNNGATRNNN     | TAGGATAGGC      |
| M00077 | V\$GATA3_01 | 0.87062<br>5 | 14063 | (+) | NNGATARNG      | AGGATAGGC       |
| M00203 | V\$GATA_C   | 0.89748<br>4 | 14064 | (+) | NGATAAGNMNN    | GGATAGGCAAC     |
| M00075 | V\$GATA1_01 | 0.77591<br>3 | 14113 | (-) | SNNGATNNNN     | TTCCATCAAA      |
| M00127 | V\$GATA1_03 | 0.78564<br>4 | 14128 | (-) | RNSNNGATAANNGN | TATATTTCCACCT   |
| M00127 | V\$GATA1_03 | 0.78931<br>9 | 14172 | (+) | RNSNNGATAANNGN | AAACAAATAAAAAGG |
| M00128 | V\$GATA1_04 | 0.81096<br>8 | 14173 | (+) | NNCWGATARNNNN  | AACAAATAAAAAGG  |
| M00076 | V\$GATA2_01 | 0.79882<br>7 | 14184 | (-) | NNNGATRNNN     | GGCCATGATA      |
| M00126 | V\$GATA1_02 | 0.81718<br>7 | 14185 | (+) | NNNNNGATANKGNN | GCCATGATAGATTA  |
| M00127 | V\$GATA1_03 | 0.79789<br>3 | 14185 | (+) | RNSNNGATAANNGN | GCCATGATAGATTA  |
| M00075 | V\$GATA1_01 | 0.90819<br>3 | 14187 | (+) | SNNGATNNNN     | CATGATAGAT      |
| M00076 | V\$GATA2_01 | 0.88858<br>8 | 14187 | (+) | NNNGATRNNN     | CATGATAGAT      |
| M00077 | V\$GATA3_01 | 0.85157<br>3 | 14188 | (+) | NNGATARNG      | ATGATAGAT       |
| M00203 | V\$GATA_C   | 0.85088<br>5 | 14189 | (+) | NGATAAGNMNN    | TGATAGATTAA     |
| M00128 | V\$GATA1_04 | 0.81617<br>6 | 14221 | (+) | NNCWGATARNNNN  | TTCAGAAAAGAAA   |
| M00203 | V\$GATA_C   | 0.83224<br>6 | 14224 | (+) | NGATAAGNMNN    | AGAAAAGAAAT     |
| M00126 | V\$GATA1_02 | 0.78531<br>3 | 14227 | (+) | NNNNNGATANKGNN | AAAGAAATAATGGT  |
| M00127 | V\$GATA1_03 | 0.79813<br>8 | 14227 | (+) | RNSNNGATAANNGN | AAAGAAATAATGGT  |
| M00126 | V\$GATA1_02 | 0.79125<br>4 | 14251 | (-) | NNNNNGATANKGNN | AACCTTATAGTTAC  |
| M00127 | V\$GATA1_03 | 0.78466<br>4 | 14293 | (-) | RNSNNGATAANNGN | ATTCTTTTCTCTTT  |
| M00127 | V\$GATA1_03 | 0.78931<br>9 | 14295 | (-) | RNSNNGATAANNGN | TCTTTTCTCTTTAT  |
| M00075 | V\$GATA1_01 | 0.77591<br>3 | 14321 | (-) | SNNGATNNNN     | TGAAATCCCT      |
| M00076 | V\$GATA2_01 | 0.80920<br>2 | 14321 | (-) | NNNGATRNNN     | TGAAATCCCT      |
| M00126 | V\$GATA1_02 | 0.78187<br>5 | 14353 | (-) | NNNNNGATANKGNN | TTCCCTTTCTTTGA  |
| M00077 | V\$GATA3_01 | 0.82321<br>7 | 14355 | (-) | NNGATARNG      | CCCTTTCTT       |
| M00076 | V\$GATA2_01 | 0.78529<br>5 | 14367 | (+) | NNNGATRNNN     | GCTCATTGCC      |
| M00127 | V\$GATA1_03 | 0.80867<br>2 | 14491 | (+) | RNSNNGATAANNGN | ACTTTGATAGCTGG  |
| M00075 | V\$GATA1_01 | 0.85093<br>8 | 14493 | (+) | SNNGATNNNN     | TTTGATAGCT      |

|        |             |         |       |     |                 |                |
|--------|-------------|---------|-------|-----|-----------------|----------------|
|        |             | 0.85701 |       |     |                 |                |
| M00076 | V\$GATA2_01 | 4       | 14493 | (+) | NNNGATRNNN      | TTTGATAGCT     |
|        |             | 0.83119 |       |     |                 |                |
| M00077 | V\$GATA3_01 | 2       | 14494 | (+) | NNGATARNG       | TTGATAGCT      |
|        |             | 0.79713 |       |     |                 |                |
| M00075 | V\$GATA1_01 | 7       | 14561 | (+) | SNNGATNNNN      | AGTGATTAT      |
|        |             | 0.80799 |       |     |                 |                |
| M00075 | V\$GATA1_01 | 6       | 14576 | (-) | SNNGATNNNN      | ACCCCTCAGG     |
|        |             | 0.78282 |       |     |                 |                |
| M00075 | V\$GATA1_01 | 3       | 14595 | (-) | SNNGATNNNN      | AAAAATCCTT     |
|        |             | 0.81190 |       |     |                 |                |
| M00076 | V\$GATA2_01 | 8       | 14595 | (-) | NNNGATRNNN      | AAAAATCCTT     |
|        |             | 0.79072 |       |     |                 |                |
| M00075 | V\$GATA1_01 | 1       | 14621 | (+) | SNNGATNNNN      | TGTGATTAC      |
|        |             |         |       |     |                 |                |
| M00076 | V\$GATA2_01 | 0.78304 | 14621 | (+) | NNNGATRNNN      | TGTGATTAC      |
|        |             | 0.83942 |       |     |                 |                |
| M00076 | V\$GATA2_01 | 3       | 14628 | (+) | NNNGATRNNN      | TACCATAGGG     |
|        |             | 0.82753 |       |     |                 |                |
| M00127 | V\$GATA1_03 | 6       | 14652 | (-) | RNSNNGATAANNNGN | TCTGTTTTCTCAC  |
|        |             | 0.83958 |       |     |                 |                |
| M00075 | V\$GATA1_01 | 5       | 14671 | (-) | SNNGATNNNN      | AAACATCTCT     |
|        |             | 0.84167 |       |     |                 |                |
| M00076 | V\$GATA2_01 | 8       | 14671 | (-) | NNNGATRNNN      | AAACATCTCT     |
|        |             | 0.86673 |       |     |                 |                |
| M00075 | V\$GATA1_01 | 2       | 14681 | (+) | SNNGATNNNN      | TGTGATGCGA     |
|        |             | 0.85069 |       |     |                 |                |
| M00076 | V\$GATA2_01 | 9       | 14681 | (+) | NNNGATRNNN      | TGTGATGCGA     |
|        |             | 0.80720 |       |     |                 |                |
| M00127 | V\$GATA1_03 | 2       | 14685 | (+) | RNSNNGATAANNNGN | ATGCGAATAGCCAT |
|        |             | 0.78935 |       |     |                 |                |
| M00076 | V\$GATA2_01 | 5       | 14693 | (-) | NNNGATRNNN      | AGCCATGTCT     |
|        |             | 0.78973 |       |     |                 |                |
| M00075 | V\$GATA1_01 | 3       | 14714 | (+) | SNNGATNNNN      | AATGATTCAT     |
|        |             | 0.82872 |       |     |                 |                |
| M00075 | V\$GATA1_01 | 7       | 14739 | (+) | SNNGATNNNN      | ACTGATTCT      |
|        |             | 0.81326 |       |     |                 |                |
| M00076 | V\$GATA2_01 | 1       | 14739 | (+) | NNNGATRNNN      | ACTGATTCT      |
|        |             | 0.86766 |       |     |                 |                |
| M00203 | V\$GATA_C   | 1       | 14810 | (-) | NGATAAGNMNN     | GACGCCTATCC    |
|        |             | 0.83062 |       |     |                 |                |
| M00126 | V\$GATA1_02 | 5       | 14811 | (-) | NNNNNGATANKGNN  | ACGCCTATCCATCT |
|        |             | 0.90151 |       |     |                 |                |
| M00127 | V\$GATA1_03 | 9       | 14811 | (-) | RNSNNGATAANNNGN | ACGCCTATCCATCT |
|        |             | 0.81490 |       |     |                 |                |
| M00075 | V\$GATA1_01 | 6       | 14813 | (-) | SNNGATNNNN      | GCCTATCCAT     |
|        |             |         |       |     |                 |                |
| M00076 | V\$GATA2_01 | 0.83401 | 14813 | (-) | NNNGATRNNN      | GCCTATCCAT     |
|        |             | 0.84625 |       |     |                 |                |
| M00077 | V\$GATA3_01 | 6       | 14813 | (-) | NNGATARNG       | GCCTATCCA      |
|        |             | 0.90819 |       |     |                 |                |
| M00075 | V\$GATA1_01 | 3       | 14817 | (-) | SNNGATNNNN      | ATCCATCTGG     |
|        |             | 0.87956 |       |     |                 |                |
| M00076 | V\$GATA2_01 | 7       | 14817 | (-) | NNNGATRNNN      | ATCCATCTGG     |
|        |             | 0.79568 |       |     |                 |                |
| M00127 | V\$GATA1_03 | 8       | 14829 | (-) | RNSNNGATAANNNGN | CCTGGTATTACCTT |
|        |             | 0.85883 |       |     |                 |                |
| M00075 | V\$GATA1_01 | 5       | 14861 | (+) | SNNGATNNNN      | ACTGATGCCC     |
|        |             | 0.85701 |       |     |                 |                |
| M00076 | V\$GATA2_01 | 4       | 14861 | (+) | NNNGATRNNN      | ACTGATGCCC     |
|        |             | 0.79960 |       |     |                 |                |
| M00075 | V\$GATA1_01 | 5       | 14881 | (-) | SNNGATNNNN      | TGACATCCCT     |
|        |             | 0.84528 |       |     |                 |                |
| M00076 | V\$GATA2_01 | 6       | 14881 | (-) | NNNGATRNNN      | TGACATCCCT     |
|        |             | 0.82527 |       |     |                 |                |
| M00075 | V\$GATA1_01 | 1       | 14888 | (-) | SNNGATNNNN      | CCTAATCCCA     |

|        |             |                    |       |     |                |                |
|--------|-------------|--------------------|-------|-----|----------------|----------------|
| M00076 | V\$GATA2_01 | 0.85701<br>4       | 14888 | (-) | NNNGATRNNN     | CCTAATCCCA     |
| M00077 | V\$GATA3_01 | 0.89277<br>8       | 14888 | (-) | NNGATARNG      | CCTAATCCC      |
| M00076 | V\$GATA2_01 | 0.81596<br>8       | 14923 | (-) | NNNGATRNNN     | TACTATGCCA     |
| M00127 | V\$GATA1_03 | 0.78907<br>4       | 14935 | (+) | RNSNNGATAANNGN | GTGGTGGTAAGTTC |
| M00203 | V\$GATA_C   | 0.87667<br>0.86937 | 14969 | (-) | NGATAAGNMNN    | CTGCCGTATCA    |
| M00126 | V\$GATA1_02 | 0.78172<br>5       | 14970 | (-) | NNNNNGATANKGNN | TGCCGTATCAAGGG |
| M00127 | V\$GATA1_03 | 0.90967<br>5       | 14970 | (-) | RNSNNGATAANNGN | TGCCGTATCAAGGG |
| M00075 | V\$GATA1_01 | 0.84122<br>4       | 14972 | (-) | SNNGATNNNN     | CCGTATCAAG     |
| M00076 | V\$GATA2_01 | 7                  | 14972 | (-) | NNNGATRNNN     | CCGTATCAAG     |
| M00077 | V\$GATA3_01 | 0.85556<br>0.80842 | 14972 | (-) | NNGATARNG      | CCGTATCAA      |
| M00127 | V\$GATA1_03 | 0.81416<br>7       | 14980 | (+) | RNSNNGATAANNGN | AGGGAAATAGAAGA |
| M00076 | V\$GATA2_01 | 0.79593<br>3       | 15047 | (-) | NNNGATRNNN     | TCCTATGCTA     |
| M00126 | V\$GATA1_02 | 0.80303<br>8       | 15077 | (+) | NNNNNGATANKGNN | TTGATGATAACTTT |
| M00127 | V\$GATA1_03 | 0.85416<br>8       | 15077 | (+) | RNSNNGATAANNGN | TTGATGATAACTTT |
| M00128 | V\$GATA1_04 | 0.87808<br>7       | 15078 | (+) | NNCWGATARNNNN  | TGATGATAACTTT  |
| M00075 | V\$GATA1_01 | 0.90166<br>5       | 15079 | (+) | SNNGATNNNN     | GATGATAACT     |
| M00076 | V\$GATA2_01 | 0.82720<br>9       | 15079 | (+) | NNNGATRNNN     | GATGATAACT     |
| M00077 | V\$GATA3_01 | 4                  | 15080 | (+) | NNGATARNG      | ATGATAACT      |
| M00203 | V\$GATA_C   | 0.83908<br>0.88357 | 15081 | (+) | NGATAAGNMNN    | TGATAACTTTC    |
| M00128 | V\$GATA1_04 | 0.82132<br>8       | 15089 | (+) | NNCWGATARNNNN  | TTCTGATATATGG  |
| M00075 | V\$GATA1_01 | 3                  | 15090 | (+) | SNNGATNNNN     | TCTGATATAT     |
| M00076 | V\$GATA2_01 | 0.85115<br>0.79206 | 15090 | (+) | NNNGATRNNN     | TCTGATATAT     |
| M00076 | V\$GATA2_01 | 0.83218<br>1       | 15124 | (+) | NNNGATRNNN     | GAACATGTGG     |
| M00126 | V\$GATA1_02 | 8                  | 15137 | (-) | NNNNNGATANKGNN | AGTGCTATCTATTT |
| M00127 | V\$GATA1_03 | 0.83317<br>0.85600 | 15137 | (-) | RNSNNGATAANNGN | AGTGCTATCTATTT |
| M00128 | V\$GATA1_04 | 0.78627<br>5       | 15137 | (-) | NNCWGATARNNNN  | AGTGCTATCTATT  |
| M00075 | V\$GATA1_01 | 0.80604<br>8       | 15139 | (-) | SNNGATNNNN     | TGCTATCTAT     |
| M00076 | V\$GATA2_01 | 0.88657<br>4       | 15139 | (-) | NNNGATRNNN     | TGCTATCTAT     |
| M00077 | V\$GATA3_01 | 5                  | 15139 | (-) | NNGATARNG      | TGCTATCTA      |
| M00126 | V\$GATA1_02 | 0.85875<br>0.89705 | 15146 | (+) | NNNNNGATANKGNN | TATTTGATAAGTGA |
| M00128 | V\$GATA1_04 | 0.79812<br>9       | 15147 | (+) | NNCWGATARNNNN  | ATTTGATAAGTGA  |
| M00075 | V\$GATA1_01 | 0.79296<br>4       | 15148 | (+) | SNNGATNNNN     | TTTGATAAGT     |
| M00076 | V\$GATA2_01 | 3                  | 15148 | (+) | NNNGATRNNN     | TTTGATAAGT     |
| M00077 | V\$GATA3_01 | 0.83961            | 15149 | (+) | NNGATARNG      | TTGATAAGT      |

|        |             |              |       |     |                |                |
|--------|-------------|--------------|-------|-----|----------------|----------------|
| M00203 | V\$GATA_C   | 0.93755<br>8 | 15150 | (+) | NGATAAGNMNN    | TGATAAGTGAT    |
| M00126 | V\$GATA1_02 | 0.84531<br>3 | 15153 | (+) | NNNNNGATANKGN  | TAAGTGATAATCAT |
| M00127 | V\$GATA1_03 | 0.78833<br>9 | 15153 | (+) | RNSNNGATAANNGN | TAAGTGATAATCAT |
| M00128 | V\$GATA1_04 | 0.87316<br>2 | 15154 | (+) | NNCWGATARNNNN  | AAGTGATAATCAT  |
| M00075 | V\$GATA1_01 | 0.82724<br>6 | 15155 | (+) | SNNGATNNNN     | AGTGATAATC     |
| M00076 | V\$GATA2_01 | 0.84032<br>5 | 15155 | (+) | NNNGATRNNN     | AGTGATAATC     |
| M00077 | V\$GATA3_01 | 0.86043<br>4 | 15156 | (+) | NNGATARNG      | GTGATAATC      |
| M00127 | V\$GATA1_03 | 0.81700<br>1 | 15156 | (-) | RNSNNGATAANNGN | GTGATAATCATTCT |
| M00203 | V\$GATA_C   | 0.87791<br>2 | 15157 | (+) | NGATAAGNMNN    | TGATAATCATT    |
| M00075 | V\$GATA1_01 | 0.77492<br>6 | 15158 | (-) | SNNGATNNNN     | GATAATCATT     |
| M00127 | V\$GATA1_03 | 0.82067<br>6 | 15168 | (+) | RNSNNGATAANNGN | CTGATGAAAATAGG |
| M00127 | V\$GATA1_03 | 0.84664<br>4 | 15171 | (+) | RNSNNGATAANNGN | ATGAAAATAGGAGG |
| M00127 | V\$GATA1_03 | 0.79250<br>4 | 15179 | (+) | RNSNNGATAANNGN | AGGAGGAAAATTTT |
| M00203 | V\$GATA_C   | 0.86144<br>8 | 15211 | (-) | NGATAAGNMNN    | CAACTTTATCC    |
| M00127 | V\$GATA1_03 | 0.89000<br>5 | 15212 | (-) | RNSNNGATAANNGN | AACTTTATCCTCCT |
| M00128 | V\$GATA1_04 | 0.82046<br>6 | 15212 | (-) | NNCWGATARNNNN  | AACTTTATCCTCC  |
| M00075 | V\$GATA1_01 | 0.82477<br>8 | 15214 | (-) | SNNGATNNNN     | CTTTATCCTC     |
| M00076 | V\$GATA2_01 | 0.88137<br>1 | 15214 | (-) | NNNGATRNNN     | CTTTATCCTC     |
| M00077 | V\$GATA3_01 | 0.86840<br>9 | 15214 | (-) | NNGATARNG      | CTTTATCCT      |
| M00076 | V\$GATA2_01 | 0.78529<br>5 | 15235 | (-) | NNNGATRNNN     | GCTAATCTTT     |
| M00077 | V\$GATA3_01 | 0.85378<br>8 | 15235 | (-) | NNGATARNG      | GCTAATCTT      |
| M00127 | V\$GATA1_03 | 0.79887<br>3 | 15258 | (-) | RNSNNGATAANNGN | TGGATTATACCCAT |
| M00076 | V\$GATA2_01 | 0.78980<br>6 | 15266 | (-) | NNNGATRNNN     | ACCCATGATA     |
| M00075 | V\$GATA1_01 | 0.84649<br>6 | 15269 | (+) | SNNGATNNNN     | CATGATATAC     |
| M00076 | V\$GATA2_01 | 0.84844<br>4 | 15269 | (+) | NNNGATRNNN     | CATGATATAC     |
| M00203 | V\$GATA_C   | 0.85212<br>8 | 15271 | (+) | NGATAAGNMNN    | TGATATACATT    |
| M00127 | V\$GATA1_03 | 0.81332<br>7 | 15293 | (+) | RNSNNGATAANNGN | TGGGGGATAAACTG |
| M00075 | V\$GATA1_01 | 0.82724<br>6 | 15295 | (+) | SNNGATNNNN     | GGGGATAAAC     |
| M00076 | V\$GATA2_01 | 0.87280<br>1 | 15295 | (+) | NNNGATRNNN     | GGGGATAAAC     |
| M00075 | V\$GATA1_01 | 0.88400<br>8 | 15306 | (+) | SNNGATNNNN     | GCAGATTTTG     |
| M00076 | V\$GATA2_01 | 0.86558<br>4 | 15306 | (+) | NNNGATRNNN     | GCAGATTTTG     |
| M00077 | V\$GATA3_01 | 0.86220<br>6 | 15307 | (+) | NNGATARNG      | CAGATTTTG      |
| M00126 | V\$GATA1_02 | 0.77812<br>5 | 15326 | (-) | NNNNNGATANKGN  | AGTCCTAACTTGAA |

|        |             |         |       |     |                |                |
|--------|-------------|---------|-------|-----|----------------|----------------|
|        |             | 0.81638 |       |     |                |                |
| M00075 | V\$GATA1_01 | 7       | 15336 | (-) | SNNGATNNNN     | TGAAATCCTG     |
| M00076 | V\$GATA2_01 | 0.84258 | 15336 | (-) | NNNGATRNNN     | TGAAATCCTG     |
|        |             | 0.83473 |       |     |                |                |
| M00203 | V\$GATA_C   | 1       | 15339 | (-) | NGATAAGNMNN    | AATCCTGATCT    |
|        |             | 0.78466 |       |     |                |                |
| M00127 | V\$GATA1_03 | 4       | 15340 | (-) | RNSNNGATAANNGN | ATCCTGATCTTTTT |
|        |             | 0.81556 |       |     |                |                |
| M00128 | V\$GATA1_04 | 4       | 15340 | (-) | NNCWGATARNNNN  | ATCCTGATCTTTT  |
|        |             | 0.87018 |       |     |                |                |
| M00075 | V\$GATA1_01 | 8       | 15342 | (+) | SNNGATNNNN     | CCTGATCTTT     |
|        |             | 0.83581 |       |     |                |                |
| M00076 | V\$GATA2_01 | 4       | 15342 | (+) | NNNGATRNNN     | CCTGATCTTT     |
|        |             | 0.80198 |       |     |                |                |
| M00076 | V\$GATA2_01 | 5       | 15342 | (-) | NNNGATRNNN     | CCTGATCTTT     |
|        |             | 0.83872 |       |     |                |                |
| M00077 | V\$GATA3_01 | 4       | 15342 | (-) | NNGATARNG      | CCTGATCTT      |
|        |             | 0.78515 |       |     |                |                |
| M00127 | V\$GATA1_03 | 4       | 15348 | (-) | RNSNNGATAANNGN | CTTTTATTTTCGC  |
|        |             | 0.83168 |       |     |                |                |
| M00075 | V\$GATA1_01 | 8       | 15378 | (+) | SNNGATNNNN     | AATGATGTTT     |
|        |             | 0.82228 |       |     |                |                |
| M00076 | V\$GATA2_01 | 2       | 15378 | (+) | NNNGATRNNN     | AATGATGTTT     |
|        |             | 0.77196 |       |     |                |                |
| M00075 | V\$GATA1_01 | 4       | 15381 | (+) | SNNGATNNNN     | GATGTTTGTT     |
|        |             | 0.79201 |       |     |                |                |
| M00127 | V\$GATA1_03 | 4       | 15388 | (-) | RNSNNGATAANNGN | GTTTTATAACCTT  |
|        |             | 0.80799 |       |     |                |                |
| M00075 | V\$GATA1_01 | 6       | 15405 | (+) | SNNGATNNNN     | GGTGATTAAG     |
|        |             | 0.83872 |       |     |                |                |
| M00077 | V\$GATA3_01 | 4       | 15406 | (+) | NNGATARNG      | GTGATTAAG      |
|        |             | 0.79296 |       |     |                |                |
| M00076 | V\$GATA2_01 | 3       | 15429 | (+) | NNNGATRNNN     | AAGCATACTG     |
|        |             |         |       |     |                |                |
| M00076 | V\$GATA2_01 | 0.78304 | 15556 | (-) | NNNGATRNNN     | AATTATGGTC     |
|        |             | 0.87884 |       |     |                |                |
| M00203 | V\$GATA_C   | 4       | 15581 | (-) | NGATAAGNMNN    | ATTGCTGTCT     |
|        |             | 0.82386 |       |     |                |                |
| M00127 | V\$GATA1_03 | 1       | 15582 | (-) | RNSNNGATAANNGN | TTGCTGTCTTGAT  |
|        |             | 0.79201 |       |     |                |                |
| M00127 | V\$GATA1_03 | 4       | 15588 | (-) | RNSNNGATAANNGN | GTCTGATCCTCTT  |
|        |             | 0.81984 |       |     |                |                |
| M00075 | V\$GATA1_01 | 2       | 15590 | (+) | SNNGATNNNN     | CTTGATCCTC     |
|        |             | 0.77344 |       |     |                |                |
| M00075 | V\$GATA1_01 | 5       | 15590 | (-) | SNNGATNNNN     | CTTGATCCTC     |
|        |             |         |       |     |                |                |
| M00076 | V\$GATA2_01 | 0.81687 | 15590 | (-) | NNNGATRNNN     | CTTGATCCTC     |
|        |             | 0.81341 |       |     |                |                |
| M00128 | V\$GATA1_04 | 9       | 15596 | (-) | NNCWGATARNNNN  | CCTCTTTTCATAT  |
|        |             |         |       |     |                |                |
| M00126 | V\$GATA1_02 | 0.81125 | 15685 | (+) | NNNNNGATANKGNN | ACTTAGATAATATC |
|        |             | 0.79911 |       |     |                |                |
| M00127 | V\$GATA1_03 | 8       | 15685 | (+) | RNSNNGATAANNGN | ACTTAGATAATATC |
|        |             | 0.87416 |       |     |                |                |
| M00077 | V\$GATA3_01 | 9       | 15688 | (+) | NNGATARNG      | TAGATAATA      |
|        |             | 0.87045 |       |     |                |                |
| M00203 | V\$GATA_C   | 7       | 15689 | (+) | NGATAAGNMNN    | AGATAATATCA    |
|        |             |         |       |     |                |                |
| M00126 | V\$GATA1_02 | 0.825   | 15690 | (-) | NNNNNGATANKGNN | GATAATATCAATAA |
|        |             | 0.77048 |       |     |                |                |
| M00075 | V\$GATA1_01 | 4       | 15869 | (+) | SNNGATNNNN     | TATGATCACT     |
|        |             | 0.82273 |       |     |                |                |
| M00076 | V\$GATA2_01 | 3       | 15869 | (+) | NNNGATRNNN     | TATGATCACT     |
|        |             | 0.83130 |       |     |                |                |
| M00076 | V\$GATA2_01 | 4       | 15900 | (+) | NNNGATRNNN     | TCACATAGTT     |

|        |             |                    |       |     |                 |                |
|--------|-------------|--------------------|-------|-----|-----------------|----------------|
| M00203 | V\$GATA_C   | 0.87729<br>1       | 15916 | (-) | NGATAAGNMNN     | AGTATTGTCT     |
| M00128 | V\$GATA1_04 | 0.8269<br>0.83782  | 15923 | (+) | NNCWGATARNNNN   | GTCTGTTAAGAAG  |
| M00127 | V\$GATA1_03 | 5<br>0.78726       | 15930 | (+) | RNSNNGATAANNNGN | AAGAAGAAAACAGA |
| M00075 | V\$GATA1_01 | 6<br>0.81235       | 15955 | (+) | SNNGATNNNN      | ATAGATGTGT     |
| M00076 | V\$GATA2_01 | 9                  | 16080 | (+) | NNNGATRNNN      | TGACATACGT     |
| M00076 | V\$GATA2_01 | 0.79161<br>0.89782 | 16114 | (+) | NNNGATRNNN      | TGCCATATT      |
| M00075 | V\$GATA1_01 | 8<br>0.83581       | 16176 | (-) | SNNGATNNNN      | AAAAATCAGG     |
| M00076 | V\$GATA2_01 | 4<br>0.78890       | 16176 | (-) | NNNGATRNNN      | AAAAATCAGG     |
| M00076 | V\$GATA2_01 | 4<br>0.77295       | 16192 | (-) | NNNGATRNNN      | GGGTATGTGT     |
| M00075 | V\$GATA1_01 | 2<br>0.82408       | 16233 | (-) | SNNGATNNNN      | CTTCATCTTA     |
| M00076 | V\$GATA2_01 | 7<br>0.85999       | 16233 | (-) | NNNGATRNNN      | CTTCATCTTA     |
| M00077 | V\$GATA3_01 | 1<br>0.77295       | 16233 | (-) | NNGATARNG       | CTTCATCTT      |
| M00075 | V\$GATA1_01 | 2<br>0.82408       | 16241 | (+) | SNNGATNNNN      | TAAGATGAAG     |
| M00076 | V\$GATA2_01 | 7<br>0.85999       | 16241 | (+) | NNNGATRNNN      | TAAGATGAAG     |
| M00077 | V\$GATA3_01 | 1<br>0.79299       | 16242 | (+) | NNGATARNG       | AAGATGAAG      |
| M00127 | V\$GATA1_03 | 4<br>0.83628       | 16245 | (+) | RNSNNGATAANNNGN | ATGAAGAGAAAATG |
| M00203 | V\$GATA_C   | 5<br>0.81656       | 16265 | (-) | NGATAAGNMNN     | AAAGTGTATCT    |
| M00126 | V\$GATA1_02 | 2<br>0.78627       | 16266 | (-) | NNNNNGATANKGNN  | AAGTGTATCTTAAC |
| M00075 | V\$GATA1_01 | 8<br>0.86197       | 16268 | (-) | SNNGATNNNN      | GTGTATCTTA     |
| M00076 | V\$GATA2_01 | 6<br>0.81416       | 16268 | (-) | NNNGATRNNN      | GTGTATCTTA     |
| M00076 | V\$GATA2_01 | 3<br>0.78593       | 16304 | (+) | NNNGATRNNN      | CAGCATAACT     |
| M00126 | V\$GATA1_02 | 7                  | 16336 | (+) | NNNNNGATANKGNN  | TTACAGATGGGATT |
| M00075 | V\$GATA1_01 | 0.85538<br>0.85475 | 16338 | (+) | SNNGATNNNN      | ACAGATGGGA     |
| M00076 | V\$GATA2_01 | 9<br>0.88834       | 16338 | (+) | NNNGATRNNN      | ACAGATGGGA     |
| M00077 | V\$GATA3_01 | 7<br>0.79170       | 16339 | (+) | NNGATARNG       | CAGATGGGA      |
| M00075 | V\$GATA1_01 | 8<br>0.81912       | 16343 | (+) | SNNGATNNNN      | TGGGATTGAA     |
| M00076 | V\$GATA2_01 | 5                  | 16343 | (+) | NNNGATRNNN      | TGGGATTGAA     |
| M00077 | V\$GATA3_01 | 0.84537            | 16344 | (+) | NNGATARNG       | GGGATTGAA      |
| M00203 | V\$GATA_C   | 0.86269<br>0.85156 | 16375 | (-) | NGATAAGNMNN     | TTCATCTATCA    |
| M00126 | V\$GATA1_02 | 2<br>0.84321       | 16376 | (-) | NNNNNGATANKGNN  | TCATCTATCATGTC |
| M00127 | V\$GATA1_03 | 4<br>0.88541       | 16376 | (-) | RNSNNGATAANNNGN | TCATCTATCATGTC |
| M00128 | V\$GATA1_04 | 7<br>0.90819       | 16376 | (-) | NNCWGATARNNNN   | TCATCTATCATGT  |
| M00075 | V\$GATA1_01 | 3                  | 16378 | (-) | SNNGATNNNN      | ATCTATCATG     |

|        |             |                  |       |     |                       |                         |
|--------|-------------|------------------|-------|-----|-----------------------|-------------------------|
| M00076 | V\$GATA2_01 | 0.88858<br>8     | 16378 | (-) | NNNGATRNNN            | ATCTATCATG              |
| M00077 | V\$GATA3_01 | 0.85157<br>3     | 16378 | (-) | NNGATARNG             | ATCTATCAT               |
| M00076 | V\$GATA2_01 | 0.79386<br>6     | 16396 | (-) | NNNGATRNNN            | TTCTATCCAA              |
| M00077 | V\$GATA3_01 | 0.83739<br>5     | 16396 | (-) | NNGATARNG             | TTCTATCCA               |
| M00075 | V\$GATA1_01 | 0.85636<br>7     | 16432 | (-) | SNNGATNNNN            | GACAATCTCA              |
| M00076 | V\$GATA2_01 | 0.87099<br>7     | 16432 | (-) | NNNGATRNNN            | GACAATCTCA              |
| M00077 | V\$GATA3_01 | 0.8786<br>16432  | 16432 | (-) | NNGATARNG             | GACAATCTC               |
| M00075 | V\$GATA1_01 | 0.81786<br>8     | 16482 | (+) | SNNGATNNNN            | TTAGATTGTG              |
| M00076 | V\$GATA2_01 | 0.79792<br>5     | 16482 | (+) | NNNGATRNNN            | TTAGATTGTG              |
| M00077 | V\$GATA3_01 | 0.90385<br>5     | 16483 | (+) | NNGATARNG             | TAGATTGTG               |
| M00075 | V\$GATA1_01 | 0.77097<br>7     | 16492 | (-) | SNNGATNNNN            | TAACATCCTT              |
| M00076 | V\$GATA2_01 | 0.81822<br>3     | 16492 | (-) | NNNGATRNNN            | TAACATCCTT              |
| M00126 | V\$GATA1_02 | 0.8<br>16539     | 16539 | (-) | NNNNNGATANKGN         | AGTAGTATCATGCT          |
| M00127 | V\$GATA1_03 | 0.84982<br>9     | 16539 | (-) | RNSNNGATAANNNGN       | AGTAGTATCATGCT          |
| M00075 | V\$GATA1_01 | 0.88647<br>6     | 16541 | (-) | SNNGATNNNN            | TAGTATCATG              |
| M00076 | V\$GATA2_01 | 0.87370<br>3     | 16541 | (-) | NNNGATRNNN            | TAGTATCATG              |
| M00077 | V\$GATA3_01 | 0.82410<br>3     | 16541 | (-) | NNGATARNG             | TAGTATCAT               |
| M00075 | V\$GATA1_01 | 0.84748<br>3     | 16627 | (-) | SNNGATNNNN            | TTGAATCACC              |
| M00076 | V\$GATA2_01 | 0.78258<br>9     | 16627 | (-) | NNNGATRNNN            | TTGAATCACC              |
| M00075 | V\$GATA1_01 | 0.84304<br>16648 | 16648 | (-) | SNNGATNNNN            | TGCCATCATT              |
| M00076 | V\$GATA2_01 | 0.84799<br>3     | 16648 | (-) | NNNGATRNNN            | TGCCATCATT              |
| M00077 | V\$GATA3_01 | 0.83385<br>16648 | 16648 | (-) | NNGATARNG             | TGCCATCAT               |
| M00075 | V\$GATA1_01 | 0.83563<br>7     | 16680 | (+) | SNNGATNNNN            | TGAGATTTTG              |
| M00076 | V\$GATA2_01 | 0.85115<br>16680 | 16680 | (+) | NNNGATRNNN            | TGAGATTTTG              |
| M00077 | V\$GATA3_01 | 0.88524<br>6     | 16681 | (+) | NNGATARNG             | GAGATTTTG               |
| M00203 | V\$GATA_C   | 0.83690<br>6     | 16682 | (-) | NGATAAGNMNN           | AGATTTTGTCT             |
| M00162 | V\$OCT1_06  | 0.80078<br>1     | 34    | (+) | CWNAWTKWSATRYN        | CAGTCTTGGGTCA           |
| M00138 | V\$OCT1_04  | 0.78398<br>2     | 46    | (-) | NNNNNNNNWATGCAAATNNNW | CAAGGTATTATGTATACATATAA |
| M00138 | V\$OCT1_04  | 0.82057<br>7     | 47    | (+) | NNNNNNNNWATGCAAATNNNW | AAGGTATTATGTATACATATAAA |
| M00136 | V\$OCT1_02  | 0.77910<br>1     | 49    | (+) | NNGAATATKCANNNN       | GGTATTATGTATACA         |
| M00138 | V\$OCT1_04  | 0.86658<br>3     | 51    | (+) | NNNNNNNNWATGCAAATNNNW | TATTATGTATACATATAAAAAAA |
| M00138 | V\$OCT1_04  | 0.80175<br>7     | 53    | (+) | NNNNNNNNWATGCAAATNNNW | TTATGTATACATATAAAAAAACT |
| M00138 | V\$OCT1_04  | 0.79192<br>8     | 55    | (+) | NNNNNNNNWATGCAAATNNNW | ATGTATACATATAAAAAAACTTA |

|        |            |              |     |     |                              |                         |
|--------|------------|--------------|-----|-----|------------------------------|-------------------------|
| M00138 | V\$OCT1_04 | 0.80782<br>1 | 56  | (-) | NNNNNNNNWATGCAAATNNNW<br>NNW | TGTATACATATAAAAAAACTTAT |
| M00138 | V\$OCT1_04 | 0.81388<br>5 | 57  | (+) | NNNNNNNNWATGCAAATNNNW<br>NNW | GTATACATATAAAAAAACTTATT |
| M00162 | V\$OCT1_06 | 0.81367<br>2 | 62  | (-) | CWNAWTKWSATRYN               | CATATAAAAAAACT          |
| M00162 | V\$OCT1_06 | 0.83203<br>1 | 74  | (+) | CWNAWTKWSATRYN               | CTTATTTTATTTTC          |
| M00138 | V\$OCT1_04 | 0.78962<br>8 | 75  | (-) | NNNNNNNNWATGCAAATNNNW<br>NNW | TTATTTTATTTTCCTCTGTCTCA |
| M00162 | V\$OCT1_06 | 0.82929<br>7 | 96  | (-) | CWNAWTKWSATRYN               | CATCTTAATTCTT           |
| M00138 | V\$OCT1_04 | 0.81012<br>1 | 98  | (-) | NNNNNNNNWATGCAAATNNNW<br>NNW | TCTTTAATTCTTCACTAATACGC |
| M00136 | V\$OCT1_02 | 0.79967<br>5 | 111 | (+) | NNGAATATKCANNNN              | ACTAATACGCAGTTG         |
| M00137 | V\$OCT1_03 | 0.87672<br>9 | 136 | (-) | NNNRTAATNANNN                | ATGTGATTGCAAG           |
| M00162 | V\$OCT1_06 | 0.82148<br>4 | 139 | (-) | CWNAWTKWSATRYN               | TGATTGCAAGTATT          |
| M00162 | V\$OCT1_06 | 0.81367<br>2 | 153 | (+) | CWNAWTKWSATRYN               | GGTACTTTCCTATG          |
| M00138 | V\$OCT1_04 | 0.80405<br>7 | 173 | (-) | NNNNNNNNWATGCAAATNNNW<br>NNW | TGTTAGCTTAAAAATATATTTGC |
| M00138 | V\$OCT1_04 | 0.78816<br>4 | 183 | (-) | NNNNNNNNWATGCAAATNNNW<br>NNW | AAAAATATTTGCAAATGTTGAT  |
| M00138 | V\$OCT1_04 | 0.83772<br>5 | 184 | (+) | NNNNNNNNWATGCAAATNNNW<br>NNW | AAATATATTTGCAAATGTTGATA |
| M00135 | V\$OCT1_01 | 0.84261<br>7 | 185 | (-) | NNNNWTATGCAAATNTNNN          | AATATATTTGCAAATGTTG     |
| M00135 | V\$OCT1_01 | 0.85864<br>2 | 186 | (+) | NNNNWTATGCAAATNTNNN          | ATATATTTGCAAATGTTGA     |
| M00195 | V\$OCT1_Q6 | 0.81468<br>3 | 188 | (+) | NNNNATGCAAATNAN              | ATATTTGCAAATGTT         |
| M00162 | V\$OCT1_06 | 0.83437<br>5 | 189 | (-) | CWNAWTKWSATRYN               | TATTTGCAAATGTT          |
| M00138 | V\$OCT1_04 | 0.80175<br>7 | 190 | (+) | NNNNNNNNWATGCAAATNNNW<br>NNW | ATTTGCAAATGTTGATACTATCT |
| M00162 | V\$OCT1_06 | 0.87851<br>6 | 195 | (+) | CWNAWTKWSATRYN               | CAAATGTTGATACT          |
| M00162 | V\$OCT1_06 | 0.80078<br>1 | 210 | (-) | CWNAWTKWSATRYN               | TCTATCTCAGAGCT          |
| M00162 | V\$OCT1_06 | 0.94531<br>2 | 231 | (+) | CWNAWTKWSATRYN               | AAAAATTAAATACT          |
| M00162 | V\$OCT1_06 | 0.81367<br>2 | 231 | (-) | CWNAWTKWSATRYN               | AAAAATTAAATACT          |
| M00162 | V\$OCT1_06 | 0.88554<br>7 | 232 | (-) | CWNAWTKWSATRYN               | AAAAATTAAATACTT         |
| M00248 | V\$OCT1_07 | 0.79330<br>1 | 233 | (-) | TNTATGNTAATT                 | AAATTAAATACT            |
| M00137 | V\$OCT1_03 | 0.84077<br>4 | 245 | (+) | NNNRTAATNANNN                | TTTATAAAGACCA           |
| M00138 | V\$OCT1_04 | 0.83207<br>9 | 275 | (+) | NNNNNNNNWATGCAAATNNNW<br>NNW | TAAAATAAATTCTTATATACTGA |
| M00162 | V\$OCT1_06 | 0.82148<br>4 | 275 | (-) | CWNAWTKWSATRYN               | TAAAATAAATTCTT          |
| M00162 | V\$OCT1_06 | 0.84218<br>7 | 282 | (+) | CWNAWTKWSATRYN               | AATTCTTATATACT          |
| M00138 | V\$OCT1_04 | 0.78021<br>7 | 292 | (+) | NNNNNNNNWATGCAAATNNNW<br>NNW | TACTGAAAATGTAGATACATAAC |
| M00136 | V\$OCT1_02 | 0.78884<br>7 | 294 | (+) | NNGAATATKCANNNN              | CTGAAAATGTAGATA         |
| M00162 | V\$OCT1_06 | 0.86015<br>6 | 297 | (+) | CWNAWTKWSATRYN               | AAAATGTAGATACA          |
| M00138 | V\$OCT1_04 | 0.78941<br>9 | 298 | (+) | NNNNNNNNWATGCAAATNNNW<br>NNW | AAATGTAGATACATAACTTCAGT |



|        |            |                |     |     |                             |                          |
|--------|------------|----------------|-----|-----|-----------------------------|--------------------------|
| M00138 | V\$OCT1_04 | 0.83375<br>2   | 321 | (+) | NNNNNNNWATGCAAATNNNW<br>NNW | ATAGATTTATGGTAAAAATAATTT |
| M00135 | V\$OCT1_01 | 0.79435<br>3   | 323 | (+) | NNNNWTATGCAAATNTNNN         | AGATTTATGGTAAAAATAAT     |
| M00248 | V\$OCT1_07 | 0.79520<br>9   | 326 | (+) | TNTATGNTAATT                | TTTATGGTAAAA             |
| M00138 | V\$OCT1_04 | 0.85654<br>5   | 333 | (-) | NNNNNNNWATGCAAATNNNW<br>NNW | TAAAATAATTTGAATCATTTTTG  |
| M00135 | V\$OCT1_01 | 0.73616<br>9   | 335 | (-) | NNNNWTATGCAAATNTNNN         | AAATAATTTGAATCATTTT      |
| M00162 | V\$OCT1_06 | 0.84726<br>6   | 336 | (+) | CWNAWTKWSATRYN              | AATAATTTGAATCA           |
| M00195 | V\$OCT1_Q6 | 0.82287<br>1   | 337 | (-) | NNNNATGCAAATNAN             | ATAATTTGAATCATT          |
| M00248 | V\$OCT1_07 | 0.79796<br>5   | 339 | (-) | TNTATGNTAATT                | AATTTGAATCAT             |
| M00162 | V\$OCT1_06 | 0.82617<br>2   | 349 | (+) | CWNAWTKWSATRYN              | ATTTTTGTCAAATT           |
| M00162 | V\$OCT1_06 | 0.86796<br>9   | 369 | (+) | CWNAWTKWSATRYN              | AATGTTGTCATACA           |
| M00138 | V\$OCT1_04 | 0.79360<br>1   | 370 | (+) | NNNNNNNWATGCAAATNNNW<br>NNW | ATGTTGTCATACAGAATAATTTA  |
| M00138 | V\$OCT1_04 | 0.82496<br>9   | 380 | (+) | NNNNNNNWATGCAAATNNNW<br>NNW | ACAGAATAATTTATAATTTTTTT  |
| M00138 | V\$OCT1_04 | 0.81639<br>5   | 382 | (-) | NNNNNNNWATGCAAATNNNW<br>NNW | AGAATAATTTATAATTTTTTTGT  |
| M00195 | V\$OCT1_Q6 | 0.80922<br>5   | 385 | (-) | NNNNATGCAAATNAN             | ATAATTTATAATTTT          |
| M00137 | V\$OCT1_03 | 0.85894<br>9   | 389 | (+) | NNNRTAATNANNN               | TTTATAATTTTTT            |
| M00138 | V\$OCT1_04 | 0.78042<br>7   | 396 | (-) | NNNNNNNWATGCAAATNNNW<br>NNW | TTTTTTTGTTTCATGGTGAAGA   |
| M00136 | V\$OCT1_02 | 0.79832<br>2   | 425 | (-) | NNGAATATKCANNNN             | CTGTAGAATATTTTCG         |
| M00162 | V\$OCT1_06 | 0.80664<br>1   | 447 | (+) | CWNAWTKWSATRYN              | TTTTATTCCATGTA           |
| M00162 | V\$OCT1_06 | 0.84609<br>4   | 453 | (-) | CWNAWTKWSATRYN              | TCCATGTAATTAGG           |
| M00137 | V\$OCT1_03 | 0.93441<br>3   | 455 | (+) | NNNRTAATNANNN               | CATGTAATTAGGT            |
| M00137 | V\$OCT1_03 | 0.87119<br>7   | 456 | (-) | NNNRTAATNANNN               | ATGTAATTAGGTT            |
| M00138 | V\$OCT1_04 | 0.85110<br>8   | 456 | (+) | NNNNNNNWATGCAAATNNNW<br>NNW | ATGTAATTAGGTTAATAAAATTA  |
| M00135 | V\$OCT1_01 | 0.73655<br>1   | 458 | (+) | NNNNWTATGCAAATNTNNN         | GTAATTAGGTTAATAAAAT      |
| M00162 | V\$OCT1_06 | 0.82656<br>2   | 470 | (+) | CWNAWTKWSATRYN              | ATAAAATTAATTTT           |
| M00162 | V\$OCT1_06 | 0.82656<br>2   | 472 | (-) | CWNAWTKWSATRYN              | AAAATTAATTTTAT           |
| M00137 | V\$OCT1_03 | 0.86092<br>5   | 503 | (+) | NNNRTAATNANNN               | TAGACAATTAGAT            |
| M00162 | V\$OCT1_06 | 0.94531<br>2   | 505 | (+) | CWNAWTKWSATRYN              | GACAATTAGATATA           |
| M00138 | V\$OCT1_04 | 0.79694<br>7   | 506 | (+) | NNNNNNNWATGCAAATNNNW<br>NNW | ACAATTAGATATAAATGATTACT  |
| M00138 | V\$OCT1_04 | 0.81744<br>507 | (-) | NNW | NNNNNNNWATGCAAATNNNW<br>NNW | CAATTAGATATAAATGATTACTT  |
| M00137 | V\$OCT1_03 | 0.89450<br>8   | 518 | (-) | NNNRTAATNANNN               | AAATGATTACTTT            |
| M00138 | V\$OCT1_04 | 0.79339<br>2   | 524 | (+) | NNNNNNNWATGCAAATNNNW<br>NNW | TTACTTTTATAAAGATGATTAAA  |
| M00138 | V\$OCT1_04 | 0.78168<br>1   | 525 | (-) | NNNNNNNWATGCAAATNNNW<br>NNW | TACTTTTATAAAGATGATTAAAT  |
| M00137 | V\$OCT1_03 | 0.89371<br>8   | 529 | (+) | NNNRTAATNANNN               | TTTATAAAGATGA            |

|        |            |                |     |                                              |                                          |                          |
|--------|------------|----------------|-----|----------------------------------------------|------------------------------------------|--------------------------|
| M00138 | V\$OCT1_04 | 0.81911<br>3   | 530 | (+)                                          | NNNNNNNNWATGCAAATNNNW<br>NNW             | TTATAAAGATGATTAAATTTGGA  |
| M00162 | V\$OCT1_06 | 0.83710<br>9   | 537 | (+)                                          | CWNAWTKWSATRYN                           | GATGATTAAATTTG           |
| M00138 | V\$OCT1_04 | 0.90924<br>3   | 539 | (-)                                          | NNNNNNNNWATGCAAATNNNW<br>NNW             | TGATTAAATTTGGATATTTATAA  |
| M00138 | V\$OCT1_04 | 0.79903<br>8   | 540 | (+)                                          | NNNNNNNNWATGCAAATNNNW<br>NNW             | GATTAAATTTGGATATTTATAAG  |
| M00135 | V\$OCT1_01 | 0.88706<br>6   | 541 | (-)                                          | NNNNWTATGCAAATNTNNN                      | ATTAAATTTGGATATTTAT      |
| M00135 | V\$OCT1_01 | 0.73006<br>5   | 542 | (+)                                          | NNNNWTATGCAAATNTNNN                      | TTAAATTTGGATATTTATA      |
| M00162 | V\$OCT1_06 | 0.87343<br>7   | 543 | (+)                                          | CWNAWTKWSATRYN                           | TAAATTTGGATATT           |
| M00195 | V\$OCT1_Q6 | 0.79121<br>2   | 543 | (-)                                          | NNNNATGCAAATNAN                          | TAAATTTGGATATTT          |
| M00136 | V\$OCT1_02 | 0.85977<br>3   | 545 | (-)                                          | NNGAATATKCANNNN<br>NNNNNNNNWATGCAAATNNNW | AATTTGGATATTTAT          |
| M00138 | V\$OCT1_04 | 0.79339<br>2   | 545 | (-)                                          | NNW                                      | AATTTGGATATTTATAAGGATAC  |
| M00248 | V\$OCT1_07 | 0.85499<br>3   | 545 | (-)                                          | TNTATGNTAATT                             | AATTTGGATATT             |
| M00138 | V\$OCT1_04 | 0.82036<br>8   | 546 | (+)                                          | NNNNNNNNWATGCAAATNNNW<br>NNW             | ATTTGGATATTTATAAGGATACA  |
| M00136 | V\$OCT1_02 | 0.78586<br>9   | 548 | (+)                                          | NNGAATATKCANNNN<br>NNNNNNNNWATGCAAATNNNW | TTGGATATTTATAAG          |
| M00138 | V\$OCT1_04 | 0.85173<br>6   | 556 | (+)                                          | NNW                                      | TTATAAGGATACAAATATATGAA  |
| M00135 | V\$OCT1_01 | 0.77356<br>558 | (+) | NNNNWTATGCAAATNTNNN<br>NNNNNNNNWATGCAAATNNNW | ATAAGGATACAAATATATG                      |                          |
| M00138 | V\$OCT1_04 | 0.85089<br>9   | 566 | (+)                                          | NNW                                      | ACAAATATATGAAAATAATAAAC  |
| M00135 | V\$OCT1_01 | 0.81323<br>9   | 568 | (+)                                          | NNNNWTATGCAAATNTNNN                      | AAATATATGAAAATAATAA      |
| M00195 | V\$OCT1_Q6 | 0.90120<br>1   | 570 | (+)                                          | NNNNATGCAAATNAN                          | ATATATGAAAATAAT          |
| M00162 | V\$OCT1_06 | 0.94257<br>8   | 571 | (-)                                          | CWNAWTKWSATRYN                           | TATATGAAAATAAT           |
| M00248 | V\$OCT1_07 | 0.79478<br>5   | 571 | (+)                                          | TNTATGNTAATT                             | TATATGAAAATA             |
| M00162 | V\$OCT1_06 | 0.81210<br>9   | 597 | (-)                                          | CWNAWTKWSATRYN                           | GGCTTATAAATATG           |
| M00137 | V\$OCT1_03 | 0.88147<br>599 | (+) | NNNRTAATNANNN<br>NNNNNNNNWATGCAAATNNNW       | CTTATAAATATGT                            |                          |
| M00138 | V\$OCT1_04 | 0.78711<br>8   | 599 | (-)                                          | NNW                                      | CTTATAAATATGTCTTTTTTAAC  |
| M00138 | V\$OCT1_04 | 0.79192<br>8   | 600 | (+)                                          | NNNNNNNNWATGCAAATNNNW<br>NNW             | TTATAAATATGTCTTTTTTAACA  |
| M00136 | V\$OCT1_02 | 0.78343<br>3   | 602 | (+)                                          | NNGAATATKCANNNN                          | ATAAATATGTCTTTT          |
| M00162 | V\$OCT1_06 | 0.82890<br>6   | 604 | (+)                                          | CWNAWTKWSATRYN                           | AAATATGTCTTTTT           |
| M00162 | V\$OCT1_06 | 0.87578<br>1   | 605 | (-)                                          | CWNAWTKWSATRYN                           | AATATGTCTTTTTT           |
| M00162 | V\$OCT1_06 | 0.85507<br>8   | 662 | (-)                                          | CWNAWTKWSATRYN                           | TGTATAAAATAATC           |
| M00137 | V\$OCT1_03 | 0.85262<br>7   | 675 | (-)                                          | NNNRTAATNANNN<br>NNNNNNNNWATGCAAATNNNW   | CTGTCATTAGTCT            |
| M00138 | V\$OCT1_04 | 0.78189<br>688 | (+) | NNW                                          | GCTGACTAAGGTATAAACAAATT                  |                          |
| M00138 | V\$OCT1_04 | 0.78105<br>4   | 694 | (+)                                          | NNNNNNNNWATGCAAATNNNW<br>NNW             | TAAGGTATAAACAAATTTTCATGT |
| M00135 | V\$OCT1_01 | 0.79168<br>3   | 696 | (+)                                          | NNNNWTATGCAAATNTNNN                      | AGGTATAAACAAATTTTCAT     |
| M00137 | V\$OCT1_03 | 0.85618<br>3   | 697 | (+)                                          | NNNRTAATNANNN                            | GGTATAAACAAAT            |

|        |            |         |     |     |                       |                          |
|--------|------------|---------|-----|-----|-----------------------|--------------------------|
|        |            | 0.88906 |     |     |                       |                          |
| M00162 | V\$OCT1_06 | 2       | 704 | (+) | CWNAWTKWSATRYN        | ACAAATTCATGTA            |
|        |            | 0.80782 |     |     | NNNNNNNNWATGCAAATNNNW |                          |
| M00138 | V\$OCT1_04 | 1       | 705 | (+) | NNW                   | CAAATTCATGTATAATCTAATT   |
|        |            | 0.88554 |     |     |                       |                          |
| M00162 | V\$OCT1_06 | 7       | 705 | (-) | CWNAWTKWSATRYN        | CAAATTCATGTAT            |
|        |            | 0.78884 |     |     |                       |                          |
| M00136 | V\$OCT1_02 | 7       | 710 | (-) | NNGAATATKCANNNN       | TTCATGTATAATCTA          |
|        |            | 0.78293 |     |     | NNNNNNNNWATGCAAATNNNW |                          |
| M00138 | V\$OCT1_04 | 6       | 711 | (+) | NNW                   | TCATGTATAATCTAATTTTCTT   |
|        |            | 0.75333 |     |     |                       |                          |
| M00135 | V\$OCT1_01 | 8       | 713 | (+) | NNNNWTATGCAAATNTNNN   | ATGTATAATCTAATTTTTC      |
|        |            | 0.85578 |     |     |                       |                          |
| M00137 | V\$OCT1_03 | 8       | 714 | (+) | NNNRTAATNANNN         | TGTATAATCTAAT            |
|        |            | 0.83845 |     |     |                       |                          |
| M00248 | V\$OCT1_07 | 7       | 716 | (+) | TNTATGNTAATT          | TATAATCTAATT             |
|        |            | 0.86835 |     |     |                       |                          |
| M00162 | V\$OCT1_06 | 9       | 717 | (-) | CWNAWTKWSATRYN        | ATAATCTAATTTTT           |
|        |            | 0.75314 |     |     |                       |                          |
| M00135 | V\$OCT1_01 | 8       | 721 | (-) | NNNNWTATGCAAATNTNNN   | TCTAATTTTCTTATTTAT       |
|        |            | 0.84196 |     |     |                       |                          |
| M00137 | V\$OCT1_03 | 0.84218 | 730 | (-) | NNNRTAATNANNN         | TCTTATTTATCTG            |
|        |            | 7       |     |     |                       |                          |
| M00162 | V\$OCT1_06 | 0.82109 | 736 | (+) | CWNAWTKWSATRYN        | TTATCTGAAATGCA           |
|        |            | 4       |     |     |                       |                          |
| M00162 | V\$OCT1_06 | 0.84765 | 737 | (-) | CWNAWTKWSATRYN        | TATCTGAAATGCAT           |
|        |            | 6       |     |     |                       |                          |
| M00162 | V\$OCT1_06 | 0.80185 | 740 | (+) | CWNAWTKWSATRYN        | CTGAAATGCATTTT           |
|        |            | 6       |     |     |                       |                          |
| M00195 | V\$OCT1_Q6 | 0.82485 | 740 | (-) | NNNNATGCAAATNAN       | CTGAAATGCATTTTT          |
|        |            | 1       |     |     |                       |                          |
| M00136 | V\$OCT1_02 | 0.82929 | 742 | (-) | NNGAATATKCANNNN       | GAAATGCATTTTTTC          |
|        |            | 7       |     |     |                       |                          |
| M00162 | V\$OCT1_06 | 0.78168 | 742 | (-) | CWNAWTKWSATRYN        | GAAATGCATTTTTT           |
|        |            | 1       |     |     | NNNNNNNNWATGCAAATNNNW |                          |
| M00138 | V\$OCT1_04 | 0.81033 | 754 | (+) | NNW                   | TTCAGCACATATAAAATTTATGTA |
|        |            |         |     |     | NNNNNNNNWATGCAAATNNNW |                          |
| M00138 | V\$OCT1_04 |         | 755 | (-) | NNW                   | TCAGCACATATAAAATTTATGTAT |
|        |            | 0.7314  |     |     |                       |                          |
| M00135 | V\$OCT1_01 | 0.84765 | 756 | (+) | NNNNWTATGCAAATNTNNN   | CAGCACATATAAAATTTATG     |
|        |            | 6       |     |     |                       |                          |
| M00162 | V\$OCT1_06 | 0.81992 | 759 | (+) | CWNAWTKWSATRYN        | CACATATAAAATTTA          |
|        |            | 2       |     |     |                       |                          |
| M00162 | V\$OCT1_06 | 0.80429 | 759 | (-) | CWNAWTKWSATRYN        | CACATATAAAATTTA          |
|        |            | 7       |     |     |                       |                          |
| M00162 | V\$OCT1_06 | 0.82148 | 761 | (-) | CWNAWTKWSATRYN        | CATATAAAATTTATG          |
|        |            | 4       |     |     |                       |                          |
| M00162 | V\$OCT1_06 | 0.80039 | 765 | (-) | CWNAWTKWSATRYN        | TAAATTTATGTATT           |
|        |            | 1       |     |     |                       |                          |
| M00162 | V\$OCT1_06 | 0.81718 | 768 | (+) | CWNAWTKWSATRYN        | ATTTATGTATTTTA           |
|        |            | 7       |     |     |                       |                          |
| M00162 | V\$OCT1_06 | 0.80859 | 769 | (-) | CWNAWTKWSATRYN        | TTTATGTATTTTAG           |
|        |            | 4       |     |     |                       |                          |
| M00162 | V\$OCT1_06 | 0.80078 | 773 | (-) | CWNAWTKWSATRYN        | TGTATTTTAGGGTC           |
|        |            | 1       |     |     |                       |                          |
| M00162 | V\$OCT1_06 | 0.82109 | 783 | (+) | CWNAWTKWSATRYN        | GGTCTTGCAATTTA           |
|        |            | 4       |     |     |                       |                          |
| M00162 | V\$OCT1_06 | 0.80703 | 823 | (+) | CWNAWTKWSATRYN        | ATGTTTGACTTATA           |
|        |            | 1       |     |     |                       |                          |
| M00162 | V\$OCT1_06 | 0.77070 | 829 | (-) | CWNAWTKWSATRYN        | GACTTATAATTCTG           |
|        |            | 9       |     |     |                       |                          |
| M00136 | V\$OCT1_02 | 0.83945 | 846 | (+) | NNGAATATKCANNNN       | AATCATCTTCATACA          |
|        |            | 3       |     |     |                       |                          |
| M00162 | V\$OCT1_06 | 0.86835 | 847 | (+) | CWNAWTKWSATRYN        | ATCATCTTCATACA           |
|        |            | 9       |     |     |                       |                          |
| M00162 | V\$OCT1_06 |         | 855 | (+) | CWNAWTKWSATRYN        | CATACAGTCATGTC           |

|        |            |                    |      |     |                              |                         |
|--------|------------|--------------------|------|-----|------------------------------|-------------------------|
| M00162 | V\$OCT1_06 | 0.84218<br>7       | 860  | (+) | CWNAWTKWSATRYN               | AGTCATGTCATGGA          |
| M00162 | V\$OCT1_06 | 0.83710<br>9       | 861  | (-) | CWNAWTKWSATRYN               | GTCATGTCATGGAT          |
| M00162 | V\$OCT1_06 | 0.80429<br>7       | 887  | (+) | CWNAWTKWSATRYN               | CAAAATTAAGTAAT          |
| M00162 | V\$OCT1_06 | 0.80078<br>1       | 887  | (-) | CWNAWTKWSATRYN               | CAAAATTAAGTAAT          |
| M00162 | V\$OCT1_06 | 0.86835<br>9       | 915  | (+) | CWNAWTKWSATRYN               | AAAAATTTAATGAA          |
| M00138 | V\$OCT1_04 | 0.80259<br>3       | 916  | (+) | NNNNNNNNWATGCAAATNNNW<br>NNW | AAAATTTAATGAAGGTTAATAGT |
| M00162 | V\$OCT1_06 | 0.92460<br>9       | 916  | (-) | CWNAWTKWSATRYN               | AAAATTTAATGAAG          |
| M00162 | V\$OCT1_06 | 0.83437<br>5       | 959  | (+) | CWNAWTKWSATRYN               | ATGCTTTTCATGAA          |
| M00195 | V\$OCT1_Q6 | 0.82669<br>2       | 959  | (-) | NNNNATGCAAATNAN              | ATGCTTTTCATGAAG         |
| M00162 | V\$OCT1_06 | 0.85507<br>8       | 960  | (-) | CWNAWTKWSATRYN               | TGCTTTTCATGAAG          |
| M00137 | V\$OCT1_03 | 0.87356<br>8       | 994  | (+) | NNNRTAATNANNN                | AGGATAAAGACAT           |
| M00162 | V\$OCT1_06 | 0.80664<br>1       | 996  | (+) | CWNAWTKWSATRYN               | GATAAAGACATCTT          |
| M00162 | V\$OCT1_06 | 0.80039<br>1       | 1005 | (+) | CWNAWTKWSATRYN               | ATCTTTTAAAAATT          |
| M00162 | V\$OCT1_06 | 0.87578<br>1       | 1012 | (+) | CWNAWTKWSATRYN               | AAAAATTACAGATA          |
| M00162 | V\$OCT1_06 | 0.81367<br>2       | 1013 | (-) | CWNAWTKWSATRYN               | AAAATTACAGATAA          |
| M00162 | V\$OCT1_06 | 0.89687<br>5       | 1024 | (+) | CWNAWTKWSATRYN               | TAAAATTAAATGTA          |
| M00162 | V\$OCT1_06 | 0.83437<br>5       | 1025 | (-) | CWNAWTKWSATRYN               | AAAATTAAATGTAA          |
| M00162 | V\$OCT1_06 | 0.86054<br>7       | 1029 | (+) | CWNAWTKWSATRYN               | TTAAATGTAATTTA          |
| M00195 | V\$OCT1_Q6 | 0.83133<br>2       | 1029 | (+) | NNNNATGCAAATNAN              | TTAAATGTAATTTAC         |
| M00162 | V\$OCT1_06 | 0.94531<br>2       | 1030 | (-) | CWNAWTKWSATRYN               | TAAATGTAATTTAC          |
| M00248 | V\$OCT1_07 | 0.81238<br>1       | 1030 | (+) | TNTATGNTAATT                 | TAAATGTAATTT            |
| M00195 | V\$OCT1_Q6 | 0.79093<br>9       | 1035 | (-) | NNNNATGCAAATNAN              | GTAATTTACCAGTTT         |
| M00138 | V\$OCT1_04 | 0.80447<br>5       | 1047 | (-) | NNNNNNNNWATGCAAATNNNW<br>NNW | TTTGTATTTATCAATTTTAACAA |
| M00138 | V\$OCT1_04 | 0.78063<br>6       | 1052 | (+) | NNNNNNNNWATGCAAATNNNW<br>NNW | GTTTATCAATTTTAACAAATCCA |
| M00138 | V\$OCT1_04 | 0.80071<br>1       | 1053 | (-) | NNNNNNNNWATGCAAATNNNW<br>NNW | TTTATCAATTTTAACAAATCCA  |
| M00162 | V\$OCT1_06 | 0.88554<br>7       | 1067 | (-) | CWNAWTKWSATRYN               | CAAATCCAATGATC          |
| M00162 | V\$OCT1_06 | 0.83437<br>5       | 1080 | (+) | CWNAWTKWSATRYN               | CTACAGGAAATTTT          |
| M00162 | V\$OCT1_06 | 0.87578<br>1       | 1081 | (-) | CWNAWTKWSATRYN               | TACAGGAAATTTTT          |
| M00138 | V\$OCT1_04 | 0.82455<br>0.82656 | 1087 | (-) | NNNNNNNNWATGCAAATNNNW<br>NNW | AAATTTTTTTTTAATTTTTATTG |
| M00162 | V\$OCT1_06 | 0.83167<br>2       | 1091 | (+) | CWNAWTKWSATRYN               | TTTTTTTTAATTTT          |
| M00248 | V\$OCT1_07 | 0.86846<br>3       | 1091 | (+) | TNTATGNTAATT                 | TTTTTTTTAATT            |
| M00138 | V\$OCT1_04 | 0.80485<br>5       | 1093 | (-) | NNNNNNNNWATGCAAATNNNW<br>NNW | TTTTTTAATTTTTATTGTCATAT |
| M00195 | V\$OCT1_Q6 | 0.80485<br>8       | 1097 | (-) | NNNNATGCAAATNAN              | TTAATTTTTATTGTC         |

|        |            |                         |      |     |                              |                          |
|--------|------------|-------------------------|------|-----|------------------------------|--------------------------|
| M00138 | V\$OCT1_04 | 0.84065<br>2            | 1099 | (-) | NNNNNNNNWATGCAAATNNNW<br>NNW | AATTTTATTGTCATATTTTAAA   |
| M00135 | V\$OCT1_01 | 0.74532<br>6            | 1101 | (-) | NNNNWTATGCAAATNTNNN          | TTTTATTGTCATATTTTA       |
| M00162 | V\$OCT1_06 | 0.88632<br>8            | 1103 | (+) | CWNAWTKWSATRYN               | TTTATTGTCATATT           |
| M00195 | V\$OCT1_Q6 | 0.81304<br>6            | 1103 | (-) | NNNNATGCAAATNAN              | TTTATTGTCATATT           |
| M00138 | V\$OCT1_04 | 0.79443<br>7            | 1107 | (-) | NNNNNNNNWATGCAAATNNNW<br>NNW | TTGTCATATTTTAAAATTGTAA   |
| M00162 | V\$OCT1_06 | 0.86562<br>5            | 1111 | (+) | CWNAWTKWSATRYN               | CATATTTTAAAAATT          |
| M00162 | V\$OCT1_06 | 0.82148<br>4            | 1111 | (-) | CWNAWTKWSATRYN               | CATATTTTAAAAATT          |
| M00162 | V\$OCT1_06 | 0.80039<br>1            | 1112 | (+) | CWNAWTKWSATRYN               | ATATTTTAAAAATT           |
| M00162 | V\$OCT1_06 | 0.86562<br>5            | 1113 | (-) | CWNAWTKWSATRYN               | TATTTTAAAAATTTG          |
| M00138 | V\$OCT1_04 | 0.80761<br>2            | 1115 | (-) | NNNNNNNNWATGCAAATNNNW<br>NNW | TTTTAAAAATTTGTAATATTTAAA |
| M00138 | V\$OCT1_04 | 0.81681<br>3            | 1116 | (-) | NNNNNNNNWATGCAAATNNNW<br>NNW | TTTAAAAATTTGTAATATTTAAAT |
| M00162 | V\$OCT1_06 | 0.90351<br>6            | 1120 | (+) | CWNAWTKWSATRYN               | AAATTTGTAATATT           |
| M00138 | V\$OCT1_04 | 0.7821<br>0.84960       | 1121 | (+) | NNNNNNNNWATGCAAATNNNW<br>NNW | AATTTGTAATATTTAAATATTGA  |
| M00162 | V\$OCT1_06 | 9                       | 1121 | (-) | CWNAWTKWSATRYN               | AATTTGTAATATTT           |
| M00137 | V\$OCT1_03 | 0.85578<br>8            | 1123 | (+) | NNNRTAATNANNN                | TTTGTAATATTTA            |
| M00138 | V\$OCT1_04 | 0.84148<br>9            | 1123 | (+) | NNNNNNNNWATGCAAATNNNW<br>NNW | TTTGTAATATTTAAATATTGATA  |
| M00138 | V\$OCT1_04 | 0.86825<br>6            | 1124 | (-) | NNNNNNNNWATGCAAATNNNW<br>NNW | TTGTAATATTTAAATATTGATAC  |
| M00135 | V\$OCT1_01 | 0.80427<br>3            | 1125 | (+) | NNNNWTATGCAAATNTNNN          | TGTAATATTTAAATATTGA      |
| M00136 | V\$OCT1_02 | 0.81700<br>1            | 1125 | (+) | NNGAATATKCANNNN              | TGTAATATTTAAATA          |
| M00135 | V\$OCT1_01 | 0.82067<br>9            | 1126 | (-) | NNNNWTATGCAAATNTNNN          | GTAATATTTAAATATTGAT      |
| M00162 | V\$OCT1_06 | 0.9375                  | 1128 | (+) | CWNAWTKWSATRYN               | AATATTTAAATATT           |
| M00162 | V\$OCT1_06 | 0.9375                  | 1128 | (-) | CWNAWTKWSATRYN               | AATATTTAAATATT           |
| M00136 | V\$OCT1_02 | 0.85760<br>7            | 1130 | (-) | NNGAATATKCANNNN              | TATTTAAATATTGAT          |
| M00138 | V\$OCT1_04 | 0.81074<br>9            | 1130 | (-) | NNNNNNNNWATGCAAATNNNW<br>NNW | TATTTAAATATTGATACTTCTCT  |
| M00138 | V\$OCT1_04 | 0.78398<br>2            | 1131 | (+) | NNNNNNNNWATGCAAATNNNW<br>NNW | ATTTAAATATTGATACTTCTCTA  |
| M00136 | V\$OCT1_02 | 0.77206<br>3            | 1133 | (+) | NNGAATATKCANNNN              | TTAAATATTGATACT          |
| M00162 | V\$OCT1_06 | 0.80703<br>1            | 1183 | (+) | CWNAWTKWSATRYN               | CAGGATCAAATGCT           |
| M00162 | V\$OCT1_06 | 0.84218<br>7            | 1184 | (-) | CWNAWTKWSATRYN               | AGGATCAAATGCTT           |
| M00138 | V\$OCT1_04 | NNNNNNNNWATGCAAATNNNW   | 1193 | (-) | NNW                          | TGCTTTACTTTGAAGTGTAGTAA  |
| M00162 | V\$OCT1_06 | 0.79151<br>0.83476<br>6 | 1216 | (+) | CWNAWTKWSATRYN               | GATATTGGTATTTT           |
| M00135 | V\$OCT1_01 | 0.77279<br>7            | 1242 | (+) | NNNNWTATGCAAATNTNNN          | AGCAGTAAGCAAAATAATT      |
| M00138 | V\$OCT1_04 | NNNNNNNNWATGCAAATNNNW   | 1251 | (-) | NNW                          | CAAAATAATTTGAATGGTAAATA  |
| M00162 | V\$OCT1_06 | 0.83187<br>0.83984<br>4 | 1255 | (+) | CWNAWTKWSATRYN               | ATAATTTGAATGGT           |

|        |            |                    |      |     |                                          |                          |
|--------|------------|--------------------|------|-----|------------------------------------------|--------------------------|
| M00195 | V\$OCT1_Q6 | 0.81905<br>0.80656 | 1255 | (-) | NNNNATGCAAATNAN<br>NNNNNNNNWATGCAAATNNNW | ATAATTTGAATGGTA          |
| M00138 | V\$OCT1_04 | 6<br>0.84396       | 1256 | (+) | NNW                                      | TAATTTGAATGGTAAATATTTAT  |
| M00248 | V\$OCT1_07 | 9<br>0.84396       | 1257 | (-) | TNTATGNTAATT                             | AATTTGAATGGT             |
| M00248 | V\$OCT1_07 | 9<br>0.81591       | 1261 | (+) | TNTATGNTAATT                             | TGAATGGTAAAT             |
| M00136 | V\$OCT1_02 | 8<br>0.86092       | 1264 | (-) | NNGAATATKCANNNN                          | ATGGTAAATATTTAT          |
| M00137 | V\$OCT1_03 | 5                  | 1264 | (+) | NNNRTAATNANNN<br>NNNNNNNNWATGCAAATNNNW   | ATGGTAAATATTT            |
| M00138 | V\$OCT1_04 | 0.80343<br>0.82647 | 1265 | (+) | NNW                                      | TGGTAAATATTTATATTGAAGAG  |
| M00136 | V\$OCT1_02 | 5<br>0.80156       | 1267 | (+) | NNGAATATKCANNNN                          | GTAAATATTTATATT          |
| M00162 | V\$OCT1_06 | 2<br>0.89414       | 1283 | (-) | CWNAWTKWSATRYN                           | AAGAGCAAAATTAG           |
| M00162 | V\$OCT1_06 | 1<br>0.80405       | 1288 | (+) | CWNAWTKWSATRYN<br>NNNNNNNNWATGCAAATNNNW  | CAAAATTAGAACT            |
| M00138 | V\$OCT1_04 | 7<br>0.79276       | 1296 | (+) | NNW<br>NNNNNNNNWATGCAAATNNNW             | GAACTAAATGAATAAAAAATATT  |
| M00138 | V\$OCT1_04 | 5<br>0.82891       | 1300 | (+) | NNW                                      | CTAAATGAATAAAAAATATTACTT |
| M00136 | V\$OCT1_02 | 2<br>0.83061       | 1301 | (-) | NNGAATATKCANNNN<br>NNNNNNNNWATGCAAATNNNW | TAAATGAATAAAAAAT         |
| M00138 | V\$OCT1_04 | 5<br>0.85736       | 1301 | (-) | NNW                                      | TAAATGAATAAAAAATATTACTTT |
| M00137 | V\$OCT1_03 | 9<br>0.86054       | 1305 | (+) | NNNRTAATNANNN                            | TGAATAAAAAATAT           |
| M00162 | V\$OCT1_06 | 7<br>0.78397       | 1305 | (-) | CWNAWTKWSATRYN                           | TGAATAAAAAATATT          |
| M00136 | V\$OCT1_02 | 4<br>0.81238       | 1307 | (-) | NNGAATATKCANNNN                          | AATAAAAAATATTACT         |
| M00248 | V\$OCT1_07 | 1<br>0.83671       | 1307 | (-) | TNTATGNTAATT                             | AATAAAAAATATT            |
| M00162 | V\$OCT1_06 | 9<br>0.82656       | 1312 | (+) | CWNAWTKWSATRYN                           | AAATATTACTTTCA           |
| M00162 | V\$OCT1_06 | 2<br>0.80859       | 1316 | (+) | CWNAWTKWSATRYN                           | ATTACTTTCAAATG           |
| M00162 | V\$OCT1_06 | 4<br>0.73674       | 1324 | (-) | CWNAWTKWSATRYN                           | CAAATGAAACAACT           |
| M00135 | V\$OCT1_01 | 2<br>0.81328       | 1333 | (-) | NNNNWTATGCAAATNTNNN                      | CAACTTTTATCATAATATA      |
| M00162 | V\$OCT1_06 | 1<br>0.78126       | 1365 | (-) | CWNAWTKWSATRYN                           | AAAATCAAGAATTT           |
| M00136 | V\$OCT1_02 | 7<br>0.85738       | 1368 | (-) | NNGAATATKCANNNN<br>NNNNNNNNWATGCAAATNNNW | ATCAAGAATTTTTTTT         |
| M00138 | V\$OCT1_04 | 2<br>0.82695       | 1372 | (-) | NNW                                      | AGAATTTTTTTTCATGAATCTAA  |
| M00162 | V\$OCT1_06 | 3<br>0.88906       | 1385 | (+) | CWNAWTKWSATRYN                           | ATGAATCTAATTTT           |
| M00162 | V\$OCT1_06 | 2<br>0.85781       | 1386 | (-) | CWNAWTKWSATRYN                           | TGAATCTAATTTTA           |
| M00162 | V\$OCT1_06 | 2<br>0.78941       | 1391 | (+) | CWNAWTKWSATRYN<br>NNNNNNNNWATGCAAATNNNW  | CTAATTTTATTATA           |
| M00138 | V\$OCT1_04 | 9<br>0.90833       | 1392 | (-) | NNW                                      | TAATTTTATTATAAGACCTATT   |
| M00137 | V\$OCT1_03 | 7<br>0.79181       | 1394 | (-) | NNNRTAATNANNN                            | ATTTTATTATAAG            |
| M00248 | V\$OCT1_07 | 7<br>0.79757       | 1408 | (+) | TNTATGNTAATT<br>NNNNNNNNWATGCAAATNNNW    | CCTATTTTATTT             |
| M00138 | V\$OCT1_04 | 4<br>0.85618       | 1413 | (-) | NNW                                      | TTTATTTTCTTACATAGATCTTG  |
| M00137 | V\$OCT1_03 | 3                  | 1452 | (-) | NNNRTAATNANNN                            | TCATCCTTACCTG            |

|        |            |                 |      |     |                                          |                         |
|--------|------------|-----------------|------|-----|------------------------------------------|-------------------------|
| M00162 | V\$OCT1_06 | 0.85<br>0.78481 | 1453 | (+) | CWNAWTKWSATRYN<br>NNNNNNNNWATGCAAATNNNW  | CATCCTTACCTGTC          |
| M00138 | V\$OCT1_04 | 8<br>0.82109    | 1493 | (+) | NNW                                      | GTGAGTACAGTAAAAAATTTAGA |
| M00162 | V\$OCT1_06 | 4<br>0.80937    | 1498 | (-) | CWNAWTKWSATRYN                           | TACAGTAAAAAAATT         |
| M00162 | V\$OCT1_06 | 5<br>0.78711    | 1501 | (-) | CWNAWTKWSATRYN<br>NNNNNNNNWATGCAAATNNNW  | AGTAAAAAATTTAG          |
| M00138 | V\$OCT1_04 | 8<br>0.80039    | 1503 | (-) | NNW                                      | TAAAAAATTTAGAAGATTCTAGA |
| M00162 | V\$OCT1_06 | 1<br>0.75085    | 1516 | (+) | CWNAWTKWSATRYN                           | AGATTCTAGATTCT          |
| M00135 | V\$OCT1_01 | 8<br>0.86835    | 1542 | (+) | NNNNWTATGCAAATNTNNN                      | TCTCAAATGCAATTTGATG     |
| M00162 | V\$OCT1_06 | 9<br>0.80761    | 1549 | (+) | CWNAWTKWSATRYN<br>NNNNNNNNWATGCAAATNNNW  | TGCAATTTGATGCA          |
| M00138 | V\$OCT1_04 | 2<br>0.75524    | 1550 | (+) | NNW                                      | GCAATTTGATGCAAGTCTCATCA |
| M00135 | V\$OCT1_01 | 6<br>0.89213    | 1552 | (+) | NNNNWTATGCAAATNTNNN                      | AATTTGATGCAAGTCTCAT     |
| M00137 | V\$OCT1_03 | 7<br>0.86835    | 1589 | (+) | NNNRTAATNANNN                            | GTCGTAAAGAATT           |
| M00162 | V\$OCT1_06 | 9<br>0.81640    | 1595 | (+) | CWNAWTKWSATRYN                           | AAGAATTTGATGGT          |
| M00162 | V\$OCT1_06 | 6<br>0.81367    | 1596 | (-) | CWNAWTKWSATRYN                           | AGAATTTGATGGTC          |
| M00162 | V\$OCT1_06 | 2<br>0.82148    | 1632 | (-) | CWNAWTKWSATRYN                           | GATATTAAAGCTAT          |
| M00162 | V\$OCT1_06 | 4<br>0.81277    | 1650 | (+) | CWNAWTKWSATRYN                           | ATCCTTCACATTTT          |
| M00195 | V\$OCT1_Q6 | 3<br>0.81718    | 1650 | (-) | NNNNATGCAAATNAN                          | ATCCTTCACATTTTG         |
| M00162 | V\$OCT1_06 | 7<br>0.79130    | 1651 | (-) | CWNAWTKWSATRYN<br>NNNNNNNNWATGCAAATNNNW  | TCCTTCACATTTTG          |
| M00138 | V\$OCT1_04 | 1<br>0.80976    | 1652 | (-) | NNW                                      | CCTTCACATTTTGATCATTATTA |
| M00162 | V\$OCT1_06 | 6<br>0.78941    | 1656 | (+) | CWNAWTKWSATRYN<br>NNNNNNNNWATGCAAATNNNW  | CACATTTTGATCAT          |
| M00138 | V\$OCT1_04 | 9<br>0.88818    | 1660 | (+) | NNW                                      | TTTGATCATTATTATTTAGTTT  |
| M00137 | V\$OCT1_03 | 6<br>0.89845    | 1663 | (-) | NNNRTAATNANNN                            | TGATCATTATTAT           |
| M00137 | V\$OCT1_03 | 9<br>0.78153    | 1666 | (-) | NNNRTAATNANNN                            | TCATTATTATTTA           |
| M00136 | V\$OCT1_02 | 8<br>0.79297    | 1668 | (+) | NNGAATATKCANNNN<br>NNNNNNNNWATGCAAATNNNW | ATTATTATTTAGTTT         |
| M00138 | V\$OCT1_04 | 4<br>0.74895    | 1675 | (+) | NNW                                      | TTTAGTTTATTCAAAGACTTAAC |
| M00135 | V\$OCT1_01 | 1<br>0.80671    | 1677 | (+) | NNNNWTATGCAAATNTNNN                      | TAGTTTATTCAAAGACTTA     |
| M00136 | V\$OCT1_02 | 4<br>0.79039    | 1677 | (+) | NNGAATATKCANNNN                          | TAGTTTATTCAAAGA         |
| M00195 | V\$OCT1_Q6 | 3<br>0.86093    | 1679 | (+) | NNNNATGCAAATNAN                          | GTTTATTCAAAGACT         |
| M00162 | V\$OCT1_06 | 7<br>0.84765    | 1699 | (+) | CWNAWTKWSATRYN                           | CTAAATAAAATTTCT         |
| M00162 | V\$OCT1_06 | 6<br>0.79527    | 1700 | (-) | CWNAWTKWSATRYN<br>NNNNNNNNWATGCAAATNNNW  | TAAATAAAATTTCT          |
| M00138 | V\$OCT1_04 | 4<br>0.79464    | 1708 | (+) | NNW<br>NNNNNNNNWATGCAAATNNNW             | ATTCTAACTTAAATATAAACA   |
| M00138 | V\$OCT1_04 | 7<br>0.83167    | 1709 | (-) | NNW                                      | TTTCTAACTTAAATATAAACAC  |
| M00248 | V\$OCT1_07 | 3<br>0.86013    | 1715 | (-) | TNTATGNTAATT                             | ACTTAAATATA             |
| M00137 | V\$OCT1_03 | 4               | 1732 | (+) | NNNRTAATNANNN                            | CTCACAATAAAAA           |

|        |            |                 |      |                              |                              |                         |
|--------|------------|-----------------|------|------------------------------|------------------------------|-------------------------|
| M00162 | V\$OCT1_06 | 0.80820<br>3    | 1734 | (-)                          | CWNAWTKWSATRYN               | CACAATAAAAAAATT         |
| M00138 | V\$OCT1_04 | 0.84713<br>5    | 1737 | (+)                          | NNNNNNNNWATGCAAATNNNW<br>NNW | AATAAAAAATTAAAAATTAAAAA |
| M00138 | V\$OCT1_04 | 0.79715<br>6    | 1738 | (+)                          | NNNNNNNNWATGCAAATNNNW<br>NNW | ATAAAAAATTAAAAATTAAAAAA |
| M00162 | V\$OCT1_06 | 0.85507<br>8    | 1741 | (+)                          | CWNAWTKWSATRYN               | AAAAATTAAAAAATT         |
| M00162 | V\$OCT1_06 | 0.80820<br>3    | 1741 | (-)                          | CWNAWTKWSATRYN               | AAAAATTAAAAAATT         |
| M00162 | V\$OCT1_06 | 0.83437<br>5    | 1742 | (-)                          | CWNAWTKWSATRYN               | AAAATTAAAAATTA          |
| M00138 | V\$OCT1_04 | 0.83082<br>4    | 1744 | (+)                          | NNNNNNNNWATGCAAATNNNW<br>NNW | AATTAAAAATTAAAAAAGAAATA |
| M00162 | V\$OCT1_06 | 0.82656<br>2    | 1748 | (-)                          | CWNAWTKWSATRYN               | AAAAATTAAAAAAG          |
| M00248 | V\$OCT1_07 | 0.83654<br>9    | 1751 | (-)                          | TNTATGNTAATT                 | AATTAAAAAAGA            |
| M00135 | V\$OCT1_01 | 0.75562<br>8    | 1760 | (+)                          | NNNNWTATGCAAATNTNNN          | AGAAATAAGGTAATTAACA     |
| M00248 | V\$OCT1_07 | 0.87386<br>1    | 1763 | (+)                          | TNTATGNTAATT                 | AATAAGGTAATT            |
| M00137 | V\$OCT1_03 | 0.84472<br>5    | 1766 | (+)                          | NNNRTAATNANNN                | AAGGTAATTAACA           |
| M00248 | V\$OCT1_07 | 0.80326<br>5    | 1771 | (-)                          | TNTATGNTAATT                 | AATTAACAATAC            |
| M00162 | V\$OCT1_06 | 0.86054<br>7    | 1790 | (-)                          | CWNAWTKWSATRYN               | AGCATCAAAGAAGG          |
| M00137 | V\$OCT1_03 | 0.87001<br>2    | 1800 | (+)                          | NNNRTAATNANNN                | AAGGTAATTAGTC           |
| M00138 | V\$OCT1_04 | 0.81848<br>6    | 1829 | (-)                          | NNNNNNNNWATGCAAATNNNW<br>NNW | TTATAGGCTTAACATATTTGTAA |
| M00135 | V\$OCT1_01 | 0.77699<br>4    | 1831 | (-)                          | NNNNWTATGCAAATNTNNN          | ATAGGCTTAACATATTTGT     |
| M00161 | V\$OCT1_05 | 0.87365<br>1    | 1833 | (+)                          | MKNATTTGCATAYY               | AGGCTTAACATATT          |
| M00162 | V\$OCT1_06 | 0.82148<br>4    | 1833 | (+)                          | CWNAWTKWSATRYN               | AGGCTTAACATATT          |
| M00195 | V\$OCT1_Q6 | 0.82614<br>6    | 1833 | (-)                          | NNNNATGCAAATNAN              | AGGCTTAACATATTT         |
| M00138 | V\$OCT1_04 | 0.79506<br>5    | 1837 | (-)                          | NNNNNNNNWATGCAAATNNNW<br>NNW | TTAACATATTTGTAAACATATAT |
| M00138 | V\$OCT1_04 | 0.78084<br>5    | 1838 | (+)                          | NNNNNNNNWATGCAAATNNNW<br>NNW | TAACATATTTGTAAACATATATA |
| M00135 | V\$OCT1_01 | 0.75944<br>3    | 1839 | (-)                          | NNNNWTATGCAAATNTNNN          | AACATATTTGTAAACATAT     |
| M00138 | V\$OCT1_04 | 0.79213<br>7    | 1841 | (-)                          | NNNNNNNNWATGCAAATNNNW<br>NNW | CATATTTGTAAACATATATATGT |
| M00137 | V\$OCT1_03 | 0.88897<br>7    | 1845 | (+)                          | NNNRTAATNANNN                | TTTGTAAACATAT           |
| M00138 | V\$OCT1_04 | 0.82141<br>4    | 1847 | (-)                          | NNNNNNNNWATGCAAATNNNW<br>NNW | TGTAAACATATATATGTTCAATT |
| M00135 | V\$OCT1_01 | 0.74112<br>9    | 1854 | (+)                          | NNNNWTATGCAAATNTNNN          | ATATATATGTTCAATTTTG     |
| M00248 | V\$OCT1_07 | 0.79245<br>3    | 1857 | (+)                          | TNTATGNTAATT                 | TATATGTTCAAT            |
| M00162 | V\$OCT1_06 | 0.86054<br>7    | 1859 | (-)                          | CWNAWTKWSATRYN               | TATGTTCAATTTTG          |
| M00138 | V\$OCT1_04 | 0.85299<br>1861 | (-)  | NNNNNNNNWATGCAAATNNNW<br>NNW | TGTTCAATTTTGTATTACCAAAT      |                         |
| M00135 | V\$OCT1_01 | 0.75028<br>6    | 1863 | (-)                          | NNNNWTATGCAAATNTNNN          | TTCAATTTTGTATTACCAA     |
| M00162 | V\$OCT1_06 | 0.80039<br>1    | 1866 | (+)                          | CWNAWTKWSATRYN               | AATTTTGTATTACC          |
| M00135 | V\$OCT1_01 | 0.73884<br>1869 | (-)  | NNNNWTATGCAAATNTNNN          | TTTGTATTACCAAATATAC          |                         |



|        |            |                 |      |                             |                             |                         |
|--------|------------|-----------------|------|-----------------------------|-----------------------------|-------------------------|
| M00248 | V\$OCT1_07 | 0.79520<br>9    | 1873 | (-)                         | TNTATGNTAATT                | TATTACCAAATA            |
| M00162 | V\$OCT1_06 | 0.85703<br>1    | 1961 | (+)                         | CWNAWTKWSATRYN              | ATCCCTGGGATTCT          |
| M00162 | V\$OCT1_06 | 0.81953<br>1    | 2017 | (-)                         | CWNAWTKWSATRYN              | TGCATGAAATCAAA          |
| M00162 | V\$OCT1_06 | 0.90390<br>6    | 2022 | (-)                         | CWNAWTKWSATRYN              | GAAATCAAAAAGTG          |
| M00162 | V\$OCT1_06 | 0.80898<br>4    | 2035 | (-)                         | CWNAWTKWSATRYN              | GAAATTGAAGTCTC          |
| M00162 | V\$OCT1_06 | 0.82148<br>4    | 2073 | (+)                         | CWNAWTKWSATRYN              | CTCCATGGACTGCA          |
| M00162 | V\$OCT1_06 | 0.87773<br>4    | 2104 | (+)                         | CWNAWTKWSATRYN              | ATCCATGGGATTTT          |
| M00195 | V\$OCT1_Q6 | 0.79503<br>3    | 2162 | (+)                         | NNNNATGCAAATNAN             | AAATATACTATTAAG         |
| M00162 | V\$OCT1_06 | 0.80976<br>6    | 2163 | (-)                         | CWNAWTKWSATRYN              | AATATACTATTAAG          |
| M00162 | V\$OCT1_06 | 0.87343<br>7    | 2190 | (-)                         | CWNAWTKWSATRYN              | TGTATCCACTTTTG          |
| M00162 | V\$OCT1_06 | 0.84765<br>6    | 2209 | (-)                         | CWNAWTKWSATRYN              | TAAATCAAACCTCTC         |
| M00162 | V\$OCT1_06 | 0.86093<br>7    | 2214 | (+)                         | CWNAWTKWSATRYN              | CAAACCTCATTG            |
| M00162 | V\$OCT1_06 | 0.86289<br>1    | 2291 | (-)                         | CWNAWTKWSATRYN              | AAGATCTAATAATT          |
| M00137 | V\$OCT1_03 | 0.85499<br>8    | 2293 | (+)                         | NNNRTAATNANNN               | GATCTAATAATTT           |
| M00137 | V\$OCT1_03 | 0.88660<br>6    | 2296 | (+)                         | NNNRTAATNANNN               | CTAATAATTGGT            |
| M00138 | V\$OCT1_04 | 0.83124<br>2    | 2325 | (+)                         | NNNNNNNWATGCAAATNNNW<br>NNW | ACTAGATAATGTAAAGTAACTTA |
| M00137 | V\$OCT1_03 | 0.85420<br>8    | 2327 | (+)                         | NNNRTAATNANNN               | TAGATAATGTAAA           |
| M00162 | V\$OCT1_06 | 0.85507<br>8    | 2329 | (+)                         | CWNAWTKWSATRYN              | GATAATGTAAAGTA          |
| M00195 | V\$OCT1_Q6 | 0.83651<br>7    | 2329 | (+)                         | NNNNATGCAAATNAN             | GATAATGTAAAGTAA         |
| M00248 | V\$OCT1_07 | 0.79308<br>9    | 2330 | (+)                         | TNTATGNTAATT                | ATAATGTAAAGT            |
| M00162 | V\$OCT1_06 | 0.80078<br>1    | 2340 | (+)                         | CWNAWTKWSATRYN              | GTAACCTAAGTTTC          |
| M00162 | V\$OCT1_06 | 0.85273<br>4    | 2360 | (-)                         | CWNAWTKWSATRYN              | AAAAACAAATTCAG          |
| M00136 | V\$OCT1_02 | 0.78668<br>1    | 2362 | (+)                         | NNGAATATKCANNNN             | AAACAAATTCAGTTA         |
| M00162 | V\$OCT1_06 | 0.80937<br>5    | 2365 | (+)                         | CWNAWTKWSATRYN              | CAAATTCAGTTATT          |
| M00162 | V\$OCT1_06 | 0.80859<br>4    | 2365 | (-)                         | CWNAWTKWSATRYN              | CAAATTCAGTTATT          |
| M00162 | V\$OCT1_06 | 0.82148<br>4    | 2371 | (+)                         | CWNAWTKWSATRYN              | CAGTTATTAATGTG          |
| M00162 | V\$OCT1_06 | 0.85234<br>4    | 2376 | (+)                         | CWNAWTKWSATRYN              | ATTAATGTGAAACA          |
| M00162 | V\$OCT1_06 | 0.80039<br>1    | 2383 | (-)                         | CWNAWTKWSATRYN              | TGAAACAAAAAGTT          |
| M00162 | V\$OCT1_06 | 0.80429<br>7    | 2388 | (+)                         | CWNAWTKWSATRYN              | CAAAAAGTTATTCT          |
| M00138 | V\$OCT1_04 | 0.84295<br>3    | 2416 | (+)                         | NNNNNNNWATGCAAATNNNW<br>NNW | TCTAGATAATGATAAATAAATAA |
| M00137 | V\$OCT1_03 | 0.93046<br>2    | 2418 | (+)                         | NNNRTAATNANNN               | TAGATAATGATAA           |
| M00138 | V\$OCT1_04 | 0.79464<br>7    | 2418 | (-)                         | NNNNNNNWATGCAAATNNNW<br>NNW | TAGATAATGATAAATAAATAAAT |
| M00138 | V\$OCT1_04 | 0.79151<br>2419 | (+)  | NNNNNNNWATGCAAATNNNW<br>NNW | AGATAATGATAAATAAATAAATA     |                         |

|        |            |                 |      |                |                       |                         |
|--------|------------|-----------------|------|----------------|-----------------------|-------------------------|
| M00137 | V\$OCT1_03 | 0.84630<br>6    | 2424 | (+)            | NNNRTAATNANNN         | ATGATAAATAAAT           |
| M00137 | V\$OCT1_03 | 0.85578<br>8    | 2432 | (+)            | NNNRTAATNANNN         | TAAATAAATAGGA           |
| M00195 | V\$OCT1_Q6 | 0.79284<br>9    | 2455 | (+)            | NNNNATGCAAATNAN       | AAGAAAGCAATTCAA         |
| M00138 | V\$OCT1_04 | 0.82266<br>8    | 2456 | (+)            | NNNNNNNNWATGCAAATNNNW | AGAAAGCAATTCAAATAAGATAA |
| M00195 | V\$OCT1_Q6 | 0.87145<br>2    | 2460 | (+)            | NNNNATGCAAATNAN       | AGCAATTCAAATAAG         |
| M00162 | V\$OCT1_06 | 0.83242<br>2    | 2461 | (-)            | CWNAWTKWSATRYN        | GCAATTCAAATAAG          |
| M00248 | V\$OCT1_07 | 0.79266<br>5    | 2463 | (-)            | TNTATGNTAATT          | AATTCAAATAAG            |
| M00138 | V\$OCT1_04 | 0.79924<br>7    | 2476 | (+)            | NNNNNNNNWATGCAAATNNNW | TAATAGTTTGGATATTTGGACA  |
| M00135 | V\$OCT1_01 | 0.79587<br>9    | 2477 | (-)            | NNNNWTATGCAAATNTNNN   | AATAGTTTTGGATATTTGG     |
| M00162 | V\$OCT1_06 | 0.83437<br>5    | 2479 | (+)            | CWNAWTKWSATRYN        | TAGTTTTGGATATT          |
| M00136 | V\$OCT1_02 | 0.79182<br>5    | 2481 | (-)            | NNGAATATKCANNNN       | GTTTTGGATATTTGG         |
| M00135 | V\$OCT1_01 | 0.78634<br>1    | 2485 | (-)            | NNNNWTATGCAAATNTNNN   | TGGATATTTGGACACTCAA     |
| M00162 | V\$OCT1_06 | 0.83945<br>3    | 2487 | (+)            | CWNAWTKWSATRYN        | GATATTTGGACACT          |
| M00162 | V\$OCT1_06 | 0.80859<br>4    | 2503 | (+)            | CWNAWTKWSATRYN        | AGCTATCAAATATA          |
| M00162 | V\$OCT1_06 | 0.85273<br>4    | 2504 | (-)            | CWNAWTKWSATRYN        | GCTATCAAATATAG          |
| M00162 | V\$OCT1_06 | 0.89414<br>1    | 2509 | (+)            | CWNAWTKWSATRYN        | CAAATATAGATGCA          |
| M00138 | V\$OCT1_04 | 0.84086<br>2    | 2510 | (+)            | NNNNNNNNWATGCAAATNNNW | AAATATAGATGCAAAAGTTTCTG |
| M00135 | V\$OCT1_01 | 0.79645<br>2    | 2512 | (+)            | NNNNWTATGCAAATNTNNN   | ATATAGATGCAAAAGTTTC     |
| M00162 | V\$OCT1_06 | 0.82929<br>7    | 2515 | (-)            | CWNAWTKWSATRYN        | TAGATGCAAAAGTT          |
| M00162 | V\$OCT1_06 | 0.89843<br>7    | 2526 | (+)            | CWNAWTKWSATRYN        | GTTTCTGAAATGCT          |
| M00162 | V\$OCT1_06 | 0.85507<br>8    | 2534 | (+)            | CWNAWTKWSATRYN        | AATGCTGAGATATT          |
| M00135 | V\$OCT1_01 | 0.73826<br>8    | 2539 | (+)            | NNNNWTATGCAAATNTNNN   | TGAGATATTCTATTGTAA      |
| M00162 | V\$OCT1_06 | 0.82187<br>5    | 2542 | (-)            | CWNAWTKWSATRYN        | GATATTCTATTGTT          |
| M00162 | V\$OCT1_06 | 0.83437<br>5    | 2571 | (-)            | CWNAWTKWSATRYN        | AAAGTGTAAGTAAT          |
| M00162 | V\$OCT1_06 | 0.80820<br>3    | 2574 | (+)            | CWNAWTKWSATRYN        | GTGTAAGTAATGTA          |
| M00162 | V\$OCT1_06 | 0.86796<br>9    | 2575 | (-)            | CWNAWTKWSATRYN        | TGTAAGTAATGTAG          |
| M00195 | V\$OCT1_Q6 | 0.79012<br>8    | 2643 | (+)            | NNNNATGCAAATNAN       | AAGCATCAAAAGAAG         |
| M00162 | V\$OCT1_06 | 0.94257<br>8    | 2644 | (-)            | CWNAWTKWSATRYN        | AGCATCAAAAGAAG          |
| M00162 | V\$OCT1_06 | 0.80859<br>4    | 2652 | (+)            | CWNAWTKWSATRYN        | AAGAAGGGAATATC          |
| M00162 | V\$OCT1_06 | 0.86562<br>5    | 2662 | (-)            | CWNAWTKWSATRYN        | TATCTGACAGTAAG          |
| M00162 | V\$OCT1_06 | 0.82148<br>4    | 2775 | (+)            | CWNAWTKWSATRYN        | GATTCTTTAATCCT          |
| M00138 | V\$OCT1_04 | 0.80092<br>2801 | (-)  | NNNW           | NNNNNNNNWATGCAAATNNNW | ACATCATTTTTTAATGCTAACAT |
| M00162 | V\$OCT1_06 | 0.9375<br>2805  | (+)  | CWNAWTKWSATRYN |                       | CATTTTTTAATGCT          |

|        |            |                |      |                              |                              |                         |
|--------|------------|----------------|------|------------------------------|------------------------------|-------------------------|
| M00135 | V\$OCT1_01 | 0.74685<br>2   | 2808 | (+)                          | NNNNWTATGCAAATNTNNN          | TTTTAATGCTAACATTTA      |
| M00162 | V\$OCT1_06 | 0.84218<br>7   | 2819 | (-)                          | CWNAWTKWSATRYN               | AACATTTAACAAAC          |
| M00138 | V\$OCT1_04 | 0.80280<br>2   | 2820 | (-)                          | NNNNNNNNWATGCAAATNNNW<br>NNW | ACATTTAACAAACATAAATCTTG |
| M00248 | V\$OCT1_07 | 0.79732<br>9   | 2822 | (-)                          | TNTATGNTAATT                 | ATTTAACAAACA            |
| M00248 | V\$OCT1_07 | 0.79245<br>3   | 2826 | (-)                          | TNTATGNTAATT                 | AACAAACATAAA            |
| M00138 | V\$OCT1_04 | 0.81534<br>9   | 2849 | (+)                          | NNNNNNNNWATGCAAATNNNW<br>NNW | CAGTTAAAATGCAGATTGAGTTA |
| M00135 | V\$OCT1_01 | 0.75829<br>8   | 2851 | (+)                          | NNNNWTATGCAAATNTNNN          | GTAAAAATGCAGATTGAGT     |
| M00136 | V\$OCT1_02 | 0.84298<br>9   | 2851 | (+)                          | NNGAATATKCANNNN              | GTAAAAATGCAGATT         |
| M00136 | V\$OCT1_02 | 0.80265<br>3   | 2854 | (-)                          | NNGAATATKCANNNN              | AAAATGCAGATTGAG         |
| M00248 | V\$OCT1_07 | 0.79987<br>3   | 2854 | (+)                          | TNTATGNTAATT                 | AAAATGCAGATT            |
| M00138 | V\$OCT1_04 | 0.79088<br>2   | 2859 | (+)                          | NNNNNNNNWATGCAAATNNNW<br>NNW | GCAGATTGAGTTAAAATTTTATA |
| M00162 | V\$OCT1_06 | 0.82656<br>2   | 2865 | (-)                          | CWNAWTKWSATRYN               | TGAGTTAAAATTTT          |
| M00138 | V\$OCT1_04 | 0.79736<br>5   | 2868 | (-)                          | NNNNNNNNWATGCAAATNNNW<br>NNW | GTAAAAATTTTATATAATTTAAT |
| M00135 | V\$OCT1_01 | 0.75486<br>5   | 2870 | (-)                          | NNNNWTATGCAAATNTNNN          | TAAAATTTTATATAATTTA     |
| M00162 | V\$OCT1_06 | 0.825<br>2870  | (+)  | CWNAWTKWSATRYN               | TAAAATTTTATATA               |                         |
| M00162 | V\$OCT1_06 | 0.86835<br>9   | 2880 | (+)                          | CWNAWTKWSATRYN               | TATAATTTAATTTA          |
| M00248 | V\$OCT1_07 | 0.83167<br>3   | 2880 | (+)                          | TNTATGNTAATT                 | TATAATTTAATT            |
| M00138 | V\$OCT1_04 | 0.78711<br>8   | 2881 | (+)                          | NNNNNNNNWATGCAAATNNNW<br>NNW | ATAATTTAATTTATGATAAAAAA |
| M00162 | V\$OCT1_06 | 0.84765<br>6   | 2881 | (-)                          | CWNAWTKWSATRYN               | ATAATTTAATTTAT          |
| M00138 | V\$OCT1_04 | 0.78105<br>4   | 2883 | (-)                          | NNNNNNNNWATGCAAATNNNW<br>NNW | AATTTAATTTATGATAAAAAATA |
| M00138 | V\$OCT1_04 | 0.84776<br>2   | 2885 | (+)                          | NNNNNNNNWATGCAAATNNNW<br>NNW | TTTAATTTATGATAAAAAATAAA |
| M00136 | V\$OCT1_02 | 0.77666<br>5   | 2902 | (+)                          | NNGAATATKCANNNN              | AATAAAATCCAGACA         |
| M00136 | V\$OCT1_02 | 0.77585<br>3   | 2917 | (+)                          | NNGAATATKCANNNN              | AACAATATTTTCAGAT        |
| M00162 | V\$OCT1_06 | 0.86796<br>9   | 2919 | (+)                          | CWNAWTKWSATRYN               | CAATATTTTCAGATT         |
| M00162 | V\$OCT1_06 | 0.84218<br>7   | 2920 | (-)                          | CWNAWTKWSATRYN               | AATATTTTCAGATTA         |
| M00137 | V\$OCT1_03 | 0.84551<br>6   | 2925 | (-)                          | NNNRTAATNANNN                | TTCAGATTATTTT           |
| M00138 | V\$OCT1_04 | 0.80029<br>3   | 2935 | (-)                          | NNNNNNNNWATGCAAATNNNW<br>NNW | TTTTGTCTTTTATATTTTCTC   |
| M00162 | V\$OCT1_06 | 0.83437<br>5   | 2978 | (+)                          | CWNAWTKWSATRYN               | GATAATTTACTTTT          |
| M00162 | V\$OCT1_06 | 0.83437<br>5   | 2979 | (+)                          | CWNAWTKWSATRYN               | ATAATTTACTTTTC          |
| M00195 | V\$OCT1_Q6 | 0.84033<br>8   | 2979 | (-)                          | NNNNATGCAAATNAN              | ATAATTTACTTTTCT         |
| M00138 | V\$OCT1_04 | 0.7844<br>2993 | (+)  | NNNNNNNNWATGCAAATNNNW<br>NNW | TTTTATTTTGTCAATAAATTTT       |                         |
| M00162 | V\$OCT1_06 | 0.86562<br>5   | 3038 | (-)                          | CWNAWTKWSATRYN               | GGTGTCAAATTTAG          |
| M00162 | V\$OCT1_06 | 0.81718<br>7   | 3043 | (+)                          | CWNAWTKWSATRYN               | CAAATTTAGCTCTT          |

|        |            |                    |      |     |                                           |                         |
|--------|------------|--------------------|------|-----|-------------------------------------------|-------------------------|
| M00162 | V\$OCT1_06 | 0.86484<br>4       | 3050 | (+) | CWNAWTKWSATRYN                            | AGCTCTTAAATACA          |
| M00162 | V\$OCT1_06 | 0.80390<br>6       | 3054 | (+) | CWNAWTKWSATRYN                            | CTTAAATACAAACT          |
| M00162 | V\$OCT1_06 | 0.94023<br>4       | 3078 | (+) | CWNAWTKWSATRYN                            | CACTATTAAATGTA          |
| M00138 | V\$OCT1_04 | 0.84943<br>5       | 3079 | (+) | NNNNNNNNWATGCAAATNNNW<br>NNW              | ACTATTAAATGTATAATATTACA |
| M00162 | V\$OCT1_06 | 0.82656<br>2       | 3079 | (-) | CWNAWTKWSATRYN                            | ACTATTAAATGTAT          |
| M00136 | V\$OCT1_02 | 0.78884<br>7       | 3084 | (-) | NNGAATATKCANNNN                           | TAAATGTATAATATT         |
| M00162 | V\$OCT1_06 | 0.82109<br>4       | 3084 | (-) | CWNAWTKWSATRYN                            | TAAATGTATAATAT          |
| M00137 | V\$OCT1_03 | 0.85736<br>9       | 3091 | (-) | NNNRTAATNANNN                             | ATAATATTACATG           |
| M00162 | V\$OCT1_06 | 0.87851<br>6       | 3092 | (+) | CWNAWTKWSATRYN                            | TAATATTACATGTG          |
| M00162 | V\$OCT1_06 | 0.83437<br>5       | 3093 | (-) | CWNAWTKWSATRYN                            | AATATTACATGTGC          |
| M00162 | V\$OCT1_06 | 0.82656<br>2       | 3104 | (+) | CWNAWTKWSATRYN                            | TGCCTTGATATT            |
| M00138 | V\$OCT1_04 | 0.80489<br>3       | 3108 | (-) | NNNNNNNNWATGCAAATNNNW<br>NNW              | TTGTGATATTATTATTATTGTAT |
| M00138 | V\$OCT1_04 | 0.79171<br>9       | 3111 | (-) | NNNNNNNNWATGCAAATNNNW<br>NNW              | TGATATTATTATTATTGTATTTT |
| M00137 | V\$OCT1_03 | 0.90636<br>1       | 3113 | (-) | NNNRTAATNANNN                             | ATATTATTATTAT           |
| M00138 | V\$OCT1_04 | 0.79109<br>2       | 3113 | (+) | NNNNNNNNWATGCAAATNNNW<br>NNW              | ATATTATTATTATTGTATTTTGA |
| M00137 | V\$OCT1_03 | 0.87356<br>8       | 3116 | (-) | NNNRTAATNANNN                             | TTATTATTATTGT           |
| M00162 | V\$OCT1_06 | 0.80585<br>9       | 3121 | (+) | CWNAWTKWSATRYN                            | ATTATTGTATTTTG          |
| M00248 | V\$OCT1_07 | 0.81513<br>7       | 3121 | (+) | TNTATGNTAATT                              | ATTATTGTATTT            |
| M00138 | V\$OCT1_04 | 0.80552<br>1       | 3123 | (-) | NNNNNNNNWATGCAAATNNNW<br>NNW              | TATTGTATTTTGAGTGCTTTTGT |
| M00162 | V\$OCT1_06 | 0.80039<br>1       | 3127 | (+) | CWNAWTKWSATRYN                            | GTATTTTGAGTGCT          |
| M00138 | V\$OCT1_04 | 0.80092<br>0.74608 | 3148 | (-) | NNNNNNNNWATGCAAATNNNW<br>NNW              | TTACAGTCTTGCATTTTTTTTT  |
| M00135 | V\$OCT1_01 | 0.86484<br>9       | 3150 | (-) | NNNNWTATGCAAATNTNNN                       | ACAGTCTTGCATTTTTTT      |
| M00162 | V\$OCT1_06 | 0.85056<br>4       | 3152 | (+) | CWNAWTKWSATRYN                            | AGTTCCTGCATTTT          |
| M00136 | V\$OCT1_02 | 0.81430<br>8       | 3154 | (-) | NNGAATATKCANNNN                           | TTCTTGCATTTTTTT         |
| M00138 | V\$OCT1_04 | 0.80429<br>4       | 3162 | (-) | NNNNNNNNWATGCAAATNNNW<br>NNW              | TTTTTTTTTAACAGAAACATCC  |
| M00162 | V\$OCT1_06 | 0.82496<br>7       | 3178 | (-) | CWNAWTKWSATRYN                            | AACATCCTATCAAG          |
| M00138 | V\$OCT1_04 | 0.73845<br>9       | 3265 | (+) | NNNNNNNNWATGCAAATNNNW<br>NNW              | ATGATAAATTGCTAATATATAGA |
| M00135 | V\$OCT1_01 | 0.84037<br>9       | 3267 | (+) | NNNNWTATGCAAATNTNNN                       | GATAAATTGCTAATATATA     |
| M00137 | V\$OCT1_03 | 0.77585<br>9       | 3341 | (+) | NNNRTAATNANNN                             | GGTATAATATCTT           |
| M00136 | V\$OCT1_02 | 3                  | 3362 | (-) | NNGAATATKCANNNN                           | GAGCTGACTATTGAT         |
| M00195 | V\$OCT1_Q6 | 0.80131<br>0.79025 | 3406 | (-) | NNNNNATGCAAATNAN<br>NNNNNNNNWATGCAAATNNNW | GGCATTTGGACTTAC         |
| M00138 | V\$OCT1_04 | 0.87791<br>5       | 3408 | (-) | NNW                                       | CATTTGGACTTACGTATTTATGA |
| M00137 | V\$OCT1_03 | 4                  | 3419 | (-) | NNNRTAATNANNN                             | ACGTATTTATGAT           |

|        |            |                    |      |     |                                              |                          |
|--------|------------|--------------------|------|-----|----------------------------------------------|--------------------------|
| M00138 | V\$OCT1_04 | 0.84232<br>5       | 3419 | (+) | NNNNNNNNWATGCAAATNNNW<br>NNW                 | ACGTATTTATGATTAATAAAAAAT |
| M00138 | V\$OCT1_04 | 0.78523<br>6       | 3422 | (+) | NNNNNNNNWATGCAAATNNNW<br>NNW                 | TATTTATGATTAATAAAAAATTTT |
| M00137 | V\$OCT1_03 | 0.87080<br>2       | 3425 | (-) | NNNRTAATNANNN<br>NNNNNNNNWATGCAAATNNNW       | TTATGATTAATAA            |
| M00138 | V\$OCT1_04 | 0.82936<br>0.81974 | 3426 | (+) | NNW<br>NNNNNNNNWATGCAAATNNNW                 | TATGATTAATAAAAAATTTTATTA |
| M00138 | V\$OCT1_04 | 1<br>0.85104       | 3427 | (-) | NNW<br>NNNNNNNNWATGCAAATNNNW                 | ATGATTAATAAAAAATTTTATTAT |
| M00137 | V\$OCT1_03 | 7<br>0.82656       | 3431 | (+) | NNNRTAATNANNN                                | TTAATAAAAAATTT           |
| M00162 | V\$OCT1_06 | 2<br>0.88164       | 3437 | (+) | CWNAWTKWSATRYN                               | AAAATTTTATTATG           |
| M00162 | V\$OCT1_06 | 1<br>0.80029       | 3437 | (-) | CWNAWTKWSATRYN<br>NNNNNNNNWATGCAAATNNNW      | AAAATTTTATTATG           |
| M00138 | V\$OCT1_04 | 3                  | 3439 | (-) | NNW                                          | AATTTTATTATGCAAGAGCAATA  |
| M00137 | V\$OCT1_03 | 0.92098<br>0.80677 | 3440 | (-) | NNNRTAATNANNN<br>NNNNNNNNWATGCAAATNNNW       | ATTTTATTATGCA            |
| M00138 | V\$OCT1_04 | 5<br>0.79282       | 3440 | (+) | NNW                                          | ATTTTATTATGCAAGAGCAATAG  |
| M00135 | V\$OCT1_01 | 7<br>0.83811       | 3442 | (+) | NNNNWTATGCAAATNTNNN                          | TTTATTATGCAAGAGCAAT      |
| M00136 | V\$OCT1_02 | 6<br>0.83437       | 3442 | (+) | NNGAATATKCANNNN                              | TTTATTATGCAAGAG          |
| M00162 | V\$OCT1_06 | 5<br>0.80664       | 3457 | (+) | CWNAWTKWSATRYN                               | CAATAGTTAATTCA           |
| M00162 | V\$OCT1_06 | 1<br>0.80677       | 3469 | (+) | CWNAWTKWSATRYN<br>NNNNNNNNWATGCAAATNNNW      | CAATAGGATATGTA           |
| M00138 | V\$OCT1_04 | 5<br>0.73407       | 3470 | (+) | NNW                                          | AATAGGATATGTATATGTGGTCT  |
| M00135 | V\$OCT1_01 | 1                  | 3471 | (-) | NNNNWTATGCAAATNTNNN                          | ATAGGATATGTATATGTGG      |
| M00135 | V\$OCT1_01 | 0.78367<br>0.78965 | 3472 | (+) | NNNNWTATGCAAATNTNNN                          | TAGGATATGTATATGTGGT      |
| M00136 | V\$OCT1_02 | 9<br>0.86835       | 3472 | (+) | NNGAATATKCANNNN                              | TAGGATATGTATATG          |
| M00162 | V\$OCT1_06 | 9<br>0.74208       | 3475 | (-) | CWNAWTKWSATRYN                               | GATATGTATATGTG           |
| M00135 | V\$OCT1_01 | 3<br>0.79297       | 3488 | (-) | NNNNWTATGCAAATNTNNN<br>NNNNNNNNWATGCAAATNNNW | GGTCTATTTTCATGTATTA      |
| M00138 | V\$OCT1_04 | 4                  | 3490 | (-) | NNW                                          | TCTATTTTCATGTATTATTCTT   |
| M00162 | V\$OCT1_06 | 0.825<br>0.81359   | 3490 | (+) | CWNAWTKWSATRYN                               | TCTATTTTCATGTA           |
| M00195 | V\$OCT1_Q6 | 2<br>0.83939       | 3490 | (-) | NNNNATGCAAATNAN<br>NNNNNNNNWATGCAAATNNNW     | TCTATTTTCATGTAT          |
| M00138 | V\$OCT1_04 | 8<br>0.84407       | 3497 | (-) | NNW                                          | TCATGTATTATTCATTCTTTCTC  |
| M00136 | V\$OCT1_02 | 1<br>0.81328       | 3500 | (+) | NNGAATATKCANNNN                              | TGTATTATTCATTCT          |
| M00162 | V\$OCT1_06 | 1<br>0.83437       | 3501 | (+) | CWNAWTKWSATRYN                               | GTATTATTCATTCT           |
| M00162 | V\$OCT1_06 | 5<br>0.81210       | 3534 | (+) | CWNAWTKWSATRYN                               | AAACATATGATTTA           |
| M00162 | V\$OCT1_06 | 9<br>0.83133       | 3535 | (-) | CWNAWTKWSATRYN                               | AACATATGATTTAC           |
| M00195 | V\$OCT1_Q6 | 2<br>0.78500       | 3540 | (-) | NNNNATGCAAATNAN                              | ATGATTTACAACCTTG         |
| M00135 | V\$OCT1_01 | 6<br>0.85202       | 3556 | (-) | NNNNWTATGCAAATNTNNN                          | TCTCAATTTACACACTGAG      |
| M00248 | V\$OCT1_07 | 5<br>0.78586       | 3560 | (-) | TNTATGNTAATT                                 | AATTTACACACT             |
| M00136 | V\$OCT1_02 | 9                  | 3567 | (-) | NNGAATATKCANNNN                              | ACACTGAGTATTAAA          |

|        |            |         |      |     |                       |                        |  |
|--------|------------|---------|------|-----|-----------------------|------------------------|--|
|        |            | 0.77422 |      |     |                       |                        |  |
| M00136 | V\$OCT1_02 | 8       | 3570 | (+) | NNGAATATKCANNNN       | CTGAGTATTAAATTA        |  |
|        |            | 0.80351 |      |     |                       |                        |  |
| M00162 | V\$OCT1_06 | 6       | 3572 | (+) | CWNAWTKWSATRYN        | GAGTATTAAATTAG         |  |
|        |            | 0.80429 |      |     |                       |                        |  |
| M00162 | V\$OCT1_06 | 7       | 3573 | (-) | CWNAWTKWSATRYN        | AGTATTAAATTAGA         |  |
|        |            | 0.89414 |      |     |                       |                        |  |
| M00162 | V\$OCT1_06 | 1       | 3577 | (+) | CWNAWTKWSATRYN        | TTAAATTAGATACT         |  |
|        |            | 0.80859 |      |     |                       |                        |  |
| M00162 | V\$OCT1_06 | 4       | 3578 | (-) | CWNAWTKWSATRYN        | TAAATTAGATACTC         |  |
|        |            | 0.84765 |      |     |                       |                        |  |
| M00162 | V\$OCT1_06 | 6       | 3646 | (+) | CWNAWTKWSATRYN        | CATTTTTTAATCTG         |  |
|        |            | 0.85420 |      |     |                       |                        |  |
| M00137 | V\$OCT1_03 | 8       | 3694 | (-) | NNNRTAATNANNN         | CTTCTTTACCCC           |  |
|        |            | 0.78063 |      |     | NNNNNNNNWATGCAAATNNNW |                        |  |
| M00138 | V\$OCT1_04 | 6       | 3723 | (+) | NNW                   | AGTTAGCTATGATAAACTGAA  |  |
|        |            | 0.79054 |      |     |                       |                        |  |
| M00248 | V\$OCT1_07 | 5       | 3728 | (+) | TNTATGNTAATT          | GCTATGATAAAT           |  |
|        |            | 0.80312 |      |     |                       |                        |  |
| M00162 | V\$OCT1_06 | 5       | 3736 | (+) | CWNAWTKWSATRYN        | AAATACTGAATGTC         |  |
|        |            | 0.80429 |      |     |                       |                        |  |
| M00162 | V\$OCT1_06 | 7       | 3741 | (+) | CWNAWTKWSATRYN        | CTGAATGTCTTCTT         |  |
|        |            |         |      |     | NNNNNNNNWATGCAAATNNNW |                        |  |
| M00138 | V\$OCT1_04 | 0.84609 | 3749 | (-) | NNW                   | CTTCTTCATTTCATTTCATT   |  |
|        |            | 0.78786 |      |     |                       |                        |  |
| M00135 | V\$OCT1_01 | 7       | 3751 | (-) | NNNNWTATGCAAATNTNNN   | TCTTCATTTCATTTCAT      |  |
|        |            | 0.87863 |      |     |                       |                        |  |
| M00161 | V\$OCT1_05 | 2       | 3753 | (+) | MKNATTGTCATAYY        | TTCATTTCATTTT          |  |
|        |            | 0.84525 |      |     |                       |                        |  |
| M00195 | V\$OCT1_Q6 | 1       | 3753 | (-) | NNNNATGCAAATNAN       | TTCATTTCATTTTC         |  |
|        |            | 0.77287 |      |     |                       |                        |  |
| M00136 | V\$OCT1_02 | 5       | 3755 | (-) | NNGAATATKCANNNN       | CATTTCATTTTCAT         |  |
|        |            | 0.84148 |      |     | NNNNNNNNWATGCAAATNNNW |                        |  |
| M00138 | V\$OCT1_04 | 9       | 3755 | (-) | NNW                   | CATTTCATTTTCATTGTATAC  |  |
|        |            | 0.79584 |      |     |                       |                        |  |
| M00248 | V\$OCT1_07 | 5       | 3755 | (-) | TNTATGNTAATT          | CATTTCATTTT            |  |
|        |            | 0.76306 |      |     |                       |                        |  |
| M00135 | V\$OCT1_01 | 8       | 3757 | (-) | NNNNWTATGCAAATNTNNN   | TTTCCATTTTCATTGTAT     |  |
|        |            | 0.82831 |      |     | NNNNNNNNWATGCAAATNNNW |                        |  |
| M00138 | V\$OCT1_04 | 5       | 3761 | (-) | NNW                   | CATTTTCATTGTATACATTCGT |  |
|        |            | 0.76993 |      |     |                       |                        |  |
| M00135 | V\$OCT1_01 | 5       | 3763 | (-) | NNNNWTATGCAAATNTNNN   | TTTTCATTGTATACATTC     |  |
|        |            |         |      |     |                       |                        |  |
| M00195 | V\$OCT1_Q6 | 0.8619  | 3765 | (-) | NNNNATGCAAATNAN       | TTCATTGTATACAT         |  |
|        |            | 0.80585 |      |     |                       |                        |  |
| M00162 | V\$OCT1_06 | 9       | 3790 | (-) | CWNAWTKWSATRYN        | TGTATCCAGGTACT         |  |
|        |            | 0.87633 |      |     |                       |                        |  |
| M00137 | V\$OCT1_03 | 3       | 3809 | (-) | NNNRTAATNANNN         | AGTTGATTACCCT          |  |
|        |            | 0.89766 |      |     |                       |                        |  |
| M00137 | V\$OCT1_03 | 9       | 3834 | (-) | NNNRTAATNANNN         | TTTTCATTACATT          |  |
|        |            |         |      |     |                       |                        |  |
| M00162 | V\$OCT1_06 | 0.85    | 3835 | (+) | CWNAWTKWSATRYN        | TTTCATTACATTCC         |  |
|        |            | 0.83476 |      |     |                       |                        |  |
| M00162 | V\$OCT1_06 | 6       | 3836 | (-) | CWNAWTKWSATRYN        | TTCATTACATTCTT         |  |
|        |            | 0.84670 |      |     |                       |                        |  |
| M00137 | V\$OCT1_03 | 1       | 3871 | (+) | NNNRTAATNANNN         | TTGATAAGGAAGA          |  |
|        |            | 0.86250 |      |     |                       |                        |  |
| M00137 | V\$OCT1_03 | 5       | 3903 | (+) | NNNRTAATNANNN         | CTGATAAAGAAGG          |  |
|        |            | 0.83984 |      |     |                       |                        |  |
| M00162 | V\$OCT1_06 | 4       | 3931 | (+) | CWNAWTKWSATRYN        | CTCCTTCAGATTTT         |  |
|        |            | 0.85273 |      |     |                       |                        |  |
| M00162 | V\$OCT1_06 | 4       | 3937 | (+) | CWNAWTKWSATRYN        | CAGATTTTAAAATA         |  |
|        |            | 0.80585 |      |     |                       |                        |  |
| M00162 | V\$OCT1_06 | 9       | 3944 | (-) | CWNAWTKWSATRYN        | TAAAATAAAATCAT         |  |
|        |            | 0.80585 |      |     |                       |                        |  |
| M00162 | V\$OCT1_06 | 9       | 3950 | (-) | CWNAWTKWSATRYN        | AAAATCATAAAACT         |  |

|        |            |         |      |     |                       |                         |
|--------|------------|---------|------|-----|-----------------------|-------------------------|
|        |            | 0.85507 |      |     |                       |                         |
| M00162 | V\$OCT1_06 | 8       | 3963 | (-) | CWNAWTKWSATRYN        | TGAAACTAATTATC          |
|        |            | 0.91228 |      |     |                       |                         |
| M00137 | V\$OCT1_03 | 8       | 3966 | (-) | NNNRTAATNANNN         | AACTAATTATCTC           |
|        |            | 0.84546 |      |     | NNNNNNNNWATGCAAATNNNW |                         |
| M00138 | V\$OCT1_04 | 2       | 3975 | (-) | NNW                   | TCTCTTATTTTACCTAAGAAATA |
|        |            | 0.83945 |      |     |                       |                         |
| M00162 | V\$OCT1_06 | 3       | 3994 | (+) | CWNAWTKWSATRYN        | AATATTTTGGTTTA          |
|        |            | 0.81116 |      |     | NNNNNNNNWATGCAAATNNNW |                         |
| M00138 | V\$OCT1_04 | 7       | 3996 | (-) | NNW                   | TATTTTGGTTTACCTAAATAAAT |
|        |            | 0.80280 |      |     | NNNNNNNNWATGCAAATNNNW |                         |
| M00138 | V\$OCT1_04 | 2       | 3999 | (+) | NNW                   | TTTGGTTTACCTAAATAAATGGA |
|        |            | 0.78042 |      |     | NNNNNNNNWATGCAAATNNNW |                         |
| M00138 | V\$OCT1_04 | 7       | 4009 | (+) | NNW                   | CTAAATAAATGGAGAATTTGTGT |
|        |            | 0.81367 |      |     | NNNNNNNNWATGCAAATNNNW |                         |
| M00138 | V\$OCT1_04 | 6       | 4022 | (+) | NNW                   | GAATTTGTGTTCAAATGGAAAAA |
|        |            | 0.82831 |      |     | NNNNNNNNWATGCAAATNNNW |                         |
| M00138 | V\$OCT1_04 | 5       | 4028 | (+) | NNW                   | GTGTTCAAATGGAAAAACATTCT |
|        |            | 0.78502 |      |     | NNNNNNNNWATGCAAATNNNW |                         |
| M00138 | V\$OCT1_04 | 7       | 4048 | (-) | NNW                   | TCTCCTTTTTTGACTGTGTTTTT |
|        |            | 0.81367 |      |     |                       |                         |
| M00162 | V\$OCT1_06 | 2       | 4052 | (+) | CWNAWTKWSATRYN        | CTTTTTTGACTGTG          |
|        |            | 0.80039 |      |     |                       |                         |
| M00162 | V\$OCT1_06 | 1       | 4063 | (+) | CWNAWTKWSATRYN        | GTGTTTTTCACTTT          |
|        |            | 0.80185 |      |     |                       |                         |
| M00195 | V\$OCT1_Q6 | 6       | 4063 | (-) | NNNNATGCAAATNAN       | GTGTTTTTCACTTTT         |
|        |            | 0.82929 |      |     |                       |                         |
| M00162 | V\$OCT1_06 | 7       | 4071 | (+) | CWNAWTKWSATRYN        | CACTTTTACAATTC          |
|        |            |         |      |     |                       |                         |
| M00162 | V\$OCT1_06 | 0.925   | 4084 | (+) | CWNAWTKWSATRYN        | CACAATTTAATTCC          |
|        |            | 0.82187 |      |     |                       |                         |
| M00162 | V\$OCT1_06 | 5       | 4085 | (-) | CWNAWTKWSATRYN        | ACAATTTAATTCTT          |
|        |            | 0.79297 |      |     | NNNNNNNNWATGCAAATNNNW |                         |
| M00138 | V\$OCT1_04 | 4       | 4105 | (+) | NNW                   | AGTCCTCAATGAAAATTTACTCA |
|        |            | 0.73674 |      |     |                       |                         |
| M00135 | V\$OCT1_01 | 2       | 4107 | (+) | NNNNWTATGCAAATNTNNN   | TCCTCAATGAAAATTTACT     |
|        |            | 0.84765 |      |     |                       |                         |
| M00162 | V\$OCT1_06 | 6       | 4109 | (+) | CWNAWTKWSATRYN        | CTCAATGAAAATTT          |
|        |            | 0.77964 |      |     |                       |                         |
| M00136 | V\$OCT1_02 | 3       | 4110 | (-) | NNGAATATKCANNNN       | TCAATGAAAATTTAC         |
|        |            | 0.80429 |      |     |                       |                         |
| M00162 | V\$OCT1_06 | 7       | 4110 | (-) | CWNAWTKWSATRYN        | TCAATGAAAATTTA          |
|        |            | 0.84354 |      |     |                       |                         |
| M00248 | V\$OCT1_07 | 5       | 4110 | (+) | TNTATGNTAATT          | TCAATGAAAATT            |
|        |            | 0.81591 |      |     |                       |                         |
| M00136 | V\$OCT1_02 | 8       | 4113 | (+) | NNGAATATKCANNNN       | ATGAAAATTTACTCA         |
|        |            |         |      |     |                       |                         |
| M00162 | V\$OCT1_06 | 0.85    | 4171 | (-) | CWNAWTKWSATRYN        | CAAATGTATTTTTC          |
|        |            | 0.81304 |      |     | NNNNNNNNWATGCAAATNNNW |                         |
| M00138 | V\$OCT1_04 | 9       | 4176 | (+) | NNW                   | GTATTTTCTGGAAAAATCAACT  |
|        |            | 0.73502 |      |     |                       |                         |
| M00135 | V\$OCT1_01 | 5       | 4178 | (+) | NNNNWTATGCAAATNTNNN   | ATTTTCTGGAAAAATCAA      |
|        |            | 0.83945 |      |     |                       |                         |
| M00162 | V\$OCT1_06 | 3       | 4189 | (-) | CWNAWTKWSATRYN        | AAAATCAACTTAAT          |
|        |            | 0.81367 |      |     |                       |                         |
| M00162 | V\$OCT1_06 | 2       | 4192 | (+) | CWNAWTKWSATRYN        | ATCAACTTAATTTT          |
|        |            | 0.80656 |      |     | NNNNNNNNWATGCAAATNNNW |                         |
| M00138 | V\$OCT1_04 | 6       | 4193 | (+) | NNW                   | TCAACTTAATTTTATTTATAAA  |
|        |            | 0.80217 |      |     | NNNNNNNNWATGCAAATNNNW |                         |
| M00138 | V\$OCT1_04 | 5       | 4194 | (-) | NNW                   | CAACTTAATTTTATTTATAAAT  |
|        |            | 0.83145 |      |     | NNNNNNNNWATGCAAATNNNW |                         |
| M00138 | V\$OCT1_04 | 1       | 4198 | (-) | NNW                   | TTAATTTTATTTATAAAATATT  |
|        |            | 0.82041 |      |     |                       |                         |
| M00195 | V\$OCT1_Q6 | 5       | 4198 | (-) | NNNNATGCAAATNAN       | TTAATTTTATTTAT          |
|        |            | 0.83605 |      |     | NNNNNNNNWATGCAAATNNNW |                         |
| M00138 | V\$OCT1_04 | 2       | 4199 | (+) | NNW                   | TAATTTTATTTATAAAATATTT  |

|        |            |         |      |     |                      |                          |
|--------|------------|---------|------|-----|----------------------|--------------------------|
|        |            | 0.78690 |      |     | NNNNNNNWATGCAAATNNNW |                          |
| M00138 | V\$OCT1_04 | 9       | 4200 | (-) | NNW                  | AATTTTATTTATAAAATATTTTT  |
|        |            | 0.85759 |      |     | NNNNNNNWATGCAAATNNNW |                          |
| M00138 | V\$OCT1_04 | 1       | 4202 | (-) | NNW                  | TTTTATTTATAAAATATTTTTTC  |
|        |            | 0.84551 |      |     |                      |                          |
| M00137 | V\$OCT1_03 | 6       | 4203 | (-) | NNNRTAATNANNN        | TTTTATTTATAAA            |
|        |            | 0.85194 |      |     | NNNNNNNWATGCAAATNNNW |                          |
| M00138 | V\$OCT1_04 | 5       | 4203 | (+) | NNW                  | TTTTATTTATAAAATATTTTTTCA |
|        |            | 0.80154 |      |     | NNNNNNNWATGCAAATNNNW |                          |
| M00138 | V\$OCT1_04 | 7       | 4204 | (-) | NNW                  | TTTATTTATAAAATATTTTTTCAC |
|        |            | 0.83324 |      |     |                      |                          |
| M00136 | V\$OCT1_02 | 3       | 4208 | (-) | NNGAATATKCANNNN      | TTTATAAAATATTTTT         |
|        |            | 0.85934 |      |     |                      |                          |
| M00137 | V\$OCT1_03 | 4       | 4208 | (+) | NNNRTAATNANNN        | TTTATAAAATATTT           |
|        |            | 0.78099 |      |     |                      |                          |
| M00136 | V\$OCT1_02 | 6       | 4211 | (+) | NNGAATATKCANNNN      | ATAAATATTTTTTCA          |
|        |            | 0.79109 |      |     | NNNNNNNWATGCAAATNNNW |                          |
| M00138 | V\$OCT1_04 | 2       | 4233 | (-) | NNW                  | AAATTTTTCTTCATTGCTCAC    |
|        |            | 0.83189 |      |     | NNGAATATKCANNNN      | ACAAAGAATATTGAA          |
|        |            | 0.83688 |      |     | NNNNNNNWATGCAAATNNNW |                          |
| M00138 | V\$OCT1_04 | 8       | 4267 | (+) | NNW                  | CAAAGAATATTGAAATTATATAT  |
|        |            | 0.76726 |      |     |                      |                          |
| M00135 | V\$OCT1_01 | 4       | 4269 | (+) | NNNNWTATGCAAATNTNNN  | AAGAATATTGAAATTATAT      |
|        |            | 0.85652 |      |     |                      |                          |
| M00136 | V\$OCT1_02 | 4       | 4269 | (+) | NNGAATATKCANNNN      | AAGAATATTGAAATT          |
|        |            | 0.81495 |      |     |                      |                          |
| M00195 | V\$OCT1_Q6 | 6       | 4271 | (+) | NNNNATGCAAATNAN      | GAATATTGAAATTAT          |
|        |            | 0.89739 |      |     |                      |                          |
| M00161 | V\$OCT1_05 | 3       | 4272 | (-) | MKNATTGTCATAYY       | AATATTGAAATTAT           |
|        |            | 0.84765 |      |     |                      |                          |
| M00162 | V\$OCT1_06 | 6       | 4272 | (+) | CWNAWTKWSATRYN       | AATATTGAAATTAT           |
|        |            | 0.85273 |      |     |                      |                          |
| M00162 | V\$OCT1_06 | 4       | 4272 | (-) | CWNAWTKWSATRYN       | AATATTGAAATTAT           |
|        |            | 0.88912 |      |     |                      |                          |
| M00248 | V\$OCT1_07 | 4       | 4272 | (+) | TNTATGNTAATT         | AATATTGAAATT             |
|        |            | 0.81702 |      |     | NNNNNNNWATGCAAATNNNW |                          |
| M00138 | V\$OCT1_04 | 2       | 4279 | (-) | NNW                  | AAATTATATATGCAAATATTA    |
|        |            | 0.92869 |      |     | NNNNNNNWATGCAAATNNNW |                          |
| M00138 | V\$OCT1_04 | 1       | 4280 | (+) | NNW                  | AATTATATATGCAAATATTA     |
|        |            | 0.7562  |      |     | NNNNWTATGCAAATNTNNN  |                          |
| M00135 | V\$OCT1_01 | 3       | 4281 | (-) | NNNNWTATGCAAATNTNNN  | ATTATATATGCAAATATTA      |
|        |            | 0.95345 |      |     |                      |                          |
| M00135 | V\$OCT1_01 | 3       | 4282 | (+) | NNNNWTATGCAAATNTNNN  | TTATATATGCAAATATTA       |
|        |            | 0.83784 |      |     |                      |                          |
| M00136 | V\$OCT1_02 | 5       | 4282 | (+) | NNGAATATKCANNNN      | TTATATATGCAAATA          |
|        |            | 0.88946 |      |     |                      |                          |
| M00195 | V\$OCT1_Q6 | 5       | 4284 | (+) | NNNNATGCAAATNAN      | ATATATGCAAATATT          |
|        |            | 0.9375  |      |     | CWNAWTKWSATRYN       |                          |
| M00162 | V\$OCT1_06 | 5       | 4285 | (-) | CWNAWTKWSATRYN       | TATATGCAAATATT           |
|        |            | 0.87322 |      |     |                      |                          |
| M00248 | V\$OCT1_07 | 5       | 4285 | (+) | TNTATGNTAATT         | TATATGCAAATA             |
|        |            | 0.77585 |      |     |                      |                          |
| M00136 | V\$OCT1_02 | 3       | 4287 | (-) | NNGAATATKCANNNN      | TATGCAAATATTA            |
|        |            | 0.78628 |      |     | NNNNNNNWATGCAAATNNNW |                          |
| M00138 | V\$OCT1_04 | 2       | 4288 | (+) | NNW                  | ATGCAAATATTAAGCTGCTT     |
|        |            | 0.86992 |      |     |                      |                          |
| M00162 | V\$OCT1_06 | 2       | 4293 | (-) | CWNAWTKWSATRYN       | AATATTAAGCT              |
|        |            | 0.91679 |      |     |                      |                          |
| M00162 | V\$OCT1_06 | 7       | 4305 | (+) | CWNAWTKWSATRYN       | CTGCTTTAAATATT           |
|        |            | 0.80731 |      |     |                      |                          |
| M00195 | V\$OCT1_Q6 | 4       | 4305 | (-) | NNNNATGCAAATNAN      | CTGCTTTAAATATTA          |
|        |            | 0.82214 |      |     |                      |                          |
| M00136 | V\$OCT1_02 | 4       | 4307 | (-) | NNGAATATKCANNNN      | GCTTTAAATATTAAT          |
|        |            | 0.78105 |      |     | NNNNNNNWATGCAAATNNNW |                          |
| M00138 | V\$OCT1_04 | 4       | 4307 | (-) | NNW                  | GCTTTAAATATTAATCTGTACCT  |



|        |            |                    |      |     |                              |                         |
|--------|------------|--------------------|------|-----|------------------------------|-------------------------|
| M00162 | V\$OCT1_06 | 0.80468<br>7       | 4311 | (-) | CWNAWTKWSATRYN               | TAAATATTAATCTG          |
| M00138 | V\$OCT1_04 | 0.81639<br>5       | 4327 | (-) | NNNNNNNNWATGCAAATNNNW<br>NNW | CCTATACATTTGACTCTTTGTAA |
| M00162 | V\$OCT1_06 | 0.81328<br>1       | 4330 | (+) | CWNAWTKWSATRYN               | ATACATTTGACTCT          |
| M00162 | V\$OCT1_06 | 0.81875<br>0.80363 | 4340 | (+) | CWNAWTKWSATRYN               | CTCTTTGTAAAACA          |
| M00138 | V\$OCT1_04 | 0.80363<br>9       | 4359 | (+) | NNNNNNNNWATGCAAATNNNW<br>NNW | GCTGTCTTGTGCATAATCTATGT |
| M00135 | V\$OCT1_01 | 0.77737<br>5       | 4360 | (-) | NNNNWTATGCAAATNTNNN          | CTGTCTTGTGCATAATCTA     |
| M00136 | V\$OCT1_02 | 0.86599<br>9       | 4364 | (-) | NNGAATATKCANNNN              | CTTGTGCATAATCTA         |
| M00138 | V\$OCT1_04 | 0.85947<br>3       | 4370 | (+) | NNNNNNNNWATGCAAATNNNW<br>NNW | CATAATCTATGTAAATTTTATAA |
| M00135 | V\$OCT1_01 | 0.83193<br>4       | 4372 | (+) | NNNNWTATGCAAATNTNNN          | TAATCTATGTAAATTTTAT     |
| M00195 | V\$OCT1_Q6 | 0.83979<br>3       | 4374 | (+) | NNNNATGCAAATNAN              | ATCTATGTAAATTTT         |
| M00162 | V\$OCT1_06 | 0.88125            | 4375 | (-) | CWNAWTKWSATRYN               | TCTATGTAAATTTT          |
| M00248 | V\$OCT1_07 | 0.96926<br>0.81890 | 4375 | (+) | TNTATGNTAATT                 | TCTATGTAAATT            |
| M00138 | V\$OCT1_04 | 0.81890<br>4       | 4379 | (-) | NNNNNNNNWATGCAAATNNNW<br>NNW | TGTAAATTTTATAATTTCCATTC |
| M00162 | V\$OCT1_06 | 0.82929<br>7       | 4381 | (-) | CWNAWTKWSATRYN               | TAAATTTTATAATT          |
| M00162 | V\$OCT1_06 | 0.80078<br>1       | 4383 | (+) | CWNAWTKWSATRYN               | AATTTTATAATTTT          |
| M00138 | V\$OCT1_04 | 0.90171<br>5       | 4385 | (-) | NNNNNNNNWATGCAAATNNNW<br>NNW | TTTTATAATTTCCATTCTCATTA |
| M00135 | V\$OCT1_01 | 0.78901<br>2       | 4387 | (-) | NNNNWTATGCAAATNTNNN          | TTATAATTTCCATTCTCAT     |
| M00161 | V\$OCT1_05 | 0.93690<br>9       | 4389 | (+) | MKNATTTGCATAYY               | ATAATTTCCATTCT          |
| M00162 | V\$OCT1_06 | 0.86054<br>7       | 4389 | (+) | CWNAWTKWSATRYN               | ATAATTTCCATTCT          |
| M00195 | V\$OCT1_Q6 | 0.88318<br>8       | 4389 | (-) | NNNNATGCAAATNAN              | ATAATTTCCATTCTC         |
| M00162 | V\$OCT1_06 | 0.80859<br>4       | 4390 | (-) | CWNAWTKWSATRYN               | TAATTTCCATTCTC          |
| M00248 | V\$OCT1_07 | 0.89866<br>4       | 4391 | (-) | TNTATGNTAATT                 | AATTTCCATTCT            |
| M00137 | V\$OCT1_03 | 0.96246<br>5       | 4399 | (-) | NNNRTAATNANNN                | TTCTCATTATGAT           |
| M00162 | V\$OCT1_06 | 0.80195<br>3       | 4401 | (+) | CWNAWTKWSATRYN               | CTCATTATGATGGA          |
| M00136 | V\$OCT1_02 | 0.81483<br>5       | 4408 | (-) | NNGAATATKCANNNN              | TGATGGAATGTTCTC         |
| M00136 | V\$OCT1_02 | 0.81781<br>3       | 4430 | (+) | NNGAATATKCANNNN              | TACAATATTCTGGAT         |
| M00162 | V\$OCT1_06 | 0.80039<br>1       | 4434 | (+) | CWNAWTKWSATRYN               | ATATTCTGGATGTG          |
| M00137 | V\$OCT1_03 | 0.84393<br>5       | 4456 | (+) | NNNRTAATNANNN                | TCTGTAATTTTAT           |
| M00162 | V\$OCT1_06 | 0.80859<br>4       | 4467 | (+) | CWNAWTKWSATRYN               | ATGACTGAATTGTC          |
| M00136 | V\$OCT1_02 | 0.78938<br>8       | 4468 | (-) | NNGAATATKCANNNN              | TGACTGAATTGTCAA         |
| M00162 | V\$OCT1_06 | 0.82148<br>4       | 4473 | (-) | CWNAWTKWSATRYN               | GAATTGTCAAACAG          |
| M00138 | V\$OCT1_04 | 0.80698<br>5       | 4486 | (+) | NNNNNNNNWATGCAAATNNNW<br>NNW | GAACACAAATAGAAATTTTATTT |
| M00135 | V\$OCT1_01 | 0.7314             | 4488 | (+) | NNNNWTATGCAAATNTNNN          | ACACAAATAGAAATTTTAT     |

|        |            |              |      |     |                              |                         |
|--------|------------|--------------|------|-----|------------------------------|-------------------------|
| M00162 | V\$OCT1_06 | 0.86054<br>7 | 4491 | (+) | CWNAWTKWSATRYN               | CAAATAGAAATTTT          |
| M00162 | V\$OCT1_06 | 0.83476<br>6 | 4496 | (+) | CWNAWTKWSATRYN               | AGAAATTTTATTTC          |
| M00162 | V\$OCT1_06 | 0.82656<br>2 | 4497 | (+) | CWNAWTKWSATRYN               | GAAATTTTATTTC           |
| M00162 | V\$OCT1_06 | 0.81367<br>2 | 4502 | (-) | CWNAWTKWSATRYN               | TTTATTTCAAGACC          |
| M00162 | V\$OCT1_06 | 0.89062<br>5 | 4516 | (-) | CWNAWTKWSATRYN               | AGTATTTAAAAGAT          |
| M00138 | V\$OCT1_04 | 0.83688<br>8 | 4553 | (-) | NNNNNNNNWATGCAAATNNNW<br>NNW | TGAATGATTTTAAATATAATCTT |
| M00162 | V\$OCT1_06 | 0.82656<br>2 | 4557 | (+) | CWNAWTKWSATRYN               | TGATTTTAAATATA          |
| M00162 | V\$OCT1_06 | 0.86835<br>9 | 4611 | (-) | CWNAWTKWSATRYN               | GGTAAGAAATTCTG          |
| M00162 | V\$OCT1_06 | 0.85312<br>5 | 4622 | (+) | CWNAWTKWSATRYN               | CTGAATAGAATATA          |
| M00136 | V\$OCT1_02 | 0.81212<br>8 | 4624 | (-) | NNGAATATKCANNNN              | GAATAGAATATACTG         |
| M00138 | V\$OCT1_04 | 0.79757<br>4 | 4628 | (+) | NNNNNNNNWATGCAAATNNNW<br>NNW | AGAATATACTGCAGAATTAACAA |
| M00248 | V\$OCT1_07 | 0.86220<br>1 | 4642 | (-) | TNTATGNTAATT                 | AATTAACAAAGC            |
| M00136 | V\$OCT1_02 | 0.78911<br>7 | 4647 | (-) | NNGAATATKCANNNN              | ACAAAGCATTTTATT         |
| M00162 | V\$OCT1_06 | 0.82929<br>7 | 4650 | (+) | CWNAWTKWSATRYN               | AAGCATTTTATTCT          |
| M00162 | V\$OCT1_06 | 0.80703<br>1 | 4651 | (-) | CWNAWTKWSATRYN               | AGCATTTTATTCTA          |
| M00162 | V\$OCT1_06 | 0.80429<br>7 | 4661 | (-) | CWNAWTKWSATRYN               | TCTATGTTATTTAT          |
| M00248 | V\$OCT1_07 | 0.89527<br>2 | 4661 | (+) | TNTATGNTAATT                 | TCTATGTTATTT            |
| M00135 | V\$OCT1_01 | 0.75753<br>5 | 4667 | (+) | NNNNWTATGCAAATNTNNN          | TTATTTATGGTATTATACC     |
| M00248 | V\$OCT1_07 | 0.79520<br>9 | 4670 | (+) | TNTATGNTAATT                 | TTTATGGTATTA            |
| M00138 | V\$OCT1_04 | 0.79903<br>8 | 4673 | (+) | NNNNNNNNWATGCAAATNNNW<br>NNW | ATGGTATTATACCAATTCTTTAT |
| M00135 | V\$OCT1_01 | 0.73731<br>4 | 4675 | (+) | NNNNWTATGCAAATNTNNN          | GGTATTATACCAATTCTTT     |
| M00162 | V\$OCT1_06 | 0.83437<br>5 | 4690 | (+) | CWNAWTKWSATRYN               | CTTTATGCTTTT            |
| M00162 | V\$OCT1_06 | 0.80039<br>1 | 4710 | (-) | CWNAWTKWSATRYN               | AAAATCACTTAGAT          |
| M00162 | V\$OCT1_06 | 0.82695<br>3 | 4713 | (+) | CWNAWTKWSATRYN               | ATCACTTAGATTAT          |
| M00137 | V\$OCT1_03 | 0.88542<br>1 | 4720 | (-) | NNNRTAATNANNN                | AGATTATTATTAG           |
| M00135 | V\$OCT1_01 | 0.73616<br>9 | 4723 | (-) | NNNNWTATGCAAATNTNNN          | TTATTATTAGATTATTGAA     |
| M00137 | V\$OCT1_03 | 0.84709<br>6 | 4723 | (-) | NNNRTAATNANNN                | TTATTATTAGATT           |
| M00138 | V\$OCT1_04 | 0.79109<br>2 | 4787 | (-) | NNNNNNNNWATGCAAATNNNW<br>NNW | ATGAAAGATAATAATAGTCAAAT |
| M00137 | V\$OCT1_03 | 0.86764<br>1 | 4791 | (+) | NNNRTAATNANNN                | AAGATAATAATAG           |
| M00138 | V\$OCT1_04 | 0.82852<br>4 | 4794 | (+) | NNNNNNNNWATGCAAATNNNW<br>NNW | ATAATAATAGTCAAATTTACTGG |
| M00135 | V\$OCT1_01 | 0.76325<br>8 | 4796 | (+) | NNNNWTATGCAAATNTNNN          | AATAATAGTCAAATTTACT     |
| M00136 | V\$OCT1_02 | 0.81700<br>1 | 4796 | (+) | NNGAATATKCANNNN              | AATAATAGTCAAATT         |
| M00248 | V\$OCT1_07 | 0.79520<br>9 | 4799 | (+) | TNTATGNTAATT                 | AATAGTCAAATT            |

|        |            |                 |      |                     |                                         |                         |
|--------|------------|-----------------|------|---------------------|-----------------------------------------|-------------------------|
| M00138 | V\$OCT1_04 | 0.81158<br>5    | 4818 | (+)                 | NNNNNNNNWATGCAAATNNNW<br>NNW            | ACAAAATTTTTTAAATATTTTAA |
| M00138 | V\$OCT1_04 | 0.83061<br>5    | 4819 | (-)                 | NNNNNNNNWATGCAAATNNNW<br>NNW            | CAAAATTTTTTAAATATTTTAA  |
| M00162 | V\$OCT1_06 | 0.90351<br>6    | 4823 | (+)                 | CWNAWTKWSATRYN                          | ATTTTTTAAATATT          |
| M00136 | V\$OCT1_02 | 0.83107<br>7    | 4825 | (-)                 | NNGAATATKCANNNN                         | TTTTTAAATATTTTT         |
| M00137 | V\$OCT1_03 | 0.84275<br>4867 | (+)  | NNNRTAATNANNN       | TAAATAAAGAAAA                           |                         |
| M00138 | V\$OCT1_04 | 0.78356<br>3    | 4902 | (+)                 | NNNNNNNNWATGCAAATNNNW<br>NNW            | AAATGATATTGCAAGAAATATTA |
| M00135 | V\$OCT1_01 | 0.75333<br>8    | 4931 | (-)                 | NNNNWTATGCAAATNTNNN                     | TCACAAAAAGCATATTTAT     |
| M00136 | V\$OCT1_02 | 0.87574<br>4    | 4935 | (-)                 | NNGAATATKCANNNN                         | AAAAAGCATATTTAT         |
| M00136 | V\$OCT1_02 | 0.84163<br>5    | 4938 | (+)                 | NNGAATATKCANNNN                         | AAGCATATTTATTTT         |
| M00162 | V\$OCT1_06 | 0.80429<br>7    | 4941 | (+)                 | CWNAWTKWSATRYN                          | CATATTTATTTTTT          |
| M00162 | V\$OCT1_06 | 0.84218<br>7    | 4941 | (-)                 | CWNAWTKWSATRYN<br>NNNNNNNNWATGCAAATNNNW | CATATTTATTTTTT          |
| M00138 | V\$OCT1_04 | 0.78189<br>4943 | (-)  | NNW                 | TATTTATTTTTTAAATTGCAGCA                 |                         |
| M00162 | V\$OCT1_06 | 0.82148<br>4    | 4947 | (+)                 | CWNAWTKWSATRYN                          | TATTTTTTAATTG           |
| M00248 | V\$OCT1_07 | 0.83167<br>3    | 4947 | (+)                 | TNTATGNTAATT                            | TATTTTTTAATT            |
| M00138 | V\$OCT1_04 | 0.86344<br>6    | 4949 | (-)                 | NNNNNNNNWATGCAAATNNNW<br>NNW            | TTTTTTAATTTGCAGCAGCAAAA |
| M00135 | V\$OCT1_01 | 0.74418<br>2    | 4951 | (-)                 | NNNNWTATGCAAATNTNNN                     | TTTAAATTTGCAGCAGCAA     |
| M00162 | V\$OCT1_06 | 0.87343<br>7    | 4967 | (+)                 | CWNAWTKWSATRYN                          | CAAAATGTAAGATA          |
| M00162 | V\$OCT1_06 | 0.89843<br>7    | 4968 | (-)                 | CWNAWTKWSATRYN                          | AAAATGTAAGATAC          |
| M00162 | V\$OCT1_06 | 0.83398<br>4    | 4978 | (+)                 | CWNAWTKWSATRYN                          | ATACATTCTTACA           |
| M00162 | V\$OCT1_06 | 0.84218<br>7    | 4979 | (-)                 | CWNAWTKWSATRYN                          | TACATTCTTACAG           |
| M00162 | V\$OCT1_06 | 0.82109<br>4    | 4982 | (+)                 | CWNAWTKWSATRYN                          | ATTCTTACAGATA           |
| M00136 | V\$OCT1_02 | 0.77233<br>4    | 4989 | (+)                 | NNGAATATKCANNNN                         | ACAGATATCCATCCA         |
| M00162 | V\$OCT1_06 | 0.85507<br>8    | 4998 | (+)                 | CWNAWTKWSATRYN                          | CATCCATTCATGTT          |
| M00162 | V\$OCT1_06 | 0.80039<br>1    | 5039 | (-)                 | CWNAWTKWSATRYN                          | AACATCAATGAACT          |
| M00248 | V\$OCT1_07 | 0.79245<br>3    | 5062 | (-)                 | TNTATGNTAATT                            | AAGGAACATAAA            |
| M00162 | V\$OCT1_06 | 0.86835<br>9    | 5069 | (+)                 | CWNAWTKWSATRYN                          | ATAAATGATATTTA          |
| M00138 | V\$OCT1_04 | 0.86072<br>8    | 5070 | (+)                 | NNNNNNNNWATGCAAATNNNW<br>NNW            | TAAATGATATTTAAATTATTTA  |
| M00162 | V\$OCT1_06 | 0.80429<br>7    | 5070 | (-)                 | CWNAWTKWSATRYN                          | TAAATGATATTTAA          |
| M00138 | V\$OCT1_04 | 0.84671<br>7    | 5071 | (-)                 | NNNNNNNNWATGCAAATNNNW<br>NNW            | AAATGATATTTAAATTATTTAA  |
| M00135 | V\$OCT1_01 | 0.73407<br>1    | 5072 | (+)                 | NNNNWTATGCAAATNTNNN                     | AATGATATTTAAATTATTT     |
| M00136 | V\$OCT1_02 | 0.79453<br>2    | 5072 | (+)                 | NNGAATATKCANNNN                         | AATGATATTTAAATT         |
| M00135 | V\$OCT1_01 | 0.7438<br>5073  | (-)  | NNNNWTATGCAAATNTNNN | ATGATATTTAAATTATTTT                     |                         |
| M00195 | V\$OCT1_Q6 | 0.80431<br>2    | 5074 | (+)                 | NNNNATGCAAATNAN                         | TGATATTTAAATTAT         |

|        |            |                    |      |     |                       |                         |
|--------|------------|--------------------|------|-----|-----------------------|-------------------------|
| M00162 | V\$OCT1_06 | 0.84765<br>6       | 5075 | (+) | CWNAWTKWSATRYN        | GATATTTAAATTAT          |
| M00162 | V\$OCT1_06 | 0.91679<br>7       | 5075 | (-) | CWNAWTKWSATRYN        | GATATTTAAATTAT          |
| M00248 | V\$OCT1_07 | 0.87258<br>9       | 5075 | (+) | TNTATGNTAATT          | GATATTTAAATT            |
| M00138 | V\$OCT1_04 | 0.81200<br>3       | 5079 | (+) | NNNNNNNNWATGCAAATNNNW | TTTAAATTATTTTAAAGTTACCT |
| M00138 | V\$OCT1_04 | 0.78168<br>1       | 5081 | (-) | NNW                   | TAAATTATTTTAAAGTTACCTCA |
| M00162 | V\$OCT1_06 | 0.83945<br>3       | 5084 | (+) | NNNNNNNNWATGCAAATNNNW | ATTATTTTAAAGTT          |
| M00162 | V\$OCT1_06 | 0.81875<br>0.83945 | 5086 | (-) | CWNAWTKWSATRYN        | TATTTTAAAGTTAC          |
| M00162 | V\$OCT1_06 | 3                  | 5097 | (-) | CWNAWTKWSATRYN        | TACCTCAAAATCAT          |
| M00162 | V\$OCT1_06 | 0.87890<br>6       | 5103 | (-) | CWNAWTKWSATRYN        | AAAATCATAATTTG          |
| M00137 | V\$OCT1_03 | 0.84512<br>1       | 5106 | (+) | NNNRTAATNANNN         | ATCATAATTTGCA           |
| M00136 | V\$OCT1_02 | 0.78180<br>8       | 5108 | (+) | NNGAATATKCANNNN       | CATAATTTGCAACCT         |
| M00195 | V\$OCT1_Q6 | 0.82450<br>9       | 5109 | (-) | NNNNATGCAAATNAN       | ATAATTTGCAACCTA         |
| M00137 | V\$OCT1_03 | 0.84116<br>9       | 5137 | (+) | NNNRTAATNANNN         | TTGACAAAGAGAA           |
| M00138 | V\$OCT1_04 | 0.79171<br>9       | 5148 | (+) | NNNNNNNNWATGCAAATNNNW | AATTTTAAAGGGAAAAACAGAGT |
| M00138 | V\$OCT1_04 | 0.87683<br>0.77947 | 5178 | (+) | NNW                   | TCAAGATAATGAAAATACGAAAA |
| M00135 | V\$OCT1_01 | 3                  | 5180 | (+) | NNNNWTATGCAAATNTNNN   | AAGATAATGAAAATACGAA     |
| M00137 | V\$OCT1_03 | 0.89766<br>9       | 5180 | (+) | NNNRTAATNANNN         | AAGATAATGAAAA           |
| M00195 | V\$OCT1_Q6 | 0.85207<br>4       | 5182 | (+) | NNNNATGCAAATNAN       | GATAATGAAAATACG         |
| M00161 | V\$OCT1_05 | 0.85837<br>6       | 5183 | (-) | MKNATTTGCATAYY        | ATAATGAAAATACG          |
| M00162 | V\$OCT1_06 | 0.86601<br>6       | 5183 | (-) | CWNAWTKWSATRYN        | ATAATGAAAATACG          |
| M00248 | V\$OCT1_07 | 0.79181<br>7       | 5185 | (-) | TNTATGNTAATT          | AATGAAAATACG            |
| M00138 | V\$OCT1_04 | 0.80593<br>9       | 5186 | (+) | NNNNNNNNWATGCAAATNNNW | ATGAAAATACGAAAATTTTCTTT |
| M00135 | V\$OCT1_01 | 0.76879<br>1       | 5188 | (+) | NNW                   | GAAAATACGAAAATTTTCT     |
| M00162 | V\$OCT1_06 | 0.86015<br>6       | 5191 | (-) | NNNNWTATGCAAATNTNNN   | AATACGAAAATTTT          |
| M00162 | V\$OCT1_06 | 0.87578<br>1       | 5259 | (+) | CWNAWTKWSATRYN        | AAAAATTTCTCTGTA         |
| M00162 | V\$OCT1_06 | 0.82148<br>4       | 5290 | (-) | CWNAWTKWSATRYN        | GAACCTTCAAAATG          |
| M00162 | V\$OCT1_06 | 0.82109<br>4       | 5322 | (+) | CWNAWTKWSATRYN        | GAATTCTAAATATT          |
| M00162 | V\$OCT1_06 | 0.83437<br>5       | 5322 | (-) | CWNAWTKWSATRYN        | GAATTCTAAATATT          |
| M00136 | V\$OCT1_02 | 0.82674<br>6       | 5324 | (-) | NNGAATATKCANNNN       | ATTCTAAATATTGAT         |
| M00136 | V\$OCT1_02 | 0.77287<br>5       | 5327 | (+) | NNGAATATKCANNNN       | CTAAATATTGATTTT         |
| M00135 | V\$OCT1_01 | 0.74055<br>7       | 5348 | (+) | NNNNWTATGCAAATNTNNN   | TTAACTTTGCAACTGTGAA     |
| M00138 | V\$OCT1_04 | 0.80677<br>5       | 5370 | (-) | NNNNNNNNWATGCAAATNNNW | ACAAGGCATTAGTATAAATGAAT |
| M00135 | V\$OCT1_01 | 0.80255<br>6       | 5372 | (-) | NNW                   | AAGGCATTAGTATAAATGA     |

|        |            |                    |      |     |                                           |                          |
|--------|------------|--------------------|------|-----|-------------------------------------------|--------------------------|
| M00248 | V\$OCT1_07 | 0.80029<br>7       | 5376 | (-) | TNTATGNTAATT                              | CATTAGTATAAA             |
| M00162 | V\$OCT1_06 | 0.83437<br>5       | 5384 | (-) | CWNAWTKWSATRYN                            | TAAATGAATGAATG           |
| M00162 | V\$OCT1_06 | 0.84218<br>7       | 5404 | (-) | CWNAWTKWSATRYN                            | AGAATGAATTAGTG           |
| M00162 | V\$OCT1_06 | 0.83945<br>3       | 5477 | (-) | CWNAWTKWSATRYN                            | AGTACTACATAAAG           |
| M00162 | V\$OCT1_06 | 0.80429<br>7       | 5484 | (+) | CWNAWTKWSATRYN                            | CATAAAGCAATATA           |
| M00138 | V\$OCT1_04 | 0.83019<br>7       | 5506 | (-) | NNNNNNNNWATGCAAATNNNW<br>NNW              | AAGAATGTTTTACATGTCAATTT  |
| M00162 | V\$OCT1_06 | 0.90625            | 5510 | (+) | CWNAWTKWSATRYN                            | ATGTTTTACATGTC           |
| M00195 | V\$OCT1_Q6 | 0.80786<br>0.80217 | 5510 | (-) | NNNNNATGCAAATNAN<br>NNNNNNNNWATGCAAATNNNW | ATGTTTTACATGTCA          |
| M00138 | V\$OCT1_04 | 0.74170<br>5       | 5511 | (+) | NNW                                       | TGTTTTACATGTCAATTTGATCA  |
| M00135 | V\$OCT1_01 | 0.99218<br>2       | 5513 | (+) | NNNNWTATGCAAATNTNNN                       | TTTTACATGTCAATTTGAT      |
| M00162 | V\$OCT1_06 | 0.84206<br>8       | 5516 | (-) | CWNAWTKWSATRYN                            | TACATGTCAATTTG           |
| M00248 | V\$OCT1_07 | 0.80820<br>1       | 5516 | (+) | TNTATGNTAATT                              | TACATGTCAATT             |
| M00162 | V\$OCT1_06 | 0.81806<br>3       | 5538 | (-) | CWNAWTKWSATRYN                            | TGTTTTTCAAAGTT           |
| M00138 | V\$OCT1_04 | 0.85262<br>8       | 5558 | (+) | NNNNNNNNWATGCAAATNNNW<br>NNW              | GCTTTGTTATTAACAAAAAACATA |
| M00137 | V\$OCT1_03 | 0.79732<br>7       | 5561 | (-) | NNNRTAATNANNN                             | TTGTTATTAACAAA           |
| M00248 | V\$OCT1_07 | 0.89062<br>9       | 5571 | (-) | TNTATGNTAATT                              | AAAAAACATACA             |
| M00162 | V\$OCT1_06 | 0.79732<br>5       | 5583 | (-) | CWNAWTKWSATRYN                            | GGTATTTAAAAAAC           |
| M00248 | V\$OCT1_07 | 0.85236<br>9       | 5590 | (-) | TNTATGNTAATT                              | AAAAAACATACA             |
| M00138 | V\$OCT1_04 | 0.82656<br>3       | 5597 | (+) | NNNNNNNNWATGCAAATNNNW<br>NNW              | ATACAGGTATTTAAAAATTACA   |
| M00162 | V\$OCT1_06 | 0.89843<br>2       | 5602 | (+) | CWNAWTKWSATRYN                            | GGTATTTAAAAATT           |
| M00162 | V\$OCT1_06 | 0.83709<br>7       | 5602 | (-) | CWNAWTKWSATRYN                            | GGTATTTAAAAATT           |
| M00138 | V\$OCT1_04 | 0.81375<br>7       | 5606 | (-) | NNNNNNNNWATGCAAATNNNW<br>NNW              | TTTAAAAATTTACAGCTTCTTAA  |
| M00136 | V\$OCT1_02 | 0.84813<br>2       | 5621 | (-) | NNGAATATKCANNNN                           | CTTCTTAATATTCTT          |
| M00136 | V\$OCT1_02 | 0.81328<br>2       | 5624 | (+) | NNGAATATKCANNNN                           | CTTAATATTCTTCAT          |
| M00162 | V\$OCT1_06 | 0.78628<br>1       | 5628 | (+) | CWNAWTKWSATRYN                            | ATATTCTTCATACC           |
| M00138 | V\$OCT1_04 | 0.80238<br>2       | 5694 | (+) | NNNNNNNNWATGCAAATNNNW<br>NNW              | GATTCTTTATTTTAAAACTATTA  |
| M00138 | V\$OCT1_04 | 0.80238<br>4       | 5697 | (-) | NNNNNNNNWATGCAAATNNNW<br>NNW              | TCTTTATTTTAAAACTATTAAAT  |
| M00162 | V\$OCT1_06 | 0.90625<br>0.80429 | 5709 | (+) | CWNAWTKWSATRYN                            | AACTATTAAATATA           |
| M00162 | V\$OCT1_06 | 0.80363<br>7       | 5717 | (-) | CWNAWTKWSATRYN                            | AATATAATATAATG           |
| M00138 | V\$OCT1_04 | 0.89016<br>9       | 5720 | (+) | NNNNNNNNWATGCAAATNNNW<br>NNW              | ATAATATAATGAAAAGAAAGAAG  |
| M00137 | V\$OCT1_03 | 0.81765<br>2       | 5722 | (+) | NNNRTAATNANNN                             | AATATAATGAAAA            |
| M00138 | V\$OCT1_04 | 0.78920<br>0.81765 | 5743 | (+) | NNNNNNNNWATGCAAATNNNW<br>NNW              | TAAAAAATATCCTAATCAAATAT  |
| M00135 | V\$OCT1_01 | 0.78920<br>3       | 5745 | (+) | NNNNWTATGCAAATNTNNN                       | AAAAATATCCTAATCAAAT      |

|        |            |                    |      |     |                                          |                                            |
|--------|------------|--------------------|------|-----|------------------------------------------|--------------------------------------------|
| M00136 | V\$OCT1_02 | 0.77693<br>6       | 5745 | (+) | NNGAATATKCANNNN                          | AAAAATATCCTAATC                            |
| M00195 | V\$OCT1_Q6 | 0.81222<br>7       | 5747 | (+) | NNNNATGCAAATNAN                          | AAATATCCTAATCAA                            |
| M00137 | V\$OCT1_03 | 0.89134<br>7       | 5751 | (+) | NNNRTAATNANNN                            | ATCCTAATCAAAT                              |
| M00162 | V\$OCT1_06 | 0.80468<br>7       | 5753 | (+) | CWNAWTKWSATRYN                           | CCTAATCAAATATC                             |
| M00162 | V\$OCT1_06 | 0.80078<br>1       | 5754 | (-) | CWNAWTKWSATRYN                           | CTAATCAAATATCC                             |
| M00136 | V\$OCT1_02 | 0.79074<br>2       | 5755 | (-) | NNGAATATKCANNNN<br>NNNNNNNNWATGCAAATNNNW | TAATCAAATATCCTT<br>TCCTTTAAGTATCCTAATCAAGA |
| M00138 | V\$OCT1_04 | 0.78921<br>0.79187 | 5765 | (-) | NNW                                      |                                            |
| M00135 | V\$OCT1_01 | 3                  | 5769 | (+) | NNNNWTATGCAAATNTNNN                      | TTAAGTATCCTAATCAAGA                        |
| M00195 | V\$OCT1_Q6 | 0.80458<br>5       | 5771 | (+) | NNNNATGCAAATNAN                          | AAGTATCCTAATCAA                            |
| M00137 | V\$OCT1_03 | 0.89095<br>2       | 5775 | (+) | NNNRTAATNANNN                            | ATCCTAATCAAGA                              |
| M00162 | V\$OCT1_06 | 0.82109<br>4       | 5788 | (-) | CWNAWTKWSATRYN                           | TGAATGAACAATTC                             |
| M00162 | V\$OCT1_06 | 0.81367<br>2       | 5810 | (-) | CWNAWTKWSATRYN                           | CAAAACTAAAACAG                             |
| M00162 | V\$OCT1_06 | 0.82109<br>4       | 5823 | (-) | CWNAWTKWSATRYN                           | GATATCTCTAATTC                             |
| M00138 | V\$OCT1_04 | 0.82517<br>8       | 5825 | (+) | NNNNNNNNWATGCAAATNNNW<br>NNW             | TATCTCTAATTCAAAGAAAAAAA                    |
| M00138 | V\$OCT1_04 | 0.79276<br>5       | 5841 | (+) | NNNNNNNNWATGCAAATNNNW<br>NNW             | AAAAAAAGATGCAACATGTATGT                    |
| M00136 | V\$OCT1_02 | 0.78641<br>0.80429 | 5843 | (+) | NNGAATATKCANNNN                          | AAAAAGATGCAACAT                            |
| M00162 | V\$OCT1_06 | 7                  | 5868 | (+) | CWNAWTKWSATRYN                           | CAAAATTGGCTGGA                             |
| M00162 | V\$OCT1_06 | 0.81367<br>2       | 5934 | (+) | CWNAWTKWSATRYN                           | CTCTCTGTACTGCT                             |
| M00162 | V\$OCT1_06 | 0.80078<br>1       | 5971 | (-) | CWNAWTKWSATRYN                           | CAAACTACATGGAG                             |
| M00136 | V\$OCT1_02 | 0.77801<br>8       | 5979 | (-) | NNGAATATKCANNNN                          | ATGGAGAAAATTCAT                            |
| M00136 | V\$OCT1_02 | 0.89171<br>6       | 5982 | (+) | NNGAATATKCANNNN                          | GAGAAAATTCATTTT                            |
| M00162 | V\$OCT1_06 | 0.83437<br>5       | 5983 | (+) | CWNAWTKWSATRYN                           | AGAAAATTCATTTT                             |
| M00162 | V\$OCT1_06 | 0.85546<br>9       | 5984 | (-) | CWNAWTKWSATRYN                           | GAAAATTCATTTTG                             |
| M00138 | V\$OCT1_04 | 0.80991<br>2       | 5986 | (-) | NNNNNNNNWATGCAAATNNNW<br>NNW             | AAATTCATTTTGCTTAAATATT                     |
| M00135 | V\$OCT1_01 | 0.77985<br>5       | 5988 | (-) | NNNNWTATGCAAATNTNNN                      | ATTCATTTTGCTTAAATAT                        |
| M00138 | V\$OCT1_04 | 0.80531<br>2       | 5990 | (-) | NNNNNNNNWATGCAAATNNNW<br>NNW             | TCATTTTGCTTAAATATTATAC                     |
| M00136 | V\$OCT1_02 | 0.84055<br>2       | 5996 | (-) | NNGAATATKCANNNN                          | TGCTTAAATATTTAT                            |
| M00138 | V\$OCT1_04 | 0.82434<br>1       | 5996 | (-) | NNNNNNNNWATGCAAATNNNW<br>NNW             | TGCTTAAATATTTATACATTATT                    |
| M00136 | V\$OCT1_02 | 0.81023<br>3       | 5999 | (+) | NNGAATATKCANNNN                          | TTAAATATTATACA                             |
| M00138 | V\$OCT1_04 | 0.85445<br>4       | 6000 | (-) | NNNNNNNNWATGCAAATNNNW<br>NNW             | TAAATATTATACATTATTGAAC                     |
| M00137 | V\$OCT1_03 | 0.85341<br>8       | 6001 | (-) | NNNRTAATNANNN                            | AAATATTATACA                               |
| M00136 | V\$OCT1_02 | 0.77368<br>7       | 6044 | (-) | NNGAATATKCANNNN                          | TTGTCACATAATCTT                            |
| M00137 | V\$OCT1_03 | 0.86685<br>1       | 6048 | (+) | NNNRTAATNANNN                            | CACATAATCTTTA                              |

|        |            |         |      |     |                       |                         |
|--------|------------|---------|------|-----|-----------------------|-------------------------|
|        |            | 0.80859 |      |     |                       |                         |
| M00162 | V\$OCT1_06 | 4       | 6058 | (-) | CWNAWTKWSATRYN        | TTAATCCAATGCTC          |
|        |            | 0.79067 |      |     | NNNNNNNNWATGCAAATNNNW |                         |
| M00138 | V\$OCT1_04 | 3       | 6117 | (+) | NNW                   | TTAGTTAAAGGAAAATGTAGAAT |
|        |            | 0.79067 |      |     | NNNNNNNNWATGCAAATNNNW |                         |
| M00138 | V\$OCT1_04 | 3       | 6123 | (+) | NNW                   | AAAGGAAAATGTAGAATATTTAC |
|        |            | 0.78532 |      |     |                       |                         |
| M00136 | V\$OCT1_02 | 8       | 6125 | (+) | NNGAATATKCANNNN       | AGGAAAATGTAGAAT         |
|        |            | 0.78941 |      |     | NNNNNNNNWATGCAAATNNNW |                         |
| M00138 | V\$OCT1_04 | 9       | 6125 | (-) | NNW                   | AGGAAAATGTAGAATATTTACAA |
|        |            | 0.82109 |      |     |                       |                         |
| M00162 | V\$OCT1_06 | 4       | 6128 | (-) | CWNAWTKWSATRYN        | AAAATGTAGAATAT          |
|        |            | 0.83622 |      |     |                       |                         |
| M00136 | V\$OCT1_02 | 1       | 6131 | (-) | NNGAATATKCANNNN       | ATGTAGAATATTTAC         |
|        |            | 0.84461 |      |     |                       |                         |
| M00136 | V\$OCT1_02 | 3       | 6134 | (+) | NNGAATATKCANNNN       | TAGAATATTTACAAT         |
|        |            | 0.79046 |      |     | NNNNNNNNWATGCAAATNNNW |                         |
| M00138 | V\$OCT1_04 | 4       | 6134 | (-) | NNW                   | TAGAATATTTACAATGATTTATC |
|        |            | 0.87475 |      |     |                       |                         |
| M00137 | V\$OCT1_03 | 3       | 6141 | (+) | NNNRTAATNANNN         | TTTACAATGATTT           |
|        |            | 0.75009 |      |     |                       |                         |
| M00135 | V\$OCT1_01 | 5       | 6158 | (+) | NNNNWTATGCAAATNTNNN   | AAACATATAAAAATCTACA     |
|        |            | 0.86289 |      |     |                       |                         |
| M00162 | V\$OCT1_06 | 1       | 6159 | (-) | CWNAWTKWSATRYN        | AACATATAAAAATC          |
|        |            | 0.78419 |      |     | NNNNNNNNWATGCAAATNNNW |                         |
| M00138 | V\$OCT1_04 | 1       | 6163 | (-) | NNW                   | TATAAAAATCTACAGCACTTTTT |
|        |            | 0.80039 |      |     |                       |                         |
| M00162 | V\$OCT1_06 | 1       | 6167 | (-) | CWNAWTKWSATRYN        | AAAATCTACAGCAC          |
|        |            | 0.87265 |      |     |                       |                         |
| M00162 | V\$OCT1_06 | 6       | 6190 | (+) | CWNAWTKWSATRYN        | AGCTCTGAAATGCA          |
|        |            | 0.81723 |      |     | NNNNNNNNWATGCAAATNNNW |                         |
| M00138 | V\$OCT1_04 | 1       | 6191 | (+) | NNW                   | GCTCTGAAATGCAGATTAAAGAG |
|        |            | 0.73845 |      |     |                       |                         |
| M00135 | V\$OCT1_01 | 9       | 6193 | (+) | NNNNWTATGCAAATNTNNN   | TCTGAAATGCAGATTAAAG     |
|        |            | 0.80649 |      |     |                       |                         |
| M00195 | V\$OCT1_Q6 | 6       | 6195 | (+) | NNNNATGCAAATNAN       | TGAAATGCAGATTAA         |
|        |            | 0.78289 |      |     |                       |                         |
| M00136 | V\$OCT1_02 | 1       | 6196 | (-) | NNGAATATKCANNNN       | GAAATGCAGATTAAA         |
|        |            | 0.79548 |      |     | NNNNNNNNWATGCAAATNNNW |                         |
| M00138 | V\$OCT1_04 | 3       | 6204 | (+) | NNW                   | GATTAAAGAGGAAAATTCTTCAG |
|        |            | 0.78478 |      |     |                       |                         |
| M00136 | V\$OCT1_02 | 6       | 6209 | (-) | NNGAATATKCANNNN       | AAGAGGAAAATTCTT         |
|        |            | 0.80265 |      |     |                       |                         |
| M00136 | V\$OCT1_02 | 3       | 6212 | (+) | NNGAATATKCANNNN       | AGGAAAATTCTTCAG         |
|        |            | 0.79046 |      |     | NNNNNNNNWATGCAAATNNNW |                         |
| M00138 | V\$OCT1_04 | 4       | 6239 | (+) | NNW                   | GTAGGCTTTTTTAAAATTTTCCT |
|        |            | 0.80384 |      |     | NNNNNNNNWATGCAAATNNNW |                         |
| M00138 | V\$OCT1_04 | 8       | 6241 | (-) | NNW                   | AGGCTTTTTTAAAATTTTCCTTA |
|        |            | 0.82656 |      |     |                       |                         |
| M00162 | V\$OCT1_06 | 2       | 6244 | (+) | CWNAWTKWSATRYN        | CTTTTTTAAAATTT          |
|        |            |         |      |     | NNNNNNNNWATGCAAATNNNW |                         |
| M00138 | V\$OCT1_04 | 0.81284 | 6247 | (-) | NNW                   | TTTTAAAATTTTCCTTACCAGTT |
|        |            | 0.85144 |      |     |                       |                         |
| M00137 | V\$OCT1_03 | 2       | 6255 | (-) | NNNRTAATNANNN         | TTTCCTTACCAG            |
|        |            |         |      |     | NNNNNNNNWATGCAAATNNNW |                         |
| M00138 | V\$OCT1_04 | 0.78921 | 6289 | (-) | NNW                   | TATTCCTTTGGCATCCATTTTA  |
|        |            | 0.83437 |      |     |                       |                         |
| M00162 | V\$OCT1_06 | 5       | 6299 | (-) | CWNAWTKWSATRYN        | GGCATCCATTTTAT          |
|        |            | 0.80859 |      |     |                       |                         |
| M00162 | V\$OCT1_06 | 4       | 6302 | (+) | CWNAWTKWSATRYN        | ATCCATTTTATTTG          |
|        |            | 0.89315 |      |     |                       |                         |
| M00248 | V\$OCT1_07 | 2       | 6310 | (+) | TNTATGNTAATT          | TATTTGGTAATT            |
|        |            | 0.80384 |      |     | NNNNNNNNWATGCAAATNNNW |                         |
| M00138 | V\$OCT1_04 | 8       | 6312 | (-) | NNW                   | TTTGGTAATTATCATTTTATATT |
|        |            | 0.89845 |      |     |                       |                         |
| M00137 | V\$OCT1_03 | 9       | 6313 | (+) | NNNRTAATNANNN         | TTGGTAATTATCA           |

|        |            |         |      |     |                       |                          |
|--------|------------|---------|------|-----|-----------------------|--------------------------|
|        |            | 0.74399 |      |     |                       |                          |
| M00135 | V\$OCT1_01 | 1       | 6314 | (-) | NNNNWTATGCAAATNTNNN   | TGGTAATTATCATTTTATA      |
|        |            | 0.86882 |      |     |                       |                          |
| M00137 | V\$OCT1_03 | 7       | 6314 | (-) | NNNRTAATNANNN         | TGGTAATTATCAT            |
|        |            | 0.91565 |      |     |                       |                          |
| M00161 | V\$OCT1_05 | 7       | 6316 | (+) | MKNATTTGCATAYY        | GTAATTATCATTTT           |
|        |            | 0.85273 |      |     |                       |                          |
| M00162 | V\$OCT1_06 | 4       | 6316 | (+) | CWNAWTKWSATRYN        | GTAATTATCATTTT           |
|        |            | 0.81550 |      |     |                       |                          |
| M00195 | V\$OCT1_Q6 | 2       | 6316 | (-) | NNNNATGCAAATNAN       | GTAATTATCATTTTA          |
|        |            | 0.84333 |      |     |                       |                          |
| M00248 | V\$OCT1_07 | 3       | 6318 | (-) | TNTATGNTAATT          | AATTATCATTTT             |
|        |            | 0.78649 |      |     | NNNNNNNNWATGCAAATNNNW |                          |
| M00138 | V\$OCT1_04 | 1       | 6319 | (-) | NNW                   | ATTATCATTTTATATTGGAATGT  |
|        |            | 0.80761 |      |     | NNNNNNNNWATGCAAATNNNW |                          |
| M00138 | V\$OCT1_04 | 2       | 6325 | (-) | NNW                   | ATTTTATATTGGAATGTTTGCA   |
|        |            | 0.86835 |      |     |                       |                          |
| M00162 | V\$OCT1_06 | 9       | 6329 | (+) | CWNAWTKWSATRYN        | TATATTGGAATGTT           |
|        |            | 0.79652 |      |     | NNNNNNNNWATGCAAATNNNW |                          |
| M00138 | V\$OCT1_04 | 9       | 6334 | (-) | NNW                   | TGGAATGTTTGTTCATGAAAAATA |
|        |            | 0.83437 |      |     |                       |                          |
| M00162 | V\$OCT1_06 | 5       | 6338 | (+) | CWNAWTKWSATRYN        | ATGTTTGTTCATGAA          |
|        |            | 0.80844 |      |     | NNNNNNNNWATGCAAATNNNW |                          |
| M00138 | V\$OCT1_04 | 8       | 6339 | (+) | NNW                   | TGTTTGTTCATGAAAAATAAAGTT |
|        |            | 0.82656 |      |     |                       |                          |
| M00162 | V\$OCT1_06 | 2       | 6354 | (+) | CWNAWTKWSATRYN        | ATAAAGTTAATTCT           |
|        |            | 0.81704 |      |     |                       |                          |
| M00248 | V\$OCT1_07 | 5       | 6354 | (+) | TNTATGNTAATT          | ATAAAGTTAATT             |
|        |            | 0.82929 |      |     |                       |                          |
| M00162 | V\$OCT1_06 | 7       | 6355 | (-) | CWNAWTKWSATRYN        | TAAAGTTAATTCTC           |
|        |            | 0.78080 |      |     |                       |                          |
| M00135 | V\$OCT1_01 | 9       | 6393 | (+) | NNNNWTATGCAAATNTNNN   | TGGAAGATGCTAAGGTAAG      |
|        |            | 0.79569 |      |     | NNNNNNNNWATGCAAATNNNW |                          |
| M00138 | V\$OCT1_04 | 2       | 6405 | (-) | NNW                   | AGGTAAGATCTTTATTTTAATAA  |
|        |            | 0.78586 |      |     | NNNNNNNNWATGCAAATNNNW |                          |
| M00138 | V\$OCT1_04 | 4       | 6410 | (+) | NNW                   | AGATCTTTATTTTAATAAACTCT  |
|        |            | 0.80175 |      |     | NNNNNNNNWATGCAAATNNNW |                          |
| M00138 | V\$OCT1_04 | 7       | 6411 | (-) | NNW                   | GATCTTTATTTTAATAAACTCTA  |
|        |            | 0.73235 |      |     |                       |                          |
| M00135 | V\$OCT1_01 | 4       | 6412 | (+) | NNNNWTATGCAAATNTNNN   | ATCTTTATTTTAATAAACT      |
|        |            | 0.83167 |      |     |                       |                          |
| M00248 | V\$OCT1_07 | 3       | 6415 | (+) | TNTATGNTAATT          | TTTATTTTAATA             |
|        |            | 0.85507 |      |     |                       |                          |
| M00162 | V\$OCT1_06 | 8       | 6438 | (-) | CWNAWTKWSATRYN        | TATATATCATAAAC           |
|        |            | 0.87040 |      |     |                       |                          |
| M00137 | V\$OCT1_03 | 7       | 6443 | (+) | NNNRTAATNANNN         | ATCATAACAAGA             |
|        |            | 0.81367 |      |     |                       |                          |
| M00162 | V\$OCT1_06 | 2       | 6522 | (-) | CWNAWTKWSATRYN        | CATACCCAAGAATG           |
|        |            | 0.83945 |      |     |                       |                          |
| M00162 | V\$OCT1_06 | 3       | 6566 | (+) | CWNAWTKWSATRYN        | GGAAATTTGACATT           |
|        |            | 0.91914 |      |     |                       |                          |
| M00162 | V\$OCT1_06 | 1       | 6568 | (+) | CWNAWTKWSATRYN        | AAATTTGACATTTA           |
|        |            | 0.86015 |      |     |                       |                          |
| M00162 | V\$OCT1_06 | 6       | 6569 | (-) | CWNAWTKWSATRYN        | AATTTGACATTTAC           |
|        |            | 0.82350 |      |     | NNNNNNNNWATGCAAATNNNW |                          |
| M00138 | V\$OCT1_04 | 5       | 6570 | (-) | NNW                   | ATTTGACATTTACATGATCAGGA  |
|        |            | 0.83937 |      |     |                       |                          |
| M00135 | V\$OCT1_01 | 4       | 6572 | (-) | NNNNWTATGCAAATNTNNN   | TTGACATTTACATGATCAG      |
|        |            | 0.87617 |      |     |                       |                          |
| M00162 | V\$OCT1_06 | 2       | 6574 | (+) | CWNAWTKWSATRYN        | GACATTTACATGAT           |
|        |            | 0.82148 |      |     |                       |                          |
| M00162 | V\$OCT1_06 | 4       | 6574 | (-) | CWNAWTKWSATRYN        | GACATTTACATGAT           |
|        |            | 0.81086 |      |     |                       |                          |
| M00195 | V\$OCT1_Q6 | 2       | 6574 | (-) | NNNNATGCAAATNAN       | GACATTTACATGATC          |
|        |            | 0.79308 |      |     |                       |                          |
| M00248 | V\$OCT1_07 | 9       | 6576 | (-) | TNTATGNTAATT          | CATTTACATGAT             |



|        |            |              |      |     |                              |                           |
|--------|------------|--------------|------|-----|------------------------------|---------------------------|
| M00135 | V\$OCT1_01 | 0.73159<br>1 | 6592 | (-) | NNNNWTATGCAAATNTNNN          | AGAAACTTTGCTTCTTTAT       |
| M00162 | V\$OCT1_06 | 0.82656<br>2 | 6593 | (+) | CWNAWTKWSATRYN               | GAAACTTTGCTTCT            |
| M00137 | V\$OCT1_03 | 0.84037<br>9 | 6601 | (-) | NNNRTAATNANNN                | GCTTCTTTATTAA             |
| M00138 | V\$OCT1_04 | 0.82768<br>7 | 6601 | (+) | NNNNNNNWTATGCAAATNNNW<br>NNW | GCTTCTTTATTAATAAATCAAGAGT |
| M00162 | V\$OCT1_06 | 0.83437<br>5 | 6605 | (+) | CWNAWTKWSATRYN               | CTTTATTAATAAATCA          |
| M00162 | V\$OCT1_06 | 0.85273<br>4 | 6625 | (-) | CWNAWTKWSATRYN               | AAAAGCAAAATGTG            |
| M00138 | V\$OCT1_04 | 0.78314<br>5 | 6627 | (-) | NNNNNNNWTATGCAAATNNNW<br>NNW | AAGCAAAATGTGCATGAGTGTTT   |
| M00135 | V\$OCT1_01 | 0.79053<br>8 | 6629 | (-) | NNNNWTATGCAAATNTNNN          | GCAAAATGTGCATGAGTGT       |
| M00138 | V\$OCT1_04 | 0.81095<br>8 | 6638 | (+) | NNNNNNNWTATGCAAATNNNW<br>NNW | GCATGAGTGTTTAAAAATGAACA   |
| M00162 | V\$OCT1_06 | 0.84726<br>6 | 6643 | (-) | CWNAWTKWSATRYN               | AGTGTTTAAAAATG            |
| M00162 | V\$OCT1_06 | 0.86054<br>7 | 6651 | (-) | CWNAWTKWSATRYN               | AAAATGAACATCTG            |
| M00162 | V\$OCT1_06 | 0.81328<br>1 | 6663 | (-) | CWNAWTKWSATRYN               | TGACTCAAAAAATT            |
| M00162 | V\$OCT1_06 | 0.80078<br>1 | 6671 | (-) | CWNAWTKWSATRYN               | AAAATTAATAACCT            |
| M00162 | V\$OCT1_06 | 0.82148<br>4 | 6685 | (+) | CWNAWTKWSATRYN               | GTTTCTGTCATCCC            |
| M00162 | V\$OCT1_06 | 0.84218<br>7 | 6747 | (+) | CWNAWTKWSATRYN               | AAGAATTTATTGCA            |
| M00162 | V\$OCT1_06 | 0.82148<br>4 | 6748 | (-) | CWNAWTKWSATRYN               | AGAATTTATTGCAG            |
| M00137 | V\$OCT1_03 | 0.84788<br>6 | 6758 | (+) | NNNRTAATNANNN                | GCAGCAATTATGT             |
| M00162 | V\$OCT1_06 | 0.81367<br>2 | 6774 | (+) | CWNAWTKWSATRYN               | ATCAATGGGCTATG            |
| M00162 | V\$OCT1_06 | 0.82929<br>7 | 6800 | (+) | CWNAWTKWSATRYN               | CACTCAGTCATGCC            |
| M00162 | V\$OCT1_06 | 0.89335<br>9 | 6838 | (-) | CWNAWTKWSATRYN               | AGCATGCCAGGCTT            |
| M00162 | V\$OCT1_06 | 0.83437<br>5 | 6899 | (+) | CWNAWTKWSATRYN               | CAGTCAGTGATGCT            |
| M00162 | V\$OCT1_06 | 0.80859<br>4 | 6933 | (-) | CWNAWTKWSATRYN               | GACATCCCTGTCTC            |
| M00135 | V\$OCT1_01 | 0.75600<br>9 | 6990 | (-) | NNNNWTATGCAAATNTNNN          | CGGTTCTTGCATCAGGTG        |
| M00195 | V\$OCT1_Q6 | 0.83597<br>2 | 6992 | (-) | NNNNATGCAAATNAN              | GTTCTTTGCATCAGG           |
| M00162 | V\$OCT1_06 | 0.80078<br>1 | 7014 | (+) | CWNAWTKWSATRYN               | AGTATTGAACTTC             |
| M00248 | V\$OCT1_07 | 0.79605<br>7 | 7014 | (+) | TNTATGNTAATT                 | AGTATTGAACT               |
| M00135 | V\$OCT1_01 | 0.73292<br>6 | 7026 | (-) | NNNNWTATGCAAATNTNNN          | TCAGCTTTAGCATCAGTTC       |
| M00136 | V\$OCT1_02 | 0.93015<br>7 | 7047 | (-) | NNGAATATKCANNNN              | CCAATGAATATTCAG           |
| M00136 | V\$OCT1_02 | 0.96318<br>4 | 7050 | (+) | NNGAATATKCANNNN              | ATGAATATTCAGGAT           |
| M00162 | V\$OCT1_06 | 0.81367<br>2 | 7053 | (-) | CWNAWTKWSATRYN               | AATATTCAGGATTG            |
| M00135 | V\$OCT1_01 | 0.74284<br>6 | 7093 | (-) | NNNNWTATGCAAATNTNNN          | TCTCCAGTAGCATGTTGGG       |
| M00162 | V\$OCT1_06 | 0.80859<br>4 | 7133 | (-) | CWNAWTKWSATRYN               | CATCTTTCAGTGTC            |
| M00135 | V\$OCT1_01 | 0.75734<br>5 | 7154 | (-) | NNNNWTATGCAAATNTNNN          | TTAACGTTTTCATACTGTT       |

|        |            |         |      |     |                        |                         |
|--------|------------|---------|------|-----|------------------------|-------------------------|
|        |            | 0.85507 |      |     |                        |                         |
| M00162 | V\$OCT1_06 | 8       | 7156 | (+) | CWNAWTKWSATRYN         | AACGTTTTCATACT          |
|        |            | 0.82968 |      |     |                        |                         |
| M00162 | V\$OCT1_06 | 7       | 7209 | (-) | CWNAWTKWSATRYN         | CCCATTCATTCTC           |
|        |            | 0.81577 |      |     |                        |                         |
| M00195 | V\$OCT1_Q6 | 5       | 7248 | (+) | NNNNATGCAATNAN         | AAACATGAAAAAAT          |
|        |            | 0.92421 |      |     |                        |                         |
| M00162 | V\$OCT1_06 | 9       | 7249 | (-) | CWNAWTKWSATRYN         | AACATGAAAAAAT           |
|        |            | 0.82512 |      |     |                        |                         |
| M00136 | V\$OCT1_02 | 2       | 7255 | (+) | NNGAATATKCANNNN        | AAAAAAATTCATTAG         |
|        |            | 0.88463 |      |     |                        |                         |
| M00137 | V\$OCT1_03 | 1       | 7260 | (-) | NNNRTAATNANNN          | AATTCATTAGCCC           |
|        |            | 0.85578 |      |     |                        |                         |
| M00137 | V\$OCT1_03 | 8       | 7277 | (-) | NNNRTAATNANNN          | TACTTTTTACTCA           |
|        |            | 0.79318 |      |     | NNNNNNNNWATGCAAAATNNNW |                         |
| M00138 | V\$OCT1_04 | 3       | 7306 | (-) | NNW                    | ACTATTTGCTGCATATTAGAAT  |
|        |            | 0.86464 |      |     |                        |                         |
| M00136 | V\$OCT1_02 | 5       | 7312 | (-) | NNGAATATKCANNNN        | TTGCTGCATATTAGA         |
|        |            | 0.75276 |      |     |                        |                         |
| M00135 | V\$OCT1_01 | 6       | 7316 | (-) | NNNNWTATGCAAAATNTNNN   | TGCATATTAGAATCAATAT     |
|        |            |         |      |     | NNNNNNNNWATGCAAAATNNNW |                         |
| M00138 | V\$OCT1_04 | 0.78189 | 7319 | (+) | NNW                    | ATATTAGAATCAATATCTTAGTA |
|        |            | 0.82656 |      |     |                        |                         |
| M00162 | V\$OCT1_06 | 2       | 7324 | (-) | CWNAWTKWSATRYN         | AGAATCAATATCTT          |
|        |            |         |      |     |                        |                         |
| M00135 | V\$OCT1_01 | 0.73884 | 7327 | (+) | NNNNWTATGCAAAATNTNNN   | ATCAATATCTTAGTATGTA     |
|        |            | 0.88671 |      |     |                        |                         |
| M00162 | V\$OCT1_06 | 9       | 7330 | (-) | CWNAWTKWSATRYN         | AATATCTTAGTATG          |
|        |            | 0.81210 |      |     |                        |                         |
| M00162 | V\$OCT1_06 | 9       | 7338 | (-) | CWNAWTKWSATRYN         | AGTATGTACTTGGG          |
|        |            | 0.78732 |      |     | NNNNNNNNWATGCAAAATNNNW |                         |
| M00138 | V\$OCT1_04 | 7       | 7356 | (+) | NNW                    | GAAATCAGATCCATATGTAAATA |
|        |            | 0.85487 |      |     | NNNNNNNNWATGCAAAATNNNW |                         |
| M00138 | V\$OCT1_04 | 2       | 7362 | (+) | NNW                    | AGATCCATATGTAAATATGAACA |
|        |            | 0.90995 |      |     |                        |                         |
| M00135 | V\$OCT1_01 | 8       | 7364 | (+) | NNNNWTATGCAAAATNTNNN   | ATCCATATGTAAATATGAA     |
|        |            | 0.81212 |      |     |                        |                         |
| M00136 | V\$OCT1_02 | 8       | 7364 | (+) | NNGAATATKCANNNN        | ATCCATATGTAAATA         |
|        |            | 0.82205 |      |     |                        |                         |
| M00195 | V\$OCT1_Q6 | 2       | 7366 | (+) | NNNNATGCAAAATNAN       | CCATATGTAAATATG         |
|        |            | 0.86054 |      |     |                        |                         |
| M00162 | V\$OCT1_06 | 7       | 7367 | (+) | CWNAWTKWSATRYN         | CATATGTAAATATG          |
|        |            | 0.97148 |      |     |                        |                         |
| M00162 | V\$OCT1_06 | 4       | 7367 | (-) | CWNAWTKWSATRYN         | CATATGTAAATATG          |
|        |            | 0.82170 |      |     |                        |                         |
| M00248 | V\$OCT1_07 | 9       | 7367 | (+) | TNTATGNTAATT           | CATATGTAAATA            |
|        |            | 0.79344 |      |     |                        |                         |
| M00136 | V\$OCT1_02 | 9       | 7369 | (-) | NNGAATATKCANNNN        | TATGTAAATATGAAC         |
|        |            | 0.85776 |      |     |                        |                         |
| M00137 | V\$OCT1_03 | 4       | 7369 | (+) | NNNRTAATNANNN          | TATGTAAATATGA           |
|        |            | 0.82141 |      |     | NNNNNNNNWATGCAAAATNNNW |                         |
| M00138 | V\$OCT1_04 | 4       | 7369 | (-) | NNW                    | TATGTAAATATGAACATCTATGA |
|        |            | 0.76402 |      |     |                        |                         |
| M00135 | V\$OCT1_01 | 1       | 7372 | (+) | NNNNWTATGCAAAATNTNNN   | GTAAATATGAACATCTATG     |
|        |            | 0.77720 |      |     |                        |                         |
| M00136 | V\$OCT1_02 | 6       | 7372 | (+) | NNGAATATKCANNNN        | GTAAATATGAACATC         |
|        |            | 0.81601 |      |     |                        |                         |
| M00162 | V\$OCT1_06 | 6       | 7381 | (-) | CWNAWTKWSATRYN         | AACATCTATGACTT          |
|        |            | 0.79736 |      |     | NNNNNNNNWATGCAAAATNNNW |                         |
| M00138 | V\$OCT1_04 | 5       | 7387 | (+) | NNW                    | TATGACTTAGGAAAAAACTAAA  |
|        |            | 0.86289 |      |     |                        |                         |
| M00162 | V\$OCT1_06 | 1       | 7400 | (+) | CWNAWTKWSATRYN         | AAAAACTAAATGTT          |
|        |            | 0.83437 |      |     |                        |                         |
| M00162 | V\$OCT1_06 | 5       | 7400 | (-) | CWNAWTKWSATRYN         | AAAAACTAAATGTT          |
|        |            | 0.80820 |      |     |                        |                         |
| M00162 | V\$OCT1_06 | 3       | 7401 | (-) | CWNAWTKWSATRYN         | AAAACTAAATGTTT          |

|        |            |         |      |     |                       |                         |
|--------|------------|---------|------|-----|-----------------------|-------------------------|
|        |            | 0.80039 |      |     |                       |                         |
| M00162 | V\$OCT1_06 | 1       | 7408 | (-) | CWNAWTKWSATRYN        | AATGTTTCAAAGAT          |
|        |            | 0.78000 |      |     | NNNNNNNNWATGCAAATNNNW |                         |
| M00138 | V\$OCT1_04 | 8       | 7413 | (-) | NNW                   | TTCAAAGATTAGAACTTTTAAAA |
|        |            | 0.81601 |      |     |                       |                         |
| M00162 | V\$OCT1_06 | 6       | 7425 | (+) | CWNAWTKWSATRYN        | AACTTTTAAAAAGCT         |
|        |            | 0.82148 |      |     |                       |                         |
| M00162 | V\$OCT1_06 | 4       | 7436 | (+) | CWNAWTKWSATRYN        | GCTCATGTAATTTT          |
|        |            | 0.82773 |      |     |                       |                         |
| M00162 | V\$OCT1_06 | 4       | 7437 | (-) | CWNAWTKWSATRYN        | CTCATGTAATTTTA          |
|        |            | 0.80585 |      |     |                       |                         |
| M00162 | V\$OCT1_06 | 9       | 7442 | (+) | CWNAWTKWSATRYN        | GTAATTTTAGTTCC          |
|        |            | 0.83476 |      |     |                       |                         |
| M00162 | V\$OCT1_06 | 6       | 7455 | (+) | CWNAWTKWSATRYN        | CATTCTGAAATTGA          |
|        |            | 0.87829 |      |     | NNNNNNNNWATGCAAATNNNW |                         |
| M00138 | V\$OCT1_04 | 4       | 7469 | (-) | NNW                   | TTGTCTATTTTCATATTCCAA   |
|        |            | 0.82659 |      |     |                       |                         |
| M00135 | V\$OCT1_01 | 3       | 7471 | (-) | NNNNWTATGCAAATNTNNN   | GTTCTATTTTCATATTCC      |
|        |            | 0.81718 |      |     |                       |                         |
| M00162 | V\$OCT1_06 | 7       | 7473 | (+) | CWNAWTKWSATRYN        | TCTATTTTCATATT          |
|        |            | 0.82805 |      |     |                       |                         |
| M00195 | V\$OCT1_Q6 | 7       | 7473 | (-) | NNNNATGCAAATNAN       | TCTATTTTCATATT          |
|        |            | 0.78911 |      |     |                       |                         |
| M00136 | V\$OCT1_02 | 7       | 7475 | (-) | NNGAATATKCANNNN       | TATTTTCATATTTC          |
|        |            | 0.78858 |      |     | NNNNNNNNWATGCAAATNNNW |                         |
| M00138 | V\$OCT1_04 | 2       | 7477 | (-) | NNW                   | TTTTCATATTTCGAATTATTTA  |
|        |            | 0.80429 |      |     |                       |                         |
| M00162 | V\$OCT1_06 | 7       | 7481 | (+) | CWNAWTKWSATRYN        | CATATTTCGAATTT          |
|        |            | 0.80820 |      |     |                       |                         |
| M00162 | V\$OCT1_06 | 3       | 7481 | (-) | CWNAWTKWSATRYN        | CATATTTCGAATTT          |
|        |            | 0.83945 |      |     |                       |                         |
| M00162 | V\$OCT1_06 | 3       | 7483 | (-) | CWNAWTKWSATRYN        | TATTTCGAATTTAT          |
|        |            | 0.85361 |      |     | NNNNNNNNWATGCAAATNNNW |                         |
| M00138 | V\$OCT1_04 | 8       | 7488 | (-) | NNW                   | CCAATTTATTTACATCAAAATTG |
|        |            | 0.73502 |      |     |                       |                         |
| M00135 | V\$OCT1_01 | 5       | 7490 | (-) | NNNNWTATGCAAATNTNNN   | AATTTATTTACATCAAAAT     |
|        |            | 0.87343 |      |     |                       |                         |
| M00162 | V\$OCT1_06 | 7       | 7498 | (-) | CWNAWTKWSATRYN        | TACATCAAAATTGC          |
|        |            |         |      |     |                       |                         |
| M00136 | V\$OCT1_02 | 0.79778 | 7522 | (-) | NNGAATATKCANNNN       | TGTGAGAATATAAAC         |
|        |            | 0.85312 |      |     |                       |                         |
| M00162 | V\$OCT1_06 | 5       | 7563 | (+) | CWNAWTKWSATRYN        | CTCAATAGGATTCT          |
|        |            | 0.77693 |      |     |                       |                         |
| M00136 | V\$OCT1_02 | 6       | 7569 | (+) | NNGAATATKCANNNN       | AGGATTCTTCATTCC         |
|        |            | 0.80859 |      |     |                       |                         |
| M00162 | V\$OCT1_06 | 4       | 7576 | (-) | CWNAWTKWSATRYN        | TTCATTCCAGGTTT          |
|        |            | 0.87475 |      |     |                       |                         |
| M00137 | V\$OCT1_03 | 3       | 7589 | (-) | NNNRTAATNANNN         | TCATTTTATCAC            |
|        |            | 0.81618 |      |     | NNNNNNNNWATGCAAATNNNW |                         |
| M00138 | V\$OCT1_04 | 6       | 7592 | (+) | NNW                   | TTTTTATCACGAAAATTCATATG |
|        |            | 0.80887 |      |     |                       |                         |
| M00136 | V\$OCT1_02 | 9       | 7597 | (-) | NNGAATATKCANNNN       | ATCACGAAAATTCAT         |
|        |            | 0.82873 |      |     | NNNNNNNNWATGCAAATNNNW |                         |
| M00138 | V\$OCT1_04 | 3       | 7598 | (+) | NNW                   | TCACGAAAATTCATATGCATTG  |
|        |            | 0.87114 |      |     |                       |                         |
| M00136 | V\$OCT1_02 | 2       | 7600 | (+) | NNGAATATKCANNNN       | ACGAAAATTCATATG         |
|        |            | 0.86054 |      |     |                       |                         |
| M00162 | V\$OCT1_06 | 7       | 7601 | (+) | CWNAWTKWSATRYN        | CGAAAATTCATATG          |
|        |            | 0.82024 |      |     |                       |                         |
| M00136 | V\$OCT1_02 | 9       | 7603 | (-) | NNGAATATKCANNNN       | AAAATTCATATGCAT         |
|        |            | 0.87703 |      |     | NNNNNNNNWATGCAAATNNNW |                         |
| M00138 | V\$OCT1_04 | 9       | 7603 | (-) | NNW                   | AAAATTCATATGCATTTCATTG  |
|        |            | 0.81210 |      |     |                       |                         |
| M00162 | V\$OCT1_06 | 9       | 7603 | (+) | CWNAWTKWSATRYN        | AAAATTCATATGCA          |
|        |            | 0.78795 |      |     | NNNNNNNNWATGCAAATNNNW |                         |
| M00138 | V\$OCT1_04 | 5       | 7604 | (+) | NNW                   | AAATTCATATGCATTTCATTCT  |

|        |            |                         |      |     |                                         |                          |
|--------|------------|-------------------------|------|-----|-----------------------------------------|--------------------------|
| M00135 | V\$OCT1_01 | 0.74551<br>7<br>0.88738 | 7605 | (-) | NNNNWTATGCAAATNTNNN                     | AATTCATATGCATTTCAT       |
| M00136 | V\$OCT1_02 | 5<br>0.85029            | 7606 | (+) | NNGAATATKCANNNN                         | ATTCATATGCATTTCG         |
| M00136 | V\$OCT1_02 | 8<br>0.84044            | 7609 | (-) | NNGAATATKCANNNN<br>NNNNNNNWATGCAAATNNNW | CATATGCATTTCAT           |
| M00138 | V\$OCT1_04 | 3<br>0.82926            | 7609 | (-) | NNW                                     | CATATGCATTTCATTCTACTCA   |
| M00135 | V\$OCT1_01 | 4<br>0.81510            | 7611 | (-) | NNNNWTATGCAAATNTNNN                     | TATGCATTTCATTCTACT       |
| M00136 | V\$OCT1_02 | 6<br>0.88859            | 7612 | (+) | NNGAATATKCANNNN                         | ATGCATTTCATTCT           |
| M00161 | V\$OCT1_05 | 4<br>0.83476            | 7613 | (+) | MKNATTTGCATAYY                          | TGCATTTCATTCT            |
| M00162 | V\$OCT1_06 | 6<br>0.84525            | 7613 | (+) | CWNAWTKWSATRYN                          | TGCATTTCATTCT            |
| M00195 | V\$OCT1_Q6 | 1<br>0.77206            | 7613 | (-) | NNNNATGCAAATNAN                         | TGCATTTCATTCTA           |
| M00136 | V\$OCT1_02 | 3<br>0.80474            | 7615 | (-) | NNGAATATKCANNNN                         | CATTTCATTCTACT           |
| M00248 | V\$OCT1_07 | 9<br>0.79652            | 7615 | (-) | TNTATGNTAATT<br>NNNNNNNWATGCAAATNNNW    | CATTTCATTCT              |
| M00138 | V\$OCT1_04 | 9<br>0.80937            | 7632 | (-) | NNW                                     | AGAAAGTATCTGTATTTGTTTAA  |
| M00162 | V\$OCT1_06 | 5<br>0.78314            | 7636 | (-) | CWNAWTKWSATRYN<br>NNNNNNNWATGCAAATNNNW  | AGTATCTGTATTTG           |
| M00138 | V\$OCT1_04 | 5<br>0.82656            | 7641 | (+) | NNW                                     | CTGTATTTGTTTAAATAAAAAAGG |
| M00162 | V\$OCT1_06 | 2<br>0.78879            | 7641 | (+) | CWNAWTKWSATRYN<br>NNNNNNNWATGCAAATNNNW  | CTGTATTTGTTTAAATAAAAAAGG |
| M00138 | V\$OCT1_04 | 1                       | 7642 | (-) | NNW                                     | TGTATTTGTTTAAATAAAAAAGGT |
| M00137 | V\$OCT1_03 | 0.84196<br>0.87949      | 7649 | (+) | NNNRTAATNANNN                           | GTTTAAATAAAAA            |
| M00137 | V\$OCT1_03 | 4                       | 7652 | (+) | NNNRTAATNANNN                           | TTAATAAAAAAGGT           |
| M00137 | V\$OCT1_03 | 0.88384<br>0.80593      | 7680 | (-) | NNNRTAATNANNN<br>NNNNNNNWATGCAAATNNNW   | AAGTTATTATACT            |
| M00138 | V\$OCT1_04 | 9<br>0.82656            | 7701 | (-) | NNW                                     | CAACATATTTAAATAAAATTGA   |
| M00162 | V\$OCT1_06 | 2<br>0.80771            | 7705 | (+) | CWNAWTKWSATRYN                          | ATATTTTAAATAAA           |
| M00248 | V\$OCT1_07 | 7<br>0.84765            | 7707 | (-) | TNTATGNTAATT                            | ATTTTAAATAAA             |
| M00162 | V\$OCT1_06 | 6<br>0.78168            | 7711 | (-) | CWNAWTKWSATRYN<br>NNNNNNNWATGCAAATNNNW  | TAAATAAAATTGAC           |
| M00138 | V\$OCT1_04 | 1<br>0.84218            | 7712 | (+) | NNW                                     | AAATAAAATTGACAATCCAAAAA  |
| M00162 | V\$OCT1_06 | 7<br>0.81555            | 7716 | (+) | CWNAWTKWSATRYN<br>NNNNNNNWATGCAAATNNNW  | AAAATTGACAATCC           |
| M00138 | V\$OCT1_04 | 8<br>0.74780            | 7718 | (+) | NNW                                     | AATTGACAATCCAAAAAAAAGTA  |
| M00135 | V\$OCT1_01 | 6<br>0.84218            | 7730 | (+) | NNNNWTATGCAAATNTNNN                     | AAAAAAAAGTAAATTTTAT      |
| M00162 | V\$OCT1_06 | 7<br>0.85507            | 7733 | (+) | CWNAWTKWSATRYN                          | AAAAAGTAAATTTT           |
| M00162 | V\$OCT1_06 | 8<br>0.79308            | 7733 | (-) | CWNAWTKWSATRYN                          | AAAAAGTAAATTTT           |
| M00248 | V\$OCT1_07 | 9<br>0.83437            | 7733 | (+) | TNTATGNTAATT                            | AAAAAGTAAATT             |
| M00162 | V\$OCT1_06 | 5<br>0.87159            | 7757 | (+) | CWNAWTKWSATRYN                          | AATCTTTTATACC            |
| M00137 | V\$OCT1_03 | 2<br>0.83437            | 7758 | (-) | NNNRTAATNANNN                           | ATCTTTTATACC             |
| M00162 | V\$OCT1_06 | 5                       | 7765 | (-) | CWNAWTKWSATRYN                          | TATACCCAATTGTT           |

|        |            |                 |      |              |                                         |                         |
|--------|------------|-----------------|------|--------------|-----------------------------------------|-------------------------|
| M00162 | V\$OCT1_06 | 0.84765<br>6    | 7796 | (-)          | CWNAWTKWSATRYN                          | AGCAATCCAGTATG          |
| M00135 | V\$OCT1_01 | 0.79053<br>8    | 7801 | (+)          | NNNNWTATGCAAATNTNNN                     | TCCAGTATGAAAGTGTGGA     |
| M00162 | V\$OCT1_06 | 0.95078<br>1    | 7804 | (-)          | CWNAWTKWSATRYN<br>NNNNNNNNWATGCAAATNNNW | AGTATGAAAGTGTG          |
| M00138 | V\$OCT1_04 | 0.79632<br>7820 | (+)  | NNW          | ATAGTTTCCTTCTAATTCTAAAA                 |                         |
| M00162 | V\$OCT1_06 | 0.80820<br>3    | 7832 | (-)          | CWNAWTKWSATRYN                          | TAATTCTAAAAGTC          |
| M00138 | V\$OCT1_04 | 0.79506<br>5    | 7868 | (-)          | NNNNNNNNWATGCAAATNNNW                   | TCTTTCTTTTAGCAAATGAAAGC |
| M00135 | V\$OCT1_01 | 0.74685<br>2    | 7870 | (-)          | NNNNWTATGCAAATNTNNN                     | TTTCTTTTAGCAAATGAAA     |
| M00135 | V\$OCT1_01 | 0.76249<br>5    | 7909 | (+)          | NNNNWTATGCAAATNTNNN                     | TGAGGTATGCCATTTTTAT     |
| M00162 | V\$OCT1_06 | 0.81640<br>6    | 7911 | (+)          | CWNAWTKWSATRYN                          | AGGTATGCCATTTT          |
| M00162 | V\$OCT1_06 | 0.93242<br>2    | 7912 | (-)          | CWNAWTKWSATRYN<br>NNNNNNNNWATGCAAATNNNW | GGTATGCCATTTTT          |
| M00138 | V\$OCT1_04 | 0.84128<br>7918 | (+)  | NNW          | CCATTTTATGTTAATTAAGTAT                  |                         |
| M00135 | V\$OCT1_01 | 0.81610<br>1    | 7920 | (+)          | NNNNWTATGCAAATNTNNN                     | ATTTTATGTTAATTAAGT      |
| M00248 | V\$OCT1_07 | 0.98834<br>7923 | (+)  | TNTATGNTAATT | TTTATGTTAATT                            |                         |
| M00137 | V\$OCT1_03 | 0.85302<br>3    | 7926 | (+)          | NNNRTAATNANNN                           | ATGTTAATTAAGT           |
| M00162 | V\$OCT1_06 | 0.83437<br>5    | 7928 | (+)          | CWNAWTKWSATRYN                          | GTTAATTAAGTATC          |
| M00138 | V\$OCT1_04 | 0.80991<br>2    | 7931 | (+)          | NNNNNNNNWATGCAAATNNNW                   | AATTAAGTATCCCAATTAGAAAA |
| M00135 | V\$OCT1_01 | 0.76230<br>4    | 7933 | (+)          | NNNNWTATGCAAATNTNNN                     | TTAAGTATCCCAATTAGAA     |
| M00195 | V\$OCT1_Q6 | 0.83733<br>6    | 7935 | (+)          | NNNNATGCAAATNAN                         | AAGTATCCCAATTAG         |
| M00162 | V\$OCT1_06 | 0.94804<br>7    | 7936 | (-)          | CWNAWTKWSATRYN                          | AGTATCCCAATTAG          |
| M00248 | V\$OCT1_07 | 0.79160<br>5    | 7936 | (+)          | TNTATGNTAATT                            | AGTATCCCAATT            |
| M00137 | V\$OCT1_03 | 0.84037<br>9    | 7939 | (+)          | NNNRTAATNANNN                           | ATCCCAATTAGAA           |
| M00135 | V\$OCT1_01 | 0.73330<br>8    | 7940 | (-)          | NNNNWTATGCAAATNTNNN                     | TCCCAATTAGAAAATGTTT     |
| M00137 | V\$OCT1_03 | 0.84986<br>2    | 7940 | (-)          | NNNRTAATNANNN                           | TCCCAATTAGAAA           |
| M00248 | V\$OCT1_07 | 0.79372<br>5    | 7944 | (-)          | TNTATGNTAATT                            | AATTAGAAAATG            |
| M00138 | V\$OCT1_04 | 0.81074<br>9    | 7945 | (+)          | NNNNNNNNWATGCAAATNNNW                   | ATTAGAAAATGTTTATGAAAGTT |
| M00137 | V\$OCT1_03 | 0.89134<br>7    | 7951 | (-)          | NNNRTAATNANNN                           | AAATGTTTATGAA           |
| M00138 | V\$OCT1_04 | 0.86344<br>6    | 7951 | (+)          | NNNNNNNNWATGCAAATNNNW                   | AAATGTTTATGAAAGTTTGTTGA |
| M00135 | V\$OCT1_01 | 0.79874<br>1    | 7953 | (+)          | NNNNWTATGCAAATNTNNN                     | ATGTTTATGAAAGTTTGTT     |
| M00162 | V\$OCT1_06 | 0.80820<br>3    | 7955 | (+)          | CWNAWTKWSATRYN                          | GTTTATGAAAGTTT          |
| M00162 | V\$OCT1_06 | 0.88671<br>9    | 7956 | (-)          | CWNAWTKWSATRYN                          | TTTATGAAAGTTTG          |
| M00248 | V\$OCT1_07 | 0.79478<br>5    | 7956 | (+)          | TNTATGNTAATT                            | TTTATGAAAGTT            |
| M00135 | V\$OCT1_01 | 0.73483<br>4    | 7977 | (-)          | NNNNWTATGCAAATNTNNN                     | ATAAAGTTTACATGTCCCG     |
| M00162 | V\$OCT1_06 | 0.87070<br>3    | 7979 | (+)          | CWNAWTKWSATRYN                          | AAAGTTTACATGTC          |

|        |            |                 |      |                     |                                         |                         |
|--------|------------|-----------------|------|---------------------|-----------------------------------------|-------------------------|
| M00162 | V\$OCT1_06 | 0.86796<br>9    | 8021 | (-)                 | CWNAWTKWSATRYN                          | TGTATCTAATCTAT          |
| M00138 | V\$OCT1_04 | 0.82413<br>2    | 8025 | (+)                 | NNNNNNNNWATGCAAATNNNW<br>NNW            | TCTAATCTATCCTAATTTTAACA |
| M00135 | V\$OCT1_01 | 0.78309<br>8    | 8027 | (+)                 | NNNNWTATGCAAATNTNNN                     | TAATCTATCCTAATTTTAA     |
| M00248 | V\$OCT1_07 | 0.90311<br>6    | 8030 | (+)                 | TNTATGNTAATT                            | TCTATCCTAATT            |
| M00135 | V\$OCT1_01 | 0.77699<br>4    | 8036 | (-)                 | NNNNWTATGCAAATNTNNN                     | CTAATTTTAACATACAAGG     |
| M00162 | V\$OCT1_06 | 0.85781<br>2    | 8036 | (+)                 | CWNAWTKWSATRYN                          | CTAATTTTAACATA          |
| M00162 | V\$OCT1_06 | 0.85507<br>8    | 8038 | (+)                 | CWNAWTKWSATRYN                          | AATTTTAACATACA          |
| M00248 | V\$OCT1_07 | 0.79732<br>9    | 8040 | (-)                 | TNTATGNTAATT                            | TTTAAACATACA            |
| M00162 | V\$OCT1_06 | 0.84218<br>7    | 8067 | (-)                 | CWNAWTKWSATRYN                          | AAAATGTAAGAAAA          |
| M00137 | V\$OCT1_03 | 0.84235<br>5    | 8078 | (-)                 | NNNRTAATNANNN                           | AAACAATTATTG            |
| M00138 | V\$OCT1_04 | 0.78105<br>4    | 8080 | (-)                 | NNNNNNNNWATGCAAATNNNW<br>NNW            | ACAATTATTTGTCAGAGACAAAA |
| M00162 | V\$OCT1_06 | 0.80820<br>3    | 8085 | (-)                 | CWNAWTKWSATRYN                          | TATTTGTCAGAGAC          |
| M00137 | V\$OCT1_03 | 0.84314<br>5    | 8099 | (+)                 | NNNRTAATNANNN                           | AAAATAAGATTT            |
| M00135 | V\$OCT1_01 | 0.73636<br>8127 | (-)  | NNNNWTATGCAAATNTNNN | ATCCTATCTGGATATCTGT                     |                         |
| M00135 | V\$OCT1_01 | 0.73941<br>2    | 8143 | (+)                 | NNNNWTATGCAAATNTNNN                     | TGTGGTATCCAAACATGAT     |
| M00162 | V\$OCT1_06 | 0.86054<br>7    | 8146 | (-)                 | CWNAWTKWSATRYN                          | GGTATCCAAACATG          |
| M00138 | V\$OCT1_04 | 0.81263<br>1    | 8155 | (+)                 | NNNNNNNNWATGCAAATNNNW<br>NNW            | ACATGATTTTCTAATTTTTTTT  |
| M00135 | V\$OCT1_01 | 0.76478<br>4    | 8157 | (+)                 | NNNNWTATGCAAATNTNNN                     | ATGATTTTCTAATTTTTT      |
| M00162 | V\$OCT1_06 | 0.80585<br>9    | 8160 | (+)                 | CWNAWTKWSATRYN                          | ATTTTCTAATTTT           |
| M00248 | V\$OCT1_07 | 0.81916<br>5    | 8160 | (+)                 | TNTATGNTAATT<br>NNNNNNNNWATGCAAATNNNW   | ATTTTCTAATT             |
| M00138 | V\$OCT1_04 | 0.78189<br>8183 | (-)  | NNW                 | CCCAGATTTTGTAGAATTAAAT                  |                         |
| M00135 | V\$OCT1_01 | 0.74685<br>2    | 8185 | (-)                 | NNNNWTATGCAAATNTNNN                     | CAGATTTTGTAGAATTAA      |
| M00162 | V\$OCT1_06 | 0.80703<br>1    | 8195 | (+)                 | CWNAWTKWSATRYN                          | TAGAATTAAATCTT          |
| M00162 | V\$OCT1_06 | 0.86835<br>9    | 8196 | (-)                 | CWNAWTKWSATRYN<br>NNNNNNNNWATGCAAATNNNW | AGAATTAAATCTTG          |
| M00138 | V\$OCT1_04 | 0.81765<br>8205 | (+)  | NNW                 | TCTTGTCAGTAAAAATTACAATA                 |                         |
| M00162 | V\$OCT1_06 | 0.80078<br>1    | 8209 | (+)                 | CWNAWTKWSATRYN                          | GTCAGTAAAAATTA          |
| M00195 | V\$OCT1_Q6 | 0.82123<br>4    | 8209 | (+)                 | NNNNATGCAAATNAN                         | GTCAGTAAAAATTAC         |
| M00138 | V\$OCT1_04 | 0.78251<br>8    | 8212 | (-)                 | NNNNNNNNWATGCAAATNNNW<br>NNW            | ACTGAAAATTACAATAATGGCTA |
| M00135 | V\$OCT1_01 | 0.76840<br>9    | 8214 | (-)                 | NNNNWTATGCAAATNTNNN                     | TGAAAATTACAATAATGGC     |
| M00162 | V\$OCT1_06 | 0.90898<br>4    | 8216 | (-)                 | CWNAWTKWSATRYN                          | AAAATTACAATAAT          |
| M00248 | V\$OCT1_07 | 0.91308<br>8218 | (-)  | TNTATGNTAATT        | AATTACAATAAT                            |                         |
| M00138 | V\$OCT1_04 | 0.80154<br>7    | 8220 | (+)                 | NNNNNNNNWATGCAAATNNNW<br>NNW            | TTACAATAATGGCTATGCTTCTA |
| M00138 | V\$OCT1_04 | 0.80740<br>3    | 8226 | (+)                 | NNNNNNNNWATGCAAATNNNW<br>NNW            | TAATGGCTATGCTTCTAAATTGT |

|        |            |                    |      |     |                                         |                         |
|--------|------------|--------------------|------|-----|-----------------------------------------|-------------------------|
| M00136 | V\$OCT1_02 | 0.79886<br>3       | 8228 | (+) | NNGAATATKCANNNN                         | ATGGCTATGCTTCTA         |
| M00162 | V\$OCT1_06 | 0.84218<br>7       | 8243 | (+) | CWNAWTKWSATRYN                          | AATTGTGAAATATA          |
| M00137 | V\$OCT1_03 | 0.84670<br>1       | 8251 | (+) | NNNRTAATNANNN                           | AATATAAACATGA           |
| M00162 | V\$OCT1_06 | 0.85<br>0.84218    | 8256 | (+) | CWNAWTKWSATRYN                          | AAACATGATATATC          |
| M00162 | V\$OCT1_06 | 7<br>0.79732       | 8257 | (-) | CWNAWTKWSATRYN                          | AACATGATATATCC          |
| M00248 | V\$OCT1_07 | 9<br>0.80117       | 8290 | (+) | TNTATGNTAATT                            | TCTATGTAAAG             |
| M00162 | V\$OCT1_06 | 2<br>0.81328       | 8303 | (+) | CWNAWTKWSATRYN                          | GGCACTGGAATCCT          |
| M00162 | V\$OCT1_06 | 1<br>0.78649       | 8311 | (+) | CWNAWTKWSATRYN<br>NNNNNNNWWATGCAAATNNNW | AATCCTTTGCTATT          |
| M00138 | V\$OCT1_04 | 1<br>0.81210       | 8341 | (+) | NNW                                     | AAAAGAGAAGGCATACAAAGTGA |
| M00162 | V\$OCT1_06 | 9<br>0.84156       | 8386 | (+) | CWNAWTKWSATRYN                          | CAGAACTTCATCCA          |
| M00137 | V\$OCT1_03 | 5<br>0.78879       | 8396 | (-) | NNNRTAATNANNN<br>NNNNNNNWWATGCAAATNNNW  | TCCAGTTTACAAA           |
| M00138 | V\$OCT1_04 | 1<br>0.77314       | 8455 | (-) | NNW                                     | TCCAACATTCTGAATAACTTCCC |
| M00136 | V\$OCT1_02 | 6<br>0.78207       | 8461 | (-) | NNGAATATKCANNNN                         | ATTCTGAATAACTTC         |
| M00136 | V\$OCT1_02 | 9<br>0.80039       | 8503 | (+) | NNGAATATKCANNNN                         | GAGAACATGTACTTT         |
| M00162 | V\$OCT1_06 | 1                  | 8511 | (+) | CWNAWTKWSATRYN<br>NNNNNNNWWATGCAAATNNNW | GTACTTIGATTGTT          |
| M00138 | V\$OCT1_04 | 0.7821<br>0.79422  | 8523 | (+) | NNW<br>NNNNNNNWWATGCAAATNNNW            | TTCATCTTATCTAAATTTACCCA |
| M00138 | V\$OCT1_04 | 8<br>0.76917       | 8524 | (-) | NNW                                     | TCATCTTATCTAAATTTACCCAG |
| M00135 | V\$OCT1_01 | 2<br>0.85273       | 8525 | (+) | NNNNWTATGCAAATNTNNN                     | CATCTTATCTAAATTTACC     |
| M00162 | V\$OCT1_06 | 4<br>0.80429       | 8528 | (+) | CWNAWTKWSATRYN                          | CTTATCTAAATTTA          |
| M00162 | V\$OCT1_06 | 7<br>0.82276       | 8528 | (-) | CWNAWTKWSATRYN                          | CTTATCTAAATTTA          |
| M00248 | V\$OCT1_07 | 9<br>0.78084       | 8528 | (+) | TNTATGNTAATT<br>NNNNNNNWWATGCAAATNNNW   | CTTATCTAAATT            |
| M00138 | V\$OCT1_04 | 5<br>0.84946       | 8530 | (-) | NNW                                     | TATCTAAATTTACCCAGGAATTT |
| M00137 | V\$OCT1_03 | 7                  | 8562 | (-) | NNNRTAATNANNN<br>NNNNNNNWWATGCAAATNNNW  | ATCAGTTTACCAC           |
| M00138 | V\$OCT1_04 | 0.84609<br>0.84261 | 8593 | (-) | NNW                                     | CTGGTTAATTAGCATTTTTATCT |
| M00135 | V\$OCT1_01 | 7<br>0.89623       | 8595 | (-) | NNNNWTATGCAAATNTNNN                     | GGTTAATTAGCATTTTTAT     |
| M00161 | V\$OCT1_05 | 1<br>0.87745       | 8597 | (+) | MKNATTTGCATAYY                          | TTAATTAGCATTTT          |
| M00195 | V\$OCT1_Q6 | 6<br>0.79696       | 8597 | (-) | NNNNATGCAAATNAN                         | TTAATTAGCATTTTTT        |
| M00136 | V\$OCT1_02 | 8<br>0.92177       | 8599 | (-) | NNGAATATKCANNNN                         | AATTAGCATTTTTAT         |
| M00248 | V\$OCT1_07 | 2<br>0.80614       | 8599 | (-) | TNTATGNTAATT<br>NNNNNNNWWATGCAAATNNNW   | AATTAGCATTTT            |
| M00138 | V\$OCT1_04 | 8<br>0.82148       | 8606 | (-) | NNW                                     | ATTTTTATCTTGAATGTAAATTA |
| M00162 | V\$OCT1_06 | 4<br>0.81451       | 8610 | (+) | CWNAWTKWSATRYN<br>NNNNNNNWWATGCAAATNNNW | TTATCTTGAATGTA          |
| M00138 | V\$OCT1_04 | 3<br>0.77964       | 8611 | (+) | NNW                                     | TATCTTGAATGTAAATTAATGTC |
| M00136 | V\$OCT1_02 | 3                  | 8612 | (-) | NNGAATATKCANNNN                         | ATCTTGAATGTAAAT         |

|        |            |                    |      |     |                                          |                          |
|--------|------------|--------------------|------|-----|------------------------------------------|--------------------------|
| M00135 | V\$OCT1_01 | 0.75066<br>8       | 8613 | (+) | NNNNWTATGCAAATNTNNN                      | TCTGAATGTAAATTAATG       |
| M00195 | V\$OCT1_Q6 | 0.84798            | 8615 | (+) | NNNNATGCAAATNAN                          | TTGAATGTAAATTAA          |
| M00162 | V\$OCT1_06 | 0.88125            | 8616 | (-) | CWNAWTKWSATRYN                           | TGAATGTAAATTAA           |
| M00248 | V\$OCT1_07 | 0.9152<br>0.78753  | 8616 | (+) | TNTATGNTAATT<br>NNNNNNNNWATGCAAATNNNW    | TGAATGTAAATT             |
| M00138 | V\$OCT1_04 | 7<br>0.87343       | 8617 | (+) | NNW                                      | GAATGTAAATTAATGTCATAAAA  |
| M00162 | V\$OCT1_06 | 7<br>0.85507       | 8625 | (+) | CWNAWTKWSATRYN                           | ATTAATGTCATAAA           |
| M00162 | V\$OCT1_06 | 8<br>0.74208       | 8642 | (-) | CWNAWTKWSATRYN                           | AACAATACATTTTT           |
| M00135 | V\$OCT1_01 | 3<br>0.86919       | 8657 | (+) | NNNNWTATGCAAATNTNNN                      | TTTTTTAAGGAAATTGTTC      |
| M00248 | V\$OCT1_07 | 7<br>0.84217       | 8660 | (+) | TNTATGNTAATT                             | TTTAAGGAAATT             |
| M00136 | V\$OCT1_02 | 7<br>0.80039       | 8693 | (+) | NNGAATATKCANNNN                          | AGATATATTCACTAA          |
| M00162 | V\$OCT1_06 | 1<br>0.80820       | 8696 | (-) | CWNAWTKWSATRYN                           | TATATTCACTAAAT           |
| M00162 | V\$OCT1_06 | 3<br>0.78105       | 8699 | (+) | CWNAWTKWSATRYN<br>NNNNNNNNWATGCAAATNNNW  | ATTCACTAAATTTA           |
| M00138 | V\$OCT1_04 | 4                  | 8701 | (+) | NNW<br>NNNNNNNNWATGCAAATNNNW             | TCACTAAATTTAAAAATATATTAA |
| M00138 | V\$OCT1_04 | 0.81033<br>0.78314 | 8701 | (-) | NNW<br>NNNNNNNNWATGCAAATNNNW             | TCACTAAATTTAAAAATATATTAA |
| M00138 | V\$OCT1_04 | 5<br>0.73044       | 8702 | (-) | NNW                                      | CACTAAATTTAAAAATATATTAAC |
| M00135 | V\$OCT1_01 | 6<br>0.86562       | 8704 | (-) | NNNNWTATGCAAATNTNNN                      | CTAAATTTAAAAATATATTA     |
| M00162 | V\$OCT1_06 | 5<br>0.89062       | 8704 | (+) | CWNAWTKWSATRYN                           | CTAAATTTAAAAATA          |
| M00162 | V\$OCT1_06 | 5<br>0.83437       | 8705 | (-) | CWNAWTKWSATRYN                           | TAAATTTAAAAATAT          |
| M00162 | V\$OCT1_06 | 5<br>0.83167       | 8706 | (+) | CWNAWTKWSATRYN                           | AAATTTAAAAATATA          |
| M00248 | V\$OCT1_07 | 3<br>0.80259       | 8708 | (-) | TNTATGNTAATT<br>NNNNNNNNWATGCAAATNNNW    | ATTTAAAAATATA            |
| M00138 | V\$OCT1_04 | 3<br>0.77909       | 8712 | (-) | NNW                                      | AAAATATATTAACATCATCCAGG  |
| M00135 | V\$OCT1_01 | 2                  | 8714 | (-) | NNNNWTATGCAAATNTNNN                      | AATATATTAACATCATCCA      |
| M00162 | V\$OCT1_06 | 0.81875<br>0.83437 | 8716 | (-) | CWNAWTKWSATRYN                           | TATATTAACATCAT           |
| M00162 | V\$OCT1_06 | 5<br>0.87773       | 8734 | (-) | CWNAWTKWSATRYN                           | GATATCTTAAATTT           |
| M00162 | V\$OCT1_06 | 4<br>0.81639       | 8735 | (+) | CWNAWTKWSATRYN<br>NNNNNNNNWATGCAAATNNNW  | ATATCTTAAATTTT           |
| M00138 | V\$OCT1_04 | 5<br>0.77260       | 8736 | (+) | NNW                                      | TATCTTAAATTTTAAATTAACCTT |
| M00136 | V\$OCT1_02 | 4<br>0.84148       | 8737 | (-) | NNGAATATKCANNNN<br>NNNNNNNNWATGCAAATNNNW | ATCTTAAATTTTAAAT         |
| M00138 | V\$OCT1_04 | 9<br>0.80196       | 8737 | (-) | NNW<br>NNNNNNNNWATGCAAATNNNW             | ATCTTAAATTTTAAATTAACCTT  |
| M00138 | V\$OCT1_04 | 6<br>0.87555       | 8738 | (-) | NNW                                      | TCTTAAATTTTAAATTAACCTTT  |
| M00248 | V\$OCT1_07 | 6                  | 8741 | (+) | TNTATGNTAATT<br>NNNNNNNNWATGCAAATNNNW    | TAAATTTTAATT             |
| M00138 | V\$OCT1_04 | 0.789<br>0.82015   | 8742 | (+) | NNW<br>NNNNNNNNWATGCAAATNNNW             | AAATTTTAATTAACCTTTTTATT  |
| M00138 | V\$OCT1_04 | 9<br>0.79736       | 8743 | (-) | NNW<br>NNNNNNNNWATGCAAATNNNW             | AATTTTAATTAACCTTTTTATT   |
| M00138 | V\$OCT1_04 | 5                  | 8748 | (+) | NNW                                      | TAATTAACCTTTTTATTTTTTGA  |



|        |            |              |      |     |                              |                         |
|--------|------------|--------------|------|-----|------------------------------|-------------------------|
| M00162 | V\$OCT1_06 | 0.83437<br>5 | 8753 | (+) | CWNAWTKWSATRYN               | AAACTTTTTATTTT          |
| M00138 | V\$OCT1_04 | 0.85926<br>4 | 8758 | (-) | NNNNNNNNWATGCAAATNNNW<br>NNW | TTTTATTTTTTGAATTTTTTAGC |
| M00162 | V\$OCT1_06 | 0.86992<br>2 | 8762 | (+) | CWNAWTKWSATRYN               | ATTTTTTGAATTTT          |
| M00195 | V\$OCT1_Q6 | 0.80322<br>1 | 8762 | (-) | NNNNATGCAAATNAN              | ATTTTTTGAATTTTT         |
| M00136 | V\$OCT1_02 | 0.81429<br>3 | 8764 | (-) | NNGAATATKCANNNN              | TTTTTGAATTTTTTA         |
| M00138 | V\$OCT1_04 | 0.83542<br>5 | 8768 | (-) | NNNNNNNNWATGCAAATNNNW<br>NNW | TGAATTTTTTAGCAGAAGTACAT |
| M00162 | V\$OCT1_06 | 0.87617<br>2 | 8780 | (+) | CWNAWTKWSATRYN               | CAGAAGTACATTCA          |
| M00136 | V\$OCT1_02 | 0.79426<br>1 | 8783 | (+) | NNGAATATKCANNNN              | AAGTACATTCAAAAG         |
| M00138 | V\$OCT1_04 | 0.79130<br>1 | 8832 | (-) | NNNNNNNNWATGCAAATNNNW<br>NNW | TGGTAAAATTTTATTAAGTTA   |
| M00138 | V\$OCT1_04 | 0.84295<br>3 | 8836 | (+) | NNNNNNNNWATGCAAATNNNW<br>NNW | AAAATTTTATTAAGTTAATCA   |
| M00137 | V\$OCT1_03 | 0.85223<br>2 | 8839 | (-) | NNNRTAATNANNN                | ATTTTATTAAG             |
| M00138 | V\$OCT1_04 | 0.79025<br>5 | 8907 | (-) | NNNNNNNNWATGCAAATNNNW<br>NNW | TCTCTCTTTTCAATATCTGCTA  |
| M00135 | V\$OCT1_01 | 0.73216<br>3 | 8918 | (+) | NNNNWTATGCAAATNTNNN          | CAATATCTGCTAAACGTGA     |
| M00162 | V\$OCT1_06 | 0.86289<br>1 | 8987 | (+) | CWNAWTKWSATRYN               | AAAAGTACAAGTT           |
| M00162 | V\$OCT1_06 | 0.82109<br>4 | 8988 | (-) | CWNAWTKWSATRYN               | AAACTGACAAGTTT          |
| M00162 | V\$OCT1_06 | 0.80078<br>1 | 8997 | (+) | CWNAWTKWSATRYN               | AGTTTTTAATCTC           |
| M00162 | V\$OCT1_06 | 0.81367<br>2 | 9003 | (-) | CWNAWTKWSATRYN               | TTAATCTCAGATAT          |
| M00162 | V\$OCT1_06 | 0.87773<br>4 | 9011 | (+) | CWNAWTKWSATRYN               | AGATATTTAATTCA          |
| M00195 | V\$OCT1_Q6 | 0.79066<br>6 | 9011 | (+) | NNNNATGCAAATNAN              | AGATATTTAATTCAT         |
| M00162 | V\$OCT1_06 | 0.91171<br>9 | 9012 | (-) | CWNAWTKWSATRYN               | GATATTTAATTCAT          |
| M00162 | V\$OCT1_06 | 0.83398<br>4 | 9015 | (+) | CWNAWTKWSATRYN               | ATTTAATTCATACT          |
| M00136 | V\$OCT1_02 | 0.77341<br>6 | 9017 | (-) | NNGAATATKCANNNN              | TTAATTCATACTCTC         |
| M00162 | V\$OCT1_06 | 0.86093<br>7 | 9023 | (+) | CWNAWTKWSATRYN               | CATACTCTCATTTG          |
| M00138 | V\$OCT1_04 | 0.85863<br>7 | 9025 | (-) | NNNNNNNNWATGCAAATNNNW<br>NNW | TACTCTCATTTGAATACTTGTT  |
| M00135 | V\$OCT1_01 | 0.81991<br>6 | 9027 | (-) | NNNNWTATGCAAATNTNNN          | CTCTCATTTGAATACTTGT     |
| M00161 | V\$OCT1_05 | 0.90536<br>3 | 9029 | (+) | MKNATTGTCATAYY               | CTCATTTGAATACT          |
| M00162 | V\$OCT1_06 | 0.92226<br>6 | 9029 | (+) | CWNAWTKWSATRYN               | CTCATTTGAATACT          |
| M00195 | V\$OCT1_Q6 | 0.88264<br>2 | 9029 | (-) | NNNNATGCAAATNAN              | CTCATTTGAATACTT         |
| M00136 | V\$OCT1_02 | 0.81591<br>8 | 9031 | (-) | NNGAATATKCANNNN              | CATTTGAATACTTGT         |
| M00248 | V\$OCT1_07 | 0.80008<br>5 | 9031 | (-) | TNTATGNTAATT                 | CATTTGAATACT            |
| M00138 | V\$OCT1_04 | 0.78774<br>6 | 9064 | (-) | NNNNNNNNWATGCAAATNNNW<br>NNW | AGATCTGATTAGCACAGTATTGA |
| M00137 | V\$OCT1_03 | 0.91939<br>9 | 9066 | (-) | NNNRTAATNANNN                | ATCTGATTAGCAC           |
| M00195 | V\$OCT1_Q6 | 0.82041<br>5 | 9068 | (-) | NNNNATGCAAATNAN              | CTGATTAGCACAGTA         |

|        |            |              |      |     |                              |                         |
|--------|------------|--------------|------|-----|------------------------------|-------------------------|
| M00135 | V\$OCT1_01 | 0.75143<br>1 | 9076 | (+) | NNNNWTATGCAAATNTNNN          | CACAGTATTGAAATGGCAC     |
| M00162 | V\$OCT1_06 | 0.83476<br>6 | 9079 | (+) | CWNAWTKWSATRYN               | AGTATTGAAATGGC          |
| M00248 | V\$OCT1_07 | 0.79605<br>7 | 9079 | (+) | TNTATGNTAATT                 | AGTATTGAAATG            |
| M00162 | V\$OCT1_06 | 0.80117<br>2 | 9109 | (+) | CWNAWTKWSATRYN               | CAGACTTGAGTTTG          |
| M00162 | V\$OCT1_06 | 0.91679<br>7 | 9144 | (+) | CWNAWTKWSATRYN               | CGGCATGTGATATT          |
| M00162 | V\$OCT1_06 | 0.80156<br>2 | 9145 | (-) | CWNAWTKWSATRYN               | GGCATGTGATATTA          |
| M00162 | V\$OCT1_06 | 0.80859<br>4 | 9152 | (-) | CWNAWTKWSATRYN               | GATATTAGATAGTT          |
| M00162 | V\$OCT1_06 | 0.81367<br>2 | 9173 | (+) | CWNAWTKWSATRYN               | CTGCTGTAAATTTA          |
| M00162 | V\$OCT1_06 | 0.80078<br>1 | 9186 | (+) | CWNAWTKWSATRYN               | ATAACTTAAGTTCC          |
| M00162 | V\$OCT1_06 | 0.80078<br>1 | 9192 | (-) | CWNAWTKWSATRYN               | TAAGTTCCAAAGTG          |
| M00138 | V\$OCT1_04 | 0.79485<br>6 | 9204 | (-) | NNNNNNNNWATGCAAATNNNW<br>NNW | TGACAAAATAGTAATAATATTTA |
| M00137 | V\$OCT1_03 | 0.91386<br>8 | 9211 | (+) | NNNRTAATNANNN                | ATAGTAATAATAT           |
| M00137 | V\$OCT1_03 | 0.84393<br>5 | 9214 | (+) | NNNRTAATNANNN                | GTAATAATATTTA           |
| M00136 | V\$OCT1_02 | 0.85056<br>8 | 9216 | (+) | NNGAATATKCANNNN              | AATAATATTTAAGCA         |
| M00138 | V\$OCT1_04 | 0.82434<br>1 | 9218 | (+) | NNNNNNNNWATGCAAATNNNW<br>NNW | TAATATTTAAGCATATAAAGCAA |
| M00135 | V\$OCT1_01 | 0.76192<br>3 | 9219 | (-) | NNNNWTATGCAAATNTNNN          | AATATTTAAGCATATAAAG     |
| M00138 | V\$OCT1_04 | 0.78377<br>2 | 9222 | (+) | NNNNNNNNWATGCAAATNNNW<br>NNW | ATTTAAGCATATAAAGCAATTAA |
| M00136 | V\$OCT1_02 | 0.79859<br>2 | 9223 | (-) | NNGAATATKCANNNN              | TTTAAGCATATAAAG         |
| M00195 | V\$OCT1_Q6 | 0.81331<br>9 | 9226 | (+) | NNNNATGCAAATNAN              | AAGCATATAAAGCAA         |
| M00162 | V\$OCT1_06 | 0.86289<br>1 | 9249 | (-) | CWNAWTKWSATRYN               | AGCAAGACATAGTG          |
| M00195 | V\$OCT1_Q6 | 0.80513<br>1 | 9256 | (+) | NNNNATGCAAATNAN              | CATAGTGCAAAGTAA         |
| M00162 | V\$OCT1_06 | 0.81875<br>2 | 9290 | (-) | CWNAWTKWSATRYN               | AGTATCAGAAACAT          |
| M00162 | V\$OCT1_06 | 0.82929<br>7 | 9314 | (-) | CWNAWTKWSATRYN               | CTCATCCAATATTC          |
| M00136 | V\$OCT1_02 | 0.77098<br>7 | 9315 | (-) | NNGAATATKCANNNN              | TCATCCAATATTCTG         |
| M00135 | V\$OCT1_01 | 0.76783<br>7 | 9318 | (+) | NNNNWTATGCAAATNTNNN          | TCCAATATTCTGATTTAAT     |
| M00136 | V\$OCT1_02 | 0.80725<br>5 | 9318 | (+) | NNGAATATKCANNNN              | TCCAATATTCTGATT         |
| M00162 | V\$OCT1_06 | 0.85273<br>4 | 9321 | (+) | CWNAWTKWSATRYN               | AATATTCTGATTTA          |
| M00248 | V\$OCT1_07 | 0.81916<br>5 | 9321 | (+) | TNTATGNTAATT                 | AATATTCTGATT            |
| M00138 | V\$OCT1_04 | 0.87369<br>3 | 9328 | (-) | NNNNNNNNWATGCAAATNNNW<br>NNW | TGATTTAATTTGCAAAAATCAGA |
| M00138 | V\$OCT1_04 | 0.80322<br>3 | 9329 | (+) | NNNNNNNNWATGCAAATNNNW<br>NNW | GATTTAATTTGCAAAAATCAGAA |
| M00135 | V\$OCT1_01 | 0.81991<br>6 | 9330 | (-) | NNNNWTATGCAAATNTNNN          | ATTTAATTTGCAAAAATCA     |
| M00135 | V\$OCT1_01 | 0.83040<br>8 | 9331 | (+) | NNNNWTATGCAAATNTNNN          | TTTAATTTGCAAAAATCAG     |
| M00136 | V\$OCT1_02 | 0.79372<br>7 | 9331 | (+) | NNGAATATKCANNNN              | TTTAATTTGCAAAAA         |

|        |            |                    |      |                     |                              |                         |
|--------|------------|--------------------|------|---------------------|------------------------------|-------------------------|
| M00195 | V\$OCT1_Q6 | 0.84279<br>5       | 9332 | (-)                 | NNNNATGCAAATNAN              | TTAATTTGCAAAAAT         |
| M00162 | V\$OCT1_06 | 0.82109<br>4       | 9334 | (-)                 | CWNAWTKWSATRYN               | AATTTGCAAAAATC          |
| M00248 | V\$OCT1_07 | 0.87322<br>5       | 9334 | (-)                 | TNTATGNTAATT                 | AATTTGCAAAAA            |
| M00162 | V\$OCT1_06 | 0.82148<br>4       | 9349 | (-)                 | CWNAWTKWSATRYN               | GAAAACAAATGGTG          |
| M00137 | V\$OCT1_03 | 0.84472<br>5       | 9366 | (+)                 | NNNRTAATNANNN                | GTGGTAAAGAGCC           |
| M00135 | V\$OCT1_01 | 0.74360<br>9       | 9469 | (-)                 | NNNNWTATGCAAATNTNNN          | TTGAGAATTCCATAGACAA     |
| M00162 | V\$OCT1_06 | 0.86484<br>4       | 9472 | (-)                 | CWNAWTKWSATRYN               | AGAATTCCATAGAC          |
| M00162 | V\$OCT1_06 | 0.83984<br>4       | 9512 | (-)                 | CWNAWTKWSATRYN               | AGGATCACAGAGAG          |
| M00162 | V\$OCT1_06 | 0.82656<br>2       | 9550 | (-)                 | CWNAWTKWSATRYN               | CACAGCACAGAAAG          |
| M00135 | V\$OCT1_01 | 0.7686<br>9555     | (+)  | NNNNWTATGCAAATNTNNN | CACAGAAAGCAAATCTGTT          |                         |
| M00195 | V\$OCT1_Q6 | 0.81441<br>0.84765 | 9557 | (+)                 | NNNNATGCAAATNAN              | CAGAAAGCAAATCTG         |
| M00162 | V\$OCT1_06 | 6<br>0.82695       | 9558 | (-)                 | CWNAWTKWSATRYN               | AGAAAGCAAATCTG          |
| M00162 | V\$OCT1_06 | 3<br>0.83437       | 9569 | (+)                 | CWNAWTKWSATRYN               | CTGTTTTCAATTTT          |
| M00162 | V\$OCT1_06 | 5<br>0.78776       | 9570 | (-)                 | CWNAWTKWSATRYN               | TGTTTTCAATTTTC          |
| M00136 | V\$OCT1_02 | 4<br>0.76554       | 9595 | (+)                 | NNGAATATKCANNNN              | GATATAATGCACACT         |
| M00135 | V\$OCT1_01 | 8<br>0.83437       | 9606 | (+)                 | NNNNWTATGCAAATNTNNN          | CACTGTAAGCAAACTGTC      |
| M00162 | V\$OCT1_06 | 5<br>0.82929       | 9609 | (-)                 | CWNAWTKWSATRYN               | TGTAAGCAAACTG           |
| M00162 | V\$OCT1_06 | 7<br>0.85025       | 9650 | (+)                 | CWNAWTKWSATRYN               | CACTCAGTCATGTC          |
| M00137 | V\$OCT1_03 | 7<br>0.83164       | 9665 | (-)                 | NNNRTAATNANNN                | AACTCTTTGTGAC           |
| M00162 | V\$OCT1_06 | 1<br>0.83437       | 9667 | (+)                 | CWNAWTKWSATRYN               | CTCTTTGTGACACA          |
| M00162 | V\$OCT1_06 | 5<br>0.79721       | 9732 | (+)                 | CWNAWTKWSATRYN               | CATTCAAGTGATGCC         |
| M00195 | V\$OCT1_Q6 | 6<br>0.92338       | 9826 | (+)                 | NNNNATGCAAATNAN              | AGTTCTTCAAATCAG         |
| M00136 | V\$OCT1_02 | 9<br>0.93421       | 9876 | (-)                 | NNGAATATKCANNNN              | CCAGTGAATATTCAG         |
| M00136 | V\$OCT1_02 | 8<br>0.80078       | 9879 | (+)                 | NNGAATATKCANNNN              | GTGAATATTCAGGAC         |
| M00162 | V\$OCT1_06 | 1<br>0.85814       | 9882 | (-)                 | CWNAWTKWSATRYN               | AATATTCAGGACTG          |
| M00136 | V\$OCT1_02 | 8<br>0.90557       | 9910 | (-)                 | NNGAATATKCANNNN              | TGACTGAATAATTAT         |
| M00137 | V\$OCT1_03 | 1<br>0.78481       | 9914 | (+)                 | NNNRTAATNANNN                | TGAATAATTATTT           |
| M00138 | V\$OCT1_04 | 8<br>0.85420       | 9914 | (-)                 | NNNNNNNNWATGCAAATNNNW<br>NNW | TGAATAATTATTTATATCTGACT |
| M00137 | V\$OCT1_03 | 8<br>0.83835       | 9915 | (-)                 | NNNRTAATNANNN                | GAATAATTATTTA           |
| M00138 | V\$OCT1_04 | 2                  | 9915 | (+)                 | NNNNNNNNWATGCAAATNNNW<br>NNW | GAATAATTATTTATATCTGACTG |
| M00138 | V\$OCT1_04 | 0.789<br>0.77043   | 9916 | (-)                 | NNW                          | AATAATTATTTATATCTGACTGC |
| M00136 | V\$OCT1_02 | 9<br>0.80238       | 9917 | (+)                 | NNGAATATKCANNNN              | ATAATTATTTATATC         |
| M00136 | V\$OCT1_02 | 2                  | 9932 | (-)                 | NNGAATATKCANNNN              | TGACTGCATTATAAT         |

|        |            |              |       |     |                                         |                          |
|--------|------------|--------------|-------|-----|-----------------------------------------|--------------------------|
| M00138 | V\$OCT1_04 | 0.81095<br>8 | 9932  | (-) | NNNNNNNNWATGCAAATNNNW<br>NNW            | TGACTGCATTATAATATATTTTA  |
| M00162 | V\$OCT1_06 | 0.80429<br>7 | 9936  | (-) | CWNAWTKWSATRYN                          | TGCATTATAATATA           |
| M00162 | V\$OCT1_06 | 0.81210<br>9 | 9938  | (+) | CWNAWTKWSATRYN<br>NNNNNNNNWATGCAAATNNNW | CATTATAATATATT           |
| M00138 | V\$OCT1_04 | 0.81033<br>7 | 9941  | (+) | NNW<br>NNNNNNNNWATGCAAATNNNW            | TATAATATATTTTAAAGTTAAAAA |
| M00138 | V\$OCT1_04 | 0.78272<br>7 | 9942  | (-) | NNW<br>NNNNNNNNWATGCAAATNNNW            | ATAATATATTTTAAAGTTAAAAA  |
| M00138 | V\$OCT1_04 | 0.80259<br>3 | 9943  | (-) | NNW<br>NNNNNNNNWATGCAAATNNNW            | TAATATATTTTAAAGTTAAAAA   |
| M00248 | V\$OCT1_07 | 0.83167<br>3 | 9946  | (+) | TNTATGNTAATT<br>NNNNNNNNWATGCAAATNNNW   | TATATTTTAAAGT            |
| M00138 | V\$OCT1_04 | 0.78858<br>2 | 9947  | (+) | NNW<br>NNNNNNNNWATGCAAATNNNW            | ATATTTTAAAGTTAAAAAAATGC  |
| M00138 | V\$OCT1_04 | 0.78774<br>6 | 9958  | (+) | NNW<br>NNNNNNNNWATGCAAATNNNW            | TAAAAAAATGCAACACAGTTGG   |
| M00136 | V\$OCT1_02 | 0.81889<br>6 | 9960  | (+) | NNGAATATKCANNNN                         | AAAAAATGCAACAC           |
| M00195 | V\$OCT1_Q6 | 0.79503<br>3 | 9962  | (+) | NNNNATGCAAATNAN                         | AAAAATGCAACACAG          |
| M00162 | V\$OCT1_06 | 0.83476<br>6 | 9963  | (-) | CWNAWTKWSATRYN                          | AAAATGCAACACAG           |
| M00162 | V\$OCT1_06 | 0.81367<br>2 | 9979  | (+) | CWNAWTKWSATRYN                          | GGTTTTCTAATGTT           |
| M00137 | V\$OCT1_03 | 0.84551<br>6 | 9982  | (+) | NNNRTAATNANNN<br>NNNNNNNNWATGCAAATNNNW  | TTTCTAATGTTTT            |
| M00138 | V\$OCT1_04 | 0.78419<br>1 | 9986  | (+) | NNW<br>NNNNNNNNWATGCAAATNNNW            | TAATGTTTTTTTAAAAAAGAAT   |
| M00138 | V\$OCT1_04 | 0.80092<br>4 | 10005 | (+) | NNW<br>NNNNNNNNWATGCAAATNNNW            | GAATGATTGGGCTAATCCAAATT  |
| M00138 | V\$OCT1_04 | 0.80719<br>4 | 10011 | (+) | NNW<br>NNNNNNNNWATGCAAATNNNW            | TTGGGCTAATCCAAATTCTCTGT  |
| M00135 | V\$OCT1_01 | 0.75810<br>8 | 10013 | (+) | NNNNWTATGCAAATNTNNN                     | GGGCTAATCCAAATTCTCT      |
| M00195 | V\$OCT1_Q6 | 0.79366<br>8 | 10015 | (+) | NNNNATGCAAATNAN                         | GCTAATCCAAATTCT          |
| M00162 | V\$OCT1_06 | 0.80625<br>4 | 10016 | (-) | CWNAWTKWSATRYN                          | CTAATCCAAATTCT           |
| M00162 | V\$OCT1_06 | 0.85273<br>4 | 10043 | (-) | CWNAWTKWSATRYN                          | AACACTAAAGTAAG           |
| M00137 | V\$OCT1_03 | 0.84393<br>5 | 10052 | (-) | NNNRTAATNANNN                           | GTAAGATTATTAG            |
| M00162 | V\$OCT1_06 | 0.81601<br>6 | 10056 | (+) | CWNAWTKWSATRYN                          | GATTATTAGTTTCC           |
| M00162 | V\$OCT1_06 | 0.83437<br>5 | 10063 | (-) | CWNAWTKWSATRYN                          | AGTTTCCCATTTCTT          |
| M00162 | V\$OCT1_06 | 0.80078<br>1 | 10084 | (+) | CWNAWTKWSATRYN<br>NNNNNNNNWATGCAAATNNNW | GGGAAAGGGATACC           |
| M00138 | V\$OCT1_04 | 0.79234<br>6 | 10131 | (-) | NNW<br>NNNNNNNNWATGCAAATNNNW            | TTTTTCTCTTTGAATAGGAACAG  |
| M00136 | V\$OCT1_02 | 0.79723<br>9 | 10137 | (-) | NNGAATATKCANNNN                         | TCTTTGAATAGGAAC          |
| M00162 | V\$OCT1_06 | 0.84218<br>7 | 10152 | (-) | CWNAWTKWSATRYN                          | AGCTTCTCAGACTG           |
| M00162 | V\$OCT1_06 | 0.83437<br>5 | 10184 | (+) | CWNAWTKWSATRYN                          | CAGCTGGTAATGTT           |
| M00137 | V\$OCT1_03 | 0.90004<br>5 | 10187 | (+) | NNNRTAATNANNN<br>NNNNNNNNWATGCAAATNNNW  | CTGGTAATGTTTT            |
| M00138 | V\$OCT1_04 | 0.81409<br>5 | 10192 | (+) | NNW<br>NNNNNNNNWATGCAAATNNNW            | AATGTTTTATTATAATAATATAA  |

|        |            |              |       |     |                              |                         |
|--------|------------|--------------|-------|-----|------------------------------|-------------------------|
| M00138 | V\$OCT1_04 | 0.82517<br>8 | 10193 | (-) | NNNNNNNNWATGCAAATNNNW<br>NNW | ATGTTTATTATAATAATATAAA  |
| M00137 | V\$OCT1_03 | 0.85499<br>8 | 10195 | (-) | NNNRTAATNANNN                | GTTTATTATAAT            |
| M00138 | V\$OCT1_04 | 0.82015<br>9 | 10195 | (+) | NNNNNNNNWATGCAAATNNNW<br>NNW | GTTTATTATAATAATATAAAAT  |
| M00138 | V\$OCT1_04 | 0.81472<br>2 | 10196 | (-) | NNNNNNNNWATGCAAATNNNW<br>NNW | TTTTATTATAATAATATAAAATT |
| M00135 | V\$OCT1_01 | 0.74608<br>9 | 10197 | (+) | NNNNWTATGCAAATNTNNN          | TTTATTATAATAATATAAA     |
| M00137 | V\$OCT1_03 | 0.91070<br>7 | 10200 | (+) | NNNRTAATNANNN                | ATTATAATAATAT           |
| M00138 | V\$OCT1_04 | 0.81054<br>9 | 10201 | (+) | NNNNNNNNWATGCAAATNNNW<br>NNW | TTATAATAATATAAAATTAAGTC |
| M00162 | V\$OCT1_06 | 0.89960<br>9 | 10208 | (-) | CWNAWTKWSATRYN               | AATATAAAATTAAG          |
| M00138 | V\$OCT1_04 | 0.80823<br>9 | 10223 | (-) | NNNNNNNNWATGCAAATNNNW<br>NNW | CTACAGAATTAATAATTAAGT   |
| M00135 | V\$OCT1_01 | 0.78233<br>5 | 10225 | (-) | NNNNWTATGCAAATNTNNN          | ACAGAATTAATAATTAATTA    |
| M00195 | V\$OCT1_Q6 | 0.79421<br>4 | 10226 | (+) | NNNNATGCAAATNAN              | CAGAATTAATAAT           |
| M00162 | V\$OCT1_06 | 0.90898<br>4 | 10227 | (-) | CWNAWTKWSATRYN               | AGAATTAATAAT            |
| M00248 | V\$OCT1_07 | 0.91032<br>4 | 10229 | (-) | TNTATGNTAATT                 | AATTAATAAT              |
| M00137 | V\$OCT1_03 | 0.87633<br>3 | 10233 | (+) | NNNRTAATNANNN                | AAAATAATTAAGT           |
| M00137 | V\$OCT1_03 | 0.86448<br>9 | 10234 | (-) | NNNRTAATNANNN                | AAATAATTAAGTG           |
| M00162 | V\$OCT1_06 | 0.84726<br>6 | 10241 | (-) | CWNAWTKWSATRYN               | TAAGTGAAATTAC           |
| M00138 | V\$OCT1_04 | 0.80071<br>1 | 10247 | (-) | NNNNNNNNWATGCAAATNNNW<br>NNW | AAATTTACTTTGACTAAATTCTA |
| M00248 | V\$OCT1_07 | 0.81725<br>7 | 10248 | (-) | TNTATGNTAATT                 | AATTTACTTTGA            |
| M00162 | V\$OCT1_06 | 0.90195<br>3 | 10268 | (-) | CWNAWTKWSATRYN               | TACATCAAATCATG          |
| M00137 | V\$OCT1_03 | 0.84828<br>1 | 10298 | (-) | NNNRTAATNANNN                | GATTCATTATATT           |
| M00162 | V\$OCT1_06 | 0.84218<br>9 | 10299 | (+) | CWNAWTKWSATRYN               | ATTCATTATATTCT          |

|        |            |         |       |     |                       |                         |
|--------|------------|---------|-------|-----|-----------------------|-------------------------|
|        |            | 7       |       |     |                       |                         |
|        |            | 0.80468 |       |     |                       |                         |
| M00162 | V\$OCT1_06 | 7       | 10300 | (-) | CWNAWTKWSATRYN        | TTCATTATATTCTG          |
|        |            | 0.80859 |       |     |                       |                         |
| M00162 | V\$OCT1_06 | 4       | 10307 | (+) | CWNAWTKWSATRYN        | TATTCTGGAATTTA          |
|        |            | 0.80078 |       |     |                       |                         |
| M00162 | V\$OCT1_06 | 1       | 10323 | (+) | CWNAWTKWSATRYN        | CTGTATTTATTTTC          |
|        |            | 0.78481 |       |     | NNNNNNNNWATGCAAATNNNW |                         |
| M00138 | V\$OCT1_04 | 8       | 10324 | (-) | NNW                   | TGTATTTATTTTCCCAAATCCAG |
|        |            | 0.83437 |       |     |                       |                         |
| M00162 | V\$OCT1_06 | 5       | 10324 | (-) | CWNAWTKWSATRYN        | TGTATTTATTTTCC          |
|        |            | 0.83476 |       |     |                       |                         |
| M00162 | V\$OCT1_06 | 6       | 10338 | (-) | CWNAWTKWSATRYN        | CAAATCCAGTTCTG          |
|        |            | 0.78168 |       |     | NNNNNNNNWATGCAAATNNNW |                         |
| M00138 | V\$OCT1_04 | 1       | 10361 | (-) | NNW                   | TCCATACCTATGCCTCCTTGTA  |
|        |            | 0.86408 |       |     |                       |                         |
| M00137 | V\$OCT1_03 | 5       | 10390 | (-) | NNNRTAATNANNN         | AGATCATTGCCAA           |
|        |            | 0.789   |       |     | NNNNNNNNWATGCAAATNNNW |                         |
| M00138 | V\$OCT1_04 | 0.789   | 10396 | (-) | NNW                   | TTGCCAAATAAACATTCCATTTA |
|        |            | 0.80814 |       |     |                       |                         |
| M00248 | V\$OCT1_07 | 1       | 10402 | (-) | TNTATGNTAATT          | AATAAACATTCC            |
|        |            | 0.77883 |       |     |                       |                         |
| M00136 | V\$OCT1_02 | 1       | 10403 | (+) | NNGAATATKCANNNN       | ATAAACATTCCATT          |
| M00162 | V\$OCT1_06 | 0.85    | 10405 | (+) | CWNAWTKWSATRYN        | AAACATTCCATTTA          |
|        |            | 0.86835 |       |     |                       |                         |
| M00162 | V\$OCT1_06 | 9       | 10406 | (-) | CWNAWTKWSATRYN        | AACATTCCATTTAA          |
|        |            | 0.78607 |       |     | NNNNNNNNWATGCAAATNNNW |                         |
| M00138 | V\$OCT1_04 | 3       | 10407 | (-) | NNW                   | ACATTCCATTTAACAAATGT    |
|        |            | 0.83437 |       |     |                       |                         |
| M00162 | V\$OCT1_06 | 5       | 10411 | (-) | CWNAWTKWSATRYN        | TCCATTTAACAAAC          |
|        |            | 0.80859 |       |     |                       |                         |
| M00162 | V\$OCT1_06 | 4       | 10450 | (-) | CWNAWTKWSATRYN        | GGGATCCCATACAT          |
|        |            | 0.77012 |       |     |                       |                         |
| M00135 | V\$OCT1_01 | 6       | 10456 | (+) | NNNNWTATGCAAATNTNNN   | CCATACATTCAAATTGCTT     |
|        |            | 0.84552 |       |     |                       |                         |
| M00195 | V\$OCT1_Q6 | 4       | 10458 | (+) | NNNNATGCAAATNAN       | ATACATTCAAATTGC         |
|        |            | 0.84765 |       |     |                       |                         |
| M00162 | V\$OCT1_06 | 6       | 10459 | (-) | CWNAWTKWSATRYN        | TACATTCAAATTGC          |
|        |            | 0.85838 |       |     |                       |                         |
| M00248 | V\$OCT1_07 | 5       | 10459 | (+) | TNTATGNTAATT          | TACATTCAAATT            |

|        |            |                  |       |                              |                              |                         |
|--------|------------|------------------|-------|------------------------------|------------------------------|-------------------------|
| M00162 | V\$OCT1_06 | 0.87343<br>7     | 10474 | (-)                          | CWNAWTKWSATRYN               | TTCATCAAAATTTT          |
| M00162 | V\$OCT1_06 | 0.83437<br>5     | 10495 | (+)                          | CWNAWTKWSATRYN               | AGAATTGGCAGGTT          |
| M00137 | V\$OCT1_03 | 0.88344<br>5     | 10514 | (-)                          | NNNRTAATNANNN                | ATCTCATTTGCTC           |
| M00138 | V\$OCT1_04 | 0.80782<br>1     | 10563 | (+)                          | NNNNNNNNWATGCAAATNNNW<br>NNW | ACGTTGTTTTGAATATTGAATGA |
| M00135 | V\$OCT1_01 | 0.78004<br>6     | 10564 | (-)                          | NNNNWTATGCAAATNTNNN          | CGTTGTTTTGAATATTGAA     |
| M00162 | V\$OCT1_06 | 0.81367<br>2     | 10566 | (+)                          | CWNAWTKWSATRYN               | TTGTTTTGAATATT          |
| M00136 | V\$OCT1_02 | 0.89036<br>3     | 10568 | (-)                          | NNGAATATKCANNNN              | GTTTTGAATATTGAA         |
| M00136 | V\$OCT1_02 | 0.81700<br>1     | 10571 | (+)                          | NNGAATATKCANNNN              | TTGAATATTGAATGA         |
| M00162 | V\$OCT1_06 | 0.81640<br>6     | 10573 | (+)                          | CWNAWTKWSATRYN               | GAATATTGAATGAG          |
| M00138 | V\$OCT1_04 | 0.78314<br>5     | 10619 | (+)                          | NNNNNNNNWATGCAAATNNNW<br>NNW | TTGTGGCAAGTCCAATAAAATGT |
| M00162 | V\$OCT1_06 | 0.82187<br>5     | 10674 | (+)                          | CWNAWTKWSATRYN               | CTCTATAAAATTTG          |
| M00137 | V\$OCT1_03 | 0.89569<br>3     | 10708 | (-)                          | NNNRTAATNANNN                | ACAATATTATGAA           |
| M00138 | V\$OCT1_04 | 0.78272<br>7     | 10708 | (+)                          | NNNNNNNNWATGCAAATNNNW<br>NNW | ACAATATTATGAAGGTTTTTTTT |
| M00137 | V\$OCT1_03 | 0.84354<br>10726 | (+)   | NNNRTAATNANNN                |                              | TTTTAATCACAG            |
| M00138 | V\$OCT1_04 | 0.84609<br>10755 | (-)   | NNNNNNNNWATGCAAATNNNW<br>NNW |                              | CTGGTTAATTAGCATTTTTATCT |
| M00135 | V\$OCT1_01 | 0.84261<br>7     | 10757 | (-)                          | NNNNWTATGCAAATNTNNN          | GGTTAATTAGCATTTTTAT     |
| M00161 | V\$OCT1_05 | 0.89623<br>1     | 10759 | (+)                          | MKNATTGCATAYY                | TTAATTAGCATTTT          |
| M00195 | V\$OCT1_Q6 | 0.87745<br>6     | 10759 | (-)                          | NNNNATGCAAATNAN              | TTAATTAGCATTTTT         |
| M00136 | V\$OCT1_02 | 0.79696<br>8     | 10761 | (-)                          | NNGAATATKCANNNN              | AATTAGCATTTTTAT         |
| M00248 | V\$OCT1_07 | 0.92177<br>2     | 10761 | (-)                          | TNTATGNTAATT                 | AATTAGCATTTT            |
| M00138 | V\$OCT1_04 | 0.80614<br>10768 | (-)   | NNNNNNNNWATGCAAATNNNW        |                              | ATTTTATCTTGAATGTAAATTA  |

|        |            |         |       |     |                       |                         |
|--------|------------|---------|-------|-----|-----------------------|-------------------------|
|        |            | 8       |       |     | NNW                   |                         |
|        |            | 0.82148 |       |     |                       |                         |
| M00162 | V\$OCT1_06 | 4       | 10772 | (+) | CWNAWTKWSATRYN        | TTATCTGAATGTA           |
|        |            | 0.81451 |       |     | NNNNNNNNWATGCAAATNNNW |                         |
| M00138 | V\$OCT1_04 | 3       | 10773 | (+) | NNW                   | TATCTGAATGTAAATTAATGTC  |
|        |            | 0.77964 |       |     |                       |                         |
| M00136 | V\$OCT1_02 | 3       | 10774 | (-) | NNGAATATKCANNNN       | ATCTTGAATGTAAAT         |
|        |            | 0.75066 |       |     |                       |                         |
| M00135 | V\$OCT1_01 | 8       | 10775 | (+) | NNNNWTATGCAAATNTNNN   | TCTTGAATGTAAATTAATG     |
| M00195 | V\$OCT1_Q6 | 0.84798 | 10777 | (+) | NNNNATGCAAATNAN       | TTGAATGTAAATTAA         |
| M00162 | V\$OCT1_06 | 0.88125 | 10778 | (-) | CWNAWTKWSATRYN        | TGAATGTAAATTAA          |
| M00248 | V\$OCT1_07 | 0.9152  | 10778 | (+) | TNTATGNTAATT          | TGAATGTAAATT            |
|        |            | 0.78753 |       |     | NNNNNNNNWATGCAAATNNNW |                         |
| M00138 | V\$OCT1_04 | 7       | 10779 | (+) | NNW                   | GAATGTAAATTAATGTCATAAAA |
|        |            | 0.87343 |       |     |                       |                         |
| M00162 | V\$OCT1_06 | 7       | 10787 | (+) | CWNAWTKWSATRYN        | ATTAATGTCATAAA          |
|        |            | 0.80117 |       |     |                       |                         |
| M00162 | V\$OCT1_06 | 2       | 10803 | (+) | CWNAWTKWSATRYN        | TAATAATACATGTT          |
|        |            | 0.82109 |       |     |                       |                         |
| M00162 | V\$OCT1_06 | 4       | 10804 | (-) | CWNAWTKWSATRYN        | AATAATACATGTTT          |
|        |            | 0.74208 |       |     |                       |                         |
| M00135 | V\$OCT1_01 | 3       | 10823 | (+) | NNNNWTATGCAAATNTNNN   | TTTTTTAAGGAAATTGTTC     |
|        |            | 0.86919 |       |     |                       |                         |
| M00248 | V\$OCT1_07 | 7       | 10826 | (+) | TNTATGNTAATT          | TTTAAGGAAATT            |
|        |            | 0.87475 |       |     |                       |                         |
| M00137 | V\$OCT1_03 | 3       | 10861 | (-) | NNNRTAATNANNN         | ATATATTTACTAA           |
|        |            | 0.82109 |       |     |                       |                         |
| M00162 | V\$OCT1_06 | 4       | 10862 | (-) | CWNAWTKWSATRYN        | TATATTTACTAAAT          |
|        |            | 0.80820 |       |     |                       |                         |
| M00162 | V\$OCT1_06 | 3       | 10865 | (+) | CWNAWTKWSATRYN        | ATTTACTAAATTTA          |
|        |            | 0.80280 |       |     | NNNNNNNNWATGCAAATNNNW |                         |
| M00138 | V\$OCT1_04 | 2       | 10866 | (+) | NNW                   | TTTACTAAATTTAAAATATATTA |
|        |            | 0.78419 |       |     | NNNNNNNNWATGCAAATNNNW |                         |
| M00138 | V\$OCT1_04 | 1       | 10867 | (+) | NNW                   | TTACTAAATTTAAAATATATTAA |
|        |            | 0.79004 |       |     | NNNNNNNNWATGCAAATNNNW |                         |
| M00138 | V\$OCT1_04 | 6       | 10867 | (-) | NNW                   | TTACTAAATTTAAAATATATTAA |
|        |            | 0.81095 |       |     | NNNNNNNNWATGCAAATNNNW |                         |
| M00138 | V\$OCT1_04 | 8       | 10868 | (-) | NNW                   | TACTAAATTTAAAATATATTAAA |
| M00135 | V\$OCT1_01 |         | 10870 | (-) | NNNNWTATGCAAATNTNNN   | CTAAATTTAAAATATATTA     |
|        |            | 0.73044 |       |     |                       |                         |



|        |            |         |       |     |                       |                          |
|--------|------------|---------|-------|-----|-----------------------|--------------------------|
|        |            | 6       |       |     |                       |                          |
|        |            | 0.86562 |       |     |                       |                          |
| M00162 | V\$OCT1_06 | 5       | 10870 | (+) | CWNAWTKWSATRYN        | CTAAATTAAAAATA           |
|        |            | 0.89062 |       |     |                       |                          |
| M00162 | V\$OCT1_06 | 5       | 10871 | (-) | CWNAWTKWSATRYN        | TAAATTAAAAATAT           |
|        |            | 0.83437 |       |     |                       |                          |
| M00162 | V\$OCT1_06 | 5       | 10872 | (+) | CWNAWTKWSATRYN        | AAATTAAAAATATA           |
|        |            | 0.83167 |       |     |                       |                          |
| M00248 | V\$OCT1_07 | 3       | 10874 | (-) | TNTATGNTAATT          | ATTTAAAAATATA            |
|        |            | 0.91914 |       |     |                       |                          |
| M00162 | V\$OCT1_06 | 1       | 10881 | (+) | CWNAWTKWSATRYN        | ATATATTAAATGCA           |
|        |            | 0.89062 |       |     |                       |                          |
| M00162 | V\$OCT1_06 | 5       | 10882 | (-) | CWNAWTKWSATRYN        | TATATTAAATGCAC           |
|        |            | 0.86328 |       |     |                       |                          |
| M00162 | V\$OCT1_06 | 1       | 10893 | (+) | CWNAWTKWSATRYN        | CACTATAAGATGTG           |
|        |            | 0.75486 |       |     |                       |                          |
| M00135 | V\$OCT1_01 | 5       | 10897 | (-) | NNNNWTATGCAAATNTNNN   | ATAAGATGTGCATTTGAAC      |
|        |            | 0.80859 |       |     |                       |                          |
| M00162 | V\$OCT1_06 | 4       | 10899 | (+) | CWNAWTKWSATRYN        | AAGATGTGCATTTG           |
|        |            | 0.79290 |       |     |                       |                          |
| M00136 | V\$OCT1_02 | 7       | 10901 | (-) | NNGAATATKCANNNN       | GATGTGCATTTGAAC          |
|        |            |         |       |     | NNNNNNNNWATGCAAATNNNW |                          |
| M00138 | V\$OCT1_04 | 0.81765 | 10961 | (-) | NNW                   | AGTATCTATTAGCACAAATCCAGC |
|        |            | 0.80942 |       |     |                       |                          |
| M00135 | V\$OCT1_01 | 4       | 10963 | (-) | NNNNWTATGCAAATNTNNN   | TATCTATTAGCACAAATCCA     |
|        |            | 0.81074 |       |     | NNNNNNNNWATGCAAATNNNW |                          |
| M00138 | V\$OCT1_04 | 9       | 10984 | (-) | NNW                   | TTCATCTTTAGCATCAATCCTT   |
|        |            | 0.74360 |       |     |                       |                          |
| M00135 | V\$OCT1_01 | 9       | 10986 | (-) | NNNNWTATGCAAATNTNNN   | CACTATTTAGCATCAATCC      |
|        |            | 0.80199 |       |     |                       |                          |
| M00248 | V\$OCT1_07 | 3       | 10990 | (-) | TNTATGNTAATT          | ATTTAGCATCAA             |
|        |            | 0.78356 |       |     | NNNNNNNNWATGCAAATNNNW |                          |
| M00138 | V\$OCT1_04 | 3       | 10998 | (-) | NNW                   | TCAATCCTTTTGAGTATCATAGT  |
|        |            | 0.78314 |       |     | NNNNNNNNWATGCAAATNNNW |                          |
| M00138 | V\$OCT1_04 | 5       | 11003 | (-) | NNW                   | CCTTTTGAGTATCATAGTTTTTC  |
|        |            | 0.85273 |       |     |                       |                          |
| M00162 | V\$OCT1_06 | 4       | 11010 | (-) | CWNAWTKWSATRYN        | AGTATCATAGTTTT           |
|        |            | 0.81328 |       |     |                       |                          |
| M00162 | V\$OCT1_06 | 1       | 11040 | (+) | CWNAWTKWSATRYN        | AAATTTTTGTTTTA           |
|        |            |         |       |     |                       |                          |
| M00138 | V\$OCT1_04 |         | 11049 | (+) |                       | TTTAGTTATACCAAATAAGCTT   |
|        |            | 0.79109 |       |     | NNNNNNNNWATGCAAATNNNW |                          |

|        |            |         |       |     |                       |                        |
|--------|------------|---------|-------|-----|-----------------------|------------------------|
|        |            | 2       |       |     | NNW                   |                        |
|        |            | 0.79683 |       |     |                       |                        |
| M00135 | V\$OCT1_01 | 3       | 11104 | (-) | NNNNWTATGCAAATNTNNN   | CTTAATTTAGCAAAAATTAC   |
|        |            | 0.73998 |       |     |                       |                        |
| M00135 | V\$OCT1_01 | 5       | 11105 | (+) | NNNNWTATGCAAATNTNNN   | TTAATTTAGCAAAAATTACA   |
|        |            | 0.75257 |       |     |                       |                        |
| M00135 | V\$OCT1_01 | 5       | 11112 | (-) | NNNNWTATGCAAATNTNNN   | AGCAAAATTACATTTTCAC    |
|        |            | 0.97929 |       |     |                       |                        |
| M00162 | V\$OCT1_06 | 7       | 11114 | (+) | CWNAWTKWSATRYN        | CAAAATTACATTTT         |
|        |            | 0.80376 |       |     |                       |                        |
| M00195 | V\$OCT1_Q6 | 6       | 11114 | (-) | NNNNATGCAAATNAN       | CAAAATTACATTTTC        |
|        |            | 0.92460 |       |     |                       |                        |
| M00162 | V\$OCT1_06 | 9       | 11115 | (-) | CWNAWTKWSATRYN        | AAAATTACATTTTC         |
|        |            | 0.80806 |       |     |                       |                        |
| M00136 | V\$OCT1_02 | 7       | 11116 | (-) | NNGAATATKCANNNN       | AAATTACATTTTCAC        |
|        |            | 0.82329 |       |     | NNNNNNNNWATGCAAATNNNW |                        |
| M00138 | V\$OCT1_04 | 6       | 11116 | (-) | NNW                   | AAATTACATTTTCACATTTTAT |
|        |            | 0.79308 |       |     |                       |                        |
| M00248 | V\$OCT1_07 | 9       | 11116 | (-) | TNTATGNTAATT          | AAATTACATTTT           |
|        |            | 0.76650 |       |     |                       |                        |
| M00135 | V\$OCT1_01 | 1       | 11118 | (-) | NNNNWTATGCAAATNTNNN   | ATTACATTTTCACATTTT     |
|        |            | 0.86835 |       |     |                       |                        |
| M00162 | V\$OCT1_06 | 9       | 11122 | (+) | CWNAWTKWSATRYN        | CATTTTCACATTTT         |
|        |            | 0.87382 |       |     |                       |                        |
| M00162 | V\$OCT1_06 | 8       | 11128 | (+) | CWNAWTKWSATRYN        | CACATTTTATTCT          |
|        |            | 0.85025 |       |     |                       |                        |
| M00137 | V\$OCT1_03 | 7       | 11129 | (-) | NNNRTAATNANNN         | ACATTTTATTCT           |
|        |            | 0.80859 |       |     |                       |                        |
| M00162 | V\$OCT1_06 | 4       | 11161 | (-) | CWNAWTKWSATRYN        | GGAAGTCAATAATG         |
|        |            | 0.88858 |       |     |                       |                        |
| M00137 | V\$OCT1_03 | 2       | 11166 | (+) | NNNRTAATNANNN         | TCAATAATGAATT          |
|        |            | 0.82148 |       |     |                       |                        |
| M00162 | V\$OCT1_06 | 4       | 11167 | (+) | CWNAWTKWSATRYN        | CAATAATGAATTTA         |
|        |            | 0.78911 |       |     |                       |                        |
| M00136 | V\$OCT1_02 | 7       | 11169 | (-) | NNGAATATKCANNNN       | ATAATGAATTTAATT        |
|        |            | 0.89101 |       |     |                       |                        |
| M00162 | V\$OCT1_06 | 6       | 11172 | (+) | CWNAWTKWSATRYN        | ATGAATTTAATTTG         |
|        |            | 0.88164 |       |     |                       |                        |
| M00162 | V\$OCT1_06 | 1       | 11173 | (-) | CWNAWTKWSATRYN        | TGAATTTAATTTGG         |
|        |            |         |       |     |                       |                        |
| M00162 | V\$OCT1_06 |         | 11209 | (-) | CWNAWTKWSATRYN        | AGTTTCCAATTTTG         |
|        |            | 0.87343 |       |     |                       |                        |

|        |            |              |       |     |                              |                         |
|--------|------------|--------------|-------|-----|------------------------------|-------------------------|
| M00138 | V\$OCT1_04 | 0.78126<br>3 | 11246 | (+) | NNNNNNNNWATGCAAATNNNW<br>NNW | CCAAATAAATTTAGATATATCAG |
| M00138 | V\$OCT1_04 | 0.80761<br>2 | 11247 | (-) | NNNNNNNNWATGCAAATNNNW<br>NNW | CAAATAAATTTAGATATATCAGT |
| M00135 | V\$OCT1_01 | 0.80236<br>6 | 11249 | (-) | NNNNWTATGCAAATNTNNN          | AATAAATTTAGATATATCA     |
| M00162 | V\$OCT1_06 | 0.89414<br>1 | 11251 | (+) | CWNAWTKWSATRYN               | TAAATTTAGATATA          |
| M00248 | V\$OCT1_07 | 0.86750<br>1 | 11253 | (-) | TNTATGNTAATT                 | AATTTAGATATA            |
| M00162 | V\$OCT1_06 | 0.83476<br>6 | 11259 | (-) | CWNAWTKWSATRYN               | GATATATCAGTACC          |
| M00162 | V\$OCT1_06 | 0.86093<br>7 | 11272 | (+) | CWNAWTKWSATRYN               | CTCAATCAAATTTA          |
| M00162 | V\$OCT1_06 | 0.85273<br>4 | 11273 | (-) | CWNAWTKWSATRYN               | TCAATCAAATTTAT          |
| M00138 | V\$OCT1_04 | 0.80238<br>4 | 11275 | (-) | NNNNNNNNWATGCAAATNNNW<br>NNW | AATCAAATTTATCATTACTAATC |
| M00138 | V\$OCT1_04 | 0.78523<br>6 | 11280 | (+) | NNNNNNNNWATGCAAATNNNW<br>NNW | AATTTATCATTACTAATCTAAGA |
| M00137 | V\$OCT1_03 | 0.94705<br>6 | 11283 | (-) | NNNRTAATNANNN                | TTATCATTACTAA           |
| M00162 | V\$OCT1_06 | 0.80078<br>1 | 11292 | (-) | CWNAWTKWSATRYN               | CTAATCTAAGAAAT          |
| M00138 | V\$OCT1_04 | 0.81639<br>5 | 11296 | (-) | NNNNNNNNWATGCAAATNNNW<br>NNW | TCTAAGAAATTACATGAATAATA |
| M00137 | V\$OCT1_03 | 0.84037<br>9 | 11299 | (-) | NNNRTAATNANNN                | AAGAAATTACATG           |
| M00138 | V\$OCT1_04 | 0.79736<br>5 | 11300 | (-) | NNNNNNNNWATGCAAATNNNW<br>NNW | AGAAATTACATGAATAATATATT |
| M00162 | V\$OCT1_06 | 0.87617<br>2 | 11300 | (+) | CWNAWTKWSATRYN               | AGAAATTACATGAA          |
| M00138 | V\$OCT1_04 | 0.81304<br>9 | 11301 | (+) | NNNNNNNNWATGCAAATNNNW<br>NNW | GAAATTACATGAATAATATATTT |
| M00162 | V\$OCT1_06 | 0.87773<br>4 | 11301 | (-) | CWNAWTKWSATRYN               | GAAATTACATGAAT          |
| M00248 | V\$OCT1_07 | 0.81238<br>1 | 11302 | (-) | TNTATGNTAATT                 | AAATTACATGAA            |
| M00136 | V\$OCT1_02 | 0.86031      | 11306 | (-) | NNGAATATKCANNNN              | TACATGAATAATATA         |

|        |            |         |       |     |                       |                         |
|--------|------------|---------|-------|-----|-----------------------|-------------------------|
|        |            | 4       |       |     |                       |                         |
|        |            | 0.83398 |       |     |                       |                         |
| M00162 | V\$OCT1_06 | 4       | 11306 | (-) | CWNAWTKWSATRYN        | TACATGAATAATAT          |
|        |            | 0.91821 |       |     |                       |                         |
| M00137 | V\$OCT1_03 | 4       | 11340 | (-) | NNNRTAATNANNN         | ATATGATTAGGCC           |
|        |            | 0.79192 |       |     | NNNNNNNNWATGCAAATNNNW |                         |
| M00138 | V\$OCT1_04 | 8       | 11419 | (-) | NNW                   | GCTCATAGTATTCATTATTATT  |
|        |            | 0.84136 |       |     |                       |                         |
| M00136 | V\$OCT1_02 | 4       | 11422 | (+) | NNGAATATKCANNNN       | CATAGTATTCATTAT         |
|        |            | 0.89450 |       |     |                       |                         |
| M00137 | V\$OCT1_03 | 8       | 11427 | (-) | NNNRTAATNANNN         | TATTCATTATTAT           |
|        |            | 0.89845 |       |     |                       |                         |
| M00137 | V\$OCT1_03 | 9       | 11430 | (-) | NNNRTAATNANNN         | TCATTATTATTTA           |
|        |            | 0.78749 |       |     |                       |                         |
| M00136 | V\$OCT1_02 | 3       | 11432 | (+) | NNGAATATKCANNNN       | ATTATTATTTATTTC         |
|        |            | 0.84726 |       |     |                       |                         |
| M00162 | V\$OCT1_06 | 6       | 11438 | (+) | CWNAWTKWSATRYN        | ATTTATTTCATAGA          |
|        |            | 0.82148 |       |     |                       |                         |
| M00162 | V\$OCT1_06 | 4       | 11439 | (-) | CWNAWTKWSATRYN        | TTTATTTCATAGAT          |
|        |            | 0.78941 |       |     | NNNNNNNNWATGCAAATNNNW |                         |
| M00138 | V\$OCT1_04 | 9       | 11457 | (-) | NNW                   | CCTAGCATTTAGCATAGACCCCC |
|        |            | 0.79320 |       |     |                       |                         |
| M00135 | V\$OCT1_01 | 9       | 11459 | (-) | NNNNWTATGCAAATNTNNN   | TAGCATTTAGCATAGACCC     |
|        |            | 0.90205 |       |     |                       |                         |
| M00248 | V\$OCT1_07 | 6       | 11463 | (-) | TNTATGNTAATT          | ATTTAGCATAGA            |
|        |            | 0.89101 |       |     |                       |                         |
| M00162 | V\$OCT1_06 | 6       | 11482 | (-) | CWNAWTKWSATRYN        | TGAATGAAAGTGCC          |
|        |            | 0.82148 |       |     |                       |                         |
| M00162 | V\$OCT1_06 | 4       | 11499 | (-) | CWNAWTKWSATRYN        | CAAATGTCTGTTAT          |
|        |            | 0.80078 |       |     |                       |                         |
| M00162 | V\$OCT1_06 | 1       | 11502 | (+) | CWNAWTKWSATRYN        | ATGTCTGTATTCA           |
|        |            | 0.77666 |       |     |                       |                         |
| M00136 | V\$OCT1_02 | 5       | 11505 | (+) | NNGAATATKCANNNN       | TCTGTTATTCACACA         |
|        |            | 0.80585 |       |     |                       |                         |
| M00162 | V\$OCT1_06 | 9       | 11525 | (-) | CWNAWTKWSATRYN        | AAAATCAATGTACT          |
|        |            | 0.87712 |       |     |                       |                         |
| M00137 | V\$OCT1_03 | 4       | 11539 | (+) | NNNRTAATNANNN         | AAGATAAAGAGAT           |
|        |            | 0.79520 |       |     |                       |                         |
| M00248 | V\$OCT1_07 | 9       | 11574 | (-) | TNTATGNTAATT          | CATGACCATATA            |
|        |            |         |       |     |                       |                         |
| M00138 | V\$OCT1_04 |         | 11576 | (-) |                       | TGACCATATAAGACTATTTACTA |
|        |            | 0.78084 |       |     | NNNNNNNNWATGCAAATNNNW |                         |

|        |            |         |       |     |                       |                          |
|--------|------------|---------|-------|-----|-----------------------|--------------------------|
|        |            | 5       |       |     | NNW                   |                          |
|        |            | 0.80996 |       |     |                       |                          |
| M00136 | V\$OCT1_02 | 2       | 11585 | (+) | NNGAATATKCANNNN       | AAGACTATTTACTAA          |
|        |            | 0.81328 |       |     |                       |                          |
| M00162 | V\$OCT1_06 | 1       | 11597 | (-) | CWNAWTKWSATRYN        | TAAATCTAGAATAT           |
|        |            | 0.86054 |       |     |                       |                          |
| M00162 | V\$OCT1_06 | 7       | 11606 | (-) | CWNAWTKWSATRYN        | AATATCTTAGTATT           |
|        |            | 0.78419 |       |     | NNNNNNNNWATGCAAATNNNW |                          |
| M00138 | V\$OCT1_04 | 1       | 11629 | (-) | NNW                   | TGTTGTTTTTATAATGTGTGTTT  |
|        |            | 0.81367 |       |     |                       |                          |
| M00162 | V\$OCT1_06 | 2       | 11633 | (+) | CWNAWTKWSATRYN        | GTTTTTATAATGTG           |
|        |            | 0.86171 |       |     |                       |                          |
| M00137 | V\$OCT1_03 | 5       | 11636 | (+) | NNNRTAATNANNN         | TTTATAATGTGTG            |
|        |            | 0.79171 |       |     | NNNNNNNNWATGCAAATNNNW |                          |
| M00138 | V\$OCT1_04 | 9       | 11653 | (-) | NNW                   | TCITTCITTTTTAACAGAAATAA  |
|        |            | 0.80133 |       |     | NNNNNNNNWATGCAAATNNNW |                          |
| M00138 | V\$OCT1_04 | 8       | 11655 | (-) | NNW                   | TTTCTTTTTTAACAGAAATAAAT  |
|        |            | 0.78502 |       |     | NNNNNNNNWATGCAAATNNNW |                          |
| M00138 | V\$OCT1_04 | 7       | 11659 | (-) | NNW                   | TTTTTTAACAGAAATAAATAAAA  |
|        |            | 0.88320 |       |     |                       |                          |
| M00162 | V\$OCT1_06 | 3       | 11678 | (-) | CWNAWTKWSATRYN        | AAAATCCAAGGGAG           |
|        |            | 0.85546 |       |     |                       |                          |
| M00162 | V\$OCT1_06 | 9       | 11708 | (-) | CWNAWTKWSATRYN        | CATATTGATAATG            |
|        |            | 0.88897 |       |     |                       |                          |
| M00137 | V\$OCT1_03 | 7       | 11713 | (+) | NNNRTAATNANNN         | TTGATAATGTTTT            |
|        |            |         |       |     | NNNNNNNNWATGCAAATNNNW |                          |
| M00138 | V\$OCT1_04 | 0.84128 | 11718 | (+) | NNW                   | AATGTTTTATTTAAAATTTATAA  |
|        |            | 0.80301 |       |     | NNNNNNNNWATGCAAATNNNW |                          |
| M00138 | V\$OCT1_04 | 1       | 11719 | (+) | NNW                   | ATGTTTTATTTAAAATTTATAAA  |
|        |            | 0.73273 |       |     |                       |                          |
| M00135 | V\$OCT1_01 | 6       | 11720 | (+) | NNNNWTATGCAAATNTNNN   | TGTTTTATTTAAAATTTAT      |
|        |            | 0.85152 |       |     | NNNNNNNNWATGCAAATNNNW |                          |
| M00138 | V\$OCT1_04 | 7       | 11720 | (-) | NNW                   | TGTTTTATTTAAAATTTATAAAA  |
|        |            | 0.83437 |       |     |                       |                          |
| M00162 | V\$OCT1_06 | 5       | 11723 | (-) | CWNAWTKWSATRYN        | TTTATTTAAAATTT           |
|        |            | 0.80771 |       |     |                       |                          |
| M00248 | V\$OCT1_07 | 7       | 11723 | (+) | TNTATGNTAATT          | TTTATTTAAAAT             |
|        |            | 0.80489 |       |     | NNNNNNNNWATGCAAATNNNW |                          |
| M00138 | V\$OCT1_04 | 3       | 11725 | (+) | NNW                   | TATTTAAAATTTATAAAAAGATAA |
|        |            |         |       |     |                       |                          |
| M00162 | V\$OCT1_06 |         | 11730 | (-) | CWNAWTKWSATRYN        | AAAATTTATAAAAAG          |
|        |            | 0.82656 |       |     |                       |                          |

|        |            |         |       |     |                       |                         |  |
|--------|------------|---------|-------|-----|-----------------------|-------------------------|--|
|        |            | 2       |       |     |                       |                         |  |
|        |            | 0.81785 |       |     | NNNNNNNNWATGCAAATNNNW |                         |  |
| M00138 | V\$OCT1_04 | 9       | 11741 | (+) | NNW                   | AAGATAAAATGTAAATGAGTGAT |  |
|        |            | 0.75791 |       |     |                       |                         |  |
| M00135 | V\$OCT1_01 | 7       | 11743 | (+) | NNNNWTATGCAAATNTNNN   | GATAAAATGTAAATGAGTG     |  |
|        |            | 0.88373 |       |     |                       |                         |  |
| M00195 | V\$OCT1_Q6 | 4       | 11745 | (+) | NNNNATGCAAATNAN       | TAAAATGTAAATGAG         |  |
|        |            | 0.89623 |       |     |                       |                         |  |
| M00161 | V\$OCT1_05 | 1       | 11746 | (-) | MKNATTTGCATAYY        | AAAATGTAAATGAG          |  |
|        |            | 0.95078 |       |     |                       |                         |  |
| M00162 | V\$OCT1_06 | 1       | 11746 | (-) | CWNAWTKWSATRYN        | AAAATGTAAATGAG          |  |
|        |            | 0.79308 |       |     |                       |                         |  |
| M00248 | V\$OCT1_07 | 9       | 11746 | (+) | TNTATGNTAATT          | AAAATGTAAATG            |  |
|        |            | 0.82512 |       |     |                       |                         |  |
| M00136 | V\$OCT1_02 | 2       | 11762 | (+) | NNGAATATKCANNNN       | ATTAATAGTCATGAA         |  |
|        |            | 0.73655 |       |     |                       |                         |  |
| M00135 | V\$OCT1_01 | 1       | 11819 | (+) | NNNNWTATGCAAATNTNNN   | CCAGATATGAAACTTATAG     |  |
|        |            | 0.88610 |       |     |                       |                         |  |
| M00161 | V\$OCT1_05 | 3       | 11822 | (-) | MKNATTTGCATAYY        | GATATGAAACTTAT          |  |
|        |            | 0.86054 |       |     |                       |                         |  |
| M00162 | V\$OCT1_06 | 7       | 11822 | (-) | CWNAWTKWSATRYN        | GATATGAAACTTAT          |  |
|        |            | 0.80820 |       |     |                       |                         |  |
| M00162 | V\$OCT1_06 | 3       | 11829 | (+) | CWNAWTKWSATRYN        | AACTTATAGATTCT          |  |
|        |            | 0.79530 |       |     |                       |                         |  |
| M00195 | V\$OCT1_Q6 | 6       | 11845 | (+) | NNNNATGCAAATNAN       | ATCCTTCCAAATTAT         |  |
|        |            | 0.85460 |       |     |                       |                         |  |
| M00137 | V\$OCT1_03 | 3       | 11850 | (-) | NNNRTAATNANNN         | TCCAAATTATAGC           |  |
|        |            | 0.80468 |       |     | NNNNNNNNWATGCAAATNNNW |                         |  |
| M00138 | V\$OCT1_04 | 4       | 11869 | (-) | NNW                   | AACATTGAGTTGAATATTTTTTC |  |
|        |            | 0.89875 |       |     |                       |                         |  |
| M00136 | V\$OCT1_02 | 5       | 11875 | (-) | NNGAATATKCANNNN       | GAGTTGAATATTTTT         |  |
|        |            | 0.79913 |       |     |                       |                         |  |
| M00136 | V\$OCT1_02 | 4       | 11878 | (+) | NNGAATATKCANNNN       | TTGAATATTTTTTCT         |  |
|        |            | 0.83437 |       |     |                       |                         |  |
| M00162 | V\$OCT1_06 | 5       | 11901 | (-) | CWNAWTKWSATRYN        | AAAATGAAAGCTAT          |  |
|        |            |         |       |     | NNNNNNNNWATGCAAATNNNW |                         |  |
| M00138 | V\$OCT1_04 | 0.7821  | 11908 | (+) | NNW                   | AAGCTATATTGCTAATTTTCAAA |  |
|        |            | 0.74952 |       |     |                       |                         |  |
| M00135 | V\$OCT1_01 | 3       | 11910 | (+) | NNNNWTATGCAAATNTNNN   | GCTATATTGCTAATTTTCA     |  |
|        |            |         |       |     |                       |                         |  |
| M00248 | V\$OCT1_07 |         | 11913 | (+) | TNTATGNTAATT          | ATATTGCTAATT            |  |
|        |            | 0.82382 |       |     |                       |                         |  |

|        |            |         |       |     |                       |                         |
|--------|------------|---------|-------|-----|-----------------------|-------------------------|
|        |            | 9       |       |     |                       |                         |
|        |            | 0.74952 |       |     |                       |                         |
| M00135 | V\$OCT1_01 | 3       | 11917 | (-) | NNNNWTATGCAAATNTNNN   | TGCTAATTTCAAAATTTT      |
|        |            | 0.77693 |       |     |                       |                         |
| M00136 | V\$OCT1_02 | 6       | 11918 | (+) | NNGAATATKCANNNN       | GCTAATTTTCAAAAT         |
|        |            | 0.87514 |       |     |                       |                         |
| M00161 | V\$OCT1_05 | 5       | 11919 | (+) | MKNATTTGCATAYY        | CTAATTTTCAAAAT          |
|        |            | 0.80156 |       |     |                       |                         |
| M00162 | V\$OCT1_06 | 2       | 11919 | (+) | CWNAWTKWSATRYN        | CTAATTTTCAAAAT          |
|        |            | 0.82696 |       |     |                       |                         |
| M00195 | V\$OCT1_Q6 | 5       | 11919 | (-) | NNNNATGCAAATNAN       | CTAATTTTCAAAATT         |
|        |            | 0.80820 |       |     |                       |                         |
| M00162 | V\$OCT1_06 | 3       | 11920 | (-) | CWNAWTKWSATRYN        | TAATTTTCAAAATT          |
|        |            | 0.80039 |       |     |                       |                         |
| M00162 | V\$OCT1_06 | 1       | 11921 | (-) | CWNAWTKWSATRYN        | AATTTTCAAAATTT          |
|        |            | 0.80064 |       |     |                       |                         |
| M00135 | V\$OCT1_01 | 9       | 11947 | (+) | NNNNWTATGCAAATNTNNN   | CAGTTTATACTAATCTTCA     |
|        |            | 0.80029 |       |     |                       |                         |
| M00248 | V\$OCT1_07 | 7       | 11950 | (+) | TNTATGNTAATT          | TTTATACTAATC            |
|        |            | 0.82392 |       |     | NNNNNNNNWATGCAAATNNNW |                         |
| M00138 | V\$OCT1_04 | 3       | 11952 | (-) | NNW                   | TATACTAATCTTCATAGATGATA |
|        |            | 0.78695 |       |     |                       |                         |
| M00136 | V\$OCT1_02 | 2       | 11955 | (+) | NNGAATATKCANNNN       | ACTAATCTTCATAGA         |
|        |            | 0.80156 |       |     |                       |                         |
| M00162 | V\$OCT1_06 | 2       | 11956 | (+) | CWNAWTKWSATRYN        | CTAATCTTCATAGA          |
|        |            | 0.82123 |       |     |                       |                         |
| M00195 | V\$OCT1_Q6 | 4       | 11956 | (-) | NNNNATGCAAATNAN       | CTAATCTTCATAGAT         |
|        |            | 0.79966 |       |     |                       |                         |
| M00248 | V\$OCT1_07 | 1       | 11958 | (-) | TNTATGNTAATT          | AATCTTCATAGA            |
|        |            | 0.83909 |       |     |                       |                         |
| M00248 | V\$OCT1_07 | 3       | 11977 | (+) | TNTATGNTAATT          | TTCTTGGTAATT            |
|        |            | 0.88463 |       |     |                       |                         |
| M00137 | V\$OCT1_03 | 1       | 11980 | (+) | NNNRTAATNANNN         | TTGGTAATTGTAA           |
|        |            | 0.81875 |       |     |                       |                         |
| M00162 | V\$OCT1_06 |         | 11983 | (+) | CWNAWTKWSATRYN        | GTAATTGTAAAATG          |
|        |            | 0.82148 |       |     |                       |                         |
| M00162 | V\$OCT1_06 | 4       | 11989 | (+) | CWNAWTKWSATRYN        | GTAAAATGAATGTG          |
|        |            | 0.82148 |       |     |                       |                         |
| M00162 | V\$OCT1_06 | 4       | 11991 | (-) | CWNAWTKWSATRYN        | AAAATGAATGTGTT          |
|        |            | 0.83945 |       |     |                       |                         |
| M00162 | V\$OCT1_06 | 3       | 11994 | (+) | CWNAWTKWSATRYN        | ATGAATGTGTTACA          |

|        |            |         |       |     |                      |                         |  |
|--------|------------|---------|-------|-----|----------------------|-------------------------|--|
|        |            | 0.82656 |       |     |                      |                         |  |
| M00162 | V\$OCT1_06 | 2       | 12014 | (-) | CWNAWTKWSATRYN       | GATATCTAGGTAAC          |  |
|        |            | 0.86092 |       |     |                      |                         |  |
| M00137 | V\$OCT1_03 | 5       | 12043 | (-) | NNNRTAATNANNN        | TTCTATTTAGGAA           |  |
|        |            | 0.84765 |       |     |                      |                         |  |
| M00162 | V\$OCT1_06 | 6       | 12065 | (-) | CWNAWTKWSATRYN       | AGTATGAAAGAGGG          |  |
|        |            | 0.83437 |       |     |                      |                         |  |
| M00162 | V\$OCT1_06 | 5       | 12089 | (+) | CWNAWTKWSATRYN       | CACCAGGTAATATT          |  |
|        |            | 0.85262 |       |     |                      |                         |  |
| M00137 | V\$OCT1_03 | 7       | 12092 | (+) | NNNRTAATNANNN        | CAGGTAATATTTT           |  |
|        |            | 0.79987 |       |     | NNNNNNNWATGCAAATNNNW |                         |  |
| M00138 | V\$OCT1_04 | 5       | 12095 | (+) | NNW                  | GTAATATTTTGCTAAATGAATTA |  |
|        |            | 0.74227 |       |     |                      |                         |  |
| M00135 | V\$OCT1_01 | 4       | 12097 | (+) | NNNNWTATGCAAATNTNNN  | AATATTTTGCTAAATGAAT     |  |
|        |            | 0.87343 |       |     |                      |                         |  |
| M00162 | V\$OCT1_06 | 7       | 12106 | (+) | CWNAWTKWSATRYN       | CTAAATGAATTACA          |  |
|        |            | 0.80820 |       |     |                      |                         |  |
| M00162 | V\$OCT1_06 | 3       | 12107 | (-) | CWNAWTKWSATRYN       | TAAATGAATTACAT          |  |
|        |            | 0.76020 |       |     |                      |                         |  |
| M00135 | V\$OCT1_01 | 6       | 12108 | (-) | NNNNWTATGCAAATNTNNN  | AAATGAATTACATAATGAT     |  |
|        |            | 0.86835 |       |     |                      |                         |  |
| M00162 | V\$OCT1_06 | 9       | 12110 | (+) | CWNAWTKWSATRYN       | ATGAATTACATAAT          |  |
| M00195 | V\$OCT1_Q6 | 0.8256  | 12110 | (-) | NNNNATGCAAATNAN      | ATGAATTACATAATG         |  |
|        |            | 0.92460 |       |     |                      |                         |  |
| M00162 | V\$OCT1_06 | 9       | 12111 | (-) | CWNAWTKWSATRYN       | TGAATTACATAATG          |  |
|        |            | 0.78451 |       |     |                      |                         |  |
| M00136 | V\$OCT1_02 | 5       | 12112 | (-) | NNGAATATKCANNNN      | GAATTACATAATGAT         |  |
|        |            | 0.77165 |       |     |                      |                         |  |
| M00135 | V\$OCT1_01 | 2       | 12116 | (+) | NNNNWTATGCAAATNTNNN  | TACATAATGATAATATGTT     |  |
|        |            | 0.94508 |       |     |                      |                         |  |
| M00137 | V\$OCT1_03 | 1       | 12116 | (+) | NNNRTAATNANNN        | TACATAATGATAA           |  |
|        |            | 0.80976 |       |     |                      |                         |  |
| M00162 | V\$OCT1_06 | 6       | 12119 | (-) | CWNAWTKWSATRYN       | ATAATGATAATATG          |  |
|        |            | 0.85894 |       |     |                      |                         |  |
| M00137 | V\$OCT1_03 | 9       | 12122 | (+) | NNNRTAATNANNN        | ATGATAATATGTT           |  |
|        |            | 0.79255 |       |     | NNNNNNNWATGCAAATNNNW |                         |  |
| M00138 | V\$OCT1_04 | 5       | 12133 | (-) | NNW                  | TTGCAAAGTTTAAATATGTTTGC |  |
|        |            | 0.84218 |       |     |                      |                         |  |
| M00162 | V\$OCT1_06 | 7       | 12137 | (+) | CWNAWTKWSATRYN       | AAAGTTTAAATATG          |  |
| M00162 | V\$OCT1_06 |         | 12137 | (-) | CWNAWTKWSATRYN       | AAAGTTTAAATATG          |  |
|        |            | 0.86054 |       |     |                      |                         |  |



|        |            |         |       |     |                       |                         |  |
|--------|------------|---------|-------|-----|-----------------------|-------------------------|--|
|        |            | 7       |       |     |                       |                         |  |
|        |            | 0.77828 |       |     |                       |                         |  |
| M00136 | V\$OCT1_02 | 9       | 12139 | (-) | NNGAATATKCANNNN       | AGTTTAAATATGTTT         |  |
|        |            | 0.82747 |       |     | NNNNNNNNWATGCAAATNNNW |                         |  |
| M00138 | V\$OCT1_04 | 8       | 12149 | (-) | NNW                   | TGTTTGCTTTTAAATAGCTTCAC |  |
|        |            | 0.86015 |       |     |                       |                         |  |
| M00162 | V\$OCT1_06 | 6       | 12164 | (-) | CWNAWTKWSATRYN        | AGCTTCACAATTTT          |  |
|        |            | 0.79673 |       |     | NNNNNNNNWATGCAAATNNNW |                         |  |
| M00138 | V\$OCT1_04 | 8       | 12226 | (-) | NNW                   | TGAAACAATTTGTAGTAATCAAT |  |
|        |            | 0.87317 |       |     |                       |                         |  |
| M00137 | V\$OCT1_03 | 3       | 12237 | (+) | NNNRTAATNANNN         | GTAGTAATCAATC           |  |
|        |            | 0.79485 |       |     | NNNNNNNNWATGCAAATNNNW |                         |  |
| M00138 | V\$OCT1_04 | 6       | 12259 | (-) | NNW                   | AGAACTATTTGTCATTCTTCTT  |  |
|        |            | 0.92968 |       |     |                       |                         |  |
| M00162 | V\$OCT1_06 | 8       | 12263 | (+) | CWNAWTKWSATRYN        | CTATTGTCATTCT           |  |
|        |            | 0.86289 |       |     |                       |                         |  |
| M00162 | V\$OCT1_06 | 1       | 12264 | (-) | CWNAWTKWSATRYN        | TATTTGTCATTCTT          |  |
|        |            | 0.80078 |       |     |                       |                         |  |
| M00162 | V\$OCT1_06 | 1       | 12326 | (+) | CWNAWTKWSATRYN        | ACCTTTGTAATTCT          |  |
| M00162 | V\$OCT1_06 | 0.85    | 12343 | (+) | CWNAWTKWSATRYN        | CACTATGAAGTGTT          |  |
|        |            | 0.80326 |       |     |                       |                         |  |
| M00248 | V\$OCT1_07 | 5       | 12349 | (+) | TNTATGNTAATT          | GAAGTGTTAATT            |  |
|        |            | 0.86302 |       |     | NNNNNNNNWATGCAAATNNNW |                         |  |
| M00138 | V\$OCT1_04 | 8       | 12351 | (-) | NNW                   | AGTGTTAATTTCCATGGTTATGT |  |
|        |            | 0.74837 |       |     |                       |                         |  |
| M00135 | V\$OCT1_01 | 8       | 12353 | (-) | NNNNWTATGCAAATNTNNN   | TGTTAATTTCCATGGTTAT     |  |
|        |            | 0.83842 |       |     |                       |                         |  |
| M00195 | V\$OCT1_Q6 | 8       | 12355 | (-) | NNNNATGCAAATNAN       | TTAATTTCCATGGTT         |  |
|        |            | 0.78251 |       |     | NNNNNNNNWATGCAAATNNNW |                         |  |
| M00138 | V\$OCT1_04 | 8       | 12356 | (+) | NNW                   | TAATTTCCATGGTTATGTTAATT |  |
|        |            | 0.89866 |       |     |                       |                         |  |
| M00248 | V\$OCT1_07 | 4       | 12357 | (-) | TNTATGNTAATT          | AATTTCCATGGT            |  |
|        |            | 0.80698 |       |     | NNNNNNNNWATGCAAATNNNW |                         |  |
| M00138 | V\$OCT1_04 | 5       | 12362 | (+) | NNW                   | CCATGGTTATGTTAATTTCCATG |  |
|        |            | 0.87981 |       |     |                       |                         |  |
| M00135 | V\$OCT1_01 | 7       | 12364 | (+) | NNNNWTATGCAAATNTNNN   | ATGGTTATGTTAATTTCCA     |  |
|        |            | 0.80585 |       |     |                       |                         |  |
| M00162 | V\$OCT1_06 | 9       | 12367 | (+) | CWNAWTKWSATRYN        | GTTATGTTAATTTT          |  |
|        |            | 0.95526 |       |     |                       |                         |  |
| M00248 | V\$OCT1_07 | 8       | 12367 | (+) | TNTATGNTAATT          | GTTATGTTAATT            |  |

|        |            |              |       |     |                              |                          |
|--------|------------|--------------|-------|-----|------------------------------|--------------------------|
| M00138 | V\$OCT1_04 | 0.86595<br>6 | 12369 | (-) | NNNNNNNNWATGCAAATNNNW<br>NNW | TATGTAAATTTCCATGGTTATGT  |
| M00135 | V\$OCT1_01 | 0.74837<br>8 | 12371 | (-) | NNNNWTATGCAAATNTNNN          | TGTAAATTTCCATGGTTAT      |
| M00195 | V\$OCT1_Q6 | 0.83842<br>8 | 12373 | (-) | NNNNATGCAAATNAN              | TTAATTTCCATGGTT          |
| M00138 | V\$OCT1_04 | 0.78251<br>8 | 12374 | (+) | NNNNNNNNWATGCAAATNNNW<br>NNW | TAATTTCCATGGTTATGTAAATT  |
| M00248 | V\$OCT1_07 | 0.89866<br>4 | 12375 | (-) | TNTATGNTAATT                 | AATTTCCATGGT             |
| M00138 | V\$OCT1_04 | 0.84420<br>7 | 12380 | (+) | NNNNNNNNWATGCAAATNNNW<br>NNW | CCATGGTTATGTAAATTTCTCTT  |
| M00135 | V\$OCT1_01 | 0.87275<br>8 | 12382 | (+) | NNNNWTATGCAAATNTNNN          | ATGGTTATGTAAATTTCTC      |
| M00162 | V\$OCT1_06 | 0.80585<br>9 | 12385 | (+) | CWNAWTKWSATRYN               | GTTATGTAAATTTTC          |
| M00248 | V\$OCT1_07 | 0.95526<br>8 | 12385 | (+) | TNTATGNTAATT                 | GTTATGTAAATT             |
| M00138 | V\$OCT1_04 | 0.83898<br>8 | 12412 | (-) | NNNNNNNNWATGCAAATNNNW<br>NNW | TCCTAAATTTTATATCTTTATGT  |
| M00162 | V\$OCT1_06 | 0.88671<br>9 | 12414 | (+) | CWNAWTKWSATRYN               | CTAAATTTTATATC           |
| M00195 | V\$OCT1_Q6 | 0.79830<br>8 | 12414 | (-) | NNNNATGCAAATNAN              | CTAAATTTTATATCT          |
| M00162 | V\$OCT1_06 | 0.80859<br>4 | 12415 | (-) | CWNAWTKWSATRYN               | TAAATTTTATATCT           |
| M00138 | V\$OCT1_04 | 0.78711<br>8 | 12418 | (-) | NNNNNNNNWATGCAAATNNNW<br>NNW | ATTTTATATCTTTATGTCCATGA  |
| M00137 | V\$OCT1_03 | 0.89529<br>8 | 12423 | (-) | NNNRTAATNANNN                | ATATCTTTATGTC            |
| M00162 | V\$OCT1_06 | 0.88125<br>7 | 12436 | (+) | CWNAWTKWSATRYN               | CATGATTGATTCT            |
| M00162 | V\$OCT1_06 | 0.88554<br>7 | 12444 | (+) | CWNAWTKWSATRYN               | GATTCTTAAATTCA           |
| M00138 | V\$OCT1_04 | 0.80531<br>2 | 12450 | (+) | NNNNNNNNWATGCAAATNNNW<br>NNW | TAAATTC AATTTATATTTAGGAA |
| M00162 | V\$OCT1_06 | 0.90390<br>6 | 12450 | (-) | CWNAWTKWSATRYN               | TAAATTC AATTTAT          |
| M00248 | V\$OCT1_07 | 0.81344<br>1 | 12457 | (-) | TNTATGNTAATT                 | AATTTATATTTA             |
| M00137 | V\$OCT1_03 | 0.85104      | 12460 | (-) | NNNRTAATNANNN                | TTATATTTAGGAA            |

|        |            |         |       |     |                |                 |                      |
|--------|------------|---------|-------|-----|----------------|-----------------|----------------------|
|        |            | 0.80039 |       |     |                |                 |                      |
| M00162 | V\$OCT1_06 | 1       | 12461 | (-) | CWNAWTKWSATRYN | TATATTAGGAAAT   |                      |
|        |            | 0.80820 |       |     |                |                 |                      |
| M00162 | V\$OCT1_06 | 3       | 12464 | (+) | CWNAWTKWSATRYN | ATTAGGAAATTCA   |                      |
|        |            | 0.80029 |       |     | NNNNNNN        | WATGCAAATNNNW   |                      |
| M00138 | V\$OCT1_04 | 3       | 12465 | (+) | NNW            | TTTAGGAAATTCAA  | ACTCATAAT            |
|        |            | 0.81266 |       |     |                |                 |                      |
| M00136 | V\$OCT1_02 | 9       | 12467 | (+) | NNGAATATKCANN  | TAGGAAATTCAA    | ACT                  |
|        |            | 0.79548 |       |     | NNNNNNN        | WATGCAAATNNNW   |                      |
| M00138 | V\$OCT1_04 | 3       | 12471 | (+) | NNW            | AAATTCAA        | ACTCATAATTATGCT      |
|        |            | 0.92374 |       |     |                |                 |                      |
| M00137 | V\$OCT1_03 | 6       | 12480 | (+) | NNNR           | AATNANNN        | CTCATAATTATGC        |
|        |            | 0.93046 |       |     |                |                 |                      |
| M00137 | V\$OCT1_03 | 2       | 12481 | (-) | NNNR           | AATNANNN        | TCATAATTATGCT        |
|        |            | 0.75543 |       |     |                |                 |                      |
| M00135 | V\$OCT1_01 | 7       | 12483 | (+) | NNNN           | WTATGCAAATNTNN  | ATAATTATGCTCTTTCAAG  |
|        |            | 0.81212 |       |     |                |                 |                      |
| M00136 | V\$OCT1_02 | 8       | 12483 | (+) | NNGAATATKCANN  | ATAATTATGCTCTTT |                      |
|        |            | 0.81210 |       |     |                |                 |                      |
| M00162 | V\$OCT1_06 | 9       | 12500 | (-) | CWNAWTKWSATRYN | AGCAAGCCATTG    |                      |
|        |            | 0.76154 |       |     |                |                 |                      |
| M00135 | V\$OCT1_01 | 1       | 12503 | (-) | NNNN           | WTATGCAAATNTNN  | AAGCCATTGGAGATTAT    |
|        |            | 0.84726 |       |     |                |                 |                      |
| M00162 | V\$OCT1_06 | 6       | 12507 | (+) | CWNAWTKWSATRYN | CATTGGAGATT     |                      |
|        |            | 0.79109 |       |     | NNNNNNN        | WATGCAAATNNNW   |                      |
| M00138 | V\$OCT1_04 | 2       | 12511 | (-) | NNW            | TGGAGATT        | TATTAATTCTAATTG      |
|        |            | 0.80039 |       |     |                |                 |                      |
| M00162 | V\$OCT1_06 | 1       | 12515 | (+) | CWNAWTKWSATRYN | GATT            | TATTAATTCT           |
|        |            | 0.82768 |       |     | NNNNNNN        | WATGCAAATNNNW   |                      |
| M00138 | V\$OCT1_04 | 7       | 12516 | (+) | NNW            | ATT             | TATTAATTCTAATTGAAACC |
|        |            | 0.74475 |       |     |                |                 |                      |
| M00135 | V\$OCT1_01 | 4       | 12518 | (+) | NNNN           | WTATGCAAATNTNN  | TTATTAATTCTAATTGAAA  |
| M00248 | V\$OCT1_07 |         | 12521 | (+) | TNTATGNTAATT   | TTAATTCTAATT    |                      |
|        |            | 0.79548 |       |     | NNNNNNN        | WATGCAAATNNNW   |                      |
| M00138 | V\$OCT1_04 | 3       | 12522 | (+) | NNW            | TAATTCTAATTGAA  | ACCTTTAGA            |
|        |            | 0.81601 |       |     |                |                 |                      |
| M00162 | V\$OCT1_06 | 6       | 12560 | (+) | CWNAWTKWSATRYN | AGATAGTAAATGTT  |                      |
|        |            | 0.80820 |       |     |                |                 |                      |
| M00162 | V\$OCT1_06 | 3       | 12561 | (-) | CWNAWTKWSATRYN | GATAGTAAATGTTT  |                      |

|        |            |              |       |     |                              |                         |
|--------|------------|--------------|-------|-----|------------------------------|-------------------------|
| M00138 | V\$OCT1_04 | 0.80928<br>5 | 12619 | (+) | NNNNNNNNWATGCAAATNNNW<br>NNW | GTGTTTTATCTATATAATAGAA  |
| M00138 | V\$OCT1_04 | 0.83187      | 12620 | (-) | NNNNNNNNWATGCAAATNNNW<br>NNW | TGTTTTATCTATATAATAGAAA  |
| M00162 | V\$OCT1_06 | 0.87812<br>5 | 12655 | (+) | CWNAWTKWSATRYN               | CTGCCTTGCATTCC          |
| M00195 | V\$OCT1_Q6 | 0.8256       | 12655 | (-) | NNNNATGCAAATNAN              | CTGCCTTGCATTCCA         |
| M00162 | V\$OCT1_06 | 0.91171<br>9 | 12661 | (-) | CWNAWTKWSATRYN               | TGCATTCCATTGAT          |
| M00162 | V\$OCT1_06 | 0.83945<br>3 | 12723 | (+) | CWNAWTKWSATRYN               | GATACTGTGAAATA          |
| M00162 | V\$OCT1_06 | 0.84179<br>7 | 12732 | (+) | CWNAWTKWSATRYN               | AAATATGTGCTGCT          |
| M00162 | V\$OCT1_06 | 0.81914<br>1 | 12743 | (-) | CWNAWTKWSATRYN               | GCTATTACAATTCT          |
| M00138 | V\$OCT1_04 | 0.78189      | 12766 | (+) | NNNNNNNNWATGCAAATNNNW<br>NNW | CAAAAGCTATGCCAATTCAATC  |
| M00135 | V\$OCT1_01 | 0.81953<br>5 | 12768 | (+) | NNNNWTATGCAAATNTNNN          | AAAGCTATGCCAATTCAA      |
| M00195 | V\$OCT1_Q6 | 0.82833      | 12770 | (+) | NNNNATGCAAATNAN              | AGCTATGCCAATTTC         |
| M00162 | V\$OCT1_06 | 0.84765<br>6 | 12771 | (-) | CWNAWTKWSATRYN               | GCTATGCCAATTTC          |
| M00248 | V\$OCT1_07 | 0.87470<br>9 | 12771 | (+) | TNTATGNTAATT                 | GCTATGCCAATT            |
| M00162 | V\$OCT1_06 | 0.81406<br>2 | 12777 | (-) | CWNAWTKWSATRYN               | CCAATTCAATCAC           |
| M00162 | V\$OCT1_06 | 0.84765<br>6 | 12789 | (+) | CWNAWTKWSATRYN               | ACTACTGTCATTTA          |
| M00136 | V\$OCT1_02 | 0.77016<br>8 | 12819 | (-) | NNGAATATKCANNNN              | TTGTTGAGTATGTTT         |
| M00138 | V\$OCT1_04 | 0.78795<br>5 | 12822 | (-) | NNNNNNNNWATGCAAATNNNW<br>NNW | TTGAGTATGTTTCATATGTCTTA |
| M00162 | V\$OCT1_06 | 0.83437<br>5 | 12826 | (+) | CWNAWTKWSATRYN               | GTATGTTTCATATG          |
| M00136 | V\$OCT1_02 | 0.77016<br>8 | 12844 | (-) | NNGAATATKCANNNN              | AGAAGAAATATTATC         |
| M00135 | V\$OCT1_01 | 0.76592<br>9 | 12859 | (+) | NNNNWTATGCAAATNTNNN          | TAGATAATGCAATTGGCAA     |
| M00136 | V\$OCT1_02 | 0.80102<br>9 | 12859 | (+) | NNGAATATKCANNNN              | TAGATAATGCAATTG         |

|        |            |                  |       |                     |                              |                         |
|--------|------------|------------------|-------|---------------------|------------------------------|-------------------------|
| M00195 | V\$OCT1_Q6 | 0.81413<br>8     | 12861 | (+)                 | NNNNATGCAAATNAN              | GATAATGCAATTGGC         |
| M00138 | V\$OCT1_04 | 0.80280<br>2     | 12863 | (-)                 | NNNNNNNNWATGCAAATNNNW<br>NNW | TAATGCAATTGGCAAAATTATTA |
| M00135 | V\$OCT1_01 | 0.78138<br>1     | 12865 | (-)                 | NNNNWTATGCAAATNTNNN          | ATGCAATTGGCAAAATTAT     |
| M00135 | V\$OCT1_01 | 0.73979<br>4     | 12866 | (+)                 | NNNNWTATGCAAATNTNNN          | TGCAATTGGCAAAATTATT     |
| M00137 | V\$OCT1_03 | 0.84037<br>9     | 12874 | (-)                 | NNNRTAATNANNN                | GCAAAATTATTAG           |
| M00136 | V\$OCT1_02 | 0.82539<br>3     | 12885 | (-)                 | NNGAATATKCANNNN              | AGTGTGAATTTCCAG         |
| M00138 | V\$OCT1_04 | 0.81367<br>6     | 12885 | (-)                 | NNNNNNNNWATGCAAATNNNW<br>NNW | AGTGTGAATTTCCAGATCTCTAA |
| M00135 | V\$OCT1_01 | 0.77375<br>12887 | (-)   | NNNNWTATGCAAATNTNNN | TGTGAATTTCCAGATCTCT          |                         |
| M00162 | V\$OCT1_06 | 0.80820<br>3     | 12889 | (-)                 | CWNAWTKWSATRYN               | TGAATTTCCAGATC          |
| M00248 | V\$OCT1_07 | 0.83612<br>5     | 12891 | (-)                 | TNTATGNTAATT                 | AATTTCCAGATC            |
| M00162 | V\$OCT1_06 | 0.82929<br>7     | 12900 | (+)                 | CWNAWTKWSATRYN               | ATCTCTAACATGCA          |
| M00138 | V\$OCT1_04 | 0.83207<br>9     | 12901 | (+)                 | NNNNNNNNWATGCAAATNNNW<br>NNW | TCTCTAACATGCAAAGCATTCA  |
| M00135 | V\$OCT1_01 | 0.75009<br>5     | 12903 | (+)                 | NNNNWTATGCAAATNTNNN          | TCTAACATGCAAAGCATTT     |
| M00136 | V\$OCT1_02 | 0.77016<br>8     | 12903 | (+)                 | NNGAATATKCANNNN              | TCTAACATGCAAAGC         |
| M00195 | V\$OCT1_Q6 | 0.89983<br>6     | 12905 | (+)                 | NNNNATGCAAATNAN              | TAACATGCAAAGCAT         |
| M00161 | V\$OCT1_05 | 0.93856<br>9     | 12906 | (-)                 | MKNATTTGCATAYY               | AACATGCAAAGCAT          |
| M00162 | V\$OCT1_06 | 0.89843<br>7     | 12906 | (-)                 | CWNAWTKWSATRYN               | AACATGCAAAGCAT          |
| M00162 | V\$OCT1_06 | 0.9375<br>12915  | (-)   | CWNAWTKWSATRYN      | AGCATTTCAAAAAG               |                         |
| M00162 | V\$OCT1_06 | 0.80039<br>1     | 12917 | (-)                 | CWNAWTKWSATRYN               | CATTTCAAAAAGTT          |
| M00162 | V\$OCT1_06 | 0.82929<br>7     | 12932 | (+)                 | CWNAWTKWSATRYN               | GCTTCTTACATTTT          |
| M00136 | V\$OCT1_02 | 0.79263<br>7     | 12934 | (-)                 | NNGAATATKCANNNN              | TTCTTACATTTTCTG         |

|        |            |              |       |     |                              |                          |
|--------|------------|--------------|-------|-----|------------------------------|--------------------------|
| M00162 | V\$OCT1_06 | 0.82109<br>4 | 12958 | (-) | CWNAWTKWSATRYN               | AGCCTTAAAAGATC           |
| M00162 | V\$OCT1_06 | 0.81367<br>2 | 12979 | (+) | CWNAWTKWSATRYN               | CTCTTTTCTTTCC            |
| M00162 | V\$OCT1_06 | 0.82656<br>2 | 13038 | (+) | CWNAWTKWSATRYN               | CTGTTGAGTTTTA            |
| M00162 | V\$OCT1_06 | 0.81601<br>6 | 13132 | (-) | CWNAWTKWSATRYN               | AGTATTTCTTAGTT           |
| M00162 | V\$OCT1_06 | 0.82109<br>4 | 13135 | (+) | CWNAWTKWSATRYN               | ATTTCTTAGTTGTT           |
| M00162 | V\$OCT1_06 | 0.80859<br>4 | 13218 | (-) | CWNAWTKWSATRYN               | GAAATGAAAGAACA           |
| M00162 | V\$OCT1_06 | 0.82656<br>2 | 13269 | (+) | CWNAWTKWSATRYN               | CAACTTTTAAGTTA           |
| M00162 | V\$OCT1_06 | 0.86054<br>7 | 13270 | (-) | CWNAWTKWSATRYN               | AACTTTTAAGTTAG           |
| M00138 | V\$OCT1_04 | 0.81514      | 13293 | (+) | NNNNNNNNWATGCAAATNNNW<br>NNW | AACCAACTATTCATATCATTCAA  |
| M00136 | V\$OCT1_02 | 0.79967<br>5 | 13295 | (+) | NNGAATATKCANNNN              | CCAACTATTCATATC          |
| M00162 | V\$OCT1_06 | 0.84726<br>6 | 13296 | (+) | CWNAWTKWSATRYN               | CAACTATTCATATC           |
| M00162 | V\$OCT1_06 | 0.83437<br>5 | 13301 | (+) | CWNAWTKWSATRYN               | ATTCATATCATTCA           |
| M00138 | V\$OCT1_04 | 0.81325<br>8 | 13302 | (+) | NNNNNNNNWATGCAAATNNNW<br>NNW | TTCATATCATTCAAATTTGACTT  |
| M00135 | V\$OCT1_01 | 0.78500<br>6 | 13304 | (+) | NNNNWTATGCAAATNTNNN          | CATATCATTCAAATTTGAC      |
| M00136 | V\$OCT1_02 | 0.77152<br>1 | 13304 | (+) | NNGAATATKCANNNN              | CATATCATTCAAATT          |
| M00162 | V\$OCT1_06 | 0.81406<br>2 | 13307 | (+) | CWNAWTKWSATRYN               | ATCATTCAAATTTG           |
| M00162 | V\$OCT1_06 | 0.87382<br>8 | 13307 | (-) | CWNAWTKWSATRYN               | ATCATTCAAATTTG           |
| M00248 | V\$OCT1_07 | 0.83909<br>3 | 13307 | (+) | TNTATGNTAATT                 | ATCATTCAAATT             |
| M00138 | V\$OCT1_04 | 0.83207<br>9 | 13309 | (-) | NNNNNNNNWATGCAAATNNNW<br>NNW | CATTCAAATTTGACTTTTTTATTA |
| M00135 | V\$OCT1_01 | 0.74475<br>4 | 13311 | (-) | NNNNWTATGCAAATNTNNN          | TTCAAATTTGACTTTTTAT      |

|        |            |                  |       |                       |                              |                         |
|--------|------------|------------------|-------|-----------------------|------------------------------|-------------------------|
| M00162 | V\$OCT1_06 | 0.83984<br>4     | 13313 | (+)                   | CWNAWTKWSATRYN               | CAAATTTGACTTTT          |
| M00162 | V\$OCT1_06 | 0.82890<br>6     | 13314 | (+)                   | CWNAWTKWSATRYN               | AAATTTGACTTTTT          |
| M00138 | V\$OCT1_04 | 0.79966<br>5     | 13315 | (-)                   | NNNNNNNNWATGCAAATNNNW<br>NNW | AATTTGACTTTTTATTAATCTAT |
| M00162 | V\$OCT1_06 | 0.82656<br>2     | 13351 | (+)                   | CWNAWTKWSATRYN               | CTTCTTGAGTTTTC          |
| M00136 | V\$OCT1_02 | 0.79588<br>5     | 13352 | (-)                   | NNGAATATKCANNNN              | TTCTTGAGTTTTCAG         |
| M00162 | V\$OCT1_06 | 0.85546<br>9     | 13364 | (+)                   | CWNAWTKWSATRYN               | CAGTCTTAGATCTA          |
| M00138 | V\$OCT1_04 | 0.80238<br>4     | 13430 | (+)                   | NNNNNNNNWATGCAAATNNNW<br>NNW | TTTGTGAAATTAATATGAATCTA |
| M00138 | V\$OCT1_04 | 0.80782<br>1     | 13431 | (-)                   | NNNNNNNNWATGCAAATNNNW<br>NNW | TTGTGAAATTAATATGAATCTAT |
| M00162 | V\$OCT1_06 | 0.81367<br>2     | 13433 | (+)                   | CWNAWTKWSATRYN               | GTGAAATTAATATG          |
| M00138 | V\$OCT1_04 | 0.78272<br>7     | 13436 | (+)                   | NNNNNNNNWATGCAAATNNNW<br>NNW | AAATTAATATGAATCTATTGATT |
| M00248 | V\$OCT1_07 | 0.83739<br>7     | 13437 | (-)                   | TNTATGNTAATT                 | AATTAATATGAA            |
| M00136 | V\$OCT1_02 | 0.82431<br>13438 | (+)   | NNGAATATKCANNNN       | ATTAATATGAATCTA              |                         |
| M00162 | V\$OCT1_06 | 0.82890<br>6     | 13445 | (-)                   | CWNAWTKWSATRYN               | TGAATCTATTGATT          |
| M00162 | V\$OCT1_06 | 0.81328<br>1     | 13447 | (+)                   | CWNAWTKWSATRYN               | AATCTATTGATTTA          |
| M00135 | V\$OCT1_01 | 0.73445<br>2     | 13468 | (-)                   | NNNNWTATGCAAATNTNNN          | CTAAAACTCACATATCTTG     |
| M00162 | V\$OCT1_06 | 0.85546<br>9     | 13470 | (+)                   | CWNAWTKWSATRYN               | AAAACTCACATATC          |
| M00162 | V\$OCT1_06 | 0.80039<br>1     | 13471 | (-)                   | CWNAWTKWSATRYN               | AAACTCACATATCT          |
| M00138 | V\$OCT1_04 | 0.83082<br>4     | 13482 | (-)                   | NNNNNNNNWATGCAAATNNNW<br>NNW | TCTTGAGTTTTGCAGTGTTTTTT |
| M00162 | V\$OCT1_06 | 0.82929<br>7     | 13513 | (+)                   | CWNAWTKWSATRYN               | CAGTTTTAAAGGTG          |
| M00162 | V\$OCT1_06 | 0.80859<br>4     | 13526 | (+)                   | CWNAWTKWSATRYN               | GGTAACTGCATTGCG         |
| M00138 | V\$OCT1_04 | 0.79862<br>13563 | (-)   | NNNNNNNNWATGCAAATNNNW | TGGTTGAACTTACATATAGTATG      |                         |

NNW

|        |            |         |       |     |                       |                         |  |
|--------|------------|---------|-------|-----|-----------------------|-------------------------|--|
|        |            | 0.79587 |       |     |                       |                         |  |
| M00135 | V\$OCT1_01 | 9       | 13565 | (-) | NNNNWTATGCAAATNTNNN   | GTTGAACTTACATATAGTA     |  |
|        |            | 0.86835 |       |     |                       |                         |  |
| M00162 | V\$OCT1_06 | 9       | 13567 | (+) | CWNAWTKWSATRYN        | TGAACTTACATATA          |  |
|        |            | 0.81367 |       |     |                       |                         |  |
| M00162 | V\$OCT1_06 | 2       | 13568 | (-) | CWNAWTKWSATRYN        | GAACTTACATATAG          |  |
|        |            | 0.86644 |       |     |                       |                         |  |
| M00248 | V\$OCT1_07 | 1       | 13569 | (-) | TNTATGNTAATT          | AACTTACATATA            |  |
|        |            | 0.86804 |       |     | NNNNNNNNWATGCAAATNNNW |                         |  |
| M00138 | V\$OCT1_04 | 7       | 13575 | (+) | NNW                   | CATATAGTATGCTAATTTAAAAA |  |
|        |            | 0.90614 |       |     |                       |                         |  |
| M00135 | V\$OCT1_01 | 3       | 13577 | (+) | NNNNWTATGCAAATNTNNN   | TATAGTATGCTAATTTAAA     |  |
|        |            | 0.77801 |       |     |                       |                         |  |
| M00136 | V\$OCT1_02 | 8       | 13577 | (+) | NNGAATATKCANNNN       | TATAGTATGCTAATT         |  |
|        |            | 0.80429 |       |     |                       |                         |  |
| M00162 | V\$OCT1_06 | 7       | 13580 | (-) | CWNAWTKWSATRYN        | AGTATGCTAATTTA          |  |
|        |            | 0.98070 |       |     |                       |                         |  |
| M00248 | V\$OCT1_07 | 8       | 13580 | (+) | TNTATGNTAATT          | AGTATGCTAATT            |  |
|        |            | 0.80071 |       |     | NNNNNNNNWATGCAAATNNNW |                         |  |
| M00138 | V\$OCT1_04 | 1       | 13581 | (+) | NNW                   | GTATGCTAATTTAAAAAAGAAAC |  |
|        |            | 0.82695 |       |     |                       |                         |  |
| M00162 | V\$OCT1_06 | 3       | 13586 | (-) | CWNAWTKWSATRYN        | CTAATTTAAAAAAG          |  |
|        |            | 0.86790 |       |     |                       |                         |  |
| M00195 | V\$OCT1_Q6 | 4       | 13601 | (+) | NNNNATGCAAATNAN       | AACCGTGCAAAGAAG         |  |
|        |            | 0.78105 |       |     | NNNNNNNNWATGCAAATNNNW |                         |  |
| M00138 | V\$OCT1_04 | 4       | 13616 | (-) | NNW                   | ACCATGGAGTTTATAAATATGA  |  |
|        |            | 0.80907 |       |     | NNNNNNNNWATGCAAATNNNW |                         |  |
| M00138 | V\$OCT1_04 | 6       | 13620 | (-) | NNW                   | TGGAGTTTATAAATATGAATCT  |  |
|        |            | 0.80039 |       |     |                       |                         |  |
| M00162 | V\$OCT1_06 | 1       | 13624 | (+) | CWNAWTKWSATRYN        | GTTTATAAATATG           |  |
|        |            | 0.80806 |       |     |                       |                         |  |
| M00136 | V\$OCT1_02 | 7       | 13626 | (-) | NNGAATATKCANNNN       | TTTATAAATATGAAT         |  |
|        |            | 0.87119 |       |     |                       |                         |  |
| M00137 | V\$OCT1_03 | 7       | 13626 | (+) | NNNRTAATNANNN         | TTTATAAATATGA           |  |
|        |            | 0.81221 |       |     | NNNNNNNNWATGCAAATNNNW |                         |  |
| M00138 | V\$OCT1_04 | 2       | 13626 | (-) | NNW                   | TTTATAAATATGAATCTGATAAG |  |
|        |            | 0.81618 |       |     | NNNNNNNNWATGCAAATNNNW |                         |  |
| M00138 | V\$OCT1_04 | 6       | 13627 | (+) | NNW                   | TTATAAATATGAATCTGATAAGG |  |
|        |            |         |       |     |                       |                         |  |
| M00136 | V\$OCT1_02 |         | 13629 | (+) | NNGAATATKCANNNN       | ATAAATATGAATCTG         |  |
|        |            | 0.78343 |       |     |                       |                         |  |



|        |            |         |       |     |                       |                         |  |
|--------|------------|---------|-------|-----|-----------------------|-------------------------|--|
|        |            | 3       |       |     |                       |                         |  |
|        |            | 0.80468 |       |     |                       |                         |  |
| M00162 | V\$OCT1_06 | 7       | 13630 | (-) | CWNAWTKWSATRYN        | TAAATATGAATCTG          |  |
|        |            | 0.79213 |       |     | NNNNNNNNWATGCAAATNNNW |                         |  |
| M00138 | V\$OCT1_04 | 7       | 13653 | (+) | NNW                   | TAAACAAGATTCAAAACATAGTA |  |
|        |            | 0.79263 |       |     |                       |                         |  |
| M00136 | V\$OCT1_02 | 7       | 13655 | (+) | NNGAATATKCANNNN       | AACAAGATTCAAAAC         |  |
|        |            | 0.80078 |       |     |                       |                         |  |
| M00162 | V\$OCT1_06 | 1       | 13658 | (-) | CWNAWTKWSATRYN        | AAGATTCAAAACAT          |  |
|        |            | 0.84588 |       |     | NNNNNNNNWATGCAAATNNNW |                         |  |
| M00138 | V\$OCT1_04 | 1       | 13684 | (+) | NNW                   | TCAATTTTATGATAATCATTCT  |  |
|        |            | 0.74322 |       |     |                       |                         |  |
| M00135 | V\$OCT1_01 | 8       | 13686 | (+) | NNNNWTATGCAAATNTNNN   | AATTTTATGATAATCATTC     |  |
|        |            | 0.80071 |       |     | NNNNNNNNWATGCAAATNNNW |                         |  |
| M00138 | V\$OCT1_04 | 1       | 13688 | (-) | NNW                   | TTTTATGATAATCATTCTTAAT  |  |
|        |            | 0.86269 |       |     |                       |                         |  |
| M00161 | V\$OCT1_05 | 3       | 13689 | (-) | MKNATTTGCATAYY        | TTTATGATAATCAT          |  |
|        |            | 0.81874 |       |     |                       |                         |  |
| M00248 | V\$OCT1_07 | 1       | 13689 | (+) | TNTATGNTAATT          | TTTATGATAATC            |  |
|        |            | 0.88344 |       |     |                       |                         |  |
| M00137 | V\$OCT1_03 | 5       | 13692 | (+) | NNNRTAATNANNN         | ATGATAATCATTC           |  |
|        |            | 0.82148 |       |     |                       |                         |  |
| M00162 | V\$OCT1_06 | 4       | 13700 | (+) | CWNAWTKWSATRYN        | CATTCTTAATGTG           |  |
|        |            | 0.86562 |       |     |                       |                         |  |
| M00162 | V\$OCT1_06 | 5       | 13705 | (+) | CWNAWTKWSATRYN        | CTTAATGTGAATCA          |  |
|        |            | 0.83187 |       |     |                       |                         |  |
| M00195 | V\$OCT1_Q6 | 8       | 13705 | (+) | NNNNATGCAAATNAN       | CTTAATGTGAATCAT         |  |
|        |            | 0.88671 |       |     |                       |                         |  |
| M00162 | V\$OCT1_06 | 9       | 13712 | (-) | CWNAWTKWSATRYN        | TGAATCATATTTTG          |  |
|        |            | 0.80429 |       |     |                       |                         |  |
| M00162 | V\$OCT1_06 | 7       | 13728 | (+) | CWNAWTKWSATRYN        | CTCAATTCTTCTA           |  |
|        |            | 0.82656 |       |     |                       |                         |  |
| M00162 | V\$OCT1_06 | 2       | 13780 | (-) | CWNAWTKWSATRYN        | GAAAAGACAATTAC          |  |
|        |            | 0.84709 |       |     |                       |                         |  |
| M00137 | V\$OCT1_03 | 6       | 13784 | (-) | NNNRTAATNANNN         | AGACAATTACGTA           |  |
|        |            | 0.86289 |       |     |                       |                         |  |
| M00162 | V\$OCT1_06 | 1       | 13785 | (+) | CWNAWTKWSATRYN        | GACAATTACGTACT          |  |
|        |            | 0.84765 |       |     |                       |                         |  |
| M00162 | V\$OCT1_06 | 6       | 13793 | (-) | CWNAWTKWSATRYN        | CGTACTTCATTGAG          |  |
|        |            | 0.84314 |       |     |                       |                         |  |
| M00137 | V\$OCT1_03 |         | 13806 | (+) | NNNRTAATNANNN         | GGTCTAAAGAGTA           |  |

|        |            |         |       |     |                       |                         |  |
|--------|------------|---------|-------|-----|-----------------------|-------------------------|--|
|        |            | 5       |       |     |                       |                         |  |
|        |            | 0.78816 |       |     | NNNNNNNNWATGCAAATNNNW |                         |  |
| M00138 | V\$OCT1_04 | 4       | 13824 | (-) | NNW                   | TCCTCACCTTTCATGTAATTTT  |  |
|        |            | 0.87617 |       |     |                       |                         |  |
| M00162 | V\$OCT1_06 | 2       | 13828 | (+) | CWNAWTKWSATRYN        | CACCTTTCATGTA           |  |
|        |            | 0.82148 |       |     |                       |                         |  |
| M00162 | V\$OCT1_06 | 4       | 13833 | (+) | CWNAWTKWSATRYN        | TTCCATGTAATTTT          |  |
|        |            | 0.89687 |       |     |                       |                         |  |
| M00162 | V\$OCT1_06 | 5       | 13834 | (-) | CWNAWTKWSATRYN        | TCCATGTAATTTTT          |  |
|        |            | 0.81725 |       |     |                       |                         |  |
| M00248 | V\$OCT1_07 | 7       | 13834 | (+) | TNTATGNTAATT          | TCCATGTAATTT            |  |
|        |            | 0.84907 |       |     |                       |                         |  |
| M00137 | V\$OCT1_03 | 2       | 13836 | (+) | NNNRTAATNANNN         | CATGTAATTTTTT           |  |
|        |            | 0.88502 |       |     |                       |                         |  |
| M00137 | V\$OCT1_03 | 6       | 13855 | (+) | NNNRTAATNANNN         | AGGGTAATCATTC           |  |
|        |            | 0.80112 |       |     | NNNNNNNNWATGCAAATNNNW |                         |  |
| M00138 | V\$OCT1_04 | 9       | 13856 | (+) | NNW                   | GGGTAATCATTCTAATCTTAATG |  |
|        |            | 0.75753 |       |     |                       |                         |  |
| M00135 | V\$OCT1_01 | 5       | 13858 | (+) | NNNNWTATGCAAATNTNNN   | GTAATCATTCTAATCTTAA     |  |
|        |            | 0.88344 |       |     |                       |                         |  |
| M00137 | V\$OCT1_03 | 5       | 13870 | (+) | NNNRTAATNANNN         | ATCTTAATGAGAG           |  |
|        |            | 0.88281 |       |     |                       |                         |  |
| M00162 | V\$OCT1_06 | 2       | 13928 | (-) | CWNAWTKWSATRYN        | TGAATCACAAAAC           |  |
|        |            | 0.81367 |       |     |                       |                         |  |
| M00162 | V\$OCT1_06 | 2       | 13966 | (+) | CWNAWTKWSATRYN        | GGAAGTGGCCTACT          |  |
|        |            | 0.83019 |       |     | NNNNNNNNWATGCAAATNNNW |                         |  |
| M00138 | V\$OCT1_04 | 7       | 13992 | (-) | NNW                   | TGAATTTATTTGATTTTTTATAT |  |
|        |            | 0.82148 |       |     |                       |                         |  |
| M00162 | V\$OCT1_06 | 4       | 13992 | (-) | CWNAWTKWSATRYN        | TGAATTTATTTGAT          |  |
|        |            | 0.90351 |       |     |                       |                         |  |
| M00162 | V\$OCT1_06 | 6       | 13995 | (+) | CWNAWTKWSATRYN        | ATTTATTTGATTTT          |  |
|        |            | 0.8555  |       |     | NNNNNNNNWATGCAAATNNNW |                         |  |
| M00138 | V\$OCT1_04 |         | 13998 | (-) | NNW                   | TATTTGATTTTTTATATTAATAC |  |
|        |            | 0.82538 |       |     | NNNNNNNNWATGCAAATNNNW |                         |  |
| M00138 | V\$OCT1_04 | 7       | 13999 | (+) | NNW                   | ATTTGATTTTTTATATTAATACT |  |
|        |            | 0.80384 |       |     | NNNNNNNNWATGCAAATNNNW |                         |  |
| M00138 | V\$OCT1_04 | 8       | 14000 | (-) | NNW                   | TTTGATTTTTTATATTAATACTA |  |
|        |            | 0.81911 |       |     | NNNNNNNNWATGCAAATNNNW |                         |  |
| M00138 | V\$OCT1_04 | 3       | 14003 | (+) | NNW                   | GATTTTTTATATTAATACTAATA |  |
|        |            | 0.85654 |       |     | NNNNNNNNWATGCAAATNNNW |                         |  |
| M00138 | V\$OCT1_04 |         | 14004 | (-) |                       | ATTTTTTATATTAATACTAATAA |  |

|        |            |         |       |     |                       |                         |
|--------|------------|---------|-------|-----|-----------------------|-------------------------|
|        |            | 5       |       |     | NNW                   |                         |
|        |            | 0.73998 |       |     |                       |                         |
| M00135 | V\$OCT1_01 | 5       | 14005 | (+) | NNNNWTATGCAAATNTNNN   | TTTTTATATTAATACTAA      |
|        |            | 0.79351 |       |     |                       |                         |
| M00248 | V\$OCT1_07 | 3       | 14008 | (+) | TNTATGNTAATT          | TTTATATTAATA            |
|        |            |         |       |     | NNNNNNNNWATGCAAATNNNW |                         |
| M00138 | V\$OCT1_04 | 0.83187 | 14009 | (+) | NNW                   | TTATATTAATACTAATAAGAGAA |
|        |            | 0.74055 |       |     |                       |                         |
| M00135 | V\$OCT1_01 | 7       | 14011 | (+) | NNNNWTATGCAAATNTNNN   | ATATTAATACTAATAAGAG     |
|        |            | 0.81877 |       |     |                       |                         |
| M00195 | V\$OCT1_Q6 | 7       | 14013 | (+) | NNNNATGCAAATNAN       | ATTAATACTAATAAG         |
|        |            | 0.85065 |       |     |                       |                         |
| M00137 | V\$OCT1_03 | 2       | 14017 | (+) | NNNRTAATNANNN         | ATACTAATAAGAG           |
|        |            | 0.89062 |       |     |                       |                         |
| M00162 | V\$OCT1_06 | 5       | 14030 | (-) | CWNAWTKWSATRYN        | AAAATCTCAGATAT          |
|        |            | 0.82148 |       |     |                       |                         |
| M00162 | V\$OCT1_06 | 4       | 14031 | (+) | CWNAWTKWSATRYN        | AAATCTCAGATATC          |
|        |            | 0.85273 |       |     |                       |                         |
| M00162 | V\$OCT1_06 | 4       | 14039 | (-) | CWNAWTKWSATRYN        | GATATCATATTTAT          |
|        |            | 0.79757 |       |     | NNNNNNNNWATGCAAATNNNW |                         |
| M00138 | V\$OCT1_04 | 4       | 14041 | (-) | NNW                   | TATCATATTTATTATAATCGTTA |
|        |            | 0.85341 |       |     |                       |                         |
| M00137 | V\$OCT1_03 | 8       | 14043 | (-) | NNNRTAATNANNN         | TCATATTTATTAT           |
|        |            | 0.81953 |       |     | NNNNNNNNWATGCAAATNNNW |                         |
| M00138 | V\$OCT1_04 | 2       | 14043 | (+) | NNW                   | TCATATTTATTATAATCGTTAGG |
|        |            | 0.87238 |       |     |                       |                         |
| M00137 | V\$OCT1_03 | 2       | 14046 | (-) | NNNRTAATNANNN         | TATTTATTATAAT           |
|        |            | 0.85381 |       |     |                       |                         |
| M00137 | V\$OCT1_03 | 3       | 14051 | (+) | NNNRTAATNANNN         | ATTATAATCGTTA           |
|        |            | 0.91914 |       |     |                       |                         |
| M00162 | V\$OCT1_06 | 1       | 14082 | (+) | CWNAWTKWSATRYN        | AAACTTGAAATGCT          |
|        |            | 0.83671 |       |     |                       |                         |
| M00162 | V\$OCT1_06 | 9       | 14083 | (-) | CWNAWTKWSATRYN        | AACTTGAAATGCTT          |
| M00162 | V\$OCT1_06 | 0.81875 | 14094 | (+) | CWNAWTKWSATRYN        | CTTCTTTGGTTTT           |
|        |            | 0.74151 |       |     |                       |                         |
| M00135 | V\$OCT1_01 | 1       | 14100 | (+) | NNNNWTATGCAAATNTNNN   | TTGGTTTTTCTAATTCCAT     |
|        |            | 0.80538 |       |     |                       |                         |
| M00248 | V\$OCT1_07 | 5       | 14103 | (+) | TNTATGNTAATT          | GTTTTTCTAATT            |
|        |            | 0.79245 |       |     |                       |                         |
| M00248 | V\$OCT1_07 | 3       | 14120 | (-) | TNTATGNTAATT          | AAAGAACATATA            |

|        |            |              |       |     |                              |                         |
|--------|------------|--------------|-------|-----|------------------------------|-------------------------|
| M00138 | V\$OCT1_04 | 0.78272<br>7 | 14125 | (-) | NNNNNNNNWATGCAAATNNNW<br>NNW | ACATATATTTTCCACCTGAATAT |
| M00138 | V\$OCT1_04 | 0.79464<br>7 | 14132 | (+) | NNNNNNNNWATGCAAATNNNW<br>NNW | TTTCCACCTGAATATATAAAGA  |
| M00136 | V\$OCT1_02 | 0.79236<br>6 | 14137 | (-) | NNGAATATKCANNNN              | CACCTGAATATATAA         |
| M00138 | V\$OCT1_04 | 0.79778<br>3 | 14138 | (+) | NNNNNNNNWATGCAAATNNNW<br>NNW | ACCTGAATATATAAAGAATTACA |
| M00138 | V\$OCT1_04 | 0.79151      | 14139 | (-) | NNNNNNNNWATGCAAATNNNW<br>NNW | CCTGAATATATAAAGAATTACAT |
| M00195 | V\$OCT1_Q6 | 0.84197<br>6 | 14142 | (+) | NNNNATGCAAATNAN              | GAATATATAAAGAAT         |
| M00162 | V\$OCT1_06 | 0.84726<br>6 | 14143 | (-) | CWNAWTKWSATRYN               | AATATATAAAGAAT          |
| M00137 | V\$OCT1_03 | 0.84156<br>5 | 14145 | (+) | NNNRTAATNANNN                | TATATAAAGAATT           |
| M00138 | V\$OCT1_04 | 0.78126<br>3 | 14147 | (-) | NNNNNNNNWATGCAAATNNNW<br>NNW | TATAAAGAATTACATTAATGCAC |
| M00162 | V\$OCT1_06 | 0.86328<br>1 | 14151 | (+) | CWNAWTKWSATRYN               | AAGAATTACATTAA          |
| M00162 | V\$OCT1_06 | 0.91679<br>7 | 14152 | (-) | CWNAWTKWSATRYN               | AGAATTACATTAAT          |
| M00248 | V\$OCT1_07 | 0.81513<br>7 | 14154 | (-) | TNTATGNTAATT                 | AATTACATTAAT            |
| M00162 | V\$OCT1_06 | 0.82656<br>2 | 14155 | (+) | CWNAWTKWSATRYN               | ATTACATTAATGCA          |
| M00162 | V\$OCT1_06 | 0.80078<br>1 | 14208 | (-) | CWNAWTKWSATRYN               | CCTATTCCAAAATT          |
| M00162 | V\$OCT1_06 | 0.81718<br>7 | 14215 | (+) | CWNAWTKWSATRYN               | CAAAATTTCAGAAA          |
| M00162 | V\$OCT1_06 | 0.82148<br>4 | 14216 | (-) | CWNAWTKWSATRYN               | AAAATTTCAGAAAA          |
| M00162 | V\$OCT1_06 | 0.84218<br>7 | 14225 | (-) | CWNAWTKWSATRYN               | GAAAAGAAATAATG          |
| M00137 | V\$OCT1_03 | 0.86132      | 14230 | (+) | NNNRTAATNANNN                | GAAATAATGGTTT           |
| M00137 | V\$OCT1_03 | 0.87712<br>4 | 14255 | (-) | NNNRTAATNANNN                | TTATAGTTACGAA           |
| M00137 | V\$OCT1_03 | 0.87356<br>8 | 14299 | (-) | NNNRTAATNANNN                | TTCTCTTTATTCT           |
| M00162 | V\$OCT1_06 | 0.87773      | 14307 | (+) | CWNAWTKWSATRYN               | ATTCTTGGCATTTC          |

|        |            |         |       |     |                       |                         |
|--------|------------|---------|-------|-----|-----------------------|-------------------------|
|        |            | 4       |       |     |                       |                         |
|        |            | 0.86244 |       |     |                       |                         |
| M00195 | V\$OCT1_Q6 | 5       | 14307 | (-) | NNNNATGCAAATNAN       | ATTCTTGGCATTCT          |
|        |            | 0.80859 |       |     |                       |                         |
| M00162 | V\$OCT1_06 | 4       | 14316 | (+) | CWNAWTKWSATRYN        | ATTTCTGAAATCCC          |
|        |            | 0.80078 |       |     |                       |                         |
| M00162 | V\$OCT1_06 | 1       | 14322 | (-) | CWNAWTKWSATRYN        | GAAATCCCTGTATT          |
|        |            | 0.80907 |       |     | NNNNNNNNWATGCAAATNNNW |                         |
| M00138 | V\$OCT1_04 | 6       | 14372 | (+) | NNW                   | TTGCCTTCATGAAAACTAACT   |
|        |            | 0.84726 |       |     |                       |                         |
| M00162 | V\$OCT1_06 | 6       | 14376 | (+) | CWNAWTKWSATRYN        | CTTCATGAAAACT           |
|        |            | 0.81890 |       |     | NNNNNNNNWATGCAAATNNNW |                         |
| M00138 | V\$OCT1_04 | 4       | 14398 | (+) | NNW                   | GAACAGAAAGGCAAAAATGACCT |
| M00135 | V\$OCT1_01 | 0.73388 | 14400 | (+) | NNNNWTATGCAAATNTNNN   | ACAGAAAGGCAAAAATGAC     |
|        |            | 0.82148 |       |     |                       |                         |
| M00162 | V\$OCT1_06 | 4       | 14403 | (-) | CWNAWTKWSATRYN        | GAAAGGCAAAAATG          |
|        |            | 0.86289 |       |     |                       |                         |
| M00162 | V\$OCT1_06 | 1       | 14410 | (+) | CWNAWTKWSATRYN        | AAAAATGACCTTCT          |
|        |            | 0.84218 |       |     |                       |                         |
| M00162 | V\$OCT1_06 | 7       | 14411 | (-) | CWNAWTKWSATRYN        | AAAATGACCTTCTC          |
|        |            | 0.77012 |       |     |                       |                         |
| M00135 | V\$OCT1_01 | 6       | 14421 | (+) | NNNNWTATGCAAATNTNNN   | TCTCTAATCCAAATGTCCA     |
|        |            | 0.81406 |       |     |                       |                         |
| M00162 | V\$OCT1_06 | 2       | 14424 | (-) | CWNAWTKWSATRYN        | CTAATCCAAATGTC          |
|        |            | 0.73120 |       |     |                       |                         |
| M00135 | V\$OCT1_01 | 9       | 14428 | (-) | NNNNWTATGCAAATNTNNN   | TCCAAATGTCCATGAGTTT     |
|        |            | 0.84765 |       |     |                       |                         |
| M00162 | V\$OCT1_06 | 6       | 14430 | (-) | CWNAWTKWSATRYN        | CAAATGTCCATGAG          |
|        |            | 0.78523 |       |     | NNNNNNNNWATGCAAATNNNW |                         |
| M00138 | V\$OCT1_04 | 6       | 14437 | (+) | NNW                   | CCATGAGTTTATAAATTATATAA |
|        |            | 0.80676 |       |     |                       |                         |
| M00195 | V\$OCT1_Q6 | 9       | 14441 | (+) | NNNNATGCAAATNAN       | GAGTTTATAAATTAT         |
|        |            | 0.80429 |       |     |                       |                         |
| M00162 | V\$OCT1_06 | 7       | 14447 | (+) | CWNAWTKWSATRYN        | ATAAATTATATAAT          |
|        |            | 0.88423 |       |     |                       |                         |
| M00137 | V\$OCT1_03 | 5       | 14453 | (+) | NNNRTAATNANNN         | TATATAATAATTA           |
|        |            | 0.81980 |       |     |                       |                         |
| M00248 | V\$OCT1_07 | 1       | 14453 | (+) | TNTATGNTAATT          | TATATAATAATT            |
|        |            | 0.89095 |       |     |                       |                         |
| M00137 | V\$OCT1_03 | 2       | 14456 | (+) | NNNRTAATNANNN         | ATAATAATTAAAT           |

|        |            |         |       |     |                       |                         |  |
|--------|------------|---------|-------|-----|-----------------------|-------------------------|--|
|        |            | 0.93242 |       |     |                       |                         |  |
| M00162 | V\$OCT1_06 | 2       | 14458 | (+) | CWNAWTKWSATRYN        | AATAATTAAATTCA          |  |
|        |            | 0.82695 |       |     |                       |                         |  |
| M00162 | V\$OCT1_06 | 3       | 14459 | (-) | CWNAWTKWSATRYN        | ATAATTAAATTCAC          |  |
|        |            | 0.78478 |       |     |                       |                         |  |
| M00136 | V\$OCT1_02 | 6       | 14461 | (+) | NNGAATATKCANNNN       | AATTAAATTCACACT         |  |
|        |            | 0.80039 |       |     |                       |                         |  |
| M00162 | V\$OCT1_06 | 1       | 14509 | (+) | CWNAWTKWSATRYN        | GTGTTAGTAATGCA          |  |
|        |            | 0.79506 |       |     | NNNNNNNNWATGCAAATNNNW |                         |  |
| M00138 | V\$OCT1_04 | 5       | 14510 | (+) | NNW                   | TGTTAGTAATGCAGGTTCTTGGA |  |
|        |            | 0.79778 |       |     | NNNNNNNNWATGCAAATNNNW |                         |  |
| M00138 | V\$OCT1_04 | 3       | 14560 | (-) | NNW                   | AAGTGATTATTCATTACCCCTC  |  |
|        |            | 0.92137 |       |     |                       |                         |  |
| M00137 | V\$OCT1_03 | 5       | 14568 | (-) | NNNRTAATNANNN         | TATTCATTACCCC           |  |
|        |            | 0.79549 |       |     |                       |                         |  |
| M00135 | V\$OCT1_01 | 8       | 14606 | (-) | NNNNWTATGCAAATNTNNN   | CCAAAATTCCTTACTGTG      |  |
|        |            | 0.82148 |       |     |                       |                         |  |
| M00162 | V\$OCT1_06 | 4       | 14608 | (-) | CWNAWTKWSATRYN        | AAAATTCCTTACT           |  |
|        |            | 0.85478 |       |     |                       |                         |  |
| M00248 | V\$OCT1_07 | 1       | 14610 | (-) | TNTATGNTAATT          | AATTCCTTACT             |  |
|        |            | 0.93515 |       |     |                       |                         |  |
| M00162 | V\$OCT1_06 | 6       | 14616 | (+) | CWNAWTKWSATRYN        | CTTACTGTGATTTA          |  |
|        |            | 0.74933 |       |     |                       |                         |  |
| M00135 | V\$OCT1_01 | 2       | 14621 | (-) | NNNNWTATGCAAATNTNNN   | TGTGATTACCATAGGGAA      |  |
|        |            | 0.85329 |       |     |                       |                         |  |
| M00248 | V\$OCT1_07 | 7       | 14625 | (-) | TNTATGNTAATT          | ATTACCATAGG             |  |
|        |            | 0.7314  |       |     | NNNNWTATGCAAATNTNNN   | CTTGTGATGCGAATAGCCA     |  |
|        |            | 0.79236 |       |     |                       |                         |  |
| M00136 | V\$OCT1_02 | 6       | 14684 | (-) | NNGAATATKCANNNN       | GATGCGAATAGCCAT         |  |
|        |            | 0.80859 |       |     |                       |                         |  |
| M00162 | V\$OCT1_06 | 4       | 14697 | (+) | CWNAWTKWSATRYN        | ATGTCTGAAATGAA          |  |
|        |            | 0.83398 |       |     |                       |                         |  |
| M00162 | V\$OCT1_06 | 4       | 14698 | (-) | CWNAWTKWSATRYN        | TGTCTGAAATGAAT          |  |
|        |            | 0.84765 |       |     |                       |                         |  |
| M00162 | V\$OCT1_06 | 6       | 14701 | (+) | CWNAWTKWSATRYN        | CTGAAATGAATGCA          |  |
|        |            | 0.90625 |       |     | CWNAWTKWSATRYN        | TGAATGCAATGATT          |  |
|        |            | 0.80008 |       |     | NNNNNNNNWATGCAAATNNNW |                         |  |
| M00138 | V\$OCT1_04 | 4       | 14715 | (-) | NNW                   | ATGATTCATTTTCAGAGATTCAA |  |
|        |            | 0.82187 |       |     |                       |                         |  |
| M00162 | V\$OCT1_06 | 5       | 14729 | (-) | CWNAWTKWSATRYN        | GAGATTCAAAACTG          |  |

|        |            |         |       |     |                       |                          |
|--------|------------|---------|-------|-----|-----------------------|--------------------------|
|        |            | 0.80820 |       |     |                       |                          |
| M00162 | V\$OCT1_06 | 3       | 14742 | (-) | CWNAWTKWSATRYN        | GATTTCTCATACAC           |
|        |            | 0.78523 |       |     | NNNNNNNNWATGCAAATNNNW |                          |
| M00138 | V\$OCT1_04 | 6       | 14756 | (-) | NNW                   | TGTTGCTTTTTCAATGGTCTTTC  |
|        |            | 0.80468 |       |     |                       |                          |
| M00162 | V\$OCT1_06 | 7       | 14924 | (-) | CWNAWTKWSATRYN        | ACTATGCCACTGTG           |
|        |            | 0.83437 |       |     |                       |                          |
| M00162 | V\$OCT1_06 | 5       | 14940 | (+) | CWNAWTKWSATRYN        | GGTAAGTTCATTTA           |
|        |            | 0.83291 |       |     | NNNNNNNNWATGCAAATNNNW |                          |
| M00138 | V\$OCT1_04 | 5       | 14941 | (+) | NNW                   | GTAAGTTCATTTAAATGACTGCA  |
|        |            | 0.80405 |       |     | NNNNNNNNWATGCAAATNNNW |                          |
| M00138 | V\$OCT1_04 | 7       | 14942 | (-) | NNW                   | TAAGTTCATTTAAATGACTGCAT  |
|        |            | 0.80076 |       |     |                       |                          |
| M00195 | V\$OCT1_Q6 | 4       | 14945 | (+) | NNNNATGCAAATNAN       | GTTCATTTAAATGAC          |
|        |            | 0.84765 |       |     |                       |                          |
| M00162 | V\$OCT1_06 | 6       | 14946 | (-) | CWNAWTKWSATRYN        | TTCATTTAAATGAC           |
|        |            | 0.91851 |       |     |                       |                          |
| M00136 | V\$OCT1_02 | 7       | 14956 | (-) | NNGAATATKCANNNN       | TGACTGCATATTGCT          |
|        |            | 0.79715 |       |     | NNNNNNNNWATGCAAATNNNW |                          |
| M00138 | V\$OCT1_04 | 6       | 14993 | (+) | NNW                   | AAAACATAATATAAAAAATAAATT |
|        |            | 0.79673 |       |     | NNNNNNNNWATGCAAATNNNW |                          |
| M00138 | V\$OCT1_04 | 8       | 14995 | (+) | NNW                   | AACATAATATAAAAAATAAATTTA |
|        |            | 0.81806 |       |     | NNNNNNNNWATGCAAATNNNW |                          |
| M00138 | V\$OCT1_04 | 8       | 14996 | (-) | NNW                   | ACATAATATAAAAAATAAATTTAG |
|        |            | 0.80937 |       |     |                       |                          |
| M00162 | V\$OCT1_06 | 5       | 15000 | (-) | CWNAWTKWSATRYN        | AATATAAAAAATAAA          |
|        |            |         |       |     | NNNNNNNNWATGCAAATNNNW |                          |
| M00138 | V\$OCT1_04 | 0.7867  | 15005 | (+) | NNW                   | AAAAATAAATTTAGAATAAGCAT  |
|        |            | 0.85273 |       |     |                       |                          |
| M00162 | V\$OCT1_06 | 4       | 15005 | (-) | CWNAWTKWSATRYN        | AAAAATAAATTTAG           |
|        |            |         |       |     | NNNNNNNNWATGCAAATNNNW |                          |
| M00138 | V\$OCT1_04 | 0.84839 | 15007 | (-) | NNW                   | AAATAAATTTAGAATAAGCATGA  |
|        |            | 0.79397 |       |     |                       |                          |
| M00135 | V\$OCT1_01 | 2       | 15009 | (-) | NNNNWTATGCAAATNTNNN   | ATAAATTTAGAATAAGCAT      |
|        |            | 0.81321 |       |     |                       |                          |
| M00136 | V\$OCT1_02 | 1       | 15013 | (-) | NNGAATATKCANNNN       | ATTTAGAATAAGCAT          |
|        |            |         |       |     | NNNNNNNNWATGCAAATNNNW |                          |
| M00138 | V\$OCT1_04 | 0.83187 | 15013 | (-) | NNW                   | ATTTAGAATAAGCATGACACTTA  |
|        |            | 0.79372 |       |     |                       |                          |
| M00248 | V\$OCT1_07 | 5       | 15013 | (-) | TNTATGNTAATT          | ATTTAGAATAAG             |

|        |            |         |       |     |                       |                         |
|--------|------------|---------|-------|-----|-----------------------|-------------------------|
| M00135 | V\$OCT1_01 | 0.7314  | 15015 | (-) | NNNNWTATGCAAATNTNNN   | TTAGAATAAGCATGACACT     |
|        |            | 0.80887 |       |     |                       |                         |
| M00136 | V\$OCT1_02 | 9       | 15016 | (+) | NNGAATATKCANNNN       | TAGAATAAGCATGAC         |
|        |            | 0.81004 |       |     |                       |                         |
| M00248 | V\$OCT1_07 | 9       | 15019 | (-) | TNTATGNTAATT          | AATAAGCATGAC            |
|        |            | 0.82382 |       |     |                       |                         |
| M00162 | V\$OCT1_06 | 8       | 15022 | (+) | CWNAWTKWSATRYN        | AAGCATGACACTTA          |
| M00162 | V\$OCT1_06 | 0.825   | 15023 | (-) | CWNAWTKWSATRYN        | AGCATGACACTTAA          |
|        |            | 0.91953 |       |     |                       |                         |
| M00162 | V\$OCT1_06 | 1       | 15028 | (+) | CWNAWTKWSATRYN        | GACACTTAAATGCT          |
|        |            | 0.80859 |       |     |                       |                         |
| M00162 | V\$OCT1_06 | 4       | 15028 | (-) | CWNAWTKWSATRYN        | GACACTTAAATGCT          |
|        |            | 0.73254 |       |     |                       |                         |
| M00135 | V\$OCT1_01 | 5       | 15045 | (+) | NNNNWTATGCAAATNTNNN   | TGTCCTATGCTAGAATTTT     |
|        |            | 0.82187 |       |     |                       |                         |
| M00136 | V\$OCT1_02 | 3       | 15052 | (-) | NNGAATATKCANNNN       | TGCTAGAATTTTCTG         |
|        |            | 0.83207 |       |     | NNNNNNNNWATGCAAATNNNW |                         |
| M00138 | V\$OCT1_04 | 9       | 15061 | (+) | NNW                   | TTTCTGAAATGGAAAATTGATGA |
|        |            | 0.74914 |       |     |                       |                         |
| M00135 | V\$OCT1_01 | 2       | 15063 | (+) | NNNNWTATGCAAATNTNNN   | TCTGAAATGGAAAATTGAT     |
|        |            | 0.85546 |       |     |                       |                         |
| M00162 | V\$OCT1_06 | 9       | 15066 | (-) | CWNAWTKWSATRYN        | GAAATGGAAAATTG          |
|        |            | 0.82656 |       |     |                       |                         |
| M00162 | V\$OCT1_06 | 2       | 15085 | (+) | CWNAWTKWSATRYN        | AACTTTCTGATATA          |
|        |            | 0.84765 |       |     |                       |                         |
| M00162 | V\$OCT1_06 | 6       | 15087 | (+) | CWNAWTKWSATRYN        | CTTTCTGATATATG          |
|        |            | 0.78126 |       |     | NNNNNNNNWATGCAAATNNNW |                         |
| M00138 | V\$OCT1_04 | 3       | 15097 | (+) | NNW                   | TATGGCTAATGTTAATCCATTAC |
|        |            | 0.75410 |       |     |                       |                         |
| M00135 | V\$OCT1_01 | 1       | 15099 | (+) | NNNNWTATGCAAATNTNNN   | TGGCTAATGTTAATCCATT     |
|        |            | 0.85262 |       |     |                       |                         |
| M00137 | V\$OCT1_03 | 7       | 15099 | (+) | NNNRTAATNANNN         | TGGCTAATGTAA            |
|        |            | 0.79160 |       |     |                       |                         |
| M00248 | V\$OCT1_07 | 5       | 15102 | (+) | TNTATGNTAATT          | CTAATGTTAATC            |
| M00137 | V\$OCT1_03 | 0.86448 | 15110 | (-) | NNNRTAATNANNN         | AATCCATTACTCA           |
|        |            | 0.81367 |       |     |                       |                         |
| M00162 | V\$OCT1_06 | 2       | 15143 | (+) | CWNAWTKWSATRYN        | ATCTATTGATAAG           |
|        |            | 0.78084 |       |     | NNNNNNNNWATGCAAATNNNW |                         |
| M00138 | V\$OCT1_04 | 5       | 15147 | (+) | NNW                   | ATTGATAAGTGATAATCATTCT  |



|        |            |         |       |     |                       |                          |  |
|--------|------------|---------|-------|-----|-----------------------|--------------------------|--|
|        |            | 0.79639 |       |     |                       |                          |  |
| M00195 | V\$OCT1_Q6 | 7       | 15152 | (+) | NNNNATGCAAATNAN       | ATAAGTGATAATCAT          |  |
|        |            | 0.89687 |       |     |                       |                          |  |
| M00137 | V\$OCT1_03 | 9       | 15156 | (+) | NNNRTAATNANNN         | GTGATAATCATTC            |  |
|        |            | 0.81116 |       |     | NNNNNNNNWATGCAAATNNNW |                          |  |
| M00138 | V\$OCT1_04 | 7       | 15157 | (+) | NNW                   | TGATAATCATCTCTGATGAAAATA |  |
|        |            | 0.83291 |       |     | NNNNNNNNWATGCAAATNNNW |                          |  |
| M00138 | V\$OCT1_04 | 5       | 15163 | (+) | NNW                   | TCATTCTGATGAAAATAGGAGGA  |  |
|        |            | 0.73922 |       |     |                       |                          |  |
| M00135 | V\$OCT1_01 | 2       | 15165 | (+) | NNNNWTATGCAAATNTNNN   | ATTCTGATGAAAATAGGAG      |  |
|        |            | 0.83479 |       |     | NNNNNNNNWATGCAAATNNNW |                          |  |
| M00138 | V\$OCT1_04 | 7       | 15200 | (+) | NNW                   | AAGTAAAAATTCAACTTTATCCT  |  |
| M00136 | V\$OCT1_02 | 0.82837 | 15202 | (+) | NNGAATATKCANNNN       | GTAAAAATTCAACTT          |  |
|        |            | 0.80071 |       |     | NNNNNNNNWATGCAAATNNNW |                          |  |
| M00138 | V\$OCT1_04 | 1       | 15225 | (+) | NNW                   | TTGCACTTTTGCTAATCTTTAAA  |  |
|        |            | 0.79797 |       |     |                       |                          |  |
| M00135 | V\$OCT1_01 | 8       | 15227 | (+) | NNNNWTATGCAAATNTNNN   | GCACTTTTGCTAATCTTTA      |  |
| M00162 | V\$OCT1_06 | 0.90625 | 15238 | (+) | CWNAWTKWSATRYN        | AATCTTTAAATGCC           |  |
|        |            | 0.81367 |       |     |                       |                          |  |
| M00162 | V\$OCT1_06 | 2       | 15238 | (-) | CWNAWTKWSATRYN        | AATCTTTAAATGCC           |  |
|        |            | 0.82929 |       |     |                       |                          |  |
| M00162 | V\$OCT1_06 | 7       | 15244 | (-) | CWNAWTKWSATRYN        | TAAATGCCTTTCTT           |  |
|        |            | 0.83772 |       |     | NNNNNNNNWATGCAAATNNNW |                          |  |
| M00138 | V\$OCT1_04 | 5       | 15266 | (-) | NNW                   | ACCCATGATATACATTAGAATGC  |  |
| M00136 | V\$OCT1_02 | 0.78262 | 15279 | (+) | NNGAATATKCANNNN       | ATTAGAATGCAATGT          |  |
|        |            | 0.85546 |       |     |                       |                          |  |
| M00162 | V\$OCT1_06 | 9       | 15282 | (-) | CWNAWTKWSATRYN        | AGAATGCAATGTGG           |  |
|        |            | 0.86562 |       |     |                       |                          |  |
| M00162 | V\$OCT1_06 | 5       | 15307 | (+) | CWNAWTKWSATRYN        | CAGATTTTGACATT           |  |
| M00162 | V\$OCT1_06 | 0.90625 | 15309 | (+) | CWNAWTKWSATRYN        | GATTTTGACATTCC           |  |
| M00162 | V\$OCT1_06 | 0.80625 | 15330 | (+) | CWNAWTKWSATRYN        | CTAACTTGAAATCC           |  |
|        |            | 0.80664 |       |     |                       |                          |  |
| M00162 | V\$OCT1_06 | 1       | 15332 | (-) | CWNAWTKWSATRYN        | AACTTGAAATCCTG           |  |
|        |            | 0.83437 |       |     |                       |                          |  |
| M00162 | V\$OCT1_06 | 5       | 15345 | (+) | CWNAWTKWSATRYN        | GATCTTTTATTTT            |  |
|        |            | 0.81095 |       |     | NNNNNNNNWATGCAAATNNNW |                          |  |
| M00138 | V\$OCT1_04 | 8       | 15347 | (-) | NNW                   | TCITTTTATTTTCGCTTACTTGA  |  |
|        |            | 0.79234 |       |     | NNNNNNNNWATGCAAATNNNW |                          |  |
| M00138 | V\$OCT1_04 | 6       | 15358 | (-) | NNW                   | TCGCTTACTTGAAATAATATAAT  |  |

|        |            |         |       |     |                       |                          |
|--------|------------|---------|-------|-----|-----------------------|--------------------------|
| M00137 | V\$OCT1_03 | 0.92256 | 15373 | (+) | NNNRTAATNANNN         | AATATAATGATGT            |
|        |            | 0.80217 |       |     | NNNNNNNNWATGCAAATNNNW |                          |
| M00138 | V\$OCT1_04 | 5       | 15374 | (+) | NNW                   | ATATAATGATGTTTGTITTTTATA |
|        |            | 0.85223 |       |     |                       |                          |
| M00137 | V\$OCT1_03 | 2       | 15386 | (-) | NNNRTAATNANNN         | TTGTTTTTATAAC            |
|        |            | 0.84218 |       |     |                       |                          |
| M00162 | V\$OCT1_06 | 7       | 15405 | (+) | CWNAWTKWSATRYN        | GGTGATTAAATATA           |
|        |            | 0.81555 |       |     | NNNNNNNNWATGCAAATNNNW |                          |
| M00138 | V\$OCT1_04 | 8       | 15408 | (+) | NNW                   | GATTAAATATAATAATCTATTAA  |
|        |            | 0.75028 |       |     |                       |                          |
| M00135 | V\$OCT1_01 | 6       | 15410 | (+) | NNNNWTATGCAAATNTNNN   | TTAAATATAATAATCTATT      |
| M00162 | V\$OCT1_06 | 0.85    | 15411 | (-) | CWNAWTKWSATRYN        | TAAATATAATAATC           |
|        |            | 0.85183 |       |     |                       |                          |
| M00137 | V\$OCT1_03 | 7       | 15413 | (+) | NNNRTAATNANNN         | AATATAATAATCT            |
|        |            | 0.78962 |       |     | NNNNNNNNWATGCAAATNNNW |                          |
| M00138 | V\$OCT1_04 | 8       | 15420 | (-) | NNW                   | TAATCTATTAAGCATACTGCTGG  |
|        |            | 0.76535 |       |     |                       |                          |
| M00135 | V\$OCT1_01 | 7       | 15422 | (-) | NNNNWTATGCAAATNTNNN   | ATCTATTAAGCATACTGCT      |
|        |            | 0.79534 |       |     |                       |                          |
| M00136 | V\$OCT1_02 | 4       | 15426 | (-) | NNGAATATKCANNNN       | ATTAAGCATACTGCT          |
|        |            | 0.92968 |       |     |                       |                          |
| M00162 | V\$OCT1_06 | 8       | 15456 | (+) | CWNAWTKWSATRYN        | CATTTTTTGATTTA           |
|        |            | 0.83479 |       |     | NNNNNNNNWATGCAAATNNNW |                          |
| M00138 | V\$OCT1_04 | 7       | 15459 | (-) | NNW                   | TTTTGATTTAGCAAAATTTTAT   |
| M00135 | V\$OCT1_01 | 0.77356 | 15461 | (-) | NNNNWTATGCAAATNTNNN   | TTTGATTTAGCAAAATTTT      |
|        |            | 0.78251 |       |     | NNNNNNNNWATGCAAATNNNW |                          |
| M00138 | V\$OCT1_04 | 8       | 15461 | (+) | NNW                   | TTTGATTTAGCAAAATTTTATTA  |
|        |            | 0.73903 |       |     |                       |                          |
| M00135 | V\$OCT1_01 | 1       | 15462 | (+) | NNNNWTATGCAAATNTNNN   | TTGATTTAGCAAAATTTTA      |
|        |            | 0.80468 |       |     |                       |                          |
| M00162 | V\$OCT1_06 | 7       | 15471 | (+) | CWNAWTKWSATRYN        | CAAAATTTTATTAC           |
|        |            | 0.83945 |       |     |                       |                          |
| M00162 | V\$OCT1_06 | 3       | 15472 | (+) | CWNAWTKWSATRYN        | AAAATTTTATTACT           |
|        |            | 0.83476 |       |     |                       |                          |
| M00162 | V\$OCT1_06 | 6       | 15472 | (-) | CWNAWTKWSATRYN        | AAAATTTTATTACT           |
|        |            | 0.88186 |       |     |                       |                          |
| M00137 | V\$OCT1_03 | 5       | 15475 | (-) | NNNRTAATNANNN         | ATTTTATTACTGA            |
|        |            | 0.80008 |       |     |                       |                          |
| M00248 | V\$OCT1_07 | 5       | 15564 | (+) | TNTATGNTAATT          | TCITTGGTAAGT             |

|        |            |         |       |                |                         |                          |  |
|--------|------------|---------|-------|----------------|-------------------------|--------------------------|--|
|        |            | 0.82929 |       |                |                         |                          |  |
| M00162 | V\$OCT1_06 | 7       | 15577 | (+)            | CWNAWTKWSATRYN          | GGAAATTGCTTGTC           |  |
|        |            | 0.79448 |       |                |                         |                          |  |
| M00195 | V\$OCT1_Q6 | 7       | 15577 | (-)            | NNNNATGCAAATNAN         | GGAAATTGCTTGCT           |  |
|        |            | 0.81869 |       |                | NNNNNNNNWATGCAAATNNNW   |                          |  |
| M00138 | V\$OCT1_04 | 5       | 15592 | (-)            | NNW                     | TGATCCTCTTTTCATATGAATAC  |  |
| M00135 | V\$OCT1_01 | 0.76116 | 15594 | (-)            | NNNNWTATGCAAATNTNNN     | ATCCTCTTTTCATATGAAT      |  |
|        |            | 0.86054 |       |                |                         |                          |  |
| M00162 | V\$OCT1_06 | 7       | 15596 | (+)            | CWNAWTKWSATRYN          | CCTCTTTTCATATG           |  |
|        |            | 0.85131 |       |                | NNNNNNNNWATGCAAATNNNW   |                          |  |
| M00138 | V\$OCT1_04 | 7       | 15598 | (-)            | NNW                     | TCTTTTCATATGAATACAAAGGT  |  |
|        |            | 0.80390 |       |                |                         |                          |  |
| M00162 | V\$OCT1_06 | 6       | 15667 | (+)            | CWNAWTKWSATRYN          | TATATTAGACACA            |  |
|        |            | 0.84314 |       |                |                         |                          |  |
| M00137 | V\$OCT1_03 | 5       | 15675 | (-)            | NNNRTAATNANNN           | GACACATTACACT            |  |
|        |            | 0.87382 |       |                |                         |                          |  |
| M00162 | V\$OCT1_06 | 8       | 15677 | (-)            | CWNAWTKWSATRYN          | CACATTACACTTAG           |  |
|        |            | 0.83667 |       |                | NNNNNNNNWATGCAAATNNNW   |                          |  |
| M00138 | V\$OCT1_04 | 9       | 15687 | (-)            | NNW                     | TTAGATAATATCAATAATTAAAT  |  |
|        |            | 0.79118 |       |                |                         |                          |  |
| M00248 | V\$OCT1_07 | 1       | 15693 | (-)            | TNTATGNTAATT            | AATATCAATAAT             |  |
|        |            | 0.87830 |       |                |                         |                          |  |
| M00137 | V\$OCT1_03 | 9       | 15697 | (+)            | NNNRTAATNANNN           | TCAATAATTAAAT            |  |
|        |            | 0.84257 |       |                |                         |                          |  |
| M00162 | V\$OCT1_06 | 8       | 15699 | (+)            | CWNAWTKWSATRYN          | AATAATTAAATTGG           |  |
|        |            | 0.78335 |       |                | NNNNNNNNWATGCAAATNNNW   |                          |  |
| M00138 | V\$OCT1_04 | 4       | 15701 | (-)            | NNW                     | TAATTAAATTGGCTTCAACATTT  |  |
|        |            | 0.80656 |       |                | NNNNNNNNWATGCAAATNNNW   |                          |  |
| M00138 | V\$OCT1_04 | 6       | 15716 | (-)            | NNW                     | CAACATTTTTTTGTATTATAATAA |  |
|        |            | 0.82977 |       |                | NNNNNNNNWATGCAAATNNNW   |                          |  |
| M00138 | V\$OCT1_04 | 8       | 15721 | (+)            | NNW                     | TTTTTTGTATTATAATAATATCA  |  |
|        |            | 0.83396 |       |                | NNNNNNNNWATGCAAATNNNW   |                          |  |
| M00138 | V\$OCT1_04 | 1       | 15722 | (-)            | NNW                     | TTTTTGATTATAATAATATCAA   |  |
|        |            | 0.78147 |       |                | NNNNNNNNWATGCAAATNNNW   |                          |  |
| M00138 | V\$OCT1_04 | 2       | 15724 | (+)            | NNW                     | TTTGATTATAATAATATCAAAT   |  |
|        |            | 0.80343 |       |                | NNNNNNNNWATGCAAATNNNW   |                          |  |
| M00138 | V\$OCT1_04 | 15725   | (-)   | NNW            | TTGTATTATAATAATATCAAATT |                          |  |
|        |            | 0.75753 |       |                |                         |                          |  |
| M00135 | V\$OCT1_01 | 5       | 15726 | (+)            | NNNNWTATGCAAATNTNNN     | TGTATTATAATAATATCAA      |  |
|        |            | 0.84492 |       |                |                         |                          |  |
| M00162 | V\$OCT1_06 | 15726   | (-)   | CWNAWTKWSATRYN | TGTATTATAATAAT          |                          |  |

|        |            |         |       |     |                       |                         |  |
|--------|------------|---------|-------|-----|-----------------------|-------------------------|--|
|        |            | 2       |       |     |                       |                         |  |
|        |            | 0.91070 |       |     |                       |                         |  |
| M00137 | V\$OCT1_03 | 7       | 15729 | (+) | NNNRTAATNANNN         | ATTATAATAATAT           |  |
|        |            | 0.82204 |       |     | NNNNNNNNWATGCAAATNNNW |                         |  |
| M00138 | V\$OCT1_04 | 1       | 15730 | (+) | NNW                   | TTATAATAATATCAAATTTAAGT |  |
|        |            | 0.88632 |       |     |                       |                         |  |
| M00162 | V\$OCT1_06 | 8       | 15737 | (-) | CWNAWTKWSATRYN        | AATATCAAATTTAA          |  |
|        |            | 0.81367 |       |     | NNNNNNNNWATGCAAATNNNW |                         |  |
| M00138 | V\$OCT1_04 | 6       | 15738 | (-) | NNW                   | ATATCAAATTTAAGTAACAATAA |  |
|        |            | 0.89101 |       |     |                       |                         |  |
| M00162 | V\$OCT1_06 | 6       | 15742 | (-) | CWNAWTKWSATRYN        | CAAATTTAAGTAAC          |  |
|        |            | 0.83709 |       |     | NNNNNNNNWATGCAAATNNNW |                         |  |
| M00138 | V\$OCT1_04 | 7       | 15762 | (+) | NNW                   | ACTAGCTAATTTTAATTAATATA |  |
|        |            | 0.81451 |       |     | NNNNNNNNWATGCAAATNNNW |                         |  |
| M00138 | V\$OCT1_04 | 3       | 15763 | (-) | NNW                   | CTAGCTAATTTTAATTAATATAA |  |
|        |            | 0.85820 |       |     |                       |                         |  |
| M00162 | V\$OCT1_06 | 3       | 15767 | (+) | CWNAWTKWSATRYN        | CTAATTTTAATTAA          |  |
|        |            | 0.80240 |       |     |                       |                         |  |
| M00195 | V\$OCT1_Q6 | 2       | 15767 | (-) | NNNNATGCAAATNAN       | CTAATTTTAATTAAT         |  |
|        |            | 0.83082 |       |     |                       |                         |  |
| M00248 | V\$OCT1_07 | 5       | 15767 | (+) | TNTATGNTAATT          | CTAATTTTAATT            |  |
|        |            | 0.82643 |       |     | NNNNNNNNWATGCAAATNNNW |                         |  |
| M00138 | V\$OCT1_04 | 2       | 15768 | (+) | NNW                   | TAATTTTAATTAATATAATTIAT |  |
|        |            | 0.83437 |       |     |                       |                         |  |
| M00162 | V\$OCT1_06 | 5       | 15768 | (-) | CWNAWTKWSATRYN        | TAATTTTAATTAAT          |  |
|        |            |         |       |     | NNNNNNNNWATGCAAATNNNW |                         |  |
| M00138 | V\$OCT1_04 | 0.83417 | 15769 | (-) | NNW                   | AATTTTAATTAATATAATTTATT |  |
|        |            | 0.74914 |       |     |                       |                         |  |
| M00135 | V\$OCT1_01 | 2       | 15771 | (-) | NNNNWTATGCAAATNTNNN   | TTTAAATTAATATAAATTA     |  |
|        |            | 0.79778 |       |     | NNNNNNNNWATGCAAATNNNW |                         |  |
| M00138 | V\$OCT1_04 | 3       | 15773 | (-) | NNW                   | TTAATTAATATAATTTATTATAT |  |
|        |            | 0.87216 |       |     |                       |                         |  |
| M00248 | V\$OCT1_07 | 5       | 15775 | (-) | TNTATGNTAATT          | AATTAATATAAT            |  |
|        |            | 0.83984 |       |     |                       |                         |  |
| M00162 | V\$OCT1_06 | 4       | 15776 | (+) | CWNAWTKWSATRYN        | ATTAATATAATTTA          |  |
|        |            | 0.85815 |       |     |                       |                         |  |
| M00137 | V\$OCT1_03 | 9       | 15784 | (-) | NNNRTAATNANNN         | AATTTATTATATT           |  |
|        |            | 0.84483 |       |     | NNNNNNNNWATGCAAATNNNW |                         |  |
| M00138 | V\$OCT1_04 | 5       | 15786 | (+) | NNW                   | TTTATTATATTGAAATTTCTACA |  |
|        |            |         |       |     |                       |                         |  |
| M00138 | V\$OCT1_04 |         | 15787 | (-) |                       | TTATTATATTGAAATTTCTACAC |  |
|        |            | 0.81451 |       |     | NNNNNNNNWATGCAAATNNNW |                         |  |

|        |            |         |       |     |                       |                         |
|--------|------------|---------|-------|-----|-----------------------|-------------------------|
|        |            | 3       |       |     | NNW                   |                         |
|        |            | 0.78405 |       |     |                       |                         |
| M00135 | V\$OCT1_01 | 2       | 15788 | (+) | NNNNWTATGCAAATNTNNN   | TATTATATTGAAATTTCTA     |
|        |            | 0.85546 |       |     |                       |                         |
| M00162 | V\$OCT1_06 | 9       | 15791 | (+) | CWNAWTKWSATRYN        | TATATTGAAATTTTC         |
|        |            | 0.86054 |       |     |                       |                         |
| M00162 | V\$OCT1_06 | 7       | 15791 | (-) | CWNAWTKWSATRYN        | TATATTGAAATTTTC         |
|        |            | 0.90841 |       |     |                       |                         |
| M00248 | V\$OCT1_07 | 6       | 15791 | (+) | TNTATGNTAATT          | TATATTGAAATT            |
| M00137 | V\$OCT1_03 | 0.86448 | 15862 | (-) | NNNRTAATNANNN         | TATTCTTTATGAT           |
| M00162 | V\$OCT1_06 | 0.80625 | 15873 | (+) | CWNAWTKWSATRYN        | ATCACTGGAATAGA          |
|        |            | 0.79088 |       |     | NNNNNNNNWATGCAAATNNNW |                         |
| M00138 | V\$OCT1_04 | 2       | 15874 | (+) | NNW                   | TCACTGGAATAGAAATACTTAAA |
|        |            | 0.82656 |       |     |                       |                         |
| M00162 | V\$OCT1_06 | 2       | 15879 | (+) | CWNAWTKWSATRYN        | GGAATAGAAATACT          |
|        |            |         |       |     | NNNNNNNNWATGCAAATNNNW |                         |
| M00138 | V\$OCT1_04 | 0.79381 | 15880 | (+) | NNW                   | GAATAGAAATACTTAAAAAGTCA |
|        |            | 0.78293 |       |     | NNNNNNNNWATGCAAATNNNW |                         |
| M00138 | V\$OCT1_04 | 6       | 15882 | (+) | NNW                   | ATAGAAATACTTAAAAAGTCACA |
|        |            | 0.80820 |       |     |                       |                         |
| M00162 | V\$OCT1_06 | 3       | 15896 | (-) | CWNAWTKWSATRYN        | AAAGTCACATAGTT          |
|        |            | 0.82109 |       |     |                       |                         |
| M00162 | V\$OCT1_06 | 4       | 15909 | (-) | CWNAWTKWSATRYN        | TAAATCAAGTATTT          |
|        |            |         |       |     | NNNNNNNNWATGCAAATNNNW |                         |
| M00138 | V\$OCT1_04 | 0.78189 | 15935 | (+) | NNW                   | GAAAACAGATTTAAATGTCCATA |
|        |            |         |       |     | NNNNNNNNWATGCAAATNNNW |                         |
| M00138 | V\$OCT1_04 | 0.79611 | 15936 | (-) | NNW                   | AAAACAGATTTAAATGTCCATAG |
|        |            | 0.94570 |       |     |                       |                         |
| M00162 | V\$OCT1_06 | 3       | 15940 | (+) | CWNAWTKWSATRYN        | CAGATTTAAATGTC          |
|        |            | 0.84257 |       |     |                       |                         |
| M00162 | V\$OCT1_06 | 8       | 15940 | (-) | CWNAWTKWSATRYN        | CAGATTTAAATGTC          |
|        |            | 0.74093 |       |     |                       |                         |
| M00135 | V\$OCT1_01 | 9       | 15944 | (-) | NNNNWTATGCAAATNTNNN   | TTTAAATGTCCATAGATGT     |
|        |            | 0.87407 |       |     |                       |                         |
| M00248 | V\$OCT1_07 | 3       | 15948 | (-) | TNTATGNTAATT          | AATGTCCATAGA            |
|        |            | 0.78523 |       |     | NNNNNNNNWATGCAAATNNNW |                         |
| M00138 | V\$OCT1_04 | 6       | 15957 | (-) | NNW                   | AGATGTGTTTTGAGTACTTCAGT |
|        |            | 0.80664 |       |     |                       |                         |
| M00162 | V\$OCT1_06 | 1       | 15992 | (-) | CWNAWTKWSATRYN        | AGCTTGTAGTTGTG          |

|        |            |         |       |     |                       |                         |
|--------|------------|---------|-------|-----|-----------------------|-------------------------|
|        |            | 0.85273 |       |     |                       |                         |
| M00162 | V\$OCT1_06 | 4       | 16053 | (-) | CWNAWTKWSATRYN        | CAGATCAAAAGAAG          |
|        |            | 0.80312 |       |     |                       |                         |
| M00162 | V\$OCT1_06 | 5       | 16066 | (-) | CWNAWTKWSATRYN        | GGAAAGTAAAAGTC          |
|        |            | 0.89335 |       |     |                       |                         |
| M00162 | V\$OCT1_06 | 9       | 16075 | (+) | CWNAWTKWSATRYN        | AAGTCTGACATACG          |
|        |            | 0.82768 |       |     | NNNNNNNNWATGCAAATNNNW |                         |
| M00138 | V\$OCT1_04 | 7       | 16094 | (-) | NNW                   | GTTTTACTTTGAATTATTTTGC  |
|        |            | 0.79448 |       |     |                       |                         |
| M00195 | V\$OCT1_Q6 | 7       | 16098 | (-) | NNNNATGCAAATNAN       | TTACTTTGAATTATT         |
| M00136 | V\$OCT1_02 | 0.77098 | 16100 | (-) | NNGAATATKCANNNN       | ACTTTGAATTATTTT         |
|        |            | 0.78879 |       |     | NNNNNNNNWATGCAAATNNNW |                         |
| M00138 | V\$OCT1_04 | 1       | 16104 | (-) | NNW                   | TGAATTATTTTGCCATATTTTCT |
|        |            | 0.73292 |       |     |                       |                         |
| M00135 | V\$OCT1_01 | 6       | 16107 | (-) | NNNNWTATGCAAATNTNNN   | ATTATTTTGCCATATTTTC     |
|        |            | 0.85507 |       |     |                       |                         |
| M00162 | V\$OCT1_06 | 8       | 16156 | (+) | CWNAWTKWSATRYN        | ATAAATTGCCTGTA          |
|        |            | 0.78168 |       |     | NNNNNNNNWATGCAAATNNNW |                         |
| M00138 | V\$OCT1_04 | 1       | 16157 | (+) | NNW                   | TAAATTGCCTGTAAAACTTAAAA |
|        |            | 0.83671 |       |     |                       |                         |
| M00162 | V\$OCT1_06 | 9       | 16162 | (-) | CWNAWTKWSATRYN        | TGCCTGTAAAACTT          |
|        |            | 0.82148 |       |     |                       |                         |
| M00162 | V\$OCT1_06 | 4       | 16169 | (+) | CWNAWTKWSATRYN        | AAAACCTAAAAATC          |
|        |            | 0.80820 |       |     |                       |                         |
| M00162 | V\$OCT1_06 | 3       | 16169 | (-) | CWNAWTKWSATRYN        | AAAACCTAAAAATC          |
|        |            | 0.80622 |       |     |                       |                         |
| M00195 | V\$OCT1_Q6 | 3       | 16170 | (+) | NNNNATGCAAATNAN       | AAACTTAAAAATCAG         |
|        |            | 0.83320 |       |     |                       |                         |
| M00162 | V\$OCT1_06 | 3       | 16215 | (-) | CWNAWTKWSATRYN        | CACATATAACTTTG          |
|        |            | 0.80429 |       |     |                       |                         |
| M00162 | V\$OCT1_06 | 7       | 16234 | (-) | CWNAWTKWSATRYN        | TTCATCTTAAGATG          |
|        |            | 0.80429 |       |     |                       |                         |
| M00162 | V\$OCT1_06 | 7       | 16236 | (+) | CWNAWTKWSATRYN        | CATCTTAAGATGAA          |
|        |            | 0.78711 |       |     | NNNNNNNNWATGCAAATNNNW |                         |
| M00138 | V\$OCT1_04 | 8       | 16248 | (+) | NNW                   | AAGAGAAAATGACTATTAAAGTG |
| M00136 | V\$OCT1_02 | 0.79372 | 16253 | (-) | NNGAATATKCANNNN       | AAAATGACTATTAAA         |
|        |            | 0.79590 |       |     | NNNNNNNNWATGCAAATNNNW |                         |
| M00138 | V\$OCT1_04 | 1       | 16254 | (+) | NNW                   | AAATGACTATTAAAGTGATCTT  |
|        |            | 0.77260 |       |     |                       |                         |
| M00136 | V\$OCT1_02 | 4       | 16256 | (+) | NNGAATATKCANNNN       | ATGACTATTAAAGTG         |

|        |            |         |       |     |                      |                         |
|--------|------------|---------|-------|-----|----------------------|-------------------------|
| M00136 | V\$OCT1_02 | 0.77856 | 16295 | (+) | NNGAATATKCANNNN      | CAAAACATGCAGCAT         |
|        |            | 0.81835 |       |     |                      |                         |
| M00136 | V\$OCT1_02 | 4       | 16313 | (-) | NNGAATATKCANNNN      | TAACTACATATTTCT         |
|        |            | 0.84218 |       |     |                      |                         |
| M00162 | V\$OCT1_06 | 7       | 16319 | (-) | CWNAWTKWSATRYN       | CATATTCTTTTTT           |
|        |            | 0.79966 |       |     | NNNNNNNWATGCAAATNNNW |                         |
| M00138 | V\$OCT1_04 | 5       | 16327 | (-) | NNW                  | TTTTTGATTACAGATGGGATT   |
| M00135 | V\$OCT1_01 | 0.75124 | 16329 | (-) | NNNNWTATGCAAATNTNNN  | TTTGATTACAGATGGGA       |
|        |            | 0.79066 |       |     |                      |                         |
| M00195 | V\$OCT1_Q6 | 6       | 16331 | (-) | NNNNATGCAAATNAN      | TTGATTACAGATGG          |
|        |            | 0.81795 |       |     |                      |                         |
| M00195 | V\$OCT1_Q6 | 9       | 16344 | (+) | NNNNATGCAAATNAN      | GGGATTGAAAATTCC         |
|        |            | 0.79913 |       |     |                      |                         |
| M00136 | V\$OCT1_02 | 4       | 16345 | (-) | NNGAATATKCANNNN      | GGATTGAAAATTCCA         |
|        |            | 0.81367 |       |     |                      |                         |
| M00162 | V\$OCT1_06 | 2       | 16345 | (-) | CWNAWTKWSATRYN       | GGATTGAAAATTCC          |
|        |            | 0.73712 |       |     |                      |                         |
| M00135 | V\$OCT1_01 | 3       | 16348 | (-) | NNNNWTATGCAAATNTNNN  | TTGAAAATTCCATGCTCTA     |
|        |            | 0.78316 |       |     |                      |                         |
| M00136 | V\$OCT1_02 | 2       | 16348 | (+) | NNGAATATKCANNNN      | TTGAAAATTCCATGC         |
|        |            | 0.89687 |       |     |                      |                         |
| M00162 | V\$OCT1_06 | 5       | 16350 | (+) | CWNAWTKWSATRYN       | GAAAATTCCATGCT          |
|        |            | 0.87265 |       |     |                      |                         |
| M00162 | V\$OCT1_06 | 6       | 16351 | (-) | CWNAWTKWSATRYN       | AAAATTCCATGCTC          |
|        |            | 0.80072 |       |     |                      |                         |
| M00248 | V\$OCT1_07 | 1       | 16352 | (-) | TNTATGNTAATT         | AAATTCCATGCT            |
|        |            | 0.81601 |       |     |                      |                         |
| M00162 | V\$OCT1_06 | 6       | 16359 | (+) | CWNAWTKWSATRYN       | ATGCTCTACATGTC          |
|        |            | 0.81331 |       |     |                      |                         |
| M00195 | V\$OCT1_Q6 | 9       | 16359 | (-) | NNNNATGCAAATNAN      | ATGCTCTACATGTCT         |
|        |            | 0.83437 |       |     |                      |                         |
| M00162 | V\$OCT1_06 | 5       | 16364 | (+) | CWNAWTKWSATRYN       | CTACATGTCTTTTC          |
|        |            | 0.80664 |       |     |                      |                         |
| M00162 | V\$OCT1_06 | 1       | 16365 | (-) | CWNAWTKWSATRYN       | TACATGTCTTTTCA          |
|        |            | 0.78147 |       |     | NNNNNNNWATGCAAATNNNW |                         |
| M00138 | V\$OCT1_04 | 2       | 16415 | (-) | NNW                  | TTGCTGTTTTAGAATAGGACAAT |
|        |            | 0.84726 |       |     |                      |                         |
| M00162 | V\$OCT1_06 | 6       | 16427 | (-) | CWNAWTKWSATRYN       | AATAGGACAATCTC          |
|        |            | 0.86054 |       |     |                      |                         |
| M00162 | V\$OCT1_06 | 7       | 16433 | (-) | CWNAWTKWSATRYN       | ACAATCTCAAATTG          |

|        |            |              |       |     |                             |                         |
|--------|------------|--------------|-------|-----|-----------------------------|-------------------------|
| M00162 | V\$OCT1_06 | 0.83476<br>6 | 16470 | (+) | CWNAWTKWSATRYN              | CTCTATTGTATTTT          |
| M00248 | V\$OCT1_07 | 0.83930<br>5 | 16471 | (+) | TNTATGNTAATT                | TCTATTGTATTT            |
| M00162 | V\$OCT1_06 | 0.84765<br>6 | 16476 | (-) | CWNAWTKWSATRYN              | TGTATTTTAGATTG          |
| M00162 | V\$OCT1_06 | 0.82656<br>2 | 16477 | (+) | CWNAWTKWSATRYN              | GTATTTTAGATTGT          |
| M00162 | V\$OCT1_06 | 0.84218<br>7 | 16501 | (-) | CWNAWTKWSATRYN              | TAAGTGAAATTGTC          |
| M00162 | V\$OCT1_06 | 0.80078<br>1 | 16525 | (+) | CWNAWTKWSATRYN              | GTTACCTAAATTCC          |
| M00162 | V\$OCT1_06 | 0.81406<br>2 | 16531 | (-) | CWNAWTKWSATRYN              | TAAATTCCAGTAGT          |
| M00162 | V\$OCT1_06 | 0.82929<br>7 | 16576 | (+) | CWNAWTKWSATRYN              | GGGAATTACAGTCT          |
| M00162 | V\$OCT1_06 | 0.87812<br>5 | 16577 | (-) | CWNAWTKWSATRYN              | GGAATTACAGTCTT          |
| M00137 | V\$OCT1_03 | 0.84037<br>9 | 16587 | (-) | NNNRTAATNANNN               | TCTTCATTAAATT           |
| M00162 | V\$OCT1_06 | 0.91171<br>9 | 16588 | (+) | CWNAWTKWSATRYN              | CTTCATTAAATTTT          |
| M00162 | V\$OCT1_06 | 0.84765<br>6 | 16589 | (-) | CWNAWTKWSATRYN              | TTCATTAAATTTCT          |
| M00138 | V\$OCT1_04 | 0.83375<br>2 | 16590 | (-) | NNNNNNNWATGCAAATNNNW<br>NNW | TCATTAAATTTCTATATGGAAAA |
| M00135 | V\$OCT1_01 | 0.80885<br>2 | 16592 | (-) | NNNNWTATGCAAATNTNNN         | ATTAAATTTCTATATGGAA     |
| M00162 | V\$OCT1_06 | 0.86054<br>7 | 16594 | (-) | CWNAWTKWSATRYN              | TAAATTTCTATATG          |
| M00248 | V\$OCT1_07 | 0.82552<br>5 | 16596 | (-) | TNTATGNTAATT                | AATTTCTATATG            |
| M00138 | V\$OCT1_04 | 0.80008<br>4 | 16597 | (+) | NNNNNNNWATGCAAATNNNW<br>NNW | ATTTCTATATGGAAAATGTTTTT |
| M00135 | V\$OCT1_01 | 0.80713<br>5 | 16599 | (+) | NNNNWTATGCAAATNTNNN         | TTCTATATGGAAAATGTTT     |
| M00162 | V\$OCT1_06 | 0.81367<br>2 | 16601 | (+) | CWNAWTKWSATRYN              | CTATATGGAAAATG          |
| M00248 | V\$OCT1_07 | 0.86919<br>7 | 16602 | (+) | TNTATGNTAATT                | TATATGGAAAAT            |



|        |            |              |       |     |                             |                         |
|--------|------------|--------------|-------|-----|-----------------------------|-------------------------|
| M00162 | V\$OCT1_06 | 0.86796<br>9 | 16651 | (+) | CWNAWTKWSATRYN              | CATCATTTCAAATA          |
| M00195 | V\$OCT1_Q6 | 0.81004<br>4 | 16652 | (+) | NNNNATGCAAATNAN             | ATCATTTCAAATAAC         |
| M00162 | V\$OCT1_06 | 0.80039<br>1 | 16654 | (-) | CWNAWTKWSATRYN              | CATTTCAAATAACT          |
| M00162 | V\$OCT1_06 | 0.91679<br>7 | 16675 | (+) | CWNAWTKWSATRYN              | GTAAGTGAATTTT           |
| M00162 | V\$OCT1_06 | 0.80429<br>7 | 16676 | (-) | CWNAWTKWSATRYN              | TAACTGAGATTTTG          |
| M00162 | V\$OCT1_06 | 0.82109<br>4 | 16683 | (+) | CWNAWTKWSATRYN              | GATTTTGTCTTTCT          |
| M00138 | V\$OCT1_04 | 0.7867       | 16692 | (-) | NNNNNNNWATGCAAATNNNW<br>NNW | TTTCTTCTTTTCAATAAATTACA |
| M00162 | V\$OCT1_06 | 0.94531<br>2 | 16705 | (+) | CWNAWTKWSATRYN              | ATAAATTACATTTT          |
| M00195 | V\$OCT1_Q6 | 0.81823<br>1 | 16705 | (-) | NNNNATGCAAATNAN             | ATAAATTACATTTTA         |
| M00162 | V\$OCT1_06 | 0.86835<br>9 | 16706 | (-) | CWNAWTKWSATRYN              | TAAATTACATTTTA          |
| M00248 | V\$OCT1_07 | 0.79308<br>9 | 16707 | (-) | TNTATGNTAATT                | AAATTACATTTT            |
| M00059 | V\$YY1_01  | 0.79783<br>7 | 56    | (+) | NNNNNCCATNTWNNNWN           | TGTATACATATAAAAAA       |
| M00059 | V\$YY1_01  | 0.80963<br>3 | 190   | (-) | NNNNNCCATNTWNNNWN           | ATTTGCAAATGTTGATA       |
| M00059 | V\$YY1_01  | 0.88466<br>6 | 263   | (+) | NNNNNCCATNTWNNNWN           | CCTGATCATTTTTAAAA       |
| M00059 | V\$YY1_01  | 0.84895<br>2 | 292   | (-) | NNNNNCCATNTWNNNWN           | TACTGAAAATGTAGATA       |
| M00059 | V\$YY1_01  | 0.80111<br>4 | 362   | (-) | NNNNNCCATNTWNNNWN           | TCTGTAAAATGTTGTCA       |
| M00059 | V\$YY1_01  | 0.85550<br>5 | 414   | (+) | NNNNNCCATNTWNNNWN           | GAAGATCATTTCTGTAG       |
| M00069 | V\$YY1_02  | 0.85505<br>2 | 437   | (+) | NNNCGGCCATCTGNCTSNW         | TCGAGGCCATTTTTATTCCA    |
| M00059 | V\$YY1_01  | 0.88695<br>9 | 438   | (+) | NNNNNCCATNTWNNNWN           | CGAGGCCATTTTTATTC       |
| M00059 | V\$YY1_01  | 0.79456<br>1 | 449   | (+) | NNNNNCCATNTWNNNWN           | TTATTCCATGTAATTAG       |

|        |           |         |      |     |                   |                    |  |
|--------|-----------|---------|------|-----|-------------------|--------------------|--|
|        |           | 0.77457 |      |     |                   |                    |  |
| M00059 | V\$YY1_01 | 4       | 512  | (-) | NNNNNCCATNTWNNNWN | AGATATAAATGATTACT  |  |
|        |           | 0.79030 |      |     |                   |                    |  |
| M00059 | V\$YY1_01 | 1       | 566  | (-) | NNNNNCCATNTWNNNWN | ACAAATATATGAAAATA  |  |
|        |           | 0.78079 |      |     |                   |                    |  |
| M00059 | V\$YY1_01 | 9       | 600  | (-) | NNNNNCCATNTWNNNWN | TTATAAATATGTCITTTT |  |
| M00059 | V\$YY1_01 | 0.79194 | 616  | (-) | NNNNNCCATNTWNNNWN | TTTAACAAATGCAGGTA  |  |
|        |           | 0.83387 |      |     |                   |                    |  |
| M00059 | V\$YY1_01 | 9       | 706  | (+) | NNNNNCCATNTWNNNWN | AAATTTTCATGTATAATC |  |
|        |           | 0.86304 |      |     |                   |                    |  |
| M00059 | V\$YY1_01 | 1       | 742  | (+) | NNNNNCCATNTWNNNWN | GAAATGCATTTTTTCAG  |  |
|        |           | 0.81356 |      |     |                   |                    |  |
| M00059 | V\$YY1_01 | 5       | 849  | (+) | NNNNNCCATNTWNNNWN | CATCTTCATACAGTCAT  |  |
|        |           | 0.78047 |      |     |                   |                    |  |
| M00059 | V\$YY1_01 | 2       | 861  | (-) | NNNNNCCATNTWNNNWN | GTCATGTCATGGATATA  |  |
|        |           | 0.79783 |      |     |                   |                    |  |
| M00059 | V\$YY1_01 | 7       | 951  | (-) | NNNNNCCATNTWNNNWN | CACAAACAATGCTTTTC  |  |
|        |           | 0.81487 |      |     |                   |                    |  |
| M00059 | V\$YY1_01 | 5       | 998  | (+) | NNNNNCCATNTWNNNWN | TAAAGACATCTTTTAAA  |  |
|        |           | 0.78276 |      |     |                   |                    |  |
| M00059 | V\$YY1_01 | 5       | 1038 | (+) | NNNNNCCATNTWNNNWN | ATTTACCAGTTTITAGTT |  |
|        |           | 0.86304 |      |     |                   |                    |  |
| M00059 | V\$YY1_01 | 1       | 1105 | (+) | NNNNNCCATNTWNNNWN | TATTGTCATATTTTAAA  |  |
|        |           | 0.77719 |      |     |                   |                    |  |
| M00059 | V\$YY1_01 | 5       | 1296 | (-) | NNNNNCCATNTWNNNWN | GAAACTAAATGAATAAA  |  |
|        |           | 0.79030 |      |     |                   |                    |  |
| M00059 | V\$YY1_01 | 1       | 1821 | (+) | NNNNNCCATNTWNNNWN | TGGGTCCATTATAGGCT  |  |
|        |           | 0.81716 |      |     |                   |                    |  |
| M00059 | V\$YY1_01 | 9       | 1835 | (+) | NNNNNCCATNTWNNNWN | GCTTAACATATTTGTAA  |  |
|        |           | 0.83158 |      |     |                   |                    |  |
| M00059 | V\$YY1_01 | 6       | 1927 | (+) | NNNNNCCATNTWNNNWN | CAACACCATAGACAGCC  |  |
|        |           | 0.78014 |      |     |                   |                    |  |
| M00059 | V\$YY1_01 | 4       | 1980 | (-) | NNNNNCCATNTWNNNWN | CAAGAACACTGGAGTGG  |  |
|        |           | 0.78309 |      |     |                   |                    |  |
| M00059 | V\$YY1_01 | 3       | 1996 | (+) | NNNNNCCATNTWNNNWN | GGTTGCCATTTCCTTCT  |  |
|        |           | 0.80111 |      |     |                   |                    |  |
| M00059 | V\$YY1_01 | 4       | 2069 | (-) | NNNNNCCATNTWNNNWN | GCGACTCCATGGACTGC  |  |
|        |           | 0.78342 |      |     |                   |                    |  |
| M00059 | V\$YY1_01 | 1       | 2070 | (+) | NNNNNCCATNTWNNNWN | CGACTCCATGGACTGCA  |  |
| M00059 | V\$YY1_01 |         | 2100 | (-) | NNNNNCCATNTWNNNWN | CTCCATCCATGGGATTT  |  |
|        |           | 0.81323 |      |     |                   |                    |  |

|        |           |         |      |     |                      |                      |
|--------|-----------|---------|------|-----|----------------------|----------------------|
| M00059 | V\$YY1_01 | 0.78768 | 2190 | (+) | NNNNNCCATNTWNNNWN    | TGTATCCACTTTTGGA     |
|        |           | 0.80996 |      |     |                      |                      |
| M00059 | V\$YY1_01 | 1       | 2365 | (+) | NNNNNCCATNTWNNNWN    | CAAATTCAGTTATTAAT    |
|        |           | 0.81389 |      |     |                      |                      |
| M00059 | V\$YY1_01 | 3       | 2527 | (-) | NNNNNCCATNTWNNNWN    | TTTCTGAAATGCTGAGA    |
|        |           | 0.80635 |      |     |                      |                      |
| M00059 | V\$YY1_01 | 6       | 2719 | (+) | NNNNNCCATNTWNNNWN    | GTAGTCCATATCTTTTC    |
|        |           | 0.90629 |      |     |                      |                      |
| M00059 | V\$YY1_01 | 1       | 2799 | (+) | NNNNNCCATNTWNNNWN    | AAACATCATTTTTAAAT    |
|        |           | 0.78702 |      |     |                      |                      |
| M00059 | V\$YY1_01 | 5       | 2815 | (+) | NNNNNCCATNTWNNNWN    | TGCTAACATTTAACAAA    |
|        |           | 0.82732 |      |     |                      |                      |
| M00059 | V\$YY1_01 | 6       | 2849 | (-) | NNNNNCCATNTWNNNWN    | CAGTTAAAATGCAGATT    |
|        |           | 0.79521 |      |     |                      |                      |
| M00059 | V\$YY1_01 | 6       | 3202 | (+) | NNNNNCCATNTWNNNWN    | TCTCTCCAGTGAGTGTT    |
|        |           | 0.80078 |      |     |                      |                      |
| M00059 | V\$YY1_01 | 6       | 3317 | (+) | NNNNNCCATNTWNNNWN    | AACAGCCAGTTTCACAT    |
|        |           | 0.77543 |      |     |                      |                      |
| M00069 | V\$YY1_02 | 7       | 3394 | (-) | NNNCGGCCATCTTGNCTSNW | TTTAGAGAAGAGGGCATTG  |
|        |           | 0.83682 |      |     |                      |                      |
| M00059 | V\$YY1_01 | 8       | 3492 | (+) | NNNNNCCATNTWNNNWN    | TATTTTCATGTATTATT    |
|        |           | 0.79718 |      |     |                      |                      |
| M00059 | V\$YY1_01 | 2       | 3554 | (+) | NNNNNCCATNTWNNNWN    | GATCTCAATTTACACAC    |
|        |           | 0.85222 |      |     |                      |                      |
| M00059 | V\$YY1_01 | 8       | 3640 | (+) | NNNNNCCATNTWNNNWN    | TTAGTTCATTTTTTAAT    |
|        |           | 0.86926 |      |     |                      |                      |
| M00059 | V\$YY1_01 | 6       | 3755 | (+) | NNNNNCCATNTWNNNWN    | CATTTCATTTTCATT      |
|        |           | 0.80013 |      |     |                      |                      |
| M00059 | V\$YY1_01 | 1       | 3761 | (+) | NNNNNCCATNTWNNNWN    | CATTTTCATTGTATAC     |
|        |           | 0.80733 |      |     |                      |                      |
| M00059 | V\$YY1_01 | 9       | 3790 | (+) | NNNNNCCATNTWNNNWN    | TGTATCCAGGTACTCAG    |
| M00059 | V\$YY1_01 | 0.90924 | 3916 | (-) | NNNNNCCATNTWNNNWN    | AACCAAACATGGTGTCT    |
|        |           | 0.75312 |      |     |                      |                      |
| M00069 | V\$YY1_02 | 4       | 3916 | (+) | NNNCGGCCATCTTGNCTSNW | AACCAAACATGGTGTCTCCT |
|        |           | 0.85353 |      |     |                      |                      |
| M00059 | V\$YY1_01 | 9       | 4009 | (-) | NNNNNCCATNTWNNNWN    | CTAAATAAATGGAGAAT    |
|        |           | 0.79423 |      |     |                      |                      |
| M00059 | V\$YY1_01 | 3       | 4028 | (-) | NNNNNCCATNTWNNNWN    | GTGTTCAAATGGAAAAA    |

|        |           |         |      |     |                      |                      |  |
|--------|-----------|---------|------|-----|----------------------|----------------------|--|
|        |           | 0.77981 |      |     |                      |                      |  |
| M00059 | V\$YY1_01 | 7       | 4045 | (+) | NNNNNCCATNTWNNNWN    | CATTCTCCTTTTTTGAC    |  |
|        |           | 0.79685 |      |     |                      |                      |  |
| M00059 | V\$YY1_01 | 5       | 4093 | (-) | NNNNNCCATNTWNNNWN    | ATTCCTACAGGAAGTCC    |  |
|        |           | 0.78309 |      |     |                      |                      |  |
| M00059 | V\$YY1_01 | 3       | 4239 | (+) | NNNNNCCATNTWNNNWN    | TTTCTTCATTGCTCAC     |  |
|        |           | 0.82011 |      |     |                      |                      |  |
| M00059 | V\$YY1_01 | 8       | 4280 | (-) | NNNNNCCATNTWNNNWN    | AATTATATATGCAAATA    |  |
|        |           | 0.79259 |      |     |                      |                      |  |
| M00059 | V\$YY1_01 | 5       | 4391 | (+) | NNNNNCCATNTWNNNWN    | AATTTCCATTCTCATTA    |  |
| M00059 | V\$YY1_01 | 0.79751 | 4509 | (+) | NNNNNCCATNTWNNNWN    | CAAGACCAGTATTTAAA    |  |
|        |           | 0.78309 |      |     |                      |                      |  |
| M00059 | V\$YY1_01 | 3       | 4665 | (-) | NNNNNCCATNTWNNNWN    | TGTTATTTATGGTATTA    |  |
|        |           | 0.78964 |      |     |                      |                      |  |
| M00059 | V\$YY1_01 | 6       | 4856 | (+) | NNNNNCCATNTWNNNWN    | ACTGACCAGCTTAAATA    |  |
|        |           | 0.80111 |      |     |                      |                      |  |
| M00059 | V\$YY1_01 | 4       | 4896 | (-) | NNNNNCCATNTWNNNWN    | CGCAAGAAATGATATTG    |  |
|        |           | 0.78342 |      |     |                      |                      |  |
| M00059 | V\$YY1_01 | 1       | 4935 | (+) | NNNNNCCATNTWNNNWN    | AAAAAGCATATTTATTT    |  |
|        |           | 0.83650 |      |     |                      |                      |  |
| M00059 | V\$YY1_01 | 1       | 4992 | (+) | NNNNNCCATNTWNNNWN    | GATATCCATCCATTCAT    |  |
|        |           | 0.79718 |      |     |                      |                      |  |
| M00059 | V\$YY1_01 | 2       | 4996 | (+) | NNNNNCCATNTWNNNWN    | TCCATCCATTCATGTTT    |  |
|        |           | 0.78079 |      |     |                      |                      |  |
| M00059 | V\$YY1_01 | 9       | 5035 | (+) | NNNNNCCATNTWNNNWN    | GGAGAACATCAATGAAC    |  |
|        |           | 0.80078 |      |     |                      |                      |  |
| M00059 | V\$YY1_01 | 6       | 5038 | (-) | NNNNNCCATNTWNNNWN    | GAACATCAATGAACTGA    |  |
|        |           | 0.83912 |      |     |                      |                      |  |
| M00059 | V\$YY1_01 | 2       | 5065 | (-) | NNNNNCCATNTWNNNWN    | GAACATAAATGATATTT    |  |
|        |           | 0.84927 |      |     |                      |                      |  |
| M00059 | V\$YY1_01 | 9       | 5218 | (-) | NNNNNCCATNTWNNNWN    | GTCGAAAAATGCTTTGT    |  |
| M00059 | V\$YY1_01 | 0.82962 | 5242 | (+) | NNNNNCCATNTWNNNWN    | AAAAAACATTTTAGAAA    |  |
|        |           | 0.75258 |      |     |                      |                      |  |
| M00069 | V\$YY1_02 | 8       | 5291 | (-) | NNNCGGCCATCTTGNCSTNW | AACTTTCAAAATGACTGATG |  |
|        |           | 0.78735 |      |     |                      |                      |  |
| M00059 | V\$YY1_01 | 3       | 5293 | (-) | NNNNNCCATNTWNNNWN    | CTTTCAAAATGACTGAT    |  |
|        |           | 0.77686 |      |     |                      |                      |  |
| M00059 | V\$YY1_01 | 8       | 5325 | (-) | NNNNNCCATNTWNNNWN    | TTCTAAATATTGATTTC    |  |
|        |           | 0.79816 |      |     |                      |                      |  |
| M00059 | V\$YY1_01 | 5       | 5387 | (-) | NNNNNCCATNTWNNNWN    | ATGAATGAATGGATAAA    |  |

|        |           |         |      |     |                   |                    |  |
|--------|-----------|---------|------|-----|-------------------|--------------------|--|
|        |           | 0.86992 |      |     |                   |                    |  |
| M00059 | V\$YY1_01 | 1       | 5415 | (-) | NNNNNCCATNTWNNNWN | GTGCAATTATGGACTGA  |  |
|        |           | 0.77064 |      |     |                   |                    |  |
| M00059 | V\$YY1_01 | 2       | 5502 | (-) | NNNNNCCATNTWNNNWN | CTCCAAGAATGTTTTAC  |  |
|        |           | 0.78702 |      |     |                   |                    |  |
| M00059 | V\$YY1_01 | 5       | 5848 | (-) | NNNNNCCATNTWNNNWN | GATGCAACATGTATGTT  |  |
|        |           | 0.81454 |      |     |                   |                    |  |
| M00059 | V\$YY1_01 | 8       | 5940 | (-) | NNNNNCCATNTWNNNWN | GTACTGCTATGGTGATG  |  |
|        |           | 0.81585 |      |     |                   |                    |  |
| M00059 | V\$YY1_01 | 8       | 5953 | (-) | NNNNNCCATNTWNNNWN | GATGGAAACTGAACACA  |  |
|        |           | 0.81782 |      |     |                   |                    |  |
| M00059 | V\$YY1_01 | 4       | 5971 | (-) | NNNNNCCATNTWNNNWN | CAAACATCATGGAGAAA  |  |
|        |           | 0.81192 |      |     |                   |                    |  |
| M00059 | V\$YY1_01 | 7       | 5985 | (+) | NNNNNCCATNTWNNNWN | AAAATTCATTTTGCTTA  |  |
|        |           | 0.80668 |      |     |                   |                    |  |
| M00059 | V\$YY1_01 | 4       | 6155 | (+) | NNNNNCCATNTWNNNWN | TCAAAACATATAAAAAT  |  |
|        |           | 0.78342 |      |     |                   |                    |  |
| M00059 | V\$YY1_01 | 1       | 6191 | (-) | NNNNNCCATNTWNNNWN | GCTCTGAAATGCAGATT  |  |
|        |           | 0.77752 |      |     |                   |                    |  |
| M00059 | V\$YY1_01 | 3       | 6259 | (+) | NNNNNCCATNTWNNNWN | CCTTACCAGTTCTCTAT  |  |
|        |           | 0.78112 |      |     |                   |                    |  |
| M00059 | V\$YY1_01 | 7       | 6277 | (+) | NNNNNCCATNTWNNNWN | GCCACCCATTCTATTT   |  |
|        |           | 0.84764 |      |     |                   |                    |  |
| M00059 | V\$YY1_01 | 1       | 6299 | (+) | NNNNNCCATNTWNNNWN | GGCATCCATTTTATTTG  |  |
|        |           | 0.83912 |      |     |                   |                    |  |
| M00059 | V\$YY1_01 | 2       | 6318 | (+) | NNNNNCCATNTWNNNWN | AATTATCATTTTATATT  |  |
|        |           | 0.79882 |      |     |                   |                    |  |
| M00059 | V\$YY1_01 |         | 6385 | (+) | NNNNNCCATNTWNNNWN | TCAAGCCATGGAAGATG  |  |
|        |           | 0.79390 |      |     |                   |                    |  |
| M00059 | V\$YY1_01 | 6       | 6391 | (-) | NNNNNCCATNTWNNNWN | CATGGAAGATGCTAAGG  |  |
|        |           | 0.77883 |      |     |                   |                    |  |
| M00059 | V\$YY1_01 | 4       | 6626 | (-) | NNNNNCCATNTWNNNWN | AAAGCAAAATGTGCATG  |  |
|        |           | 0.92988 |      |     |                   |                    |  |
| M00059 | V\$YY1_01 | 2       | 6646 | (-) | NNNNNCCATNTWNNNWN | GTTTAAAAATGAACATC  |  |
|        |           | 0.86697 |      |     |                   |                    |  |
| M00059 | V\$YY1_01 | 2       | 6889 | (+) | NNNNNCCATNTWNNNWN | CATGTCCATTCAAGTCAG |  |
|        |           | 0.77817 |      |     |                   |                    |  |
| M00059 | V\$YY1_01 | 8       | 7065 | (+) | NNNNNCCATNTWNNNWN | TGACTTCCTGTAGTGAT  |  |
|        |           | 0.83256 |      |     |                   |                    |  |
| M00059 | V\$YY1_01 | 9       | 7127 | (+) | NNNNNCCATNTWNNNWN | GGAGTTCATCTTTCAGT  |  |
|        |           |         |      |     |                   |                    |  |
| M00059 | V\$YY1_01 |         | 7166 | (-) | NNNNNCCATNTWNNNWN | TACTGTTCATGGGGTTC  |  |
|        |           | 0.78112 |      |     |                   |                    |  |

|        |           |         |      |     |                   |                   |  |
|--------|-----------|---------|------|-----|-------------------|-------------------|--|
|        |           | 0.85255 |      |     |                   |                   |  |
| M00059 | V\$YY1_01 | 6       | 7210 | (+) | NNNNNCCATNTWNNNWN | CCATTCCATTCTCCAAT |  |
|        |           | 0.81684 |      |     |                   |                   |  |
| M00059 | V\$YY1_01 | 1       | 7244 | (-) | NNNNNCCATNTWNNNWN | CTCAAAACATGAAAAAA |  |
|        |           | 0.78931 |      |     |                   |                   |  |
| M00059 | V\$YY1_01 | 8       | 7312 | (+) | NNNNNCCATNTWNNNWN | TTGCTGCATATTAGAAT |  |
|        |           | 0.78047 |      |     |                   |                   |  |
| M00059 | V\$YY1_01 | 2       | 7333 | (-) | NNNNNCCATNTWNNNWN | ATCTTAGTATGTACTTG |  |
|        |           | 0.83551 |      |     |                   |                   |  |
| M00059 | V\$YY1_01 | 8       | 7361 | (+) | NNNNNCCATNTWNNNWN | CAGATCCATATGTAAAT |  |
|        |           | 0.89351 |      |     |                   |                   |  |
| M00059 | V\$YY1_01 | 2       | 7370 | (-) | NNNNNCCATNTWNNNWN | ATGTAAATATGAACATC |  |
|        |           | 0.80471 |      |     |                   |                   |  |
| M00059 | V\$YY1_01 | 8       | 7377 | (+) | NNNNNCCATNTWNNNWN | TATGAACATCTATGACT |  |
|        |           | 0.85550 |      |     |                   |                   |  |
| M00059 | V\$YY1_01 | 5       | 7449 | (+) | NNNNNCCATNTWNNNWN | TAGTTCATTCTGAAAT  |  |
|        |           | 0.86304 |      |     |                   |                   |  |
| M00059 | V\$YY1_01 | 1       | 7475 | (+) | NNNNNCCATNTWNNNWN | TATTTTCATATTTCCAA |  |
|        |           | 0.82011 |      |     |                   |                   |  |
| M00059 | V\$YY1_01 | 8       | 7577 | (+) | NNNNNCCATNTWNNNWN | TCATTCCAGGTTTCATT |  |
|        |           | 0.78243 |      |     |                   |                   |  |
| M00059 | V\$YY1_01 | 8       | 7698 | (+) | NNNNNCCATNTWNNNWN | CTCCAACATATTTTAAA |  |
|        |           | 0.79357 |      |     |                   |                   |  |
| M00059 | V\$YY1_01 | 8       | 7797 | (+) | NNNNNCCATNTWNNNWN | GCAATCCAGTATGAAAG |  |
|        |           | 0.78505 |      |     |                   |                   |  |
| M00059 | V\$YY1_01 | 9       | 7799 | (-) | NNNNNCCATNTWNNNWN | AATCCAGTATGAAAGTG |  |
|        |           | 0.79587 |      |     |                   |                   |  |
| M00059 | V\$YY1_01 | 2       | 7853 | (-) | NNNNNCCATNTWNNNWN | CAGTAACAATGATTCTC |  |
|        |           | 0.79849 |      |     |                   |                   |  |
| M00059 | V\$YY1_01 | 3       | 7882 | (-) | NNNNNCCATNTWNNNWN | AATGAAAGCTGGAAGCA |  |
|        |           | 0.79488 |      |     |                   |                   |  |
| M00059 | V\$YY1_01 | 9       | 7913 | (+) | NNNNNCCATNTWNNNWN | GTATGCCATTTTATGT  |  |
|        |           | 0.84338 |      |     |                   |                   |  |
| M00059 | V\$YY1_01 | 1       | 7945 | (-) | NNNNNCCATNTWNNNWN | ATTAGAAAATGTTTATG |  |
|        |           | 0.84633 |      |     |                   |                   |  |
| M00059 | V\$YY1_01 |         | 8126 | (-) | NNNNNCCATNTWNNNWN | AATCCTATCTGGATATC |  |
|        |           | 0.86599 |      |     |                   |                   |  |
| M00059 | V\$YY1_01 |         | 8149 | (-) | NNNNNCCATNTWNNNWN | ATCCAAACATGATTTTT |  |
|        |           | 0.81323 |      |     |                   |                   |  |
| M00059 | V\$YY1_01 | 7       | 8220 | (-) | NNNNNCCATNTWNNNWN | TTACAATAATGGCTATG |  |

|        |           |         |       |     |                      |                      |
|--------|-----------|---------|-------|-----|----------------------|----------------------|
|        |           | 0.77031 |       |     |                      |                      |
| M00059 | V\$YY1_01 | 5       | 8410  | (+) | NNNNNCCATNTWNNNWN    | TAAACCCAGTTCCAATG    |
| M00059 | V\$YY1_01 | 0.79194 | 8501  | (-) | NNNNNCCATNTWNNNWN    | AAGAGAACATGTACTTT    |
|        |           | 0.80832 |       |     |                      |                      |
| M00059 | V\$YY1_01 | 2       | 8558  | (+) | NNNNNCCATNTWNNNWN    | TAAAATCAGTTTACCAC    |
| M00059 | V\$YY1_01 | 0.77228 | 8576  | (-) | NNNNNCCATNTWNNNWN    | GATAAGCTATGATGTGT    |
|        |           | 0.78342 |       |     |                      |                      |
| M00059 | V\$YY1_01 | 1       | 8643  | (+) | NNNNNCCATNTWNNNWN    | ACAATACATTTTTTTTT    |
|        |           | 0.80242 |       |     |                      |                      |
| M00059 | V\$YY1_01 | 5       | 8721  | (+) | NNNNNCCATNTWNNNWN    | TAACATCATCCAGGATA    |
|        |           | 0.80963 |       |     |                      |                      |
| M00059 | V\$YY1_01 | 3       | 8788  | (-) | NNNNNCCATNTWNNNWN    | CATTCAAAAGGAAGATG    |
|        |           | 0.79783 |       |     |                      |                      |
| M00059 | V\$YY1_01 | 7       | 8880  | (-) | NNNNNCCATNTWNNNWN    | GAGCAAGAATGTTGTGT    |
|        |           | 0.81258 |       |     |                      |                      |
| M00059 | V\$YY1_01 | 2       | 9080  | (-) | NNNNNCCATNTWNNNWN    | GTATTGAAATGGCACGC    |
|        |           | 0.78473 |       |     |                      |                      |
| M00059 | V\$YY1_01 | 1       | 9203  | (-) | NNNNNCCATNTWNNNWN    | GTGACAAAATAGTAATA    |
|        |           | 0.81487 |       |     |                      |                      |
| M00059 | V\$YY1_01 | 5       | 9274  | (-) | NNNNNCCATNTWNNNWN    | CTCGGTAAATGTGGCTA    |
|        |           | 0.85910 |       |     |                      |                      |
| M00059 | V\$YY1_01 | 9       | 9298  | (+) | NNNNNCCATNTWNNNWN    | AAACATCATTTTTTCCC    |
|        |           | 0.76722 |       |     |                      |                      |
| M00069 | V\$YY1_02 | 6       | 9347  | (-) | NNNCGGCCATCTTGNCTSNW | CAGAAAACAAATGGTGCTAG |
| M00059 | V\$YY1_01 | 0.83945 | 9349  | (-) | NNNNNCCATNTWNNNWN    | GAAAACAAATGGTGCTA    |
|        |           | 0.85910 |       |     |                      |                      |
| M00059 | V\$YY1_01 | 9       | 9473  | (+) | NNNNNCCATNTWNNNWN    | GAATTCCATAGACAAAG    |
|        |           | 0.78342 |       |     |                      |                      |
| M00059 | V\$YY1_01 | 1       | 9503  | (+) | NNNNNCCATNTWNNNWN    | TATATCCATAGGATCAC    |
| M00059 | V\$YY1_01 | 0.87287 | 9726  | (+) | NNNNNCCATNTWNNNWN    | CATGTCCATTCACTGAT    |
|        |           | 0.81061 |       |     |                      |                      |
| M00059 | V\$YY1_01 | 6       | 10091 | (+) | NNNNNCCATNTWNNNWN    | GGATACCATGATAGATG    |
|        |           | 0.81078 |       |     |                      |                      |
| M00069 | V\$YY1_02 | 2       | 10095 | (-) | NNNCGGCCATCTTGNCTSNW | ACCATGATAGATGGTATCCA |
|        |           | 0.88532 |       |     |                      |                      |
| M00059 | V\$YY1_01 | 1       | 10097 | (-) | NNNNNCCATNTWNNNWN    | CATGATAGATGGTATCC    |
|        |           | 0.80209 |       |     |                      |                      |
| M00059 | V\$YY1_01 | 7       | 10138 | (-) | NNNNNCCATNTWNNNWN    | CTTTGAATAGGAACAGC    |
| M00059 | V\$YY1_01 |         | 10272 | (+) | NNNNNCCATNTWNNNWN    | TCAAATCATGTTAGAGC    |
|        |           | 0.81487 |       |     |                      |                      |

|        |           |         |       |                   |                      |                     |  |
|--------|-----------|---------|-------|-------------------|----------------------|---------------------|--|
|        |           | 5       |       |                   |                      |                     |  |
|        |           | 0.78800 |       |                   |                      |                     |  |
| M00059 | V\$YY1_01 | 8       | 10338 | (+)               | NNNNNCCATNTWNNNWN    | CAAATCCAGTTCTGAGT   |  |
|        |           | 0.87188 |       |                   |                      |                     |  |
| M00059 | V\$YY1_01 | 7       | 10407 | (+)               | NNNNNCCATNTWNNNWN    | ACATTCCATTAAAAAA    |  |
|        |           | 0.79849 |       |                   |                      |                     |  |
| M00059 | V\$YY1_01 | 3       | 10451 | (+)               | NNNNNCCATNTWNNNWN    | GGATCCCATACATTCAA   |  |
|        |           | 0.78866 |       |                   |                      |                     |  |
| M00059 | V\$YY1_01 | 3       | 10804 | (-)               | NNNNNCCATNTWNNNWN    | AATAATACATGTTTTT    |  |
|        |           | 0.83256 |       |                   |                      |                     |  |
| M00059 | V\$YY1_01 | 9       | 10909 | (-)               | NNNNNCCATNTWNNNWN    | TTTGAACATGAAGTCA    |  |
|        |           | 0.83387 |       |                   |                      |                     |  |
| M00059 | V\$YY1_01 | 9       | 10937 | (-)               | NNNNNCCATNTWNNNWN    | CTGATAGTATGGATAGA   |  |
|        |           | 0.78407 |       |                   |                      |                     |  |
| M00059 | V\$YY1_01 | 6       | 11031 | (+)               | NNNNNCCATNTWNNNWN    | GGAGGCCATAAATTTTT   |  |
|        |           | 0.82175 |       |                   |                      |                     |  |
| M00059 | V\$YY1_01 | 6       | 11116 | (+)               | NNNNNCCATNTWNNNWN    | AAATTACATTTTCACAT   |  |
|        |           | 0.78211 |       |                   |                      |                     |  |
| M00059 | V\$YY1_01 | 11164   | (-)   | NNNNNCCATNTWNNNWN | AGTCAATAATGAATTTA    |                     |  |
|        |           | 0.81094 |       |                   |                      |                     |  |
| M00059 | V\$YY1_01 | 4       | 11334 | (-)               | NNNNNCCATNTWNNNWN    | GTTATGATATGATTAGG   |  |
|        |           | 0.81815 |       |                   |                      |                     |  |
| M00059 | V\$YY1_01 | 2       | 11371 | (-)               | NNNNNCCATNTWNNNWN    | AGAACTATATGGTCCTG   |  |
|        |           | 0.78473 |       |                   |                      |                     |  |
| M00059 | V\$YY1_01 | 1       | 11396 | (+)               | NNNNNCCATNTWNNNWN    | GTTCATCATTCATAGTG   |  |
|        |           | 0.78668 |       |                   |                      |                     |  |
| M00069 | V\$YY1_02 | 3       | 11441 | (-)               | NNNCGGCCATCTTGNCTSNW | TATTCATAGATGGTCCCTA |  |
|        |           | 0.87385 |       |                   |                      |                     |  |
| M00059 | V\$YY1_01 | 3       | 11443 | (-)               | NNNNNCCATNTWNNNWN    | TTTCATAGATGGTCCCT   |  |
|        |           | 0.77686 |       |                   |                      |                     |  |
| M00059 | V\$YY1_01 | 8       | 11456 | (+)               | NNNNNCCATNTWNNNWN    | CCCTAGCATTTAGCATA   |  |
|        |           | 0.87090 |       |                   |                      |                     |  |
| M00059 | V\$YY1_01 | 4       | 11574 | (+)               | NNNNNCCATNTWNNNWN    | CATGACCATATAAGACT   |  |
|        |           | 0.77162 |       |                   |                      |                     |  |
| M00059 | V\$YY1_01 | 5       | 11584 | (+)               | NNNNNCCATNTWNNNWN    | TAAGACTATTTACTAAA   |  |
|        |           | 0.85550 |       |                   |                      |                     |  |
| M00059 | V\$YY1_01 | 5       | 11702 | (+)               | NNNNNCCATNTWNNNWN    | ACTACCCATATTTGATA   |  |
|        |           | 0.80275 |       |                   |                      |                     |  |
| M00059 | V\$YY1_01 | 2       | 11741 | (-)               | NNNNNCCATNTWNNNWN    | AAGATAAAATGTAAATG   |  |
|        |           | 0.77260 |       |                   |                      |                     |  |
| M00059 | V\$YY1_01 | 8       | 11817 | (-)               | NNNNNCCATNTWNNNWN    | CCCCAGATATGAAACTT   |  |



|        |           |         |       |     |                   |                   |  |
|--------|-----------|---------|-------|-----|-------------------|-------------------|--|
|        |           | 0.84731 |       |     |                   |                   |  |
| M00059 | V\$YY1_01 | 3       | 11896 | (-) | NNNNNCCATNTWNNNWN | GTTAGAAAATGAAAGCT |  |
|        |           | 0.80832 |       |     |                   |                   |  |
| M00059 | V\$YY1_01 | 2       | 11958 | (+) | NNNNNCCATNTWNNNWN | AATCTTCATAGATGATA |  |
|        |           | 0.80078 |       |     |                   |                   |  |
| M00059 | V\$YY1_01 | 6       | 11961 | (-) | NNNNNCCATNTWNNNWN | CTTCATAGATGATATAT |  |
|        |           | 0.84534 |       |     |                   |                   |  |
| M00059 | V\$YY1_01 | 7       | 11986 | (-) | NNNNNCCATNTWNNNWN | ATTGTAAAATGAATGTG |  |
|        |           | 0.77031 |       |     |                   |                   |  |
| M00059 | V\$YY1_01 | 5       | 12028 | (+) | NNNNNCCATNTWNNNWN | CTAGAACATATTTCTT  |  |
|        |           | 0.81487 |       |     |                   |                   |  |
| M00059 | V\$YY1_01 | 5       | 12056 | (+) | NNNNNCCATNTWNNNWN | CAACTTCATAGTATGAA |  |
|        |           | 0.79521 |       |     |                   |                   |  |
| M00059 | V\$YY1_01 | 6       | 12067 | (-) | NNNNNCCATNTWNNNWN | TATGAAAGAGGGAAACC |  |
|        |           | 0.79619 |       |     |                   |                   |  |
| M00059 | V\$YY1_01 | 9       | 12086 | (+) | NNNNNCCATNTWNNNWN | GCCCACCAGGTAATATT |  |
|        |           | 0.81454 |       |     |                   |                   |  |
| M00059 | V\$YY1_01 | 8       | 12102 | (-) | NNNNNCCATNTWNNNWN | TTTGCTAAATGAATTAC |  |
|        |           | 0.81061 |       |     |                   |                   |  |
| M00059 | V\$YY1_01 | 6       | 12114 | (-) | NNNNNCCATNTWNNNWN | ATTACATAATGATAATA |  |
|        |           | 0.81684 |       |     |                   |                   |  |
| M00059 | V\$YY1_01 | 1       | 12140 | (-) | NNNNNCCATNTWNNNWN | GTTTAAATATGTTTGCT |  |
|        |           | 0.85222 |       |     |                   |                   |  |
| M00059 | V\$YY1_01 | 8       | 12430 | (+) | NNNNNCCATNTWNNNWN | TATGTCCATGATTTGAT |  |
|        |           | 0.85124 |       |     |                   |                   |  |
| M00059 | V\$YY1_01 | 5       | 12501 | (+) | NNNNNCCATNTWNNNWN | GCAAGCCATTTGGAGAT |  |
|        |           | 0.82208 |       |     |                   |                   |  |
| M00059 | V\$YY1_01 | 4       | 12546 | (-) | NNNNNCCATNTWNNNWN | GAAACTATCTGGAGAGA |  |
|        |           | 0.80242 |       |     |                   |                   |  |
| M00059 | V\$YY1_01 | 5       | 12561 | (-) | NNNNNCCATNTWNNNWN | GATAGTAAATGTTTCTG |  |
|        |           | 0.78178 |       |     |                   |                   |  |
| M00059 | V\$YY1_01 | 2       | 12603 | (+) | NNNNNCCATNTWNNNWN | CCCTTCATCTGTATAG  |  |
|        |           | 0.83781 |       |     |                   |                   |  |
| M00059 | V\$YY1_01 | 1       | 12662 | (+) | NNNNNCCATNTWNNNWN | GCATTCCATTGATTAG  |  |
|        |           | 0.84436 |       |     |                   |                   |  |
| M00059 | V\$YY1_01 | 4       | 12697 | (+) | NNNNNCCATNTWNNNWN | TGATTTCATTTTAAGG  |  |
|        |           | 0.81192 |       |     |                   |                   |  |
| M00059 | V\$YY1_01 | 7       | 12715 | (+) | NNNNNCCATNTWNNNWN | GACAACCAGATACTGTG |  |
|        |           | 0.77293 |       |     |                   |                   |  |
| M00059 | V\$YY1_01 | 6       | 12728 | (-) | NNNNNCCATNTWNNNWN | TGTGAAATATGTGCTGC |  |

|        |           |         |       |     |                     |                      |  |
|--------|-----------|---------|-------|-----|---------------------|----------------------|--|
|        |           | 0.83322 |       |     |                     |                      |  |
| M00059 | V\$YY1_01 | 4       | 12791 | (+) | NNNNNCCATNTWNNNWN   | TACTGTCATTTAACGAG    |  |
|        |           | 0.78047 |       |     |                     |                      |  |
| M00059 | V\$YY1_01 | 2       | 12911 | (+) | NNNNNCCATNTWNNNWN   | GCAAAGCATTTCAAAAA    |  |
|        |           | 0.81520 |       |     |                     |                      |  |
| M00059 | V\$YY1_01 | 3       | 13143 | (-) | NNNNNCCATNTWNNNWN   | GTTGTTGACTGGTGTG     |  |
|        |           | 0.82503 |       |     |                     |                      |  |
| M00059 | V\$YY1_01 | 3       | 13236 | (+) | NNNNNCCATNTWNNNWN   | TATGGCCATCCCTGAAT    |  |
|        |           | 0.84600 |       |     |                     |                      |  |
| M00059 | V\$YY1_01 | 3       | 13243 | (-) | NNNNNCCATNTWNNNWN   | ATCCCTGAATGAAGAGA    |  |
|        |           | 0.78833 |       |     |                     |                      |  |
| M00059 | V\$YY1_01 | 6       | 13436 | (-) | NNNNNCCATNTWNNNWN   | AAATTAATATGAATCTA    |  |
|        |           | 0.85255 |       |     |                     |                      |  |
| M00059 | V\$YY1_01 | 6       | 13507 | (+) | NNNNNCCATNTWNNNWN   | TGTCTTCAGTTTTAAAG    |  |
| M00059 | V\$YY1_01 | 0.79882 | 13551 | (+) | NNNNNCCATNTWNNNWN   | TTGGTCCATTGATGGTT    |  |
|        |           | 0.78374 |       |     |                     |                      |  |
| M00059 | V\$YY1_01 | 8       | 13569 | (+) | NNNNNCCATNTWNNNWN   | AACTTACATATAGTATG    |  |
|        |           | 0.77326 |       |     |                     |                      |  |
| M00059 | V\$YY1_01 | 3       | 13611 | (-) | NNNNNCCATNTWNNNWN   | AGAAGACCATGGAGTTT    |  |
|        |           | 0.75705 |       |     |                     |                      |  |
| M00069 | V\$YY1_02 | 1       | 13611 | (+) | NNNCGGCCATCTGNCTSNW | AGAAGACCATGGAGTTTTAT |  |
|        |           | 0.80602 |       |     |                     |                      |  |
| M00059 | V\$YY1_01 | 9       | 13612 | (+) | NNNNNCCATNTWNNNWN   | GAAGACCATGGAGTTTT    |  |
|        |           | 0.81323 |       |     |                     |                      |  |
| M00059 | V\$YY1_01 | 7       | 13627 | (-) | NNNNNCCATNTWNNNWN   | TTATAAATATGAATCTG    |  |
|        |           | 0.79521 |       |     |                     |                      |  |
| M00059 | V\$YY1_01 | 6       | 13694 | (+) | NNNNNCCATNTWNNNWN   | GATAATCATTCCCTTAAT   |  |
|        |           | 0.80996 |       |     |                     |                      |  |
| M00059 | V\$YY1_01 | 1       | 13830 | (+) | NNNNNCCATNTWNNNWN   | CCTTTCCATGTAATTTT    |  |
|        |           | 0.79095 |       |     |                     |                      |  |
| M00059 | V\$YY1_01 | 7       | 13847 | (-) | NNNNNCCATNTWNNNWN   | TTAAAAAGAGGGTAATC    |  |
|        |           | 0.79619 |       |     |                     |                      |  |
| M00059 | V\$YY1_01 | 9       | 14038 | (+) | NNNNNCCATNTWNNNWN   | AGATATCATATTTATTA    |  |
|        |           | 0.82732 |       |     |                     |                      |  |
| M00059 | V\$YY1_01 | 6       | 14110 | (+) | NNNNNCCATNTWNNNWN   | TAATTCATCAAAGAAC     |  |
| M00059 | V\$YY1_01 | 0.79882 | 14120 | (+) | NNNNNCCATNTWNNNWN   | AAAGAACATATATTTTC    |  |
|        |           | 0.78964 |       |     |                     |                      |  |
| M00059 | V\$YY1_01 | 6       | 14153 | (+) | NNNNNCCATNTWNNNWN   | GAATTACATTAATGCAC    |  |
|        |           | 0.79587 |       |     |                     |                      |  |
| M00059 | V\$YY1_01 | 2       | 14181 | (+) | NNNNNCCATNTWNNNWN   | AAAGGCCATGATAGATT    |  |

|        |           |         |       |     |                     |                      |  |
|--------|-----------|---------|-------|-----|---------------------|----------------------|--|
|        |           | 0.82437 |       |     |                     |                      |  |
| M00059 | V\$YY1_01 | 7       | 14228 | (-) | NNNNNCCATNTWNNNWN   | AAGAAATAATGGTTTTG    |  |
|        |           | 0.79619 |       |     |                     |                      |  |
| M00059 | V\$YY1_01 | 9       | 14309 | (+) | NNNNNCCATNTWNNNWN   | TCTGGCATTCTGAAA      |  |
|        |           | 0.80176 |       |     |                     |                      |  |
| M00059 | V\$YY1_01 | 9       | 14322 | (+) | NNNNNCCATNTWNNNWN   | GAAATCCCTGTATTATT    |  |
|        |           | 0.85714 |       |     |                     |                      |  |
| M00059 | V\$YY1_01 | 3       | 14406 | (-) | NNNNNCCATNTWNNNWN   | AGGCAAAAATGACCTTC    |  |
|        |           | 0.81520 |       |     |                     |                      |  |
| M00059 | V\$YY1_01 | 3       | 14493 | (-) | NNNNNCCATNTWNNNWN   | TTTGATAGCTGGACCTG    |  |
|        |           | 0.79456 |       |     |                     |                      |  |
| M00059 | V\$YY1_01 | 1       | 14533 | (-) | NNNNNCCATNTWNNNWN   | GTTCAATACTGGCTATT    |  |
|        |           | 0.84370 |       |     |                     |                      |  |
| M00059 | V\$YY1_01 | 9       | 14690 | (+) | NNNNNCCATNTWNNNWN   | AATAGCCATGTCTGAAA    |  |
| M00059 | V\$YY1_01 | 0.79325 | 14715 | (+) | NNNNNCCATNTWNNNWN   | ATGATTCATTTTCAGAG    |  |
|        |           | 0.81618 |       |     |                     |                      |  |
| M00059 | V\$YY1_01 | 6       | 14732 | (-) | NNNNNCCATNTWNNNWN   | ATTCAAACTGATTCT      |  |
|        |           | 0.85517 |       |     |                     |                      |  |
| M00059 | V\$YY1_01 | 7       | 14761 | (-) | NNNNNCCATNTWNNNWN   | CTTTTCAATGGTCTTT     |  |
|        |           | 0.76704 |       |     |                     |                      |  |
| M00069 | V\$YY1_02 | 7       | 14797 | (+) | NNNCGGCCATCTGNCTSNW | ATTCTACCAGCTGGACGCCT |  |
|        |           | 0.79030 |       |     |                     |                      |  |
| M00059 | V\$YY1_01 | 1       | 14814 | (+) | NNNNNCCATNTWNNNWN   | CCTATCCATCTGGTGCC    |  |
|        |           | 0.78964 |       |     |                     |                      |  |
| M00059 | V\$YY1_01 | 6       | 14868 | (+) | NNNNNCCATNTWNNNWN   | CCCCCTCATTCTCTGAC    |  |
| M00059 | V\$YY1_01 | 0.78637 | 14942 | (+) | NNNNNCCATNTWNNNWN   | TAAGTTCATTAAATGA     |  |
|        |           | 0.79357 |       |     |                     |                      |  |
| M00059 | V\$YY1_01 | 8       | 14956 | (+) | NNNNNCCATNTWNNNWN   | TGACTGCATATTGCTGC    |  |
|        |           | 0.80242 |       |     |                     |                      |  |
| M00059 | V\$YY1_01 | 5       | 15061 | (-) | NNNNNCCATNTWNNNWN   | TTTCTGAAATGGAAAAT    |  |
|        |           | 0.77457 |       |     |                     |                      |  |
| M00059 | V\$YY1_01 | 4       | 15090 | (-) | NNNNNCCATNTWNNNWN   | TCTGATATATGGCTAAT    |  |
|        |           | 0.82142 |       |     |                     |                      |  |
| M00059 | V\$YY1_01 | 9       | 15239 | (-) | NNNNNCCATNTWNNNWN   | ATCTTTAAATGCCTTTC    |  |
|        |           | 0.81028 |       |     |                     |                      |  |
| M00059 | V\$YY1_01 | 8       | 15301 | (+) | NNNNNCCATNTWNNNWN   | AAACTGCAGATTTTGAC    |  |
|        |           | 0.77162 |       |     |                     |                      |  |
| M00059 | V\$YY1_01 | 5       | 15371 | (-) | NNNNNCCATNTWNNNWN   | ATAATATAATGATGTTT    |  |
| M00059 | V\$YY1_01 | 0.85059 | 15450 | (+) | NNNNNCCATNTWNNNWN   | AGTGCTCATTTTTGAT     |  |

|        |           |         |       |     |                      |                      |  |
|--------|-----------|---------|-------|-----|----------------------|----------------------|--|
|        |           | 0.79062 |       |     |                      |                      |  |
| M00059 | V\$YY1_01 | 9       | 15552 | (-) | NNNNNCCATNTWNNNWN    | CCACAATTATGGTCTTT    |  |
| M00059 | V\$YY1_01 | 0.79194 | 15599 | (-) | NNNNNCCATNTWNNNWN    | CTTTTCATATGAATACA    |  |
|        |           | 0.79587 |       |     |                      |                      |  |
| M00059 | V\$YY1_01 | 2       | 15713 | (+) | NNNNNCCATNTWNNNWN    | CTTCAACATTTTTTGTA    |  |
|        |           | 0.78047 |       |     |                      |                      |  |
| M00059 | V\$YY1_01 | 2       | 15830 | (-) | NNNNNCCATNTWNNNWN    | TACTAATTCTGGTGACC    |  |
|        |           | 0.79062 |       |     |                      |                      |  |
| M00059 | V\$YY1_01 | 9       | 15948 | (+) | NNNNNCCATNTWNNNWN    | AATGTCCATAGATGTGT    |  |
|        |           | 0.79914 |       |     |                      |                      |  |
| M00059 | V\$YY1_01 | 8       | 15951 | (-) | NNNNNCCATNTWNNNWN    | GTCCATAGATGTGTTTT    |  |
|        |           | 0.83453 |       |     |                      |                      |  |
| M00059 | V\$YY1_01 | 5       | 16111 | (+) | NNNNNCCATNTWNNNWN    | TTTGGCCATATTTTCTG    |  |
|        |           | 0.87975 |       |     |                      |                      |  |
| M00059 | V\$YY1_01 | 1       | 16230 | (+) | NNNNNCCATNTWNNNWN    | GAACTTCATCTTAAGAT    |  |
|        |           | 0.86304 |       |     |                      |                      |  |
| M00059 | V\$YY1_01 | 1       | 16237 | (-) | NNNNNCCATNTWNNNWN    | ATCTTAAGATGAAGAGA    |  |
|        |           | 0.82241 |       |     |                      |                      |  |
| M00059 | V\$YY1_01 | 2       | 16248 | (-) | NNNNNCCATNTWNNNWN    | AAGAGAAAATGACTATT    |  |
|        |           | 0.82568 |       |     |                      |                      |  |
| M00059 | V\$YY1_01 | 8       | 16313 | (+) | NNNNNCCATNTWNNNWN    | TAACTACATATTTCTTT    |  |
|        |           | 0.80733 |       |     |                      |                      |  |
| M00059 | V\$YY1_01 | 9       | 16334 | (-) | NNNNNCCATNTWNNNWN    | ATTACAGATGGGATTG     |  |
|        |           | 0.77195 |       |     |                      |                      |  |
| M00059 | V\$YY1_01 | 3       | 16352 | (+) | NNNNNCCATNTWNNNWN    | AAATTCCATGCTCTACA    |  |
|        |           | 0.77064 |       |     |                      |                      |  |
| M00059 | V\$YY1_01 | 2       | 16361 | (+) | NNNNNCCATNTWNNNWN    | GCTCTACATGCTTTTC     |  |
|        |           | 0.83289 |       |     |                      |                      |  |
| M00059 | V\$YY1_01 | 6       | 16371 | (+) | NNNNNCCATNTWNNNWN    | TCTTTTCATCTATCATG    |  |
|        |           | 0.78178 |       |     |                      |                      |  |
| M00059 | V\$YY1_01 | 2       | 16388 | (+) | NNNNNCCATNTWNNNWN    | TCAAACCATTCTATCCA    |  |
|        |           | 0.83748 |       |     |                      |                      |  |
| M00059 | V\$YY1_01 | 4       | 16597 | (-) | NNNNNCCATNTWNNNWN    | ATTCTATATGGAAAAT     |  |
|        |           | 0.82241 |       |     |                      |                      |  |
| M00059 | V\$YY1_01 | 2       | 16604 | (-) | NNNNNCCATNTWNNNWN    | TATGGAAAATGTTTTTA    |  |
|        |           | 0.78561 |       |     |                      |                      |  |
| M00069 | V\$YY1_02 | 2       | 16644 | (+) | NNNCGGCCATCTTGNCTSNW | TAAGTGCCATCATTTCAAAT |  |
|        |           | 0.79292 |       |     |                      |                      |  |
| M00059 | V\$YY1_01 | 3       | 16648 | (+) | NNNNNCCATNTWNNNWN    | TGCCATCATTTCAAATA    |  |
|        |           |         |       |     |                      |                      |  |
| M00059 | V\$YY1_01 |         | 16707 | (+) | NNNNNCCATNTWNNNWN    | AAATTACATTTTAAGGC    |  |
|        |           | 0.79128 |       |     |                      |                      |  |

CSN1S2 *Ovis Aries*

|       |            |        |     |     |                 |                  |
|-------|------------|--------|-----|-----|-----------------|------------------|
| M0021 |            | 0.7795 |     |     |                 |                  |
| 6     | V\$TATA_C  | 09     | 120 | (+) | NCTATAAAAR      | TTTTTTAAAG       |
| M0025 |            | 0.7782 |     |     |                 |                  |
| 2     | V\$TATA_01 | 29     | 120 | (+) | STATAAAWRNNNNNN | TTTTTTAAAGAACT   |
| M0021 |            | 0.7681 |     |     |                 |                  |
| 6     | V\$TATA_C  | 54     | 121 | (+) | NCTATAAAAR      | TTTTTAAAGA       |
| M0021 |            | 0.7890 |     |     |                 |                  |
| 6     | V\$TATA_C  | 15     | 146 | (+) | NCTATAAAAR      | ACCTTAAGAT       |
| M0021 |            | 0.7441 |     |     |                 |                  |
| 6     | V\$TATA_C  | 25     | 177 | (+) | NCTATAAAAR      | GCTAACAAAG       |
| M0021 |            | 0.8626 |     |     |                 |                  |
| 6     | V\$TATA_C  | 88     | 213 | (+) | NCTATAAAAR      | TTCTTAAAAA       |
| M0021 |            | 0.8410 |     |     |                 |                  |
| 6     | V\$TATA_C  | 35     | 214 | (+) | NCTATAAAAR      | TCTTAAAAAA       |
| M0021 |            | 0.7932 |     |     |                 |                  |
| 6     | V\$TATA_C  | 4      | 215 | (+) | NCTATAAAAR      | CTTAAAAAAA       |
| M0025 |            | 0.7751 |     |     |                 |                  |
| 2     | V\$TATA_01 | 84     | 282 | (+) | STATAAAWRNNNNNN | GTTTAAAGGATGAGC  |
| M0021 |            | 0.7681 |     |     |                 |                  |
| 6     | V\$TATA_C  | 54     | 311 | (+) | NCTATAAAAR      | TTTTTGAAAA       |
| M0021 |            | 0.7507 |     |     |                 |                  |
| 6     | V\$TATA_C  | 26     | 312 | (+) | NCTATAAAAR      | TTTTGAAAAT       |
| M0025 |            | 0.7777 |     |     |                 |                  |
| 2     | V\$TATA_01 | 21     | 312 | (+) | STATAAAWRNNNNNN | TTTTGAAAATCCAGG  |
| M0021 |            | 0.7531 |     |     |                 |                  |
| 6     | V\$TATA_C  | 03     | 505 | (+) | NCTATAAAAR      | AAGATAAAAA       |
| M0025 |            |        |     |     |                 |                  |
| 2     | V\$TATA_01 | 0.8102 | 506 | (+) | STATAAAWRNNNNNN | AGATAAAAAACATTTA |
| M0025 |            | 0.7769 |     |     |                 |                  |
| 2     | V\$TATA_01 | 6      | 518 | (+) | STATAAAWRNNNNNN | TTATTTAACTCTCAG  |
| M0021 |            | 0.7686 |     |     |                 |                  |
| 6     | V\$TATA_C  | 82     | 571 | (+) | NCTATAAAAR      | AAAATAAAAAT      |
| M0025 |            | 0.7774 |     |     |                 |                  |
| 2     | V\$TATA_01 | 68     | 607 | (+) | STATAAAWRNNNNNN | CTATACATAATGAAC  |
| M0021 |            | 0.7491 |     |     |                 |                  |
| 6     | V\$TATA_C  | 42     | 637 | (+) | NCTATAAAAR      | AACTTATAAA       |
| M0021 |            | 0.8978 |     |     |                 |                  |
| 6     | V\$TATA_C  | 08     | 639 | (+) | NCTATAAAAR      | CTTATAAAAAT      |
| M0025 |            | 0.8200 |     |     |                 |                  |
| 2     | V\$TATA_01 | 96     | 640 | (+) | STATAAAWRNNNNNN | TTATAAAATTTAATA  |
| M0025 |            | 0.8629 |     |     |                 |                  |
| 2     | V\$TATA_01 | 79     | 652 | (+) | STATAAAWRNNNNNN | ATATATATATCATCT  |
| M0025 |            | 0.8038 |     |     |                 |                  |
| 2     | V\$TATA_01 | 57     | 654 | (+) | STATAAAWRNNNNNN | ATATATATCATCTTA  |
| M0021 |            | 0.8566 |     |     |                 |                  |
| 6     | V\$TATA_C  | 15     | 668 | (+) | NCTATAAAAR      | ATTTTAAAC        |
| M0025 |            | 0.7764 |     |     |                 |                  |
| 2     | V\$TATA_01 | 53     | 668 | (+) | STATAAAWRNNNNNN | ATTTTAAACATTGT   |
| M0021 |            | 0.7692 |     |     |                 |                  |
| 6     | V\$TATA_C  | 1      | 684 | (+) | NCTATAAAAR      | ATTATGAAAT       |
| M0021 |            | 0.8365 |     |     |                 |                  |
| 6     | V\$TATA_C  | 46     | 693 | (+) | NCTATAAAAR      | TGCTTATAAA       |
| M0025 |            | 0.8066 |     |     |                 |                  |
| 2     | V\$TATA_01 | 48     | 694 | (+) | STATAAAWRNNNNNN | GCTTATAAAGTGAAT  |
| M0021 |            | 0.7758 |     |     |                 |                  |
| 6     | V\$TATA_C  | 12     | 695 | (+) | NCTATAAAAR      | CTTATAAAGT       |
| M0025 |            | 0.8134 |     |     |                 |                  |
| 2     | V\$TATA_01 | 99     | 696 | (+) | STATAAAWRNNNNNN | TTATAAAGTGAATGT  |
| M0021 |            | 0.9994 |     |     |                 |                  |
| 6     | V\$TATA_C  | 72     | 723 | (+) | NCTATAAAAR      | CCTATAAAAG       |
| M0025 |            | 0.9441 |     |     |                 |                  |
| 2     | V\$TATA_01 | 77     | 724 | (+) | STATAAAWRNNNNNN | CTATAAAAGGAAACA  |

|       |            |        |      |     |                 |                  |
|-------|------------|--------|------|-----|-----------------|------------------|
| M0021 |            | 0.7449 |      |     |                 |                  |
| 6     | V\$TATA_C  | 17     | 798  | (+) | NCTATAAAAR      | ATCTTAAGAG       |
| M0021 |            | 0.7752 |      |     |                 |                  |
| 6     | V\$TATA_C  | 84     | 883  | (+) | NCTATAAAAR      | CAAATAAAAT       |
| M0025 |            | 0.7741 |      |     |                 |                  |
| 2     | V\$TATA_01 | 69     | 884  | (+) | STATAAAWRNNNNNN | AAATAAAATCTTGCC  |
| M0021 |            | 0.7628 |      |     |                 |                  |
| 6     | V\$TATA_C  | 73     | 896  | (+) | NCTATAAAAR      | GCCATTTAAA       |
| M0021 |            | 0.7599 |      |     |                 |                  |
| 6     | V\$TATA_C  | 68     | 897  | (+) | NCTATAAAAR      | CCATTTAAAA       |
| M0025 |            | 0.7751 |      |     |                 |                  |
| 2     | V\$TATA_01 | 84     | 897  | (+) | STATAAAWRNNNNNN | CCATTTAAAAATAAT  |
| M0021 |            | 0.8476 |      |     |                 |                  |
| 6     | V\$TATA_C  | 37     | 898  | (+) | NCTATAAAAR      | CATTTAAAAA       |
| M0021 |            | 0.7435 |      |     |                 |                  |
| 6     | V\$TATA_C  | 97     | 899  | (+) | NCTATAAAAR      | ATTTAAAAAT       |
| M0025 |            | 0.8228 |      |     |                 |                  |
| 2     | V\$TATA_01 | 88     | 899  | (+) | STATAAAWRNNNNNN | ATTTAAAAATAATTG  |
| M0025 |            | 0.7703 |      |     |                 |                  |
| 2     | V\$TATA_01 | 63     | 1075 | (+) | STATAAAWRNNNNNN | TTATATGTCAAAAAG  |
| M0021 |            | 0.8159 |      |     |                 |                  |
| 6     | V\$TATA_C  | 49     | 1223 | (+) | NCTATAAAAR      | TGCATGAAAAG      |
| M0025 |            | 0.7784 |      |     |                 |                  |
| 2     | V\$TATA_01 | 83     | 1224 | (+) | STATAAAWRNNNNNN | GCATGAAAGTGAAAA  |
| M0021 |            | 0.7628 |      |     |                 |                  |
| 6     | V\$TATA_C  | 73     | 1233 | (+) | NCTATAAAAR      | TGAAAAAAAG       |
| M0021 |            | 0.7528 |      |     |                 |                  |
| 6     | V\$TATA_C  | 39     | 1358 | (+) | NCTATAAAAR      | TCTGCAAAAA       |
| M0021 |            | 0.8159 |      |     |                 |                  |
| 6     | V\$TATA_C  | 49     | 1360 | (+) | NCTATAAAAR      | TGCAAAAAAG       |
| M0021 |            | 0.7974 |      |     |                 |                  |
| 6     | V\$TATA_C  | 65     | 1368 | (+) | NCTATAAAAR      | AGCATTAAAA       |
| M0021 |            | 0.8531 |      |     |                 |                  |
| 6     | V\$TATA_C  | 82     | 1369 | (+) | NCTATAAAAR      | GCATTAAAAAT      |
| M0025 |            | 0.7934 |      |     |                 |                  |
| 2     | V\$TATA_01 | 53     | 1369 | (+) | STATAAAWRNNNNNN | GCATTAAAAATAACTT |
| M0021 |            | 0.7570 |      |     |                 |                  |
| 6     | V\$TATA_C  | 64     | 1413 | (+) | NCTATAAAAR      | ACTGGAAAAAG      |
| M0025 |            | 0.7863 |      |     |                 |                  |
| 2     | V\$TATA_01 | 49     | 1429 | (+) | STATAAAWRNNNNNN | CGATATGTAGTCAGC  |
| M0025 |            | 0.8013 |      |     |                 |                  |
| 2     | V\$TATA_01 | 19     | 1457 | (+) | STATAAAWRNNNNNN | TTATATGTGGTCATA  |
| M0021 |            | 0.7818 |      |     |                 |                  |
| 6     | V\$TATA_C  | 85     | 1504 | (+) | NCTATAAAAR      | AGTTAAAAAT       |
| M0025 |            | 0.7706 |      |     |                 |                  |
| 2     | V\$TATA_01 | 17     | 1504 | (+) | STATAAAWRNNNNNN | AGTTAAAAATCTCGT  |
| M0021 |            | 0.8819 |      |     |                 |                  |
| 6     | V\$TATA_C  | 65     | 1628 | (+) | NCTATAAAAR      | CCCTTATAAG       |
| M0025 |            | 0.8327 |      |     |                 |                  |
| 2     | V\$TATA_01 | 84     | 1629 | (+) | STATAAAWRNNNNNN | CCTTATAAGGGAGGC  |
| M0025 |            | 0.7921 |      |     |                 |                  |
| 2     | V\$TATA_01 | 85     | 1631 | (+) | STATAAAWRNNNNNN | TTATAAGGGAGGCAG  |
| M0021 |            | 0.8830 |      |     |                 |                  |
| 6     | V\$TATA_C  | 21     | 1668 | (+) | NCTATAAAAR      | ATTTTAAAAA       |
| M0021 |            | 0.7795 |      |     |                 |                  |
| 6     | V\$TATA_C  | 09     | 1669 | (+) | NCTATAAAAR      | TTTTAAAAAG       |
| M0025 |            | 0.8119 |      |     |                 |                  |
| 2     | V\$TATA_01 | 77     | 1669 | (+) | STATAAAWRNNNNNN | TTTTAAAAAGATTTC  |
| M0025 |            | 0.7802 |      |     |                 |                  |
| 2     | V\$TATA_01 | 59     | 1719 | (+) | STATAAAWRNNNNNN | ATTTAAGAAGAATTG  |
| M0021 |            | 0.7948 |      |     |                 |                  |
| 6     | V\$TATA_C  | 24     | 1730 | (+) | NCTATAAAAR      | ATTGTAAAAA       |
| M0021 |            | 0.8320 |      |     |                 |                  |
| 6     | V\$TATA_C  | 57     | 1732 | (+) | NCTATAAAAR      | TGTAAAAAAA       |
| M0025 |            | 0.8107 |      |     |                 |                  |
| 2     | V\$TATA_01 | 08     | 1733 | (+) | STATAAAWRNNNNNN | GTAAAAAAAATATG   |

|       |            |        |      |     |                 |                 |
|-------|------------|--------|------|-----|-----------------|-----------------|
| M0021 |            | 0.8249 |      |     |                 |                 |
| 6     | V\$TATA_C  | 27     | 1756 | (+) | NCTATAAAAR      | AGTATAAACA      |
| M0025 |            | 0.8236 |      |     |                 |                 |
| 2     | V\$TATA_01 | 49     | 1757 | (+) | STATAAAWRNNNNNN | GTATAAACATCACTA |
| M0025 |            | 0.7883 |      |     |                 |                 |
| 2     | V\$TATA_01 | 79     | 1829 | (+) | STATAAAWRNNNNNN | GAATAAGTGGGTAAA |
| M0025 |            | 0.7751 |      |     |                 |                 |
| 2     | V\$TATA_01 | 84     | 1849 | (+) | STATAAAWRNNNNNN | AAATAAATTAGCCAT |
| M0025 |            | 0.8226 |      |     |                 |                 |
| 2     | V\$TATA_01 | 34     | 1860 | (+) | STATAAAWRNNNNNN | CCATTTATACATAGG |
| M0025 |            | 0.7761 |      |     |                 |                 |
| 2     | V\$TATA_01 | 99     | 1864 | (+) | STATAAAWRNNNNNN | TTATACATAGGGTCA |
| M0025 |            | 0.7820 |      |     |                 |                 |
| 2     | V\$TATA_01 | 35     | 1866 | (+) | STATAAAWRNNNNNN | ATACATAGGGTCAGT |
| M0025 |            | 0.7797 |      |     |                 |                 |
| 2     | V\$TATA_01 | 51     | 1917 | (+) | STATAAAWRNNNNNN | CTATTTAGAACTAA  |
| M0025 |            | 0.7833 |      |     |                 |                 |
| 2     | V\$TATA_01 | 04     | 1999 | (+) | STATAAAWRNNNNNN | GTATTCAAATCCATG |
| M0021 |            | 0.7414 |      |     |                 |                 |
| 6     | V\$TATA_C  | 84     | 2014 | (+) | NCTATAAAAR      | CGTTTATCAA      |
| M0021 |            | 0.7948 |      |     |                 |                 |
| 6     | V\$TATA_C  | 24     | 2107 | (+) | NCTATAAAAR      | TGATTATAAG      |
| M0025 |            | 0.8223 |      |     |                 |                 |
| 2     | V\$TATA_01 | 8      | 2108 | (+) | STATAAAWRNNNNNN | GATTATAAGGAGAGT |
| M0025 |            | 0.7746 |      |     |                 |                 |
| 2     | V\$TATA_01 | 76     | 2110 | (+) | STATAAAWRNNNNNN | TTATAAGGAGAGTAA |
| M0025 |            |        |      |     |                 |                 |
| 2     | V\$TATA_01 | 0.7729 | 2130 | (+) | STATAAAWRNNNNNN | TTATTAATTAGCTTC |
| M0021 |            | 0.7443 |      |     |                 |                 |
| 6     | V\$TATA_C  | 89     | 2218 | (+) | NCTATAAAAR      | AGCATGTAAG      |
| M0021 |            | 0.8249 |      |     |                 |                 |
| 6     | V\$TATA_C  | 27     | 2226 | (+) | NCTATAAAAR      | AGTATAATAA      |
| M0025 |            | 0.8497 |      |     |                 |                 |
| 2     | V\$TATA_01 | 84     | 2227 | (+) | STATAAAWRNNNNNN | GTATAATAAGATACA |
| M0025 |            | 0.7703 |      |     |                 |                 |
| 2     | V\$TATA_01 | 63     | 2254 | (+) | STATAAAWRNNNNNN | TTATGTAAATATAAG |
| M0025 |            | 0.7924 |      |     |                 |                 |
| 2     | V\$TATA_01 | 38     | 2258 | (+) | STATAAAWRNNNNNN | GTAAATATAAGAATA |
| M0021 |            | 0.7401 |      |     |                 |                 |
| 6     | V\$TATA_C  | 64     | 2259 | (+) | NCTATAAAAR      | TAAATATAAG      |
| M0025 |            | 0.7959 |      |     |                 |                 |
| 2     | V\$TATA_01 | 91     | 2260 | (+) | STATAAAWRNNNNNN | AAATATAAGAAATT  |
| M0021 |            | 0.7446 |      |     |                 |                 |
| 6     | V\$TATA_C  | 53     | 2261 | (+) | NCTATAAAAR      | AATATAAGAA      |
| M0025 |            | 0.7840 |      |     |                 |                 |
| 2     | V\$TATA_01 | 65     | 2262 | (+) | STATAAAWRNNNNNN | ATATAAGAATATTAA |
| M0025 |            | 0.7731 |      |     |                 |                 |
| 2     | V\$TATA_01 | 54     | 2270 | (+) | STATAAAWRNNNNNN | ATATTAAATTGTTTA |
| M0021 |            | 0.7533 |      |     |                 |                 |
| 6     | V\$TATA_C  | 67     | 2279 | (+) | NCTATAAAAR      | TGTTTATGAG      |
| M0025 |            | 0.7929 |      |     |                 |                 |
| 2     | V\$TATA_01 | 46     | 2280 | (+) | STATAAAWRNNNNNN | GTTTATGAGGATAAT |
| M0021 |            | 0.7686 |      |     |                 |                 |
| 6     | V\$TATA_C  | 82     | 2326 | (+) | NCTATAAAAR      | AGTGTATAAA      |
| M0021 |            | 0.8146 |      |     |                 |                 |
| 6     | V\$TATA_C  | 29     | 2328 | (+) | NCTATAAAAR      | TGTATAAATT      |
| M0025 |            | 0.8604 |      |     |                 |                 |
| 2     | V\$TATA_01 | 42     | 2329 | (+) | STATAAAWRNNNNNN | GTATAAATTTTGAAA |
| M0021 |            | 0.7441 |      |     |                 |                 |
| 6     | V\$TATA_C  | 25     | 2344 | (+) | NCTATAAAAR      | CCTATAATCA      |
| M0021 |            | 0.7401 |      |     |                 |                 |
| 6     | V\$TATA_C  | 64     | 2373 | (+) | NCTATAAAAR      | CTTATGTAAG      |
| M0025 |            | 0.7736 |      |     |                 |                 |
| 2     | V\$TATA_01 | 62     | 2383 | (+) | STATAAAWRNNNNNN | TTATGAAGATGGACA |
| M0021 |            | 0.8106 |      |     |                 |                 |
| 6     | V\$TATA_C  | 68     | 2453 | (+) | NCTATAAAAR      | AGTAAAAAAG      |

|       |             |        |      |     |                  |                 |
|-------|-------------|--------|------|-----|------------------|-----------------|
| M0025 |             | 0.7886 |      |     |                  |                 |
| 2     | V\$TATA_01  | 32     | 2453 | (+) | STATAAAWRNNNNNNN | AGTAAAAAGCGTAC  |
| M0025 |             | 0.7779 |      |     |                  |                 |
| 2     | V\$TATA_01  | 75     | 2454 | (+) | STATAAAWRNNNNNNN | GTAAAAAGCGTACA  |
| M0021 |             | 0.8391 |      |     |                  |                 |
| 6     | V\$TATA_C   | 87     | 2475 | (+) | NCTATAAAAR       | TCCATAAACA      |
| M0021 |             | 0.8740 |      |     |                  |                 |
| 6     | V\$TATA_C   | 43     | 2525 | (+) | NCTATAAAAR       | TTCTTAAAG       |
| M0021 |             | 0.8320 |      |     |                  |                 |
| 6     | V\$TATA_C   | 57     | 2548 | (+) | NCTATAAAAR       | ACCATAACAA      |
| M0025 |             | 0.7772 |      |     |                  |                 |
| 2     | V\$TATA_01  | 14     | 2549 | (+) | STATAAAWRNNNNNNN | CCATAACAAGGACTT |
| M0021 |             | 0.8523 |      |     |                  |                 |
| 6     | V\$TATA_C   | 9      | 2563 | (+) | NCTATAAAAR       | TCTTTTAAAG      |
| M0021 |             | 0.7501 |      |     |                  |                 |
| 6     | V\$TATA_C   | 98     | 2564 | (+) | NCTATAAAAR       | CTTTTAAAGT      |
| M0025 |             | 0.8142 |      |     |                  |                 |
| 2     | V\$TATA_01  | 6      | 2564 | (+) | STATAAAWRNNNNNNN | CTTTTAAAGTTCAGG |
| M0021 |             | 0.8135 |      |     |                  |                 |
| 6     | V\$TATA_C   | 73     | 2850 | (+) | NCTATAAAAR       | TCCTTAAACA      |
| M0021 |             | 0.8339 |      |     |                  |                 |
| 6     | V\$TATA_C   | 05     | 2930 | (+) | NCTATAAAAR       | ACTTTGAAAA      |
| M0021 |             | 0.7501 |      |     |                  |                 |
| 6     | V\$TATA_C   | 98     | 2931 | (+) | NCTATAAAAR       | CTTTGAAAAT      |
| M0025 |             | 0.8008 |      |     |                  |                 |
| 2     | V\$TATA_01  | 12     | 3034 | (+) | STATAAAWRNNNNNNN | TGATAAGAAGGACT  |
| M0020 |             | 0.8369 |      |     |                  |                 |
| 3     | V\$GATA_C   | 06     | 14   | (-) | NGATAAGNMNN      | ACTACTTGCTCT    |
| M0012 |             | 0.8503 |      |     |                  |                 |
| 7     | V\$GATA1_03 | 18     | 15   | (-) | RNSNNGATAANNNGN  | CTACTTGCTTCCT   |
| M0020 |             | 0.9164 |      |     |                  |                 |
| 3     | V\$GATA_C   | 34     | 50   | (-) | NGATAAGNMNN      | TTCATTTATCT     |
| M0012 |             | 0.8462 |      |     |                  |                 |
| 6     | V\$GATA1_02 | 5      | 51   | (-) | NNNNNGATANKGNN   | TCATTTATCTTTTT  |
| M0012 |             | 0.8770 |      |     |                  |                 |
| 7     | V\$GATA1_03 | 21     | 51   | (-) | RNSNNGATAANNNGN  | TCATTTATCTTTTT  |
| M0012 |             | 0.9065 |      |     |                  |                 |
| 8     | V\$GATA1_04 | 56     | 51   | (-) | NNCWGATARNNNN    | TCATTTATCTTTTT  |
| M0007 |             | 0.8069 |      |     |                  |                 |
| 6     | V\$GATA2_01 | 46     | 53   | (-) | NNNGATRNNN       | ATTTATCTTT      |
| M0007 |             | 0.8466 |      |     |                  |                 |
| 7     | V\$GATA3_01 | 99     | 53   | (-) | NNGATARNG        | ATTTATCTT       |
| M0012 |             | 0.8168 |      |     |                  |                 |
| 6     | V\$GATA1_02 | 75     | 132  | (-) | NNNNNGATANKGNN   | ACTAATATCAGTGT  |
| M0012 |             | 0.7981 |      |     |                  |                 |
| 7     | V\$GATA1_03 | 38     | 132  | (-) | RNSNNGATAANNNGN  | ACTAATATCAGTGT  |
| M0007 |             | 0.8168 |      |     |                  |                 |
| 5     | V\$GATA1_01 | 81     | 134  | (-) | SNNGATNNNN       | TAATATCAGT      |
| M0007 |             | 0.8290 |      |     |                  |                 |
| 6     | V\$GATA2_01 | 48     | 134  | (-) | NNNGATRNNN       | TAATATCAGT      |
| M0007 |             | 0.8373 |      |     |                  |                 |
| 7     | V\$GATA3_01 | 95     | 134  | (-) | NNGATARNG        | TAATATCAG       |
| M0007 |             | 0.8168 |      |     |                  |                 |
| 5     | V\$GATA1_01 | 81     | 150  | (+) | SNNGATNNNN       | TAAGATTCTT      |
| M0007 |             | 0.8412 |      |     |                  |                 |
| 6     | V\$GATA2_01 | 27     | 150  | (+) | NNNGATRNNN       | TAAGATTCTT      |
| M0012 |             | 0.8379 |      |     |                  |                 |
| 8     | V\$GATA1_04 | 29     | 169  | (+) | NNCWGATARNNNN    | GTTTGATAGCTAA   |
| M0007 |             | 0.8509 |      |     |                  |                 |
| 5     | V\$GATA1_01 | 38     | 170  | (+) | SNNGATNNNN       | TTTGATAGCT      |
| M0007 |             | 0.8570 |      |     |                  |                 |
| 6     | V\$GATA2_01 | 14     | 170  | (+) | NNNGATRNNN       | TTTGATAGCT      |
| M0007 |             | 0.8311 |      |     |                  |                 |
| 7     | V\$GATA3_01 | 92     | 171  | (+) | NNGATARNG        | TTGATAGCT       |
| M0020 |             | 0.8381 |      |     |                  |                 |
| 3     | V\$GATA_C   | 48     | 172  | (+) | NGATAAGNMNN      | TGATAGCTAAC     |



|       |             |        |     |     |                 |                |
|-------|-------------|--------|-----|-----|-----------------|----------------|
| M0007 |             | 0.7892 |     |     |                 |                |
| 5     | V\$GATA1_01 | 4      | 189 | (+) | SNNGATNNNN      | ACTGATTTAT     |
| M0020 |             | 0.9167 |     |     |                 |                |
| 3     | V\$GATA_C   | 44     | 190 | (-) | NGATAAGNMNN     | CTGATTTATCT    |
| M0012 |             |        |     |     |                 |                |
| 6     | V\$GATA1_02 | 0.7975 | 191 | (-) | NNNNNGATANKGNN  | TGATTTATCTCCTT |
| M0012 |             | 0.8645 |     |     |                 |                |
| 7     | V\$GATA1_03 | 27     | 191 | (-) | RNSNNGATAANNNGN | TGATTTATCTCCTT |
| M0012 |             | 0.8998 |     |     |                 |                |
| 8     | V\$GATA1_04 | 16     | 191 | (-) | NNCWGATARNNNN   | TGATTTATCTCCT  |
| M0007 |             | 0.8464 |     |     |                 |                |
| 5     | V\$GATA1_01 | 96     | 193 | (-) | SNNGATNNNN      | ATTTATCTCC     |
| M0007 |             | 0.8619 |     |     |                 |                |
| 6     | V\$GATA2_01 | 76     | 193 | (-) | NNNGATRNNN      | ATTTATCTCC     |
| M0007 |             | 0.8639 |     |     |                 |                |
| 7     | V\$GATA3_01 | 79     | 193 | (-) | NNGATARNG       | ATTTATCTC      |
| M0012 |             | 0.8170 |     |     |                 |                |
| 7     | V\$GATA1_03 | 01     | 245 | (-) | RNSNNGATAANNNGN | ATTGTTATACTGCT |
| M0020 |             | 0.8794 |     |     |                 |                |
| 3     | V\$GATA_C   | 66     | 254 | (-) | NGATAAGNMNN     | CTGCTCTATCT    |
| M0012 |             | 0.8403 |     |     |                 |                |
| 6     | V\$GATA1_02 | 13     | 255 | (-) | NNNNNGATANKGNN  | TGCTCTATCTTATG |
| M0012 |             | 0.9142 |     |     |                 |                |
| 8     | V\$GATA1_04 | 16     | 255 | (-) | NNCWGATARNNNN   | TGCTCTATCTTAT  |
| M0007 |             | 0.8381 |     |     |                 |                |
| 5     | V\$GATA1_01 | 05     | 257 | (-) | SNNGATNNNN      | CTCTATCTTA     |
| M0007 |             | 0.9039 |     |     |                 |                |
| 6     | V\$GATA2_01 | 24     | 257 | (-) | NNNGATRNNN      | CTCTATCTTA     |
| M0007 |             | 0.9419 |     |     |                 |                |
| 7     | V\$GATA3_01 | 58     | 257 | (-) | NNGATARNG       | CTCTATCTT      |
| M0007 |             | 0.7857 |     |     |                 |                |
| 5     | V\$GATA1_01 | 85     | 287 | (+) | SNNGATNNNN      | AAGGATGAGC     |
| M0007 |             | 0.8358 |     |     |                 |                |
| 6     | V\$GATA2_01 | 14     | 287 | (+) | NNNGATRNNN      | AAGGATGAGC     |
| M0007 |             | 0.7956 |     |     |                 |                |
| 5     | V\$GATA1_01 | 56     | 295 | (-) | SNNGATNNNN      | GCTAATCATA     |
| M0007 |             | 0.8064 |     |     |                 |                |
| 6     | V\$GATA2_01 | 95     | 295 | (-) | NNNGATRNNN      | GCTAATCATA     |
| M0007 |             | 0.8303 |     |     |                 |                |
| 7     | V\$GATA3_01 | 06     | 295 | (-) | NNGATARNG       | GCTAATCAT      |
| M0007 |             | 0.8010 |     |     |                 |                |
| 5     | V\$GATA1_01 | 86     | 316 | (-) | SNNGATNNNN      | GAAAATCCAG     |
| M0007 |             | 0.8020 |     |     |                 |                |
| 5     | V\$GATA1_01 | 73     | 353 | (-) | SNNGATNNNN      | CTGGATCACT     |
| M0012 |             | 0.8032 |     |     |                 |                |
| 7     | V\$GATA1_03 | 83     | 357 | (-) | RNSNNGATAANNNGN | ATCACTTTCTTCAT |
| M0007 |             | 0.7852 |     |     |                 |                |
| 5     | V\$GATA1_01 | 91     | 365 | (-) | SNNGATNNNN      | CTTCATCTGT     |
| M0007 |             | 0.7997 |     |     |                 |                |
| 6     | V\$GATA2_01 | 29     | 365 | (-) | NNNGATRNNN      | CTTCATCTGT     |
| M0007 |             | 0.8542 |     |     |                 |                |
| 7     | V\$GATA3_01 | 31     | 365 | (-) | NNGATARNG       | CTTCATCTG      |
| M0007 |             | 0.8258 |     |     |                 |                |
| 6     | V\$GATA2_01 | 91     | 428 | (+) | NNNGATRNNN      | CAACATACCT     |
| M0007 |             | 0.9131 |     |     |                 |                |
| 5     | V\$GATA1_01 | 29     | 457 | (+) | SNNGATNNNN      | GCGGATGCTT     |
| M0007 |             | 0.9142 |     |     |                 |                |
| 6     | V\$GATA2_01 | 99     | 457 | (+) | NNNGATRNNN      | GCGGATGCTT     |
| M0012 |             | 0.7814 |     |     |                 |                |
| 7     | V\$GATA1_03 | 8      | 474 | (-) | RNSNNGATAANNNGN | ACAACTATTTCTAT |
| M0020 |             | 0.8735 |     |     |                 |                |
| 3     | V\$GATA_C   | 63     | 492 | (-) | NGATAAGNMNN     | CTCATTTATCA    |
| M0012 |             |        |     |     |                 |                |
| 6     | V\$GATA1_02 | 0.8425 | 493 | (-) | NNNNNGATANKGNN  | TCATTTATCAACAA |
| M0012 |             | 0.8003 |     |     |                 |                |
| 7     | V\$GATA1_03 | 43     | 493 | (-) | RNSNNGATAANNNGN | TCATTTATCAACAA |

|       |             |        |     |     |                 |                 |
|-------|-------------|--------|-----|-----|-----------------|-----------------|
| M0012 |             | 0.8550 |     |     |                 |                 |
| 8     | V\$GATA1_04 | 86     | 493 | (-) | NNCWGATARNNNN   | TCATTTATCAACA   |
| M0007 |             | 0.8025 |     |     |                 |                 |
| 5     | V\$GATA1_01 | 67     | 495 | (-) | SNNGATNNNN      | ATTTATCAAC      |
| M0012 |             | 0.7918 |     |     |                 |                 |
| 6     | V\$GATA1_02 | 75     | 502 | (+) | NNNNNGATANKGNN  | AACAAGATAAAAAAC |
| M0012 |             | 0.8983 |     |     |                 |                 |
| 7     | V\$GATA1_03 | 34     | 502 | (+) | RNSNNGATAANNNGN | AACAAGATAAAAAAC |
| M0012 |             | 0.9267 |     |     |                 |                 |
| 8     | V\$GATA1_04 | 77     | 503 | (+) | NNCWGATARNNNN   | ACAAGATAAAAAAC  |
| M0007 |             | 0.7867 |     |     |                 |                 |
| 5     | V\$GATA1_01 | 72     | 504 | (+) | SNNGATNNNN      | CAAGATAAAAA     |
| M0007 |             | 0.8186 |     |     |                 |                 |
| 6     | V\$GATA2_01 | 74     | 504 | (+) | NNNGATRNNN      | CAAGATAAAAA     |
| M0007 |             |        |     |     |                 |                 |
| 7     | V\$GATA3_01 | 0.8786 | 505 | (+) | NNGATARNG       | AAGATAAAAA      |
| M0020 |             | 0.9558 |     |     |                 |                 |
| 3     | V\$GATA_C   | 87     | 506 | (+) | NGATAAGNMNN     | AGATAAAAAACA    |
| M0020 |             | 0.8465 |     |     |                 |                 |
| 3     | V\$GATA_C   | 36     | 535 | (-) | NGATAAGNMNN     | AATATTTGTCC     |
| M0012 |             | 0.7728 |     |     |                 |                 |
| 6     | V\$GATA1_02 | 13     | 575 | (-) | NNNNNGATANKGNN  | TAAAATATCTTAAG  |
| M0007 |             | 0.8193 |     |     |                 |                 |
| 5     | V\$GATA1_01 | 48     | 577 | (-) | SNNGATNNNN      | AAATATCTTA      |
| M0007 |             | 0.8944 |     |     |                 |                 |
| 6     | V\$GATA2_01 | 52     | 577 | (-) | NNNGATRNNN      | AAATATCTTA      |
| M0007 |             | 0.8347 |     |     |                 |                 |
| 7     | V\$GATA3_01 | 36     | 577 | (-) | NNGATARNG       | AAATATCTT       |
| M0020 |             | 0.8570 |     |     |                 |                 |
| 3     | V\$GATA_C   | 98     | 653 | (-) | NGATAAGNMNN     | TATATATATCA     |
| M0012 |             | 0.8578 |     |     |                 |                 |
| 8     | V\$GATA1_04 | 43     | 654 | (-) | NNCWGATARNNNN   | ATATATATCATCT   |
| M0007 |             | 0.8568 |     |     |                 |                 |
| 5     | V\$GATA1_01 | 61     | 656 | (-) | SNNGATNNNN      | ATATATCATC      |
| M0007 |             | 0.8574 |     |     |                 |                 |
| 6     | V\$GATA2_01 | 65     | 656 | (-) | NNNGATRNNN      | ATATATCATC      |
| M0007 |             | 0.8213 |     |     |                 |                 |
| 6     | V\$GATA2_01 | 8      | 659 | (-) | NNNGATRNNN      | TATCATCTTA      |
| M0007 |             | 0.8449 |     |     |                 |                 |
| 7     | V\$GATA3_01 | 27     | 659 | (-) | NNGATARNG       | TATCATCTT       |
| M0012 |             | 0.7831 |     |     |                 |                 |
| 7     | V\$GATA1_03 | 95     | 692 | (+) | RNSNNGATAANNNGN | ATGCTTATAAAGTG  |
| M0020 |             | 0.8881 |     |     |                 |                 |
| 3     | V\$GATA_C   | 64     | 714 | (-) | NGATAAGNMNN     | GTGCATTATCC     |
| M0012 |             |        |     |     |                 |                 |
| 6     | V\$GATA1_02 | 0.8175 | 715 | (-) | NNNNNGATANKGNN  | TGCATTATCCTATA  |
| M0012 |             | 0.8357 |     |     |                 |                 |
| 8     | V\$GATA1_04 | 84     | 715 | (-) | NNCWGATARNNNN   | TGCATTATCCTAT   |
| M0007 |             | 0.8079 |     |     |                 |                 |
| 5     | V\$GATA1_01 | 96     | 717 | (-) | SNNGATNNNN      | CATTATCCTA      |
| M0007 |             | 0.9070 |     |     |                 |                 |
| 6     | V\$GATA2_01 | 82     | 717 | (-) | NNNGATRNNN      | CATTATCCTA      |
| M0007 |             | 0.8883 |     |     |                 |                 |
| 7     | V\$GATA3_01 | 47     | 717 | (-) | NNGATARNG       | CATTATCCT       |
| M0012 |             | 0.8046 |     |     |                 |                 |
| 6     | V\$GATA1_02 | 88     | 738 | (-) | NNNNNGATANKGNN  | AAGAATATCTGGGA  |
| M0007 |             | 0.8859 |     |     |                 |                 |
| 5     | V\$GATA1_01 | 82     | 740 | (-) | SNNGATNNNN      | GAATATCTGG      |
| M0007 |             | 0.9079 |     |     |                 |                 |
| 6     | V\$GATA2_01 | 84     | 740 | (-) | NNNGATRNNN      | GAATATCTGG      |
| M0007 |             | 0.8289 |     |     |                 |                 |
| 7     | V\$GATA3_01 | 77     | 740 | (-) | NNGATARNG       | GAATATCTG       |
| M0007 |             | 0.8410 |     |     |                 |                 |
| 5     | V\$GATA1_01 | 66     | 747 | (+) | SNNGATNNNN      | TGGGATTCTT      |
| M0007 |             | 0.8637 |     |     |                 |                 |
| 6     | V\$GATA2_01 | 8      | 747 | (+) | NNNGATRNNN      | TGGGATTCTT      |

|       |             |        |      |     |                |                |
|-------|-------------|--------|------|-----|----------------|----------------|
| M0012 |             | 0.8259 |      |     |                |                |
| 6     | V\$GATA1_02 | 37     | 762  | (+) | NNNNNGATANKGNN | GAAATGATAAATTA |
| M0012 |             | 0.8052 |      |     |                |                |
| 7     | V\$GATA1_03 | 43     | 762  | (+) | RNSNNGATAANNGN | GAAATGATAAATTA |
| M0012 |             | 0.8584 |      |     |                |                |
| 8     | V\$GATA1_04 | 56     | 763  | (+) | NNCWGATARNNNN  | AAATGATAAATTA  |
| M0007 |             | 0.7739 |      |     |                |                |
| 5     | V\$GATA1_01 | 39     | 764  | (+) | SNNGATNNNN     | AATGATAAAT     |
| M0007 |             | 0.7956 |      |     |                |                |
| 6     | V\$GATA2_01 | 7      | 764  | (+) | NNNGATRNNN     | AATGATAAAT     |
| M0007 |             | 0.8232 |      |     |                |                |
| 7     | V\$GATA3_01 | 17     | 765  | (+) | NNGATARNG      | ATGATAAAT      |
| M0020 |             | 0.8934 |      |     |                |                |
| 3     | V\$GATA_C   | 45     | 766  | (+) | NGATAAGNMNN    | TGATAAATTA     |
| M0007 |             | 0.7884 |      |     |                |                |
| 6     | V\$GATA2_01 | 53     | 788  | (-) | NNNGATRNNN     | GGCAATGCTA     |
| M0007 |             | 0.7749 |      |     |                |                |
| 5     | V\$GATA1_01 | 26     | 794  | (-) | SNNGATNNNN     | GCTAATCTTA     |
| M0007 |             | 0.8177 |      |     |                |                |
| 6     | V\$GATA2_01 | 72     | 794  | (-) | NNNGATRNNN     | GCTAATCTTA     |
| M0007 |             | 0.8537 |      |     |                |                |
| 7     | V\$GATA3_01 | 88     | 794  | (-) | NNGATARNG      | GCTAATCTT      |
| M0012 |             | 0.7910 |      |     |                |                |
| 7     | V\$GATA1_03 | 34     | 849  | (+) | RNSNNGATAANNGN | GCAAAGATCACCAG |
| M0007 |             | 0.8736 |      |     |                |                |
| 5     | V\$GATA1_01 | 43     | 851  | (-) | SNNGATNNNN     | AAAGATCACC     |
| M0007 |             | 0.7979 |      |     |                |                |
| 6     | V\$GATA2_01 | 25     | 851  | (+) | NNNGATRNNN     | AAAGATCACC     |
| M0007 |             | 0.8412 |      |     |                |                |
| 6     | V\$GATA2_01 | 27     | 851  | (-) | NNNGATRNNN     | AAAGATCACC     |
| M0007 |             | 0.8208 |      |     |                |                |
| 5     | V\$GATA1_01 | 29     | 887  | (-) | SNNGATNNNN     | TAAAATCTTG     |
| M0007 |             | 0.8092 |      |     |                |                |
| 6     | V\$GATA2_01 | 02     | 887  | (-) | NNNGATRNNN     | TAAAATCTTG     |
| M0007 |             | 0.8329 |      |     |                |                |
| 7     | V\$GATA3_01 | 64     | 887  | (-) | NNGATARNG      | TAAAATCTT      |
| M0012 |             | 0.7915 |      |     |                |                |
| 7     | V\$GATA1_03 | 24     | 1002 | (-) | RNSNNGATAANNGN | CAGCCTACCAGGCT |
| M0007 |             | 0.7892 |      |     |                |                |
| 5     | V\$GATA1_01 | 4      | 1017 | (-) | SNNGATNNNN     | CTCCATCCAT     |
| M0007 |             | 0.7773 |      |     |                |                |
| 5     | V\$GATA1_01 | 94     | 1026 | (+) | SNNGATNNNN     | TGGGATCTTC     |
| M0007 |             | 0.8099 |      |     |                |                |
| 5     | V\$GATA1_01 | 7      | 1026 | (-) | SNNGATNNNN     | TGGGATCTTC     |
| M0007 |             | 0.8488 |      |     |                |                |
| 6     | V\$GATA2_01 | 95     | 1026 | (+) | NNNGATRNNN     | TGGGATCTTC     |
| M0007 |             | 0.8448 |      |     |                |                |
| 6     | V\$GATA2_01 | 35     | 1026 | (-) | NNNGATRNNN     | TGGGATCTTC     |
| M0007 |             |        |      |     |                |                |
| 5     | V\$GATA1_01 | 0.7769 | 1095 | (+) | SNNGATNNNN     | GCTGCTGCTG     |
| M0007 |             | 0.8262 |      |     |                |                |
| 5     | V\$GATA1_01 | 59     | 1172 | (+) | SNNGATNNNN     | TGGGATTCTC     |
| M0007 |             | 0.8601 |      |     |                |                |
| 6     | V\$GATA2_01 | 71     | 1172 | (+) | NNNGATRNNN     | TGGGATTCTC     |
| M0012 |             | 0.7841 |      |     |                |                |
| 7     | V\$GATA1_03 | 74     | 1179 | (+) | RNSNNGATAANNGN | CTCCAGACAAGAAT |
| M0012 |             | 0.8186 |      |     |                |                |
| 8     | V\$GATA1_04 | 27     | 1180 | (+) | NNCWGATARNNNN  | TCCAGACAAGAAT  |
| M0020 |             | 0.8794 |      |     |                |                |
| 3     | V\$GATA_C   | 66     | 1183 | (+) | NGATAAGNMNN    | AGACAAGAATA    |
| M0007 |             | 0.7862 |      |     |                |                |
| 5     | V\$GATA1_01 | 78     | 1225 | (+) | SNNGATNNNN     | CATGAAAGTG     |
| M0012 |             | 0.7915 |      |     |                |                |
| 7     | V\$GATA1_03 | 24     | 1288 | (-) | RNSNNGATAANNGN | CAGCCTACCAGGCT |
| M0007 |             | 0.7892 |      |     |                |                |
| 5     | V\$GATA1_01 | 4      | 1303 | (-) | SNNGATNNNN     | CTCCATCCAT     |

|       |             |        |      |     |                 |                |
|-------|-------------|--------|------|-----|-----------------|----------------|
| M0007 |             | 0.8050 |      |     |                 |                |
| 5     | V\$GATA1_01 | 35     | 1312 | (+) | SNNGATNNNN      | TGGGATTTTC     |
| M0007 |             | 0.8488 |      |     |                 |                |
| 6     | V\$GATA2_01 | 95     | 1312 | (+) | NNNGATRNNN      | TGGGATTTTC     |
| M0020 |             | 0.8381 |      |     |                 |                |
| 3     | V\$GATA_C   | 48     | 1350 | (-) | NGATAAGNMNN     | TTGCCTTCTCT    |
| M0012 |             | 0.7834 |      |     |                 |                |
| 6     | V\$GATA1_02 | 38     | 1351 | (-) | NNNNNGATANKGNN  | TGCCTTCTCTGCAA |
| M0012 |             | 0.8174 |      |     |                 |                |
| 8     | V\$GATA1_04 | 02     | 1351 | (-) | NNCWGATARNNNN   | TGCCTTCTCTGCA  |
| M0007 |             | 0.8245 |      |     |                 |                |
| 7     | V\$GATA3_01 | 46     | 1353 | (-) | NNGATARNG       | CCTTCTCTG      |
| M0012 |             | 0.7956 |      |     |                 |                |
| 7     | V\$GATA1_03 | 88     | 1395 | (-) | RNSNNGATAANNNGN | TCAGTTATTTGTTT |
| M0012 |             |        |      |     |                 |                |
| 6     | V\$GATA1_02 | 0.78   | 1425 | (+) | NNNNNGATANKGNN  | GCATCGATATGTAG |
| M0007 |             | 0.8020 |      |     |                 |                |
| 5     | V\$GATA1_01 | 73     | 1427 | (+) | SNNGATNNNN      | ATCGATATGT     |
| M0007 |             | 0.7834 |      |     |                 |                |
| 6     | V\$GATA2_01 | 91     | 1427 | (+) | NNNGATRNNN      | ATCGATATGT     |
| M0020 |             | 0.8403 |      |     |                 |                |
| 3     | V\$GATA_C   | 23     | 1452 | (-) | NGATAAGNMNN     | GGGACTTATAT    |
| M0007 |             | 0.8046 |      |     |                 |                |
| 6     | V\$GATA2_01 | 91     | 1465 | (+) | NNNGATRNNN      | GGTCATAGTA     |
| M0012 |             | 0.7721 |      |     |                 |                |
| 6     | V\$GATA1_02 | 88     | 1475 | (+) | NNNNNGATANKGNN  | TTAGAGATTGAGCT |
| M0007 |             | 0.8346 |      |     |                 |                |
| 5     | V\$GATA1_01 | 5      | 1477 | (+) | SNNGATNNNN      | AGAGATTGAG     |
| M0007 |             | 0.8150 |      |     |                 |                |
| 6     | V\$GATA2_01 | 65     | 1477 | (+) | NNNGATRNNN      | AGAGATTGAG     |
| M0007 |             | 0.9255 |      |     |                 |                |
| 7     | V\$GATA3_01 | 65     | 1478 | (+) | NNGATARNG       | GAGATTGAG      |
| M0007 |             | 0.8336 |      |     |                 |                |
| 5     | V\$GATA1_01 | 62     | 1492 | (+) | SNNGATNNNN      | GGGGATCTTC     |
| M0007 |             | 0.8307 |      |     |                 |                |
| 5     | V\$GATA1_01 | 01     | 1492 | (-) | SNNGATNNNN      | GGGGATCTTC     |
| M0007 |             | 0.8633 |      |     |                 |                |
| 6     | V\$GATA2_01 | 29     | 1492 | (+) | NNNGATRNNN      | GGGGATCTTC     |
| M0007 |             | 0.8709 |      |     |                 |                |
| 6     | V\$GATA2_01 | 97     | 1492 | (-) | NNNGATRNNN      | GGGGATCTTC     |
| M0007 |             | 0.8849 |      |     |                 |                |
| 5     | V\$GATA1_01 | 95     | 1508 | (-) | SNNGATNNNN      | AAAAATCTCG     |
| M0007 |             | 0.8470 |      |     |                 |                |
| 6     | V\$GATA2_01 | 91     | 1508 | (-) | NNNGATRNNN      | AAAAATCTCG     |
| M0012 |             | 0.7974 |      |     |                 |                |
| 7     | V\$GATA1_03 | 03     | 1522 | (-) | RNSNNGATAANNNGN | GTGGTTATTCTGTC |
| M0007 |             | 0.8455 |      |     |                 |                |
| 5     | V\$GATA1_01 | 08     | 1542 | (+) | SNNGATNNNN      | AGTGATGTTC     |
| M0007 |             | 0.8267 |      |     |                 |                |
| 6     | V\$GATA2_01 | 93     | 1542 | (+) | NNNGATRNNN      | AGTGATGTTC     |
| M0007 |             | 0.8667 |      |     |                 |                |
| 5     | V\$GATA1_01 | 32     | 1552 | (+) | SNNGATNNNN      | AGTGATGCTC     |
| M0007 |             | 0.8380 |      |     |                 |                |
| 6     | V\$GATA2_01 | 69     | 1552 | (+) | NNNGATRNNN      | AGTGATGCTC     |
| M0007 |             | 0.7714 |      |     |                 |                |
| 5     | V\$GATA1_01 | 71     | 1572 | (+) | SNNGATNNNN      | TGGGATCAGC     |
| M0007 |             | 0.8514 |      |     |                 |                |
| 5     | V\$GATA1_01 | 31     | 1572 | (-) | SNNGATNNNN      | TGGGATCAGC     |
| M0007 |             | 0.8403 |      |     |                 |                |
| 6     | V\$GATA2_01 | 25     | 1572 | (+) | NNNGATRNNN      | TGGGATCAGC     |
| M0007 |             | 0.8416 |      |     |                 |                |
| 6     | V\$GATA2_01 | 78     | 1572 | (-) | NNNGATRNNN      | TGGGATCAGC     |
| M0012 |             | 0.8072 |      |     |                 |                |
| 7     | V\$GATA1_03 | 02     | 1585 | (-) | RNSNNGATAANNNGN | CTTCTGTCCCCAG  |
| M0012 |             | 0.7920 |      |     |                 |                |
| 7     | V\$GATA1_03 | 14     | 1602 | (-) | RNSNNGATAANNNGN | AGTGTTATTTTCAC |

|       |             |        |      |     |                |                |
|-------|-------------|--------|------|-----|----------------|----------------|
| M0012 |             | 0.7841 |      |     |                |                |
| 7     | V\$GATA1_03 | 74     | 1605 | (-) | RNSNNGATAANNGN | GTTATTTTCACCTG |
| M0012 |             | 0.8280 |      |     |                |                |
| 7     | V\$GATA1_03 | 25     | 1619 | (-) | RNSNNGATAANNGN | CCAATTCTCCCCTT |
| M0007 |             | 0.8055 |      |     |                |                |
| 5     | V\$GATA1_01 | 28     | 1664 | (+) | SNNGATNNNN     | CTTGATTTTA     |
| M0007 |             | 0.7872 |      |     |                |                |
| 5     | V\$GATA1_01 | 66     | 1675 | (+) | SNNGATNNNN     | AAAGATTTCT     |
| M0007 |             | 0.8164 |      |     |                |                |
| 6     | V\$GATA2_01 | 19     | 1675 | (+) | NNNGATRNNN     | AAAGATTTCT     |
| M0007 |             | 0.8425 |      |     |                |                |
| 5     | V\$GATA1_01 | 47     | 1700 | (+) | SNNGATNNNN     | TCTGATGATT     |
| M0007 |             | 0.8479 |      |     |                |                |
| 6     | V\$GATA2_01 | 93     | 1700 | (+) | NNNGATRNNN     | TCTGATGATT     |
| M0007 |             | 0.8578 |      |     |                |                |
| 5     | V\$GATA1_01 | 48     | 1703 | (+) | SNNGATNNNN     | GATGATTTTC     |
| M0007 |             | 0.8294 |      |     |                |                |
| 6     | V\$GATA2_01 | 99     | 1703 | (+) | NNNGATRNNN     | GATGATTTTC     |
| M0007 |             | 0.7813 |      |     |                |                |
| 5     | V\$GATA1_01 | 43     | 1715 | (+) | SNNGATNNNN     | CAAGATTTAA     |
| M0007 |             | 0.7916 |      |     |                |                |
| 6     | V\$GATA2_01 | 1      | 1741 | (-) | NNNGATRNNN     | AAATATGGCA     |
| M0007 |             | 0.8603 |      |     |                |                |
| 5     | V\$GATA1_01 | 16     | 1761 | (-) | SNNGATNNNN     | AAACATCACT     |
| M0007 |             | 0.8304 |      |     |                |                |
| 6     | V\$GATA2_01 | 01     | 1761 | (-) | NNNGATRNNN     | AAACATCACT     |
| M0012 |             | 0.7822 |      |     |                |                |
| 7     | V\$GATA1_03 | 15     | 1769 | (-) | RNSNNGATAANNGN | CTATTTTTCATCAC |
| M0012 |             |        |      |     |                |                |
| 6     | V\$GATA1_02 | 0.845  | 1780 | (-) | NNNNNGATANKGNN | CACTGTATCTTGAT |
| M0012 |             | 0.8410 |      |     |                |                |
| 7     | V\$GATA1_03 | 09     | 1780 | (-) | RNSNNGATAANNGN | CACTGTATCTTGAT |
| M0007 |             | 0.8731 |      |     |                |                |
| 5     | V\$GATA1_01 | 49     | 1782 | (-) | SNNGATNNNN     | CTGTATCTTG     |
| M0007 |             | 0.8876 |      |     |                |                |
| 6     | V\$GATA2_01 | 86     | 1782 | (-) | NNNGATRNNN     | CTGTATCTTG     |
| M0007 |             | 0.8626 |      |     |                |                |
| 7     | V\$GATA3_01 | 5      | 1782 | (-) | NNGATARNG      | CTGTATCTT      |
| M0007 |             | 0.8647 |      |     |                |                |
| 5     | V\$GATA1_01 | 58     | 1788 | (+) | SNNGATNNNN     | CTTGATGTCT     |
| M0007 |             | 0.8010 |      |     |                |                |
| 6     | V\$GATA2_01 | 83     | 1788 | (+) | NNNGATRNNN     | CTTGATGTCT     |
| M0007 |             | 0.8204 |      |     |                |                |
| 6     | V\$GATA2_01 | 78     | 1809 | (+) | NNNGATRNNN     | TGACATAGCA     |
| M0012 |             | 0.8109 |      |     |                |                |
| 6     | V\$GATA1_02 | 37     | 1864 | (+) | NNNNNGATANKGNN | TTATACATAGGGTC |
| M0007 |             | 0.8132 |      |     |                |                |
| 6     | V\$GATA2_01 | 61     | 1878 | (-) | NNNGATRNNN     | AGTTATGCCA     |
| M0007 |             | 0.8240 |      |     |                |                |
| 6     | V\$GATA2_01 | 87     | 1894 | (-) | NNNGATRNNN     | TGGTATGCCC     |
| M0012 |             | 0.8181 |      |     |                |                |
| 6     | V\$GATA1_02 | 25     | 1913 | (-) | NNNNNGATANKGNN | TCCACTATTTAGAA |
| M0007 |             | 0.8191 |      |     |                |                |
| 6     | V\$GATA2_01 | 25     | 1929 | (+) | NNNGATRNNN     | TAAGATTTCA     |
| M0012 |             | 0.7910 |      |     |                |                |
| 7     | V\$GATA1_03 | 34     | 1942 | (-) | RNSNNGATAANNGN | TTCCTTCTCCAGAT |
| M0007 |             | 0.8415 |      |     |                |                |
| 5     | V\$GATA1_01 | 6      | 1950 | (+) | SNNGATNNNN     | CCAGATTTTA     |
| M0007 |             | 0.8173 |      |     |                |                |
| 6     | V\$GATA2_01 | 21     | 1950 | (+) | NNNGATRNNN     | CCAGATTTTA     |
| M0007 |             | 0.8272 |      |     |                |                |
| 7     | V\$GATA3_01 | 04     | 1951 | (+) | NNGATARNG      | CAGATTTTA      |
| M0007 |             | 0.7938 |      |     |                |                |
| 6     | V\$GATA2_01 | 66     | 1960 | (-) | NNNGATRNNN     | CATTATGTTG     |
| M0020 |             | 0.9083 |      |     |                |                |
| 3     | V\$GATA_C   | 57     | 2012 | (-) | NGATAAGNMNN    | TGCGTTTATCA    |

|       |             |        |      |     |                 |                |
|-------|-------------|--------|------|-----|-----------------|----------------|
| M0012 |             | 0.8421 |      |     |                 |                |
| 6     | V\$GATA1_02 | 87     | 2013 | (-) | NNNNNGATANKGNN  | GCGTTTATCAATGA |
| M0012 |             | 0.7836 |      |     |                 |                |
| 7     | V\$GATA1_03 | 84     | 2013 | (-) | RNSNNGATAANNNGN | GCGTTTATCAATGA |
| M0007 |             | 0.7976 |      |     |                 |                |
| 5     | V\$GATA1_01 | 31     | 2023 | (-) | SNNGATNNNN      | ATGAATCTAC     |
| M0020 |             | 0.9009 |      |     |                 |                |
| 3     | V\$GATA_C   | 01     | 2030 | (-) | NGATAAGNMNN     | TACTTTTATCA    |
| M0012 |             | 0.8153 |      |     |                 |                |
| 6     | V\$GATA1_02 | 13     | 2031 | (-) | NNNNNGATANKGNN  | ACTTTTATCAGTCT |
| M0012 |             | 0.9024 |      |     |                 |                |
| 7     | V\$GATA1_03 | 99     | 2031 | (-) | RNSNNGATAANNNGN | ACTTTTATCAGTCT |
| M0012 |             | 0.9304 |      |     |                 |                |
| 8     | V\$GATA1_04 | 53     | 2031 | (-) | NNCWGATARNNNN   | ACTTTTATCAGTC  |
| M0007 |             | 0.8493 |      |     |                 |                |
| 7     | V\$GATA3_01 | 58     | 2033 | (-) | NNGATARNG       | TTTTATCAG      |
| M0020 |             | 0.8328 |      |     |                 |                |
| 3     | V\$GATA_C   | 67     | 2057 | (-) | NGATAAGNMNN     | TCTAATTATCA    |
| M0012 |             | 0.7796 |      |     |                 |                |
| 6     | V\$GATA1_02 | 87     | 2058 | (-) | NNNNNGATANKGNN  | CTAATTATCATCTG |
| M0012 |             | 0.8880 |      |     |                 |                |
| 7     | V\$GATA1_03 | 45     | 2058 | (-) | RNSNNGATAANNNGN | CTAATTATCATCTG |
| M0012 |             | 0.8952 |      |     |                 |                |
| 8     | V\$GATA1_04 | 21     | 2058 | (-) | NNCWGATARNNNN   | CTAATTATCATCT  |
| M0007 |             | 0.8780 |      |     |                 |                |
| 5     | V\$GATA1_01 | 85     | 2060 | (-) | SNNGATNNNN      | AATTATCATC     |
| M0007 |             | 0.8827 |      |     |                 |                |
| 6     | V\$GATA2_01 | 24     | 2060 | (-) | NNNGATRNNN      | AATTATCATC     |
| M0007 |             | 0.8431 |      |     |                 |                |
| 7     | V\$GATA3_01 | 55     | 2060 | (-) | NNGATARNG       | AATTATCAT      |
| M0007 |             | 0.7862 |      |     |                 |                |
| 5     | V\$GATA1_01 | 78     | 2063 | (-) | SNNGATNNNN      | TATCATCTGA     |
| M0007 |             | 0.8294 |      |     |                 |                |
| 6     | V\$GATA2_01 | 99     | 2063 | (-) | NNNGATRNNN      | TATCATCTGA     |
| M0007 |             | 0.8391 |      |     |                 |                |
| 7     | V\$GATA3_01 | 67     | 2063 | (-) | NNGATARNG       | TATCATCTG      |
| M0012 |             | 0.8443 |      |     |                 |                |
| 6     | V\$GATA1_02 | 75     | 2069 | (+) | NNNNNGATANKGNN  | CTGAAGATAATTTA |
| M0012 |             | 0.8728 |      |     |                 |                |
| 7     | V\$GATA1_03 | 56     | 2069 | (+) | RNSNNGATAANNNGN | CTGAAGATAATTTA |
| M0012 |             | 0.8373 |      |     |                 |                |
| 8     | V\$GATA1_04 | 16     | 2070 | (+) | NNCWGATARNNNN   | TGAAGATAATTTA  |
| M0007 |             | 0.8573 |      |     |                 |                |
| 5     | V\$GATA1_01 | 54     | 2071 | (+) | SNNGATNNNN      | GAAGATAATT     |
| M0007 |             | 0.8940 |      |     |                 |                |
| 6     | V\$GATA2_01 | 01     | 2071 | (+) | NNNGATRNNN      | GAAGATAATT     |
| M0007 |             | 0.8666 |      |     |                 |                |
| 7     | V\$GATA3_01 | 37     | 2072 | (+) | NNGATARNG       | AAGATAATT      |
| M0020 |             | 0.8580 |      |     |                 |                |
| 3     | V\$GATA_C   | 3      | 2073 | (+) | NGATAAGNMNN     | AGATAATTTAA    |
| M0007 |             | 0.7947 |      |     |                 |                |
| 6     | V\$GATA2_01 | 68     | 2100 | (-) | NNNGATRNNN      | AAATATGTGA     |
| M0007 |             | 0.7912 |      |     |                 |                |
| 5     | V\$GATA1_01 | 14     | 2105 | (+) | SNNGATNNNN      | TGTGATTATA     |
| M0007 |             | 0.7821 |      |     |                 |                |
| 6     | V\$GATA2_01 | 38     | 2105 | (+) | NNNGATRNNN      | TGTGATTATA     |
| M0007 |             | 0.8586 |      |     |                 |                |
| 7     | V\$GATA3_01 | 62     | 2106 | (+) | NNGATARNG       | GTGATTATA      |
| M0012 |             | 0.8233 |      |     |                 |                |
| 7     | V\$GATA1_03 | 71     | 2106 | (+) | RNSNNGATAANNNGN | GTGATTATAAGGAG |
| M0012 |             | 0.7905 |      |     |                 |                |
| 7     | V\$GATA1_03 | 44     | 2106 | (-) | RNSNNGATAANNNGN | GTGATTATAAGGAG |
| M0012 |             | 0.8013 |      |     |                 |                |
| 7     | V\$GATA1_03 | 23     | 2133 | (-) | RNSNNGATAANNNGN | TTAATTAGCTTCTT |
| M0020 |             | 0.9105 |      |     |                 |                |
| 3     | V\$GATA_C   | 31     | 2140 | (-) | NGATAAGNMNN     | GCTTCTTATCT    |

|       |             |        |      |     |                 |                |
|-------|-------------|--------|------|-----|-----------------|----------------|
| M0012 |             | 0.8571 |      |     |                 |                |
| 6     | V\$GATA1_02 | 87     | 2141 | (-) | NNNNNGATANKGNN  | CTTCTTATCTATTT |
| M0012 |             | 0.8978 |      |     |                 |                |
| 7     | V\$GATA1_03 | 44     | 2141 | (-) | RNSNNGATAANNNGN | CTTCTTATCTATTT |
| M0012 |             | 0.9129 |      |     |                 |                |
| 8     | V\$GATA1_04 | 9      | 2141 | (-) | NNCWGATARNNNN   | CTTCTTATCTATT  |
| M0007 |             | 0.8949 |      |     |                 |                |
| 7     | V\$GATA3_01 | 93     | 2143 | (-) | NNGATARNG       | TCTTATCTA      |
| M0007 |             | 0.7778 |      |     |                 |                |
| 5     | V\$GATA1_01 | 87     | 2157 | (+) | SNNGATNNNN      | CAGGATCAAG     |
| M0007 |             | 0.8460 |      |     |                 |                |
| 5     | V\$GATA1_01 | 02     | 2157 | (-) | SNNGATNNNN      | CAGGATCAAG     |
| M0007 |             | 0.8114 |      |     |                 |                |
| 6     | V\$GATA2_01 | 57     | 2157 | (+) | NNNGATRNNN      | CAGGATCAAG     |
| M0012 |             | 0.8116 |      |     |                 |                |
| 7     | V\$GATA1_03 | 12     | 2184 | (-) | RNSNNGATAANNNGN | ATTTTTACCTGCCT |
| M0012 |             | 0.7836 |      |     |                 |                |
| 7     | V\$GATA1_03 | 84     | 2223 | (+) | RNSNNGATAANNNGN | GTAAGTATAATAAG |
| M0012 |             | 0.7956 |      |     |                 |                |
| 6     | V\$GATA1_02 | 25     | 2231 | (+) | NNNNNGATANKGNN  | AATAAGATACAGAT |
| M0012 |             | 0.8563 |      |     |                 |                |
| 8     | V\$GATA1_04 | 11     | 2232 | (+) | NNCWGATARNNNN   | ATAAGATACAGAT  |
| M0007 |             | 0.8124 |      |     |                 |                |
| 5     | V\$GATA1_01 | 38     | 2233 | (+) | SNNGATNNNN      | TAAGATACAG     |
| M0007 |             | 0.8786 |      |     |                 |                |
| 6     | V\$GATA2_01 | 65     | 2233 | (+) | NNNGATRNNN      | TAAGATACAG     |
| M0007 |             | 0.8626 |      |     |                 |                |
| 7     | V\$GATA3_01 | 5      | 2234 | (+) | NNGATARNG       | AAGATACAG      |
| M0020 |             | 0.8536 |      |     |                 |                |
| 3     | V\$GATA_C   | 81     | 2235 | (+) | NGATAAGNMNN     | AGATACAGATG    |
| M0012 |             | 0.7939 |      |     |                 |                |
| 7     | V\$GATA1_03 | 74     | 2237 | (+) | RNSNNGATAANNNGN | ATACAGATGATAAT |
| M0007 |             | 0.7778 |      |     |                 |                |
| 5     | V\$GATA1_01 | 87     | 2239 | (+) | SNNGATNNNN      | ACAGATGATA     |
| M0007 |             | 0.7970 |      |     |                 |                |
| 6     | V\$GATA2_01 | 23     | 2239 | (+) | NNNGATRNNN      | ACAGATGATA     |
| M0007 |             | 0.8391 |      |     |                 |                |
| 7     | V\$GATA3_01 | 67     | 2240 | (+) | NNGATARNG       | CAGATGATA      |
| M0012 |             |        |      |     |                 |                |
| 6     | V\$GATA1_02 | 0.8325 | 2240 | (+) | NNNNNGATANKGNN  | CAGATGATAATATA |
| M0012 |             | 0.8561 |      |     |                 |                |
| 7     | V\$GATA1_03 | 98     | 2240 | (+) | RNSNNGATAANNNGN | CAGATGATAATATA |
| M0012 |             | 0.8462 |      |     |                 |                |
| 8     | V\$GATA1_04 | 01     | 2241 | (+) | NNCWGATARNNNN   | AGATGATAATATA  |
| M0007 |             | 0.8425 |      |     |                 |                |
| 5     | V\$GATA1_01 | 47     | 2242 | (+) | SNNGATNNNN      | GATGATAATA     |
| M0007 |             | 0.8529 |      |     |                 |                |
| 6     | V\$GATA2_01 | 54     | 2242 | (+) | NNNGATRNNN      | GATGATAATA     |
| M0007 |             | 0.8750 |      |     |                 |                |
| 7     | V\$GATA3_01 | 55     | 2243 | (+) | NNGATARNG       | ATGATAATA      |
| M0020 |             | 0.8511 |      |     |                 |                |
| 3     | V\$GATA_C   | 96     | 2244 | (+) | NGATAAGNMNN     | TGATAATATAT    |
| M0012 |             | 0.7841 |      |     |                 |                |
| 7     | V\$GATA1_03 | 74     | 2258 | (+) | RNSNNGATAANNNGN | GTAAATATAAGAAT |
| M0012 |             | 0.7822 |      |     |                 |                |
| 7     | V\$GATA1_03 | 15     | 2278 | (-) | RNSNNGATAANNNGN | TTGTTTATGAGGAT |
| M0012 |             | 0.8193 |      |     |                 |                |
| 6     | V\$GATA1_02 | 75     | 2284 | (+) | NNNNNGATANKGNN  | ATGAGGATAATGTC |
| M0012 |             | 0.9213 |      |     |                 |                |
| 7     | V\$GATA1_03 | 62     | 2284 | (+) | RNSNNGATAANNNGN | ATGAGGATAATGTC |
| M0007 |             | 0.8642 |      |     |                 |                |
| 5     | V\$GATA1_01 | 65     | 2286 | (+) | SNNGATNNNN      | GAGGATAATG     |
| M0007 |             | 0.9215 |      |     |                 |                |
| 6     | V\$GATA2_01 | 16     | 2286 | (+) | NNNGATRNNN      | GAGGATAATG     |
| M0007 |             | 0.8883 |      |     |                 |                |
| 7     | V\$GATA3_01 | 47     | 2287 | (+) | NNGATARNG       | AGGATAATG      |

|       |             |        |      |     |                 |                |
|-------|-------------|--------|------|-----|-----------------|----------------|
| M0020 |             | 0.8633 |      |     |                 |                |
| 3     | V\$GATA_C   | 12     | 2288 | (+) | NGATAAGNMNN     | GGATAATGTCA    |
| M0012 |             | 0.8236 |      |     |                 |                |
| 7     | V\$GATA1_03 | 16     | 2300 | (+) | RNSNNGATAANNNGN | GGGTAGACAGCAGG |
| M0007 |             | 0.8430 |      |     |                 |                |
| 5     | V\$GATA1_01 | 4      | 2353 | (+) | SNNGATNNNN      | AAAGATGGCC     |
| M0007 |             | 0.8854 |      |     |                 |                |
| 6     | V\$GATA2_01 | 31     | 2353 | (+) | NNNGATRNNN      | AAAGATGGCC     |
| M0007 |             | 0.8254 |      |     |                 |                |
| 7     | V\$GATA3_01 | 32     | 2354 | (+) | NNGATARNG       | AAGATGGCC      |
| M0012 |             | 0.7851 |      |     |                 |                |
| 7     | V\$GATA1_03 | 54     | 2385 | (+) | RNSNNGATAANNNGN | ATGAAGATGGACAA |
| M0007 |             | 0.8682 |      |     |                 |                |
| 5     | V\$GATA1_01 | 13     | 2387 | (+) | SNNGATNNNN      | GAAGATGGAC     |
| M0007 |             | 0.8732 |      |     |                 |                |
| 6     | V\$GATA2_01 | 52     | 2387 | (+) | NNNGATRNNN      | GAAGATGGAC     |
| M0007 |             | 0.8214 |      |     |                 |                |
| 7     | V\$GATA3_01 | 44     | 2388 | (+) | NNGATARNG       | AAGATGGAC      |
| M0020 |             | 0.8390 |      |     |                 |                |
| 3     | V\$GATA_C   | 8      | 2393 | (+) | NGATAAGNMNN     | GGACAAAAATA    |
| M0007 |             | 0.8149 |      |     |                 |                |
| 5     | V\$GATA1_01 | 06     | 2427 | (+) | SNNGATNNNN      | TAGGATTGGA     |
| M0007 |             | 0.8574 |      |     |                 |                |
| 6     | V\$GATA2_01 | 65     | 2427 | (+) | NNNGATRNNN      | TAGGATTGGA     |
| M0007 |             | 0.8688 |      |     |                 |                |
| 7     | V\$GATA3_01 | 52     | 2428 | (+) | NNGATARNG       | AGGATTGGA      |
| M0007 |             | 0.7872 |      |     |                 |                |
| 5     | V\$GATA1_01 | 66     | 2436 | (+) | SNNGATNNNN      | AAAGATTTTT     |
| M0007 |             | 0.7974 |      |     |                 |                |
| 6     | V\$GATA2_01 | 74     | 2436 | (+) | NNNGATRNNN      | AAAGATTTTT     |
| M0007 |             | 0.8430 |      |     |                 |                |
| 5     | V\$GATA1_01 | 4      | 2516 | (-) | SNNGATNNNN      | GAGAATCACT     |
| M0007 |             | 0.8019 |      |     |                 |                |
| 6     | V\$GATA2_01 | 85     | 2516 | (-) | NNNGATRNNN      | GAGAATCACT     |
| M0007 |             | 0.8223 |      |     |                 |                |
| 5     | V\$GATA1_01 | 1      | 2596 | (+) | SNNGATNNNN      | GTAGATTCCC     |
| M0007 |             | 0.7893 |      |     |                 |                |
| 6     | V\$GATA2_01 | 55     | 2596 | (+) | NNNGATRNNN      | GTAGATTCCC     |
| M0007 |             | 0.8864 |      |     |                 |                |
| 5     | V\$GATA1_01 | 76     | 2607 | (-) | SNNGATNNNN      | AACCATCTCT     |
| M0007 |             | 0.8782 |      |     |                 |                |
| 6     | V\$GATA2_01 | 14     | 2607 | (-) | NNNGATRNNN      | AACCATCTCT     |
| M0007 |             | 0.8586 |      |     |                 |                |
| 7     | V\$GATA3_01 | 62     | 2607 | (-) | NNGATARNG       | AACCATCTC      |
| M0007 |             | 0.7974 |      |     |                 |                |
| 6     | V\$GATA2_01 | 74     | 2620 | (-) | NNNGATRNNN      | GCATATGTCA     |
| M0012 |             | 0.8159 |      |     |                 |                |
| 6     | V\$GATA1_02 | 37     | 2672 | (+) | NNNNNGATANKGNN  | ACTTTGATAGGAAA |
| M0012 |             | 0.7814 |      |     |                 |                |
| 7     | V\$GATA1_03 | 8      | 2672 | (+) | RNSNNGATAANNNGN | ACTTTGATAGGAAA |
| M0012 |             | 0.8106 |      |     |                 |                |
| 8     | V\$GATA1_04 | 62     | 2673 | (+) | NNCWGATARNNNN   | CTTTGATAGGAAA  |
| M0007 |             | 0.8277 |      |     |                 |                |
| 5     | V\$GATA1_01 | 39     | 2674 | (+) | SNNGATNNNN      | TTTGATAGGA     |
| M0007 |             | 0.8146 |      |     |                 |                |
| 6     | V\$GATA2_01 | 14     | 2674 | (+) | NNNGATRNNN      | TTTGATAGGA     |
| M0007 |             | 0.8998 |      |     |                 |                |
| 7     | V\$GATA3_01 | 67     | 2675 | (+) | NNGATARNG       | TTGATAGGA      |
| M0020 |             | 0.9095 |      |     |                 |                |
| 3     | V\$GATA_C   | 99     | 2676 | (+) | NGATAAGNMNN     | TGATAGGAAAC    |
| M0007 |             | 0.7714 |      |     |                 |                |
| 5     | V\$GATA1_01 | 71     | 2680 | (-) | SNNGATNNNN      | AGGAAACAGG     |
| M0007 |             | 0.8474 |      |     |                 |                |
| 5     | V\$GATA1_01 | 83     | 2687 | (+) | SNNGATNNNN      | AGGGATGTGT     |
| M0007 |             | 0.8624 |      |     |                 |                |
| 6     | V\$GATA2_01 | 27     | 2687 | (+) | NNNGATRNNN      | AGGGATGTGT     |



|       |             |        |      |     |                 |                |
|-------|-------------|--------|------|-----|-----------------|----------------|
| M0007 |             | 0.8010 |      |     |                 |                |
| 5     | V\$GATA1_01 | 86     | 2715 | (+) | SNNGATNNNN      | GGAGTTGGGC     |
| M0007 |             | 0.8326 |      |     |                 |                |
| 5     | V\$GATA1_01 | 75     | 2746 | (-) | SNNGATNNNN      | AAGAATCCAC     |
| M0007 |             | 0.7884 |      |     |                 |                |
| 6     | V\$GATA2_01 | 53     | 2746 | (-) | NNNGATRNNN      | AAGAATCCAC     |
| M0007 |             | 0.8070 |      |     |                 |                |
| 5     | V\$GATA1_01 | 09     | 2777 | (-) | SNNGATNNNN      | TTCCATCCCT     |
| M0007 |             | 0.8227 |      |     |                 |                |
| 6     | V\$GATA2_01 | 33     | 2777 | (-) | NNNGATRNNN      | TTCCATCCCT     |
| M0007 |             | 0.8254 |      |     |                 |                |
| 7     | V\$GATA3_01 | 32     | 2777 | (-) | NNGATARNG       | TTCCATCCC      |
| M0012 |             | 0.7861 |      |     |                 |                |
| 7     | V\$GATA1_03 | 34     | 2792 | (+) | RNSNNGATAANNNGN | AGGAAGATCCCATG |
| M0007 |             | 0.8099 |      |     |                 |                |
| 5     | V\$GATA1_01 | 7      | 2794 | (+) | SNNGATNNNN      | GAAGATCCCA     |
| M0007 |             | 0.7773 |      |     |                 |                |
| 5     | V\$GATA1_01 | 94     | 2794 | (-) | SNNGATNNNN      | GAAGATCCCA     |
| M0007 |             | 0.8448 |      |     |                 |                |
| 6     | V\$GATA2_01 | 35     | 2794 | (+) | NNNGATRNNN      | GAAGATCCCA     |
| M0007 |             | 0.8488 |      |     |                 |                |
| 6     | V\$GATA2_01 | 95     | 2794 | (-) | NNNGATRNNN      | GAAGATCCCA     |
| M0012 |             | 0.7843 |      |     |                 |                |
| 6     | V\$GATA1_02 | 75     | 2945 | (+) | NNNNNGATANKGNN  | TGCCAGATAACCTA |
| M0012 |             | 0.8221 |      |     |                 |                |
| 7     | V\$GATA1_03 | 46     | 2945 | (+) | RNSNNGATAANNNGN | TGCCAGATAACCTA |
| M0012 |             | 0.8691 |      |     |                 |                |
| 8     | V\$GATA1_04 | 79     | 2946 | (+) | NNCWGATARNNNN   | GCCAGATAACCTA  |
| M0007 |             | 0.8677 |      |     |                 |                |
| 5     | V\$GATA1_01 | 2      | 2947 | (+) | SNNGATNNNN      | CCAGATAACC     |
| M0007 |             | 0.9120 |      |     |                 |                |
| 6     | V\$GATA2_01 | 43     | 2947 | (+) | NNNGATRNNN      | CCAGATAACC     |
| M0007 |             | 0.8449 |      |     |                 |                |
| 7     | V\$GATA3_01 | 27     | 2948 | (+) | NNGATARNG       | CAGATAACC      |
| M0020 |             | 0.8471 |      |     |                 |                |
| 3     | V\$GATA_C   | 58     | 2949 | (+) | NGATAAGNMNN     | AGATAACCTAA    |
| M0007 |             | 0.8869 |      |     |                 |                |
| 5     | V\$GATA1_01 | 69     | 2988 | (-) | SNNGATNNNN      | CAACATCTTC     |
| M0007 |             | 0.8935 |      |     |                 |                |
| 6     | V\$GATA2_01 | 5      | 2988 | (-) | NNNGATRNNN      | CAACATCTTC     |
| M0007 |             | 0.8480 |      |     |                 |                |
| 7     | V\$GATA3_01 | 28     | 2988 | (-) | NNGATARNG       | CAACATCTT      |
| M0020 |             | 0.8819 |      |     |                 |                |
| 3     | V\$GATA_C   | 51     | 3018 | (-) | NGATAAGNMNN     | TATTCATATCA    |
| M0012 |             | 0.8838 |      |     |                 |                |
| 8     | V\$GATA1_04 | 85     | 3019 | (-) | NNCWGATARNNNN   | ATTCATATCATAC  |
| M0007 |             | 0.8168 |      |     |                 |                |
| 5     | V\$GATA1_01 | 81     | 3021 | (-) | SNNGATNNNN      | TCATATCATA     |
| M0007 |             | 0.8597 |      |     |                 |                |
| 6     | V\$GATA2_01 | 2      | 3021 | (-) | NNNGATRNNN      | TCATATCATA     |
| M0007 |             | 0.8639 |      |     |                 |                |
| 7     | V\$GATA3_01 | 79     | 3021 | (-) | NNGATARNG       | TCATATCAT      |
| M0012 |             | 0.8246 |      |     |                 |                |
| 6     | V\$GATA1_02 | 88     | 3030 | (+) | NNNNNGATANKGNN  | ACAGTGATAAAGAA |
| M0012 |             | 0.8561 |      |     |                 |                |
| 7     | V\$GATA1_03 | 98     | 3030 | (+) | RNSNNGATAANNNGN | ACAGTGATAAAGAA |
| M0012 |             | 0.8339 |      |     |                 |                |
| 8     | V\$GATA1_04 | 46     | 3031 | (+) | NNCWGATARNNNN   | CAGTGATAAAGAA  |
| M0007 |             | 0.8139 |      |     |                 |                |
| 5     | V\$GATA1_01 | 19     | 3032 | (+) | SNNGATNNNN      | AGTGATAAAG     |
| M0007 |             | 0.8168 |      |     |                 |                |
| 6     | V\$GATA2_01 | 7      | 3032 | (+) | NNNGATRNNN      | AGTGATAAAG     |
| M0007 |             | 0.9073 |      |     |                 |                |
| 7     | V\$GATA3_01 | 99     | 3033 | (+) | NNGATARNG       | GTGATAAAG      |
| M0020 |             | 0.9058 |      |     |                 |                |
| 3     | V\$GATA_C   | 71     | 3034 | (+) | NGATAAGNMNN     | TGATAAAGAAG    |

|       |             |        |      |     |                 |                |
|-------|-------------|--------|------|-----|-----------------|----------------|
| M0007 |             | 0.8652 |      |     |                 |                |
| 5     | V\$GATA1_01 | 52     | 3047 | (+) | SNNGATNNNN      | CTAGATGCTT     |
| M0007 |             | 0.8046 |      |     |                 |                |
| 6     | V\$GATA2_01 | 91     | 3047 | (+) | NNNGATRNNN      | CTAGATGCTT     |
| M0012 |             | 0.8868 |      |     |                 |                |
| 6     | V\$GATA1_02 | 75     | 3070 | (+) | NNNNNGATANKGNN  | TTGAAGATACAGGC |
| M0012 |             | 0.8032 |      |     |                 |                |
| 7     | V\$GATA1_03 | 83     | 3070 | (+) | RNSNNGATAANNNGN | TTGAAGATACAGGC |
| M0012 |             | 0.8419 |      |     |                 |                |
| 8     | V\$GATA1_04 | 12     | 3071 | (+) | NNCWGATARNNNN   | TGAAGATACAGGC  |
| M0007 |             | 0.8687 |      |     |                 |                |
| 5     | V\$GATA1_01 | 07     | 3072 | (+) | SNNGATNNNN      | GAAGATACAG     |
| M0007 |             | 0.8930 |      |     |                 |                |
| 6     | V\$GATA2_01 | 99     | 3072 | (+) | NNNGATRNNN      | GAAGATACAG     |
| M0007 |             | 0.8626 |      |     |                 |                |
| 7     | V\$GATA3_01 | 5      | 3073 | (+) | NNGATARNG       | AAGATACAG      |
| M0020 |             | 0.8810 |      |     |                 |                |
| 3     | V\$GATA_C   | 19     | 3074 | (+) | NGATAAGNMNN     | AGATACAGGCT    |
| M0007 |             | 0.8193 |      |     |                 |                |
| 5     | V\$GATA1_01 | 48     | 3085 | (-) | SNNGATNNNN      | TGCAATCTGT     |
| M0007 |             | 0.8313 |      |     |                 |                |
| 6     | V\$GATA2_01 | 04     | 3085 | (-) | NNNGATRNNN      | TGCAATCTGT     |
| M0007 |             | 0.8715 |      |     |                 |                |
| 7     | V\$GATA3_01 | 11     | 3085 | (-) | NNGATARNG       | TGCAATCTG      |
| M0007 |             |        |      |     |                 |                |
| 6     | V\$GATA2_01 | 0.7871 | 3090 | (+) | NNNGATRNNN      | TCTGTTAGCT     |
| M0012 |             | 0.8637 |      |     |                 |                |
| 7     | V\$GATA1_03 | 92     | 3090 | (-) | RNSNNGATAANNNGN | TCTGTTAGCTCCCT |
| M0020 |             | 0.9341 |      |     |                 |                |
| 3     | V\$GATA_C   | 41     | 3122 | (-) | NGATAAGNMNN     | TTCCCTTATCC    |
| M0012 |             | 0.8637 |      |     |                 |                |
| 6     | V\$GATA1_02 | 5      | 3123 | (-) | NNNNNGATANKGNN  | TCCCTTATCCTGCA |
| M0012 |             | 0.8508 |      |     |                 |                |
| 7     | V\$GATA1_03 | 08     | 3123 | (-) | RNSNNGATAANNNGN | TCCCTTATCCTGCA |
| M0012 |             | 0.8694 |      |     |                 |                |
| 8     | V\$GATA1_04 | 85     | 3123 | (-) | NNCWGATARNNNN   | TCCCTTATCCTGC  |
| M0007 |             | 0.8810 |      |     |                 |                |
| 5     | V\$GATA1_01 | 46     | 3125 | (-) | SNNGATNNNN      | CCTTATCCTG     |
| M0007 |             | 0.9224 |      |     |                 |                |
| 6     | V\$GATA2_01 | 18     | 3125 | (-) | NNNGATRNNN      | CCTTATCCTG     |
| M0007 |             | 0.9091 |      |     |                 |                |
| 7     | V\$GATA3_01 | 71     | 3125 | (-) | NNGATARNG       | CCTTATCCT      |
| M0007 |             | 0.7887 |      |     |                 |                |
| 5     | V\$GATA1_01 | 46     | 3145 | (-) | SNNGATNNNN      | TGCCAACACC     |
| M0012 |             |        |      |     |                 |                |
| 6     | V\$GATA1_02 | 0.78   | 3179 | (+) | NNNNNGATANKGNN  | GTCAGATTGGGCT  |
| M0012 |             | 0.8201 |      |     |                 |                |
| 8     | V\$GATA1_04 | 59     | 3180 | (+) | NNCWGATARNNNN   | TTGAGATTGGGCT  |
| M0007 |             | 0.8869 |      |     |                 |                |
| 5     | V\$GATA1_01 | 69     | 3181 | (+) | SNNGATNNNN      | TCAGATTGGG     |
| M0007 |             | 0.8940 |      |     |                 |                |
| 6     | V\$GATA2_01 | 01     | 3181 | (+) | NNNGATRNNN      | TCAGATTGGG     |
| M0007 |             | 0.9432 |      |     |                 |                |
| 7     | V\$GATA3_01 | 88     | 3182 | (+) | NNGATARNG       | CAGATTGGG      |
| M0020 |             | 0.8359 |      |     |                 |                |
| 3     | V\$GATA_C   | 74     | 3187 | (-) | NGATAAGNMNN     | TGGGCTTCTCT    |
| M0020 |             | 0.8403 |      |     |                 |                |
| 3     | V\$GATA_C   | 23     | 3209 | (+) | NGATAAGNMNN     | TGCTAAGGACT    |
| M0007 |             | 0.7875 |      |     |                 |                |
| 6     | V\$GATA2_01 | 51     | 3225 | (+) | NNNGATRNNN      | TGCCATGCTG     |
| M0007 |             | 0.8073 |      |     |                 |                |
| 6     | V\$GATA2_01 | 97     | 3225 | (-) | NNNGATRNNN      | TGCCATGCTG     |
| M0012 |             | 0.8023 |      |     |                 |                |
| 7     | V\$GATA1_03 | 03     | 3243 | (+) | RNSNNGATAANNNGN | GGTTTGATACCAGG |
| M0007 |             | 0.7897 |      |     |                 |                |
| 5     | V\$GATA1_01 | 33     | 3245 | (+) | SNNGATNNNN      | TTTGATACCA     |

|       |             |        |      |     |                      |                      |
|-------|-------------|--------|------|-----|----------------------|----------------------|
| M0007 |             | 0.8019 |      |     |                      |                      |
| 6     | V\$GATA2_01 | 85     | 3245 | (+) | NNNGATRNNN           | TTTGATACCA           |
| M0007 |             | 0.8307 |      |     |                      |                      |
| 5     | V\$GATA1_01 | 01     | 3262 | (+) | SNNGATNNNN           | GAAGATCCCC           |
| M0007 |             | 0.8336 |      |     |                      |                      |
| 5     | V\$GATA1_01 | 62     | 3262 | (-) | SNNGATNNNN           | GAAGATCCCC           |
| M0007 |             | 0.8709 |      |     |                      |                      |
| 6     | V\$GATA2_01 | 97     | 3262 | (+) | NNNGATRNNN           | GAAGATCCCC           |
| M0007 |             | 0.8633 |      |     |                      |                      |
| 6     | V\$GATA2_01 | 29     | 3262 | (-) | NNNGATRNNN           | GAAGATCCCC           |
| M0007 |             | 0.7749 |      |     |                      |                      |
| 5     | V\$GATA1_01 | 26     | 3335 | (+) | SNNGATNNNN           | CCAGAGGGTT           |
| M0012 |             | 0.7834 |      |     |                      |                      |
| 7     | V\$GATA1_03 | 39     | 3351 | (+) | RNSNNGATAANNNGN      | AGTCAGATACTTTC       |
| M0007 |             | 0.8613 |      |     |                      |                      |
| 5     | V\$GATA1_01 | 03     | 3353 | (+) | SNNGATNNNN           | TCAGATACTT           |
| M0007 |             | 0.9138 |      |     |                      |                      |
| 6     | V\$GATA2_01 | 48     | 3353 | (+) | NNNGATRNNN           | TCAGATACTT           |
| M0012 |             | 0.8164 |      |     |                      |                      |
| 8     | V\$GATA1_04 | 83     | 3373 | (-) | NNCWGATARNNNN        | TCACCTTTCAGAT        |
| M0022 |             | 0.7204 |      |     |                      | CTTCCTTTTAGGAAAA-    |
| 4     | V\$STAT1_01 | 02     | 23   | (+) | NNNSANTTCCGGAANTGNSN | GAGGT                |
| M0022 |             | 0.8535 |      |     |                      |                      |
| 3     | V\$STAT_01  | 42     | 28   | (-) | TTCCCRKAA            | TTTTAGGAA            |
| M0022 |             | 0.8026 |      |     |                      |                      |
| 3     | V\$STAT_01  | 22     | 30   | (-) | TTCCCRKAA            | TTAGGAAAA            |
| M0022 |             | 0.8167 |      |     |                      |                      |
| 3     | V\$STAT_01  | 38     | 108  | (-) | TTCCCRKAA            | TTCCAAAAA            |
| M0022 |             | 0.8096 |      |     |                      |                      |
| 3     | V\$STAT_01  | 8      | 213  | (+) | TTCCCRKAA            | TTCTTAAAA            |
| M0022 |             | 0.7958 |      |     |                      |                      |
| 3     | V\$STAT_01  | 15     | 236  | (+) | TTCCCRKAA            | ATACTAGAA            |
| M0022 |             | 0.8326 |      |     |                      |                      |
| 3     | V\$STAT_01  | 19     | 721  | (+) | TTCCCRKAA            | ATCCTATAA            |
| M0022 |             | 0.7995 |      |     |                      |                      |
| 3     | V\$STAT_01  | 97     | 756  | (+) | TTCCCRKAA            | TTAGTAGAA            |
| M0022 |             | 0.8099 |      |     |                      |                      |
| 3     | V\$STAT_01  | 32     | 756  | (-) | TTCCCRKAA            | TTAGTAGAA            |
| M0022 |             | 0.8328 |      |     |                      |                      |
| 3     | V\$STAT_01  | 71     | 1033 | (+) | TTCCCRKAA            | TTCCAGGCA            |
| M0022 |             | 0.8568 |      |     |                      |                      |
| 3     | V\$STAT_01  | 19     | 1033 | (-) | TTCCCRKAA            | TTCCAGGCA            |
| M0022 |             | 0.7783 |      |     |                      |                      |
| 4     | V\$STAT1_01 | 63     | 1162 | (-) | NNNSANTTCCGGAANTGNSN | CCTCTGTTCTGGGATTCTCC |
| M0022 |             | 0.8585 |      |     |                      |                      |
| 3     | V\$STAT_01  | 83     | 1168 | (+) | TTCCCRKAA            | TTCTGGGA             |
| M0022 |             | 0.8328 |      |     |                      |                      |
| 3     | V\$STAT_01  | 71     | 1319 | (+) | TTCCCRKAA            | TTCCAGGCA            |
| M0022 |             | 0.8568 |      |     |                      |                      |
| 3     | V\$STAT_01  | 19     | 1319 | (-) | TTCCCRKAA            | TTCCAGGCA            |
| M0022 |             | 0.7917 |      |     |                      |                      |
| 3     | V\$STAT_01  | 82     | 1355 | (+) | TTCCCRKAA            | TTCTCTGCA            |
| M0022 |             | 0.8046 |      |     |                      |                      |
| 3     | V\$STAT_01  | 38     | 1592 | (+) | TTCCCRKAA            | TCCCCAGCA            |
| M0022 |             | 0.7925 |      |     |                      |                      |
| 3     | V\$STAT_01  | 38     | 1754 | (+) | TTCCCRKAA            | TTAGTATAA            |
| M0022 |             | 0.9223 |      |     |                      |                      |
| 3     | V\$STAT_01  | 59     | 1980 | (+) | TTCCCRKAA            | TTCTTGTA             |
| M0022 |             | 0.8336 |      |     |                      |                      |
| 3     | V\$STAT_01  | 27     | 1980 | (-) | TTCCCRKAA            | TTCTTGTA             |
| M0022 |             | 0.8154 |      |     |                      |                      |
| 3     | V\$STAT_01  | 78     | 2282 | (-) | TTCCCRKAA            | TTATGAGGA            |
| M0022 |             | 0.8096 |      |     |                      |                      |
| 3     | V\$STAT_01  | 8      | 2285 | (-) | TTCCCRKAA            | TGAGGATAA            |
| M0022 |             | 0.8396 |      |     |                      |                      |
| 3     | V\$STAT_01  | 77     | 2424 | (-) | TTCCCRKAA            | TTCTAGGAT            |

|       |            |        |      |     |                        |                       |
|-------|------------|--------|------|-----|------------------------|-----------------------|
| M0022 |            | 0.8298 |      |     |                        |                       |
| 3     | V\$STAT_01 | 46     | 2512 | (+) | TTCCCRKAA              | CTCCGAGAA             |
| M0022 |            | 0.8396 |      |     |                        |                       |
| 3     | V\$STAT_01 | 77     | 2512 | (-) | TTCCCRKAA              | CTCCGAGAA             |
| M0022 |            | 0.8096 |      |     |                        |                       |
| 3     | V\$STAT_01 | 8      | 2525 | (+) | TTCCCRKAA              | TTCTTAAAA             |
| M0022 |            | 0.8197 |      |     |                        |                       |
| 3     | V\$STAT_01 | 63     | 2562 | (+) | TTCCCRKAA              | TTCTTTTAA             |
| M0022 |            | 0.8873 |      |     |                        |                       |
| 3     | V\$STAT_01 | 2      | 2676 | (-) | TTCCCRKAA              | TGATAGGAA             |
| M0022 |            | 0.7958 |      |     |                        |                       |
| 3     | V\$STAT_01 | 15     | 2995 | (-) | TTCCCRKAA              | TTCTAGTGA             |
| M0022 |            | 0.8535 |      |     |                        |                       |
| 3     | V\$STAT_01 | 42     | 3009 | (-) | TTCCCRKAA              | TTACAGAAA             |
| M0013 |            | 0.8490 |      |     |                        |                       |
| 7     | V\$OCT1_03 | 72     | 39   | (+) | NNNRTAATNANNN          | GAGGTAATATTTT         |
| M0013 |            | 0.8787 |      |     |                        | AGGTAA-               |
| 8     | V\$OCT1_04 | 12     | 40   | (-) | NNNNNNNWATGCAAATNNNWNW | TATTTTCATTTATCTTT     |
| M0013 |            | 0.7888 |      |     |                        |                       |
| 5     | V\$OCT1_01 | 21     | 42   | (-) | NNNNWTATGCAAATNTNNN    | GTAATATTTTCATTTATCT   |
| M0016 |            |        |      |     |                        |                       |
| 2     | V\$OCT1_06 | 0.9375 | 44   | (+) | CWNAWTKWSATRYN         | AATATTTTCATTTA        |
| M0019 |            | 0.8223 |      |     |                        |                       |
| 5     | V\$OCT1_Q6 | 25     | 44   | (-) | NNNNATGCAAATNAN        | AATATTTTCATTTAT       |
| M0024 |            | 0.8123 |      |     |                        |                       |
| 8     | V\$OCT1_07 | 81     | 44   | (+) | TNTATGNTAATT           | AATATTTTCATT          |
| M0013 |            | 0.7917 |      |     |                        | TATTTTCATTTATCTTTTGC- |
| 8     | V\$OCT1_04 | 19     | 46   | (-) | NNNNNNNWATGCAAATNNNWNW | TA                    |
| M0013 |            | 0.7321 |      |     |                        |                       |
| 5     | V\$OCT1_01 | 63     | 57   | (+) | NNNNWTATGCAAATNTNNN    | ATCTTTTTGCTATTCTATG   |
| M0016 |            | 0.8054 |      |     |                        |                       |
| 2     | V\$OCT1_06 | 69     | 57   | (+) | CWNAWTKWSATRYN         | ATCTTTTTGCTATT        |
| M0016 |            | 0.8343 |      |     |                        |                       |
| 2     | V\$OCT1_06 | 75     | 76   | (+) | CWNAWTKWSATRYN         | TACCTTGTAATATT        |
| M0016 |            | 0.8066 |      |     |                        |                       |
| 2     | V\$OCT1_06 | 41     | 77   | (-) | CWNAWTKWSATRYN         | ACCTTGTAATATTG        |
| M0013 |            | 0.8846 |      |     |                        |                       |
| 7     | V\$OCT1_03 | 31     | 79   | (+) | NNNRTAATNANNN          | CTTGTAATATTGT         |
| M0013 |            | 0.7869 |      |     |                        | AAGTATTTTTTAAA-       |
| 8     | V\$OCT1_04 | 09     | 115  | (-) | NNNNNNNWATGCAAATNNNWNW | GAAACTAAT             |
| M0013 |            | 0.8858 |      |     |                        | TAAAAAAATTAACATA-     |
| 8     | V\$OCT1_04 | 22     | 217  | (-) | NNNNNNNWATGCAAATNNNWNW | CACATAC               |
| M0013 |            | 0.8557 |      |     |                        |                       |
| 5     | V\$OCT1_01 | 8      | 219  | (-) | NNNNWTATGCAAATNTNNN    | AAAAAATTAACATACACAT   |
| M0016 |            | 0.8812 |      |     |                        |                       |
| 2     | V\$OCT1_06 | 5      | 221  | (+) | CWNAWTKWSATRYN         | AAAATTAACATACA        |
| M0024 |            | 0.9932 |      |     |                        |                       |
| 8     | V\$OCT1_07 | 16     | 223  | (-) | TNTATGNTAATT           | AATTAACATACA          |
| M0016 |            | 0.8734 |      |     |                        |                       |
| 2     | V\$OCT1_06 | 37     | 242  | (+) | CWNAWTKWSATRYN         | GAAATGTTATACT         |
| M0016 |            | 0.8042 |      |     |                        |                       |
| 2     | V\$OCT1_06 | 97     | 258  | (-) | CWNAWTKWSATRYN         | TCTATCTTATGATG        |
| M0016 |            | 0.8015 |      |     |                        |                       |
| 2     | V\$OCT1_06 | 62     | 265  | (+) | CWNAWTKWSATRYN         | TATGATGAAATGCC        |
| M0016 |            | 0.8035 |      |     |                        |                       |
| 2     | V\$OCT1_06 | 16     | 271  | (-) | CWNAWTKWSATRYN         | GAAATGCCACAGTT        |
| M0013 |            | 0.8818 |      |     |                        |                       |
| 7     | V\$OCT1_03 | 65     | 293  | (+) | NNNRTAATNANNN          | GAGCTAATCATAA         |
| M0013 |            | 0.9755 |      |     |                        |                       |
| 7     | V\$OCT1_03 | 04     | 299  | (+) | NNNRTAATNANNN          | ATCATAATGAGGT         |
| M0016 |            | 0.8812 |      |     |                        |                       |
| 2     | V\$OCT1_06 | 5      | 301  | (+) | CWNAWTKWSATRYN         | CATAATGAGGTTTT        |
| M0013 |            | 0.7340 |      |     |                        |                       |
| 5     | V\$OCT1_01 | 71     | 308  | (+) | NNNNWTATGCAAATNTNNN    | AGGTTTTTGAAAATCCAGG   |
| M0013 |            | 0.7850 |      |     |                        |                       |
| 6     | V\$OCT1_02 | 57     | 311  | (-) | NNGAATATKCANNNN        | TTTTTGAAAATCCAG       |

|       |            |        |     |     |                         |                                       |
|-------|------------|--------|-----|-----|-------------------------|---------------------------------------|
| M0016 |            | 0.8628 |     |     |                         |                                       |
| 2     | V\$OCT1_06 | 91     | 332 | (+) | CWNAWKWSATRYN           | GCACATTAGATGTA                        |
| M0016 |            | 0.8214 |     |     |                         |                                       |
| 2     | V\$OCT1_06 | 84     | 333 | (-) | CWNAWKWSATRYN           | CACATTAGATGTAT                        |
| M0013 |            | 0.8664 |     |     |                         |                                       |
| 7     | V\$OCT1_03 | 56     | 371 | (+) | NNNRATAATNANNN          | CTGTAAATCAGAC                         |
| M0013 |            | 0.8609 |     |     |                         |                                       |
| 7     | V\$OCT1_03 | 25     | 465 | (+) | NNNRATAATNANNN          | TTCATAACTACAA                         |
| M0016 |            | 0.8136 |     |     |                         |                                       |
| 2     | V\$OCT1_06 | 72     | 486 | (+) | CWNAWKWSATRYN           | ATGTTTCTCATTTA                        |
| M0016 |            | 0.8601 |     |     |                         |                                       |
| 2     | V\$OCT1_06 | 56     | 487 | (-) | CWNAWKWSATRYN           | TGTTTCTCATTTAT                        |
| M0016 |            | 0.8550 |     |     |                         |                                       |
| 2     | V\$OCT1_06 | 78     | 513 | (-) | CWNAWKWSATRYN           | AACATTTATTTAAC                        |
| M0016 |            | 0.8003 |     |     |                         |                                       |
| 2     | V\$OCT1_06 | 91     | 516 | (+) | CWNAWKWSATRYN           | ATTTATTTAACTCT                        |
| M0013 |            | 0.7839 |     |     |                         |                                       |
| 6     | V\$OCT1_02 | 74     | 532 | (+) | NNGAATATKCANNNN         | GTTAATATTTGTCCA                       |
| M0016 |            | 0.8007 |     |     |                         |                                       |
| 2     | V\$OCT1_06 | 81     | 545 | (-) | CWNAWKWSATRYN           | CATGTTCCAGTTTC                        |
| M0016 |            | 0.8343 |     |     |                         |                                       |
| 2     | V\$OCT1_06 | 75     | 554 | (+) | CWNAWKWSATRYN           | GTTTCTTTTCATCCA                       |
| M0013 |            | 0.8402 |     |     |                         |                                       |
| 8     | V\$OCT1_04 | 34     | 559 | (+) | NNNNNNNWATGCAAATNNWNWNW | TTTCATCCATGGAAAA-TAAAATA              |
| M0024 |            | 0.8200 |     |     |                         |                                       |
| 8     | V\$OCT1_07 | 13     | 564 | (+) | TNTATGNTAATT            | TCCATGGAAAAAT                         |
| M0016 |            | 0.8554 |     |     |                         |                                       |
| 2     | V\$OCT1_06 | 69     | 570 | (+) | CWNAWKWSATRYN           | GAAAAATAAAATATC                       |
| M0016 |            | 0.8136 |     |     |                         |                                       |
| 2     | V\$OCT1_06 | 72     | 570 | (-) | CWNAWKWSATRYN           | GAAAAATAAAATATC                       |
| M0016 |            | 0.8214 |     |     |                         |                                       |
| 2     | V\$OCT1_06 | 84     | 571 | (-) | CWNAWKWSATRYN           | AAAATAAAATATCT                        |
| M0024 |            | 0.7986 |     |     |                         |                                       |
| 8     | V\$OCT1_07 | 01     | 572 | (-) | TNTATGNTAATT            | AAATAAAATATC                          |
| M0013 |            | 0.8005 |     |     |                         |                                       |
| 8     | V\$OCT1_04 | 02     | 601 | (+) | NNNNNNNWATGCAAATNNWNWNW | AAGTGCGTATA-CATAATGAACCT              |
| M0013 |            | 0.8945 |     |     |                         |                                       |
| 7     | V\$OCT1_03 | 08     | 610 | (+) | NNNRATAATNANNN          | TACATAATGAACCT                        |
| M0013 |            | 0.7936 |     |     |                         |                                       |
| 8     | V\$OCT1_04 | 01     | 616 | (+) | NNNNNNNWATGCAAATNNWNWNW | ATGAACCTTATTTCAAATTTTTAA              |
| M0016 |            | 0.8214 |     |     |                         |                                       |
| 2     | V\$OCT1_06 | 84     | 621 | (-) | CWNAWKWSATRYN           | CTTATTTCAAATTT                        |
| M0016 |            | 0.8601 |     |     |                         |                                       |
| 2     | V\$OCT1_06 | 56     | 623 | (-) | CWNAWKWSATRYN           | TATTTCAAATTTTT                        |
| M0013 |            | 0.7860 |     |     |                         |                                       |
| 8     | V\$OCT1_04 | 73     | 626 | (-) | NNNNNNNWATGCAAATNNWNWNW | TTCAAATTTTTAACTTATAAAAT               |
| M0016 |            | 0.8003 |     |     |                         |                                       |
| 2     | V\$OCT1_06 | 91     | 629 | (+) | CWNAWKWSATRYN           | AAATTTTTAACTTA                        |
| M0013 |            | 0.7823 |     |     |                         |                                       |
| 8     | V\$OCT1_04 | 09     | 639 | (-) | NNNNNNNWATGCAAATNNWNWNW | CTTATAAAATTTAATATATATATATATATA        |
| M0013 |            | 0.8076 |     |     |                         |                                       |
| 8     | V\$OCT1_04 | 12     | 641 | (-) | NNNNNNNWATGCAAATNNWNWNW | TATATA-<br>TAAAATTTAATATATATATCA<br>A |
| M0013 |            | 0.7384 |     |     |                         |                                       |
| 5     | V\$OCT1_01 | 59     | 643 | (-) | NNNNWTATGCAAAATNTNNN    | TAAAATTTAATATATATAT                   |
| M0016 |            | 0.8812 |     |     |                         |                                       |
| 2     | V\$OCT1_06 | 5      | 643 | (+) | CWNAWKWSATRYN           | TAAAATTTAATATA                        |
| M0013 |            | 0.7990 |     |     |                         |                                       |
| 8     | V\$OCT1_04 | 38     | 644 | (+) | NNNNNNNWATGCAAATNNWNWNW | AAAATTTAATATATATATCATCT               |
| M0016 |            | 0.8984 |     |     |                         |                                       |
| 2     | V\$OCT1_06 | 37     | 644 | (-) | CWNAWKWSATRYN           | AAAATTTAATATAT                        |
| M0013 |            | 0.8071 |     |     |                         |                                       |
| 8     | V\$OCT1_04 | 94     | 645 | (-) | NNNNNNNWATGCAAATNNWNWNW | AAATTTAATATATATATCATCTT               |
| M0013 |            | 0.7944 |     |     |                         |                                       |
| 8     | V\$OCT1_04 | 37     | 646 | (+) | NNNNNNNWATGCAAATNNWNWNW | AATTTAATATATATATCATCTTA               |

|       |            |        |     |                |                        |                       |
|-------|------------|--------|-----|----------------|------------------------|-----------------------|
| M0013 |            | 0.8088 |     |                |                        | ATTTAATATATATATCATCTT |
| 8     | V\$OCT1_04 | 67     | 647 | (-)            | NNNNNNNWATGCAAATNNNWNW | AT                    |
| M0024 |            | 0.7935 |     |                |                        |                       |
| 8     | V\$OCT1_07 | 13     | 647 | (-)            | TNTATGNTAATT           | ATTTAATATATA          |
| M0016 |            | 0.8578 |     |                |                        |                       |
| 2     | V\$OCT1_06 | 12     | 665 | (+)            | CWNAWTKWSATRYN         | CTTATTTTAAAAACA       |
| M0013 |            | 0.7927 |     |                |                        | TAAAAACATT-           |
| 8     | V\$OCT1_04 | 65     | 671 | (-)            | NNNNNNNWATGCAAATNNNWNW | GTCATTATGAAAT         |
| M0016 |            | 0.8476 |     |                |                        |                       |
| 2     | V\$OCT1_06 | 56     | 675 | (+)            | CWNAWTKWSATRYN         | AACATTGTCATTAT        |
| M0016 |            | 0.8121 |     |                |                        |                       |
| 2     | V\$OCT1_06 | 09     | 676 | (-)            | CWNAWTKWSATRYN         | ACATTGTCATTATG        |
| M0013 |            | 0.9573 |     |                |                        |                       |
| 7     | V\$OCT1_03 | 29     | 679 | (-)            | NNNRATAATNANN          | TTGTCATTATGAA         |
| M0016 |            | 0.9531 |     |                |                        |                       |
| 2     | V\$OCT1_06 | 25     | 683 | (+)            | CWNAWTKWSATRYN         | CATTATGAAATGCT        |
| M0013 |            | 0.8354 |     |                |                        | AT-                   |
| 8     | V\$OCT1_04 | 25     | 684 | (+)            | NNNNNNNWATGCAAATNNNWNW | TATGAAATGCTTATAAAGTG  |
| M0016 |            | 0.8421 |     |                |                        | A                     |
| 2     | V\$OCT1_06 | 87     | 684 | (-)            | CWNAWTKWSATRYN         | ATTATGAAATGCTT        |
| M0013 |            | 0.8439 |     |                |                        |                       |
| 7     | V\$OCT1_03 | 35     | 695 | (+)            | NNNRATAATNANN          | CTTATAAAGTGAA         |
| M0016 |            | 0.8214 |     |                |                        |                       |
| 2     | V\$OCT1_06 | 84     | 698 | (+)            | CWNAWTKWSATRYN         | ATAAAGTGAATGTC        |
| M0016 |            | 0.9324 |     |                |                        |                       |
| 2     | V\$OCT1_06 | 22     | 703 | (+)            | CWNAWTKWSATRYN         | GTGAATGTCATGTG        |
| M0016 |            | 0.85   |     |                |                        |                       |
| 2     | V\$OCT1_06 | 704    | (-) | CWNAWTKWSATRYN | TGAATGTCATGTGC         |                       |
| M0013 |            | 0.7661 |     |                |                        |                       |
| 5     | V\$OCT1_01 | 2      | 707 | (-)            | NNNNWTATGCAAATNTNN     | ATGTCATGTGCATTATCCT   |
| M0016 |            | 0.8509 |     |                |                        |                       |
| 1     | V\$OCT1_05 | 05     | 709 | (+)            | MKNATTTGCATAYY         | GTCATGTGCATTAT        |
| M0019 |            | 0.8048 |     |                |                        |                       |
| 5     | V\$OCT1_Q6 | 58     | 709 | (-)            | NNNNATGCAAATNAN        | GTCATGTGCATTATC       |
| M0013 |            | 0.8232 |     |                |                        |                       |
| 6     | V\$OCT1_02 | 27     | 711 | (-)            | NNGAATATKCANNN         | CATGTGCATTATCCT       |
| M0013 |            | 0.7704 |     |                |                        |                       |
| 6     | V\$OCT1_02 | 39     | 735 | (-)            | NNGAATATKCANNN         | AACAAGAATATCTGG       |
| M0016 |            | 0.8699 |     |                |                        |                       |
| 2     | V\$OCT1_06 | 22     | 742 | (+)            | CWNAWTKWSATRYN         | ATATCTGGGATTCT        |
| M0013 |            | 0.8354 |     |                |                        | TAGTAGAAATGA-         |
| 8     | V\$OCT1_04 | 25     | 757 | (+)            | NNNNNNNWATGCAAATNNNWNW | TAAATTAATAA           |
| M0016 |            | 0.8316 |     |                |                        |                       |
| 2     | V\$OCT1_06 | 41     | 775 | (-)            | CWNAWTKWSATRYN         | AATAACAAAAGCAG        |
| M0013 |            | 0.8025 |     |                |                        | AG-                   |
| 8     | V\$OCT1_04 | 93     | 784 | (+)            | NNNNNNNWATGCAAATNNNWNW | CAGGCAATGCTAATCTTAA-  |
| M0013 |            | 0.7729 |     |                |                        | GA                    |
| 5     | V\$OCT1_01 | 87     | 786 | (+)            | NNNNWTATGCAAATNTNN     | CAGGCAATGCTAATCTTAA   |
| M0019 |            | 0.8179 |     |                |                        |                       |
| 5     | V\$OCT1_Q6 | 59     | 788 | (+)            | NNNNATGCAAATNAN        | GGCAATGCTAATCTT       |
| M0024 |            | 0.8149 |     |                |                        |                       |
| 8     | V\$OCT1_07 | 25     | 789 | (+)            | TNTATGNTAATT           | GCAATGCTAATC          |
| M0013 |            | 0.7761 |     |                |                        |                       |
| 6     | V\$OCT1_02 | 23     | 804 | (-)            | NNGAATATKCANNN         | AGAGAGAATAATTCC       |
| M0013 |            | 0.7858 |     |                |                        | ATAATTCCCATGCATA-     |
| 8     | V\$OCT1_04 | 64     | 811 | (-)            | NNNNNNNWATGCAAATNNNWNW | CACATTC               |
| M0016 |            | 0.8042 |     |                |                        |                       |
| 2     | V\$OCT1_06 | 97     | 811 | (+)            | CWNAWTKWSATRYN         | ATAATTCCCATGCA        |
| M0019 |            | 0.8204 |     |                |                        |                       |
| 5     | V\$OCT1_Q6 | 15     | 811 | (-)            | NNNNATGCAAATNAN        | ATAATTCCCATGCAT       |
| M0013 |            | 0.7942 |     |                |                        | TAATTCCCATGCATA-      |
| 8     | V\$OCT1_04 | 28     | 812 | (+)            | NNNNNNNWATGCAAATNNNWNW | CACATTCT              |
| M0024 |            | 0.8496 |     |                |                        |                       |
| 8     | V\$OCT1_07 | 93     | 813 | (-)            | TNTATGNTAATT           | AATTCCCATGCA          |

|       |            |        |      |     |                         |                     |
|-------|------------|--------|------|-----|-------------------------|---------------------|
| M0013 |            | 0.8121 |      |     |                         |                     |
| 6     | V\$OCT1_02 | 28     | 817  | (-) | NNGAATATKCANNNN         | CCCATGCATACACAT     |
| M0016 |            | 0.8093 |      |     |                         |                     |
| 2     | V\$OCT1_06 | 75     | 830  | (-) | CWNAWTKWSATRYN          | ATTCTCTAAATTTG      |
| M0013 |            | 0.8448 |      |     |                         | TCTCTAAATTT-        |
| 8     | V\$OCT1_04 | 35     | 832  | (-) | NNNNNNNWATGCAAATNNNWNNW | GCACAGGCAAAAG       |
| M0013 |            | 0.8239 |      |     |                         |                     |
| 5     | V\$OCT1_01 | 22     | 834  | (-) | NNNNWTATGCAAATNTNNN     | TCTAAATTTGCACAGGCAA |
| M0024 |            | 0.8333 |      |     |                         |                     |
| 8     | V\$OCT1_07 | 69     | 838  | (-) | TNTATGNTAATT            | AATTTGCACAGG        |
| M0013 |            | 0.8034 |      |     |                         | ATTTGCACAGGCAAA-    |
| 8     | V\$OCT1_04 | 3      | 839  | (+) | NNNNNNNWATGCAAATNNNWNNW | GATCACCA            |
| M0013 |            | 0.7426 |      |     |                         |                     |
| 5     | V\$OCT1_01 | 55     | 841  | (+) | NNNNWTATGCAAATNTNNN     | TTGCACAGGCAAAGATCAC |
| M0016 |            | 0.8160 |      |     |                         |                     |
| 2     | V\$OCT1_06 | 16     | 844  | (-) | CWNAWTKWSATRYN          | CACAGGCAAAGATC      |
| M0016 |            | 0.8164 |      |     |                         |                     |
| 2     | V\$OCT1_06 | 06     | 863  | (-) | CWNAWTKWSATRYN          | CAAATTTAACAATT      |
| M0013 |            | 0.8090 |      |     |                         | CAATTTTGAGTCAAA-    |
| 8     | V\$OCT1_04 | 76     | 872  | (+) | NNNNNNNWATGCAAATNNNWNNW | TAAATCT             |
| M0016 |            | 0.8421 |      |     |                         |                     |
| 2     | V\$OCT1_06 | 87     | 890  | (+) | CWNAWTKWSATRYN          | AATCTTGCCATTTA      |
| M0016 |            | 0.8082 |      |     |                         |                     |
| 2     | V\$OCT1_06 | 03     | 905  | (+) | CWNAWTKWSATRYN          | AAATAATTGATTTC      |
| M0016 |            | 0.8214 |      |     |                         |                     |
| 2     | V\$OCT1_06 | 84     | 906  | (+) | CWNAWTKWSATRYN          | AATAATTGATTTCA      |
| M0013 |            | 0.8149 |      |     |                         | ATAATTGATTTCAAATTT- |
| 8     | V\$OCT1_04 | 31     | 907  | (+) | NNNNNNNWATGCAAATNNNWNNW | GTAGA               |
| M0016 |            | 0.8398 |      |     |                         |                     |
| 2     | V\$OCT1_06 | 44     | 912  | (-) | CWNAWTKWSATRYN          | TGATTTCAAATTTG      |
| M0013 |            | 0.7835 |      |     |                         | ATTTCAAATTT-        |
| 8     | V\$OCT1_04 | 63     | 914  | (-) | NNNNNNNWATGCAAATNNNWNNW | GTAGATCTACAG        |
| M0013 |            | 0.7848 |      |     |                         | TTTCAAATTT-         |
| 8     | V\$OCT1_04 | 18     | 915  | (+) | NNNNNNNWATGCAAATNNNWNNW | GTAGATCTACAGA       |
| M0013 |            | 0.7758 |      |     |                         |                     |
| 5     | V\$OCT1_01 | 49     | 916  | (-) | NNNNWTATGCAAATNTNNN     | TTCAAATTTGTAGATCTAC |
| M0016 |            | 0.8214 |      |     |                         |                     |
| 2     | V\$OCT1_06 | 84     | 1021 | (+) | CWNAWTKWSATRYN          | ATCCATGGGATCTT      |
| M0013 |            | 0.7401 |      |     |                         |                     |
| 5     | V\$OCT1_01 | 76     | 1058 | (-) | NNNNWTATGCAAATNTNNN     | TTGCCATTTCCACACTATT |
| M0013 |            | 0.8613 |      |     |                         |                     |
| 7     | V\$OCT1_03 | 2      | 1069 | (-) | NNNRTAATNANNN           | ACACTATTATATG       |
| M0016 |            | 0.8710 |      |     |                         |                     |
| 2     | V\$OCT1_06 | 94     | 1070 | (+) | CWNAWTKWSATRYN          | CACTATTATATGTC      |
| M0016 |            | 0.9503 |      |     |                         |                     |
| 2     | V\$OCT1_06 | 91     | 1076 | (-) | CWNAWTKWSATRYN          | TATATGTCAAAAAG      |
| M0016 |            | 0.8699 |      |     |                         |                     |
| 2     | V\$OCT1_06 | 22     | 1167 | (+) | CWNAWTKWSATRYN          | GTTCCTGGGATTCT      |
| M0016 |            | 0.8683 |      |     |                         |                     |
| 2     | V\$OCT1_06 | 59     | 1223 | (-) | CWNAWTKWSATRYN          | TGCATGAAAGTGAA      |
| M0013 |            | 0.8017 |      |     |                         | GCATGAAAGTGAAAAAAG  |
| 8     | V\$OCT1_04 | 57     | 1224 | (+) | NNNNNNNWATGCAAATNNNWNNW | TTAA                |
| M0016 |            | 0.8394 |      |     |                         |                     |
| 2     | V\$OCT1_06 | 53     | 1229 | (-) | CWNAWTKWSATRYN          | AAAGTGAAAAAAG       |
| M0016 |            | 0.8777 |      |     |                         |                     |
| 2     | V\$OCT1_06 | 34     | 1307 | (+) | CWNAWTKWSATRYN          | ATCCATGGGATTTT      |
| M0013 |            | 0.8212 |      |     |                         | AAAAAAGCATTAAAA-    |
| 8     | V\$OCT1_04 | 05     | 1363 | (+) | NNNNNNNWATGCAAATNNNWNNW | TAACTTTA            |
| M0013 |            | 0.8063 |      |     |                         | AAAAAAGCATTAAAA-    |
| 8     | V\$OCT1_04 | 57     | 1364 | (-) | NNNNNNNWATGCAAATNNNWNNW | TAACTTTAT           |
| M0019 |            | 0.8193 |      |     |                         |                     |
| 5     | V\$OCT1_Q6 | 23     | 1367 | (+) | NNNNATGCAAATNAN         | AAGCATTAAAAATAAC    |
| M0016 |            | 0.9296 |      |     |                         |                     |
| 2     | V\$OCT1_06 | 88     | 1368 | (-) | CWNAWTKWSATRYN          | AGCATTAATAAAC       |
| M0024 |            | 0.7986 |      |     |                         |                     |
| 8     | V\$OCT1_07 | 01     | 1370 | (-) | TNTATGNTAATT            | CATTAATAAAC         |

|       |            |        |      |     |                           |                     |
|-------|------------|--------|------|-----|---------------------------|---------------------|
| M0016 |            | 0.8058 |      |     |                           |                     |
| 2     | V\$OCT1_06 | 59     | 1377 | (+) | CWNAWTKWSATRYN            | ATAACTTTATTTC       |
| M0016 |            | 0.8472 |      |     |                           |                     |
| 2     | V\$OCT1_06 | 66     | 1381 | (+) | CWNAWTKWSATRYN            | CTTTATTTCACTTT      |
| M0013 |            | 0.7850 |      |     |                           | TATTTCACTTTTCAG-    |
| 8     | V\$OCT1_04 | 27     | 1384 | (-) | NNNNNNNNWATGCAAATNNNWNWNW | TTATTTGT            |
| M0016 |            | 0.8214 |      |     |                           |                     |
| 2     | V\$OCT1_06 | 84     | 1389 | (-) | CWNAWTKWSATRYN            | CACTTTTCAGTTAT      |
| M0013 |            | 0.7403 |      |     |                           |                     |
| 5     | V\$OCT1_01 | 66     | 1396 | (-) | NNNNWTATGCAAATNTNNN       | CAGTTATTTGTTTATGCAC |
| M0019 |            | 0.8116 |      |     |                           |                     |
| 5     | V\$OCT1_Q6 | 81     | 1398 | (-) | NNNNATGCAAATNAN           | GTTATTTGTTTATGC     |
| M0013 |            | 0.8783 |      |     |                           |                     |
| 7     | V\$OCT1_03 | 09     | 1401 | (-) | NNNRATATNANNN             | ATTTGTTTATGCA       |
| M0013 |            | 0.7891 |      |     |                           |                     |
| 6     | V\$OCT1_02 | 17     | 1403 | (+) | NNGAATATKCANNNN           | TTGTTTATGCACTGG     |
| M0013 |            | 0.7842 |      |     |                           |                     |
| 6     | V\$OCT1_02 | 45     | 1427 | (+) | NNGAATATKCANNNN           | ATCGATATGTAGTCA     |
| M0016 |            | 0.8296 |      |     |                           |                     |
| 2     | V\$OCT1_06 | 87     | 1452 | (+) | CWNAWTKWSATRYN            | GGGACTTATATGTG      |
| M0016 |            | 0.8398 |      |     |                           |                     |
| 2     | V\$OCT1_06 | 44     | 1471 | (-) | CWNAWTKWSATRYN            | AGTATTAGAGATTG      |
| M0016 |            | 0.8042 |      |     |                           |                     |
| 2     | V\$OCT1_06 | 97     | 1509 | (-) | CWNAWTKWSATRYN            | AAAATCTCGTTTGG      |
| M0013 |            | 0.7834 |      |     |                           |                     |
| 6     | V\$OCT1_02 | 33     | 1522 | (+) | NNGAATATKCANNNN           | GTGGTTATTCTGTCA     |
| M0016 |            | 0.8003 |      |     |                           |                     |
| 2     | V\$OCT1_06 | 91     | 1537 | (+) | CWNAWTKWSATRYN            | GGTTCAGTGATGTT      |
| M0016 |            | 0.8046 |      |     |                           |                     |
| 2     | V\$OCT1_06 | 87     | 1599 | (+) | CWNAWTKWSATRYN            | CAGAGTGTTATTTT      |
| M0019 |            | 0.8004 |      |     |                           |                     |
| 5     | V\$OCT1_Q6 | 91     | 1605 | (-) | NNNNATGCAAATNAN           | GTTATTTTCACCTGC     |
| M0016 |            | 0.8214 |      |     |                           |                     |
| 2     | V\$OCT1_06 | 84     | 1613 | (-) | CWNAWTKWSATRYN            | CACCTGCCAATTCT      |
| M0016 |            | 0.8062 |      |     |                           |                     |
| 2     | V\$OCT1_06 | 5      | 1660 | (+) | CWNAWTKWSATRYN            | CTCACTTGATTTTA      |
| M0013 |            | 0.8465 |      |     |                           | TGTTGTTTTTTT-       |
| 8     | V\$OCT1_04 | 08     | 1684 | (-) | NNNNNNNNWATGCAAATNNNWNWNW | GCATTTCTGATG        |
| M0013 |            | 0.7954 |      |     |                           |                     |
| 5     | V\$OCT1_01 | 98     | 1686 | (-) | NNNNWTATGCAAATNTNNN       | TTGTTTTTGCATTTCTGA  |
| M0016 |            | 0.8777 |      |     |                           |                     |
| 2     | V\$OCT1_06 | 34     | 1688 | (+) | CWNAWTKWSATRYN            | GTTTTTGCATTTT       |
| M0019 |            | 0.8943 |      |     |                           |                     |
| 5     | V\$OCT1_Q6 | 78     | 1688 | (-) | NNNNATGCAAATNAN           | GTTTTTGCATTTCT      |
| M0013 |            | 0.7925 |      |     |                           | TAAGAAGAATT-        |
| 8     | V\$OCT1_04 | 55     | 1722 | (+) | NNNNNNNNWATGCAAATNNNWNWNW | GTAAAAAAAAT         |
| M0013 |            | 0.7906 |      |     |                           | AAGAAGAATT-         |
| 8     | V\$OCT1_04 | 73     | 1723 | (+) | NNNNNNNNWATGCAAATNNNWNWNW | GTAAAAAAAATA        |
| M0016 |            | 0.8292 |      |     |                           |                     |
| 2     | V\$OCT1_06 | 97     | 1741 | (+) | CWNAWTKWSATRYN            | AAATATGGCATTAT      |
| M0016 |            | 0.8890 |      |     |                           |                     |
| 2     | V\$OCT1_06 | 62     | 1742 | (-) | CWNAWTKWSATRYN            | AATATGGCATTATT      |
| M0013 |            | 0.8407 |      |     |                           |                     |
| 7     | V\$OCT1_03 | 74     | 1745 | (-) | NNNRATATNANNN             | ATGGCATTATTAG       |
| M0013 |            | 0.8356 |      |     |                           | TGGCATTATTAG-       |
| 8     | V\$OCT1_04 | 34     | 1746 | (-) | NNNNNNNNWATGCAAATNNNWNWNW | TATAAACATCA         |
| M0013 |            | 0.7922 |      |     |                           |                     |
| 5     | V\$OCT1_01 | 55     | 1748 | (-) | NNNNWTATGCAAATNTNNN       | GCATTATTAGTATAAACAT |
| M0013 |            | 0.8403 |      |     |                           |                     |
| 7     | V\$OCT1_03 | 79     | 1748 | (-) | NNNRATATNANNN             | GCATTATTAGTAT       |
| M0019 |            | 0.8081 |      |     |                           |                     |
| 5     | V\$OCT1_Q6 | 33     | 1750 | (-) | NNNNATGCAAATNAN           | ATTATTAGTATAAAC     |
| M0013 |            | 0.8314 |      |     |                           | TATTAGTATAAACATCAC- |
| 8     | V\$OCT1_04 | 51     | 1752 | (-) | NNNNNNNNWATGCAAATNNNWNWNW | TATTT               |
| M0024 |            | 0.8002 |      |     |                           |                     |
| 8     | V\$OCT1_07 | 97     | 1752 | (-) | TNTATGNTAATT              | TATTAGTATAAA        |



|       |            |        |      |     |                         |                       |
|-------|------------|--------|------|-----|-------------------------|-----------------------|
| M0016 |            | 0.8601 |      |     |                         |                       |
| 2     | V\$OCT1_06 | 56     | 1762 | (-) | CWNAWTKWSATRYN          | AACATCACTATTTT        |
| M0013 |            | 0.8055 |      |     |                         | ATCACTATTTTTCATCACTG- |
| 8     | V\$OCT1_04 | 21     | 1765 | (-) | NNNNNNNWATGCAAATNNNWNNW | TAT                   |
| M0016 |            | 0.8214 |      |     |                         |                       |
| 2     | V\$OCT1_06 | 84     | 1804 | (+) | CWNAWTKWSATRYN          | GTACCTGACATAGC        |
| M0013 |            | 0.8345 |      |     |                         | GAATAAGTGGGTAAATTAA-  |
| 8     | V\$OCT1_04 | 88     | 1829 | (+) | NNNNNNNWATGCAAATNNNWNNW | TAAA                  |
| M0013 |            | 0.8025 |      |     |                         | GTGGGTAAATTAATAAAA-   |
| 8     | V\$OCT1_04 | 93     | 1835 | (+) | NNNNNNNWATGCAAATNNNWNNW | TAAATT                |
| M0024 |            | 0.7935 |      |     |                         |                       |
| 8     | V\$OCT1_07 | 13     | 1842 | (-) | TNTATGNTAATT            | AATTAATAAATA          |
| M0013 |            | 0.8478 |      |     |                         |                       |
| 7     | V\$OCT1_03 | 86     | 1844 | (+) | NNNRTAATNANNN           | TTAATAAATAAAT         |
| M0016 |            | 0.8093 |      |     |                         |                       |
| 2     | V\$OCT1_06 | 75     | 1846 | (-) | CWNAWTKWSATRYN          | AATAAATAAATTAG        |
| M0013 |            | 0.7802 |      |     |                         | AAATAAATT-            |
| 8     | V\$OCT1_04 | 17     | 1849 | (-) | NNNNNNNWATGCAAATNNNWNNW | AGCCATTATACAT         |
| M0016 |            | 0.8343 |      |     |                         |                       |
| 2     | V\$OCT1_06 | 75     | 1895 | (-) | CWNAWTKWSATRYN          | GGTATGCCCAAATG        |
| M0016 |            | 0.8082 |      |     |                         |                       |
| 2     | V\$OCT1_06 | 03     | 1923 | (-) | CWNAWTKWSATRYN          | AGAACTAAGATTT         |
| M0016 |            | 0.8347 |      |     |                         |                       |
| 2     | V\$OCT1_06 | 66     | 1924 | (+) | CWNAWTKWSATRYN          | GAACTAAGATTTT         |
| M0016 |            | 0.8085 |      |     |                         |                       |
| 2     | V\$OCT1_06 | 94     | 1931 | (+) | CWNAWTKWSATRYN          | AGATTTACATTTT         |
| M0016 |            | 0.8265 |      |     |                         |                       |
| 2     | V\$OCT1_06 | 62     | 1932 | (-) | CWNAWTKWSATRYN          | GATTTACATTTCC         |
| M0016 |            | 0.8371 |      |     |                         |                       |
| 2     | V\$OCT1_06 | 09     | 1937 | (-) | CWNAWTKWSATRYN          | CACATTTCTTCTC         |
| M0013 |            | 0.7864 |      |     |                         | CTCCAGAT-             |
| 8     | V\$OCT1_04 | 91     | 1948 | (-) | NNNNNNNWATGCAAATNNNWNNW | TTTACATTATGTTGT       |
| M0013 |            | 0.7657 |      |     |                         |                       |
| 5     | V\$OCT1_01 | 38     | 1950 | (-) | NNNNWTATGCAAATNTNNN     | CCAGATTTTACATTATGTT   |
| M0016 |            | 0.8214 |      |     |                         |                       |
| 2     | V\$OCT1_06 | 84     | 1952 | (+) | CWNAWTKWSATRYN          | AGATTTTACATTAT        |
| M0016 |            | 0.8605 |      |     |                         |                       |
| 2     | V\$OCT1_06 | 47     | 1953 | (-) | CWNAWTKWSATRYN          | GATTTTACATTATG        |
| M0024 |            | 0.7930 |      |     |                         |                       |
| 8     | V\$OCT1_07 | 89     | 1954 | (-) | TNTATGNTAATT            | ATTTTACATTAT          |
| M0013 |            | 0.8553 |      |     |                         |                       |
| 7     | V\$OCT1_03 | 93     | 1956 | (-) | NNNRTAATNANNN           | TTTACATTATGTT         |
| M0013 |            | 0.7979 |      |     |                         | ATTATGTT-             |
| 8     | V\$OCT1_04 | 92     | 1961 | (+) | NNNNNNNWATGCAAATNNNWNNW | GTGTTAATTTATTCT       |
| M0013 |            | 0.7394 |      |     |                         |                       |
| 5     | V\$OCT1_01 | 12     | 1963 | (+) | NNNNWTATGCAAATNTNNN     | TATGTTGTGTTAATTTATT   |
| M0024 |            | 0.8573 |      |     |                         |                       |
| 8     | V\$OCT1_07 | 25     | 1966 | (+) | TNTATGNTAATT            | GTTGTGTTAATT          |
| M0019 |            | 0.7985 |      |     |                         |                       |
| 5     | V\$OCT1_Q6 | 81     | 1979 | (+) | NNNNATGCAAATNAN         | ATTCTTGTAAGAAC        |
| M0013 |            | 0.8478 |      |     |                         |                       |
| 7     | V\$OCT1_03 | 86     | 1982 | (+) | NNNRTAATNANNN           | CTTGTAAGAAGACT        |
| M0013 |            | 0.8502 |      |     |                         |                       |
| 7     | V\$OCT1_03 | 57     | 1991 | (-) | NNNRTAATNANNN           | AACTATTGTATT          |
| M0013 |            | 0.7764 |      |     |                         |                       |
| 5     | V\$OCT1_01 | 21     | 1995 | (+) | NNNNWTATGCAAATNTNNN     | CATTGTATTCAAATCCATG   |
| M0019 |            | 0.7953 |      |     |                         |                       |
| 5     | V\$OCT1_Q6 | 06     | 1997 | (+) | NNNNATGCAAATNAN         | TTGTATTCAAATCCA       |
| M0016 |            | 0.8269 |      |     |                         |                       |
| 2     | V\$OCT1_06 | 53     | 1998 | (-) | CWNAWTKWSATRYN          | TGTATTCAAATCCA        |
| M0024 |            | 0.8193 |      |     |                         |                       |
| 8     | V\$OCT1_07 | 77     | 1998 | (+) | TNTATGNTAATT            | TGTATTCAAATC          |
| M0013 |            | 0.7750 |      |     |                         |                       |
| 6     | V\$OCT1_02 | 41     | 2020 | (-) | NNGAATATKCANNNN         | TCAATGAATCTACTT       |
| M0013 |            |        |      |     |                         |                       |
| 7     | V\$OCT1_03 | 0.8629 | 2042 | (-) | NNNRTAATNANNN           | TCTTCATTGCCCT         |

|       |            |        |      |     |                        |                       |
|-------|------------|--------|------|-----|------------------------|-----------------------|
| M0024 |            | 0.7986 |      |     |                        |                       |
| 8     | V\$OCT1_07 | 01     | 2052 | (+) | TNTATGNTAATT           | CCTTTTCTAATT          |
| M0013 |            | 0.7810 |      |     |                        | TTTTCTAATTATCATCTGAA- |
| 8     | V\$OCT1_04 | 54     | 2054 | (-) | NNNNNNNWATGCAAATNNNWNW | GAT                   |
| M0013 |            | 0.8474 |      |     |                        |                       |
| 7     | V\$OCT1_03 | 91     | 2055 | (+) | NNNRATAATNANN          | TTTCTAATTATCA         |
| M0013 |            | 0.9253 |      |     |                        |                       |
| 7     | V\$OCT1_03 | 26     | 2056 | (-) | NNNRATAATNANN          | TTCTAATTATCAT         |
| M0016 |            | 0.8656 |      |     |                        |                       |
| 1     | V\$OCT1_05 | 82     | 2058 | (+) | MKNATTTGCATAYY         | CTAATTATCATCTG        |
| M0016 |            | 0.8097 |      |     |                        |                       |
| 2     | V\$OCT1_06 | 66     | 2058 | (+) | CWNAWTKWSATRYN         | CTAATTATCATCTG        |
| M0016 |            |        |      |     |                        |                       |
| 2     | V\$OCT1_06 | 0.9375 | 2074 | (+) | CWNAWTKWSATRYN         | GATAATTTAATACA        |
| M0013 |            | 0.8366 |      |     |                        | ATAATTTAATACATAATTAA  |
| 8     | V\$OCT1_04 | 79     | 2075 | (+) | NNNNNNNWATGCAAATNNNWNW | TAA                   |
| M0016 |            | 0.8085 |      |     |                        |                       |
| 2     | V\$OCT1_06 | 94     | 2075 | (-) | CWNAWTKWSATRYN         | ATAATTTAATACAT        |
| M0013 |            | 0.8909 |      |     |                        |                       |
| 7     | V\$OCT1_03 | 52     | 2084 | (+) | NNNRATAATNANN          | TACATAATTAATA         |
| M0013 |            | 0.8739 |      |     |                        |                       |
| 7     | V\$OCT1_03 | 63     | 2085 | (-) | NNNRATAATNANN          | ACATAATTAATAA         |
| M0013 |            | 0.8522 |      |     |                        |                       |
| 7     | V\$OCT1_03 | 32     | 2088 | (+) | NNNRATAATNANN          | TAATTAATAAGGA         |
| M0013 |            | 0.8038 |      |     |                        |                       |
| 5     | V\$OCT1_01 | 92     | 2090 | (+) | NNNNWTATGCAAATNTNN     | ATTAATAAGGAAATATGTG   |
| M0016 |            | 0.8421 |      |     |                        |                       |
| 2     | V\$OCT1_06 | 87     | 2093 | (+) | CWNAWTKWSATRYN         | AATAAGGAAATATG        |
| M0016 |            | 0.8171 |      |     |                        |                       |
| 2     | V\$OCT1_06 | 87     | 2093 | (-) | CWNAWTKWSATRYN         | AATAAGGAAATATG        |
| M0013 |            | 0.7720 |      |     |                        |                       |
| 6     | V\$OCT1_02 | 63     | 2098 | (+) | NNGAATATKCANN          | GGAAATATGTGATTA       |
| M0016 |            | 0.8343 |      |     |                        |                       |
| 2     | V\$OCT1_06 | 75     | 2100 | (+) | CWNAWTKWSATRYN         | AAATATGTGATTAT        |
| M0016 |            | 0.8328 |      |     |                        |                       |
| 2     | V\$OCT1_06 | 12     | 2101 | (-) | CWNAWTKWSATRYN         | AATATGTGATTATA        |
| M0013 |            | 0.9328 |      |     |                        |                       |
| 7     | V\$OCT1_03 | 33     | 2104 | (-) | NNNRATAATNANN          | ATGTGATTATAAG         |
| M0016 |            | 0.8472 |      |     |                        |                       |
| 2     | V\$OCT1_06 | 66     | 2132 | (+) | CWNAWTKWSATRYN         | ATTAATTAGCTTCT        |
| M0016 |            | 0.8132 |      |     |                        |                       |
| 2     | V\$OCT1_06 | 81     | 2150 | (-) | CWNAWTKWSATRYN         | TATTTACAGGATC         |
| M0013 |            | 0.8668 |      |     |                        |                       |
| 7     | V\$OCT1_03 | 51     | 2163 | (+) | NNNRATAATNANN          | CAAGTAAACATGA         |
| M0016 |            | 0.8160 |      |     |                        |                       |
| 2     | V\$OCT1_06 | 16     | 2168 | (+) | CWNAWTKWSATRYN         | AAACATGAAGTTCT        |
| M0016 |            | 0.8628 |      |     |                        |                       |
| 2     | V\$OCT1_06 | 91     | 2169 | (-) | CWNAWTKWSATRYN         | AACATGAAGTTCTT        |
| M0016 |            | 0.8082 |      |     |                        |                       |
| 2     | V\$OCT1_06 | 03     | 2175 | (+) | CWNAWTKWSATRYN         | AAGTTCTTCATTTT        |
| M0013 |            | 0.7837 |      |     |                        | TCTTCATTTTAC-         |
| 8     | V\$OCT1_04 | 72     | 2179 | (-) | NNNNNNNWATGCAAATNNNWNW | CTGCCTTTGTG           |
| M0013 |            | 0.8648 |      |     |                        |                       |
| 7     | V\$OCT1_03 | 76     | 2182 | (-) | NNNRATAATNANN          | TCATTTTTACCTG         |
| M0016 |            | 0.8628 |      |     |                        |                       |
| 2     | V\$OCT1_06 | 91     | 2183 | (+) | CWNAWTKWSATRYN         | CATTTTTACCTGCC        |
| M0019 |            | 0.8294 |      |     |                        |                       |
| 5     | V\$OCT1_Q6 | 21     | 2208 | (+) | NNNNATGCAAATNAN        | GCCCTTGCAAAGCAT       |
| M0013 |            | 0.7361 |      |     |                        |                       |
| 5     | V\$OCT1_01 | 69     | 2215 | (+) | NNNNWTATGCAAATNTNN     | CAAAGCATGTAAGTATAAT   |
| M0016 |            | 0.8968 |      |     |                        |                       |
| 2     | V\$OCT1_06 | 75     | 2218 | (-) | CWNAWTKWSATRYN         | AGCATGTAAGTATA        |
| M0013 |            | 0.9146 |      |     |                        |                       |
| 7     | V\$OCT1_03 | 58     | 2226 | (+) | NNNRATAATNANN          | AGTATAATAAGAT         |
| M0016 |            |        |      |     |                        |                       |
| 2     | V\$OCT1_06 | 0.825  | 2228 | (+) | CWNAWTKWSATRYN         | TATAATAAGATACA        |

|       |            |        |      |     |                         |                     |
|-------|------------|--------|------|-----|-------------------------|---------------------|
| M0013 |            | 0.7927 |      |     |                         | ATAATAAGATACAGATGA- |
| 8     | V\$OCT1_04 | 65     | 2229 | (+) | NNNNNNNWATGCAAATNNNWNNW | TAATA               |
| M0013 |            | 0.8011 |      |     |                         | AGATACAGATGA-       |
| 8     | V\$OCT1_04 | 29     | 2235 | (+) | NNNNNNNWATGCAAATNNNWNNW | TAATATATTAT         |
| M0013 |            | 0.7514 |      |     |                         |                     |
| 5     | V\$OCT1_01 | 31     | 2237 | (+) | NNNNWTATGCAAATNTNNN     | ATACAGATGATAATATATT |
| M0013 |            | 0.8881 |      |     |                         | AATATATTATGTAAA-    |
| 8     | V\$OCT1_04 | 22     | 2248 | (+) | NNNNNNNWATGCAAATNNNWNNW | TATAAGAA            |
| M0013 |            | 0.8727 |      |     |                         |                     |
| 5     | V\$OCT1_01 | 58     | 2250 | (+) | NNNNWTATGCAAATNTNNN     | TATATTATGTAAATATAAG |
| M0016 |            | 0.8394 |      |     |                         |                     |
| 2     | V\$OCT1_06 | 53     | 2253 | (+) | CWNAWTKWSATRYN          | ATTATGTAAATATA      |
| M0016 |            |        |      |     |                         |                     |
| 2     | V\$OCT1_06 | 0.825  | 2253 | (-) | CWNAWTKWSATRYN          | ATTATGTAAATATA      |
| M0024 |            | 0.8471 |      |     |                         |                     |
| 8     | V\$OCT1_07 | 49     | 2253 | (+) | TNTATGNTAATT            | ATTATGTAAATA        |
| M0013 |            | 0.7804 |      |     |                         | TTATGTAAATATAAGAA-  |
| 8     | V\$OCT1_04 | 27     | 2254 | (+) | NNNNNNNWATGCAAATNNNWNNW | TATTAA              |
| M0013 |            | 0.8514 |      |     |                         |                     |
| 7     | V\$OCT1_03 | 42     | 2255 | (+) | NNNRTAATNANNN           | TATGTAAATATAA       |
| M0013 |            | 0.8573 |      |     |                         | TGTAAATATAAGAA-     |
| 8     | V\$OCT1_04 | 82     | 2257 | (-) | NNNNNNNWATGCAAATNNNWNNW | TATTAAATT           |
| M0013 |            | 0.7502 |      |     |                         |                     |
| 5     | V\$OCT1_01 | 86     | 2259 | (-) | NNNNWTATGCAAATNTNNN     | TAAATATAAGAATATTA   |
| M0013 |            | 0.7954 |      |     |                         | ATATAAGAATATTA      |
| 8     | V\$OCT1_04 | 83     | 2262 | (+) | NNNNNNNWATGCAAATNNNWNNW | TTTAA               |
| M0013 |            | 0.8624 |      |     |                         |                     |
| 6     | V\$OCT1_02 | 8      | 2263 | (-) | NNGAATATKCANNNN         | TATAAGAATATTA       |
| M0013 |            | 0.8386 |      |     |                         |                     |
| 6     | V\$OCT1_02 | 57     | 2266 | (+) | NNGAATATKCANNNN         | AAGAATATTA          |
| M0016 |            | 0.8292 |      |     |                         |                     |
| 2     | V\$OCT1_06 | 97     | 2268 | (+) | CWNAWTKWSATRYN          | GAATATTA            |
| M0016 |            | 0.9246 |      |     |                         |                     |
| 2     | V\$OCT1_06 | 09     | 2269 | (-) | CWNAWTKWSATRYN          | AATATTA             |
| M0013 |            | 0.8755 |      |     |                         |                     |
| 7     | V\$OCT1_03 | 43     | 2276 | (-) | NNNRTAATNANNN           | AATTGTTTATGAG       |
| M0013 |            | 0.8435 |      |     |                         |                     |
| 7     | V\$OCT1_03 | 4      | 2287 | (+) | NNNRTAATNANNN           | AGGATAATGTCAG       |
| M0013 |            | 0.7816 |      |     |                         | GAGAGGAAGTG-        |
| 8     | V\$OCT1_04 | 81     | 2319 | (+) | NNNNNNNWATGCAAATNNNWNNW | TATAAATTTTGA        |
| M0013 |            | 0.7906 |      |     |                         | TGTATAAATTTTGAAAC-  |
| 8     | V\$OCT1_04 | 73     | 2328 | (-) | NNNNNNNWATGCAAATNNNWNNW | CTATAA              |
| M0013 |            | 0.8664 |      |     |                         |                     |
| 7     | V\$OCT1_03 | 56     | 2344 | (+) | NNNRTAATNANNN           | CCTATAATCAAAG       |
| M0016 |            | 0.8265 |      |     |                         |                     |
| 2     | V\$OCT1_06 | 62     | 2346 | (-) | CWNAWTKWSATRYN          | TATAATCAAAGATG      |
| M0013 |            | 0.7953 |      |     |                         |                     |
| 5     | V\$OCT1_01 | 07     | 2370 | (+) | NNNNWTATGCAAATNTNNN     | TGCCTTATGTAAGTTATGA |
| M0016 |            | 0.8476 |      |     |                         |                     |
| 2     | V\$OCT1_06 | 56     | 2373 | (-) | CWNAWTKWSATRYN          | CTTATGTAAGTTAT      |
| M0024 |            | 0.8217 |      |     |                         |                     |
| 8     | V\$OCT1_07 | 09     | 2373 | (+) | TNTATGNTAATT            | CTTATGTAAGTT        |
| M0013 |            | 0.7973 |      |     |                         | TACACTTCTTCCA-      |
| 8     | V\$OCT1_04 | 65     | 2465 | (-) | NNNNNNNWATGCAAATNNNWNNW | TAAACATTT           |
| M0013 |            | 0.8015 |      |     |                         | TTCTTCCATAAACATTT-  |
| 8     | V\$OCT1_04 | 47     | 2471 | (-) | NNNNNNNWATGCAAATNNNWNNW | GAATTT              |
| M0013 |            | 0.8652 |      |     |                         |                     |
| 7     | V\$OCT1_03 | 71     | 2475 | (+) | NNNRTAATNANNN           | TCCATAAACATTT       |
| M0013 |            | 0.7659 |      |     |                         |                     |
| 5     | V\$OCT1_01 | 29     | 2479 | (-) | NNNNWTATGCAAATNTNNN     | TAAACATTTGAATTTACTG |
| M0016 |            | 0.8210 |      |     |                         |                     |
| 2     | V\$OCT1_06 | 94     | 2480 | (+) | CWNAWTKWSATRYN          | AAACATTTGAATTT      |
| M0016 |            | 0.8910 |      |     |                         |                     |
| 2     | V\$OCT1_06 | 16     | 2481 | (+) | CWNAWTKWSATRYN          | AACATTTGAATTTA      |
| M0016 |            | 0.8121 |      |     |                         |                     |
| 2     | V\$OCT1_06 | 09     | 2481 | (-) | CWNAWTKWSATRYN          | AACATTTGAATTTA      |

|       |            |        |      |     |                        |                      |
|-------|------------|--------|------|-----|------------------------|----------------------|
| M0019 |            | 0.7928 |      |     |                        |                      |
| 5     | V\$OCT1_Q6 | 49     | 2481 | (-) | NNNNATGCAAATNAN        | AACATTTGAATTTAC      |
| M0013 |            | 0.7934 |      |     |                        |                      |
| 6     | V\$OCT1_02 | 49     | 2483 | (-) | NNGAATATKCANNNN        | CATTTGAATTTACTG      |
| M0016 |            | 0.8343 |      |     |                        |                      |
| 2     | V\$OCT1_06 | 75     | 2502 | (+) | CWNAWTKWSATRYN         | AATATTTTCACTCC       |
| M0016 |            | 0.8082 |      |     |                        |                      |
| 2     | V\$OCT1_06 | 03     | 2529 | (-) | CWNAWTKWSATRYN         | TAAAAAGTAAGAAAC      |
| M0013 |            | 0.8423 |      |     |                        |                      |
| 7     | V\$OCT1_03 | 55     | 2548 | (+) | NNNRATAATNANNN         | ACCATAACAAGGA        |
| M0016 |            | 0.8394 |      |     |                        |                      |
| 2     | V\$OCT1_06 | 53     | 2561 | (+) | CWNAWTKWSATRYN         | CTTCTTTTAAAGTT       |
| M0013 |            | 0.7858 |      |     |                        | CAGAGAAAATGTAGAT-    |
| 8     | V\$OCT1_04 | 64     | 2586 | (+) | NNNNNNNWATGCAAATNNNWNW | TCCCAA               |
| M0013 |            | 0.7831 |      |     |                        |                      |
| 6     | V\$OCT1_02 | 62     | 2588 | (+) | NNGAATATKCANNNN        | GAGAAAATGTAGATT      |
| M0019 |            | 0.8335 |      |     |                        |                      |
| 5     | V\$OCT1_Q6 | 15     | 2590 | (+) | NNNNATGCAAATNAN        | GAAAATGTAGATTCC      |
| M0016 |            | 0.8343 |      |     |                        |                      |
| 2     | V\$OCT1_06 | 75     | 2591 | (+) | CWNAWTKWSATRYN         | AAAATGTAGATTCC       |
| M0016 |            | 0.8343 |      |     |                        |                      |
| 2     | V\$OCT1_06 | 75     | 2591 | (-) | CWNAWTKWSATRYN         | AAAATGTAGATTCC       |
| M0024 |            | 0.7930 |      |     |                        |                      |
| 8     | V\$OCT1_07 | 89     | 2591 | (+) | TNTATGNTAATT           | AAAATGTAGATT         |
| M0016 |            | 0.8003 |      |     |                        |                      |
| 2     | V\$OCT1_06 | 91     | 2610 | (-) | CWNAWTKWSATRYN         | CATCTCTCAAGCAT       |
| M0013 |            | 0.7804 |      |     |                        |                      |
| 6     | V\$OCT1_02 | 55     | 2618 | (+) | NNGAATATKCANNNN        | AAGCATATGTCAGAA      |
| M0016 |            | 0.9062 |      |     |                        |                      |
| 2     | V\$OCT1_06 | 5      | 2621 | (-) | CWNAWTKWSATRYN         | CATATGTCAGAATT       |
| M0016 |            | 0.8253 |      |     |                        |                      |
| 2     | V\$OCT1_06 | 91     | 2628 | (+) | CWNAWTKWSATRYN         | CAGAATTTCATCAT       |
| M0016 |            |        |      |     |                        |                      |
| 2     | V\$OCT1_06 | 0.85   | 2629 | (-) | CWNAWTKWSATRYN         | AGAATTTCATCATT       |
| M0016 |            | 0.8660 |      |     |                        |                      |
| 2     | V\$OCT1_06 | 16     | 2669 | (+) | CWNAWTKWSATRYN         | CATACTTTGATAGG       |
| M0016 |            | 0.8214 |      |     |                        |                      |
| 2     | V\$OCT1_06 | 84     | 2682 | (+) | CWNAWTKWSATRYN         | GAAACAGGGATGTG       |
| M0013 |            | 0.8411 |      |     |                        |                      |
| 7     | V\$OCT1_03 | 69     | 2740 | (+) | NNNRATAATNANNN         | GTGGTAAAGAATC        |
| M0016 |            | 0.8476 |      |     |                        |                      |
| 2     | V\$OCT1_06 | 56     | 2795 | (-) | CWNAWTKWSATRYN         | AAGATCCCATGGAG       |
| M0016 |            | 0.8160 |      |     |                        |                      |
| 2     | V\$OCT1_06 | 16     | 2880 | (+) | CWNAWTKWSATRYN         | GGCCATGAGTTGCA       |
| M0016 |            | 0.8136 |      |     |                        |                      |
| 2     | V\$OCT1_06 | 72     | 2928 | (+) | CWNAWTKWSATRYN         | CAACTTTGAAAATG       |
| M0019 |            | 0.8266 |      |     |                        |                      |
| 5     | V\$OCT1_Q6 | 92     | 2929 | (+) | NNNNATGCAAATNAN        | AACTTTGAAAATGAC      |
| M0016 |            | 0.8707 |      |     |                        |                      |
| 2     | V\$OCT1_06 | 03     | 2935 | (+) | CWNAWTKWSATRYN         | GAAAATGACTTGCC       |
| M0013 |            | 0.8086 |      |     |                        | ATAAC-               |
| 8     | V\$OCT1_04 | 57     | 2951 | (+) | NNNNNNNWATGCAAATNNNWNW | CTAATGCAAAGTCAACCC   |
| M0013 |            | 0.7846 |      |     |                        |                      |
| 5     | V\$OCT1_01 | 24     | 2953 | (+) | NNNNWTATGCAAATNTNNN    | AACCTAATGCAAAGTCAAC  |
| M0019 |            | 0.8021 |      |     |                        |                      |
| 5     | V\$OCT1_Q6 | 29     | 2955 | (+) | NNNNATGCAAATNAN        | CCTAATGCAAAGTCA      |
| M0016 |            | 0.8214 |      |     |                        |                      |
| 2     | V\$OCT1_06 | 84     | 2968 | (+) | CWNAWTKWSATRYN         | CAACCCTTCATTTT       |
| M0016 |            | 0.8265 |      |     |                        |                      |
| 2     | V\$OCT1_06 | 62     | 3008 | (+) | CWNAWTKWSATRYN         | GTTACAGAAATATT       |
| M0013 |            | 0.8421 |      |     |                        |                      |
| 6     | V\$OCT1_02 | 77     | 3010 | (-) | NNGAATATKCANNNN        | TACAGAAATATTCAT      |
| M0013 |            | 0.8015 |      |     |                        | TACAGAAATATTCAT-     |
| 8     | V\$OCT1_04 | 47     | 3010 | (-) | NNNNNNNWATGCAAATNNNWNW | ATCATACA             |
| M0013 |            | 0.8523 |      |     |                        | ACAGAAATATTCATATCAT- |
| 8     | V\$OCT1_04 | 63     | 3011 | (+) | NNNNNNNWATGCAAATNNNWNW | ACAG                 |

|       |            |        |      |     |                     |                     |
|-------|------------|--------|------|-----|---------------------|---------------------|
| M0013 |            | 0.7624 |      |     |                     |                     |
| 5     | V\$OCT1_01 | 95     | 3012 | (-) | NNNNWTATGCAAATNTNNN | CAGAAATATTCATATCATA |
| M0013 |            | 0.7346 |      |     |                     |                     |
| 5     | V\$OCT1_01 | 43     | 3013 | (+) | NNNNWTATGCAAATNTNNN | AGAAATATTCATATCATAC |
| M0013 |            | 0.9068 |      |     |                     |                     |
| 6     | V\$OCT1_02 | 76     | 3013 | (+) | NNGAATATKCANNNN     | AGAAATATTCATATC     |
| M0016 |            | 0.8472 |      |     |                     |                     |
| 2     | V\$OCT1_06 | 66     | 3014 | (+) | CWNAWTKWSATRYN      | GAAATATTCATATC      |
| M0016 |            | 0.8058 |      |     |                     |                     |
| 2     | V\$OCT1_06 | 59     | 3016 | (-) | CWNAWTKWSATRYN      | AATATTCATATCAT      |
| M0016 |            | 0.8472 |      |     |                     |                     |
| 2     | V\$OCT1_06 | 66     | 3019 | (+) | CWNAWTKWSATRYN      | ATTCATATCATACA      |
| M0013 |            | 0.8589 |      |     |                     |                     |
| 7     | V\$OCT1_03 | 49     | 3033 | (+) | NNNRTAATNANNN       | GTGATAAAGAAGG       |
| M0019 |            | 0.7961 |      |     |                     |                     |
| 5     | V\$OCT1_Q6 | 24     | 3051 | (-) | NNNNATGCAAATNAN     | ATGCTTCACATGAAG     |
| M0016 |            | 0.8601 |      |     |                     |                     |
| 2     | V\$OCT1_06 | 56     | 3052 | (-) | CWNAWTKWSATRYN      | TGCTTCACATGAAG      |
| M0016 |            | 0.8214 |      |     |                     |                     |
| 2     | V\$OCT1_06 | 84     | 3135 | (+) | CWNAWTKWSATRYN      | CAGCCTGTGCTGCC      |
| M0016 |            | 0.8398 |      |     |                     |                     |
| 2     | V\$OCT1_06 | 44     | 3182 | (+) | CWNAWTKWSATRYN      | CAGATTGGGCTTCT      |
| M0016 |            | 0.8554 |      |     |                     |                     |
| 2     | V\$OCT1_06 | 69     | 3220 | (+) | CWNAWTKWSATRYN      | CTGCTGCCATGCT       |
| M0016 |            |        |      |     |                     |                     |
| 2     | V\$OCT1_06 | 0.85   | 3221 | (-) | CWNAWTKWSATRYN      | TGCCTGCCATGCTG      |
| M0016 |            | 0.8070 |      |     |                     |                     |
| 2     | V\$OCT1_06 | 31     | 3312 | (+) | CWNAWTKWSATRYN      | GAGAATTCCATGGA      |
| M0016 |            | 0.8648 |      |     |                     |                     |
| 2     | V\$OCT1_06 | 44     | 3313 | (-) | CWNAWTKWSATRYN      | AGAATTCCATGGAC      |
| M0016 |            | 0.9246 |      |     |                     |                     |
| 2     | V\$OCT1_06 | 09     | 3356 | (+) | CWNAWTKWSATRYN      | GATACTTTCATTCA      |
| M0005 |            | 0.8060 |      |     |                     |                     |
| 9     | V\$YY1_01  | 29     | 20   | (+) | NNNNNCCATNTWNNNWN   | TGTCTTCCTTTTAGGAA   |
| M0005 |            | 0.8292 |      |     |                     |                     |
| 9     | V\$YY1_01  | 92     | 46   | (+) | NNNNNCCATNTWNNNWN   | TATTTTCATTATCTTT    |
| M0005 |            | 0.7824 |      |     |                     |                     |
| 9     | V\$YY1_01  | 38     | 97   | (+) | NNNNNCCATNTWNNNWN   | TAATAGCATTGTTCCAA   |
| M0005 |            | 0.8079 |      |     |                     |                     |
| 9     | V\$YY1_01  | 95     | 488  | (+) | NNNNNCCATNTWNNNWN   | GTTTCTCATTATCAAC    |
| M0005 |            | 0.8070 |      |     |                     |                     |
| 9     | V\$YY1_01  | 12     | 509  | (+) | NNNNNCCATNTWNNNWN   | TAAAAACATTTATTTAA   |
| M0005 |            | 0.8122 |      |     |                     |                     |
| 9     | V\$YY1_01  | 54     | 539  | (+) | NNNNNCCATNTWNNNWN   | TTTGTCCATGTTCCAGT   |
| M0005 |            | 0.7726 |      |     |                     |                     |
| 9     | V\$YY1_01  | 08     | 559  | (-) | NNNNNCCATNTWNNNWN   | TTTCATCCATGGAAAAT   |
| M0005 |            | 0.7984 |      |     |                     |                     |
| 9     | V\$YY1_01  | 93     | 608  | (-) | NNNNNCCATNTWNNNWN   | TATACATAATGAACCTA   |
| M0005 |            | 0.7909 |      |     |                     |                     |
| 9     | V\$YY1_01  | 57     | 677  | (+) | NNNNNCCATNTWNNNWN   | CATTGTCATTATGAAAT   |
| M0005 |            | 0.7732 |      |     |                     |                     |
| 9     | V\$YY1_01  | 63     | 679  | (-) | NNNNNCCATNTWNNNWN   | TTGTCATTATGAAATGC   |
| M0005 |            | 0.7942 |      |     |                     |                     |
| 9     | V\$YY1_01  | 33     | 684  | (-) | NNNNNCCATNTWNNNWN   | ATTATGAAATGCTTATA   |
| M0005 |            | 0.7925 |      |     |                     |                     |
| 9     | V\$YY1_01  | 95     | 738  | (-) | NNNNNCCATNTWNNNWN   | AAGAATATCTGGGATTC   |
| M0005 |            | 0.7935 |      |     |                     |                     |
| 9     | V\$YY1_01  | 78     | 813  | (+) | NNNNNCCATNTWNNNWN   | AATTTCCATGCATACAC   |
| M0005 |            | 0.8836 |      |     |                     |                     |
| 9     | V\$YY1_01  | 83     | 892  | (+) | NNNNNCCATNTWNNNWN   | TCTTGCCATTTAAAAAT   |
| M0005 |            | 0.8024 |      |     |                     |                     |
| 9     | V\$YY1_01  | 25     | 1017 | (-) | NNNNNCCATNTWNNNWN   | CTCCATCCATGGGATCT   |
| M0005 |            | 0.8643 |      |     |                     |                     |
| 9     | V\$YY1_01  | 51     | 1056 | (+) | NNNNNCCATNTWNNNWN   | GGTTGCCATTTCCACAC   |
| M0005 |            | 0.7719 |      |     |                     |                     |
| 9     | V\$YY1_01  | 53     | 1133 | (+) | NNNNNCCATNTWNNNWN   | TGACCCCATACACAGCA   |

|       |           |        |      |     |                      |                      |
|-------|-----------|--------|------|-----|----------------------|----------------------|
| M0006 |           | 0.7636 |      |     |                      |                      |
| 9     | V\$YY1_02 | 56     | 1145 | (+) | NNNCGGCCATCTTGNCTSNW | CAGCAGCCCACTAGGCTCCT |
| M0005 |           | 0.7830 |      |     |                      |                      |
| 9     | V\$YY1_01 | 93     | 1202 | (+) | NNNNNCCATNTWNNNWN    | GGTTGCCATTTCTTCT     |
| M0005 |           | 0.8132 |      |     |                      |                      |
| 9     | V\$YY1_01 | 37     | 1303 | (-) | NNNNNCCATNTWNNNWN    | CTCCATCCATGGGATTT    |
| M0005 |           | 0.7732 |      |     |                      |                      |
| 9     | V\$YY1_01 | 63     | 1545 | (+) | NNNNNCCATNTWNNNWN    | GATGTTCACTGATGCTC    |
| M0005 |           | 0.8594 |      |     |                      |                      |
| 9     | V\$YY1_01 | 36     | 1644 | (+) | NNNNNCCATNTWNNNWN    | AGGCTCCATGTTTTGGC    |
| M0005 |           | 0.8653 |      |     |                      |                      |
| 9     | V\$YY1_01 | 34     | 1737 | (-) | NNNNNCCATNTWNNNWN    | AAAAAAATATGGCATT     |
| M0005 |           | 0.8040 |      |     |                      |                      |
| 9     | V\$YY1_01 | 63     | 1764 | (+) | NNNNNCCATNTWNNNWN    | CATCACTATTTTTCATC    |
| M0005 |           | 0.8286 |      |     |                      |                      |
| 9     | V\$YY1_01 | 37     | 1855 | (+) | NNNNNCCATNTWNNNWN    | ATTAGCCATTTATACAT    |
| M0005 |           | 0.7883 |      |     |                      |                      |
| 9     | V\$YY1_01 | 36     | 1898 | (-) | NNNNNCCATNTWNNNWN    | ATGCCCAAATGAGCCTC    |
| M0005 |           | 0.7703 |      |     |                      |                      |
| 9     | V\$YY1_01 | 15     | 1945 | (+) | NNNNNCCATNTWNNNWN    | CTTCTCCAGATTTTACA    |
| M0005 |           | 0.8145 |      |     |                      |                      |
| 9     | V\$YY1_01 | 48     | 2015 | (-) | NNNNNCCATNTWNNNWN    | GTTTATCAATGAATCTA    |
| M0006 |           | 0.7581 |      |     |                      |                      |
| 9     | V\$YY1_02 | 22     | 2037 | (-) | NNNCGGCCATCTTGNCTSNW | ATCAGTCTTCATTGCCCTTT |
| M0005 |           | 0.8220 |      |     |                      |                      |
| 9     | V\$YY1_01 | 84     | 2046 | (+) | NNNNNCCATNTWNNNWN    | CATTGCCCTTTTCTAAT    |
| M0005 |           | 0.7863 |      |     |                      |                      |
| 9     | V\$YY1_01 | 7      | 2096 | (-) | NNNNNCCATNTWNNNWN    | AAGGAAATATGTGATTA    |
| M0005 |           | 0.7785 |      |     |                      |                      |
| 9     | V\$YY1_01 | 06     | 2119 | (-) | NNNNNCCATNTWNNNWN    | GAGTAAACTGTTATTA     |
| M0005 |           | 0.8695 |      |     |                      |                      |
| 9     | V\$YY1_01 | 94     | 2164 | (-) | NNNNNCCATNTWNNNWN    | AAGTAAACATGAAGTTC    |
| M0005 |           | 0.8089 |      |     |                      |                      |
| 9     | V\$YY1_01 | 78     | 2177 | (+) | NNNNNCCATNTWNNNWN    | GTTCTTCATTTTACCT     |
| M0005 |           | 0.7755 |      |     |                      |                      |
| 9     | V\$YY1_01 | 57     | 2214 | (+) | NNNNNCCATNTWNNNWN    | GCAAAGCATGTAAGTAT    |
| M0006 |           | 0.8639 |      |     |                      |                      |
| 9     | V\$YY1_02 | 77     | 2347 | (-) | NNNCGGCCATCTTGNCTSNW | ATAATCAAAGATGGCCTTGG |
| M0005 |           | 0.9053 |      |     |                      |                      |
| 9     | V\$YY1_01 | 08     | 2349 | (-) | NNNNNCCATNTWNNNWN    | AATCAAAGATGGCCTTG    |
| M0005 |           | 0.8165 |      |     |                      |                      |
| 9     | V\$YY1_01 | 14     | 2383 | (-) | NNNNNCCATNTWNNNWN    | TTATGAAGATGGACAAA    |
| M0005 |           | 0.7745 |      |     |                      |                      |
| 9     | V\$YY1_01 | 74     | 2535 | (-) | NNNNNCCATNTWNNNWN    | TAAGAAACATGAAACCA    |
| M0005 |           | 0.8361 |      |     |                      |                      |
| 9     | V\$YY1_01 | 73     | 2586 | (-) | NNNNNCCATNTWNNNWN    | CAGAGAAAATGTAGATT    |
| M0005 |           | 0.8574 |      |     |                      |                      |
| 9     | V\$YY1_01 | 71     | 2604 | (+) | NNNNNCCATNTWNNNWN    | CCAAACCATCTCTCAAG    |
| M0005 |           | 0.8348 |      |     |                      |                      |
| 9     | V\$YY1_01 | 62     | 2663 | (+) | NNNNNCCATNTWNNNWN    | AACAACCATACTTTGAT    |
| M0005 |           | 0.7830 |      |     |                      |                      |
| 9     | V\$YY1_01 | 93     | 2807 | (-) | NNNNNCCATNTWNNNWN    | AGAAGGAAATGGCAACC    |
| M0005 |           | 0.8718 |      |     |                      |                      |
| 9     | V\$YY1_01 | 87     | 2931 | (-) | NNNNNCCATNTWNNNWN    | CTTTGAAAATGACTTGC    |
| M0005 |           | 0.8178 |      |     |                      |                      |
| 9     | V\$YY1_01 | 24     | 2970 | (+) | NNNNNCCATNTWNNNWN    | ACCCTTCATTTCTCAAA    |
| M0005 |           | 0.7958 |      |     |                      |                      |
| 9     | V\$YY1_01 | 72     | 3021 | (+) | NNNNNCCATNTWNNNWN    | TCATATCATACAGTGAT    |
| M0005 |           | 0.7837 |      |     |                      |                      |
| 9     | V\$YY1_01 | 48     | 3176 | (+) | NNNNNCCATNTWNNNWN    | TCAGTTCAGATTGGGCT    |
| M0006 |           | 0.7915 |      |     |                      |                      |
| 9     | V\$YY1_02 | 03     | 3221 | (+) | NNNCGGCCATCTTGNCTSNW | TGCCTGCCATGCTGGAGACG |
| M0005 |           | 0.7807 |      |     |                      |                      |
| 9     | V\$YY1_01 | 99     | 3224 | (-) | NNNNNCCATNTWNNNWN    | CTGCCATGCTGGAGACG    |
| M0005 |           | 0.7804 |      |     |                      |                      |
| 9     | V\$YY1_01 | 72     | 3314 | (+) | NNNNNCCATNTWNNNWN    | GAATTCCATGGACTACA    |

|                        |            |         |      |     |                      |                   |
|------------------------|------------|---------|------|-----|----------------------|-------------------|
| M0006                  |            | 0.7791  |      |     |                      | CACAGTCCAGAGGGTT- |
| 9                      | V\$Y1_02   | 86      | 3329 | (-) | NNNCGGCCATCTTGNCTSNW | GCAA              |
| CSN2 <i>Ovis Aries</i> |            |         |      |     |                      |                   |
| M0025                  |            |         |      |     |                      |                   |
| 2                      | V\$TATA_01 | 0.77899 | 60   | (+) | STATAAAWRNNNNNN      | AGATATAATTTTCAGT  |
| M0025                  |            | 0.77721 |      |     |                      |                   |
| 2                      | V\$TATA_01 | 4       | 62   | (+) | STATAAAWRNNNNNN      | ATATAATTTTCAGTGT  |
| M0021                  |            | 0.79033 |      |     |                      |                   |
| 6                      | V\$TATA_C  | 5       | 104  | (+) | NCTATAAAAR           | AGGTTAAAAAT       |
| M0021                  |            | 0.78452 |      |     |                      |                   |
| 6                      | V\$TATA_C  | 6       | 120  | (+) | NCTATAAAAR           | AGAATATAAT        |
| M0025                  |            | 0.78736 |      |     |                      |                   |
| 2                      | V\$TATA_01 | 4       | 121  | (+) | STATAAAWRNNNNNN      | GAATATAATTGCTTA   |
| M0025                  |            | 0.78000 |      |     |                      |                   |
| 2                      | V\$TATA_01 | 5       | 123  | (+) | STATAAAWRNNNNNN      | ATATAATTGCTTAAA   |
| M0021                  |            | 0.88354 |      |     |                      |                   |
| 6                      | V\$TATA_C  | 9       | 130  | (+) | NCTATAAAAR           | TGCTTAAAAAT       |
| M0021                  |            | 0.85555 |      |     |                      |                   |
| 6                      | V\$TATA_C  | 8       | 142  | (+) | NCTATAAAAR           | ATCTTAAAAA        |
| M0021                  |            | 0.82360 |      |     |                      |                   |
| 6                      | V\$TATA_C  | 7       | 143  | (+) | NCTATAAAAR           | TCTTAAAAAT        |
| M0025                  |            | 0.78431 |      |     |                      |                   |
| 2                      | V\$TATA_01 | 9       | 143  | (+) | STATAAAWRNNNNNN      | TCTTAAAAATAAGGG   |
| M0025                  |            | 0.77873 |      |     |                      |                   |
| 2                      | V\$TATA_01 | 6       | 145  | (+) | STATAAAWRNNNNNN      | TTAAAAATAAGGGTG   |
| M0021                  |            | 0.78901 |      |     |                      |                   |
| 6                      | V\$TATA_C  | 5       | 158  | (+) | NCTATAAAAR           | TGTTTAAGAT        |
| M0021                  |            | 0.76947 |      |     |                      |                   |
| 6                      | V\$TATA_C  | 5       | 193  | (+) | NCTATAAAAR           | ATGTTAAAAA        |
| M0021                  |            | 0.80644 |      |     |                      |                   |
| 6                      | V\$TATA_C  | 3       | 194  | (+) | NCTATAAAAR           | TGTTAAAAAA        |
| M0021                  |            | 0.76445 |      |     |                      |                   |
| 6                      | V\$TATA_C  | 7       | 195  | (+) | NCTATAAAAR           | GTAAAAAAAT        |
| M0021                  |            | 0.85951 |      |     |                      |                   |
| 6                      | V\$TATA_C  | 9       | 212  | (+) | NCTATAAAAR           | ACTATAAAGA        |
| M0025                  |            | 0.82720 |      |     |                      |                   |
| 2                      | V\$TATA_01 | 1       | 213  | (+) | STATAAAWRNNNNNN      | CTATAAAGATTTGAT   |
| M0021                  |            | 0.80221 |      |     |                      |                   |
| 6                      | V\$TATA_C  | 8       | 223  | (+) | NCTATAAAAR           | TTGATAAAAA        |
| M0021                  |            | 0.77977 |      |     |                      |                   |
| 6                      | V\$TATA_C  | 3       | 256  | (+) | NCTATAAAAR           | GGAATATAAT        |
| M0025                  |            | 0.82263 |      |     |                      |                   |
| 2                      | V\$TATA_01 | 4       | 257  | (+) | STATAAAWRNNNNNN      | GAATATAATAAGATG   |
| M0021                  |            | 0.74465 |      |     |                      |                   |
| 6                      | V\$TATA_C  | 3       | 258  | (+) | NCTATAAAAR           | AATATAATAA        |
| M0025                  |            | 0.80512 |      |     |                      |                   |
| 2                      | V\$TATA_01 | 6       | 259  | (+) | STATAAAWRNNNNNN      | ATATAATAAGATGTA   |
| M0021                  |            | 0.81462 |      |     |                      |                   |
| 6                      | V\$TATA_C  | 9       | 293  | (+) | NCTATAAAAR           | TCTTTAACAC        |
| M0021                  |            | 0.83205 |      |     |                      |                   |
| 6                      | V\$TATA_C  | 7       | 320  | (+) | NCTATAAAAR           | TGTATTAAAA        |
| M0021                  |            | 0.80908 |      |     |                      |                   |
| 6                      | V\$TATA_C  | 4       | 321  | (+) | NCTATAAAAR           | GTATTAAAAG        |
| M0025                  |            |         |      |     |                      |                   |
| 2                      | V\$TATA_01 | 0.86171 | 321  | (+) | STATAAAWRNNNNNN      | GTATTAAAAGATCTT   |
| M0021                  |            | 0.83865 |      |     |                      |                   |
| 6                      | V\$TATA_C  | 9       | 377  | (+) | NCTATAAAAR           | GCCATAAAGG        |
| M0025                  |            | 0.84039 |      |     |                      |                   |
| 2                      | V\$TATA_01 | 6       | 378  | (+) | STATAAAWRNNNNNN      | CCATAAAGGCAAGCA   |
| M0021                  |            | 0.78558 |      |     |                      |                   |
| 6                      | V\$TATA_C  | 2       | 443  | (+) | NCTATAAAAR           | CCAACAAAAA        |
| M0025                  |            |         |      |     |                      |                   |
| 2                      | V\$TATA_01 | 0.85968 | 453  | (+) | STATAAAWRNNNNNN      | GTTTATAGAGCTAGC   |
| M0025                  |            | 0.77670 |      |     |                      |                   |
| 2                      | V\$TATA_01 | 6       | 466  | (+) | STATAAAWRNNNNNN      | GCATATTTAGTCAAG   |

|       |            |         |     |     |                  |                  |
|-------|------------|---------|-----|-----|------------------|------------------|
| M0025 |            | 0.82136 |     |     |                  |                  |
| 2     | V\$TATA_01 | 5       | 481 | (+) | STATAAAWRNNNNNNN | AGATAAGAGGGTTG   |
| M0025 |            |         |     |     |                  |                  |
| 2     | V\$TATA_01 | 0.81629 | 499 | (+) | STATAAAWRNNNNNNN | GGATATATATGCTAT  |
| M0025 |            | 0.84445 |     |     |                  |                  |
| 2     | V\$TATA_01 | 6       | 501 | (+) | STATAAAWRNNNNNNN | ATATATATGCTATTT  |
| M0025 |            | 0.82136 |     |     |                  |                  |
| 2     | V\$TATA_01 | 5       | 521 | (+) | STATAAAWRNNNNNNN | GTATTTATAAAAGAA  |
| M0021 |            | 0.78373 |     |     |                  |                  |
| 6     | V\$TATA_C  | 4       | 522 | (+) | NCTATAAAAR       | TATTTATAAA       |
| M0025 |            | 0.84876 |     |     |                  |                  |
| 2     | V\$TATA_01 | 9       | 523 | (+) | STATAAAWRNNNNNNN | ATTTATAAAAGAAGA  |
| M0021 |            | 0.92711 |     |     |                  |                  |
| 6     | V\$TATA_C  | 9       | 524 | (+) | NCTATAAAAR       | TTTATAAAAG       |
| M0025 |            | 0.90433 |     |     |                  |                  |
| 2     | V\$TATA_01 | 9       | 525 | (+) | STATAAAWRNNNNNNN | TTATAAAAGAAGAGT  |
| M0025 |            | 0.81324 |     |     |                  |                  |
| 2     | V\$TATA_01 | 5       | 538 | (+) | STATAAAWRNNNNNNN | GTATATTTATCAAAA  |
| M0025 |            | 0.78457 |     |     |                  |                  |
| 2     | V\$TATA_01 | 2       | 540 | (+) | STATAAAWRNNNNNNN | ATATTTATCAAAATT  |
| M0021 |            | 0.79376 |     |     |                  |                  |
| 6     | V\$TATA_C  | 8       | 543 | (+) | NCTATAAAAR       | TTTATCAAAA       |
| M0021 |            | 0.77369 |     |     |                  |                  |
| 6     | V\$TATA_C  | 9       | 588 | (+) | NCTATAAAAR       | ATCTTATAAT       |
| M0021 |            | 0.77581 |     |     |                  |                  |
| 6     | V\$TATA_C  | 2       | 590 | (+) | NCTATAAAAR       | CTTATAATAT       |
| M0021 |            | 0.76102 |     |     |                  |                  |
| 6     | V\$TATA_C  | 5       | 598 | (+) | NCTATAAAAR       | ATTTCAAAAA       |
| M0021 |            | 0.74465 |     |     |                  |                  |
| 6     | V\$TATA_C  | 3       | 606 | (+) | NCTATAAAAR       | AATATTAAAA       |
| M0021 |            | 0.78505 |     |     |                  |                  |
| 6     | V\$TATA_C  | 4       | 607 | (+) | NCTATAAAAR       | ATATTAAAAAT      |
| M0025 |            | 0.84673 |     |     |                  |                  |
| 2     | V\$TATA_01 | 9       | 607 | (+) | STATAAAWRNNNNNNN | ATATTAAAAATAGATA |
| M0025 |            | 0.78025 |     |     |                  |                  |
| 2     | V\$TATA_01 | 9       | 638 | (+) | STATAAAWRNNNNNNN | AAATTAAAGAGAAAAG |
| M0021 |            | 0.82017 |     |     |                  |                  |
| 6     | V\$TATA_C  | 4       | 663 | (+) | NCTATAAAAR       | GGTAAAAAAA       |
| M0025 |            | 0.78025 |     |     |                  |                  |
| 2     | V\$TATA_01 | 9       | 664 | (+) | STATAAAWRNNNNNNN | GTAAAAAAAAAATTC  |
| M0021 |            | 0.77898 |     |     |                  |                  |
| 6     | V\$TATA_C  | 1       | 710 | (+) | NCTATAAAAR       | ACAATGAAAA       |
| M0021 |            | 0.88909 |     |     |                  |                  |
| 6     | V\$TATA_C  | 4       | 769 | (+) | NCTATAAAAR       | GGCTTAAAAA       |
| M0021 |            | 0.81172 |     |     |                  |                  |
| 6     | V\$TATA_C  | 4       | 770 | (+) | NCTATAAAAR       | GCTTAAAAAT       |
| M0025 |            | 0.78787 |     |     |                  |                  |
| 2     | V\$TATA_01 | 1       | 770 | (+) | STATAAAWRNNNNNNN | GCTTAAAAATTGGTA  |
| M0021 |            |         |     |     |                  |                  |
| 6     | V\$TATA_C  | 0.87774 | 781 | (+) | NCTATAAAAR       | GGTATATAAA       |
| M0025 |            | 0.88277 |     |     |                  |                  |
| 2     | V\$TATA_01 | 1       | 782 | (+) | STATAAAWRNNNNNNN | GTATATAAAATGCTA  |
| M0021 |            | 0.85635 |     |     |                  |                  |
| 6     | V\$TATA_C  | 1       | 783 | (+) | NCTATAAAAR       | TATATAAAAT       |
| M0025 |            | 0.90230 |     |     |                  |                  |
| 2     | V\$TATA_01 | 9       | 784 | (+) | STATAAAWRNNNNNNN | ATATAAAATGCTAGT  |
| M0021 |            | 0.88645 |     |     |                  |                  |
| 6     | V\$TATA_C  | 4       | 797 | (+) | NCTATAAAAR       | GTTATAAAAT       |
| M0025 |            | 0.82263 |     |     |                  |                  |
| 2     | V\$TATA_01 | 4       | 798 | (+) | STATAAAWRNNNNNNN | TTATAAAATAAACAA  |
| M0021 |            |         |     |     |                  |                  |
| 6     | V\$TATA_C  | 0.7568  | 816 | (+) | NCTATAAAAR       | GCAATAATAT       |
| M0021 |            | 0.90097 |     |     |                  |                  |
| 6     | V\$TATA_C  | 7       | 877 | (+) | NCTATAAAAR       | ACAATAAAAA       |
| M0025 |            | 0.77619 |     |     |                  |                  |
| 2     | V\$TATA_01 | 9       | 878 | (+) | STATAAAWRNNNNNNN | CAATAAAAAATTTTT  |



|       |            |         |      |     |                 |                  |
|-------|------------|---------|------|-----|-----------------|------------------|
| M0021 |            | 0.74359 |      |     |                 |                  |
| 6     | V\$TATA_C  | 7       | 889  | (+) | NCTATAAAAR      | TTTTAGAAC        |
| M0021 |            | 0.76947 |      |     |                 |                  |
| 6     | V\$TATA_C  | 5       | 897  | (+) | NCTATAAAAR      | ACTTTATAGA       |
| M0025 |            | 0.80360 |      |     |                 |                  |
| 2     | V\$TATA_01 | 3       | 898  | (+) | STATAAAWRNNNNNN | CTTTATAGACATCTT  |
| M0025 |            | 0.80030 |      |     |                 |                  |
| 2     | V\$TATA_01 | 4       | 913  | (+) | STATAAAWRNNNNNN | GAATAAAGTGAAACA  |
| M0021 |            | 0.74650 |      |     |                 |                  |
| 6     | V\$TATA_C  | 1       | 953  | (+) | NCTATAAAAR      | AATATAGAAA       |
| M0021 |            | 0.75178 |      |     |                 |                  |
| 6     | V\$TATA_C  | 2       | 955  | (+) | NCTATAAAAR      | TATAGAAAAA       |
| M0021 |            | 0.79931 |      |     |                 |                  |
| 6     | V\$TATA_C  | 3       | 977  | (+) | NCTATAAAAR      | AGTTTGAAAA       |
| M0025 |            | 0.78863 |      |     |                 |                  |
| 2     | V\$TATA_01 | 2       | 978  | (+) | STATAAAWRNNNNNN | GTTTGAAAATCTGGG  |
| M0021 |            | 0.74914 |      |     |                 |                  |
| 6     | V\$TATA_C  | 2       | 1045 | (+) | NCTATAAAAR      | AACTTATAAA       |
| M0021 |            | 0.91523 |      |     |                 |                  |
| 6     | V\$TATA_C  | 6       | 1047 | (+) | NCTATAAAAR      | CTTATAAAAA       |
| M0025 |            | 0.90002 |      |     |                 |                  |
| 2     | V\$TATA_01 | 5       | 1048 | (+) | STATAAAWRNNNNNN | TTATAAAAATGCAAC  |
| M0025 |            | 0.77112 |      |     |                 |                  |
| 2     | V\$TATA_01 | 4       | 1050 | (+) | STATAAAWRNNNNNN | ATAAAAAATGCAACAA |
| M0021 |            | 0.74782 |      |     |                 |                  |
| 6     | V\$TATA_C  | 1       | 1058 | (+) | NCTATAAAAR      | GCAACAAAAC       |
| M0021 |            | 0.75019 |      |     |                 |                  |
| 6     | V\$TATA_C  | 8       | 1070 | (+) | NCTATAAAAR      | ACCATTTAAT       |
| M0025 |            | 0.79599 |      |     |                 |                  |
| 2     | V\$TATA_01 | 1       | 1185 | (+) | STATAAAWRNNNNNN | AGATAAGTACACAGT  |
| M0025 |            | 0.78558 |      |     |                 |                  |
| 2     | V\$TATA_01 | 7       | 1201 | (+) | STATAAAWRNNNNNN | CTATGTAGAGAAAAT  |
| M0021 |            | 0.85740 |      |     |                 |                  |
| 6     | V\$TATA_C  | 7       | 1231 | (+) | NCTATAAAAR      | TCTCTAAAAT       |
| M0021 |            | 0.75917 |      |     |                 |                  |
| 6     | V\$TATA_C  | 6       | 1316 | (+) | NCTATAAAAR      | CCAAGAAAAC       |
| M0021 |            | 0.79271 |      |     |                 |                  |
| 6     | V\$TATA_C  | 2       | 1382 | (+) | NCTATAAAAR      | GAAATAAAAG       |
| M0025 |            | 0.78051 |      |     |                 |                  |
| 2     | V\$TATA_01 | 3       | 1383 | (+) | STATAAAWRNNNNNN | AAATAAAAGATATGA  |
| M0025 |            |         |      |     |                 |                  |
| 2     | V\$TATA_01 | 0.78102 | 1392 | (+) | STATAAAWRNNNNNN | ATATGAATAAGACAA  |
| M0021 |            | 0.76630 |      |     |                 |                  |
| 6     | V\$TATA_C  | 6       | 1410 | (+) | NCTATAAAAR      | TTCATGAAAA       |
| M0021 |            | 0.74306 |      |     |                 |                  |
| 6     | V\$TATA_C  | 8       | 1411 | (+) | NCTATAAAAR      | TCATGAAAAT       |
| M0021 |            | 0.75310 |      |     |                 |                  |
| 6     | V\$TATA_C  | 3       | 1440 | (+) | NCTATAAAAR      | AAGATAAAAA       |
| M0025 |            | 0.83836 |      |     |                 |                  |
| 2     | V\$TATA_01 | 6       | 1441 | (+) | STATAAAWRNNNNNN | AGATAAAAAATAAAGT |
| M0021 |            | 0.75970 |      |     |                 |                  |
| 6     | V\$TATA_C  | 4       | 1494 | (+) | NCTATAAAAR      | TCAAGAAAAC       |
| M0021 |            | 0.89622 |      |     |                 |                  |
| 6     | V\$TATA_C  | 4       | 1575 | (+) | NCTATAAAAR      | GCAATAAAAA       |
| M0025 |            | 0.80131 |      |     |                 |                  |
| 2     | V\$TATA_01 | 9       | 1576 | (+) | STATAAAWRNNNNNN | CAATAAAAAATAATAA |
| M0025 |            | 0.78203 |      |     |                 |                  |
| 2     | V\$TATA_01 | 5       | 1585 | (+) | STATAAAWRNNNNNN | TAATAAATATATATT  |
| M0025 |            | 0.77163 |      |     |                 |                  |
| 2     | V\$TATA_01 | 2       | 1591 | (+) | STATAAAWRNNNNNN | ATATATATTTTTTAA  |
| M0021 |            | 0.76815 |      |     |                 |                  |
| 6     | V\$TATA_C  | 4       | 1599 | (+) | NCTATAAAAR      | TTTTTAATAA       |
| M0021 |            | 0.75283 |      |     |                 |                  |
| 6     | V\$TATA_C  | 9       | 1630 | (+) | NCTATAAAAR      | TCTGTAAATA       |
| M0025 |            |         |      |     |                 |                  |
| 2     | V\$TATA_01 | 0.78508 | 1631 | (+) | STATAAAWRNNNNNN | CTGTAAATATCTGTA  |

|       |            |         |      |     |                 |                  |
|-------|------------|---------|------|-----|-----------------|------------------|
| M0021 |            | 0.77105 |      |     |                 |                  |
| 6     | V\$TATA_C  | 9       | 1725 | (+) | NCTATAAAAR      | AGCAGAAAAC       |
| M0021 |            | 0.74544 |      |     |                 |                  |
| 6     | V\$TATA_C  | 5       | 1806 | (+) | NCTATAAAAR      | GCCATATGAT       |
| M0021 |            |         |      |     |                 |                  |
| 6     | V\$TATA_C  | 0.77766 | 1811 | (+) | NCTATAAAAR      | ATGATAAAAT       |
| M0021 |            | 0.74201 |      |     |                 |                  |
| 6     | V\$TATA_C  | 2       | 1820 | (+) | NCTATAAAAR      | TGTTTATTAA       |
| M0021 |            | 0.78452 |      |     |                 |                  |
| 6     | V\$TATA_C  | 6       | 1834 | (+) | NCTATAAAAR      | TTTCTAAAT        |
| M0021 |            | 0.74914 |      |     |                 |                  |
| 6     | V\$TATA_C  | 2       | 1964 | (+) | NCTATAAAAR      | TCCTTGTAAG       |
| M0025 |            | 0.78152 |      |     |                 |                  |
| 2     | V\$TATA_01 | 8       | 1987 | (+) | STATAAAWRNNNNNN | ACTTAAATAAGAAAA  |
| M0021 |            | 0.74016 |      |     |                 |                  |
| 6     | V\$TATA_C  | 4       | 1988 | (+) | NCTATAAAAR      | CTTAAATAAG       |
| M0025 |            | 0.80436 |      |     |                 |                  |
| 2     | V\$TATA_01 | 4       | 2132 | (+) | STATAAAWRNNNNNN | AAATAAAATAAGACTA |
| M0025 |            | 0.78381 |      |     |                 |                  |
| 2     | V\$TATA_01 | 1       | 2134 | (+) | STATAAAWRNNNNNN | ATAAATAAGACTAGT  |
| M0021 |            | 0.81462 |      |     |                 |                  |
| 6     | V\$TATA_C  | 9       | 2163 | (+) | NCTATAAAAR      | TGTAGAAAAAT      |
| M0025 |            | 0.81349 |      |     |                 |                  |
| 2     | V\$TATA_01 | 9       | 2164 | (+) | STATAAAWRNNNNNN | GTAGAAAAATCGCATT |
| M0021 |            | 0.77053 |      |     |                 |                  |
| 6     | V\$TATA_C  | 1       | 2185 | (+) | NCTATAAAAR      | ATCATAAATG       |
| M0025 |            | 0.80208 |      |     |                 |                  |
| 2     | V\$TATA_01 | 1       | 2186 | (+) | STATAAAWRNNNNNN | TCATAAATGTATAAA  |
| M0021 |            | 0.83205 |      |     |                 |                  |
| 6     | V\$TATA_C  | 7       | 2193 | (+) | NCTATAAAAR      | TGTATAAATA       |
| M0025 |            | 0.88708 |      |     |                 |                  |
| 2     | V\$TATA_01 | 4       | 2194 | (+) | STATAAAWRNNNNNN | GTATAAATAATGCAC  |
| M0021 |            | 0.74412 |      |     |                 |                  |
| 6     | V\$TATA_C  | 5       | 2231 | (+) | NCTATAAAAR      | GCTAAGAAAAG      |
| M0021 |            | 0.74597 |      |     |                 |                  |
| 6     | V\$TATA_C  | 3       | 2337 | (+) | NCTATAAAAR      | CCTAAAGAAA       |
| M0021 |            | 0.74438 |      |     |                 |                  |
| 6     | V\$TATA_C  | 9       | 2396 | (+) | NCTATAAAAR      | AGAACAAAAA       |
| M0025 |            | 0.77975 |      |     |                 |                  |
| 2     | V\$TATA_01 | 1       | 2418 | (+) | STATAAAWRNNNNNN | GCACAAATACAATTG  |
| M0021 |            | 0.80221 |      |     |                 |                  |
| 6     | V\$TATA_C  | 8       | 2446 | (+) | NCTATAAAAR      | TCTAGATAAA       |
| M0025 |            | 0.77949 |      |     |                 |                  |
| 2     | V\$TATA_01 | 8       | 2447 | (+) | STATAAAWRNNNNNN | CTAGATAAATATATC  |
| M0025 |            | 0.79167 |      |     |                 |                  |
| 2     | V\$TATA_01 | 7       | 2449 | (+) | STATAAAWRNNNNNN | AGATAAATATATCTT  |
| M0021 |            | 0.75257 |      |     |                 |                  |
| 6     | V\$TATA_C  | 5       | 2564 | (+) | NCTATAAAAR      | ACAATAATAC       |
| M0025 |            | 0.77213 |      |     |                 |                  |
| 2     | V\$TATA_01 | 9       | 2570 | (+) | STATAAAWRNNNNNN | ATACATATGTTTCATA |
| M0021 |            | 0.78663 |      |     |                 |                  |
| 6     | V\$TATA_C  | 9       | 2585 | (+) | NCTATAAAAR      | ATTATAATAA       |
| M0025 |            | 0.78888 |      |     |                 |                  |
| 2     | V\$TATA_01 | 6       | 2586 | (+) | STATAAAWRNNNNNN | TTATAATAAAAAAGTG |
| M0021 |            | 0.82809 |      |     |                 |                  |
| 6     | V\$TATA_C  | 6       | 2588 | (+) | NCTATAAAAR      | ATAATAAAAA       |
| M0025 |            | 0.79142 |      |     |                 |                  |
| 2     | V\$TATA_01 | 3       | 2589 | (+) | STATAAAWRNNNNNN | TAATAAAAAAGTGTC  |
| M0021 |            | 0.79429 |      |     |                 |                  |
| 6     | V\$TATA_C  | 6       | 2602 | (+) | NCTATAAAAR      | TCAGTAAAAA       |
| M0021 |            | 0.74306 |      |     |                 |                  |
| 6     | V\$TATA_C  | 8       | 2609 | (+) | NCTATAAAAR      | AAATTAAAAAT      |
| M0021 |            |         |      |     |                 |                  |
| 6     | V\$TATA_C  | 0.9493  | 2635 | (+) | NCTATAAAAR      | GCCATAAAAA       |
| M0025 |            | 0.84953 |      |     |                 |                  |
| 2     | V\$TATA_01 | 1       | 2636 | (+) | STATAAAWRNNNNNN | CCATAAAAACTCTTC  |

|       |            |         |      |     |                  |                 |
|-------|------------|---------|------|-----|------------------|-----------------|
| M0025 |            | 0.80385 |      |     |                  |                 |
| 2     | V\$TATA_01 | 7       | 2683 | (+) | STATAAAWRNNNNNNN | CTATTAATTTAAAAT |
| M0021 |            | 0.82360 |      |     |                  |                 |
| 6     | V\$TATA_C  | 7       | 2688 | (+) | NCTATAAAAR       | AATTTAAAAAT     |
| M0025 |            |         |      |     |                  |                 |
| 2     | V\$TATA_01 | 0.79726 | 2689 | (+) | STATAAAWRNNNNNNN | ATTTAAAATACTCTC |
| M0021 |            | 0.74570 |      |     |                  |                 |
| 6     | V\$TATA_C  | 9       | 2698 | (+) | NCTATAAAAR       | ACTCTCAAAA      |
| M0021 |            | 0.74016 |      |     |                  |                 |
| 6     | V\$TATA_C  | 4       | 2699 | (+) | NCTATAAAAR       | CTCTCAAAAA      |
| M0021 |            | 0.75283 |      |     |                  |                 |
| 6     | V\$TATA_C  | 9       | 2700 | (+) | NCTATAAAAR       | TCTCAAAAAA      |
| M0021 |            | 0.81410 |      |     |                  |                 |
| 6     | V\$TATA_C  | 1       | 2710 | (+) | NCTATAAAAR       | CGTATAACAT      |
| M0025 |            | 0.77670 |      |     |                  |                 |
| 2     | V\$TATA_01 | 6       | 2785 | (+) | STATAAAWRNNNNNNN | ATATTTAATAATGAG |
| M0025 |            |         |      |     |                  |                 |
| 2     | V\$TATA_01 | 0.79117 | 2875 | (+) | STATAAAWRNNNNNNN | ATTTTTATACAAAGA |
| M0021 |            | 0.79561 |      |     |                  |                 |
| 6     | V\$TATA_C  | 7       | 2878 | (+) | NCTATAAAAR       | TTTATACAAA      |
| M0025 |            | 0.77924 |      |     |                  |                 |
| 2     | V\$TATA_01 | 4       | 2879 | (+) | STATAAAWRNNNNNNN | TTATACAAAGAAAAA |
| M0021 |            | 0.85027 |      |     |                  |                 |
| 6     | V\$TATA_C  | 7       | 2904 | (+) | NCTATAAAAR       | ACTGTAAAAT      |
| M0025 |            | 0.77036 |      |     |                  |                 |
| 2     | V\$TATA_01 | 3       | 2905 | (+) | STATAAAWRNNNNNNN | CTGTAAAATAGTAAC |
| M0021 |            | 0.77607 |      |     |                  |                 |
| 6     | V\$TATA_C  | 6       | 2971 | (+) | NCTATAAAAR       | CCTTTATAGA      |
| M0025 |            | 0.81781 |      |     |                  |                 |
| 2     | V\$TATA_01 | 3       | 2972 | (+) | STATAAAWRNNNNNNN | CTTTATAGACTGTGG |
| M0021 |            | 0.74782 |      |     |                  |                 |
| 6     | V\$TATA_C  | 1       | 3048 | (+) | NCTATAAAAR       | GCAACAAAAC      |
| M0025 |            | 0.82364 |      |     |                  |                 |
| 2     | V\$TATA_01 | 9       | 3079 | (+) | STATAAAWRNNNNNNN | ACATTAATGGCAACC |
| M0021 |            | 0.76419 |      |     |                  |                 |
| 6     | V\$TATA_C  | 3       | 3365 | (+) | NCTATAAAAR       | TCTCTAATAG      |
| M0021 |            | 0.75019 |      |     |                  |                 |
| 6     | V\$TATA_C  | 8       | 3520 | (+) | NCTATAAAAR       | TGTATATATT      |
| M0025 |            | 0.85079 |      |     |                  |                 |
| 2     | V\$TATA_01 | 9       | 3521 | (+) | STATAAAWRNNNNNNN | GTATATATTTTAAAG |
| M0021 |            | 0.77237 |      |     |                  |                 |
| 6     | V\$TATA_C  | 9       | 3527 | (+) | NCTATAAAAR       | ATTTTAAAGG      |
| M0021 |            |         |      |     |                  |                 |
| 6     | V\$TATA_C  | 0.75099 | 3535 | (+) | NCTATAAAAR       | GGAATAAATG      |
| M0025 |            | 0.84978 |      |     |                  |                 |
| 2     | V\$TATA_01 | 4       | 3536 | (+) | STATAAAWRNNNNNNN | GAATAAATGTGTAGA |
| M0021 |            | 0.77713 |      |     |                  |                 |
| 6     | V\$TATA_C  | 2       | 3552 | (+) | NCTATAAAAR       | GGTTTAACAT      |
| M0025 |            | 0.77264 |      |     |                  |                 |
| 2     | V\$TATA_01 | 7       | 3689 | (+) | STATAAAWRNNNNNNN | GCATTTATTGAGCAC |
| M0021 |            | 0.76947 |      |     |                  |                 |
| 6     | V\$TATA_C  | 5       | 3758 | (+) | NCTATAAAAR       | ACTTTGTAAA      |
| M0021 |            | 0.77185 |      |     |                  |                 |
| 6     | V\$TATA_C  | 1       | 3818 | (+) | NCTATAAAAR       | AGTAAATAAG      |
| M0025 |            | 0.79446 |      |     |                  |                 |
| 2     | V\$TATA_01 | 8       | 3819 | (+) | STATAAAWRNNNNNNN | GTAAATAAGAGGCAT |
| M0025 |            | 0.77467 |      |     |                  |                 |
| 2     | V\$TATA_01 | 6       | 3821 | (+) | STATAAAWRNNNNNNN | AAATAAGAGGCATTG |
| M0025 |            | 0.77822 |      |     |                  |                 |
| 2     | V\$TATA_01 | 9       | 3921 | (+) | STATAAAWRNNNNNNN | GGTTAAATAGTGCAT |
| M0025 |            | 0.78330 |      |     |                  |                 |
| 2     | V\$TATA_01 | 4       | 3962 | (+) | STATAAAWRNNNNNNN | ACATAAGATCCTATG |
| M0021 |            | 0.81594 |      |     |                  |                 |
| 6     | V\$TATA_C  | 9       | 4113 | (+) | NCTATAAAAR       | TGCATGAAAG      |
| M0025 |            | 0.77848 |      |     |                  |                 |
| 2     | V\$TATA_01 | 3       | 4114 | (+) | STATAAAWRNNNNNNN | GCATGAAAGTGAAAA |

|       |            |         |      |     |                 |                  |
|-------|------------|---------|------|-----|-----------------|------------------|
| M0021 |            | 0.76049 |      |     |                 |                  |
| 6     | V\$TATA_C  | 6       | 4259 | (+) | NCTATAAAAR      | TCCTTATAGG       |
| M0021 |            | 0.78082 |      |     |                 |                  |
| 6     | V\$TATA_C  | 9       | 4280 | (+) | NCTATAAAAR      | TTCTTATAAT       |
| M0021 |            | 0.77369 |      |     |                 |                  |
| 6     | V\$TATA_C  | 9       | 4290 | (+) | NCTATAAAAR      | TCATTAGAAG       |
| M0021 |            | 0.80987 |      |     |                 |                  |
| 6     | V\$TATA_C  | 6       | 4337 | (+) | NCTATAAAAR      | GCCATGAAAT       |
| M0021 |            | 0.77185 |      |     |                 |                  |
| 6     | V\$TATA_C  | 1       | 4343 | (+) | NCTATAAAAR      | AAATTAAAAAG      |
| M0025 |            | 0.78736 |      |     |                 |                  |
| 2     | V\$TATA_01 | 4       | 4343 | (+) | STATAAAWRNNNNNN | AAATTAAAAAGACGCT |
| M0025 |            |         |      |     |                 |                  |
| 2     | V\$TATA_01 | 0.77087 | 4344 | (+) | STATAAAWRNNNNNN | AATTAAAAAGACGCTT |
| M0021 |            |         |      |     |                 |                  |
| 6     | V\$TATA_C  | 0.75099 | 4366 | (+) | NCTATAAAAR      | GGAAGAAAAG       |
| M0025 |            | 0.79700 |      |     |                 |                  |
| 2     | V\$TATA_01 | 6       | 4398 | (+) | STATAAAWRNNNNNN | ATTCAAAAGCAGAGA  |
| M0025 |            | 0.80360 |      |     |                 |                  |
| 2     | V\$TATA_01 | 3       | 4935 | (+) | STATAAAWRNNNNNN | TTATATATTTTCAAT  |
| M0021 |            | 0.74306 |      |     |                 |                  |
| 6     | V\$TATA_C  | 8       | 4960 | (+) | NCTATAAAAR      | CTTTTAGAAC       |
| M0021 |            | 0.76419 |      |     |                 |                  |
| 6     | V\$TATA_C  | 3       | 5251 | (+) | NCTATAAAAR      | TCTGTAAAG        |
| M0021 |            |         |      |     |                 |                  |
| 6     | V\$TATA_C  | 0.76921 | 5315 | (+) | NCTATAAAAR      | TTTATACAAC       |
| M0021 |            | 0.93187 |      |     |                 |                  |
| 6     | V\$TATA_C  | 2       | 5359 | (+) | NCTATAAAAR      | GCCATAAAAT       |
| M0025 |            | 0.80030 |      |     |                 |                  |
| 2     | V\$TATA_01 | 4       | 5360 | (+) | STATAAAWRNNNNNN | CCATAAAATAATGAT  |
| M0021 |            | 0.74174 |      |     |                 |                  |
| 6     | V\$TATA_C  | 8       | 5375 | (+) | NCTATAAAAR      | ATCATCAAAT       |
| M0021 |            | 0.77475 |      |     |                 |                  |
| 6     | V\$TATA_C  | 6       | 5391 | (+) | NCTATAAAAR      | TCCATATTAA       |
| M0025 |            | 0.78330 |      |     |                 |                  |
| 2     | V\$TATA_01 | 4       | 5392 | (+) | STATAAAWRNNNNNN | CCATATTAACCTATT  |
| M0021 |            | 0.84869 |      |     |                 |                  |
| 6     | V\$TATA_C  | 3       | 5401 | (+) | NCTATAAAAR      | CCTATTAAAT       |
| M0025 |            | 0.80842 |      |     |                 |                  |
| 2     | V\$TATA_01 | 4       | 5402 | (+) | STATAAAWRNNNNNN | CTATTAAATGTCTTC  |
| M0021 |            | 0.75204 |      |     |                 |                  |
| 6     | V\$TATA_C  | 6       | 5449 | (+) | NCTATAAAAR      | TTCTTTAAAG       |
| M0021 |            | 0.81462 |      |     |                 |                  |
| 6     | V\$TATA_C  | 9       | 5450 | (+) | NCTATAAAAR      | TCTTTAAAGC       |
| M0025 |            | 0.80055 |      |     |                 |                  |
| 2     | V\$TATA_01 | 8       | 5451 | (+) | STATAAAWRNNNNNN | CTTTAAAGCTAAACC  |
| M0025 |            | 0.85409 |      |     |                 |                  |
| 2     | V\$TATA_01 | 8       | 5526 | (+) | STATAAAWRNNNNNN | ATATTTAAACGTACA  |
| M0021 |            | 0.76102 |      |     |                 |                  |
| 6     | V\$TATA_C  | 5       | 5540 | (+) | NCTATAAAAR      | ATTTTTAAAA       |
| M0021 |            | 0.89015 |      |     |                 |                  |
| 6     | V\$TATA_C  | 1       | 5541 | (+) | NCTATAAAAR      | TTTTTAAAAA       |
| M0021 |            | 0.74174 |      |     |                 |                  |
| 6     | V\$TATA_C  | 8       | 5542 | (+) | NCTATAAAAR      | TTTTAAAAAC       |
| M0025 |            | 0.81121 |      |     |                 |                  |
| 2     | V\$TATA_01 | 5       | 5542 | (+) | STATAAAWRNNNNNN | TTTTAAAAACTTCGT  |
| M0025 |            |         |      |     |                 |                  |
| 2     | V\$TATA_01 | 0.78508 | 5562 | (+) | STATAAAWRNNNNNN | ATTTTTATAAACAGC  |
| M0021 |            |         |      |     |                 |                  |
| 6     | V\$TATA_C  | 0.82572 | 5563 | (+) | NCTATAAAAR      | TTTTTATAAA       |
| M0025 |            | 0.82187 |      |     |                 |                  |
| 2     | V\$TATA_01 | 3       | 5564 | (+) | STATAAAWRNNNNNN | TTTTATAAACAGCAT  |
| M0021 |            | 0.79376 |      |     |                 |                  |
| 6     | V\$TATA_C  | 8       | 5565 | (+) | NCTATAAAAR      | TTTATAAACA       |
| M0025 |            | 0.79193 |      |     |                 |                  |
| 2     | V\$TATA_01 | 1       | 5566 | (+) | STATAAAWRNNNNNN | TTATAAACAGCATT   |

|       |            |         |      |     |                 |                  |
|-------|------------|---------|------|-----|-----------------|------------------|
| M0021 |            | 0.81462 |      |     |                 |                  |
| 6     | V\$TATA_C  | 9       | 5604 | (+) | NCTATAAAAR      | ACCAGAAAAT       |
| M0021 |            | 0.81066 |      |     |                 |                  |
| 6     | V\$TATA_C  | 8       | 5619 | (+) | NCTATAAAAR      | AGTTTCAAAG       |
| M0025 |            | 0.81679 |      |     |                 |                  |
| 2     | V\$TATA_01 | 8       | 5669 | (+) | STATAAAWRNNNNNN | GTATATTTTGAGAAG  |
| M0021 |            | 0.76023 |      |     |                 |                  |
| 6     | V\$TATA_C  | 2       | 5685 | (+) | NCTATAAAAR      | ATTATGAAAC       |
| M0021 |            | 0.84578 |      |     |                 |                  |
| 6     | V\$TATA_C  | 8       | 5699 | (+) | NCTATAAAAR      | CACATAAAAA       |
| M0021 |            | 0.76472 |      |     |                 |                  |
| 6     | V\$TATA_C  | 1       | 5700 | (+) | NCTATAAAAR      | ACATAAAAAAG      |
| M0025 |            | 0.82872 |      |     |                 |                  |
| 2     | V\$TATA_01 | 4       | 5700 | (+) | STATAAAWRNNNNNN | ACATAAAAAAGATTTA |
| M0021 |            | 0.75442 |      |     |                 |                  |
| 6     | V\$TATA_C  | 3       | 5709 | (+) | NCTATAAAAR      | GATTTATAAT       |
| M0021 |            | 0.79376 |      |     |                 |                  |
| 6     | V\$TATA_C  | 8       | 5711 | (+) | NCTATAAAAR      | TTTATAATAA       |
| M0021 |            | 0.75891 |      |     |                 |                  |
| 6     | V\$TATA_C  | 2       | 5741 | (+) | NCTATAAAAR      | GTAATATAAA       |
| M0025 |            |         |      |     |                 |                  |
| 2     | V\$TATA_01 | 0.78508 | 5742 | (+) | STATAAAWRNNNNNN | TAATATAAATGTCAG  |
| M0021 |            | 0.75600 |      |     |                 |                  |
| 6     | V\$TATA_C  | 7       | 5743 | (+) | NCTATAAAAR      | AATATAAATG       |
| M0025 |            | 0.90205 |      |     |                 |                  |
| 2     | V\$TATA_01 | 5       | 5744 | (+) | STATAAAWRNNNNNN | ATATAAATGTCAGTG  |
| M0021 |            | 0.77237 |      |     |                 |                  |
| 6     | V\$TATA_C  | 9       | 5790 | (+) | NCTATAAAAR      | ATTTTAAAGG       |
| M0025 |            | 0.78863 |      |     |                 |                  |
| 2     | V\$TATA_01 | 2       | 5791 | (+) | STATAAAWRNNNNNN | TTTTAAAGGTAGAAA  |
| M0025 |            | 0.79776 |      |     |                 |                  |
| 2     | V\$TATA_01 | 7       | 5809 | (+) | STATAAAWRNNNNNN | ATTTTTAAACACATA  |
| M0021 |            | 0.76815 |      |     |                 |                  |
| 6     | V\$TATA_C  | 4       | 5810 | (+) | NCTATAAAAR      | TTTTTAAACA       |
| M0021 |            | 0.80934 |      |     |                 |                  |
| 6     | V\$TATA_C  | 8       | 5836 | (+) | NCTATAAAAR      | AGTATAGAAT       |
| M0021 |            | 0.74438 |      |     |                 |                  |
| 6     | V\$TATA_C  | 9       | 5841 | (+) | NCTATAAAAR      | AGAATAAATA       |
| M0025 |            | 0.89165 |      |     |                 |                  |
| 2     | V\$TATA_01 | 2       | 5842 | (+) | STATAAAWRNNNNNN | GAATAAATACCCAAG  |
| M0021 |            | 0.75627 |      |     |                 |                  |
| 6     | V\$TATA_C  | 1       | 5897 | (+) | NCTATAAAAR      | GTTTTAATAA       |
| M0025 |            | 0.77975 |      |     |                 |                  |
| 2     | V\$TATA_01 | 1       | 5897 | (+) | STATAAAWRNNNNNN | GTTTTAATAAATGCA  |
| M0025 |            | 0.80563 |      |     |                 |                  |
| 2     | V\$TATA_01 | 3       | 5901 | (+) | STATAAAWRNNNNNN | TAATAAATGCATATT  |
| M0021 |            | 0.75151 |      |     |                 |                  |
| 6     | V\$TATA_C  | 8       | 5908 | (+) | NCTATAAAAR      | TGCATATTAG       |
| M0025 |            | 0.80055 |      |     |                 |                  |
| 2     | V\$TATA_01 | 8       | 5911 | (+) | STATAAAWRNNNNNN | ATATTAGTAGGAACA  |
| M0021 |            | 0.77211 |      |     |                 |                  |
| 6     | V\$TATA_C  | 5       | 6029 | (+) | NCTATAAAAR      | GCTGTATAAC       |
| M0025 |            | 0.78888 |      |     |                 |                  |
| 2     | V\$TATA_01 | 6       | 6076 | (+) | STATAAAWRNNNNNN | CTGTAAATTGAGAAT  |
| M0025 |            | 0.78457 |      |     |                 |                  |
| 2     | V\$TATA_01 | 2       | 6093 | (+) | STATAAAWRNNNNNN | TCATAATTACCCAGA  |
| M0025 |            | 0.77670 |      |     |                 |                  |
| 2     | V\$TATA_01 | 6       | 6177 | (+) | STATAAAWRNNNNNN | TTATGAATGTGTGGA  |
| M0021 |            | 0.79007 |      |     |                 |                  |
| 6     | V\$TATA_C  | 1       | 6192 | (+) | NCTATAAAAR      | GTTCTAAAAA       |
| M0021 |            | 0.75204 |      |     |                 |                  |
| 6     | V\$TATA_C  | 6       | 6193 | (+) | NCTATAAAAR      | TTCTAAAAAG       |
| M0021 |            | 0.82677 |      |     |                 |                  |
| 6     | V\$TATA_C  | 6       | 6247 | (+) | NCTATAAAAR      | AGTATACAAA       |
| M0025 |            | 0.80867 |      |     |                 |                  |
| 2     | V\$TATA_01 | 8       | 6248 | (+) | STATAAAWRNNNNNN | GTATACAAATGTGTG  |

|       |            |         |      |     |                  |                  |
|-------|------------|---------|------|-----|------------------|------------------|
| M0025 |            | 0.78736 |      |     |                  |                  |
| 2     | V\$TATA_01 | 4       | 6250 | (+) | STATAAAWRNNNNNNN | ATACAAATGTGTGAC  |
| M0025 |            | 0.80994 |      |     |                  |                  |
| 2     | V\$TATA_01 | 7       | 6277 | (+) | STATAAAWRNNNNNNN | TTATTAATTAGCAGA  |
| M0021 |            | 0.90097 |      |     |                  |                  |
| 6     | V\$TATA_C  | 7       | 6295 | (+) | NCTATAAAAR       | TGCTTAAAAA       |
| M0021 |            | 0.81172 |      |     |                  |                  |
| 6     | V\$TATA_C  | 4       | 6296 | (+) | NCTATAAAAR       | GCTTAAAAAT       |
| M0025 |            | 0.81121 |      |     |                  |                  |
| 2     | V\$TATA_01 | 5       | 6296 | (+) | STATAAAWRNNNNNNN | GCTTAAAAATAAGGA  |
| M0025 |            | 0.77543 |      |     |                  |                  |
| 2     | V\$TATA_01 | 8       | 6298 | (+) | STATAAAWRNNNNNNN | TTAAAAATAAGGATT  |
| M0021 |            | 0.90203 |      |     |                  |                  |
| 6     | V\$TATA_C  | 3       | 6320 | (+) | NCTATAAAAR       | AGCATAAAAAT      |
| M0025 |            | 0.81400 |      |     |                  |                  |
| 2     | V\$TATA_01 | 7       | 6321 | (+) | STATAAAWRNNNNNNN | GCATAAAATTCTTTC  |
| M0025 |            | 0.77036 |      |     |                  |                  |
| 2     | V\$TATA_01 | 3       | 6358 | (+) | STATAAAWRNNNNNNN | ATATTTATCTAATTG  |
| M0025 |            | 0.79776 |      |     |                  |                  |
| 2     | V\$TATA_01 | 7       | 6375 | (+) | STATAAAWRNNNNNNN | ATATTTAAGCTTTCC  |
| M0021 |            | 0.74069 |      |     |                  |                  |
| 6     | V\$TATA_C  | 2       | 6391 | (+) | NCTATAAAAR       | GTTTTAGAAT       |
| M0021 |            | 0.81304 |      |     |                  |                  |
| 6     | V\$TATA_C  | 5       | 6466 | (+) | NCTATAAAAR       | GCCTTTAAAG       |
| M0021 |            | 0.84050 |      |     |                  |                  |
| 6     | V\$TATA_C  | 7       | 6467 | (+) | NCTATAAAAR       | CCTTTAAAGA       |
| M0025 |            | 0.83988 |      |     |                  |                  |
| 2     | V\$TATA_01 | 8       | 6468 | (+) | STATAAAWRNNNNNNN | CTTTAAAGACTCAAG  |
| M0021 |            | 0.75151 |      |     |                  |                  |
| 6     | V\$TATA_C  | 8       | 6542 | (+) | NCTATAAAAR       | TGAATTAAAA       |
| M0021 |            | 0.75574 |      |     |                  |                  |
| 6     | V\$TATA_C  | 3       | 6543 | (+) | NCTATAAAAR       | GAATTAAAAA       |
| M0025 |            |         |      |     |                  |                  |
| 2     | V\$TATA_01 | 0.77696 | 6544 | (+) | STATAAAWRNNNNNNN | AATTAACAAAAACACA |
| M0021 |            | 0.78663 |      |     |                  |                  |
| 6     | V\$TATA_C  | 9       | 6545 | (+) | NCTATAAAAR       | ATTAAAAAAA       |
| M0025 |            | 0.79446 |      |     |                  |                  |
| 2     | V\$TATA_01 | 8       | 6546 | (+) | STATAAAWRNNNNNNN | TTAAAAAACACATA   |
| M0025 |            | 0.80334 |      |     |                  |                  |
| 2     | V\$TATA_01 | 9       | 6558 | (+) | STATAAAWRNNNNNNN | ATATTAAGACTTAGT  |
| M0021 |            | 0.83918 |      |     |                  |                  |
| 6     | V\$TATA_C  | 7       | 6574 | (+) | NCTATAAAAR       | TCCATTAAAA       |
| M0021 |            | 0.85555 |      |     |                  |                  |
| 6     | V\$TATA_C  | 8       | 6575 | (+) | NCTATAAAAR       | CCATTAAAC        |
| M0025 |            | 0.83100 |      |     |                  |                  |
| 2     | V\$TATA_01 | 7       | 6575 | (+) | STATAAAWRNNNNNNN | CCATTAAACAAACA   |
| M0021 |            | 0.78082 |      |     |                  |                  |
| 6     | V\$TATA_C  | 9       | 6608 | (+) | NCTATAAAAR       | ACTTTTTAAG       |
| M0021 |            | 0.77660 |      |     |                  |                  |
| 6     | V\$TATA_C  | 4       | 6618 | (+) | NCTATAAAAR       | TCTTTTTAAA       |
| M0021 |            | 0.76762 |      |     |                  |                  |
| 6     | V\$TATA_C  | 6       | 6619 | (+) | NCTATAAAAR       | CTTTTTAAAA       |
| M0021 |            | 0.87272 |      |     |                  |                  |
| 6     | V\$TATA_C  | 2       | 6620 | (+) | NCTATAAAAR       | TTTTTAAAT        |
| M0025 |            | 0.77772 |      |     |                  |                  |
| 2     | V\$TATA_01 | 1       | 6620 | (+) | STATAAAWRNNNNNNN | TTTTTAAATAGATC   |
| M0025 |            | 0.77416 |      |     |                  |                  |
| 2     | V\$TATA_01 | 9       | 6621 | (+) | STATAAAWRNNNNNNN | TTTTTAAATAGATCT  |
| M0025 |            | 0.80055 |      |     |                  |                  |
| 2     | V\$TATA_01 | 8       | 6643 | (+) | STATAAAWRNNNNNNN | TTATATGAAATCAGT  |
| M0021 |            | 0.80644 |      |     |                  |                  |
| 6     | V\$TATA_C  | 3       | 6892 | (+) | NCTATAAAAR       | TGTTTTAAAA       |
| M0021 |            | 0.87826 |      |     |                  |                  |
| 6     | V\$TATA_C  | 8       | 6893 | (+) | NCTATAAAAR       | GTTTTAAAAA       |
| M0025 |            |         |      |     |                  |                  |
| 2     | V\$TATA_01 | 0.81629 | 6893 | (+) | STATAAAWRNNNNNNN | GTTTTAAAAAGAGGA  |

|       |            |         |      |     |                 |                 |
|-------|------------|---------|------|-----|-----------------|-----------------|
| M0021 |            | 0.77950 |      |     |                 |                 |
| 6     | V\$TATA_C  | 9       | 6894 | (+) | NCTATAAAAR      | TTTTAAAAAG      |
| M0025 |            | 0.85460 |      |     |                 |                 |
| 2     | V\$TATA_01 | 5       | 6894 | (+) | STATAAAWRNNNNNN | TTTTAAAAAGAGGAG |
| M0021 |            | 0.75917 |      |     |                 |                 |
| 6     | V\$TATA_C  | 6       | 6917 | (+) | NCTATAAAAR      | ATCATAAATA      |
| M0025 |            | 0.83024 |      |     |                 |                 |
| 2     | V\$TATA_01 | 6       | 6918 | (+) | STATAAAWRNNNNNN | TCATAAATAACAATT |
| M0021 |            | 0.81594 |      |     |                 |                 |
| 6     | V\$TATA_C  | 9       | 6987 | (+) | NCTATAAAAR      | AGGATAAAAT      |
| M0025 |            | 0.84927 |      |     |                 |                 |
| 2     | V\$TATA_01 | 7       | 6988 | (+) | STATAAAWRNNNNNN | GGATAAAATCCACCC |
| M0021 |            | 0.81225 |      |     |                 |                 |
| 6     | V\$TATA_C  | 2       | 7060 | (+) | NCTATAAAAR      | CCCACAAAAC      |
| M0021 |            | 0.81779 |      |     |                 |                 |
| 6     | V\$TATA_C  | 8       | 7237 | (+) | NCTATAAAAR      | TGTTGAAAAG      |
| M0021 |            | 0.86612 |      |     |                 |                 |
| 6     | V\$TATA_C  | 1       | 7538 | (+) | NCTATAAAAR      | CCTACAAAAA      |
| M0025 |            | 0.79624 |      |     |                 |                 |
| 2     | V\$TATA_01 | 5       | 7539 | (+) | STATAAAWRNNNNNN | CTACAAAAAATCAA  |
| M0021 |            | 0.76155 |      |     |                 |                 |
| 6     | V\$TATA_C  | 3       | 7541 | (+) | NCTATAAAAR      | ACAAAAAAAT      |
| M0021 |            | 0.78188 |      |     |                 |                 |
| 6     | V\$TATA_C  | 5       | 7606 | (+) | NCTATAAAAR      | GTTATAAATA      |
| M0025 |            | 0.85841 |      |     |                 |                 |
| 2     | V\$TATA_01 | 2       | 7607 | (+) | STATAAAWRNNNNNN | TTATAAATAGAATAA |
| M0025 |            |         |      |     |                 |                 |
| 2     | V\$TATA_01 | 0.79726 | 7704 | (+) | STATAAAWRNNNNNN | CTATGTAGAAGAAGC |
| M0021 |            | 0.75257 |      |     |                 |                 |
| 6     | V\$TATA_C  | 5       | 7793 | (+) | NCTATAAAAR      | ACAATAAAGC      |
| M0025 |            | 0.79954 |      |     |                 |                 |
| 2     | V\$TATA_01 | 3       | 7794 | (+) | STATAAAWRNNNNNN | CAATAAAGCCAGAAT |
| M0021 |            | 0.75204 |      |     |                 |                 |
| 6     | V\$TATA_C  | 6       | 7812 | (+) | NCTATAAAAR      | ACTTGATAAT      |
| M0021 |            | 0.74438 |      |     |                 |                 |
| 6     | V\$TATA_C  | 9       | 7834 | (+) | NCTATAAAAR      | AGAATAACAA      |
| M0025 |            | 0.80842 |      |     |                 |                 |
| 2     | V\$TATA_01 | 4       | 7932 | (+) | STATAAAWRNNNNNN | TGATATATGAGCATA |
| M0025 |            | 0.84420 |      |     |                 |                 |
| 2     | V\$TATA_01 | 2       | 7934 | (+) | STATAAAWRNNNNNN | ATATATGAGCATATG |
| M0021 |            | 0.74438 |      |     |                 |                 |
| 6     | V\$TATA_C  | 9       | 7941 | (+) | NCTATAAAAR      | AGCATATGAG      |
| M0025 |            | 0.82923 |      |     |                 |                 |
| 2     | V\$TATA_01 | 1       | 7942 | (+) | STATAAAWRNNNNNN | GCATATGAGGGCAAA |
| M0025 |            | 0.79167 |      |     |                 |                 |
| 2     | V\$TATA_01 | 7       | 8170 | (+) | STATAAAWRNNNNNN | GGATAAGACCCAATA |
| M0021 |            | 0.79746 |      |     |                 |                 |
| 6     | V\$TATA_C  | 5       | 8208 | (+) | NCTATAAAAR      | AGCATAAAGA      |
| M0025 |            | 0.79573 |      |     |                 |                 |
| 2     | V\$TATA_01 | 7       | 8209 | (+) | STATAAAWRNNNNNN | GCATAAAGATTAGTT |
| M0021 |            | 0.78188 |      |     |                 |                 |
| 6     | V\$TATA_C  | 5       | 8220 | (+) | NCTATAAAAR      | AGTTTTAAAT      |
| M0025 |            | 0.77213 |      |     |                 |                 |
| 2     | V\$TATA_01 | 9       | 8301 | (+) | STATAAAWRNNNNNN | CTGTATATATATGGT |
| M0021 |            | 0.76762 |      |     |                 |                 |
| 6     | V\$TATA_C  | 6       | 8302 | (+) | NCTATAAAAR      | TGTATATATA      |
| M0025 |            | 0.90586 |      |     |                 |                 |
| 2     | V\$TATA_01 | 1       | 8303 | (+) | STATAAAWRNNNNNN | GTATATATATGGTGT |
| M0025 |            | 0.87338 |      |     |                 |                 |
| 2     | V\$TATA_01 | 2       | 8305 | (+) | STATAAAWRNNNNNN | ATATATATGGTGTTG |
| M0025 |            | 0.78609 |      |     |                 |                 |
| 2     | V\$TATA_01 | 5       | 8375 | (+) | STATAAAWRNNNNNN | ATTTATAGAAAAAAC |
| M0021 |            | 0.79561 |      |     |                 |                 |
| 6     | V\$TATA_C  | 7       | 8376 | (+) | NCTATAAAAR      | TTTATAGAAA      |
| M0021 |            | 0.75178 |      |     |                 |                 |
| 6     | V\$TATA_C  | 2       | 8378 | (+) | NCTATAAAAR      | TATAGAAAAA      |

|       |            |         |      |     |                  |                  |
|-------|------------|---------|------|-----|------------------|------------------|
| M0025 |            | 0.78482 |      |     |                  |                  |
| 2     | V\$TATA_01 | 6       | 8411 | (+) | STATAAAWRNNNNNNN | TTATGTAAACCTGTT  |
| M0021 |            | 0.76102 |      |     |                  |                  |
| 6     | V\$TATA_C  | 5       | 8433 | (+) | NCTATAAAAR       | ATTTTAAAGA       |
| M0025 |            | 0.80182 |      |     |                  |                  |
| 2     | V\$TATA_01 | 7       | 8434 | (+) | STATAAAWRNNNNNNN | TTTTAAAGATCAACT  |
| M0021 |            | 0.80274 |      |     |                  |                  |
| 6     | V\$TATA_C  | 6       | 8497 | (+) | NCTATAAAAR       | CACTTAAAT        |
| M0025 |            | 0.78178 |      |     |                  |                  |
| 2     | V\$TATA_01 | 1       | 8505 | (+) | STATAAAWRNNNNNNN | ATTTATATATTGTCT  |
| M0025 |            | 0.80436 |      |     |                  |                  |
| 2     | V\$TATA_01 | 4       | 8507 | (+) | STATAAAWRNNNNNNN | TTATATATTGTCTTT  |
| M0021 |            | 0.82017 |      |     |                  |                  |
| 6     | V\$TATA_C  | 4       | 8563 | (+) | NCTATAAAAR       | GACTTAAAG        |
| M0025 |            | 0.82745 |      |     |                  |                  |
| 2     | V\$TATA_01 | 5       | 8564 | (+) | STATAAAWRNNNNNNN | ACTTAAAGGGGAAT   |
| M0021 |            | 0.74069 |      |     |                  |                  |
| 6     | V\$TATA_C  | 2       | 8596 | (+) | NCTATAAAAR       | TTCTTAAAGA       |
| M0021 |            | 0.76102 |      |     |                  |                  |
| 6     | V\$TATA_C  | 5       | 8639 | (+) | NCTATAAAAR       | ATTTTAATAA       |
| M0021 |            |         |      |     |                  |                  |
| 6     | V\$TATA_C  | 0.80882 | 8642 | (+) | NCTATAAAAR       | TTAATAAAAC       |
| M0021 |            | 0.79931 |      |     |                  |                  |
| 6     | V\$TATA_C  | 3       | 8687 | (+) | NCTATAAAAR       | TTTTTATAAC       |
| M0021 |            | 0.82307 |      |     |                  |                  |
| 6     | V\$TATA_C  | 9       | 8696 | (+) | NCTATAAAAR       | CCTTTAAGAT       |
| M0021 |            | 0.79376 |      |     |                  |                  |
| 6     | V\$TATA_C  | 8       | 8741 | (+) | NCTATAAAAR       | TTTATGAAAA       |
| M0025 |            | 0.77061 |      |     |                  |                  |
| 2     | V\$TATA_01 | 7       | 8742 | (+) | STATAAAWRNNNNNNN | TTATGAAAAAGTCAC  |
| M0021 |            | 0.76445 |      |     |                  |                  |
| 6     | V\$TATA_C  | 7       | 8787 | (+) | NCTATAAAAR       | GTTATAACAT       |
| M0021 |            |         |      |     |                  |                  |
| 6     | V\$TATA_C  | 0.74835 | 8792 | (+) | NCTATAAAAR       | AACATATAAC       |
| M0025 |            | 0.82720 |      |     |                  |                  |
| 2     | V\$TATA_01 | 1       | 8793 | (+) | STATAAAWRNNNNNNN | ACATATAACTGAATG  |
| M0021 |            | 0.74359 |      |     |                  |                  |
| 6     | V\$TATA_C  | 7       | 8890 | (+) | NCTATAAAAR       | ATTTTTAAAT       |
| M0021 |            | 0.77950 |      |     |                  |                  |
| 6     | V\$TATA_C  | 9       | 8891 | (+) | NCTATAAAAR       | TTTTTAAATG       |
| M0025 |            | 0.81375 |      |     |                  |                  |
| 2     | V\$TATA_01 | 3       | 8892 | (+) | STATAAAWRNNNNNNN | TTTTAAATGAGTATA  |
| M0025 |            | 0.79776 |      |     |                  |                  |
| 2     | V\$TATA_01 | 7       | 8902 | (+) | STATAAAWRNNNNNNN | GTATACATGGAACAA  |
| M0021 |            | 0.75019 |      |     |                  |                  |
| 6     | V\$TATA_C  | 8       | 8982 | (+) | NCTATAAAAR       | ACCATATACT       |
| M0021 |            | 0.83390 |      |     |                  |                  |
| 6     | V\$TATA_C  | 5       | 8989 | (+) | NCTATAAAAR       | ACTTTCAAAA       |
| M0021 |            | 0.75019 |      |     |                  |                  |
| 6     | V\$TATA_C  | 8       | 8990 | (+) | NCTATAAAAR       | CTTTCAAAAT       |
| M0021 |            | 0.93081 |      |     |                  |                  |
| 6     | V\$TATA_C  | 6       | 9014 | (+) | NCTATAAAAR       | AGCATAAAAAG      |
| M0025 |            | 0.87084 |      |     |                  |                  |
| 2     | V\$TATA_01 | 5       | 9015 | (+) | STATAAAWRNNNNNNN | GCATAAAAGTTCAGT  |
| M0021 |            | 0.75125 |      |     |                  |                  |
| 6     | V\$TATA_C  | 4       | 9052 | (+) | NCTATAAAAR       | CATATCAAAA       |
| M0025 |            | 0.77645 |      |     |                  |                  |
| 2     | V\$TATA_01 | 3       | 9061 | (+) | STATAAAWRNNNNNNN | ATATGTATAAAAAATA |
| M0021 |            | 0.95405 |      |     |                  |                  |
| 6     | V\$TATA_C  | 3       | 9064 | (+) | NCTATAAAAR       | TGTATAAAAA       |
| M0025 |            | 0.89114 |      |     |                  |                  |
| 2     | V\$TATA_01 | 4       | 9065 | (+) | STATAAAWRNNNNNNN | GTATAAAAAATAATTT |
| M0021 |            | 0.84103 |      |     |                  |                  |
| 6     | V\$TATA_C  | 5       | 9100 | (+) | NCTATAAAAR       | TCTTTAAGAA       |
| M0025 |            | 0.79294 |      |     |                  |                  |
| 2     | V\$TATA_01 | 6       | 9101 | (+) | STATAAAWRNNNNNNN | CTTTAAGAATCTATT  |



|       |             |         |      |     |                 |                  |
|-------|-------------|---------|------|-----|-----------------|------------------|
| M0021 |             | 0.76868 |      |     |                 |                  |
| 6     | V\$TATA_C   | 2       | 9131 | (+) | NCTATAAAAR      | TCAATAAATT       |
| M0025 |             | 0.79421 |      |     |                 |                  |
| 2     | V\$TATA_01  | 5       | 9132 | (+) | STATAAAWRNNNNNN | CAATAAATTAACCCCT |
| M0012 |             | 0.78466 |      |     |                 |                  |
| 7     | V\$GATA1_03 | 4       | 43   | (+) | RNSNNGATAANNGN  | AAAAAGGTAAGAAT   |
| M0007 |             | 0.84550 |      |     |                 |                  |
| 5     | V\$GATA1_01 | 8       | 51   | (-) | SNNGATNNNN      | AAGAATCTCA       |
| M0007 |             | 0.84934 |      |     |                 |                  |
| 6     | V\$GATA2_01 | 6       | 51   | (-) | NNNGATRNNN      | AAGAATCTCA       |
| M0007 |             | 0.83265 |      |     |                 |                  |
| 6     | V\$GATA2_01 | 7       | 58   | (+) | NNNGATRNNN      | TCAGATATAA       |
| M0007 |             | 0.84093 |      |     |                 |                  |
| 7     | V\$GATA3_01 | 9       | 59   | (+) | NNGATARNG       | CAGATATAA        |
| M0020 |             | 0.83379 |      |     |                 |                  |
| 3     | V\$GATA_C   | 9       | 60   | (+) | NGATAAGNMNN     | AGATATAATTT      |
| M0012 |             | 0.79906 |      |     |                 |                  |
| 6     | V\$GATA1_02 | 3       | 71   | (-) | NNNNNGATANKGNN  | CAGTGTATCTGCTA   |
| M0012 |             | 0.81678 |      |     |                 |                  |
| 8     | V\$GATA1_04 | 9       | 71   | (-) | NNCWGATARNNNN   | CAGTGTATCTGCT    |
| M0007 |             | 0.86327 |      |     |                 |                  |
| 5     | V\$GATA1_01 | 7       | 73   | (-) | SNNGATNNNN      | GTGTATCTGC       |
| M0007 |             | 0.88452 |      |     |                 |                  |
| 6     | V\$GATA2_01 | 9       | 73   | (-) | NNNGATRNNN      | GTGTATCTGC       |
| M0012 |             | 0.80769 |      |     |                 |                  |
| 7     | V\$GATA1_03 | 2       | 82   | (-) | RNSNNGATAANNGN  | CTACTCATCTTTAT   |
| M0007 |             | 0.80503 |      |     |                 |                  |
| 5     | V\$GATA1_01 | 5       | 84   | (-) | SNNGATNNNN      | ACTCATCTTT       |
| M0007 |             | 0.82498 |      |     |                 |                  |
| 6     | V\$GATA2_01 | 9       | 84   | (-) | NNNGATRNNN      | ACTCATCTTT       |
| M0007 |             |         |      |     |                 |                  |
| 7     | V\$GATA3_01 | 0.83385 | 84   | (-) | NNGATARNG       | ACTCATCTT        |
| M0012 |             | 0.83782 |      |     |                 |                  |
| 7     | V\$GATA1_03 | 5       | 119  | (+) | RNSNNGATAANNGN  | AAGAATATAATTGC   |
| M0007 |             | 0.78980 |      |     |                 |                  |
| 6     | V\$GATA2_01 | 6       | 138  | (-) | NNNGATRNNN      | ATAGATCTTA       |
| M0012 |             |         |      |     |                 |                  |
| 6     | V\$GATA1_02 | 0.83875 | 145  | (+) | NNNNNGATANKGNN  | TTAAAAATAAGGGT   |
| M0012 |             | 0.91406 |      |     |                 |                  |
| 6     | V\$GATA1_02 | 2       | 160  | (+) | NNNNNGATANKGNN  | TTTAAGATAAGGTT   |
| M0012 |             | 0.91911 |      |     |                 |                  |
| 8     | V\$GATA1_04 | 8       | 161  | (+) | NNCWGATARNNNN   | TTAAGATAAGGTT    |
| M0007 |             | 0.82477 |      |     |                 |                  |
| 5     | V\$GATA1_01 | 8       | 162  | (+) | SNNGATNNNN      | TAAGATAAGG       |
| M0007 |             | 0.89896 |      |     |                 |                  |
| 6     | V\$GATA2_01 | 3       | 162  | (+) | NNNGATRNNN      | TAAGATAAGG       |
| M0007 |             | 0.95436 |      |     |                 |                  |
| 7     | V\$GATA3_01 | 4       | 163  | (+) | NNGATARNG       | AAGATAAGG        |
| M0020 |             | 0.93942 |      |     |                 |                  |
| 3     | V\$GATA_C   | 2       | 164  | (+) | NGATAAGNMNN     | AGATAAGGTTT      |
| M0007 |             | 0.78664 |      |     |                 |                  |
| 6     | V\$GATA2_01 | 9       | 189  | (-) | NNNGATRNNN      | AAATATGTTA       |
| M0012 |             | 0.78368 |      |     |                 |                  |
| 7     | V\$GATA1_03 | 4       | 209  | (-) | RNSNNGATAANNGN  | GTGACTATAAAGAT   |
| M0007 |             | 0.85378 |      |     |                 |                  |
| 7     | V\$GATA3_01 | 8       | 218  | (+) | NNGATARNG       | AAGATTTGA        |
| M0012 |             | 0.78468 |      |     |                 |                  |
| 6     | V\$GATA1_02 | 7       | 220  | (+) | NNNNNGATANKGNN  | GATTTGATAAAAAAT  |
| M0012 |             | 0.88878 |      |     |                 |                  |
| 8     | V\$GATA1_04 | 7       | 221  | (+) | NNCWGATARNNNN   | ATTTGATAAAAAAT   |
| M0007 |             | 0.83074 |      |     |                 |                  |
| 7     | V\$GATA3_01 | 9       | 223  | (+) | NNGATARNG       | TTGATAAAA        |
| M0020 |             |         |      |     |                 |                  |
| 3     | V\$GATA_C   | 0.93383 | 224  | (+) | NGATAAGNMNN     | TGATAAAAAATT     |
| M0012 |             | 0.85276 |      |     |                 |                  |
| 7     | V\$GATA1_03 | 8       | 255  | (+) | RNSNNGATAANNGN  | AGGAATATAATAAG   |

|       |             |         |     |     |                |                |
|-------|-------------|---------|-----|-----|----------------|----------------|
| M0007 |             | 0.79121 |     |     |                |                |
| 5     | V\$GATA1_01 | 4       | 265 | (+) | SNNGATNNNN     | TAAGATGTAG     |
| M0007 |             | 0.83897 |     |     |                |                |
| 6     | V\$GATA2_01 | 2       | 265 | (+) | NNNGATRNNN     | TAAGATGTAG     |
| M0007 |             |         |     |     |                |                |
| 7     | V\$GATA3_01 | 0.82809 | 266 | (+) | NNGATARNG      | AAGATGTAG      |
| M0012 |             | 0.81014 |     |     |                |                |
| 7     | V\$GATA1_03 | 2       | 283 | (-) | RNSNNGATAANNGN | GTTGCTATTTCTT  |
| M0012 |             |         |     |     |                |                |
| 6     | V\$GATA1_02 | 0.7775  | 286 | (-) | NNNNNGATANKGNN | GCTATTTTCTTTAA |
| M0012 |             | 0.78417 |     |     |                |                |
| 7     | V\$GATA1_03 | 4       | 305 | (+) | RNSNNGATAANNGN | GACTAGTTAACAAG |
| M0012 |             | 0.80769 |     |     |                |                |
| 7     | V\$GATA1_03 | 2       | 307 | (-) | RNSNNGATAANNGN | CTAGTTAACAAGCT |
| M0007 |             | 0.79747 |     |     |                |                |
| 6     | V\$GATA2_01 | 4       | 327 | (+) | NNNGATRNNN     | AAAGATCTTT     |
| M0007 |             | 0.79747 |     |     |                |                |
| 6     | V\$GATA2_01 | 4       | 327 | (-) | NNNGATRNNN     | AAAGATCTTT     |
| M0007 |             | 0.80739 |     |     |                |                |
| 6     | V\$GATA2_01 | 7       | 404 | (-) | NNNGATRNNN     | TACTATGGGG     |
| M0007 |             | 0.85291 |     |     |                |                |
| 5     | V\$GATA1_01 | 2       | 410 | (+) | SNNGATNNNN     | GGGGATTGA      |
| M0007 |             | 0.84348 |     |     |                |                |
| 6     | V\$GATA2_01 | 2       | 410 | (+) | NNNGATRNNN     | GGGGATTGA      |
| M0007 |             | 0.82587 |     |     |                |                |
| 7     | V\$GATA3_01 | 5       | 411 | (+) | NNGATARNG      | GGGATTGA       |
| M0007 |             | 0.82428 |     |     |                |                |
| 5     | V\$GATA1_01 | 4       | 432 | (+) | SNNGATNNNN     | GAAGATCTCT     |
| M0007 |             | 0.77344 |     |     |                |                |
| 5     | V\$GATA1_01 | 5       | 432 | (-) | SNNGATNNNN     | GAAGATCTCT     |
| M0007 |             | 0.86332 |     |     |                |                |
| 6     | V\$GATA2_01 | 9       | 432 | (+) | NNNGATRNNN     | GAAGATCTCT     |
| M0007 |             | 0.80198 |     |     |                |                |
| 6     | V\$GATA2_01 | 5       | 432 | (-) | NNNGATRNNN     | GAAGATCTCT     |
| M0007 |             | 0.80108 |     |     |                |                |
| 6     | V\$GATA2_01 | 3       | 464 | (+) | NNNGATRNNN     | TAGCATATTT     |
| M0012 |             | 0.83687 |     |     |                |                |
| 6     | V\$GATA1_02 | 5       | 477 | (+) | NNNNNGATANKGNN | CAAGAGATAAAGAG |
| M0012 |             | 0.84933 |     |     |                |                |
| 7     | V\$GATA1_03 | 9       | 477 | (+) | RNSNNGATAANNGN | CAAGAGATAAAGAG |
| M0012 |             | 0.93259 |     |     |                |                |
| 8     | V\$GATA1_04 | 8       | 478 | (+) | NNCWGATARNNNN  | AAGAGATAAAGAG  |
| M0007 |             | 0.79318 |     |     |                |                |
| 5     | V\$GATA1_01 | 9       | 479 | (+) | SNNGATNNNN     | AGAGATAAAG     |
| M0007 |             | 0.82814 |     |     |                |                |
| 6     | V\$GATA2_01 | 6       | 479 | (+) | NNNGATRNNN     | AGAGATAAAG     |
| M0007 |             | 0.93088 |     |     |                |                |
| 7     | V\$GATA3_01 | 2       | 480 | (+) | NNGATARNG      | GAGATAAAG      |
| M0020 |             | 0.86424 |     |     |                |                |
| 3     | V\$GATA_C   | 4       | 481 | (+) | NGATAAGNMNN    | AGATAAAGAGG    |
| M0007 |             |         |     |     |                |                |
| 5     | V\$GATA1_01 | 0.77542 | 497 | (+) | SNNGATNNNN     | TAGGATATAT     |
| M0007 |             | 0.86874 |     |     |                |                |
| 6     | V\$GATA2_01 | 2       | 497 | (+) | NNNGATRNNN     | TAGGATATAT     |
| M0020 |             | 0.92948 |     |     |                |                |
| 3     | V\$GATA_C   | 1       | 539 | (-) | NGATAAGNMNN    | TATATTTATCA    |
| M0012 |             |         |     |     |                |                |
| 7     | V\$GATA1_03 | 0.78001 | 540 | (-) | RNSNNGATAANNGN | ATATTTATCAAAAT |
| M0012 |             |         |     |     |                |                |
| 8     | V\$GATA1_04 | 0.87163 | 540 | (-) | NNCWGATARNNNN  | ATATTTATCAAAA  |
| M0007 |             | 0.79521 |     |     |                |                |
| 6     | V\$GATA2_01 | 9       | 560 | (-) | NNNGATRNNN     | GAACATCCAA     |
| M0020 |             | 0.84808 |     |     |                |                |
| 3     | V\$GATA_C   | 9       | 574 | (-) | NGATAAGNMNN    | CAAGTTTATCA    |
| M0012 |             | 0.83312 |     |     |                |                |
| 6     | V\$GATA1_02 | 5       | 575 | (-) | NNNNNGATANKGNN | AAGTTTATCATTTA |

|       |             |         |      |     |                |                |
|-------|-------------|---------|------|-----|----------------|----------------|
| M0012 |             | 0.86366 |      |     |                |                |
| 8     | V\$GATA1_04 | 4       | 575  | (-) | NNCWGATARNNNN  | AAGTTTATCATTT  |
| M0007 |             | 0.79206 |      |     |                |                |
| 6     | V\$GATA2_01 | 1       | 577  | (-) | NNNGATRNNN     | GTTTATCATT     |
| M0007 |             | 0.82321 |      |     |                |                |
| 7     | V\$GATA3_01 | 7       | 577  | (-) | NNGATARNG      | GTTTATCAT      |
| M0020 |             | 0.92233 |      |     |                |                |
| 3     | V\$GATA_C   | 6       | 581  | (-) | NGATAAGNMNN    | ATCATTTATCT    |
| M0012 |             | 0.82562 |      |     |                |                |
| 6     | V\$GATA1_02 | 5       | 582  | (-) | NNNNNGATANKGNN | TCATTTATCTTATA |
| M0012 |             | 0.91850 |      |     |                |                |
| 8     | V\$GATA1_04 | 5       | 582  | (-) | NNCWGATARNNNN  | TCATTTATCTTAT  |
| M0007 |             | 0.83942 |      |     |                |                |
| 6     | V\$GATA2_01 | 3       | 584  | (-) | NNNGATRNNN     | ATTTATCTTA     |
| M0007 |             | 0.84669 |      |     |                |                |
| 7     | V\$GATA3_01 | 9       | 584  | (-) | NNGATARNG      | ATTTATCTT      |
| M0012 |             | 0.83406 |      |     |                |                |
| 6     | V\$GATA1_02 | 3       | 613  | (+) | NNNNNGATANKGNN | AAATAGATACATGA |
| M0012 |             | 0.81234 |      |     |                |                |
| 7     | V\$GATA1_03 | 7       | 613  | (+) | RNSNNGATAANNGN | AAATAGATACATGA |
| M0020 |             | 0.85585 |      |     |                |                |
| 3     | V\$GATA_C   | 6       | 617  | (+) | NGATAAGNMNN    | AGATACATGAA    |
| M0012 |             | 0.79495 |      |     |                |                |
| 7     | V\$GATA1_03 | 3       | 818  | (-) | RNSNNGATAANNGN | AATAATATCCTCCC |
| M0007 |             | 0.83563 |      |     |                |                |
| 5     | V\$GATA1_01 | 7       | 820  | (-) | SNNGATNNNN     | TAATATCCTC     |
| M0007 |             |         |      |     |                |                |
| 6     | V\$GATA2_01 | 0.89355 | 820  | (-) | NNNGATRNNN     | TAATATCCTC     |
| M0007 |             | 0.82144 |      |     |                |                |
| 7     | V\$GATA3_01 | 4       | 820  | (-) | NNGATARNG      | TAATATCCT      |
| M0012 |             | 0.79201 |      |     |                |                |
| 7     | V\$GATA1_03 | 4       | 850  | (-) | RNSNNGATAANNGN | GGTATTATGCTCTT |
| M0007 |             | 0.88005 |      |     |                |                |
| 5     | V\$GATA1_01 | 9       | 904  | (-) | SNNGATNNNN     | AGACATCTTG     |
| M0007 |             | 0.89400 |      |     |                |                |
| 6     | V\$GATA2_01 | 1       | 904  | (-) | NNNGATRNNN     | AGACATCTTG     |
| M0007 |             |         |      |     |                |                |
| 5     | V\$GATA1_01 | 0.86229 | 982  | (-) | SNNGATNNNN     | GAAAATCTGG     |
| M0007 |             | 0.84348 |      |     |                |                |
| 6     | V\$GATA2_01 | 2       | 982  | (-) | NNNGATRNNN     | GAAAATCTGG     |
| M0007 |             | 0.79170 |      |     |                |                |
| 5     | V\$GATA1_01 | 8       | 989  | (+) | SNNGATNNNN     | TGGGATTGAA     |
| M0007 |             | 0.81912 |      |     |                |                |
| 6     | V\$GATA2_01 | 5       | 989  | (+) | NNNGATRNNN     | TGGGATTGAA     |
| M0007 |             |         |      |     |                |                |
| 7     | V\$GATA3_01 | 0.84537 | 990  | (+) | NNGATARNG      | GGGATTGAA      |
| M0007 |             | 0.88795 |      |     |                |                |
| 5     | V\$GATA1_01 | 7       | 996  | (+) | SNNGATNNNN     | GAAGATGTGT     |
| M0007 |             | 0.88678 |      |     |                |                |
| 6     | V\$GATA2_01 | 4       | 996  | (+) | NNNGATRNNN     | GAAGATGTGT     |
| M0007 |             | 0.85093 |      |     |                |                |
| 5     | V\$GATA1_01 | 8       | 1010 | (+) | SNNGATNNNN     | AGAGATGTTG     |
| M0007 |             | 0.85475 |      |     |                |                |
| 6     | V\$GATA2_01 | 9       | 1010 | (+) | NNNGATRNNN     | AGAGATGTTG     |
| M0007 |             | 0.86530 |      |     |                |                |
| 7     | V\$GATA3_01 | 8       | 1011 | (+) | NNGATARNG      | GAGATGTTG      |
| M0007 |             | 0.80700 |      |     |                |                |
| 5     | V\$GATA1_01 | 9       | 1013 | (+) | SNNGATNNNN     | GATGTTGGTG     |
| M0007 |             | 0.78331 |      |     |                |                |
| 5     | V\$GATA1_01 | 7       | 1090 | (-) | SNNGATNNNN     | CAAAATCAAT     |
| M0007 |             | 0.82011 |      |     |                |                |
| 7     | V\$GATA3_01 | 5       | 1090 | (-) | NNGATARNG      | CAAAATCAA      |
| M0007 |             | 0.77393 |      |     |                |                |
| 5     | V\$GATA1_01 | 9       | 1142 | (+) | SNNGATNNNN     | GGGGACTGGG     |
| M0012 |             | 0.83687 |      |     |                |                |
| 6     | V\$GATA1_02 | 5       | 1181 | (+) | NNNNNGATANKGNN | CAAGAGATAAGTAC |

|       |             |         |      |     |                 |                 |
|-------|-------------|---------|------|-----|-----------------|-----------------|
| M0012 |             | 0.87187 |      |     |                 |                 |
| 7     | V\$GATA1_03 | 7       | 1181 | (+) | RNSNNGATAAANNGN | CAAGAGATAAGTAC  |
| M0012 |             | 0.93627 |      |     |                 |                 |
| 8     | V\$GATA1_04 | 5       | 1182 | (+) | NNCWGATARNNNN   | AAGAGATAAGTAC   |
| M0007 |             | 0.83366 |      |     |                 |                 |
| 5     | V\$GATA1_01 | 2       | 1183 | (+) | SNNGATNNNN      | AGAGATAAGT      |
| M0007 |             | 0.86152 |      |     |                 |                 |
| 6     | V\$GATA2_01 | 5       | 1183 | (+) | NNNGATRNNN      | AGAGATAAGT      |
| M0007 |             | 0.90474 |      |     |                 |                 |
| 7     | V\$GATA3_01 | 1       | 1184 | (+) | NNGATARNG       | GAGATAAGT       |
| M0020 |             | 0.98384 |      |     |                 |                 |
| 3     | V\$GATA_C   | 6       | 1185 | (+) | NGATAAGNMNN     | AGATAAGTACA     |
| M0012 |             | 0.79348 |      |     |                 |                 |
| 7     | V\$GATA1_03 | 4       | 1205 | (+) | RNSNNGATAAANNGN | GTAGAGAAAATAAG  |
| M0012 |             | 0.80769 |      |     |                 |                 |
| 7     | V\$GATA1_03 | 2       | 1208 | (+) | RNSNNGATAAANNGN | GAGAAAATAAGCAT  |
| M0007 |             | 0.81822 |      |     |                 |                 |
| 6     | V\$GATA2_01 | 3       | 1216 | (+) | NNNGATRNNN      | AAGCATAGTG      |
| M0007 |             | 0.78874 |      |     |                 |                 |
| 5     | V\$GATA1_01 | 6       | 1226 | (+) | SNNGATNNNN      | TATGATCTCT      |
| M0007 |             | 0.83761 |      |     |                 |                 |
| 6     | V\$GATA2_01 | 8       | 1226 | (+) | NNNGATRNNN      | TATGATCTCT      |
| M0007 |             | 0.78578 |      |     |                 |                 |
| 5     | V\$GATA1_01 | 5       | 1256 | (+) | SNNGATNNNN      | AGAGATGACA      |
| M0007 |             | 0.81596 |      |     |                 |                 |
| 6     | V\$GATA2_01 | 8       | 1256 | (+) | NNNGATRNNN      | AGAGATGACA      |
| M0007 |             | 0.84625 |      |     |                 |                 |
| 7     | V\$GATA3_01 | 6       | 1257 | (+) | NNGATARNG       | GAGATGACA       |
| M0007 |             | 0.80559 |      |     |                 |                 |
| 6     | V\$GATA2_01 | 3       | 1268 | (-) | NNNGATRNNN      | AGGCATGTGG      |
| M0012 |             | 0.79152 |      |     |                 |                 |
| 7     | V\$GATA1_03 | 4       | 1274 | (+) | RNSNNGATAAANNGN | GTGGGGATGAAGAC  |
| M0007 |             | 0.85340 |      |     |                 |                 |
| 5     | V\$GATA1_01 | 6       | 1276 | (+) | SNNGATNNNN      | GGGGATGAAG      |
| M0007 |             | 0.86107 |      |     |                 |                 |
| 6     | V\$GATA2_01 | 4       | 1276 | (+) | NNNGATRNNN      | GGGGATGAAG      |
| M0007 |             | 0.83207 |      |     |                 |                 |
| 7     | V\$GATA3_01 | 8       | 1277 | (+) | NNGATARNG       | GGGATGAAG       |
| M0012 |             | 0.78466 |      |     |                 |                 |
| 7     | V\$GATA1_03 | 4       | 1289 | (+) | RNSNNGATAAANNGN | GAGTAGAGAAGAAA  |
| M0007 |             | 0.80651 |      |     |                 |                 |
| 5     | V\$GATA1_01 | 5       | 1301 | (-) | SNNGATNNNN      | AACAATCTAA      |
| M0007 |             | 0.78484 |      |     |                 |                 |
| 6     | V\$GATA2_01 | 4       | 1301 | (-) | NNNGATRNNN      | AACAATCTAA      |
| M0007 |             | 0.83695 |      |     |                 |                 |
| 7     | V\$GATA3_01 | 2       | 1301 | (-) | NNGATARNG       | AACAATCTA       |
| M0007 |             | 0.78726 |      |     |                 |                 |
| 5     | V\$GATA1_01 | 6       | 1306 | (-) | SNNGATNNNN      | TCTAATCAGT      |
| M0007 |             | 0.85644 |      |     |                 |                 |
| 7     | V\$GATA3_01 | 7       | 1306 | (-) | NNGATARNG       | TCTAATCAG       |
| M0007 |             | 0.90868 |      |     |                 |                 |
| 5     | V\$GATA1_01 | 7       | 1322 | (-) | SNNGATNNNN      | AAACATCTCG      |
| M0007 |             | 0.88317 |      |     |                 |                 |
| 6     | V\$GATA2_01 | 5       | 1322 | (-) | NNNGATRNNN      | AAACATCTCG      |
| M0007 |             | 0.80157 |      |     |                 |                 |
| 5     | V\$GATA1_01 | 9       | 1328 | (+) | SNNGATNNNN      | CTCGATCAGT      |
| M0007 |             | 0.81984 |      |     |                 |                 |
| 5     | V\$GATA1_01 | 2       | 1328 | (-) | SNNGATNNNN      | CTCGATCAGT      |
| M0007 |             | 0.80378 |      |     |                 |                 |
| 6     | V\$GATA2_01 | 9       | 1328 | (-) | NNNGATRNNN      | CTCGATCAGT      |
| M0012 |             | 0.78931 |      |     |                 |                 |
| 7     | V\$GATA1_03 | 9       | 1379 | (+) | RNSNNGATAAANNGN | CTGGAAATAAAAAGA |
| M0012 |             |         |      |     |                 |                 |
| 6     | V\$GATA1_02 | 0.83875 | 1386 | (+) | NNNNNGATANKGN   | TAAAAGATATGAAT  |
| M0012 |             |         |      |     |                 |                 |
| 8     | V\$GATA1_04 | 0.8894  | 1387 | (+) | NNCWGATARNNNN   | AAAAGATATGAAT   |

|       |             |         |      |     |                |                 |
|-------|-------------|---------|------|-----|----------------|-----------------|
| M0007 |             | 0.78775 |      |     |                |                 |
| 5     | V\$GATA1_01 | 9       | 1388 | (+) | SNNGATNNNN     | AAAGATATGA      |
| M0007 |             | 0.83852 |      |     |                |                 |
| 6     | V\$GATA2_01 | 1       | 1388 | (+) | NNNGATRNNN     | AAAGATATGA      |
| M0007 |             | 0.88746 |      |     |                |                 |
| 7     | V\$GATA3_01 | 1       | 1389 | (+) | NNGATARNG      | AAGATATGA       |
| M0020 |             | 0.89313 |      |     |                |                 |
| 3     | V\$GATA_C   | 5       | 1390 | (+) | NGATAAGNMNN    | AGATATGAATA     |
| M0020 |             | 0.85896 |      |     |                |                 |
| 3     | V\$GATA_C   | 2       | 1401 | (+) | NGATAAGNMNN    | AGACAAAAATT     |
| M0007 |             | 0.82181 |      |     |                |                 |
| 5     | V\$GATA1_01 | 6       | 1415 | (-) | SNNGATNNNN     | GAAAATCACT      |
| M0007 |             | 0.79070 |      |     |                |                 |
| 6     | V\$GATA2_01 | 8       | 1415 | (-) | NNNGATRNNN     | GAAAATCACT      |
| M0012 |             |         |      |     |                |                 |
| 6     | V\$GATA1_02 | 0.785   | 1432 | (+) | NNNNNGATANKGNN | GTAGAGAAAAGATA  |
| M0012 |             |         |      |     |                |                 |
| 6     | V\$GATA1_02 | 0.84375 | 1437 | (+) | NNNNNGATANKGNN | GAAAAGATAAAAAAT |
| M0012 |             | 0.84933 |      |     |                |                 |
| 7     | V\$GATA1_03 | 9       | 1437 | (+) | RNSNNGATAANNGN | GAAAAGATAAAAAAT |
| M0012 |             | 0.92156 |      |     |                |                 |
| 8     | V\$GATA1_04 | 9       | 1438 | (+) | NNCWGATARNNNN  | AAAAGATAAAAAAT  |
| M0007 |             |         |      |     |                |                 |
| 7     | V\$GATA3_01 | 0.8786  | 1440 | (+) | NNGATARNG      | AAGATAAAA       |
| M0020 |             | 0.93911 |      |     |                |                 |
| 3     | V\$GATA_C   | 2       | 1441 | (+) | NGATAAGNMNN    | AGATAAAAAATA    |
| M0007 |             | 0.80920 |      |     |                |                 |
| 6     | V\$GATA2_01 | 2       | 1452 | (-) | NNNGATRNNN     | AAGTATGACC      |
| M0007 |             | 0.80700 |      |     |                |                 |
| 5     | V\$GATA1_01 | 9       | 1483 | (+) | SNNGATNNNN     | TCAGATGCAC      |
| M0007 |             | 0.84167 |      |     |                |                 |
| 6     | V\$GATA2_01 | 8       | 1483 | (+) | NNNGATRNNN     | TCAGATGCAC      |
| M0012 |             | 0.79519 |      |     |                |                 |
| 7     | V\$GATA1_03 | 8       | 1493 | (+) | RNSNNGATAANNGN | CTCAAGAAAAGTGA  |
| M0007 |             | 0.77838 |      |     |                |                 |
| 5     | V\$GATA1_01 | 1       | 1547 | (-) | SNNGATNNNN     | TCTAATCCCA      |
| M0007 |             | 0.81416 |      |     |                |                 |
| 6     | V\$GATA2_01 | 3       | 1547 | (-) | NNNGATRNNN     | TCTAATCCCA      |
| M0007 |             | 0.85777 |      |     |                |                 |
| 7     | V\$GATA3_01 | 6       | 1547 | (-) | NNGATARNG      | TCTAATCCC       |
| M0007 |             | 0.79220 |      |     |                |                 |
| 5     | V\$GATA1_01 | 1       | 1555 | (-) | SNNGATNNNN     | CAGAATCTAA      |
| M0007 |             | 0.82454 |      |     |                |                 |
| 7     | V\$GATA3_01 | 6       | 1555 | (-) | NNGATARNG      | CAGAATCTA       |
| M0020 |             | 0.83783 |      |     |                |                 |
| 3     | V\$GATA_C   | 8       | 1563 | (-) | NGATAAGNMNN    | AAGCGATATCT     |
| M0007 |             | 0.85439 |      |     |                |                 |
| 5     | V\$GATA1_01 | 3       | 1564 | (+) | SNNGATNNNN     | AGCGATATCT      |
| M0007 |             | 0.88588 |      |     |                |                 |
| 6     | V\$GATA2_01 | 2       | 1564 | (+) | NNNGATRNNN     | AGCGATATCT      |
| M0012 |             | 0.77218 |      |     |                |                 |
| 6     | V\$GATA1_02 | 8       | 1564 | (-) | NNNNNGATANKGNN | AGCGATATCTGGCA  |
| M0012 |             | 0.88296 |      |     |                |                 |
| 8     | V\$GATA1_04 | 6       | 1564 | (-) | NNCWGATARNNNN  | AGCGATATCTGGC   |
| M0007 |             | 0.91214 |      |     |                |                 |
| 5     | V\$GATA1_01 | 2       | 1566 | (-) | SNNGATNNNN     | CGATATCTGG      |
| M0007 |             | 0.94361 |      |     |                |                 |
| 6     | V\$GATA2_01 | 8       | 1566 | (-) | NNNGATRNNN     | CGATATCTGG      |
| M0007 |             | 0.87992 |      |     |                |                 |
| 7     | V\$GATA3_01 | 9       | 1566 | (-) | NNGATARNG      | CGATATCTG       |
| M0012 |             | 0.79397 |      |     |                |                 |
| 7     | V\$GATA1_03 | 4       | 1578 | (+) | RNSNNGATAANNGN | ATAAAAAATAATAAA |
| M0007 |             | 0.80355 |      |     |                |                 |
| 5     | V\$GATA1_01 | 4       | 1609 | (-) | SNNGATNNNN     | GTGAATCAAC      |
| M0020 |             | 0.83845 |      |     |                |                 |
| 3     | V\$GATA_C   | 9       | 1632 | (-) | NGATAAGNMNN    | TGTAAATATCT     |

|       |             |         |      |     |                |                |
|-------|-------------|---------|------|-----|----------------|----------------|
| M0012 |             | 0.79562 |      |     |                |                |
| 6     | V\$GATA1_02 | 5       | 1633 | (-) | NNNNNGATANKGNN | GTAAATATCTGTAA |
| M0012 |             | 0.85324 |      |     |                |                |
| 8     | V\$GATA1_04 | 8       | 1633 | (-) | NNCWGATARNNNN  | GTAAATATCTGTA  |
| M0007 |             | 0.83168 |      |     |                |                |
| 5     | V\$GATA1_01 | 8       | 1635 | (-) | SNNGATNNNN     | AAATATCTGT     |
| M0007 |             | 0.87009 |      |     |                |                |
| 6     | V\$GATA2_01 | 5       | 1635 | (-) | NNNGATRNNN     | AAATATCTGT     |
| M0007 |             | 0.82897 |      |     |                |                |
| 7     | V\$GATA3_01 | 7       | 1635 | (-) | NNGATARNG      | AAATATCTG      |
| M0007 |             | 0.78935 |      |     |                |                |
| 6     | V\$GATA2_01 | 5       | 1689 | (+) | NNNGATRNNN     | TGAGATGAAA     |
| M0007 |             | 0.84226 |      |     |                |                |
| 7     | V\$GATA3_01 | 8       | 1690 | (+) | NNGATARNG      | GAGATGAAA      |
| M0007 |             | 0.78677 |      |     |                |                |
| 5     | V\$GATA1_01 | 2       | 1709 | (+) | SNNGATNNNN     | TAGGATATAG     |
| M0007 |             | 0.88182 |      |     |                |                |
| 6     | V\$GATA2_01 | 2       | 1709 | (+) | NNNGATRNNN     | TAGGATATAG     |
| M0007 |             | 0.83650 |      |     |                |                |
| 7     | V\$GATA3_01 | 9       | 1710 | (+) | NNGATARNG      | AGGATATAG      |
| M0020 |             | 0.84125 |      |     |                |                |
| 3     | V\$GATA_C   | 5       | 1711 | (+) | NGATAAGNMNN    | GGATATAGGAT    |
| M0007 |             | 0.77936 |      |     |                |                |
| 5     | V\$GATA1_01 | 8       | 1716 | (+) | SNNGATNNNN     | TAGGATGTTA     |
| M0007 |             | 0.85069 |      |     |                |                |
| 6     | V\$GATA2_01 | 9       | 1716 | (+) | NNNGATRNNN     | TAGGATGTTA     |
| M0012 |             | 0.83047 |      |     |                |                |
| 7     | V\$GATA1_03 | 5       | 1717 | (+) | RNSNNGATAANNGN | AGGATGTTAGCAGA |
| M0007 |             | 0.84007 |      |     |                |                |
| 5     | V\$GATA1_01 | 9       | 1731 | (-) | SNNGATNNNN     | AAACATCTGA     |
| M0007 |             | 0.87415 |      |     |                |                |
| 6     | V\$GATA2_01 | 4       | 1731 | (-) | NNNGATRNNN     | AAACATCTGA     |
| M0012 |             | 0.77812 |      |     |                |                |
| 6     | V\$GATA1_02 | 5       | 1755 | (-) | NNNNNGATANKGNN | AACATTAACCTGAA |
| M0007 |             | 0.78258 |      |     |                |                |
| 6     | V\$GATA2_01 | 9       | 1805 | (+) | NNNGATRNNN     | GGCCATATGA     |
| M0007 |             | 0.79476 |      |     |                |                |
| 6     | V\$GATA2_01 | 8       | 1807 | (-) | NNNGATRNNN     | CCATATGATA     |
| M0012 |             |         |      |     |                |                |
| 8     | V\$GATA1_04 | 0.89185 | 1809 | (+) | NNCWGATARNNNN  | ATATGATAAAATG  |
| M0007 |             | 0.79837 |      |     |                |                |
| 6     | V\$GATA2_01 | 6       | 1810 | (+) | NNNGATRNNN     | TATGATAAAA     |
| M0007 |             | 0.85511 |      |     |                |                |
| 7     | V\$GATA3_01 | 7       | 1811 | (+) | NNGATARNG      | ATGATAAAA      |
| M0020 |             | 0.84498 |      |     |                |                |
| 3     | V\$GATA_C   | 3       | 1812 | (+) | NGATAAGNMNN    | TGATAAAATGT    |
| M0007 |             | 0.78980 |      |     |                |                |
| 6     | V\$GATA2_01 | 6       | 1861 | (-) | NNNGATRNNN     | TGCCATGAGG     |
| M0007 |             | 0.83563 |      |     |                |                |
| 5     | V\$GATA1_01 | 7       | 1875 | (+) | SNNGATNNNN     | CAGGATCTTG     |
| M0007 |             | 0.86130 |      |     |                |                |
| 5     | V\$GATA1_01 | 3       | 1875 | (-) | SNNGATNNNN     | CAGGATCTTG     |
| M0007 |             | 0.86648 |      |     |                |                |
| 6     | V\$GATA2_01 | 6       | 1875 | (+) | NNNGATRNNN     | CAGGATCTTG     |
| M0007 |             | 0.86332 |      |     |                |                |
| 6     | V\$GATA2_01 | 9       | 1875 | (-) | NNNGATRNNN     | CAGGATCTTG     |
| M0007 |             | 0.77393 |      |     |                |                |
| 5     | V\$GATA1_01 | 9       | 1896 | (-) | SNNGATNNNN     | AGGGATCAAA     |
| M0012 |             |         |      |     |                |                |
| 6     | V\$GATA1_02 | 0.9075  | 1949 | (-) | NNNNNGATANKGNN | TACACTATCTTTGG |
| M0012 |             | 0.80965 |      |     |                |                |
| 7     | V\$GATA1_03 | 2       | 1949 | (-) | RNSNNGATAANNGN | TACACTATCTTTGG |
| M0007 |             |         |      |     |                |                |
| 5     | V\$GATA1_01 | 0.8692  | 1951 | (-) | SNNGATNNNN     | CACTATCTTT     |
| M0007 |             | 0.91159 |      |     |                |                |
| 6     | V\$GATA2_01 | 2       | 1951 | (-) | NNNGATRNNN     | CACTATCTTT     |

|       |             |         |      |     |                |                |
|-------|-------------|---------|------|-----|----------------|----------------|
| M0007 |             | 0.96189 |      |     |                |                |
| 7     | V\$GATA3_01 | 6       | 1951 | (-) | NNGATARNG      | CACTATCTT      |
| M0007 |             | 0.88391 |      |     |                |                |
| 7     | V\$GATA3_01 | 7       | 2002 | (+) | NNGATARNG      | TAGATTGAG      |
| M0020 |             | 0.83162 |      |     |                |                |
| 3     | V\$GATA_C   | 5       | 2024 | (-) | NGATAAGNMNN    | TTTCCTCATCT    |
| M0012 |             | 0.82680 |      |     |                |                |
| 7     | V\$GATA1_03 | 1       | 2025 | (-) | RNSNNGATAANNGN | TTCTCATCTTCCC  |
| M0007 |             | 0.88104 |      |     |                |                |
| 5     | V\$GATA1_01 | 6       | 2027 | (-) | SNNGATNNNN     | CCTCATCTTC     |
| M0007 |             |         |      |     |                |                |
| 6     | V\$GATA2_01 | 0.88498 | 2027 | (-) | NNNGATRNNN     | CCTCATCTTC     |
| M0007 |             | 0.90075 |      |     |                |                |
| 7     | V\$GATA3_01 | 3       | 2027 | (-) | NNGATARNG      | CCTCATCTT      |
| M0007 |             | 0.85636 |      |     |                |                |
| 5     | V\$GATA1_01 | 7       | 2045 | (-) | SNNGATNNNN     | AGGAATCGAG     |
| M0007 |             | 0.78439 |      |     |                |                |
| 6     | V\$GATA2_01 | 3       | 2045 | (-) | NNNGATRNNN     | AGGAATCGAG     |
| M0007 |             | 0.81194 |      |     |                |                |
| 5     | V\$GATA1_01 | 5       | 2067 | (-) | SNNGATNNNN     | CCTCATCCTT     |
| M0007 |             | 0.85250 |      |     |                |                |
| 6     | V\$GATA2_01 | 3       | 2067 | (-) | NNNGATRNNN     | CCTCATCCTT     |
| M0007 |             |         |      |     |                |                |
| 7     | V\$GATA3_01 | 0.85556 | 2067 | (-) | NNGATARNG      | CCTCATCCT      |
| M0007 |             | 0.77245 |      |     |                |                |
| 5     | V\$GATA1_01 | 8       | 2077 | (-) | SNNGATNNNN     | GCCTGTCTGG     |
| M0007 |             | 0.79115 |      |     |                |                |
| 6     | V\$GATA2_01 | 9       | 2077 | (-) | NNNGATRNNN     | GCCTGTCTGG     |
| M0012 |             | 0.78564 |      |     |                |                |
| 7     | V\$GATA1_03 | 4       | 2104 | (+) | RNSNNGATAANNGN | AGAGAGGTAAATAC |
| M0012 |             | 0.78809 |      |     |                |                |
| 7     | V\$GATA1_03 | 4       | 2146 | (-) | RNSNNGATAANNGN | AGTACTGTCTGCCT |
| M0007 |             | 0.80153 |      |     |                |                |
| 6     | V\$GATA2_01 | 4       | 2156 | (-) | NNNGATRNNN     | GCCTATGTGT     |
| M0012 |             | 0.83733 |      |     |                |                |
| 7     | V\$GATA1_03 | 5       | 2162 | (+) | RNSNNGATAANNGN | GTGTAGAAAATCGC |
| M0007 |             | 0.82428 |      |     |                |                |
| 5     | V\$GATA1_01 | 4       | 2167 | (-) | SNNGATNNNN     | GAAAATCGCA     |
| M0007 |             | 0.83130 |      |     |                |                |
| 6     | V\$GATA2_01 | 4       | 2167 | (-) | NNNGATRNNN     | GAAAATCGCA     |
| M0012 |             | 0.79201 |      |     |                |                |
| 7     | V\$GATA1_03 | 4       | 2173 | (-) | RNSNNGATAANNGN | CGCATTACCAACAT |
| M0007 |             | 0.85143 |      |     |                |                |
| 5     | V\$GATA1_01 | 1       | 2181 | (-) | SNNGATNNNN     | CAACATCATA     |
| M0007 |             | 0.86783 |      |     |                |                |
| 6     | V\$GATA2_01 | 9       | 2181 | (-) | NNNGATRNNN     | CAACATCATA     |
| M0007 |             | 0.82454 |      |     |                |                |
| 7     | V\$GATA3_01 | 6       | 2181 | (-) | NNGATARNG      | CAACATCAT      |
| M0012 |             | 0.79718 |      |     |                |                |
| 6     | V\$GATA1_02 | 8       | 2194 | (+) | NNNNNGATANKGNN | GTATAAATAATGCA |
| M0007 |             | 0.88252 |      |     |                |                |
| 5     | V\$GATA1_01 | 7       | 2206 | (-) | SNNGATNNNN     | CACAATCTCA     |
| M0007 |             | 0.88768 |      |     |                |                |
| 6     | V\$GATA2_01 | 6       | 2206 | (-) | NNNGATRNNN     | CACAATCTCA     |
| M0007 |             | 0.94550 |      |     |                |                |
| 7     | V\$GATA3_01 | 3       | 2206 | (-) | NNGATARNG      | CACAATCTC      |
| M0007 |             |         |      |     |                |                |
| 5     | V\$GATA1_01 | 0.7769  | 2213 | (+) | SNNGATNNNN     | TCAGATTTAT     |
| M0007 |             | 0.79792 |      |     |                |                |
| 6     | V\$GATA2_01 | 5       | 2213 | (+) | NNNGATRNNN     | TCAGATTTAT     |
| M0012 |             | 0.81283 |      |     |                |                |
| 7     | V\$GATA1_03 | 7       | 2241 | (-) | RNSNNGATAANNGN | TCATTTATGTTTAT |
| M0020 |             | 0.83845 |      |     |                |                |
| 3     | V\$GATA_C   | 9       | 2253 | (-) | NGATAAGNMNN    | ATCCACTATCT    |
| M0012 |             | 0.94031 |      |     |                |                |
| 6     | V\$GATA1_02 | 3       | 2254 | (-) | NNNNNGATANKGNN | TCCACTATCTCAAC |

|       |             |         |      |     |                |                |
|-------|-------------|---------|------|-----|----------------|----------------|
| M0012 |             | 0.82043 |      |     |                |                |
| 7     | V\$GATA1_03 | 1       | 2254 | (-) | RNSNNGATAANNGN | TCCACTATCTCAAC |
| M0012 |             | 0.87990 |      |     |                |                |
| 8     | V\$GATA1_04 | 2       | 2254 | (-) | NNCWGATARNNNN  | TCCACTATCTCAA  |
| M0007 |             | 0.90621 |      |     |                |                |
| 5     | V\$GATA1_01 | 9       | 2256 | (-) | SNNGATNNNN     | CACTATCTCA     |
| M0007 |             | 0.95218 |      |     |                |                |
| 6     | V\$GATA2_01 | 8       | 2256 | (-) | NNNGATRNNN     | CACTATCTCA     |
| M0007 |             | 0.97917 |      |     |                |                |
| 7     | V\$GATA3_01 | 6       | 2256 | (-) | NNGATARNG      | CACTATCTC      |
| M0012 |             | 0.80531 |      |     |                |                |
| 6     | V\$GATA1_02 | 2       | 2265 | (-) | NNNNNGATANKGNN | AACAGTATCCTATA |
| M0007 |             | 0.84748 |      |     |                |                |
| 5     | V\$GATA1_01 | 3       | 2267 | (-) | SNNGATNNNN     | CAGTATCCTA     |
| M0007 |             | 0.93324 |      |     |                |                |
| 6     | V\$GATA2_01 | 3       | 2267 | (-) | NNNGATRNNN     | CAGTATCCTA     |
| M0007 |             | 0.83739 |      |     |                |                |
| 7     | V\$GATA3_01 | 5       | 2267 | (-) | NNGATARNG      | CAGTATCCT      |
| M0012 |             | 0.77218 |      |     |                |                |
| 6     | V\$GATA1_02 | 8       | 2315 | (-) | NNNNNGATANKGNN | TGTACCATCTGTAC |
| M0007 |             |         |      |     |                |                |
| 5     | V\$GATA1_01 | 0.84304 | 2317 | (-) | SNNGATNNNN     | TACCATCTGT     |
| M0007 |             | 0.84844 |      |     |                |                |
| 6     | V\$GATA2_01 | 4       | 2317 | (-) | NNNGATRNNN     | TACCATCTGT     |
| M0007 |             | 0.86752 |      |     |                |                |
| 7     | V\$GATA3_01 | 3       | 2317 | (-) | NNGATARNG      | TACCATCTG      |
| M0012 |             | 0.80083 |      |     |                |                |
| 7     | V\$GATA1_03 | 3       | 2387 | (+) | RNSNNGATAANNGN | ACACAGACAAGAAC |
| M0020 |             | 0.89624 |      |     |                |                |
| 3     | V\$GATA_C   | 1       | 2391 | (+) | NGATAAGNMNN    | AGACAAGAACA    |
| M0007 |             | 0.83168 |      |     |                |                |
| 5     | V\$GATA1_01 | 8       | 2441 | (-) | SNNGATNNNN     | TACAATCTAG     |
| M0007 |             | 0.86885 |      |     |                |                |
| 7     | V\$GATA3_01 | 2       | 2441 | (-) | NNGATARNG      | TACAATCTA      |
| M0012 |             | 0.79812 |      |     |                |                |
| 6     | V\$GATA1_02 | 5       | 2445 | (+) | NNNNNGATANKGNN | ATCTAGATAAATAT |
| M0012 |             | 0.87285 |      |     |                |                |
| 7     | V\$GATA1_03 | 6       | 2445 | (+) | RNSNNGATAANNGN | ATCTAGATAAATAT |
| M0012 |             | 0.87071 |      |     |                |                |
| 8     | V\$GATA1_04 | 1       | 2446 | (+) | NNCWGATARNNNN  | TCTAGATAAATAT  |
| M0007 |             | 0.78627 |      |     |                |                |
| 5     | V\$GATA1_01 | 8       | 2447 | (+) | SNNGATNNNN     | CTAGATAAAT     |
| M0007 |             | 0.82233 |      |     |                |                |
| 7     | V\$GATA3_01 | 1       | 2448 | (+) | NNGATARNG      | TAGATAAAT      |
| M0020 |             | 0.94066 |      |     |                |                |
| 3     | V\$GATA_C   | 5       | 2449 | (+) | NGATAAGNMNN    | AGATAAATATA    |
| M0012 |             | 0.83486 |      |     |                |                |
| 8     | V\$GATA1_04 | 5       | 2453 | (-) | NNCWGATARNNNN  | AAATATATCTTAT  |
| M0007 |             | 0.77986 |      |     |                |                |
| 5     | V\$GATA1_01 | 2       | 2455 | (-) | SNNGATNNNN     | ATATATCTTA     |
| M0007 |             | 0.85430 |      |     |                |                |
| 6     | V\$GATA2_01 | 8       | 2455 | (-) | NNNGATRNNN     | ATATATCTTA     |
| M0020 |             | 0.92140 |      |     |                |                |
| 3     | V\$GATA_C   | 4       | 2457 | (-) | NGATAAGNMNN    | ATATCTTATCC    |
| M0012 |             | 0.77812 |      |     |                |                |
| 6     | V\$GATA1_02 | 5       | 2458 | (-) | NNNNNGATANKGNN | TATCTTATCCCAGT |
| M0012 |             | 0.79617 |      |     |                |                |
| 7     | V\$GATA1_03 | 8       | 2458 | (-) | RNSNNGATAANNGN | TATCTTATCCCAGT |
| M0007 |             | 0.80207 |      |     |                |                |
| 5     | V\$GATA1_01 | 3       | 2460 | (-) | SNNGATNNNN     | TCTTATCCCA     |
| M0007 |             | 0.87866 |      |     |                |                |
| 6     | V\$GATA2_01 | 5       | 2460 | (-) | NNNGATRNNN     | TCTTATCCCA     |
| M0007 |             | 0.89144 |      |     |                |                |
| 7     | V\$GATA3_01 | 9       | 2460 | (-) | NNGATARNG      | TCTTATCCC      |
| M0020 |             | 0.87853 |      |     |                |                |
| 3     | V\$GATA_C   | 4       | 2479 | (-) | NGATAAGNMNN    | TATTTGTATCT    |



|       |             |         |      |     |                |                |
|-------|-------------|---------|------|-----|----------------|----------------|
| M0012 |             | 0.82687 |      |     |                |                |
| 6     | V\$GATA1_02 | 5       | 2480 | (-) | NNNNNGATANKGNN | ATTTGTATCTCTTA |
| M0012 |             | 0.82628 |      |     |                |                |
| 8     | V\$GATA1_04 | 7       | 2480 | (-) | NNCWGATARNNNN  | ATTTGTATCTCTT  |
| M0007 |             | 0.78578 |      |     |                |                |
| 5     | V\$GATA1_01 | 5       | 2482 | (-) | SNNGATNNNN     | TTGTATCTCT     |
| M0007 |             | 0.81145 |      |     |                |                |
| 6     | V\$GATA2_01 | 7       | 2482 | (-) | NNNGATRNNN     | TTGTATCTCT     |
| M0007 |             | 0.84492 |      |     |                |                |
| 7     | V\$GATA3_01 | 7       | 2482 | (-) | NNGATARNG      | TTGTATCTC      |
| M0007 |             | 0.81145 |      |     |                |                |
| 5     | V\$GATA1_01 | 1       | 2500 | (+) | SNNGATNNNN     | GGTGCTAGGT     |
| M0007 |             | 0.82181 |      |     |                |                |
| 5     | V\$GATA1_01 | 6       | 2530 | (+) | SNNGATNNNN     | CAGGATGATA     |
| M0007 |             | 0.84483 |      |     |                |                |
| 6     | V\$GATA2_01 | 5       | 2530 | (+) | NNNGATRNNN     | CAGGATGATA     |
| M0012 |             |         |      |     |                |                |
| 6     | V\$GATA1_02 | 0.785   | 2531 | (+) | NNNNNGATANKGNN | AGGATGATACTCCA |
| M0012 |             | 0.87334 |      |     |                |                |
| 7     | V\$GATA1_03 | 6       | 2531 | (+) | RNSNNGATAANNGN | AGGATGATACTCCA |
| M0007 |             | 0.90276 |      |     |                |                |
| 5     | V\$GATA1_01 | 4       | 2533 | (+) | SNNGATNNNN     | GATGATACTC     |
| M0007 |             | 0.90527 |      |     |                |                |
| 6     | V\$GATA2_01 | 7       | 2533 | (+) | NNNGATRNNN     | GATGATACTC     |
| M0007 |             | 0.81737 |      |     |                |                |
| 5     | V\$GATA1_01 | 4       | 2545 | (+) | SNNGATNNNN     | GAGGATGACA     |
| M0007 |             | 0.86919 |      |     |                |                |
| 6     | V\$GATA2_01 | 3       | 2545 | (+) | NNNGATRNNN     | GAGGATGACA     |
| M0020 |             | 0.89717 |      |     |                |                |
| 3     | V\$GATA_C   | 3       | 2549 | (-) | NGATAAGNMNN    | ATGACATATCA    |
| M0007 |             | 0.78394 |      |     |                |                |
| 6     | V\$GATA2_01 | 2       | 2550 | (+) | NNNGATRNNN     | TGACATATCA     |
| M0012 |             | 0.88725 |      |     |                |                |
| 8     | V\$GATA1_04 | 5       | 2550 | (-) | NNCWGATARNNNN  | TGACATATCAGAC  |
| M0007 |             | 0.87314 |      |     |                |                |
| 5     | V\$GATA1_01 | 9       | 2552 | (-) | SNNGATNNNN     | ACATATCAGA     |
| M0007 |             | 0.89760 |      |     |                |                |
| 6     | V\$GATA2_01 | 9       | 2552 | (-) | NNNGATRNNN     | ACATATCAGA     |
| M0007 |             | 0.82631 |      |     |                |                |
| 7     | V\$GATA3_01 | 8       | 2552 | (-) | NNGATARNG      | ACATATCAG      |
| M0007 |             | 0.80739 |      |     |                |                |
| 6     | V\$GATA2_01 | 7       | 2572 | (-) | NNNGATRNNN     | ACATATGTTC     |
| M0012 |             | 0.79152 |      |     |                |                |
| 7     | V\$GATA1_03 | 4       | 2576 | (+) | RNSNNGATAANNGN | ATGTTCATAATTAT |
| M0012 |             | 0.78417 |      |     |                |                |
| 7     | V\$GATA1_03 | 4       | 2582 | (+) | RNSNNGATAANNGN | ATAATTATAATAAA |
| M0012 |             | 0.84466 |      |     |                |                |
| 8     | V\$GATA1_04 | 9       | 2621 | (-) | NNCWGATARNNNN  | CTCCTTTTCTGTT  |
| M0007 |             | 0.78349 |      |     |                |                |
| 6     | V\$GATA2_01 | 1       | 2628 | (+) | NNNGATRNNN     | TCTGTTAGCC     |
| M0007 |             | 0.82872 |      |     |                |                |
| 5     | V\$GATA1_01 | 7       | 2729 | (+) | SNNGATNNNN     | TCAGATTTGT     |
| M0007 |             | 0.84438 |      |     |                |                |
| 6     | V\$GATA2_01 | 4       | 2729 | (+) | NNNGATRNNN     | TCAGATTTGT     |
| M0012 |             | 0.81187 |      |     |                |                |
| 6     | V\$GATA1_02 | 5       | 2740 | (+) | NNNNNGATANKGNN | AAATAGATAGCTCT |
| M0012 |             | 0.82386 |      |     |                |                |
| 7     | V\$GATA1_03 | 1       | 2740 | (+) | RNSNNGATAANNGN | AAATAGATAGCTCT |
| M0012 |             | 0.85079 |      |     |                |                |
| 8     | V\$GATA1_04 | 7       | 2741 | (+) | NNCWGATARNNNN  | AATAGATAGCTCT  |
| M0007 |             | 0.82181 |      |     |                |                |
| 5     | V\$GATA1_01 | 6       | 2742 | (+) | SNNGATNNNN     | ATAGATAGCT     |
| M0007 |             | 0.83581 |      |     |                |                |
| 6     | V\$GATA2_01 | 4       | 2742 | (+) | NNNGATRNNN     | ATAGATAGCT     |
| M0007 |             | 0.85467 |      |     |                |                |
| 7     | V\$GATA3_01 | 4       | 2743 | (+) | NNGATARNG      | TAGATAGCT      |

|       |             |         |      |     |                |                |
|-------|-------------|---------|------|-----|----------------|----------------|
| M0007 |             | 0.81934 |      |     |                |                |
| 5     | V\$GATA1_01 | 8       | 2869 | (+) | SNNGATNNNN     | TAAGATATTT     |
| M0007 |             | 0.89445 |      |     |                |                |
| 6     | V\$GATA2_01 | 2       | 2869 | (+) | NNNGATRNNN     | TAAGATATTT     |
| M0007 |             | 0.83473 |      |     |                |                |
| 7     | V\$GATA3_01 | 6       | 2870 | (+) | NNGATARNG      | AAGATATTT      |
| M0007 |             | 0.84254 |      |     |                |                |
| 5     | V\$GATA1_01 | 7       | 2924 | (+) | SNNGATNNNN     | TCTGATGATT     |
| M0007 |             | 0.84799 |      |     |                |                |
| 6     | V\$GATA2_01 | 3       | 2924 | (+) | NNNGATRNNN     | TCTGATGATT     |
| M0007 |             | 0.84452 |      |     |                |                |
| 5     | V\$GATA1_01 | 1       | 2927 | (+) | SNNGATNNNN     | GATGATTTAG     |
| M0007 |             | 0.80604 |      |     |                |                |
| 6     | V\$GATA2_01 | 4       | 2927 | (+) | NNNGATRNNN     | GATGATTTAG     |
| M0007 |             | 0.82454 |      |     |                |                |
| 7     | V\$GATA3_01 | 6       | 2928 | (+) | NNGATARNG      | ATGATTTAG      |
| M0012 |             | 0.85906 |      |     |                |                |
| 6     | V\$GATA1_02 | 3       | 3006 | (+) | NNNNNGATANKGNN | GGTAAGATAATGTT |
| M0012 |             | 0.80842 |      |     |                |                |
| 7     | V\$GATA1_03 | 7       | 3006 | (+) | RNSNNGATAANNGN | GGTAAGATAATGTT |
| M0012 |             | 0.87591 |      |     |                |                |
| 8     | V\$GATA1_04 | 9       | 3007 | (+) | NNCWGATARNNNN  | GTAAGATAATGTT  |
| M0007 |             | 0.81243 |      |     |                |                |
| 5     | V\$GATA1_01 | 8       | 3008 | (+) | SNNGATNNNN     | TAAGATAATG     |
| M0007 |             | 0.89264 |      |     |                |                |
| 6     | V\$GATA2_01 | 8       | 3008 | (+) | NNNGATRNNN     | TAAGATAATG     |
| M0007 |             |         |      |     |                |                |
| 7     | V\$GATA3_01 | 0.93354 | 3009 | (+) | NNGATARNG      | AAGATAATG      |
| M0020 |             | 0.85554 |      |     |                |                |
| 3     | V\$GATA_C   | 5       | 3010 | (+) | NGATAAGNMNN    | AGATAATGTTC    |
| M0007 |             | 0.84896 |      |     |                |                |
| 5     | V\$GATA1_01 | 3       | 3037 | (+) | SNNGATNNNN     | CCAGATTTAG     |
| M0007 |             | 0.82002 |      |     |                |                |
| 6     | V\$GATA2_01 | 7       | 3037 | (+) | NNNGATRNNN     | CCAGATTTAG     |
| M0007 |             | 0.84226 |      |     |                |                |
| 7     | V\$GATA3_01 | 8       | 3038 | (+) | NNGATARNG      | CAGATTTAG      |
| M0020 |             | 0.86859 |      |     |                |                |
| 3     | V\$GATA_C   | 3       | 3059 | (-) | NGATAAGNMNN    | CTGTATTATCT    |
| M0012 |             |         |      |     |                |                |
| 6     | V\$GATA1_02 | 0.87125 | 3060 | (-) | NNNNNGATANKGNN | TGTATTATCTTTTT |
| M0012 |             | 0.86599 |      |     |                |                |
| 7     | V\$GATA1_03 | 7       | 3060 | (-) | RNSNNGATAANNGN | TGTATTATCTTTTT |
| M0012 |             | 0.88296 |      |     |                |                |
| 8     | V\$GATA1_04 | 6       | 3060 | (-) | NNCWGATARNNNN  | TGTATTATCTTTT  |
| M0007 |             | 0.81732 |      |     |                |                |
| 6     | V\$GATA2_01 | 1       | 3062 | (-) | NNNGATRNNN     | TATTATCTTT     |
| M0007 |             | 0.89853 |      |     |                |                |
| 7     | V\$GATA3_01 | 8       | 3062 | (-) | NNGATARNG      | TATTATCTT      |
| M0012 |             | 0.82116 |      |     |                |                |
| 7     | V\$GATA1_03 | 6       | 3157 | (+) | RNSNNGATAANNGN | GGGTGCTAAGAGT  |
| M0007 |             | 0.79792 |      |     |                |                |
| 6     | V\$GATA2_01 | 5       | 3172 | (+) | NNNGATRNNN     | GGACATGACG     |
| M0012 |             | 0.78588 |      |     |                |                |
| 7     | V\$GATA1_03 | 9       | 3196 | (-) | RNSNNGATAANNGN | TCACTTTTCACTTT |
| M0007 |             | 0.78627 |      |     |                |                |
| 5     | V\$GATA1_01 | 8       | 3204 | (-) | SNNGATNNNN     | CACTTTCATG     |
| M0007 |             | 0.82625 |      |     |                |                |
| 5     | V\$GATA1_01 | 9       | 3257 | (-) | SNNGATNNNN     | GAGAATCCCA     |
| M0007 |             | 0.86017 |      |     |                |                |
| 6     | V\$GATA2_01 | 1       | 3257 | (-) | NNNGATRNNN     | GAGAATCCCA     |
| M0007 |             | 0.79341 |      |     |                |                |
| 6     | V\$GATA2_01 | 5       | 3293 | (-) | NNNGATRNNN     | GTCTATGGGG     |
| M0007 |             |         |      |     |                |                |
| 5     | V\$GATA1_01 | 0.7769  | 3313 | (+) | SNNGATNNNN     | TTGGATACGA     |
| M0007 |             | 0.81506 |      |     |                |                |
| 6     | V\$GATA2_01 | 5       | 3313 | (+) | NNNGATRNNN     | TTGGATACGA     |

|       |             |         |      |     |                |                |
|-------|-------------|---------|------|-----|----------------|----------------|
| M0020 |             | 0.86424 |      |     |                |                |
| 3     | V\$GATA_C   | 4       | 3315 | (+) | NGATAAGNMNN    | GGATACGACTG    |
| M0007 |             |         |      |     |                |                |
| 5     | V\$GATA1_01 | 0.7769  | 3337 | (-) | SNNGATNNNN     | CAGCAGCAGC     |
| M0012 |             | 0.80181 |      |     |                |                |
| 7     | V\$GATA1_03 | 3       | 3351 | (+) | RNSNNGATAANNGN | GGGCAGTTAAGGCT |
| M0012 |             | 0.83180 |      |     |                |                |
| 8     | V\$GATA1_04 | 1       | 3352 | (+) | NNCWGATARNNNN  | GGCAGTTAAGGCT  |
| M0020 |             | 0.83970 |      |     |                |                |
| 3     | V\$GATA_C   | 2       | 3355 | (+) | NGATAAGNMNN    | AGTTAAGGCTT    |
| M0007 |             | 0.79565 |      |     |                |                |
| 5     | V\$GATA1_01 | 6       | 3417 | (+) | SNNGATNNNN     | TTCGATTCCT     |
| M0007 |             | 0.82181 |      |     |                |                |
| 5     | V\$GATA1_01 | 6       | 3427 | (+) | SNNGATNNNN     | GAAGATCTGC     |
| M0007 |             | 0.83020 |      |     |                |                |
| 5     | V\$GATA1_01 | 7       | 3427 | (-) | SNNGATNNNN     | GAAGATCTGC     |
| M0007 |             | 0.84709 |      |     |                |                |
| 6     | V\$GATA2_01 | 1       | 3427 | (+) | NNNGATRNNN     | GAAGATCTGC     |
| M0007 |             | 0.84889 |      |     |                |                |
| 6     | V\$GATA2_01 | 5       | 3427 | (-) | NNNGATRNNN     | GAAGATCTGC     |
| M0012 |             |         |      |     |                |                |
| 6     | V\$GATA1_02 | 0.855   | 3441 | (+) | NNNNNGATANKGNN | GAAGGGATAGGCTA |
| M0012 |             |         |      |     |                |                |
| 7     | V\$GATA1_03 | 0.82974 | 3441 | (+) | RNSNNGATAANNGN | GAAGGGATAGGCTA |
| M0007 |             | 0.87956 |      |     |                |                |
| 5     | V\$GATA1_01 | 6       | 3443 | (+) | SNNGATNNNN     | AGGGATAGGC     |
| M0007 |             | 0.92377 |      |     |                |                |
| 6     | V\$GATA2_01 | 1       | 3443 | (+) | NNNGATRNNN     | AGGGATAGGC     |
| M0007 |             | 0.88790 |      |     |                |                |
| 7     | V\$GATA3_01 | 4       | 3444 | (+) | NNGATARNG      | GGGATAGGC      |
| M0020 |             | 0.85865 |      |     |                |                |
| 3     | V\$GATA_C   | 2       | 3445 | (+) | NGATAAGNMNN    | GGATAGGCTAC    |
| M0020 |             | 0.83442 |      |     |                |                |
| 3     | V\$GATA_C   | 1       | 3593 | (-) | NGATAAGNMNN    | AAATTGTATCA    |
| M0012 |             | 0.80218 |      |     |                |                |
| 6     | V\$GATA1_02 | 8       | 3594 | (-) | NNNNNGATANKGNN | AATTGTATCACTGT |
| M0012 |             | 0.78270 |      |     |                |                |
| 7     | V\$GATA1_03 | 5       | 3594 | (-) | RNSNNGATAANNGN | AATTGTATCACTGT |
| M0007 |             | 0.80651 |      |     |                |                |
| 5     | V\$GATA1_01 | 5       | 3596 | (-) | SNNGATNNNN     | TTGTATCACT     |
| M0007 |             |         |      |     |                |                |
| 6     | V\$GATA2_01 | 0.80018 | 3596 | (-) | NNNGATRNNN     | TTGTATCACT     |
| M0007 |             | 0.82144 |      |     |                |                |
| 7     | V\$GATA3_01 | 4       | 3596 | (-) | NNGATARNG      | TTGTATCAC      |
| M0012 |             | 0.84713 |      |     |                |                |
| 7     | V\$GATA1_03 | 4       | 3641 | (-) | RNSNNGATAANNGN | CCTCTTTTCTGTCT |
| M0012 |             | 0.82506 |      |     |                |                |
| 8     | V\$GATA1_04 | 1       | 3641 | (-) | NNCWGATARNNNN  | CCTCTTTTCTGTC  |
| M0012 |             | 0.80867 |      |     |                |                |
| 7     | V\$GATA1_03 | 2       | 3665 | (-) | RNSNNGATAANNGN | CTGTTTACCTTCTT |
| M0007 |             | 0.80207 |      |     |                |                |
| 5     | V\$GATA1_01 | 3       | 3750 | (+) | SNNGATNNNN     | AGGGATGCAC     |
| M0007 |             | 0.82363 |      |     |                |                |
| 6     | V\$GATA2_01 | 6       | 3750 | (+) | NNNGATRNNN     | AGGGATGCAC     |
| M0007 |             | 0.80920 |      |     |                |                |
| 6     | V\$GATA2_01 | 2       | 3788 | (+) | NNNGATRNNN     | GGACATATTT     |
| M0007 |             | 0.86722 |      |     |                |                |
| 5     | V\$GATA1_01 | 6       | 3810 | (-) | SNNGATNNNN     | AGCAATCTAG     |
| M0007 |             |         |      |     |                |                |
| 6     | V\$GATA2_01 | 0.81281 | 3810 | (-) | NNNGATRNNN     | AGCAATCTAG     |
| M0007 |             | 0.82100 |      |     |                |                |
| 7     | V\$GATA3_01 | 1       | 3810 | (-) | NNGATARNG      | AGCAATCTA      |
| M0007 |             | 0.84452 |      |     |                |                |
| 5     | V\$GATA1_01 | 1       | 3851 | (-) | SNNGATNNNN     | CTAAATCTGC     |
| M0007 |             |         |      |     |                |                |
| 6     | V\$GATA2_01 | 0.82544 | 3851 | (-) | NNNGATRNNN     | CTAAATCTGC     |

|       |             |         |      |     |                |                |
|-------|-------------|---------|------|-----|----------------|----------------|
| M0007 |             | 0.84226 |      |     |                |                |
| 7     | V\$GATA3_01 | 8       | 3851 | (-) | NNGATARNG      | CTAAATCTG      |
| M0012 |             | 0.84639 |      |     |                |                |
| 7     | V\$GATA1_03 | 9       | 3872 | (+) | RNSNNGATAANNGN | AGGTAGATATTAAC |
| M0007 |             | 0.80404 |      |     |                |                |
| 5     | V\$GATA1_01 | 7       | 3874 | (+) | SNNGATNNNN     | GTAGATATTA     |
| M0007 |             | 0.79747 |      |     |                |                |
| 6     | V\$GATA2_01 | 4       | 3874 | (+) | NNNGATRNNN     | GTAGATATTA     |
| M0007 |             | 0.84226 |      |     |                |                |
| 7     | V\$GATA3_01 | 8       | 3875 | (+) | NNGATARNG      | TAGATATTA      |
| M0020 |             | 0.83193 |      |     |                |                |
| 3     | V\$GATA_C   | 5       | 3876 | (+) | NGATAAGNMNN    | AGATATTAACC    |
| M0007 |             | 0.86513 |      |     |                |                |
| 6     | V\$GATA2_01 | 3       | 3885 | (-) | NNNGATRNNN     | CCCTATGCCA     |
| M0012 |             | 0.79519 |      |     |                |                |
| 7     | V\$GATA1_03 | 8       | 3905 | (-) | RNSNNGATAANNGN | TCTGTCATCAGCTG |
| M0007 |             | 0.86327 |      |     |                |                |
| 5     | V\$GATA1_01 | 7       | 3907 | (-) | SNNGATNNNN     | TGTCATCAGC     |
| M0007 |             | 0.85160 |      |     |                |                |
| 6     | V\$GATA2_01 | 1       | 3907 | (-) | NNNGATRNNN     | TGTCATCAGC     |
| M0007 |             | 0.81638 |      |     |                |                |
| 5     | V\$GATA1_01 | 7       | 3915 | (+) | SNNGATNNNN     | GCTGTTGGTT     |
| M0012 |             | 0.80867 |      |     |                |                |
| 7     | V\$GATA1_03 | 2       | 3958 | (+) | RNSNNGATAANNGN | AAGGACATAAGATC |
| M0007 |             | 0.81145 |      |     |                |                |
| 6     | V\$GATA2_01 | 7       | 3965 | (+) | NNNGATRNNN     | TAAGATCCTA     |
| M0007 |             | 0.81461 |      |     |                |                |
| 6     | V\$GATA2_01 | 4       | 3965 | (-) | NNNGATRNNN     | TAAGATCCTA     |
| M0012 |             | 0.78466 |      |     |                |                |
| 7     | V\$GATA1_03 | 4       | 3968 | (-) | RNSNNGATAANNGN | GATCCTATGCTGCT |
| M0007 |             | 0.82318 |      |     |                |                |
| 6     | V\$GATA2_01 | 4       | 3970 | (-) | NNNGATRNNN     | TCCTATGCTG     |
| M0007 |             |         |      |     |                |                |
| 5     | V\$GATA1_01 | 0.7769  | 3976 | (+) | SNNGATNNNN     | GCTGCTGCTG     |
| M0007 |             |         |      |     |                |                |
| 5     | V\$GATA1_01 | 0.7769  | 3979 | (+) | SNNGATNNNN     | GCTGCTGCTG     |
| M0007 |             |         |      |     |                |                |
| 5     | V\$GATA1_01 | 0.7769  | 3982 | (+) | SNNGATNNNN     | GCTGCTGCTG     |
| M0007 |             | 0.81867 |      |     |                |                |
| 6     | V\$GATA2_01 | 4       | 4016 | (-) | NNNGATRNNN     | CTCTATGCGA     |
| M0007 |             | 0.79341 |      |     |                |                |
| 6     | V\$GATA2_01 | 5       | 4026 | (+) | NNNGATRNNN     | CCCCATAGAC     |
| M0007 |             | 0.82625 |      |     |                |                |
| 5     | V\$GATA1_01 | 9       | 4062 | (+) | SNNGATNNNN     | TGGGATTCTC     |
| M0007 |             | 0.86017 |      |     |                |                |
| 6     | V\$GATA2_01 | 1       | 4062 | (+) | NNNGATRNNN     | TGGGATTCTC     |
| M0007 |             | 0.78627 |      |     |                |                |
| 5     | V\$GATA1_01 | 8       | 4115 | (+) | SNNGATNNNN     | CATGAAAAGTG    |
| M0012 |             | 0.78593 |      |     |                |                |
| 6     | V\$GATA1_02 | 8       | 4119 | (+) | NNNNNGATANKGNN | AAAGTGAAAAGGGA |
| M0012 |             | 0.79519 |      |     |                |                |
| 7     | V\$GATA1_03 | 8       | 4119 | (+) | RNSNNGATAANNGN | AAAGTGAAAAGGGA |
| M0007 |             | 0.78484 |      |     |                |                |
| 6     | V\$GATA2_01 | 4       | 4147 | (-) | NNNGATRNNN     | AGTCATGTCC     |
| M0012 |             | 0.80744 |      |     |                |                |
| 7     | V\$GATA1_03 | 7       | 4158 | (-) | RNSNNGATAANNGN | ACTCCTAGCTACCC |
| M0012 |             | 0.79152 |      |     |                |                |
| 7     | V\$GATA1_03 | 4       | 4181 | (-) | RNSNNGATAANNGN | CAGCCTACCAGGCT |
| M0007 |             | 0.80503 |      |     |                |                |
| 5     | V\$GATA1_01 | 5       | 4205 | (+) | SNNGATNNNN     | TGGGATTTTC     |
| M0007 |             | 0.84889 |      |     |                |                |
| 6     | V\$GATA2_01 | 5       | 4205 | (+) | NNNGATRNNN     | TGGGATTTTC     |
| M0012 |             |         |      |     |                |                |
| 6     | V\$GATA1_02 | 0.7775  | 4239 | (-) | NNNNNGATANKGNN | GCCATTACCTTCTC |
| M0012 |             | 0.83047 |      |     |                |                |
| 7     | V\$GATA1_03 | 5       | 4239 | (-) | RNSNNGATAANNGN | GCCATTACCTTCTC |

|       |             |         |      |     |                |                |
|-------|-------------|---------|------|-----|----------------|----------------|
| M0007 |             | 0.82454 |      |     |                |                |
| 7     | V\$GATA3_01 | 6       | 4246 | (-) | NNGATARNG      | CCTTCTCTG      |
| M0007 |             | 0.84550 |      |     |                |                |
| 5     | V\$GATA1_01 | 8       | 4254 | (+) | SNNGATNNNN     | GAAGATCCTT     |
| M0007 |             | 0.85566 |      |     |                |                |
| 6     | V\$GATA2_01 | 1       | 4254 | (+) | NNNGATRNNN     | GAAGATCCTT     |
| M0007 |             |         |      |     |                |                |
| 6     | V\$GATA2_01 | 0.8083  | 4254 | (-) | NNNGATRNNN     | GAAGATCCTT     |
| M0012 |             | 0.80401 |      |     |                |                |
| 7     | V\$GATA1_03 | 8       | 4258 | (+) | RNSNNGATAANNGN | ATCCTTATAGGAGA |
| M0012 |             | 0.79103 |      |     |                |                |
| 7     | V\$GATA1_03 | 4       | 4301 | (+) | RNSNNGATAANNGN | CTAAACATAACCAG |
| M0012 |             | 0.82116 |      |     |                |                |
| 7     | V\$GATA1_03 | 6       | 4322 | (+) | RNSNNGATAANNGN | AGAATGATTATTGC |
| M0007 |             | 0.78973 |      |     |                |                |
| 5     | V\$GATA1_01 | 3       | 4324 | (+) | SNNGATNNNN     | AATGATTATT     |
| M0007 |             | 0.80198 |      |     |                |                |
| 6     | V\$GATA2_01 | 5       | 4374 | (-) | NNNGATRNNN     | AGTTATGACC     |
| M0007 |             | 0.80649 |      |     |                |                |
| 6     | V\$GATA2_01 | 5       | 4392 | (+) | NNNGATRNNN     | CAGCATATTC     |
| M0007 |             | 0.83662 |      |     |                |                |
| 5     | V\$GATA1_01 | 4       | 4432 | (-) | SNNGATNNNN     | GTCCATCTAG     |
| M0007 |             | 0.78619 |      |     |                |                |
| 6     | V\$GATA2_01 | 8       | 4432 | (-) | NNNGATRNNN     | GTCCATCTAG     |
| M0007 |             | 0.80288 |      |     |                |                |
| 6     | V\$GATA2_01 | 7       | 4446 | (-) | NNNGATRNNN     | GGCTATGGTT     |
| M0012 |             | 0.80450 |      |     |                |                |
| 7     | V\$GATA1_03 | 8       | 4492 | (+) | RNSNNGATAANNGN | GTGAAGAAAGCTGA |
| M0007 |             |         |      |     |                |                |
| 5     | V\$GATA1_01 | 0.79615 | 4516 | (+) | SNNGATNNNN     | ATAGATGCTT     |
| M0007 |             |         |      |     |                |                |
| 5     | V\$GATA1_01 | 0.79615 | 4535 | (+) | SNNGATNNNN     | GGTGTGGAG      |
| M0007 |             | 0.79911 |      |     |                |                |
| 5     | V\$GATA1_01 | 2       | 4574 | (+) | SNNGATNNNN     | GGAGATCCAA     |
| M0007 |             | 0.79386 |      |     |                |                |
| 6     | V\$GATA2_01 | 6       | 4574 | (+) | NNNGATRNNN     | GGAGATCCAA     |
| M0012 |             | 0.81553 |      |     |                |                |
| 7     | V\$GATA1_03 | 2       | 4597 | (+) | RNSNNGATAANNGN | AAGGAGATCAGCCC |
| M0007 |             | 0.83218 |      |     |                |                |
| 5     | V\$GATA1_01 | 2       | 4599 | (+) | SNNGATNNNN     | GGAGATCAGC     |
| M0007 |             | 0.85093 |      |     |                |                |
| 5     | V\$GATA1_01 | 8       | 4599 | (-) | SNNGATNNNN     | GGAGATCAGC     |
| M0007 |             | 0.84032 |      |     |                |                |
| 6     | V\$GATA2_01 | 5       | 4599 | (+) | NNNGATRNNN     | GGAGATCAGC     |
| M0007 |             | 0.85656 |      |     |                |                |
| 6     | V\$GATA2_01 | 3       | 4599 | (-) | NNNGATRNNN     | GGAGATCAGC     |
| M0020 |             | 0.84032 |      |     |                |                |
| 3     | V\$GATA_C   | 3       | 4601 | (+) | NGATAAGNMNN    | AGATCAGCCCT    |
| M0007 |             | 0.81984 |      |     |                |                |
| 5     | V\$GATA1_01 | 2       | 4611 | (+) | SNNGATNNNN     | TGGGATTTCT     |
| M0007 |             | 0.87144 |      |     |                |                |
| 6     | V\$GATA2_01 | 8       | 4611 | (+) | NNNGATRNNN     | TGGGATTTCT     |
| M0007 |             | 0.81737 |      |     |                |                |
| 5     | V\$GATA1_01 | 4       | 4630 | (+) | SNNGATNNNN     | AATGATGCTA     |
| M0007 |             | 0.80378 |      |     |                |                |
| 6     | V\$GATA2_01 | 9       | 4630 | (+) | NNNGATRNNN     | AATGATGCTA     |
| M0007 |             | 0.83662 |      |     |                |                |
| 5     | V\$GATA1_01 | 4       | 4699 | (+) | SNNGATNNNN     | TTTGATGCTG     |
| M0007 |             | 0.79747 |      |     |                |                |
| 6     | V\$GATA2_01 | 4       | 4699 | (+) | NNNGATRNNN     | TTTGATGCTG     |
| M0007 |             | 0.83020 |      |     |                |                |
| 5     | V\$GATA1_01 | 7       | 4711 | (+) | SNNGATNNNN     | AGGGATTGAG     |
| M0007 |             | 0.82949 |      |     |                |                |
| 6     | V\$GATA2_01 | 9       | 4711 | (+) | NNNGATRNNN     | AGGGATTGAG     |
| M0007 |             | 0.88037 |      |     |                |                |
| 7     | V\$GATA3_01 | 2       | 4712 | (+) | NNGATARNG      | GGGATTGAG      |

|       |             |         |      |     |                 |                |
|-------|-------------|---------|------|-----|-----------------|----------------|
| M0012 |             | 0.87016 |      |     |                 |                |
| 7     | V\$GATA1_03 | 2       | 4724 | (+) | RNSNNGATAAANNGN | AGGAGGAGAAGGGG |
| M0007 |             | 0.80207 |      |     |                 |                |
| 5     | V\$GATA1_01 | 3       | 4728 | (+) | SNNGATNNNN      | GGAGAAGGGG     |
| M0007 |             | 0.82971 |      |     |                 |                |
| 5     | V\$GATA1_01 | 4       | 4744 | (+) | SNNGATNNNN      | GAGGATGAGA     |
| M0007 |             | 0.85656 |      |     |                 |                |
| 6     | V\$GATA2_01 | 3       | 4744 | (+) | NNNGATRNNN      | GAGGATGAGA     |
| M0007 |             | 0.82055 |      |     |                 |                |
| 7     | V\$GATA3_01 | 8       | 4745 | (+) | NNGATARNG       | AGGATGAGA      |
| M0007 |             | 0.89486 |      |     |                 |                |
| 5     | V\$GATA1_01 | 7       | 4749 | (+) | SNNGATNNNN      | TGAGATGGCT     |
| M0007 |             | 0.92963 |      |     |                 |                |
| 6     | V\$GATA2_01 | 5       | 4749 | (+) | NNNGATRNNN      | TGAGATGGCT     |
| M0007 |             | 0.84271 |      |     |                 |                |
| 7     | V\$GATA3_01 | 2       | 4750 | (+) | NNGATARNG       | GAGATGGCT      |
| M0007 |             | 0.85093 |      |     |                 |                |
| 5     | V\$GATA1_01 | 8       | 4757 | (+) | SNNGATNNNN      | CTGGATGGCA     |
| M0007 |             | 0.83355 |      |     |                 |                |
| 6     | V\$GATA2_01 | 9       | 4757 | (+) | NNNGATRNNN      | CTGGATGGCA     |
| M0007 |             | 0.84600 |      |     |                 |                |
| 5     | V\$GATA1_01 | 2       | 4762 | (-) | SNNGATNNNN      | TGGCATCACT     |
| M0007 |             | 0.83085 |      |     |                 |                |
| 6     | V\$GATA2_01 | 3       | 4762 | (-) | NNNGATRNNN      | TGGCATCACT     |
| M0007 |             | 0.85143 |      |     |                 |                |
| 5     | V\$GATA1_01 | 1       | 4774 | (+) | SNNGATNNNN      | CTCGATGGAC     |
| M0007 |             |         |      |     |                 |                |
| 6     | V\$GATA2_01 | 0.78304 | 4774 | (+) | NNNGATRNNN      | CTCGATGGAC     |
| M0007 |             | 0.81490 |      |     |                 |                |
| 5     | V\$GATA1_01 | 6       | 4804 | (+) | SNNGATNNNN      | GGAGTTGGTG     |
| M0007 |             | 0.91757 |      |     |                 |                |
| 5     | V\$GATA1_01 | 2       | 4810 | (+) | SNNGATNNNN      | GGTGATGGAC     |
| M0007 |             | 0.87009 |      |     |                 |                |
| 6     | V\$GATA2_01 | 5       | 4810 | (+) | NNNGATRNNN      | GGTGATGGAC     |
| M0007 |             | 0.85644 |      |     |                 |                |
| 7     | V\$GATA3_01 | 7       | 4906 | (+) | NNGATARNG       | ATGATTAAG      |
| M0012 |             | 0.81406 |      |     |                 |                |
| 7     | V\$GATA1_03 | 2       | 4925 | (-) | RNSNNGATAAANNGN | GTGTTATTATTAT  |
| M0012 |             | 0.78833 |      |     |                 |                |
| 7     | V\$GATA1_03 | 9       | 4951 | (-) | RNSNNGATAAANNGN | ACTATTATTCTTTT |
| M0007 |             | 0.80750 |      |     |                 |                |
| 5     | V\$GATA1_01 | 2       | 4969 | (+) | SNNGATNNNN      | CCAGATGAAA     |
| M0007 |             | 0.79837 |      |     |                 |                |
| 6     | V\$GATA2_01 | 6       | 4969 | (+) | NNNGATRNNN      | CCAGATGAAA     |
| M0007 |             | 0.78035 |      |     |                 |                |
| 5     | V\$GATA1_01 | 5       | 4984 | (-) | SNNGATNNNN      | AGAGATCATT     |
| M0007 |             | 0.79070 |      |     |                 |                |
| 6     | V\$GATA2_01 | 8       | 4984 | (+) | NNNGATRNNN      | AGAGATCATT     |
| M0007 |             | 0.80514 |      |     |                 |                |
| 6     | V\$GATA2_01 | 2       | 4984 | (-) | NNNGATRNNN      | AGAGATCATT     |
| M0012 |             | 0.85399 |      |     |                 |                |
| 7     | V\$GATA1_03 | 3       | 5003 | (+) | RNSNNGATAAANNGN | AAGGAGAAAACAGG |
| M0012 |             | 0.81479 |      |     |                 |                |
| 7     | V\$GATA1_03 | 7       | 5014 | (+) | RNSNNGATAAANNGN | AGGGTGATTGAGGG |
| M0007 |             | 0.92003 |      |     |                 |                |
| 5     | V\$GATA1_01 | 9       | 5016 | (+) | SNNGATNNNN      | GGTGATTGAG     |
| M0007 |             | 0.85069 |      |     |                 |                |
| 6     | V\$GATA2_01 | 9       | 5016 | (+) | NNNGATRNNN      | GGTGATTGAG     |
| M0007 |             | 0.90208 |      |     |                 |                |
| 7     | V\$GATA3_01 | 2       | 5017 | (+) | NNGATARNG       | GTGATTGAG      |
| M0007 |             | 0.78213 |      |     |                 |                |
| 6     | V\$GATA2_01 | 8       | 5067 | (-) | NNNGATRNNN      | CTGTATGACC     |
| M0007 |             | 0.78439 |      |     |                 |                |
| 6     | V\$GATA2_01 | 3       | 5106 | (-) | NNNGATRNNN      | GTCTATGGGA     |
| M0007 |             | 0.80503 |      |     |                 |                |
| 5     | V\$GATA1_01 | 5       | 5111 | (+) | SNNGATNNNN      | TGGGATTTTC     |

|       |             |         |      |     |                |                |
|-------|-------------|---------|------|-----|----------------|----------------|
| M0007 |             | 0.84889 |      |     |                |                |
| 6     | V\$GATA2_01 | 5       | 5111 | (+) | NNNGATRNNN     | TGGGATTTTC     |
| M0007 |             | 0.78578 |      |     |                |                |
| 5     | V\$GATA1_01 | 5       | 5178 | (-) | SNNGATNNNN     | TTGCATCTCT     |
| M0007 |             |         |      |     |                |                |
| 6     | V\$GATA2_01 | 0.78304 | 5178 | (-) | NNNGATRNNN     | TTGCATCTCT     |
| M0012 |             | 0.77156 |      |     |                |                |
| 6     | V\$GATA1_02 | 2       | 5183 | (-) | NNNNNGATANKGNN | TCTCTTATGTCTCC |
| M0012 |             | 0.81430 |      |     |                |                |
| 7     | V\$GATA1_03 | 7       | 5183 | (-) | RNSNNGATAANNGN | TCTCTTATGTCTCC |
| M0012 |             | 0.79843 |      |     |                |                |
| 6     | V\$GATA1_02 | 7       | 5218 | (-) | NNNNNGATANKGNN | ACCACTAGCACCAC |
| M0012 |             | 0.79715 |      |     |                |                |
| 7     | V\$GATA1_03 | 8       | 5218 | (-) | RNSNNGATAANNGN | ACCACTAGCACCAC |
| M0007 |             | 0.81046 |      |     |                |                |
| 5     | V\$GATA1_01 | 4       | 5220 | (-) | SNNGATNNNN     | CACTAGCACC     |
| M0012 |             | 0.79519 |      |     |                |                |
| 7     | V\$GATA1_03 | 8       | 5241 | (-) | RNSNNGATAANNGN | CCAATTAGCATCTG |
| M0007 |             | 0.81737 |      |     |                |                |
| 5     | V\$GATA1_01 | 4       | 5246 | (-) | SNNGATNNNN     | TAGCATCTGT     |
| M0007 |             | 0.82318 |      |     |                |                |
| 6     | V\$GATA2_01 | 4       | 5246 | (-) | NNNGATRNNN     | TAGCATCTGT     |
| M0012 |             | 0.81862 |      |     |                |                |
| 8     | V\$GATA1_04 | 7       | 5250 | (+) | NNCWGATARNNNN  | ATCTGTAAAGCC   |
| M0012 |             | 0.82802 |      |     |                |                |
| 7     | V\$GATA1_03 | 5       | 5274 | (-) | RNSNNGATAANNGN | TCTCTAATCCTCTT |
| M0007 |             | 0.80602 |      |     |                |                |
| 5     | V\$GATA1_01 | 2       | 5276 | (-) | SNNGATNNNN     | TCTAATCCTC     |
| M0007 |             | 0.82047 |      |     |                |                |
| 6     | V\$GATA2_01 | 8       | 5276 | (-) | NNNGATRNNN     | TCTAATCCTC     |
| M0007 |             | 0.84049 |      |     |                |                |
| 7     | V\$GATA3_01 | 6       | 5276 | (-) | NNGATARNG      | TCTAATCCT      |
| M0012 |             | 0.78466 |      |     |                |                |
| 7     | V\$GATA1_03 | 4       | 5283 | (-) | RNSNNGATAANNGN | CTCTTTTCTTGAC  |
| M0007 |             | 0.88943 |      |     |                |                |
| 5     | V\$GATA1_01 | 7       | 5296 | (-) | SNNGATNNNN     | CTGCATCATC     |
| M0007 |             | 0.85340 |      |     |                |                |
| 6     | V\$GATA2_01 | 6       | 5296 | (-) | NNNGATRNNN     | CTGCATCATC     |
| M0007 |             | 0.80404 |      |     |                |                |
| 5     | V\$GATA1_01 | 7       | 5299 | (-) | SNNGATNNNN     | CATCATCTTT     |
| M0007 |             | 0.83175 |      |     |                |                |
| 6     | V\$GATA2_01 | 5       | 5299 | (-) | NNNGATRNNN     | CATCATCTTT     |
| M0007 |             | 0.87992 |      |     |                |                |
| 7     | V\$GATA3_01 | 9       | 5299 | (-) | NNGATARNG      | CATCATCTT      |
| M0007 |             | 0.79121 |      |     |                |                |
| 5     | V\$GATA1_01 | 4       | 5351 | (-) | SNNGATNNNN     | AACTTTCAGC     |
| M0012 |             | 0.79201 |      |     |                |                |
| 7     | V\$GATA1_03 | 4       | 5367 | (+) | RNSNNGATAANNGN | ATAATGATATCATC |
| M0007 |             |         |      |     |                |                |
| 5     | V\$GATA1_01 | 0.79615 | 5369 | (+) | SNNGATNNNN     | AATGATATCA     |
| M0007 |             | 0.83987 |      |     |                |                |
| 6     | V\$GATA2_01 | 4       | 5369 | (+) | NNNGATRNNN     | AATGATATCA     |
| M0007 |             | 0.82720 |      |     |                |                |
| 7     | V\$GATA3_01 | 4       | 5370 | (+) | NNGATARNG      | ATGATATCA      |
| M0007 |             | 0.86080 |      |     |                |                |
| 5     | V\$GATA1_01 | 9       | 5371 | (-) | SNNGATNNNN     | TGATATCATC     |
| M0007 |             | 0.88678 |      |     |                |                |
| 6     | V\$GATA2_01 | 4       | 5371 | (-) | NNNGATRNNN     | TGATATCATC     |
| M0007 |             | 0.82720 |      |     |                |                |
| 7     | V\$GATA3_01 | 4       | 5371 | (-) | NNGATARNG      | TGATATCAT      |
| M0007 |             | 0.79763 |      |     |                |                |
| 5     | V\$GATA1_01 | 1       | 5421 | (+) | SNNGATNNNN     | TCTGATTTAT     |
| M0007 |             | 0.78664 |      |     |                |                |
| 6     | V\$GATA2_01 | 9       | 5421 | (+) | NNNGATRNNN     | TCTGATTTAT     |
| M0007 |             |         |      |     |                |                |
| 5     | V\$GATA1_01 | 0.86229 | 5464 | (+) | SNNGATNNNN     | CCTGATTTTA     |

|       |             |         |      |     |                |                |
|-------|-------------|---------|------|-----|----------------|----------------|
| M0007 |             | 0.80604 |      |     |                |                |
| 6     | V\$GATA2_01 | 4       | 5464 | (+) | NNNGATRNNN     | CCTGATTTTA     |
| M0007 |             | 0.77245 |      |     |                |                |
| 5     | V\$GATA1_01 | 8       | 5489 | (-) | SNNGATNNNN     | AGGAATCTAT     |
| M0007 |             | 0.80799 |      |     |                |                |
| 5     | V\$GATA1_01 | 6       | 5502 | (-) | SNNGATNNNN     | ACACATCAAT     |
| M0007 |             | 0.78035 |      |     |                |                |
| 5     | V\$GATA1_01 | 5       | 5558 | (+) | SNNGATNNNN     | TTTGATTTTT     |
| M0007 |             | 0.84501 |      |     |                |                |
| 5     | V\$GATA1_01 | 5       | 5588 | (+) | SNNGATNNNN     | TGTGATTTTT     |
| M0007 |             | 0.82679 |      |     |                |                |
| 6     | V\$GATA2_01 | 3       | 5588 | (+) | NNNGATRNNN     | TGTGATTTTT     |
| M0012 |             | 0.80499 |      |     |                |                |
| 7     | V\$GATA1_03 | 8       | 5603 | (+) | RNSNNGATAANNGN | AACCAGAAAATTGA |
| M0007 |             | 0.80063 |      |     |                |                |
| 6     | V\$GATA2_01 | 1       | 5661 | (-) | NNNGATRNNN     | CACTATGAGT     |
| M0012 |             | 0.78466 |      |     |                |                |
| 7     | V\$GATA1_03 | 4       | 5717 | (-) | RNSNNGATAANNGN | ATAATTATGTTTCA |
| M0007 |             | 0.78619 |      |     |                |                |
| 6     | V\$GATA2_01 | 8       | 5719 | (-) | NNNGATRNNN     | AATTATGTTT     |
| M0012 |             | 0.78466 |      |     |                |                |
| 7     | V\$GATA1_03 | 4       | 5815 | (+) | RNSNNGATAANNGN | AAACACATAATCAA |
| M0007 |             | 0.77344 |      |     |                |                |
| 5     | V\$GATA1_01 | 5       | 5820 | (-) | SNNGATNNNN     | CATAATCAAA     |
| M0007 |             | 0.85201 |      |     |                |                |
| 7     | V\$GATA3_01 | 6       | 5820 | (-) | NNGATARNG      | CATAATCAA      |
| M0012 |             | 0.80548 |      |     |                |                |
| 7     | V\$GATA1_03 | 8       | 5864 | (-) | RNSNNGATAANNGN | ACTGGTATATTCAT |
| M0012 |             | 0.82802 |      |     |                |                |
| 7     | V\$GATA1_03 | 5       | 5940 | (-) | RNSNNGATAANNGN | ACTGTGATCCCCTT |
| M0007 |             | 0.82379 |      |     |                |                |
| 5     | V\$GATA1_01 | 1       | 5942 | (+) | SNNGATNNNN     | TGTGATCCCC     |
| M0007 |             | 0.79466 |      |     |                |                |
| 5     | V\$GATA1_01 | 9       | 5942 | (-) | SNNGATNNNN     | TGTGATCCCC     |
| M0007 |             | 0.85340 |      |     |                |                |
| 6     | V\$GATA2_01 | 6       | 5942 | (+) | NNNGATRNNN     | TGTGATCCCC     |
| M0007 |             | 0.84122 |      |     |                |                |
| 6     | V\$GATA2_01 | 7       | 5942 | (-) | NNNGATRNNN     | TGTGATCCCC     |
| M0007 |             | 0.83909 |      |     |                |                |
| 5     | V\$GATA1_01 | 2       | 5959 | (+) | SNNGATNNNN     | AATGATGGAT     |
| M0007 |             | 0.81867 |      |     |                |                |
| 6     | V\$GATA2_01 | 4       | 5959 | (+) | NNNGATRNNN     | AATGATGGAT     |
| M0012 |             | 0.79446 |      |     |                |                |
| 7     | V\$GATA1_03 | 3       | 5987 | (+) | RNSNNGATAANNGN | AGGGTGACAGTGTG |
| M0007 |             | 0.81046 |      |     |                |                |
| 5     | V\$GATA1_01 | 4       | 5989 | (+) | SNNGATNNNN     | GGTGACAGTG     |
| M0007 |             |         |      |     |                |                |
| 6     | V\$GATA2_01 | 0.79567 | 5989 | (+) | NNNGATRNNN     | GGTGACAGTG     |
| M0012 |             | 0.85105 |      |     |                |                |
| 7     | V\$GATA1_03 | 3       | 6001 | (-) | RNSNNGATAANNGN | GCACTAATCCTCAT |
| M0007 |             |         |      |     |                |                |
| 5     | V\$GATA1_01 | 0.84156 | 6003 | (-) | SNNGATNNNN     | ACTAATCCTC     |
| M0007 |             | 0.85024 |      |     |                |                |
| 6     | V\$GATA2_01 | 8       | 6003 | (-) | NNNGATRNNN     | ACTAATCCTC     |
| M0020 |             | 0.91115 |      |     |                |                |
| 3     | V\$GATA_C   | 3       | 6018 | (-) | NGATAAGNMNN    | ATCATTTATCA    |
| M0012 |             | 0.80093 |      |     |                |                |
| 6     | V\$GATA1_02 | 8       | 6019 | (-) | NNNNNGATANKGNN | TCATTTATCAGCTG |
| M0012 |             | 0.86722 |      |     |                |                |
| 7     | V\$GATA1_03 | 2       | 6019 | (-) | RNSNNGATAANNGN | TCATTTATCAGCTG |
| M0012 |             | 0.92800 |      |     |                |                |
| 8     | V\$GATA1_04 | 2       | 6019 | (-) | NNCWGATARNNNN  | TCATTTATCAGCT  |
| M0007 |             | 0.85932 |      |     |                |                |
| 5     | V\$GATA1_01 | 9       | 6021 | (-) | SNNGATNNNN     | ATTTATCAGC     |
| M0007 |             | 0.85069 |      |     |                |                |
| 6     | V\$GATA2_01 | 9       | 6021 | (-) | NNNGATRNNN     | ATTTATCAGC     |



|       |             |         |      |     |                |                |
|-------|-------------|---------|------|-----|----------------|----------------|
| M0012 |             | 0.78270 |      |     |                |                |
| 7     | V\$GATA1_03 | 5       | 6028 | (+) | RNSNNGATAANNGN | AGCTGTATAACCTT |
| M0007 |             | 0.77739 |      |     |                |                |
| 5     | V\$GATA1_01 | 4       | 6058 | (-) | SNNGATNNNN     | GTACATCATT     |
| M0012 |             | 0.81014 |      |     |                |                |
| 7     | V\$GATA1_03 | 2       | 6062 | (-) | RNSNNGATAANNGN | ATCATTTTCTTCAC |
| M0007 |             | 0.78775 |      |     |                |                |
| 5     | V\$GATA1_01 | 9       | 6108 | (+) | SNNGATNNNN     | GTTGATGAAC     |
| M0012 |             | 0.77343 |      |     |                |                |
| 6     | V\$GATA1_02 | 8       | 6152 | (+) | NNNNNGATANKGNN | TATTTGATAGCTTT |
| M0012 |             | 0.82077 |      |     |                |                |
| 8     | V\$GATA1_04 | 2       | 6153 | (+) | NNCWGATARNNNN  | ATTTGATAGCTTT  |
| M0007 |             | 0.85093 |      |     |                |                |
| 5     | V\$GATA1_01 | 8       | 6154 | (+) | SNNGATNNNN     | TTTGATAGCT     |
| M0007 |             | 0.85701 |      |     |                |                |
| 6     | V\$GATA2_01 | 4       | 6154 | (+) | NNNGATRNNN     | TTTGATAGCT     |
| M0007 |             | 0.83119 |      |     |                |                |
| 7     | V\$GATA3_01 | 2       | 6155 | (+) | NNGATARNG      | TTGATAGCT      |
| M0012 |             | 0.81185 |      |     |                |                |
| 7     | V\$GATA1_03 | 7       | 6161 | (-) | RNSNNGATAANNGN | GCTTTTATACTCAC |
| M0012 |             | 0.80450 |      |     |                |                |
| 7     | V\$GATA1_03 | 8       | 6207 | (-) | RNSNNGATAANNGN | TCCATTACCCAGAT |
| M0012 |             | 0.82116 |      |     |                |                |
| 7     | V\$GATA1_03 | 6       | 6213 | (+) | RNSNNGATAANNGN | ACCCAGATGAGAGA |
| M0007 |             | 0.85932 |      |     |                |                |
| 5     | V\$GATA1_01 | 9       | 6215 | (+) | SNNGATNNNN     | CCAGATGAGA     |
| M0007 |             | 0.84483 |      |     |                |                |
| 6     | V\$GATA2_01 | 5       | 6215 | (+) | NNNGATRNNN     | CCAGATGAGA     |
| M0007 |             | 0.85999 |      |     |                |                |
| 7     | V\$GATA3_01 | 1       | 6216 | (+) | NNGATARNG      | CAGATGAGA      |
| M0007 |             | 0.79837 |      |     |                |                |
| 6     | V\$GATA2_01 | 6       | 6262 | (+) | NNNGATRNNN     | GACCATACCA     |
| M0007 |             | 0.84032 |      |     |                |                |
| 6     | V\$GATA2_01 | 5       | 6269 | (+) | NNNGATRNNN     | CCACATAGTT     |
| M0012 |             | 0.79062 |      |     |                |                |
| 6     | V\$GATA1_02 | 5       | 6298 | (+) | NNNNNGATANKGNN | TTAAAAATAAGGAT |
| M0020 |             | 0.83473 |      |     |                |                |
| 3     | V\$GATA_C   | 1       | 6302 | (+) | NGATAAGNMNN    | AAATAAGGATT    |
| M0007 |             | 0.80651 |      |     |                |                |
| 5     | V\$GATA1_01 | 5       | 6306 | (+) | SNNGATNNNN     | AAGGATTTGG     |
| M0007 |             | 0.83130 |      |     |                |                |
| 6     | V\$GATA2_01 | 4       | 6306 | (+) | NNNGATRNNN     | AAGGATTTGG     |
| M0007 |             | 0.84359 |      |     |                |                |
| 7     | V\$GATA3_01 | 8       | 6307 | (+) | NNGATARNG      | AGGATTTGG      |
| M0007 |             | 0.79747 |      |     |                |                |
| 6     | V\$GATA2_01 | 4       | 6314 | (+) | NNNGATRNNN     | GGGGACAGCA     |
| M0007 |             | 0.78664 |      |     |                |                |
| 6     | V\$GATA2_01 | 9       | 6354 | (+) | NNNGATRNNN     | TAACATATTT     |
| M0020 |             | 0.90897 |      |     |                |                |
| 3     | V\$GATA_C   | 8       | 6357 | (-) | NGATAAGNMNN    | CATATTTATCT    |
| M0012 |             |         |      |     |                |                |
| 8     | V\$GATA1_04 | 0.89185 | 6358 | (-) | NNCWGATARNNNN  | ATATTTATCTAAT  |
| M0007 |             | 0.82233 |      |     |                |                |
| 7     | V\$GATA3_01 | 1       | 6360 | (-) | NNGATARNG      | ATTTATCTA      |
| M0012 |             |         |      |     |                |                |
| 8     | V\$GATA1_04 | 0.8125  | 6370 | (+) | NNCWGATARNNNN  | TTGTGATATTAA   |
| M0007 |             | 0.86870 |      |     |                |                |
| 5     | V\$GATA1_01 | 7       | 6371 | (+) | SNNGATNNNN     | TGTGATATTT     |
| M0007 |             | 0.89129 |      |     |                |                |
| 6     | V\$GATA2_01 | 5       | 6371 | (+) | NNNGATRNNN     | TGTGATATTT     |
| M0007 |             | 0.82853 |      |     |                |                |
| 7     | V\$GATA3_01 | 3       | 6372 | (+) | NNGATARNG      | GTGATATTT      |
| M0007 |             | 0.85932 |      |     |                |                |
| 5     | V\$GATA1_01 | 9       | 6402 | (+) | SNNGATNNNN     | GAAGATTGAT     |
| M0007 |             | 0.84077 |      |     |                |                |
| 6     | V\$GATA2_01 | 6       | 6402 | (+) | NNNGATRNNN     | GAAGATTGAT     |

|       |             |         |      |     |                |                |
|-------|-------------|---------|------|-----|----------------|----------------|
| M0007 |             | 0.84138 |      |     |                |                |
| 7     | V\$GATA3_01 | 2       | 6403 | (+) | NNGATARNG      | AAGATTGAT      |
| M0007 |             | 0.81885 |      |     |                |                |
| 5     | V\$GATA1_01 | 5       | 6406 | (+) | SNNGATNNNN     | ATTGATTGTT     |
| M0007 |             | 0.88598 |      |     |                |                |
| 5     | V\$GATA1_01 | 2       | 6460 | (+) | SNNGATNNNN     | CTTGATGCCT     |
| M0007 |             | 0.81235 |      |     |                |                |
| 6     | V\$GATA2_01 | 9       | 6460 | (+) | NNNGATRNNN     | CTTGATGCCT     |
| M0012 |             | 0.80720 |      |     |                |                |
| 7     | V\$GATA1_03 | 2       | 6477 | (+) | RNSNNGATAANNGN | CTCAAGATTACCAC |
| M0007 |             | 0.82329 |      |     |                |                |
| 5     | V\$GATA1_01 | 7       | 6479 | (+) | SNNGATNNNN     | CAAGATTACC     |
| M0007 |             | 0.83942 |      |     |                |                |
| 6     | V\$GATA2_01 | 3       | 6479 | (+) | NNNGATRNNN     | CAAGATTACC     |
| M0012 |             | 0.78270 |      |     |                |                |
| 7     | V\$GATA1_03 | 5       | 6480 | (-) | RNSNNGATAANNGN | AAGATTACCACCTT |
| M0012 |             | 0.80769 |      |     |                |                |
| 7     | V\$GATA1_03 | 2       | 6496 | (+) | RNSNNGATAANNGN | ACCAAGAGAAGTAG |
| M0007 |             | 0.79318 |      |     |                |                |
| 5     | V\$GATA1_01 | 9       | 6648 | (-) | SNNGATNNNN     | TGAAATCAGT     |
| M0007 |             | 0.78349 |      |     |                |                |
| 6     | V\$GATA2_01 | 1       | 6648 | (-) | NNNGATRNNN     | TGAAATCAGT     |
| M0020 |             | 0.84653 |      |     |                |                |
| 3     | V\$GATA_C   | 6       | 6661 | (-) | NGATAAGNMNN    | GACTATTATCC    |
| M0012 |             | 0.80843 |      |     |                |                |
| 6     | V\$GATA1_02 | 8       | 6662 | (-) | NNNNNGATANKGN  | ACTATTATCCAAAG |
| M0012 |             | 0.80181 |      |     |                |                |
| 7     | V\$GATA1_03 | 3       | 6662 | (-) | RNSNNGATAANNGN | ACTATTATCCAAAG |
| M0007 |             | 0.78258 |      |     |                |                |
| 6     | V\$GATA2_01 | 9       | 6664 | (-) | NNNGATRNNN     | TATTATCCAA     |
| M0007 |             | 0.82897 |      |     |                |                |
| 7     | V\$GATA3_01 | 7       | 6664 | (-) | NNGATARNG      | TATTATCCA      |
| M0012 |             | 0.78417 |      |     |                |                |
| 7     | V\$GATA1_03 | 4       | 6679 | (-) | RNSNNGATAANNGN | GTACCTACCACTCT |
| M0007 |             | 0.84501 |      |     |                |                |
| 5     | V\$GATA1_01 | 5       | 6725 | (-) | SNNGATNNNN     | TGAAATCTCC     |
| M0007 |             | 0.84167 |      |     |                |                |
| 6     | V\$GATA2_01 | 8       | 6725 | (-) | NNNGATRNNN     | TGAAATCTCC     |
| M0007 |             | 0.83429 |      |     |                |                |
| 7     | V\$GATA3_01 | 3       | 6725 | (-) | NNGATARNG      | TGAAATCTC      |
| M0007 |             |         |      |     |                |                |
| 5     | V\$GATA1_01 | 0.86229 | 6739 | (+) | SNNGATNNNN     | CCTGATTICA     |
| M0007 |             | 0.82498 |      |     |                |                |
| 6     | V\$GATA2_01 | 9       | 6739 | (+) | NNNGATRNNN     | CCTGATTICA     |
| M0007 |             | 0.80157 |      |     |                |                |
| 5     | V\$GATA1_01 | 9       | 6757 | (+) | SNNGATNNNN     | TCTGATTICA     |
| M0007 |             | 0.81596 |      |     |                |                |
| 6     | V\$GATA2_01 | 8       | 6757 | (+) | NNNGATRNNN     | TCTGATTICA     |
| M0007 |             | 0.78726 |      |     |                |                |
| 5     | V\$GATA1_01 | 6       | 6776 | (+) | SNNGATNNNN     | GAAGTTGGGT     |
| M0007 |             | 0.78282 |      |     |                |                |
| 5     | V\$GATA1_01 | 3       | 6791 | (-) | SNNGATNNNN     | AGAAATCCTT     |
| M0007 |             | 0.83085 |      |     |                |                |
| 6     | V\$GATA2_01 | 3       | 6791 | (-) | NNNGATRNNN     | AGAAATCCTT     |
| M0020 |             | 0.83069 |      |     |                |                |
| 3     | V\$GATA_C   | 3       | 6843 | (-) | NGATAAGNMNN    | ATTCTTAAC      |
| M0007 |             | 0.83711 |      |     |                |                |
| 5     | V\$GATA1_01 | 7       | 6864 | (+) | SNNGATNNNN     | GAAGATTTTC     |
| M0007 |             | 0.84077 |      |     |                |                |
| 6     | V\$GATA2_01 | 6       | 6864 | (+) | NNNGATRNNN     | GAAGATTTTC     |
| M0012 |             | 0.78564 |      |     |                |                |
| 7     | V\$GATA1_03 | 4       | 6865 | (-) | RNSNNGATAANNGN | AAGATTTTCTTCT  |
| M0012 |             | 0.78515 |      |     |                |                |
| 7     | V\$GATA1_03 | 4       | 6871 | (-) | RNSNNGATAANNGN | TTCTTTCTCTTCAC |
| M0012 |             | 0.90568 |      |     |                |                |
| 7     | V\$GATA1_03 | 3       | 6904 | (+) | RNSNNGATAANNGN | AGGAGGATAATTCA |

|       |             |         |      |     |                |                |
|-------|-------------|---------|------|-----|----------------|----------------|
| M0007 |             | 0.85291 |      |     |                |                |
| 5     | V\$GATA1_01 | 2       | 6906 | (+) | SNNGATNNNN     | GAGGATAATT     |
| M0007 |             | 0.90843 |      |     |                |                |
| 6     | V\$GATA2_01 | 5       | 6906 | (+) | NNNGATRNNN     | GAGGATAATT     |
| M0007 |             | 0.82144 |      |     |                |                |
| 7     | V\$GATA3_01 | 4       | 6907 | (+) | NNGATARNG      | AGGATAATT      |
| M0020 |             | 0.89375 |      |     |                |                |
| 3     | V\$GATA_C   | 6       | 6908 | (+) | NGATAAGNMNN    | GGATAATTCAT    |
| M0007 |             |         |      |     |                |                |
| 5     | V\$GATA1_01 | 0.78233 | 6913 | (-) | SNNGATNNNN     | ATTCATCATA     |
| M0007 |             | 0.79972 |      |     |                |                |
| 6     | V\$GATA2_01 | 9       | 6913 | (-) | NNNGATRNNN     | ATTCATCATA     |
| M0012 |             | 0.80205 |      |     |                |                |
| 7     | V\$GATA1_03 | 8       | 6927 | (+) | RNSNNGATAANNGN | ACAATTATAACTGG |
| M0012 |             | 0.78833 |      |     |                |                |
| 7     | V\$GATA1_03 | 9       | 6935 | (+) | RNSNNGATAANNGN | AACTGGATTATGGA |
| M0007 |             | 0.80898 |      |     |                |                |
| 5     | V\$GATA1_01 | 3       | 6937 | (+) | SNNGATNNNN     | CTGGATTATG     |
| M0007 |             | 0.83030 |      |     |                |                |
| 7     | V\$GATA3_01 | 6       | 6938 | (+) | NNGATARNG      | TGGATTATG      |
| M0007 |             |         |      |     |                |                |
| 5     | V\$GATA1_01 | 0.80306 | 6974 | (+) | SNNGATNNNN     | CAGGATGAAC     |
| M0007 |             | 0.83085 |      |     |                |                |
| 6     | V\$GATA2_01 | 3       | 6974 | (+) | NNNGATRNNN     | CAGGATGAAC     |
| M0007 |             |         |      |     |                |                |
| 5     | V\$GATA1_01 | 0.78233 | 6986 | (+) | SNNGATNNNN     | CAGGATAAAA     |
| M0007 |             | 0.83310 |      |     |                |                |
| 6     | V\$GATA2_01 | 8       | 6986 | (+) | NNNGATRNNN     | CAGGATAAAA     |
| M0007 |             | 0.83340 |      |     |                |                |
| 7     | V\$GATA3_01 | 7       | 6987 | (+) | NNGATARNG      | AGGATAAAA      |
| M0020 |             | 0.89810 |      |     |                |                |
| 3     | V\$GATA_C   | 5       | 6988 | (+) | NGATAAGNMNN    | GGATAAAATCC    |
| M0007 |             | 0.77591 |      |     |                |                |
| 5     | V\$GATA1_01 | 3       | 6991 | (-) | SNNGATNNNN     | TAAAATCCAC     |
| M0012 |             | 0.80406 |      |     |                |                |
| 6     | V\$GATA1_02 | 2       | 7023 | (-) | NNNNNGATANKGNN | TAGTCTATCCCTTC |
| M0012 |             | 0.79789 |      |     |                |                |
| 7     | V\$GATA1_03 | 3       | 7023 | (-) | RNSNNGATAANNGN | TAGTCTATCCCTTC |
| M0007 |             | 0.82773 |      |     |                |                |
| 5     | V\$GATA1_01 | 9       | 7025 | (-) | SNNGATNNNN     | GTCTATCCCT     |
| M0007 |             | 0.87731 |      |     |                |                |
| 6     | V\$GATA2_01 | 2       | 7025 | (-) | NNNGATRNNN     | GTCTATCCCT     |
| M0007 |             | 0.84714 |      |     |                |                |
| 7     | V\$GATA3_01 | 2       | 7025 | (-) | NNGATARNG      | GTCTATCCC      |
| M0007 |             | 0.87956 |      |     |                |                |
| 5     | V\$GATA1_01 | 6       | 7042 | (-) | SNNGATNNNN     | GCCCATCCCT     |
| M0007 |             | 0.89535 |      |     |                |                |
| 6     | V\$GATA2_01 | 4       | 7042 | (-) | NNNGATRNNN     | GCCCATCCCT     |
| M0007 |             | 0.83429 |      |     |                |                |
| 7     | V\$GATA3_01 | 3       | 7042 | (-) | NNGATARNG      | GCCCATCCC      |
| M0012 |             | 0.81014 |      |     |                |                |
| 7     | V\$GATA1_03 | 2       | 7046 | (-) | RNSNNGATAANNGN | ATCCCTAACAGCCT |
| M0012 |             | 0.81219 |      |     |                |                |
| 8     | V\$GATA1_04 | 4       | 7046 | (-) | NNCWGATARNNNN  | ATCCCTAACAGCC  |
| M0007 |             | 0.84007 |      |     |                |                |
| 5     | V\$GATA1_01 | 9       | 7048 | (-) | SNNGATNNNN     | CCCTAACAGC     |
| M0007 |             | 0.80198 |      |     |                |                |
| 6     | V\$GATA2_01 | 5       | 7048 | (-) | NNNGATRNNN     | CCCTAACAGC     |
| M0007 |             | 0.87561 |      |     |                |                |
| 5     | V\$GATA1_01 | 7       | 7066 | (-) | SNNGATNNNN     | AAACATCCTG     |
| M0007 |             |         |      |     |                |                |
| 6     | V\$GATA2_01 | 0.88949 | 7066 | (-) | NNNGATRNNN     | AAACATCCTG     |
| M0007 |             | 0.78394 |      |     |                |                |
| 6     | V\$GATA2_01 | 2       | 7150 | (-) | NNNGATRNNN     | GACTATGGTT     |
| M0012 |             | 0.78466 |      |     |                |                |
| 7     | V\$GATA1_03 | 4       | 7185 | (-) | RNSNNGATAANNGN | CTAAATATCCAGTT |

|       |             |         |      |     |                |                |
|-------|-------------|---------|------|-----|----------------|----------------|
| M0007 |             | 0.83958 |      |     |                |                |
| 5     | V\$GATA1_01 | 5       | 7187 | (-) | SNNGATNNNN     | AAATATCCAG     |
| M0007 |             | 0.83626 |      |     |                |                |
| 6     | V\$GATA2_01 | 5       | 7187 | (-) | NNNGATRNNN     | AAATATCCAG     |
| M0007 |             | 0.86377 |      |     |                |                |
| 5     | V\$GATA1_01 | 1       | 7232 | (+) | SNNGATNNNN     | ACTGATGTTG     |
| M0007 |             | 0.84348 |      |     |                |                |
| 6     | V\$GATA2_01 | 2       | 7232 | (+) | NNNGATRNNN     | ACTGATGTTG     |
| M0012 |             | 0.80573 |      |     |                |                |
| 7     | V\$GATA1_03 | 2       | 7236 | (+) | RNSNNGATAANNGN | ATGTTGAAAAGCTG |
| M0007 |             | 0.77492 |      |     |                |                |
| 5     | V\$GATA1_01 | 6       | 7309 | (-) | SNNGATNNNN     | AACCGTCATG     |
| M0007 |             | 0.84049 |      |     |                |                |
| 7     | V\$GATA3_01 | 6       | 7341 | (-) | NNGATARNG      | CCCTTTCTC      |
| M0012 |             | 0.82165 |      |     |                |                |
| 7     | V\$GATA1_03 | 6       | 7341 | (-) | RNSNNGATAANNGN | CCCTTTCTCAGCCC |
| M0012 |             | 0.81096 |      |     |                |                |
| 8     | V\$GATA1_04 | 8       | 7341 | (-) | NNCWGATARNNNN  | CCCTTTCTCAGCC  |
| M0012 |             | 0.79093 |      |     |                |                |
| 6     | V\$GATA1_02 | 7       | 7389 | (+) | NNNNNGATANKGNN | AGAGAGATATGCCC |
| M0012 |             | 0.81847 |      |     |                |                |
| 7     | V\$GATA1_03 | 1       | 7389 | (+) | RNSNNGATAANNGN | AGAGAGATATGCCC |
| M0012 |             | 0.86090 |      |     |                |                |
| 8     | V\$GATA1_04 | 7       | 7390 | (+) | NNCWGATARNNNN  | GAGAGATATGCCC  |
| M0007 |             | 0.83711 |      |     |                |                |
| 5     | V\$GATA1_01 | 7       | 7391 | (+) | SNNGATNNNN     | AGAGATATGC     |
| M0007 |             | 0.87280 |      |     |                |                |
| 6     | V\$GATA2_01 | 1       | 7391 | (+) | NNNGATRNNN     | AGAGATATGC     |
| M0007 |             |         |      |     |                |                |
| 7     | V\$GATA3_01 | 0.87284 | 7392 | (+) | NNGATARNG      | GAGATATGC      |
| M0007 |             |         |      |     |                |                |
| 6     | V\$GATA2_01 | 0.84258 | 7393 | (-) | NNNGATRNNN     | AGATATGCCC     |
| M0020 |             | 0.90556 |      |     |                |                |
| 3     | V\$GATA_C   | 1       | 7393 | (+) | NGATAAGNMNN    | AGATATGCCCA    |
| M0007 |             | 0.88400 |      |     |                |                |
| 5     | V\$GATA1_01 | 8       | 7399 | (-) | SNNGATNNNN     | GCCCATCCAG     |
| M0007 |             | 0.84709 |      |     |                |                |
| 6     | V\$GATA2_01 | 1       | 7399 | (-) | NNNGATRNNN     | GCCCATCCAG     |
| M0020 |             | 0.84467 |      |     |                |                |
| 3     | V\$GATA_C   | 2       | 7438 | (-) | NGATAAGNMNN    | TGGTCCTGTCC    |
| M0007 |             | 0.86080 |      |     |                |                |
| 5     | V\$GATA1_01 | 9       | 7503 | (+) | SNNGATNNNN     | TCTGATGTTT     |
| M0007 |             | 0.86287 |      |     |                |                |
| 6     | V\$GATA2_01 | 8       | 7503 | (+) | NNNGATRNNN     | TCTGATGTTT     |
| M0012 |             | 0.82291 |      |     |                |                |
| 8     | V\$GATA1_04 | 7       | 7513 | (+) | NNCWGATARNNNN  | GTATGATATTTGA  |
| M0007 |             | 0.84007 |      |     |                |                |
| 5     | V\$GATA1_01 | 9       | 7514 | (+) | SNNGATNNNN     | TATGATATTT     |
| M0007 |             | 0.88317 |      |     |                |                |
| 6     | V\$GATA2_01 | 5       | 7514 | (+) | NNNGATRNNN     | TATGATATTT     |
| M0007 |             | 0.77196 |      |     |                |                |
| 5     | V\$GATA1_01 | 4       | 7545 | (-) | SNNGATNNNN     | AAAAATCAAT     |
| M0007 |             | 0.82408 |      |     |                |                |
| 6     | V\$GATA2_01 | 7       | 7573 | (+) | NNNGATRNNN     | AAGCATAGCT     |
| M0007 |             |         |      |     |                |                |
| 6     | V\$GATA2_01 | 0.78304 | 7582 | (+) | NNNGATRNNN     | TGAGATTAAT     |
| M0007 |             | 0.83030 |      |     |                |                |
| 7     | V\$GATA3_01 | 6       | 7583 | (+) | NNGATARNG      | GAGATTAAT      |
| M0007 |             | 0.81441 |      |     |                |                |
| 5     | V\$GATA1_01 | 3       | 7589 | (+) | SNNGATNNNN     | AATGATTCTC     |
| M0007 |             | 0.79386 |      |     |                |                |
| 6     | V\$GATA2_01 | 6       | 7589 | (+) | NNNGATRNNN     | AATGATTCTC     |
| M0012 |             | 0.82386 |      |     |                |                |
| 7     | V\$GATA1_03 | 1       | 7590 | (-) | RNSNNGATAANNGN | ATGATTCTCAGCAT |
| M0012 |             | 0.78270 |      |     |                |                |
| 7     | V\$GATA1_03 | 5       | 7621 | (+) | RNSNNGATAANNGN | AGCTGGAAAACCTT |

|       |             |         |      |     |                |                |
|-------|-------------|---------|------|-----|----------------|----------------|
| M0007 |             | 0.79911 |      |     |                |                |
| 5     | V\$GATA1_01 | 2       | 7629 | (-) | SNNGATNNNN     | AACCTTCACC     |
| M0007 |             | 0.81391 |      |     |                |                |
| 5     | V\$GATA1_01 | 9       | 7651 | (+) | SNNGATNNNN     | CCAGATCTCA     |
| M0007 |             | 0.82033 |      |     |                |                |
| 5     | V\$GATA1_01 | 6       | 7651 | (-) | SNNGATNNNN     | CCAGATCTCA     |
| M0007 |             | 0.83626 |      |     |                |                |
| 6     | V\$GATA2_01 | 5       | 7651 | (+) | NNNGATRNNN     | CCAGATCTCA     |
| M0007 |             | 0.85746 |      |     |                |                |
| 6     | V\$GATA2_01 | 5       | 7651 | (-) | NNNGATRNNN     | CCAGATCTCA     |
| M0007 |             | 0.82410 |      |     |                |                |
| 7     | V\$GATA3_01 | 3       | 7651 | (-) | NNGATARNG      | CCAGATCTC      |
| M0007 |             | 0.91312 |      |     |                |                |
| 5     | V\$GATA1_01 | 9       | 7679 | (+) | SNNGATNNNN     | GGAGATTCTG     |
| M0007 |             | 0.87686 |      |     |                |                |
| 6     | V\$GATA2_01 | 1       | 7679 | (+) | NNNGATRNNN     | GGAGATTCTG     |
| M0007 |             | 0.86619 |      |     |                |                |
| 7     | V\$GATA3_01 | 4       | 7680 | (+) | NNGATARNG      | GAGATTCTG      |
| M0012 |             | 0.80187 |      |     |                |                |
| 6     | V\$GATA1_02 | 5       | 7731 | (-) | NNNNNGATANKGNN | AATAATATCATGGA |
| M0007 |             | 0.86525 |      |     |                |                |
| 5     | V\$GATA1_01 | 2       | 7733 | (-) | SNNGATNNNN     | TAATATCATG     |
| M0007 |             | 0.86242 |      |     |                |                |
| 6     | V\$GATA2_01 | 7       | 7733 | (-) | NNNGATRNNN     | TAATATCATG     |
| M0007 |             | 0.84315 |      |     |                |                |
| 7     | V\$GATA3_01 | 5       | 7733 | (-) | NNGATARNG      | TAATATCAT      |
| M0007 |             | 0.83562 |      |     |                |                |
| 7     | V\$GATA3_01 | 3       | 7773 | (+) | NNGATARNG      | TAGATGAAG      |
| M0007 |             | 0.79417 |      |     |                |                |
| 5     | V\$GATA1_01 | 6       | 7775 | (+) | SNNGATNNNN     | GATGAAGGGG     |
| M0007 |             | 0.82971 |      |     |                |                |
| 5     | V\$GATA1_01 | 4       | 7781 | (+) | SNNGATNNNN     | GGGGATTAAG     |
| M0007 |             | 0.82498 |      |     |                |                |
| 6     | V\$GATA2_01 | 9       | 7781 | (+) | NNNGATRNNN     | GGGGATTAAG     |
| M0007 |             | 0.85201 |      |     |                |                |
| 7     | V\$GATA3_01 | 6       | 7782 | (+) | NNGATARNG      | GGGATTAAG      |
| M0012 |             | 0.81843 |      |     |                |                |
| 6     | V\$GATA1_02 | 8       | 7811 | (+) | NNNNNGATANKGNN | AACTTGATAATCTC |
| M0012 |             | 0.87922 |      |     |                |                |
| 7     | V\$GATA1_03 | 6       | 7811 | (+) | RNSNNGATAANNGN | AACTTGATAATCTC |
| M0007 |             | 0.83168 |      |     |                |                |
| 5     | V\$GATA1_01 | 8       | 7813 | (+) | SNNGATNNNN     | CTTGATAATC     |
| M0007 |             | 0.79206 |      |     |                |                |
| 6     | V\$GATA2_01 | 1       | 7813 | (+) | NNNGATRNNN     | CTTGATAATC     |
| M0020 |             | 0.84995 |      |     |                |                |
| 3     | V\$GATA_C   | 3       | 7815 | (+) | NGATAAGNMNN    | TGATAATCTCA    |
| M0007 |             | 0.79121 |      |     |                |                |
| 5     | V\$GATA1_01 | 4       | 7816 | (-) | SNNGATNNNN     | GATAATCTCA     |
| M0007 |             | 0.81957 |      |     |                |                |
| 6     | V\$GATA2_01 | 6       | 7816 | (-) | NNNGATRNNN     | GATAATCTCA     |
| M0007 |             | 0.85024 |      |     |                |                |
| 7     | V\$GATA3_01 | 4       | 7816 | (-) | NNGATARNG      | GATAATCTC      |
| M0007 |             | 0.85686 |      |     |                |                |
| 5     | V\$GATA1_01 | 1       | 7918 | (-) | SNNGATNNNN     | TCACATCTTG     |
| M0007 |             | 0.85160 |      |     |                |                |
| 6     | V\$GATA2_01 | 1       | 7918 | (-) | NNNGATRNNN     | TCACATCTTG     |
| M0007 |             |         |      |     |                |                |
| 7     | V\$GATA3_01 | 0.83385 | 7918 | (-) | NNGATARNG      | TCACATCTT      |
| M0012 |             | 0.77093 |      |     |                |                |
| 6     | V\$GATA1_02 | 8       | 7928 | (+) | NNNNNGATANKGNN | TTTTTGATATATGA |
| M0007 |             | 0.79206 |      |     |                |                |
| 6     | V\$GATA2_01 | 1       | 7940 | (+) | NNNGATRNNN     | GAGCATATGA     |
| M0007 |             | 0.79521 |      |     |                |                |
| 6     | V\$GATA2_01 | 9       | 7942 | (-) | NNNGATRNNN     | GCATATGAGG     |
| M0007 |             |         |      |     |                |                |
| 5     | V\$GATA1_01 | 0.8692  | 7961 | (+) | SNNGATNNNN     | TGAGATGCTT     |

|       |             |         |      |     |                 |                |
|-------|-------------|---------|------|-----|-----------------|----------------|
| M0007 |             | 0.88543 |      |     |                 |                |
| 6     | V\$GATA2_01 | 1       | 7961 | (+) | NNNGATRNNN      | TGAGATGCTT     |
| M0007 |             | 0.81194 |      |     |                 |                |
| 5     | V\$GATA1_01 | 5       | 8065 | (+) | SNNGATNNNN      | GAGGATTTCa     |
| M0007 |             | 0.84799 |      |     |                 |                |
| 6     | V\$GATA2_01 | 3       | 8065 | (+) | NNNGATRNNN      | GAGGATTTCa     |
| M0007 |             | 0.83909 |      |     |                 |                |
| 5     | V\$GATA1_01 | 2       | 8111 | (+) | SNNGATNNNN      | GGAGATTAGA     |
| M0007 |             | 0.81416 |      |     |                 |                |
| 6     | V\$GATA2_01 | 3       | 8111 | (+) | NNNGATRNNN      | GGAGATTAGA     |
| M0007 |             | 0.90296 |      |     |                 |                |
| 7     | V\$GATA3_01 | 9       | 8112 | (+) | NNGATARNG       | GAGATTAGA      |
| M0007 |             | 0.78282 |      |     |                 |                |
| 5     | V\$GATA1_01 | 3       | 8126 | (+) | SNNGATNNNN      | ACTGATCATT     |
| M0007 |             | 0.77443 |      |     |                 |                |
| 5     | V\$GATA1_01 | 2       | 8126 | (-) | SNNGATNNNN      | ACTGATCATT     |
| M0020 |             | 0.84280 |      |     |                 |                |
| 3     | V\$GATA_C   | 8       | 8141 | (-) | NGATAAGNMNN     | AGTTAATATCT    |
| M0012 |             | 0.80812 |      |     |                 |                |
| 6     | V\$GATA1_02 | 5       | 8142 | (-) | NNNNNGATANKGNN  | GTTAATATCTTTTA |
| M0012 |             | 0.84589 |      |     |                 |                |
| 8     | V\$GATA1_04 | 5       | 8142 | (-) | NNCWGATARNNNN   | GTTAATATCTTTT  |
| M0007 |             |         |      |     |                 |                |
| 5     | V\$GATA1_01 | 0.77542 | 8144 | (-) | SNNGATNNNN      | TAATATCTTT     |
| M0007 |             | 0.83220 |      |     |                 |                |
| 6     | V\$GATA2_01 | 6       | 8144 | (-) | NNNGATRNNN      | TAATATCTTT     |
| M0007 |             | 0.86663 |      |     |                 |                |
| 7     | V\$GATA3_01 | 7       | 8144 | (-) | NNGATARNG       | TAATATCTT      |
| M0012 |             | 0.81343 |      |     |                 |                |
| 6     | V\$GATA1_02 | 8       | 8166 | (+) | NNNNNGATANKGNN  | TCCTGGATAAGACC |
| M0007 |             | 0.79812 |      |     |                 |                |
| 5     | V\$GATA1_01 | 4       | 8168 | (+) | SNNGATNNNN      | CTGGATAAGA     |
| M0007 |             | 0.79792 |      |     |                 |                |
| 6     | V\$GATA2_01 | 5       | 8168 | (+) | NNNGATRNNN      | CTGGATAAGA     |
| M0007 |             | 0.84980 |      |     |                 |                |
| 7     | V\$GATA3_01 | 1       | 8169 | (+) | NNGATARNG       | TGGATAAGA      |
| M0020 |             | 0.96831 |      |     |                 |                |
| 3     | V\$GATA_C   | 3       | 8170 | (+) | NGATAAGNMNN     | GGATAAGACCC    |
| M0020 |             | 0.89127 |      |     |                 |                |
| 3     | V\$GATA_C   | 1       | 8190 | (-) | NGATAAGNMNN     | AATTTCTATCA    |
| M0012 |             | 0.82062 |      |     |                 |                |
| 6     | V\$GATA1_02 | 5       | 8191 | (-) | NNNNNGATANKGNN  | ATTTCTATCAGTAT |
| M0012 |             | 0.84884 |      |     |                 |                |
| 7     | V\$GATA1_03 | 9       | 8191 | (-) | RNSNNGATAANNNGN | ATTTCTATCAGTAT |
| M0012 |             | 0.91023 |      |     |                 |                |
| 8     | V\$GATA1_04 | 3       | 8191 | (-) | NNCWGATARNNNN   | ATTTCTATCAGTA  |
| M0007 |             | 0.82428 |      |     |                 |                |
| 5     | V\$GATA1_01 | 4       | 8193 | (-) | SNNGATNNNN      | TTCTATCAGT     |
| M0007 |             |         |      |     |                 |                |
| 6     | V\$GATA2_01 | 0.82544 | 8193 | (-) | NNNGATRNNN      | TTCTATCAGT     |
| M0007 |             | 0.87771 |      |     |                 |                |
| 7     | V\$GATA3_01 | 4       | 8193 | (-) | NNGATARNG       | TTCTATCAG      |
| M0012 |             | 0.79519 |      |     |                 |                |
| 7     | V\$GATA1_03 | 8       | 8197 | (+) | RNSNNGATAANNNGN | ATCAGTATACCAGC |
| M0007 |             | 0.78134 |      |     |                 |                |
| 5     | V\$GATA1_01 | 3       | 8213 | (+) | SNNGATNNNN      | AAAGATTAGT     |
| M0007 |             | 0.78890 |      |     |                 |                |
| 6     | V\$GATA2_01 | 4       | 8213 | (+) | NNNGATRNNN      | AAAGATTAGT     |
| M0007 |             | 0.85378 |      |     |                 |                |
| 7     | V\$GATA3_01 | 8       | 8214 | (+) | NNGATARNG       | AAGATTAGT      |
| M0007 |             |         |      |     |                 |                |
| 5     | V\$GATA1_01 | 0.82922 | 8238 | (+) | SNNGATNNNN      | AGTGATTGAC     |
| M0007 |             |         |      |     |                 |                |
| 6     | V\$GATA2_01 | 0.7871  | 8238 | (+) | NNNGATRNNN      | AGTGATTGAC     |
| M0007 |             | 0.83517 |      |     |                 |                |
| 7     | V\$GATA3_01 | 9       | 8239 | (+) | NNGATARNG       | GTGATTGAC      |

|       |             |         |      |     |                |                |
|-------|-------------|---------|------|-----|----------------|----------------|
| M0012 |             | 0.78882 |      |     |                |                |
| 7     | V\$GATA1_03 | 9       | 8246 | (-) | RNSNNGATAANNGN | ACTGTTATTTACTG |
| M0020 |             | 0.88878 |      |     |                |                |
| 3     | V\$GATA_C   | 5       | 8267 | (-) | NGATAAGNMNN    | ATTATGTATCT    |
| M0012 |             |         |      |     |                |                |
| 6     | V\$GATA1_02 | 0.8     | 8268 | (-) | NNNNNGATANKGNN | TTATGTATCTGTTA |
| M0012 |             | 0.83976 |      |     |                |                |
| 8     | V\$GATA1_04 | 7       | 8268 | (-) | NNCWGATARNNNN  | TTATGTATCTGTT  |
| M0007 |             | 0.81342 |      |     |                |                |
| 5     | V\$GATA1_01 | 5       | 8270 | (-) | SNNGATNNNN     | ATGTATCTGT     |
| M0007 |             | 0.84122 |      |     |                |                |
| 6     | V\$GATA2_01 | 7       | 8270 | (-) | NNNGATRNNN     | ATGTATCTGT     |
| M0007 |             | 0.78479 |      |     |                |                |
| 5     | V\$GATA1_01 | 8       | 8320 | (+) | SNNGATNNNN     | ACAGATTTGA     |
| M0007 |             | 0.78213 |      |     |                |                |
| 6     | V\$GATA2_01 | 8       | 8320 | (+) | NNNGATRNNN     | ACAGATTTGA     |
| M0007 |             | 0.84802 |      |     |                |                |
| 7     | V\$GATA3_01 | 8       | 8321 | (+) | NNGATARNG      | CAGATTTGA      |
| M0007 |             | 0.83958 |      |     |                |                |
| 5     | V\$GATA1_01 | 5       | 8325 | (+) | SNNGATNNNN     | TTTGATTGGT     |
| M0007 |             | 0.83429 |      |     |                |                |
| 7     | V\$GATA3_01 | 3       | 8326 | (+) | NNGATARNG      | TTGATTGGT      |
| M0012 |             | 0.80083 |      |     |                |                |
| 7     | V\$GATA1_03 | 3       | 8345 | (-) | RNSNNGATAANNGN | TTGCCTATATCCTT |
| M0020 |             | 0.84933 |      |     |                |                |
| 3     | V\$GATA_C   | 2       | 8346 | (-) | NGATAAGNMNN    | TGCCTATATCC    |
| M0012 |             | 0.78437 |      |     |                |                |
| 6     | V\$GATA1_02 | 5       | 8347 | (-) | NNNNNGATANKGNN | GCCTATATCCTTAT |
| M0012 |             | 0.80548 |      |     |                |                |
| 7     | V\$GATA1_03 | 8       | 8347 | (-) | RNSNNGATAANNGN | GCCTATATCCTTAT |
| M0007 |             | 0.77838 |      |     |                |                |
| 5     | V\$GATA1_01 | 1       | 8349 | (-) | SNNGATNNNN     | CTATATCCTT     |
| M0007 |             | 0.84934 |      |     |                |                |
| 6     | V\$GATA2_01 | 6       | 8349 | (-) | NNNGATRNNN     | CTATATCCTT     |
| M0007 |             | 0.83650 |      |     |                |                |
| 7     | V\$GATA3_01 | 9       | 8349 | (-) | NNGATARNG      | CTATATCCT      |
| M0007 |             | 0.78331 |      |     |                |                |
| 5     | V\$GATA1_01 | 7       | 8362 | (+) | SNNGATNNNN     | ATTGATTGTA     |
| M0007 |             |         |      |     |                |                |
| 7     | V\$GATA3_01 | 0.84537 | 8363 | (+) | NNGATARNG      | TTGATTGTA      |
| M0007 |             | 0.82543 |      |     |                |                |
| 7     | V\$GATA3_01 | 2       | 8368 | (-) | NNGATARNG      | TGTAATCAT      |
| M0007 |             | 0.79269 |      |     |                |                |
| 5     | V\$GATA1_01 | 5       | 8420 | (+) | SNNGATNNNN     | CCTGTTAGAG     |
| M0007 |             | 0.80898 |      |     |                |                |
| 5     | V\$GATA1_01 | 3       | 8438 | (-) | SNNGATNNNN     | AAAGATCAAC     |
| M0020 |             | 0.83069 |      |     |                |                |
| 3     | V\$GATA_C   | 3       | 8457 | (-) | NGATAAGNMNN    | ATTTCTAATCT    |
| M0007 |             | 0.77887 |      |     |                |                |
| 5     | V\$GATA1_01 | 5       | 8460 | (-) | SNNGATNNNN     | TCTAATCTAG     |
| M0007 |             |         |      |     |                |                |
| 7     | V\$GATA3_01 | 0.86132 | 8460 | (-) | NNGATARNG      | TCTAATCTA      |
| M0012 |             | 0.81700 |      |     |                |                |
| 7     | V\$GATA1_03 | 1       | 8469 | (-) | RNSNNGATAANNGN | GTCATTATGAGCTT |
| M0007 |             | 0.79612 |      |     |                |                |
| 6     | V\$GATA2_01 | 1       | 8471 | (-) | NNNGATRNNN     | CATTATGAGC     |
| M0020 |             | 0.94687 |      |     |                |                |
| 3     | V\$GATA_C   | 8       | 8486 | (-) | NGATAAGNMNN    | TTGTTTTATCT    |
| M0012 |             | 0.77062 |      |     |                |                |
| 6     | V\$GATA1_02 | 5       | 8487 | (-) | NNNNNGATANKGNN | TGTTTTATCTCACT |
| M0012 |             | 0.80009 |      |     |                |                |
| 7     | V\$GATA1_03 | 8       | 8487 | (-) | RNSNNGATAANNGN | TGTTTTATCTCACT |
| M0012 |             | 0.90257 |      |     |                |                |
| 8     | V\$GATA1_04 | 4       | 8487 | (-) | NNCWGATARNNNN  | TGTTTTATCTCAC  |
| M0007 |             | 0.81777 |      |     |                |                |
| 6     | V\$GATA2_01 | 2       | 8489 | (-) | NNNGATRNNN     | TTTTATCTCA     |

|       |             |         |      |     |                |                |
|-------|-------------|---------|------|-----|----------------|----------------|
| M0007 |             | 0.89587 |      |     |                |                |
| 7     | V\$GATA3_01 | 9       | 8489 | (-) | NNGATARNG      | TTTTATCTC      |
| M0012 |             | 0.91562 |      |     |                |                |
| 6     | V\$GATA1_02 | 5       | 8551 | (+) | NNNNNGATANKGNN | GTCCAGATATGGGA |
| M0012 |             | 0.83047 |      |     |                |                |
| 7     | V\$GATA1_03 | 5       | 8551 | (+) | RNSNNGATAANNGN | GTCCAGATATGGGA |
| M0012 |             | 0.90716 |      |     |                |                |
| 8     | V\$GATA1_04 | 9       | 8552 | (+) | NNCWGATARNNNN  | TCCAGATATGGGA  |
| M0007 |             | 0.92448 |      |     |                |                |
| 5     | V\$GATA1_01 | 2       | 8553 | (+) | SNNGATNNNN     | CCAGATATGG     |
| M0007 |             | 0.93098 |      |     |                |                |
| 6     | V\$GATA2_01 | 8       | 8553 | (+) | NNNGATRNNN     | CCAGATATGG     |
| M0007 |             | 0.91670 |      |     |                |                |
| 7     | V\$GATA3_01 | 4       | 8554 | (+) | NNGATARNG      | CAGATATGG      |
| M0007 |             | 0.81055 |      |     |                |                |
| 6     | V\$GATA2_01 | 5       | 8555 | (-) | NNNGATRNNN     | AGATATGGGA     |
| M0020 |             | 0.87076 |      |     |                |                |
| 3     | V\$GATA_C   | 7       | 8555 | (+) | NGATAAGNMNN    | AGATATGGGAC    |
| M0012 |             | 0.78515 |      |     |                |                |
| 7     | V\$GATA1_03 | 4       | 8571 | (+) | RNSNNGATAANNGN | AGGGGAATAGCATA |
| M0012 |             | 0.79218 |      |     |                |                |
| 6     | V\$GATA1_02 | 8       | 8587 | (+) | NNNNNGATANKGNN | GTTTTGATATCTT  |
| M0007 |             |         |      |     |                |                |
| 5     | V\$GATA1_01 | 0.78924 | 8589 | (+) | SNNGATNNNN     | TTTGATATTC     |
| M0007 |             | 0.79792 |      |     |                |                |
| 6     | V\$GATA2_01 | 5       | 8589 | (+) | NNNGATRNNN     | TTTGATATTC     |
| M0012 |             |         |      |     |                |                |
| 6     | V\$GATA1_02 | 0.79375 | 8599 | (+) | NNNNNGATANKGNN | TTAAAGATATACAT |
| M0012 |             | 0.84252 |      |     |                |                |
| 8     | V\$GATA1_04 | 5       | 8600 | (+) | NNCWGATARNNNN  | TAAAGATATACAT  |
| M0007 |             | 0.81822 |      |     |                |                |
| 6     | V\$GATA2_01 | 3       | 8601 | (+) | NNNGATRNNN     | AAAGATATAC     |
| M0020 |             | 0.85243 |      |     |                |                |
| 3     | V\$GATA_C   | 9       | 8603 | (+) | NGATAAGNMNN    | AGATATACATC    |
| M0007 |             | 0.77147 |      |     |                |                |
| 5     | V\$GATA1_01 | 1       | 8607 | (-) | SNNGATNNNN     | ATACATCTTT     |
| M0007 |             | 0.79341 |      |     |                |                |
| 6     | V\$GATA2_01 | 5       | 8607 | (-) | NNNGATRNNN     | ATACATCTTT     |
| M0012 |             | 0.80720 |      |     |                |                |
| 7     | V\$GATA1_03 | 2       | 8616 | (-) | RNSNNGATAANNGN | TTTGTGATCATGAT |
| M0007 |             | 0.81046 |      |     |                |                |
| 5     | V\$GATA1_01 | 4       | 8618 | (+) | SNNGATNNNN     | TGTGATCATG     |
| M0007 |             | 0.79565 |      |     |                |                |
| 5     | V\$GATA1_01 | 6       | 8618 | (-) | SNNGATNNNN     | TGTGATCATG     |
| M0007 |             | 0.82498 |      |     |                |                |
| 6     | V\$GATA2_01 | 9       | 8618 | (+) | NNNGATRNNN     | TGTGATCATG     |
| M0007 |             | 0.80198 |      |     |                |                |
| 6     | V\$GATA2_01 | 5       | 8618 | (-) | NNNGATRNNN     | TGTGATCATG     |
| M0007 |             | 0.87018 |      |     |                |                |
| 5     | V\$GATA1_01 | 8       | 8624 | (+) | SNNGATNNNN     | CATGATTCAG     |
| M0007 |             | 0.81190 |      |     |                |                |
| 6     | V\$GATA2_01 | 8       | 8624 | (+) | NNNGATRNNN     | CATGATTCAG     |
| M0012 |             | 0.82781 |      |     |                |                |
| 6     | V\$GATA1_02 | 3       | 8662 | (+) | NNNNNGATANKGNN | GAGCCGATACTTGG |
| M0012 |             | 0.79299 |      |     |                |                |
| 7     | V\$GATA1_03 | 4       | 8662 | (+) | RNSNNGATAANNGN | GAGCCGATACTTGG |
| M0007 |             | 0.93237 |      |     |                |                |
| 5     | V\$GATA1_01 | 9       | 8664 | (+) | SNNGATNNNN     | GCCGATACTT     |
| M0007 |             | 0.92512 |      |     |                |                |
| 6     | V\$GATA2_01 | 4       | 8664 | (+) | NNNGATRNNN     | GCCGATACTT     |
| M0012 |             | 0.91406 |      |     |                |                |
| 6     | V\$GATA1_02 | 2       | 8698 | (+) | NNNNNGATANKGNN | TTTAAGATAAGGCA |
| M0012 |             | 0.94117 |      |     |                |                |
| 8     | V\$GATA1_04 | 6       | 8699 | (+) | NNCWGATARNNNN  | TTAAGATAAGGCA  |
| M0007 |             | 0.82477 |      |     |                |                |
| 5     | V\$GATA1_01 | 8       | 8700 | (+) | SNNGATNNNN     | TAAGATAAGG     |



|       |             |         |      |     |                 |                |
|-------|-------------|---------|------|-----|-----------------|----------------|
| M0007 |             | 0.89896 |      |     |                 |                |
| 6     | V\$GATA2_01 | 3       | 8700 | (+) | NNNGATRNNN      | TAAGATAAGG     |
| M0007 |             | 0.95436 |      |     |                 |                |
| 7     | V\$GATA3_01 | 4       | 8701 | (+) | NNGATARNG       | AAGATAAGG      |
| M0020 |             | 0.97514 |      |     |                 |                |
| 3     | V\$GATA_C   | 8       | 8702 | (+) | NGATAAGNMNN     | AGATAAGGCAC    |
| M0007 |             | 0.83130 |      |     |                 |                |
| 6     | V\$GATA2_01 | 4       | 8712 | (+) | NNNGATRNNN      | CAGCATGGTG     |
| M0007 |             | 0.78845 |      |     |                 |                |
| 6     | V\$GATA2_01 | 3       | 8712 | (-) | NNNGATRNNN      | CAGCATGGTG     |
| M0007 |             | 0.79565 |      |     |                 |                |
| 5     | V\$GATA1_01 | 6       | 8731 | (+) | SNNGATNNNN      | TAAGATTTCT     |
| M0007 |             | 0.84889 |      |     |                 |                |
| 6     | V\$GATA2_01 | 5       | 8731 | (+) | NNNGATRNNN      | TAAGATTTCT     |
| M0007 |             | 0.80157 |      |     |                 |                |
| 5     | V\$GATA1_01 | 9       | 8776 | (+) | SNNGATNNNN      | TGAGATGAAG     |
| M0007 |             | 0.83220 |      |     |                 |                |
| 6     | V\$GATA2_01 | 6       | 8776 | (+) | NNNGATRNNN      | TGAGATGAAG     |
| M0007 |             | 0.87727 |      |     |                 |                |
| 7     | V\$GATA3_01 | 1       | 8777 | (+) | NNGATARNG       | GAGATGAAG      |
| M0007 |             |         |      |     |                 |                |
| 6     | V\$GATA2_01 | 0.79161 | 8847 | (-) | NNNGATRNNN      | AAATATGGCA     |
| M0007 |             |         |      |     |                 |                |
| 7     | V\$GATA3_01 | 0.82809 | 8861 | (-) | NNGATARNG       | TTCAATCCT      |
| M0007 |             | 0.84698 |      |     |                 |                |
| 5     | V\$GATA1_01 | 9       | 8869 | (-) | SNNGATNNNN      | TTGCATCATG     |
| M0007 |             | 0.80514 |      |     |                 |                |
| 6     | V\$GATA2_01 | 2       | 8869 | (-) | NNNGATRNNN      | TTGCATCATG     |
| M0012 |             | 0.80312 |      |     |                 |                |
| 6     | V\$GATA1_02 | 5       | 8881 | (+) | NNNNNGATANKGNN  | ACTAAGATAATTTT |
| M0012 |             | 0.78980 |      |     |                 |                |
| 7     | V\$GATA1_03 | 9       | 8881 | (+) | RNSNNGATAANNNGN | ACTAAGATAATTTT |
| M0007 |             | 0.80108 |      |     |                 |                |
| 5     | V\$GATA1_01 | 6       | 8883 | (+) | SNNGATNNNN      | TAAGATAATT     |
| M0007 |             | 0.87956 |      |     |                 |                |
| 6     | V\$GATA2_01 | 7       | 8883 | (+) | NNNGATRNNN      | TAAGATAATT     |
| M0007 |             | 0.86663 |      |     |                 |                |
| 7     | V\$GATA3_01 | 7       | 8884 | (+) | NNGATARNG       | AAGATAATT      |
| M0020 |             | 0.86113 |      |     |                 |                |
| 3     | V\$GATA_C   | 7       | 8885 | (+) | NGATAAGNMNN     | AGATAATTTTT    |
| M0007 |             | 0.78123 |      |     |                 |                |
| 6     | V\$GATA2_01 | 6       | 8953 | (-) | NNNGATRNNN      | TTTCATCTTA     |
| M0007 |             | 0.82498 |      |     |                 |                |
| 7     | V\$GATA3_01 | 9       | 8953 | (-) | NNGATARNG       | TTTCATCTT      |
| M0020 |             | 0.83224 |      |     |                 |                |
| 3     | V\$GATA_C   | 6       | 9037 | (-) | NGATAAGNMNN     | TGGAAATATCA    |
| M0012 |             | 0.79031 |      |     |                 |                |
| 6     | V\$GATA1_02 | 2       | 9038 | (-) | NNNNNGATANKGNN  | GGAAATATCATGAA |
| M0012 |             | 0.81893 |      |     |                 |                |
| 8     | V\$GATA1_04 | 4       | 9038 | (-) | NNCWGATARNNNN   | GGAAATATCATGA  |
| M0007 |             |         |      |     |                 |                |
| 5     | V\$GATA1_01 | 0.90079 | 9040 | (-) | SNNGATNNNN      | AAATATCATG     |
| M0007 |             | 0.89219 |      |     |                 |                |
| 6     | V\$GATA2_01 | 7       | 9040 | (-) | NNNGATRNNN      | AAATATCATG     |
| M0020 |             | 0.86144 |      |     |                 |                |
| 3     | V\$GATA_C   | 8       | 9048 | (-) | NGATAAGNMNN     | TGAACATATCA    |
| M0007 |             | 0.79025 |      |     |                 |                |
| 6     | V\$GATA2_01 | 7       | 9049 | (+) | NNNGATRNNN      | GAACATATCA     |
| M0007 |             | 0.81638 |      |     |                 |                |
| 5     | V\$GATA1_01 | 7       | 9051 | (-) | SNNGATNNNN      | ACATATCAAA     |
| M0007 |             | 0.80784 |      |     |                 |                |
| 6     | V\$GATA2_01 | 8       | 9051 | (-) | NNNGATRNNN      | ACATATCAAA     |
| M0007 |             | 0.82675 |      |     |                 |                |
| 5     | V\$GATA1_01 | 2       | 9087 | (+) | SNNGATNNNN      | TGTGATTATT     |
| M0007 |             | 0.81190 |      |     |                 |                |
| 6     | V\$GATA2_01 | 8       | 9087 | (+) | NNNGATRNNN      | TGTGATTATT     |

|       |             |         |      |     |                       |                       |
|-------|-------------|---------|------|-----|-----------------------|-----------------------|
| M0007 |             | 0.82676 |      |     |                       |                       |
| 7     | V\$GATA3_01 | 1       | 9088 | (+) | NNGATARNG             | GTGATTATT             |
| M0007 |             | 0.77245 |      |     |                       |                       |
| 5     | V\$GATA1_01 | 8       | 9105 | (-) | SNNGATNNNN            | AAGAATCTAT            |
| M0022 |             | 0.80262 |      |     |                       |                       |
| 3     | V\$STAT_01  | 2       | 161  | (-) | TTCCCRKAA             | TTAAGATAA             |
| M0022 |             | 0.85354 |      |     |                       |                       |
| 3     | V\$STAT_01  | 2       | 251  | (-) | TTCCCRKAA             | TTTTAGGAA             |
| M0022 |             | 0.79253 |      |     |                       |                       |
| 3     | V\$STAT_01  | 8       | 544  | (+) | TTCCCRKAA             | TTATCAAAA             |
| M0022 |             | 0.93899 |      |     |                       |                       |
| 3     | V\$STAT_01  | 7       | 554  | (+) | TTCCCRKAA             | TTCTCAGAA             |
| M0022 |             | 0.90244 |      |     |                       |                       |
| 3     | V\$STAT_01  | 5       | 554  | (-) | TTCCCRKAA             | TTCTCAGAA             |
| M0022 |             | 0.72929 |      |     |                       |                       |
| 4     | V\$STAT1_01 | 4       | 689  | (+) | NNNSANTTCCGGGAANTGNSN | AGAGAATGCCAGGAAACAAAA |
| M0022 |             | 0.72567 |      |     |                       |                       |
| 4     | V\$STAT1_01 | 1       | 689  | (-) | NNNSANTTCCGGGAANTGNSN | AGAGAATGCCAGGAAACAAAA |
| M0022 |             | 0.74641 |      |     |                       |                       |
| 5     | V\$STAT3_01 | 6       | 689  | (+) | NGNNATTTCCSGGAARTGNNN | AGAGAATGCCAGGAAACAAAA |
| M0022 |             | 0.75872 |      |     |                       |                       |
| 5     | V\$STAT3_01 | 6       | 689  | (-) | NGNNATTTCCSGGAARTGNNN | AGAGAATGCCAGGAAACAAAA |
| M0022 |             |         |      |     |                       |                       |
| 3     | V\$STAT_01  | 0.91152 | 695  | (-) | TTCCCRKAA             | TGCCAGGAA             |
| M0022 |             | 0.83967 |      |     |                       |                       |
| 3     | V\$STAT_01  | 7       | 845  | (-) | TTCCCRKAA             | TTCTAGGTA             |
| M0022 |             | 0.81673 |      |     |                       |                       |
| 3     | V\$STAT_01  | 8       | 875  | (-) | TTCCCRKAA             | TGACAATAA             |
| M0022 |             | 0.79959 |      |     |                       |                       |
| 3     | V\$STAT_01  | 7       | 889  | (+) | TTCCCRKAA             | TTTTTAGAA             |
| M0022 |             | 0.80262 |      |     |                       |                       |
| 3     | V\$STAT_01  | 2       | 965  | (+) | TTCCCRKAA             | TTTTCTTAA             |
| M0022 |             | 0.82682 |      |     |                       |                       |
| 3     | V\$STAT_01  | 1       | 1038 | (-) | TTCCCRKAA             | TTTCAAGAA             |
| M0022 |             | 0.79253 |      |     |                       |                       |
| 3     | V\$STAT_01  | 8       | 1048 | (-) | TTCCCRKAA             | TTATAAAAA             |
| M0022 |             | 0.81295 |      |     |                       |                       |
| 3     | V\$STAT_01  | 7       | 1314 | (-) | TTCCCRKAA             | GTCCAAGAA             |
| M0022 |             |         |      |     |                       |                       |
| 4     | V\$STAT1_01 | 0.77507 | 1370 | (+) | NNNSANTTCCGGGAANTGNSN | GAAGTCTTACTGGAAATAAAA |
| M0022 |             |         |      |     |                       |                       |
| 5     | V\$STAT3_01 | 0.77147 | 1370 | (-) | NGNNATTTCCSGGAARTGNNN | GAAGTCTTACTGGAAATAAAA |
| M0022 |             | 0.92941 |      |     |                       |                       |
| 3     | V\$STAT_01  | 8       | 1376 | (+) | TTCCCRKAA             | TTACTGGAA             |
| M0022 |             | 0.88757 |      |     |                       |                       |
| 3     | V\$STAT_01  | 2       | 1376 | (-) | TTCCCRKAA             | TTACTGGAA             |
| M0022 |             | 0.73357 |      |     |                       |                       |
| 4     | V\$STAT1_01 | 5       | 1545 | (-) | NNNSANTTCCGGGAANTGNSN | GCTCTAATCCCAGAATCTAAG |
| M0022 |             | 0.86639 |      |     |                       |                       |
| 3     | V\$STAT_01  | 8       | 1551 | (+) | TTCCCRKAA             | ATCCCAGAA             |
| M0022 |             | 0.80312 |      |     |                       |                       |
| 3     | V\$STAT_01  | 6       | 1551 | (-) | TTCCCRKAA             | ATCCCAGAA             |
| M0022 |             | 0.85354 |      |     |                       |                       |
| 3     | V\$STAT_01  | 2       | 1628 | (+) | TTCCCRKAA             | TTTCTGTAA             |
| M0022 |             | 0.81673 |      |     |                       |                       |
| 3     | V\$STAT_01  | 8       | 1661 | (-) | TTCCCRKAA             | TTCCAAAAA             |
| M0022 |             | 0.82631 |      |     |                       |                       |
| 3     | V\$STAT_01  | 7       | 1723 | (+) | TTCCCRKAA             | TTAGCAGAA             |
| M0022 |             |         |      |     |                       |                       |
| 3     | V\$STAT_01  | 0.87875 | 1723 | (-) | TTCCCRKAA             | TTAGCAGAA             |
| M0022 |             | 0.71469 |      |     |                       |                       |
| 5     | V\$STAT3_01 | 9       | 1754 | (-) | NGNNATTTCCSGGAARTGNNN | AAACATTAACCTGAAATGTAA |
| M0022 |             | 0.79052 |      |     |                       |                       |
| 3     | V\$STAT_01  | 2       | 1785 | (-) | TTCCCRKAA             | TAATAGTAA             |
| M0022 |             | 0.80589 |      |     |                       |                       |
| 3     | V\$STAT_01  | 9       | 1964 | (+) | TTCCCRKAA             | TCCTTGTA              |

|       |             |         |      |     |                       |                       |
|-------|-------------|---------|------|-----|-----------------------|-----------------------|
| M0022 |             |         |      |     |                       |                       |
| 4     | V\$STAT1_01 | 0.73127 | 2035 | (+) | NNNSANTTCCGGGAANTGNSN | TCCCATTACAGGAATCGAGA  |
| M0022 |             | 0.74032 |      |     |                       |                       |
| 4     | V\$STAT1_01 | 6       | 2035 | (-) | NNNSANTTCCGGGAANTGNSN | TCCCATTACAGGAATCGAGA  |
| M0022 |             | 0.74308 |      |     |                       |                       |
| 5     | V\$STAT3_01 | 5       | 2035 | (-) | NGNNATTTCCSGGAARTGNNN | TCCCATTACAGGAATCGAGA  |
| M0022 |             | 0.85152 |      |     |                       |                       |
| 3     | V\$STAT_01  | 5       | 2041 | (-) | TTCCCRKAA             | TCACAGGAA             |
| M0022 |             | 0.85051 |      |     |                       |                       |
| 3     | V\$STAT_01  | 7       | 2230 | (-) | TTCCCRKAA             | TGCTAAGAA             |
| M0022 |             | 0.80589 |      |     |                       |                       |
| 3     | V\$STAT_01  | 9       | 2491 | (+) | TTCCCRKAA             | TTACTGTAG             |
| M0022 |             | 0.86135 |      |     |                       |                       |
| 3     | V\$STAT_01  | 6       | 2586 | (-) | TTCCCRKAA             | TTATAATAA             |
| M0022 |             | 0.79984 |      |     |                       |                       |
| 3     | V\$STAT_01  | 9       | 2652 | (+) | TTCCCRKAA             | TTAAGGTAA             |
| M0022 |             | 0.84648 |      |     |                       |                       |
| 3     | V\$STAT_01  | 3       | 2652 | (-) | TTCCCRKAA             | TTAAGGTAA             |
| M0022 |             | 0.80589 |      |     |                       |                       |
| 3     | V\$STAT_01  | 9       | 2902 | (+) | TTCCCRKAA             | TAAGTGTAA             |
| M0022 |             | 0.82631 |      |     |                       |                       |
| 3     | V\$STAT_01  | 7       | 2933 | (+) | TTCCCRKAA             | TTAGCAGAA             |
| M0022 |             |         |      |     |                       |                       |
| 3     | V\$STAT_01  | 0.87875 | 2933 | (-) | TTCCCRKAA             | TTAGCAGAA             |
| M0022 |             | 0.77474 |      |     |                       |                       |
| 4     | V\$STAT1_01 | 1       | 3028 | (+) | NNNSANTTCCGGGAANTGNSN | GGCAATTTCCAGATTAGAG   |
| M0022 |             | 0.73888 |      |     |                       |                       |
| 5     | V\$STAT3_01 | 5       | 3028 | (+) | NGNNATTTCCSGGAARTGNNN | GGCAATTTCCAGATTAGAG   |
| M0022 |             | 0.73743 |      |     |                       |                       |
| 5     | V\$STAT3_01 | 7       | 3028 | (-) | NGNNATTTCCSGGAARTGNNN | GGCAATTTCCAGATTAGAG   |
| M0022 |             | 0.86639 |      |     |                       |                       |
| 3     | V\$STAT_01  | 8       | 3034 | (+) | TTCCCRKAA             | TTCCAGAT              |
| M0022 |             | 0.80312 |      |     |                       |                       |
| 3     | V\$STAT_01  | 6       | 3034 | (-) | TTCCCRKAA             | TTCCAGAT              |
| M0022 |             | 0.81976 |      |     |                       |                       |
| 3     | V\$STAT_01  | 3       | 3043 | (-) | TTCCCRKAA             | TTAGAGCAA             |
| M0022 |             |         |      |     |                       |                       |
| 3     | V\$STAT_01  | 0.80968 | 3077 | (-) | TTCCCRKAA             | TTACATTAA             |
| M0022 |             | 0.71223 |      |     |                       |                       |
| 5     | V\$STAT3_01 | 8       | 3102 | (-) | NGNNATTTCCSGGAARTGNNN | TACTCTTGCCTGGAAAACCCC |
| M0022 |             | 0.85681 |      |     |                       |                       |
| 3     | V\$STAT_01  | 9       | 3108 | (+) | TTCCCRKAA             | TGCCTGGAA             |
| M0022 |             | 0.83287 |      |     |                       |                       |
| 3     | V\$STAT_01  | 1       | 3108 | (-) | TTCCCRKAA             | TGCCTGGAA             |
| M0022 |             | 0.86362 |      |     |                       |                       |
| 3     | V\$STAT_01  | 5       | 3530 | (-) | TTCCCRKAA             | TTAAAGGAA             |
| M0022 |             | 0.84371 |      |     |                       |                       |
| 3     | V\$STAT_01  | 1       | 3561 | (+) | TTCCCRKAA             | TTCTAGTAA             |
| M0022 |             | 0.91227 |      |     |                       |                       |
| 3     | V\$STAT_01  | 6       | 3561 | (-) | TTCCCRKAA             | TTCTAGTAA             |
| M0022 |             | 0.88555 |      |     |                       |                       |
| 3     | V\$STAT_01  | 6       | 3586 | (+) | TTCCCRKAA             | TTATTGGAA             |
| M0022 |             | 0.87043 |      |     |                       |                       |
| 3     | V\$STAT_01  | 1       | 3586 | (-) | TTCCCRKAA             | TTATTGGAA             |
| M0022 |             | 0.79581 |      |     |                       |                       |
| 3     | V\$STAT_01  | 5       | 3814 | (-) | TTCCCRKAA             | ATCTAGTAA             |
| M0022 |             | 0.80470 |      |     |                       |                       |
| 4     | V\$STAT1_01 | 9       | 4052 | (-) | NNNSANTTCCGGGAANTGNSN | CCCCATTCTGGGATTCTCC   |
| M0022 |             | 0.71600 |      |     |                       |                       |
| 5     | V\$STAT3_01 | 3       | 4052 | (-) | NGNNATTTCCSGGAARTGNNN | CCCCATTCTGGGATTCTCC   |
| M0022 |             | 0.85858 |      |     |                       |                       |
| 3     | V\$STAT_01  | 3       | 4058 | (+) | TTCCCRKAA             | TTCTGGGA              |
| M0022 |             | 0.83287 |      |     |                       |                       |
| 3     | V\$STAT_01  | 1       | 4212 | (+) | TTCCCRKAA             | TTCCAGGCA             |
| M0022 |             | 0.85681 |      |     |                       |                       |
| 3     | V\$STAT_01  | 9       | 4212 | (-) | TTCCCRKAA             | TTCCAGGCA             |

|       |             |         |      |     |                       |                        |
|-------|-------------|---------|------|-----|-----------------------|------------------------|
| M0022 |             | 0.85354 |      |     |                       |                        |
| 3     | V\$STAT_01  | 2       | 4248 | (+) | TTCCCRKAA             | TTCTCTGAA              |
| M0022 |             | 0.83362 |      |     |                       |                        |
| 3     | V\$STAT_01  | 7       | 4248 | (-) | TTCCCRKAA             | TTCTCTGAA              |
| M0022 |             | 0.83261 |      |     |                       |                        |
| 3     | V\$STAT_01  | 9       | 4262 | (-) | TTCCCRKAA             | TTATAGGAG              |
| M0022 |             | 0.90521 |      |     |                       |                        |
| 3     | V\$STAT_01  | 8       | 4280 | (+) | TTCCCRKAA             | TTCTTATAA              |
| M0022 |             | 0.81295 |      |     |                       |                        |
| 3     | V\$STAT_01  | 7       | 4361 | (+) | TTCCCRKAA             | TCCTTGGA               |
| M0022 |             | 0.79304 |      |     |                       |                        |
| 3     | V\$STAT_01  | 3       | 4364 | (-) | TTCCCRKAA             | TTGGAAGAA              |
| M0022 |             |         |      |     |                       |                        |
| 5     | V\$STAT3_01 | 0.73092 | 4450 | (+) | NGNNATTTCCSGGAARTGNNN | ATGGTTTTCCAGTAGTCATG   |
| M0022 |             | 0.86816 |      |     |                       |                        |
| 3     | V\$STAT_01  | 2       | 4456 | (+) | TTCCCRKAA             | TTCCCAGTA              |
| M0022 |             | 0.80312 |      |     |                       |                        |
| 3     | V\$STAT_01  | 6       | 4456 | (-) | TTCCCRKAA             | TTCCCAGTA              |
| M0022 |             | 0.80463 |      |     |                       |                        |
| 3     | V\$STAT_01  | 8       | 4704 | (-) | TTCCCRKAA             | TGCTGGGAG              |
| M0022 |             | 0.76617 |      |     |                       |                        |
| 4     | V\$STAT1_01 | 8       | 4793 | (+) | NNNSANTTCCGGGAANTGNSN | AGTGAAC TCCGGGAGTTGGTG |
| M0022 |             | 0.74806 |      |     |                       |                        |
| 4     | V\$STAT1_01 | 5       | 4793 | (-) | NNNSANTTCCGGGAANTGNSN | AGTGAAC TCCGGGAGTTGGTG |
| M0022 |             | 0.76813 |      |     |                       |                        |
| 5     | V\$STAT3_01 | 9       | 4793 | (+) | NGNNATTTCCSGGAARTGNNN | AGTGAAC TCCGGGAGTTGGTG |
| M0022 |             | 0.71745 |      |     |                       |                        |
| 5     | V\$STAT3_01 | 1       | 4793 | (-) | NGNNATTTCCSGGAARTGNNN | AGTGAAC TCCGGGAGTTGGTG |
| M0022 |             | 0.80262 |      |     |                       |                        |
| 3     | V\$STAT_01  | 2       | 4996 | (+) | TTCCCRKAA             | TTTTCTAA               |
| M0022 |             | 0.80060 |      |     |                       |                        |
| 3     | V\$STAT_01  | 5       | 5002 | (-) | TTCCCRKAA             | TAAGGAGAA              |
| M0022 |             | 0.83287 |      |     |                       |                        |
| 3     | V\$STAT_01  | 1       | 5118 | (+) | TTCCCRKAA             | TTCCAGGCA              |
| M0022 |             | 0.85681 |      |     |                       |                        |
| 3     | V\$STAT_01  | 9       | 5118 | (-) | TTCCCRKAA             | TTCCAGGCA              |
| M0022 |             | 0.79253 |      |     |                       |                        |
| 3     | V\$STAT_01  | 8       | 5563 | (+) | TTCCCRKAA             | TTTTTATAA              |
| M0022 |             | 0.82253 |      |     |                       |                        |
| 3     | V\$STAT_01  | 6       | 5602 | (+) | TTCCCRKAA             | TAACCAGAA              |
| M0022 |             | 0.79783 |      |     |                       |                        |
| 3     | V\$STAT_01  | 2       | 5602 | (-) | TTCCCRKAA             | TAACCAGAA              |
| M0022 |             |         |      |     |                       |                        |
| 3     | V\$STAT_01  | 0.8364  | 5674 | (-) | TTCCCRKAA             | TTTTGAGAA              |
| M0022 |             | 0.86135 |      |     |                       |                        |
| 3     | V\$STAT_01  | 6       | 5712 | (-) | TTCCCRKAA             | TTATAATAA              |
| M0022 |             | 0.79581 |      |     |                       |                        |
| 3     | V\$STAT_01  | 5       | 5730 | (-) | TTCCCRKAA             | GTCTAAGAA              |
| M0022 |             | 0.84471 |      |     |                       |                        |
| 3     | V\$STAT_01  | 9       | 5952 | (+) | TTCCCRKAA             | TTATTCTAA              |
| M0022 |             | 0.79959 |      |     |                       |                        |
| 3     | V\$STAT_01  | 7       | 6193 | (-) | TTCCCRKAA             | TTCTAAAAA              |
| M0022 |             | 0.82631 |      |     |                       |                        |
| 3     | V\$STAT_01  | 7       | 6284 | (+) | TTCCCRKAA             | TTAGCAGAA              |
| M0022 |             |         |      |     |                       |                        |
| 3     | V\$STAT_01  | 0.87875 | 6284 | (-) | TTCCCRKAA             | TTAGCAGAA              |
| M0022 |             | 0.79984 |      |     |                       |                        |
| 3     | V\$STAT_01  | 9       | 6348 | (+) | TTCCCRKAA             | TTGTGGTAA              |
| M0022 |             |         |      |     |                       |                        |
| 3     | V\$STAT_01  | 0.8364  | 6348 | (-) | TTCCCRKAA             | TTGTGGTAA              |
| M0022 |             | 0.81673 |      |     |                       |                        |
| 3     | V\$STAT_01  | 8       | 6573 | (-) | TTCCCRKAA             | TTCCATTAA              |
| M0022 |             |         |      |     |                       |                        |
| 3     | V\$STAT_01  | 0.8364  | 6643 | (-) | TTCCCRKAA             | TTATATGAA              |
| M0022 |             | 0.81724 |      |     |                       |                        |
| 3     | V\$STAT_01  | 2       | 6786 | (-) | TTCCCRKAA             | TAATGAGAA              |

|       |             |         |      |     |                       |                       |
|-------|-------------|---------|------|-----|-----------------------|-----------------------|
| M0022 |             | 0.74180 |      |     |                       |                       |
| 4     | V\$STAT1_01 | 8       | 6874 | (+) | NNNSANTTCCGGGAANTGNSN | TTTCTCTTCACTGAATTATGT |
| M0022 |             | 0.71339 |      |     |                       |                       |
| 5     | V\$STAT3_01 | 6       | 6874 | (-) | NGNNATTTCCSGGAARTGNNN | TTTCTCTTCACTGAATTATGT |
| M0022 |             | 0.72254 |      |     |                       |                       |
| 4     | V\$STAT1_01 | 2       | 6965 | (-) | NNNSANTTCCGGGAANTGNSN | CCTTCTTTCCAGGATGAACTC |
| M0022 |             | 0.85681 |      |     |                       |                       |
| 3     | V\$STAT_01  | 9       | 6971 | (-) | TTCCCRKAA             | TTCCAGGAT             |
| M0022 |             | 0.79304 |      |     |                       |                       |
| 3     | V\$STAT_01  | 3       | 7080 | (+) | TTCCCRKAA             | TTACTCAAA             |
| M0022 |             | 0.73275 |      |     |                       |                       |
| 4     | V\$STAT1_01 | 2       | 7175 | (-) | NNNSANTTCCGGGAANTGNSN | ATGCCCTTCCCTAAATATCCA |
| M0022 |             | 0.79480 |      |     |                       |                       |
| 3     | V\$STAT_01  | 7       | 7181 | (+) | TTCCCRKAA             | TTCCCTAAA             |
| M0022 |             | 0.82682 |      |     |                       |                       |
| 3     | V\$STAT_01  | 1       | 7206 | (+) | TTCCCRKAA             | TTACTGAAA             |
| M0022 |             | 0.83690 |      |     |                       |                       |
| 3     | V\$STAT_01  | 4       | 7302 | (+) | TTCCCRKAA             | TTCTTCCAA             |
| M0022 |             | 0.73656 |      |     |                       |                       |
| 5     | V\$STAT3_01 | 8       | 7363 | (+) | NGNNATTTCCSGGAARTGNNN | GCCTGTTCCCCAGAAAGCAGT |
| M0022 |             | 0.86639 |      |     |                       |                       |
| 3     | V\$STAT_01  | 8       | 7369 | (+) | TTCCCRKAA             | TCCCCAGAA             |
| M0022 |             |         |      |     |                       |                       |
| 3     | V\$STAT_01  | 0.80489 | 7369 | (-) | TTCCCRKAA             | TCCCCAGAA             |
| M0022 |             | 0.74197 |      |     |                       |                       |
| 4     | V\$STAT1_01 | 3       | 7458 | (-) | NNNSANTTCCGGGAANTGNSN | TCCCTATTCTTGTAAGTCTAA |
| M0022 |             | 0.92235 |      |     |                       |                       |
| 3     | V\$STAT_01  | 9       | 7464 | (+) | TTCCCRKAA             | TTCTTGTA              |
| M0022 |             | 0.83362 |      |     |                       |                       |
| 3     | V\$STAT_01  | 7       | 7464 | (-) | TTCCCRKAA             | TTCTTGTA              |
| M0022 |             | 0.79304 |      |     |                       |                       |
| 3     | V\$STAT_01  | 3       | 7521 | (-) | TTCCCRKAA             | TTTGAGTAA             |
| M0022 |             | 0.87723 |      |     |                       |                       |
| 3     | V\$STAT_01  | 7       | 7594 | (+) | TTCCCRKAA             | TTCTCAGCA             |
| M0022 |             | 0.81976 |      |     |                       |                       |
| 3     | V\$STAT_01  | 3       | 7772 | (-) | TTCCCRKAA             | TTAGATGAA             |
| M0022 |             | 0.82656 |      |     |                       |                       |
| 3     | V\$STAT_01  | 9       | 7791 | (+) | TTCCCRKAA             | TTACAATAA             |
| M0022 |             | 0.87849 |      |     |                       |                       |
| 3     | V\$STAT_01  | 8       | 7791 | (-) | TTCCCRKAA             | TTACAATAA             |
| M0022 |             | 0.73653 |      |     |                       |                       |
| 4     | V\$STAT1_01 | 9       | 8090 | (-) | NNNSANTTCCGGGAANTGNSN | CCTCACTTTTGGTAAGCTTTA |
| M0022 |             | 0.79984 |      |     |                       |                       |
| 3     | V\$STAT_01  | 9       | 8096 | (+) | TTCCCRKAA             | TTTTGGTAA             |
| M0022 |             |         |      |     |                       |                       |
| 3     | V\$STAT_01  | 0.8364  | 8096 | (-) | TTCCCRKAA             | TTTTGGTAA             |
| M0022 |             |         |      |     |                       |                       |
| 3     | V\$STAT_01  | 0.79884 | 8108 | (-) | TTCCCRKAA             | TTAGGAGAT             |
| M0022 |             | 0.81598 |      |     |                       |                       |
| 3     | V\$STAT_01  | 2       | 8116 | (-) | TTCCCRKAA             | TTAGAGGCA             |
| M0022 |             | 0.73275 |      |     |                       |                       |
| 4     | V\$STAT1_01 | 2       | 8159 | (+) | NNNSANTTCCGGGAANTGNSN | TTAATTTTCTGGATAAGACC  |
| M0022 |             | 0.85681 |      |     |                       |                       |
| 3     | V\$STAT_01  | 9       | 8165 | (+) | TTCCCRKAA             | TTCTGGAT              |
| M0022 |             |         |      |     |                       |                       |
| 3     | V\$STAT_01  | 0.8364  | 8377 | (-) | TTCCCRKAA             | TTATAGAAA             |
| M0022 |             | 0.81598 |      |     |                       |                       |
| 3     | V\$STAT_01  | 2       | 8678 | (-) | TTCCCRKAA             | CTAGAGGAA             |
| M0022 |             | 0.79253 |      |     |                       |                       |
| 3     | V\$STAT_01  | 8       | 8687 | (+) | TTCCCRKAA             | TTTTTATAA             |
| M0022 |             | 0.80262 |      |     |                       |                       |
| 3     | V\$STAT_01  | 2       | 8699 | (-) | TTCCCRKAA             | TTAAGATAA             |
| M0022 |             |         |      |     |                       |                       |
| 3     | V\$STAT_01  | 0.80968 | 8722 | (+) | TTCCCRKAA             | TTTTTGTA              |
| M0022 |             | 0.81925 |      |     |                       |                       |
| 3     | V\$STAT_01  | 9       | 8742 | (-) | TTCCCRKAA             | TTATGAAAA             |

|       |             |         |      |     |                         |                        |
|-------|-------------|---------|------|-----|-------------------------|------------------------|
| M0022 |             | 0.71122 |      |     |                         |                        |
| 5     | V\$STAT3_01 | 4       | 8818 | (+) | NGNNATTTCCSGGAARTGNNN   | CTCTATTCCACAGAATTGACT  |
| M0022 |             | 0.71252 |      |     |                         |                        |
| 5     | V\$STAT3_01 | 7       | 8818 | (-) | NGNNATTTCCSGGAARTGNNN   | CTCTATTCCACAGAATTGACT  |
| M0022 |             | 0.81925 |      |     |                         |                        |
| 3     | V\$STAT_01  | 9       | 9012 | (+) | TTCCCRKAA               | TTAGCATAA              |
| M0022 |             | 0.83488 |      |     |                         |                        |
| 3     | V\$STAT_01  | 8       | 9012 | (-) | TTCCCRKAA               | TTAGCATAA              |
| M0022 |             | 0.77688 |      |     |                         |                        |
| 4     | V\$STAT1_01 | 1       | 9071 | (+) | NNNSANTTCCGGAANTGNSN    | AAATAATTTCTGGAATTGTGA  |
| M0022 |             | 0.73357 |      |     |                         |                        |
| 4     | V\$STAT1_01 | 5       | 9071 | (-) | NNNSANTTCCGGAANTGNSN    | AAATAATTTCTGGAATTGTGA  |
| M0022 |             | 0.73830 |      |     |                         |                        |
| 5     | V\$STAT3_01 | 6       | 9071 | (-) | NGNNATTTCCSGGAARTGNNN   | AAATAATTTCTGGAATTGTGA  |
| M0022 |             |         |      |     |                         |                        |
| 3     | V\$STAT_01  | 0.8606  | 9077 | (+) | TTCCCRKAA               | TTTCTGGAA              |
| M0022 |             | 0.79203 |      |     |                         |                        |
| 3     | V\$STAT_01  | 4       | 9077 | (-) | TTCCCRKAA               | TTTCTGGAA              |
| M0016 |             | 0.81601 |      |     |                         |                        |
| 2     | V\$OCT1_06  | 6       | 44   | (-) | CWNAWTKWSATRYN          | AAAAGGTAAGAATC         |
| M0016 |             | 0.89062 |      |     |                         |                        |
| 2     | V\$OCT1_06  | 5       | 52   | (-) | CWNAWTKWSATRYN          | AGAATCTCAGATAT         |
| M0016 |             | 0.83437 |      |     |                         |                        |
| 2     | V\$OCT1_06  | 5       | 53   | (+) | CWNAWTKWSATRYN          | GAATCTCAGATATA         |
| M0013 |             | 0.79360 |      |     |                         | AGATATAATTCAGTG-       |
| 8     | V\$OCT1_04  | 1       | 60   | (-) | NNNNNNNNWATGCAAATNNNWNW | TATCTGC                |
| M0013 |             | 0.85499 |      |     |                         |                        |
| 7     | V\$OCT1_03  | 8       | 86   | (-) | NNNRTAATNANNN           | TCATCTTTATTTT          |
| M0013 |             | 0.79443 |      |     |                         | TTT-                   |
| 8     | V\$OCT1_04  | 7       | 96   | (+) | NNNNNNNNWATGCAAATNNNWNW | GGACTAGGTTAAAATGTAGA   |
| M0013 |             | 0.80644 |      |     |                         |                        |
| 6     | V\$OCT1_02  | 3       | 116  | (-) | NNGAATATKCANNNN         | AGAAAGAATATAATT        |
| M0016 |             | 0.84257 |      |     |                         |                        |
| 2     | V\$OCT1_06  | 8       | 120  | (-) | CWNAWTKWSATRYN          | AGAATATAATTGCT         |
| M0013 |             | 0.84670 |      |     |                         |                        |
| 7     | V\$OCT1_03  | 1       | 123  | (-) | NNNRTAATNANNN           | ATATAATTGCTTA          |
| M0013 |             | 0.79130 |      |     |                         | AAATAGATCTTAAAAA-      |
| 8     | V\$OCT1_04  | 1       | 136  | (+) | NNNNNNNNWATGCAAATNNNWNW | TAAGGGT                |
| M0013 |             | 0.73655 |      |     |                         |                        |
| 5     | V\$OCT1_01  | 1       | 179  | (+) | NNNNWTATGCAAATNTNNN     | AATTTTCAGCAAATATGTT    |
| M0013 |             | 0.85382 |      |     |                         | CAGCAAATATGTTAAAAAA-   |
| 8     | V\$OCT1_04  | 7       | 185  | (+) | NNNNNNNNWATGCAAATNNNWNW | TAGA                   |
| M0013 |             | 0.76936 |      |     |                         |                        |
| 5     | V\$OCT1_01  | 3       | 187  | (+) | NNNNWTATGCAAATNTNNN     | GCAAATATGTTAAAAAATA    |
| M0013 |             | 0.79130 |      |     |                         | AAGTGACTATAAAGATTTGA-  |
| 8     | V\$OCT1_04  | 1       | 207  | (+) | NNNNNNNNWATGCAAATNNNWNW | TAA                    |
| M0013 |             | 0.84235 |      |     |                         |                        |
| 7     | V\$OCT1_03  | 5       | 212  | (+) | NNNRTAATNANNN           | ACTATAAAGATTT          |
| M0013 |             | 0.81200 |      |     |                         | AGATTTGA-              |
| 8     | V\$OCT1_04  | 3       | 219  | (-) | NNNNNNNNWATGCAAATNNNWNW | TAAAAATTATAGTGA        |
| M0013 |             | 0.85618 |      |     |                         |                        |
| 7     | V\$OCT1_03  | 3       | 223  | (+) | NNNRTAATNANNN           | TTGATAAAAATTA          |
| M0016 |             |         |      |     |                         |                        |
| 2     | V\$OCT1_06  | 0.80625 | 229  | (-) | CWNAWTKWSATRYN          | AAAATTATAGTGAC         |
| M0013 |             | 0.78837 |      |     |                         | TATAGTGACTG-           |
| 8     | V\$OCT1_04  | 3       | 234  | (+) | NNNNNNNNWATGCAAATNNNWNW | CAAATGTTTTAG           |
| M0013 |             | 0.74704 |      |     |                         |                        |
| 5     | V\$OCT1_01  | 3       | 236  | (+) | NNNNWTATGCAAATNTNNN     | TAGTGACTGCAAATGTTTT    |
| M0016 |             | 0.82148 |      |     |                         |                        |
| 2     | V\$OCT1_06  | 4       | 239  | (-) | CWNAWTKWSATRYN          | TGACTGCAAATGTT         |
| M0013 |             | 0.83730 |      |     |                         | AATGTTTTAGGAATATAATAA- |
| 8     | V\$OCT1_04  | 7       | 247  | (+) | NNNNNNNNWATGCAAATNNNWNW | GA                     |
| M0013 |             | 0.77747 |      |     |                         |                        |
| 6     | V\$OCT1_02  | 7       | 252  | (-) | NNGAATATKCANNNN         | TTTAGGAATATAATA        |
| M0013 |             | 0.89964 |      |     |                         |                        |
| 7     | V\$OCT1_03  | 4       | 258  | (+) | NNNRTAATNANNN           | AATATAATAAGAT          |

|       |            |         |     |     |                        |                          |
|-------|------------|---------|-----|-----|------------------------|--------------------------|
| M0016 |            | 0.83281 |     |     |                        |                          |
| 2     | V\$OCT1_06 | 2       | 260 | (+) | CWNAWTKWSATRYN         | TATAATAAGATGTA           |
| M0016 |            | 0.90351 |     |     |                        |                          |
| 2     | V\$OCT1_06 | 6       | 320 | (-) | CWNAWTKWSATRYN         | TGTATTAAGATC             |
| M0013 |            |         |     |     |                        |                          |
| 8     | V\$OCT1_04 | 0.80092 | 337 | (-) | NNNNNNNWATGCAAATNNWNNW | TCTTGAATTAAATATTTCAATT   |
| M0016 |            | 0.86835 |     |     |                        |                          |
| 2     | V\$OCT1_06 | 9       | 339 | (+) | CWNAWTKWSATRYN         | TTGAATTAAATATT           |
| M0016 |            | 0.89843 |     |     |                        |                          |
| 2     | V\$OCT1_06 | 7       | 340 | (-) | CWNAWTKWSATRYN         | TGAATTAAATATTT           |
| M0013 |            | 0.80319 |     |     |                        |                          |
| 6     | V\$OCT1_02 | 4       | 341 | (-) | NNGAATATKCANNNN        | GAATTAAATATTTTC          |
| M0013 |            | 0.78398 |     |     |                        |                          |
| 8     | V\$OCT1_04 | 2       | 343 | (-) | NNNNNNNWATGCAAATNNWNNW | ATTAAATATTTTCAATTTGATTA  |
| M0013 |            | 0.81095 |     |     |                        |                          |
| 8     | V\$OCT1_04 | 8       | 344 | (-) | NNNNNNNWATGCAAATNNWNNW | TTAAATATTTTCAATTTGATTAA  |
| M0016 |            | 0.84726 |     |     |                        |                          |
| 2     | V\$OCT1_06 | 6       | 347 | (+) | CWNAWTKWSATRYN         | AATATTTTCAATTT           |
| M0016 |            | 0.80078 |     |     |                        |                          |
| 2     | V\$OCT1_06 | 1       | 348 | (+) | CWNAWTKWSATRYN         | ATATTTTCAATTTG           |
| M0013 |            | 0.80050 |     |     |                        |                          |
| 8     | V\$OCT1_04 | 2       | 350 | (-) | NNNNNNNWATGCAAATNNWNNW | ATTTTCAATTTGATTAAACCTAC  |
| M0013 |            | 0.74093 |     |     |                        |                          |
| 5     | V\$OCT1_01 | 9       | 352 | (-) | NNNNWTATGCAAATNTNNN    | TTTCAATTTGATTAAACCT      |
| M0024 |            | 0.81450 |     |     |                        |                          |
| 8     | V\$OCT1_07 | 1       | 356 | (-) | TNTATGNTAATT           | AATTTGATTAAA             |
| M0013 |            | 0.85657 |     |     |                        |                          |
| 7     | V\$OCT1_03 | 8       | 357 | (-) | NNNRTAATNANNN          | ATTTGATTAAACC            |
| M0016 |            | 0.82148 |     |     |                        |                          |
| 2     | V\$OCT1_06 | 4       | 390 | (+) | CWNAWTKWSATRYN         | GCACATTTAATTTA           |
| M0016 |            | 0.93242 |     |     |                        |                          |
| 2     | V\$OCT1_06 | 2       | 391 | (-) | CWNAWTKWSATRYN         | CACATTTAATTTAT           |
| M0013 |            | 0.87076 |     |     |                        |                          |
| 8     | V\$OCT1_04 | 5       | 407 | (-) | NNNNNNNWATGCAAATNNWNNW | TATGGGGATTGAATAATTAT-TA  |
| M0013 |            |         |     |     |                        |                          |
| 5     | V\$OCT1_01 | 0.85311 | 409 | (-) | NNNNWTATGCAAATNTNNN    | TGGGGATTGAATAATTAT       |
| M0016 |            | 0.87215 |     |     |                        |                          |
| 1     | V\$OCT1_05 | 7       | 411 | (+) | MKNATTTGCATAYY         | GGGATTGAATAAT            |
| M0016 |            |         |     |     |                        |                          |
| 2     | V\$OCT1_06 | 0.80625 | 411 | (+) | CWNAWTKWSATRYN         | GGGATTGAATAAT            |
| M0019 |            | 0.85644 |     |     |                        |                          |
| 5     | V\$OCT1_Q6 | 1       | 411 | (-) | NNNNATGCAAATNAN        | GGGATTGAATAAATT          |
| M0013 |            | 0.86058 |     |     |                        |                          |
| 6     | V\$OCT1_02 | 5       | 413 | (-) | NNGAATATKCANNNN        | GATTTGAATAATTAT          |
| M0024 |            | 0.79520 |     |     |                        |                          |
| 8     | V\$OCT1_07 | 9       | 413 | (-) | TNTATGNTAATT           | GATTTGAATAAT             |
| M0013 |            | 0.89885 |     |     |                        |                          |
| 7     | V\$OCT1_03 | 4       | 417 | (+) | NNNRTAATNANNN          | TGAATAATTATTA            |
| M0013 |            | 0.87514 |     |     |                        |                          |
| 7     | V\$OCT1_03 | 8       | 418 | (-) | NNNRTAATNANNN          | GAATAATTATTAC            |
| M0013 |            |         |     |     |                        |                          |
| 7     | V\$OCT1_03 | 0.88226 | 421 | (-) | NNNRTAATNANNN          | TAATTATTACTGA            |
| M0013 |            | 0.77813 |     |     |                        |                          |
| 5     | V\$OCT1_01 | 8       | 457 | (-) | NNNNWTATGCAAATNTNNN    | ATAGAGCTAGCATATTTAG      |
| M0013 |            | 0.84677 |     |     |                        |                          |
| 6     | V\$OCT1_02 | 9       | 461 | (-) | NNGAATATKCANNNN        | AGCTAGCATATTTAG          |
| M0013 |            | 0.79047 |     |     |                        |                          |
| 6     | V\$OCT1_02 | 1       | 464 | (+) | NNGAATATKCANNNN        | TAGCATATTTAGTCA          |
| M0013 |            | 0.86724 |     |     |                        |                          |
| 7     | V\$OCT1_03 | 6       | 480 | (+) | NNNRTAATNANNN          | GAGATAAAGAGGG            |
| M0013 |            | 0.78000 |     |     |                        |                          |
| 8     | V\$OCT1_04 | 8       | 494 | (-) | NNNNNNNWATGCAAATNNWNNW | TGTTAGGATATATATGCTATTTG  |
| M0013 |            | 0.78607 |     |     |                        |                          |
| 8     | V\$OCT1_04 | 3       | 499 | (+) | NNNNNNNWATGCAAATNNWNNW | GGATATATATGCTATTT-GAAAGG |
| M0013 |            | 0.82067 |     |     |                        |                          |
| 5     | V\$OCT1_01 | 9       | 501 | (+) | NNNNWTATGCAAATNTNNN    | ATATATATGCTATTTGAAA      |

|       |            |         |     |     |                        |                         |
|-------|------------|---------|-----|-----|------------------------|-------------------------|
| M0013 |            | 0.80265 |     |     |                        |                         |
| 6     | V\$OCT1_02 | 3       | 501 | (+) | NNGAATATKCANNNN        | ATATATATGCTATTT         |
| M0024 |            |         |     |     |                        |                         |
| 8     | V\$OCT1_07 | 0.89718 | 504 | (+) | TNTATGNTAATT           | TATATGCTATTT            |
| M0016 |            | 0.84726 |     |     |                        |                         |
| 2     | V\$OCT1_06 | 6       | 510 | (+) | CWNAWTKWSATRYN         | CTATTTGAAAGGTA          |
| M0016 |            | 0.81328 |     |     |                        |                         |
| 2     | V\$OCT1_06 | 1       | 511 | (-) | CWNAWTKWSATRYN         | TATTTGAAAGGTAT          |
| M0013 |            | 0.81116 |     |     |                        | TGAAAGGTATTTATAAAAGAA-  |
| 8     | V\$OCT1_04 | 7       | 515 | (+) | NNNNNNNWATGCAAATNNNWNW | GA                      |
| M0016 |            | 0.82656 |     |     |                        |                         |
| 2     | V\$OCT1_06 | 2       | 520 | (-) | CWNAWTKWSATRYN         | GGTATTTATAAAAG          |
| M0013 |            | 0.79236 |     |     |                        |                         |
| 6     | V\$OCT1_02 | 6       | 536 | (+) | NNGAATATKCANNNN        | GAGTATATTTATCAA         |
| M0013 |            |         |     |     |                        |                         |
| 7     | V\$OCT1_03 | 0.84275 | 538 | (-) | NNNRTAATNANNN          | GTATATTTATCAA           |
| M0013 |            | 0.81890 |     |     |                        |                         |
| 8     | V\$OCT1_04 | 4       | 538 | (+) | NNNNNNNWATGCAAATNNNWNW | GTATATTTATCAAAATTTCTCAG |
| M0013 |            | 0.78105 |     |     |                        |                         |
| 8     | V\$OCT1_04 | 4       | 539 | (-) | NNNNNNNWATGCAAATNNNWNW | TATATTTATCAAAATTTCTCAGA |
| M0013 |            | 0.78386 |     |     |                        |                         |
| 5     | V\$OCT1_01 | 1       | 540 | (+) | NNNNWTATGCAAATNTNNN    | ATATTTATCAAAATTTCTC     |
| M0016 |            | 0.86562 |     |     |                        |                         |
| 2     | V\$OCT1_06 | 5       | 543 | (-) | CWNAWTKWSATRYN         | TTTATCAAAATTTCTC        |
| M0024 |            | 0.79584 |     |     |                        |                         |
| 8     | V\$OCT1_07 | 5       | 543 | (+) | TNTATGNTAATT           | TTTATCAAAATT            |
| M0013 |            | 0.78021 |     |     |                        | CTCAGAACATCCAAATTTCAAG  |
| 8     | V\$OCT1_04 | 7       | 556 | (+) | NNNNNNNWATGCAAATNNNWNW | T                       |
| M0013 |            | 0.81972 |     |     |                        |                         |
| 5     | V\$OCT1_01 | 5       | 558 | (+) | NNNNWTATGCAAATNTNNN    | CAGAACATCCAAATTTCAA     |
| M0013 |            | 0.79615 |     |     |                        |                         |
| 6     | V\$OCT1_02 | 6       | 558 | (+) | NNGAATATKCANNNN        | CAGAACATCCAAATT         |
| M0019 |            | 0.82287 |     |     |                        |                         |
| 5     | V\$OCT1_Q6 | 1       | 560 | (+) | NNNNATGCAAATNAN        | GAACATCCAAATTTCTC       |
| M0016 |            |         |     |     |                        |                         |
| 2     | V\$OCT1_06 | 0.9375  | 561 | (-) | CWNAWTKWSATRYN         | AACATCCAAATTTCTC        |
| M0024 |            | 0.80093 |     |     |                        |                         |
| 8     | V\$OCT1_07 | 3       | 561 | (+) | TNTATGNTAATT           | AACATCCAAATT            |
| M0016 |            |         |     |     |                        |                         |
| 2     | V\$OCT1_06 | 0.825   | 566 | (+) | CWNAWTKWSATRYN         | CCAAATTTCAAGTT          |
| M0016 |            | 0.88554 |     |     |                        |                         |
| 2     | V\$OCT1_06 | 7       | 567 | (-) | CWNAWTKWSATRYN         | CAAATTTCAAGTTT          |
| M0013 |            | 0.79924 |     |     |                        |                         |
| 8     | V\$OCT1_04 | 7       | 571 | (-) | NNNNNNNWATGCAAATNNNWNW | TTTCAAGTTTATCATTTATCTTA |
| M0016 |            | 0.82148 |     |     |                        |                         |
| 2     | V\$OCT1_06 | 4       | 575 | (+) | CWNAWTKWSATRYN         | AAGTTTATCATTTA          |
| M0013 |            | 0.78690 |     |     |                        |                         |
| 8     | V\$OCT1_04 | 9       | 582 | (+) | NNNNNNNWATGCAAATNNNWNW | TCATTTATCTTATAATATTTCAA |
| M0013 |            |         |     |     |                        | TTATAATATTTCAAAAA-      |
| 8     | V\$OCT1_04 | 0.82476 | 591 | (+) | NNNNNNNWATGCAAATNNNWNW | TATTAA                  |
| M0013 |            | 0.78941 |     |     |                        | TTATAATATTTCAAAAA-      |
| 8     | V\$OCT1_04 | 9       | 591 | (-) | NNNNNNNWATGCAAATNNNWNW | TATTAA                  |
| M0016 |            | 0.90351 |     |     |                        |                         |
| 2     | V\$OCT1_06 | 6       | 595 | (-) | CWNAWTKWSATRYN         | AATATTTCAAAAAT          |
| M0016 |            | 0.81835 |     |     |                        |                         |
| 2     | V\$OCT1_06 | 9       | 597 | (-) | CWNAWTKWSATRYN         | TATTTCAAAAATAT          |
| M0013 |            | 0.87243 |     |     |                        | TCAAAAATATTAATAAGATA-   |
| 8     | V\$OCT1_04 | 8       | 601 | (+) | NNNNNNNWATGCAAATNNNWNW | CA                      |
| M0013 |            | 0.80112 |     |     |                        | CAAAAATATTAATAAGATA-    |
| 8     | V\$OCT1_04 | 9       | 602 | (-) | NNNNNNNWATGCAAATNNNWNW | CAT                     |
| M0013 |            | 0.74265 |     |     |                        |                         |
| 5     | V\$OCT1_01 | 5       | 603 | (+) | NNNNWTATGCAAATNTNNN    | AAAAATATTAATAAGATA      |
| M0013 |            | 0.80590 |     |     |                        |                         |
| 6     | V\$OCT1_02 | 1       | 603 | (+) | NNGAATATKCANNNN        | AAAAATATTAATAA          |
| M0024 |            | 0.83654 |     |     |                        |                         |
| 8     | V\$OCT1_07 | 9       | 608 | (-) | TNTATGNTAATT           | TATTAATAAGATA           |



|       |            |         |     |     |                        |                              |
|-------|------------|---------|-----|-----|------------------------|------------------------------|
| M0016 |            | 0.80390 |     |     |                        |                              |
| 2     | V\$OCT1_06 | 6       | 610 | (+) | CWNAWTKWSATRYN         | TTAAAATAGATACA               |
| M0016 |            | 0.91132 |     |     |                        |                              |
| 2     | V\$OCT1_06 | 8       | 619 | (+) | CWNAWTKWSATRYN         | ATACATGAAATACA               |
| M0016 |            | 0.94531 |     |     |                        |                              |
| 2     | V\$OCT1_06 | 2       | 620 | (-) | CWNAWTKWSATRYN         | TACATGAAATACAG               |
| M0016 |            | 0.80078 |     |     |                        |                              |
| 2     | V\$OCT1_06 | 1       | 637 | (-) | CWNAWTKWSATRYN         | TAAATTAAAGAGAA               |
| M0024 |            | 0.81725 |     |     |                        |                              |
| 8     | V\$OCT1_07 | 7       | 651 | (+) | TNTATGNTAATT           | AGTATTTTACTT                 |
| M0013 |            | 0.85657 |     |     |                        |                              |
| 7     | V\$OCT1_03 | 8       | 661 | (+) | NNNRTAATNANNN          | TTGGTAAAAA                   |
| M0016 |            | 0.81406 |     |     |                        |                              |
| 2     | V\$OCT1_06 | 2       | 672 | (-) | CWNAWTKWSATRYN         | AAAATTCTAGGTTG               |
| M0016 |            | 0.82148 |     |     |                        |                              |
| 2     | V\$OCT1_06 | 4       | 691 | (-) | CWNAWTKWSATRYN         | AGAATGCCAGGAAA               |
| M0016 |            | 0.82929 |     |     |                        |                              |
| 2     | V\$OCT1_06 | 7       | 709 | (+) | CWNAWTKWSATRYN         | AACAATGAAAAATG               |
| M0013 |            | 0.90833 |     |     |                        |                              |
| 7     | V\$OCT1_03 | 7       | 756 | (+) | NNNRTAATNANNN          | TCAGTAATGAAAT                |
| M0016 |            | 0.84257 |     |     |                        |                              |
| 2     | V\$OCT1_06 | 8       | 758 | (+) | CWNAWTKWSATRYN         | AGTAATGAAATGGC               |
| M0013 |            | 0.77012 |     |     |                        |                              |
| 5     | V\$OCT1_01 | 6       | 773 | (-) | NNNNWTATGCAAATNTNNN    | TAAAAATTGGTATATAAAA          |
| M0016 |            | 0.86054 |     |     |                        |                              |
| 2     | V\$OCT1_06 | 7       | 775 | (+) | CWNAWTKWSATRYN         | AAAATTGGTATATA               |
| M0013 |            | 0.80259 |     |     |                        |                              |
| 8     | V\$OCT1_04 | 3       | 776 | (+) | NNNNNNNWATGCAAATNNNWNW | AAAATTGGTATA-<br>TAAATGCTAGT |
| M0024 |            | 0.80602 |     |     |                        |                              |
| 8     | V\$OCT1_07 | 1       | 777 | (-) | TNTATGNTAATT           | AATTGGTATATA                 |
| M0016 |            | 0.84218 |     |     |                        |                              |
| 2     | V\$OCT1_06 | 7       | 782 | (+) | CWNAWTKWSATRYN         | GTATATAAAATGCT               |
| M0013 |            | 0.81618 |     |     |                        |                              |
| 8     | V\$OCT1_04 | 6       | 783 | (+) | NNNNNNNWATGCAAATNNNWNW | TATATAAAATGCTAG-<br>TTATAAAA |
| M0013 |            | 0.75238 |     |     |                        |                              |
| 5     | V\$OCT1_01 | 5       | 785 | (+) | NNNNWTATGCAAATNTNNN    | TATAAAATGCTAGTTATAA          |
| M0013 |            | 0.77449 |     |     |                        |                              |
| 6     | V\$OCT1_02 | 9       | 785 | (+) | NNGAATATKCANNNN        | TATAAAATGCTAGTT              |
| M0016 |            | 0.88245 |     |     |                        |                              |
| 1     | V\$OCT1_05 | 1       | 788 | (-) | MKNATTTGCATAYY         | AAAATGCTAGTTAT               |
| M0016 |            | 0.82695 |     |     |                        |                              |
| 2     | V\$OCT1_06 | 3       | 788 | (-) | CWNAWTKWSATRYN         | AAAATGCTAGTTAT               |
| M0024 |            | 0.82382 |     |     |                        |                              |
| 8     | V\$OCT1_07 | 9       | 788 | (+) | TNTATGNTAATT           | AAAATGCTAGTT                 |
| M0013 |            | 0.73769 |     |     |                        |                              |
| 5     | V\$OCT1_01 | 6       | 808 | (+) | NNNNWTATGCAAATNTNNN    | AACAAAATGCAATAATATC          |
| M0013 |            | 0.86302 |     |     |                        |                              |
| 6     | V\$OCT1_02 | 1       | 808 | (+) | NNGAATATKCANNNN        | AACAAAATGCAATAA              |
| M0016 |            | 0.81757 |     |     |                        |                              |
| 2     | V\$OCT1_06 | 8       | 810 | (+) | CWNAWTKWSATRYN         | CAAAATGCAATAAT               |
| M0016 |            |         |     |     |                        |                              |
| 2     | V\$OCT1_06 | 0.85    | 811 | (-) | CWNAWTKWSATRYN         | AAAATGCAATAATA               |
| M0013 |            | 0.78722 |     |     |                        |                              |
| 6     | V\$OCT1_02 | 3       | 818 | (+) | NNGAATATKCANNNN        | AATAATATCCTCCCT              |
| M0016 |            | 0.86054 |     |     |                        |                              |
| 2     | V\$OCT1_06 | 7       | 831 | (+) | CWNAWTKWSATRYN         | CTACATGTAATGAA               |
| M0019 |            | 0.79967 |     |     |                        |                              |
| 5     | V\$OCT1_Q6 | 2       | 831 | (+) | NNNNATGCAAATNAN        | CTACATGTAATGAAT              |
| M0016 |            | 0.93984 |     |     |                        |                              |
| 2     | V\$OCT1_06 | 4       | 832 | (-) | CWNAWTKWSATRYN         | TACATGTAATGAAT               |
| M0013 |            | 0.90912 |     |     |                        |                              |
| 7     | V\$OCT1_03 | 7       | 834 | (+) | NNNRTAATNANNN          | CATGTAATGAATT                |
| M0013 |            |         |     |     |                        |                              |
| 5     | V\$OCT1_01 | 0.73636 | 850 | (+) | NNNNWTATGCAAATNTNNN    | GGTATTATGCTCTTTTTTG          |
| M0013 |            |         |     |     |                        |                              |
| 6     | V\$OCT1_02 | 0.80157 | 850 | (+) | NNGAATATKCANNNN        | GGTATTATGCTCTTT              |

|       |            |         |      |     |                        |                         |
|-------|------------|---------|------|-----|------------------------|-------------------------|
| M0016 |            | 0.80585 |      |     |                        |                         |
| 2     | V\$OCT1_06 | 9       | 861  | (+) | CWNAWKWSATRYN          | CTTTTTGAAGTCT           |
| M0013 |            | 0.82831 |      |     |                        |                         |
| 8     | V\$OCT1_04 | 5       | 872  | (+) | NNNNNNNWATGCAAATNNWNNW | TCTTGACAATAAAAAATTTTTTA |
| M0013 |            |         |      |     |                        |                         |
| 7     | V\$OCT1_03 | 0.84196 | 874  | (+) | NNNRTAATNANNN          | TTGACAATAAAAA           |
| M0016 |            | 0.80820 |      |     |                        |                         |
| 2     | V\$OCT1_06 | 3       | 876  | (-) | CWNAWKWSATRYN          | GACAATAAAAAATTT         |
| M0013 |            | 0.77991 |      |     |                        |                         |
| 6     | V\$OCT1_02 | 3       | 908  | (-) | NNGAATATKCANNNN        | ATCTTGAATAAAGTG         |
| M0016 |            | 0.81601 |      |     |                        |                         |
| 2     | V\$OCT1_06 | 6       | 924  | (-) | CWNAWKWSATRYN          | AACAATTAAGAATT          |
| M0013 |            | 0.82664 |      |     |                        | ATTAAGAATTAGCATCCATGA-  |
| 8     | V\$OCT1_04 | 2       | 928  | (-) | NNNNNNNWATGCAAATNNWNNW | GA                      |
| M0013 |            | 0.80122 |      |     |                        |                         |
| 5     | V\$OCT1_01 | 1       | 930  | (-) | NNNNWTATGCAAATNTNNN    | TAAGAATTAGCATCCATGA     |
| M0019 |            | 0.83979 |      |     |                        |                         |
| 5     | V\$OCT1_Q6 | 3       | 932  | (-) | NNNNATGCAAATNAN        | AGAATTAGCATCCAT         |
| M0024 |            | 0.90481 |      |     |                        |                         |
| 8     | V\$OCT1_07 | 2       | 934  | (-) | TNTATGNTAATT           | AATTAGCATCCA            |
| M0013 |            | 0.73998 |      |     |                        |                         |
| 5     | V\$OCT1_01 | 5       | 950  | (+) | NNNNWTATGCAAATNTNNN    | AAAAATATAGAAAAATTTT     |
| M0013 |            | 0.78230 |      |     |                        | AAAAATATAGAAAAATTTTCC-  |
| 8     | V\$OCT1_04 | 9       | 950  | (+) | NNNNNNNWATGCAAATNNWNNW | TA                      |
| M0013 |            | 0.85424 |      |     |                        |                         |
| 8     | V\$OCT1_04 | 5       | 957  | (-) | NNNNNNNWATGCAAATNNWNNW | TAGAAAAATTTTCCTAATTTAGT |
| M0013 |            | 0.77203 |      |     |                        |                         |
| 5     | V\$OCT1_01 | 4       | 959  | (-) | NNNNWTATGCAAATNTNNN    | GAAAAATTTTCCTAATTTA     |
| M0013 |            | 0.75467 |      |     |                        |                         |
| 5     | V\$OCT1_01 | 4       | 961  | (+) | NNNNWTATGCAAATNTNNN    | AAAATTTTCCTAATTTAGT     |
| M0013 |            |         |      |     |                        |                         |
| 7     | V\$OCT1_03 | 0.84433 | 967  | (+) | NNNRTAATNANNN          | TTCCTAATTTAGT           |
| M0013 |            | 0.76020 |      |     |                        |                         |
| 5     | V\$OCT1_01 | 6       | 974  | (+) | NNNNWTATGCAAATNTNNN    | TTTAGTTTGAAAATCTGGG     |
| M0016 |            | 0.87343 |      |     |                        |                         |
| 2     | V\$OCT1_06 | 7       | 977  | (-) | CWNAWKWSATRYN          | AGTTTGAAAATCTG          |
| M0016 |            | 0.80078 |      |     |                        |                         |
| 2     | V\$OCT1_06 | 1       | 984  | (+) | CWNAWKWSATRYN          | AAATCTGGGATTGA          |
| M0013 |            | 0.80029 |      |     |                        |                         |
| 8     | V\$OCT1_04 | 3       | 1029 | (-) | NNNNNNNWATGCAAATNNWNNW | ACATTTTTTTTCAAGAACTTAT  |
| M0013 |            | 0.82120 |      |     |                        | AA-                     |
| 8     | V\$OCT1_04 | 5       | 1042 | (+) | NNNNNNNWATGCAAATNNWNNW | GAACTTATAAAAAATGCAACAA  |
| M0013 |            | 0.84116 |      |     |                        |                         |
| 7     | V\$OCT1_03 | 9       | 1047 | (+) | NNNRTAATNANNN          | CTTATAAAAAATGC          |
| M0013 |            | 0.82852 |      |     |                        | TTATAAAAAATGCAACAAACA   |
| 8     | V\$OCT1_04 | 4       | 1048 | (+) | NNNNNNNWATGCAAATNNWNNW | AA                      |
| M0013 |            | 0.84596 |      |     |                        |                         |
| 6     | V\$OCT1_02 | 6       | 1050 | (+) | NNGAATATKCANNNN        | ATAAAAAATGCAACAA        |
| M0016 |            | 0.89843 |      |     |                        |                         |
| 2     | V\$OCT1_06 | 7       | 1069 | (+) | CWNAWKWSATRYN          | AACCATTTAATACA          |
| M0016 |            | 0.82929 |      |     |                        |                         |
| 2     | V\$OCT1_06 | 7       | 1070 | (-) | CWNAWKWSATRYN          | ACCATTTAATACAT          |
| M0016 |            | 0.82890 |      |     |                        |                         |
| 2     | V\$OCT1_06 | 6       | 1073 | (+) | CWNAWKWSATRYN          | ATTTAATACATTTT          |
| M0016 |            | 0.80859 |      |     |                        |                         |
| 2     | V\$OCT1_06 | 4       | 1090 | (-) | CWNAWKWSATRYN          | CAAAATCAATAATG          |
| M0013 |            | 0.78000 |      |     |                        |                         |
| 8     | V\$OCT1_04 | 8       | 1093 | (+) | NNNNNNNWATGCAAATNNWNNW | AATCAATAATGTATTTTATTTA  |
| M0016 |            | 0.83437 |      |     |                        |                         |
| 2     | V\$OCT1_06 | 5       | 1097 | (+) | CWNAWKWSATRYN          | AATAATGTATTTTA          |
| M0016 |            | 0.82148 |      |     |                        |                         |
| 2     | V\$OCT1_06 | 4       | 1101 | (+) | CWNAWKWSATRYN          | ATGTATTTTATTTT          |
| M0016 |            | 0.81210 |      |     |                        |                         |
| 2     | V\$OCT1_06 | 9       | 1102 | (-) | CWNAWKWSATRYN          | TGTATTTTATTTTA          |
| M0024 |            | 0.83654 |      |     |                        |                         |
| 8     | V\$OCT1_07 | 9       | 1102 | (+) | TNTATGNTAATT           | TGTATTTTATTT            |

|       |            |         |      |     |                        |                       |
|-------|------------|---------|------|-----|------------------------|-----------------------|
| M0016 |            | 0.80585 |      |     |                        |                       |
| 2     | V\$OCT1_06 | 9       | 1173 | (-) | CWNAWTKWSATRYN         | TAAATTACCAAGAG        |
| M0024 |            | 0.79436 |      |     |                        |                       |
| 8     | V\$OCT1_07 | 1       | 1175 | (-) | TNTATGNTAATT           | AATTACCAAGAG          |
| M0013 |            | 0.80071 |      |     |                        | ACAGTTCTATGTAGAGAAAA- |
| 8     | V\$OCT1_04 | 1       | 1195 | (+) | NNNNNNNWATGCAAATNNNWNW | TAA                   |
| M0013 |            | 0.79549 |      |     |                        |                       |
| 5     | V\$OCT1_01 | 8       | 1209 | (-) | NNNNWTATGCAAATNTNNN    | AGAAAATAAGCATAGTGTA   |
| M0013 |            |         |      |     |                        |                       |
| 6     | V\$OCT1_02 | 0.77098 | 1210 | (+) | NNGAATATKCANNNN        | GAAAATAAGCATAGT       |
| M0013 |            | 0.77558 |      |     |                        |                       |
| 6     | V\$OCT1_02 | 2       | 1213 | (-) | NNGAATATKCANNNN        | AATAAGCATAGTGTA       |
| M0024 |            | 0.88276 |      |     |                        |                       |
| 8     | V\$OCT1_07 | 4       | 1213 | (-) | TNTATGNTAATT           | AATAAGCATAGT          |
| M0013 |            | 0.84630 |      |     |                        |                       |
| 7     | V\$OCT1_03 | 6       | 1234 | (-) | NNNRATAATNANNN         | CTAAAATTATGTG         |
| M0016 |            | 0.83398 |      |     |                        |                       |
| 2     | V\$OCT1_06 | 4       | 1238 | (+) | CWNAWTKWSATRYN         | AATTATGTGAGACA        |
| M0016 |            | 0.82539 |      |     |                        |                       |
| 2     | V\$OCT1_06 | 1       | 1257 | (-) | CWNAWTKWSATRYN         | GAGATGACATTAGG        |
| M0013 |            | 0.86527 |      |     |                        |                       |
| 7     | V\$OCT1_03 | 1       | 1260 | (-) | NNNRATAATNANNN         | ATGACATTAGGCA         |
| M0016 |            | 0.87343 |      |     |                        |                       |
| 2     | V\$OCT1_06 | 7       | 1323 | (-) | CWNAWTKWSATRYN         | AACATCTCGATCAG        |
| M0013 |            | 0.78519 |      |     |                        |                       |
| 5     | V\$OCT1_01 | 6       | 1348 | (+) | NNNNWTATGCAAATNTNNN    | GAAGAAATGCTAAAAATGAA  |
| M0016 |            | 0.83476 |      |     |                        |                       |
| 2     | V\$OCT1_06 | 6       | 1351 | (-) | CWNAWTKWSATRYN         | GAAATGCTAAAAATG       |
| M0016 |            | 0.80078 |      |     |                        |                       |
| 2     | V\$OCT1_06 | 1       | 1382 | (-) | CWNAWTKWSATRYN         | GAAATAAAAGATAT        |
| M0013 |            | 0.82371 |      |     |                        | ATAAAAGATATGAATAAGA-  |
| 8     | V\$OCT1_04 | 4       | 1385 | (-) | NNNNNNNWATGCAAATNNNWNW | CAAA                  |
| M0013 |            | 0.82538 |      |     |                        | TAAAAGATATGAATAAGA-   |
| 8     | V\$OCT1_04 | 7       | 1386 | (+) | NNNNNNNWATGCAAATNNNWNW | CAAAA                 |
| M0013 |            | 0.73216 |      |     |                        |                       |
| 5     | V\$OCT1_01 | 3       | 1387 | (-) | NNNNWTATGCAAATNTNNN    | AAAAGATATGAATAAGACA   |
| M0019 |            | 0.79994 |      |     |                        |                       |
| 5     | V\$OCT1_Q6 | 5       | 1388 | (+) | NNNNATGCAAATNAN        | AAAGATATGAATAAG       |
| M0013 |            | 0.78532 |      |     |                        |                       |
| 6     | V\$OCT1_02 | 8       | 1391 | (-) | NNGAATATKCANNNN        | GATATGAATAAGACA       |
| M0016 |            | 0.80039 |      |     |                        |                       |
| 2     | V\$OCT1_06 | 1       | 1391 | (-) | CWNAWTKWSATRYN         | GATATGAATAAGAC        |
| M0016 |            | 0.82617 |      |     |                        |                       |
| 2     | V\$OCT1_06 | 2       | 1397 | (-) | CWNAWTKWSATRYN         | AATAAGACAAAAAT        |
| M0013 |            | 0.83134 |      |     |                        |                       |
| 6     | V\$OCT1_02 | 8       | 1403 | (+) | NNGAATATKCANNNN        | ACAAAAATTCATGAA       |
| M0016 |            |         |      |     |                        |                       |
| 2     | V\$OCT1_06 | 0.825   | 1404 | (+) | CWNAWTKWSATRYN         | CAAAAATTCATGAA        |
| M0013 |            | 0.81890 |      |     |                        | AAAAATTCATGAAATCAC-   |
| 8     | V\$OCT1_04 | 4       | 1405 | (+) | NNNNNNNWATGCAAATNNNWNW | TTAG                  |
| M0013 |            | 0.73063 |      |     |                        |                       |
| 5     | V\$OCT1_01 | 7       | 1407 | (+) | NNNNWTATGCAAATNTNNN    | AAATTCATGAAAATCACTT   |
| M0016 |            | 0.80820 |      |     |                        |                       |
| 2     | V\$OCT1_06 | 3       | 1409 | (+) | CWNAWTKWSATRYN         | ATTCATGAAAATCA        |
| M0019 |            | 0.88755 |      |     |                        |                       |
| 5     | V\$OCT1_Q6 | 5       | 1409 | (+) | NNNNATGCAAATNAN        | ATTCATGAAAATCAC       |
| M0016 |            | 0.86054 |      |     |                        |                       |
| 2     | V\$OCT1_06 | 7       | 1410 | (-) | CWNAWTKWSATRYN         | TTCATGAAAATCAC        |
| M0016 |            | 0.80820 |      |     |                        |                       |
| 2     | V\$OCT1_06 | 3       | 1416 | (-) | CWNAWTKWSATRYN         | AAAATCACTTAGTT        |
| M0013 |            |         |      |     |                        | TAGAGAAAAGATAAAAA-    |
| 8     | V\$OCT1_04 | 0.7867  | 1433 | (+) | NNNNNNNWATGCAAATNNNWNW | TAAAGT                |
| M0016 |            | 0.83984 |      |     |                        |                       |
| 2     | V\$OCT1_06 | 4       | 1445 | (-) | CWNAWTKWSATRYN         | AAAAATAAAGTATG        |
| M0016 |            | 0.82382 |      |     |                        |                       |
| 2     | V\$OCT1_06 | 8       | 1452 | (+) | CWNAWTKWSATRYN         | AAGTATGACCTTCT        |

|       |            |         |      |     |                         |                              |
|-------|------------|---------|------|-----|-------------------------|------------------------------|
| M0016 |            | 0.85507 |      |     |                         |                              |
| 2     | V\$OCT1_06 | 8       | 1453 | (-) | CWNAWTKWSATRYN          | AGTATGACCTTCTT               |
| M0013 |            | 0.78084 |      |     |                         |                              |
| 8     | V\$OCT1_04 | 5       | 1456 | (+) | NNNNNNNNWATGCAAATNNNWNW | ATGACCTTCTTCATATACATTGT      |
| M0019 |            | 0.79394 |      |     |                         |                              |
| 5     | V\$OCT1_Q6 | 1       | 1461 | (-) | NNNNATGCAAATNAN         | CTTCTTCATATACAT              |
| M0016 |            | 0.82656 |      |     |                         |                              |
| 2     | V\$OCT1_06 | 2       | 1522 | (+) | CWNAWTKWSATRYN          | GAAACATTAATATT               |
| M0013 |            | 0.77991 |      |     |                         |                              |
| 6     | V\$OCT1_02 | 3       | 1524 | (-) | NNGAATATKCANNNN         | AACATTAATATTTTG              |
| M0016 |            | 0.84726 |      |     |                         |                              |
| 2     | V\$OCT1_06 | 6       | 1524 | (-) | CWNAWTKWSATRYN          | AACATTAATATTTT               |
| M0016 |            | 0.82148 |      |     |                         |                              |
| 2     | V\$OCT1_06 | 4       | 1556 | (-) | CWNAWTKWSATRYN          | AGAATCTAAGCGAT               |
| M0013 |            | 0.80133 |      |     |                         |                              |
| 8     | V\$OCT1_04 | 8       | 1571 | (-) | NNNNNNNNWATGCAAATNNNWNW | TCTGGCAATAAAAAATAATAA-<br>TA |
| M0013 |            | 0.85302 |      |     |                         |                              |
| 7     | V\$OCT1_03 | 3       | 1572 | (+) | NNNRTAATNANNN           | CTGGCAATAAAAA                |
| M0019 |            |         |      |     |                         |                              |
| 5     | V\$OCT1_Q6 | 0.81905 | 1574 | (+) | NNNNATGCAAATNAN         | GGCAATAAAAAATAAT             |
| M0024 |            | 0.81238 |      |     |                         |                              |
| 8     | V\$OCT1_07 | 1       | 1577 | (-) | TNTATGNTAATT            | AATAAAAAATAAT                |
| M0013 |            |         |      |     |                         |                              |
| 8     | V\$OCT1_04 | 0.81514 | 1579 | (+) | NNNNNNNNWATGCAAATNNNWNW | TAAAAATAA-<br>TAAATATATATTTT |
| M0013 |            | 0.79778 |      |     |                         |                              |
| 8     | V\$OCT1_04 | 3       | 1580 | (-) | NNNNNNNNWATGCAAATNNNWNW | AAAAATAA-<br>TAAATATATATTTT  |
| M0013 |            | 0.84709 |      |     |                         |                              |
| 7     | V\$OCT1_03 | 6       | 1581 | (+) | NNNRTAATNANNN           | AAAATAATAAATA                |
| M0016 |            | 0.82890 |      |     |                         |                              |
| 2     | V\$OCT1_06 | 6       | 1582 | (+) | CWNAWTKWSATRYN          | AAATAATAAATATA               |
| M0013 |            | 0.81304 |      |     |                         |                              |
| 8     | V\$OCT1_04 | 9       | 1583 | (+) | NNNNNNNNWATGCAAATNNNWNW | AATAATAAATATATATTTTTTAA      |
| M0016 |            | 0.81328 |      |     |                         |                              |
| 2     | V\$OCT1_06 | 1       | 1583 | (-) | CWNAWTKWSATRYN          | AATAATAAATATAT               |
| M0013 |            | 0.85381 |      |     |                         |                              |
| 7     | V\$OCT1_03 | 3       | 1584 | (+) | NNNRTAATNANNN           | ATAATAAATATAT                |
| M0013 |            | 0.81827 |      |     |                         |                              |
| 8     | V\$OCT1_04 | 7       | 1584 | (-) | NNNNNNNNWATGCAAATNNNWNW | ATAATAAATATATATTTTTTAAT      |
| M0024 |            | 0.79351 |      |     |                         |                              |
| 8     | V\$OCT1_07 | 3       | 1586 | (-) | TNTATGNTAATT            | AATAAATATATA                 |
| M0013 |            | 0.84065 |      |     |                         |                              |
| 8     | V\$OCT1_04 | 2       | 1592 | (-) | NNNNNNNNWATGCAAATNNNWNW | TATATATTTTTTAATAAGTGAAT      |
| M0013 |            | 0.78021 |      |     |                         |                              |
| 8     | V\$OCT1_04 | 7       | 1620 | (-) | NNNNNNNNWATGCAAATNNNWNW | ACTTAATTTTTCTGTAAATATCT      |
| M0013 |            | 0.83291 |      |     |                         |                              |
| 8     | V\$OCT1_04 | 5       | 1623 | (+) | NNNNNNNNWATGCAAATNNNWNW | TAATTTTTCTGTAAATATCTGTA      |
| M0013 |            | 0.79378 |      |     |                         |                              |
| 5     | V\$OCT1_01 | 1       | 1625 | (+) | NNNNWTATGCAAATNTNNN     | ATTTTTCTGTAAATATCTG          |
| M0016 |            | 0.86835 |      |     |                         |                              |
| 2     | V\$OCT1_06 | 9       | 1684 | (+) | CWNAWTKWSATRYN          | GTGAATGAGATGAA               |
| M0016 |            | 0.84765 |      |     |                         |                              |
| 2     | V\$OCT1_06 | 6       | 1690 | (-) | CWNAWTKWSATRYN          | GAGATGAAAAAGAG               |
| M0024 |            | 0.80029 |      |     |                         |                              |
| 8     | V\$OCT1_07 | 7       | 1706 | (-) | TNTATGNTAATT            | AAGTAGGATATA                 |
| M0016 |            | 0.82148 |      |     |                         |                              |
| 2     | V\$OCT1_06 | 4       | 1711 | (+) | CWNAWTKWSATRYN          | GGATATAGGATGTT               |
| M0013 |            | 0.73407 |      |     |                         |                              |
| 5     | V\$OCT1_01 | 1       | 1717 | (-) | NNNNWTATGCAAATNTNNN     | AGGATGTTAGCAGAAAAACA         |
| M0016 |            | 0.86289 |      |     |                         |                              |
| 2     | V\$OCT1_06 | 1       | 1760 | (+) | CWNAWTKWSATRYN          | TAACTTGAAATGTA               |
| M0013 |            | 0.79130 |      |     |                         |                              |
| 8     | V\$OCT1_04 | 1       | 1761 | (+) | NNNNNNNNWATGCAAATNNNWNW | AACTTGAAATGTAAGAT-<br>TAATGA |
| M0016 |            | 0.83710 |      |     |                         |                              |
| 2     | V\$OCT1_06 | 9       | 1766 | (-) | CWNAWTKWSATRYN          | GAAATGTAAGATTA               |
| M0013 |            | 0.86171 |      |     |                         |                              |
| 7     | V\$OCT1_03 | 5       | 1774 | (+) | NNNRTAATNANNN           | AGATTAATGAGTA                |

|       |            |         |      |     |                        |                              |
|-------|------------|---------|------|-----|------------------------|------------------------------|
| M0013 |            | 0.77585 |      |     |                        |                              |
| 6     | V\$OCT1_02 | 3       | 1777 | (-) | NNGAATATKCANNNN        | TTAATGAGTAATAGT              |
| M0013 |            |         |      |     |                        |                              |
| 7     | V\$OCT1_03 | 0.8629  | 1781 | (+) | NNNRTAATNANNN          | TGAGTAATAGTAA                |
| M0013 |            | 0.77985 |      |     |                        |                              |
| 5     | V\$OCT1_01 | 5       | 1805 | (+) | NNNNWTATGCAAATNTNNN    | GGCCATATGATAAAATGTT          |
| M0016 |            | 0.86054 |      |     |                        |                              |
| 2     | V\$OCT1_06 | 7       | 1808 | (-) | CWNAWTKWSATRYN         | CATATGATAAAATG               |
| M0013 |            | 0.83479 |      |     |                        |                              |
| 8     | V\$OCT1_04 | 7       | 1811 | (+) | NNNNNNNWATGCAAATNNNWNW | ATGATAAAATGTTTATTAATATT      |
| M0013 |            | 0.78272 |      |     |                        |                              |
| 8     | V\$OCT1_04 | 7       | 1812 | (-) | NNNNNNNWATGCAAATNNNWNW | TGATAAAATGTTTATTAATATTT      |
| M0013 |            | 0.79464 |      |     |                        |                              |
| 8     | V\$OCT1_04 | 7       | 1816 | (-) | NNNNNNNWATGCAAATNNNWNW | AAAATGTTTATTAATATTTTTCT      |
| M0024 |            | 0.81704 |      |     |                        |                              |
| 8     | V\$OCT1_07 | 5       | 1816 | (+) | TNTATGNTAATT           | AAAATGTTTATT                 |
| M0013 |            | 0.86487 |      |     |                        |                              |
| 7     | V\$OCT1_03 | 6       | 1817 | (-) | NNNRTAATNANNN          | AAATGTTTATTA                 |
| M0013 |            | 0.87892 |      |     |                        |                              |
| 8     | V\$OCT1_04 | 1       | 1817 | (+) | NNNNNNNWATGCAAATNNNWNW | AAATGTTTATTAATATTTTTCTA      |
| M0013 |            | 0.79318 |      |     |                        |                              |
| 8     | V\$OCT1_04 | 3       | 1818 | (-) | NNNNNNNWATGCAAATNNNWNW | AATGTTTATTAATATTTTTCTAA      |
| M0013 |            | 0.80102 |      |     |                        |                              |
| 6     | V\$OCT1_02 | 9       | 1822 | (-) | NNGAATATKCANNNN        | TTTATTAATATTTTT              |
| M0013 |            | 0.79101 |      |     |                        |                              |
| 6     | V\$OCT1_02 | 2       | 1825 | (+) | NNGAATATKCANNNN        | ATTAATATTTTTCTA              |
| M0013 |            | 0.78824 |      |     |                        |                              |
| 5     | V\$OCT1_01 | 9       | 1934 | (-) | NNNNWTATGCAAATNTNNN    | TGGACATTTGTATTATACA          |
| M0016 |            | 0.80585 |      |     |                        |                              |
| 2     | V\$OCT1_06 | 9       | 1953 | (+) | CWNAWTKWSATRYN         | CTATCTTTGGTCC                |
| M0013 |            | 0.85657 |      |     |                        |                              |
| 7     | V\$OCT1_03 | 8       | 1966 | (+) | NNNRTAATNANNN          | CTTGTAAGGGAA                 |
| M0013 |            | 0.74914 |      |     |                        |                              |
| 5     | V\$OCT1_01 | 2       | 1978 | (-) | NNNNWTATGCAAATNTNNN    | AGTAATTTTACTTAAATAA          |
| M0013 |            | 0.82099 |      |     |                        |                              |
| 8     | V\$OCT1_04 | 5       | 1979 | (+) | NNNNNNNWATGCAAATNNNWNW | GTAATTTTACTTAAATAA-<br>GAAAA |
| M0013 |            | 0.81346 |      |     |                        |                              |
| 8     | V\$OCT1_04 | 7       | 1980 | (-) | NNNNNNNWATGCAAATNNNWNW | TAATTTTACTTAAATAA-<br>GAAAA  |
| M0013 |            | 0.80886 |      |     |                        |                              |
| 8     | V\$OCT1_04 | 7       | 1987 | (+) | NNNNNNNWATGCAAATNNNWNW | ACTTAAATAAGAAAA-<br>TAGATTGA |
| M0013 |            | 0.75467 |      |     |                        |                              |
| 5     | V\$OCT1_01 | 4       | 1989 | (+) | NNNNWTATGCAAATNTNNN    | TTAAATAAGAAAAATAGATT         |
| M0016 |            | 0.82929 |      |     |                        |                              |
| 2     | V\$OCT1_06 | 7       | 2070 | (+) | CWNAWTKWSATRYN         | CATCCTTGCTGTC                |
| M0013 |            |         |      |     |                        |                              |
| 8     | V\$OCT1_04 | 0.79611 | 2118 | (+) | NNNNNNNWATGCAAATNNNWNW | AGAAAAAATGTTGAAA-<br>TAAATA  |
| M0013 |            | 0.79025 |      |     |                        |                              |
| 8     | V\$OCT1_04 | 5       | 2120 | (+) | NNNNNNNWATGCAAATNNNWNW | AAAAAATGTTGAAATAAA-<br>TAAG  |
| M0016 |            | 0.84765 |      |     |                        |                              |
| 2     | V\$OCT1_06 | 6       | 2168 | (-) | CWNAWTKWSATRYN         | AAAATCGCATTACC               |
| M0013 |            | 0.87514 |      |     |                        |                              |
| 7     | V\$OCT1_03 | 8       | 2171 | (-) | NNNRTAATNANNN          | ATCGCATTACCAA                |
| M0013 |            | 0.79276 |      |     |                        |                              |
| 8     | V\$OCT1_04 | 5       | 2184 | (+) | NNNNNNNWATGCAAATNNNWNW | CATCATAAATGTATAAA-<br>TAATGC |
| M0019 |            | 0.81659 |      |     |                        |                              |
| 5     | V\$OCT1_Q6 | 4       | 2190 | (+) | NNNNATGCAAATNAN        | AAATGTATAAATAAT              |
| M0013 |            | 0.79841 |      |     |                        |                              |
| 8     | V\$OCT1_04 | 1       | 2195 | (+) | NNNNNNNWATGCAAATNNNWNW | TATAAA-<br>TAATGCACAATCTCAGA |
| M0013 |            | 0.78316 |      |     |                        |                              |
| 6     | V\$OCT1_02 | 2       | 2200 | (-) | NNGAATATKCANNNN        | ATAATGCACAATCTC              |
| M0016 |            | 0.80429 |      |     |                        |                              |
| 2     | V\$OCT1_06 | 7       | 2206 | (+) | CWNAWTKWSATRYN         | CACAATCTCAGATT               |
| M0016 |            | 0.82148 |      |     |                        |                              |
| 2     | V\$OCT1_06 | 4       | 2207 | (-) | CWNAWTKWSATRYN         | ACAATCTCAGATTT               |
| M0016 |            | 0.84765 |      |     |                        |                              |
| 2     | V\$OCT1_06 | 6       | 2208 | (+) | CWNAWTKWSATRYN         | CAATCTCAGATTTA               |

|       |            |         |      |     |                         |                         |  |
|-------|------------|---------|------|-----|-------------------------|-------------------------|--|
| M0016 |            | 0.85507 |      |     |                         |                         |  |
| 2     | V\$OCT1_06 | 8       | 2220 | (+) | CWNAWTKWSATRYN          | TATTTTTTAATGCT          |  |
| M0013 |            | 0.82873 |      |     |                         | ATTTTTTAATGCTAA-        |  |
| 8     | V\$OCT1_04 | 3       | 2221 | (+) | NNNNNNNWWATGCAAATNNNWNW | GAAAGTCA                |  |
| M0016 |            | 0.84218 |      |     |                         |                         |  |
| 2     | V\$OCT1_06 | 7       | 2234 | (+) | CWNAWTKWSATRYN          | AAGAAAGTCATTTA          |  |
| M0016 |            | 0.85507 |      |     |                         |                         |  |
| 2     | V\$OCT1_06 | 8       | 2235 | (-) | CWNAWTKWSATRYN          | AGAAAGTCATTAT           |  |
| M0024 |            | 0.79245 |      |     |                         |                         |  |
| 8     | V\$OCT1_07 | 3       | 2244 | (+) | TNTATGNTAATT            | TTTATGTTTCATC           |  |
| M0016 |            | 0.80859 |      |     |                         |                         |  |
| 2     | V\$OCT1_06 | 4       | 2326 | (-) | CWNAWTKWSATRYN          | TACCTTCAATTCCT          |  |
| M0013 |            | 0.85420 |      |     |                         |                         |  |
| 7     | V\$OCT1_03 | 8       | 2335 | (+) | NNNRTAATNANNN           | TTCCTAAAGAAAA           |  |
| M0013 |            | 0.77693 |      |     |                         |                         |  |
| 6     | V\$OCT1_02 | 6       | 2403 | (-) | NNGAATATKCANNNN         | AAAATGAGTAATAGT         |  |
| M0013 |            | 0.81430 |      |     |                         | ACAATTGCACGCAT-         |  |
| 8     | V\$OCT1_04 | 4       | 2426 | (+) | NNNNNNNWWATGCAAATNNNWNW | ATACAATCT               |  |
| M0013 |            | 0.84271 |      |     |                         |                         |  |
| 6     | V\$OCT1_02 | 8       | 2431 | (-) | NNGAATATKCANNNN         | TGCACGCATATACAA         |  |
| M0013 |            | 0.80563 |      |     |                         |                         |  |
| 6     | V\$OCT1_02 | 1       | 2434 | (+) | NNGAATATKCANNNN         | ACGCATATACAATCT         |  |
| M0013 |            | 0.79192 |      |     |                         | ATATACAATCTAGA-         |  |
| 8     | V\$OCT1_04 | 8       | 2438 | (-) | NNNNNNNWWATGCAAATNNNWNW | TAAATATAT               |  |
| M0013 |            | 0.85815 |      |     |                         |                         |  |
| 7     | V\$OCT1_03 | 9       | 2448 | (+) | NNNRTAATNANNN           | TAGATAAATATAT           |  |
| M0016 |            |         |      |     |                         |                         |  |
| 2     | V\$OCT1_06 | 0.80625 | 2461 | (-) | CWNAWTKWSATRYN          | CTTATCCCAGTGAT          |  |
| M0016 |            | 0.84218 |      |     |                         |                         |  |
| 2     | V\$OCT1_06 | 7       | 2469 | (+) | CWNAWTKWSATRYN          | AGTGATGAAATATT          |  |
| M0013 |            | 0.78021 |      |     |                         |                         |  |
| 8     | V\$OCT1_04 | 7       | 2473 | (-) | NNNNNNNWWATGCAAATNNNWNW | ATGAAATATTTGTATCTCTACT  |  |
| M0013 |            | 0.74780 |      |     |                         |                         |  |
| 5     | V\$OCT1_01 | 6       | 2475 | (-) | NNNNWTATGCAAATNTNNN     | GAAATATTTGTATCTCTTA     |  |
| M0019 |            | 0.79721 |      |     |                         |                         |  |
| 5     | V\$OCT1_Q6 | 6       | 2477 | (-) | NNNNATGCAAATNAN         | AATATTTGTATCTCT         |  |
| M0016 |            | 0.85507 |      |     |                         |                         |  |
| 2     | V\$OCT1_06 | 8       | 2483 | (-) | CWNAWTKWSATRYN          | TGTATCTCTTACTG          |  |
| M0016 |            | 0.85781 |      |     |                         |                         |  |
| 2     | V\$OCT1_06 | 2       | 2545 | (+) | CWNAWTKWSATRYN          | GAGGATGACATATC          |  |
| M0013 |            | 0.79820 |      |     |                         | CAACAATAATACATATGTTCA-  |  |
| 8     | V\$OCT1_04 | 2       | 2562 | (+) | NNNNNNNWWATGCAAATNNNWNW | TA                      |  |
| M0016 |            | 0.86289 |      |     |                         |                         |  |
| 2     | V\$OCT1_06 | 1       | 2565 | (+) | CWNAWTKWSATRYN          | CAATAATACATATG          |  |
| M0013 |            | 0.79422 |      |     |                         |                         |  |
| 8     | V\$OCT1_04 | 8       | 2568 | (+) | NNNNNNNWWATGCAAATNNNWNW | TAATACATATGTTCATAATTATA |  |
| M0013 |            | 0.80991 |      |     |                         | AATACAT-                |  |
| 8     | V\$OCT1_04 | 2       | 2569 | (-) | NNNNNNNWWATGCAAATNNNWNW | ATGTTCATAATTATAA        |  |
| M0013 |            | 0.74761 |      |     |                         |                         |  |
| 5     | V\$OCT1_01 | 5       | 2570 | (+) | NNNNWTATGCAAATNTNNN     | ATACATATGTTCATAATTA     |  |
| M0013 |            |         |      |     |                         |                         |  |
| 8     | V\$OCT1_04 | 0.80803 | 2570 | (+) | NNNNNNNWWATGCAAATNNNWNW | ATACATATGTTCATAATTATAAT |  |
| M0013 |            | 0.79091 |      |     |                         |                         |  |
| 5     | V\$OCT1_01 | 9       | 2571 | (-) | NNNNWTATGCAAATNTNNN     | TACATATGTTCATAATTAT     |  |
| M0016 |            | 0.80937 |      |     |                         |                         |  |
| 2     | V\$OCT1_06 | 5       | 2573 | (+) | CWNAWTKWSATRYN          | CATATGTTCATAAT          |  |
| M0013 |            | 0.80363 |      |     |                         | ATATGTTCATAATTATAA-     |  |
| 8     | V\$OCT1_04 | 9       | 2574 | (+) | NNNNNNNWWATGCAAATNNNWNW | TAAAA                   |  |
| M0013 |            | 0.80112 |      |     |                         | TGTTCATAATTATAA-        |  |
| 8     | V\$OCT1_04 | 9       | 2577 | (+) | NNNNNNNWWATGCAAATNNNWNW | TAAAAAGT                |  |
| M0013 |            | 0.94350 |      |     |                         |                         |  |
| 7     | V\$OCT1_03 | 1       | 2579 | (+) | NNNRTAATNANNN           | TTCATAATTATAA           |  |
| M0013 |            | 0.91426 |      |     |                         |                         |  |
| 7     | V\$OCT1_03 | 3       | 2580 | (-) | NNNRTAATNANNN           | TCATAATTATAAT           |  |
| M0024 |            | 0.85796 |      |     |                         |                         |  |
| 8     | V\$OCT1_07 | 1       | 2584 | (-) | TNTATGNTAATT            | AATTATAATAAA            |  |

|       |            |         |      |     |                         |                       |
|-------|------------|---------|------|-----|-------------------------|-----------------------|
| M0013 |            | 0.88463 |      |     |                         |                       |
| 7     | V\$OCT1_03 | 1       | 2585 | (+) | NNNRTAATNANNN           | ATTATAATAAAAA         |
| M0016 |            | 0.82656 |      |     |                         |                       |
| 2     | V\$OCT1_06 | 2       | 2587 | (-) | CWNAWTKWSATRYN          | TATAATAAAAAAGTG       |
| M0013 |            | 0.79171 |      |     |                         | AAGTGTTTCAG-          |
| 8     | V\$OCT1_04 | 9       | 2596 | (+) | NNNNNNNNWATGCAAATNNNWNW | TAAAAATTAATAAT        |
| M0013 |            | 0.82245 |      |     |                         | CAGTAAAAATTAATA-      |
| 8     | V\$OCT1_04 | 9       | 2603 | (+) | NNNNNNNNWATGCAAATNNNWNW | TAACTCCT              |
| M0013 |            | 0.83626 |      |     |                         | AGTAAAAATTAATA-       |
| 8     | V\$OCT1_04 | 1       | 2604 | (-) | NNNNNNNNWATGCAAATNNNWNW | TAACTCCTT             |
| M0013 |            | 0.75848 |      |     |                         |                       |
| 5     | V\$OCT1_01 | 9       | 2606 | (-) | NNNNWTATGCAAATNTNNN     | TAAAAATTAATAACTCC     |
| M0019 |            | 0.83351 |      |     |                         |                       |
| 5     | V\$OCT1_Q6 | 5       | 2607 | (+) | NNNNATGCAAATNAN         | AAAAATTAATAAAC        |
| M0016 |            | 0.90898 |      |     |                         |                       |
| 2     | V\$OCT1_06 | 4       | 2608 | (-) | CWNAWTKWSATRYN          | AAAATTAATAAAC         |
| M0024 |            | 0.89654 |      |     |                         |                       |
| 8     | V\$OCT1_07 | 4       | 2610 | (-) | TNTATGNTAATT            | AATTAATAAAC           |
| M0013 |            | 0.85736 |      |     |                         |                       |
| 7     | V\$OCT1_03 | 9       | 2646 | (-) | NNNRTAATNANNN           | TCTTCATTAAGGT         |
| M0013 |            | 0.78795 |      |     |                         | CTTCATTAAGGTAAAA      |
| 8     | V\$OCT1_04 | 5       | 2647 | (+) | NNNNNNNNWATGCAAATNNNWNW | CAAAAA                |
| M0016 |            | 0.80546 |      |     |                         | T                     |
| 2     | V\$OCT1_06 | 9       | 2658 | (-) | CWNAWTKWSATRYN          | TAAAACAAAAAATAT       |
| M0013 |            | 0.79903 |      |     |                         | CTATTAATTTAAAA-       |
| 8     | V\$OCT1_04 | 8       | 2683 | (-) | NNNNNNNNWATGCAAATNNNWNW | TACTCTCAA             |
| M0016 |            | 0.83945 |      |     |                         |                       |
| 2     | V\$OCT1_06 | 3       | 2685 | (+) | CWNAWTKWSATRYN          | ATTAATTTAAAAATA       |
| M0016 |            | 0.81367 |      |     |                         |                       |
| 2     | V\$OCT1_06 | 2       | 2686 | (-) | CWNAWTKWSATRYN          | TTAATTTAAAAATAC       |
| M0016 |            | 0.80585 |      |     |                         |                       |
| 2     | V\$OCT1_06 | 9       | 2687 | (-) | CWNAWTKWSATRYN          | TAATTTAAAATACT        |
| M0024 |            | 0.81725 |      |     |                         |                       |
| 8     | V\$OCT1_07 | 7       | 2689 | (-) | TNTATGNTAATT            | ATTTAAAATACT          |
| M0016 |            | 0.86835 |      |     |                         |                       |
| 2     | V\$OCT1_06 | 9       | 2710 | (-) | CWNAWTKWSATRYN          | CGTATAACATTTTT        |
| M0016 |            | 0.84765 |      |     |                         |                       |
| 2     | V\$OCT1_06 | 6       | 2715 | (+) | CWNAWTKWSATRYN          | AACATTTTTATTTT        |
| M0013 |            | 0.83751 |      |     |                         |                       |
| 8     | V\$OCT1_04 | 6       | 2718 | (-) | NNNNNNNNWATGCAAATNNNWNW | ATTTTTATTTTCAGATTGTGA |
| M0016 |            | 0.80820 |      |     |                         |                       |
| 2     | V\$OCT1_06 | 3       | 2723 | (-) | CWNAWTKWSATRYN          | TATTTTTCAGATTT        |
| M0016 |            | 0.81367 |      |     |                         |                       |
| 2     | V\$OCT1_06 | 2       | 2724 | (+) | CWNAWTKWSATRYN          | ATTTTTCAGATTTG        |
| M0016 |            | 0.80546 |      |     |                         |                       |
| 2     | V\$OCT1_06 | 9       | 2731 | (+) | CWNAWTKWSATRYN          | AGATTTGTGAAATA        |
| M0016 |            | 0.83671 |      |     |                         |                       |
| 2     | V\$OCT1_06 | 9       | 2760 | (-) | CWNAWTKWSATRYN          | AGCAAGTAAAAGTT        |
| M0013 |            | 0.79276 |      |     |                         | AGTTAGGTAGGAAAAA-     |
| 8     | V\$OCT1_04 | 5       | 2770 | (+) | NNNNNNNNWATGCAAATNNNWNW | TATTTAA               |
| M0016 |            | 0.81328 |      |     |                         |                       |
| 2     | V\$OCT1_06 | 1       | 2775 | (-) | CWNAWTKWSATRYN          | GGTAGGAAAAATAT        |
| M0013 |            | 0.83107 |      |     |                         |                       |
| 6     | V\$OCT1_02 | 7       | 2781 | (+) | NNGAATATKCANNNN         | AAAAATATTTAATAA       |
| M0016 |            | 0.83437 |      |     |                         |                       |
| 2     | V\$OCT1_06 | 5       | 2783 | (+) | CWNAWTKWSATRYN          | AAATATTTAATAAT        |
| M0016 |            | 0.94531 |      |     |                         |                       |
| 2     | V\$OCT1_06 | 2       | 2784 | (-) | CWNAWTKWSATRYN          | AATATTTAATAATG        |
| M0013 |            | 0.84670 |      |     |                         |                       |
| 7     | V\$OCT1_03 | 1       | 2786 | (+) | NNNRTAATNANNN           | TATTTAATAATGA         |
| M0013 |            | 0.94389 |      |     |                         |                       |
| 7     | V\$OCT1_03 | 6       | 2789 | (+) | NNNRTAATNANNN           | TTAATAATGAGTT         |
| M0016 |            | 0.82148 |      |     |                         |                       |
| 2     | V\$OCT1_06 | 4       | 2809 | (-) | CWNAWTKWSATRYN          | GGAACGAAAGTTTT        |
| M0013 |            | 0.84946 |      |     |                         |                       |
| 7     | V\$OCT1_03 | 7       | 2831 | (-) | NNNRTAATNANNN           | CTCTCTTTAGCAG         |

|       |            |         |      |     |                        |                         |  |
|-------|------------|---------|------|-----|------------------------|-------------------------|--|
| M0016 |            | 0.81367 |      |     |                        |                         |  |
| 2     | V\$OCT1_06 | 2       | 2846 | (-) | CWNAWTKWSATRYN         | AGAACTCAATGTAG          |  |
| M0013 |            | 0.81200 |      |     |                        | GGTAAGATATTTTTATACAAA-  |  |
| 8     | V\$OCT1_04 | 3       | 2867 | (+) | NNNNNNNWATGCAAATNNNWNW | GA                      |  |
| M0013 |            | 0.74685 |      |     |                        |                         |  |
| 5     | V\$OCT1_01 | 2       | 2870 | (-) | NNNNWTATGCAAATNTNNN    | AAGATATTTTTATACAAAG     |  |
| M0016 |            | 0.87343 |      |     |                        |                         |  |
| 2     | V\$OCT1_06 | 7       | 2872 | (+) | CWNAWTKWSATRYN         | GATATTTTTATACA          |  |
| M0013 |            | 0.86171 |      |     |                        |                         |  |
| 7     | V\$OCT1_03 | 5       | 2873 | (-) | NNNRTAATNANNN          | ATATTTTTATACA           |  |
| M0013 |            | 0.85926 |      |     |                        | ATATTTTTATACAAA-        |  |
| 8     | V\$OCT1_04 | 4       | 2873 | (+) | NNNNNNNWATGCAAATNNNWNW | GAAAAAAA                |  |
| M0013 |            | 0.73349 |      |     |                        |                         |  |
| 5     | V\$OCT1_01 | 9       | 2875 | (+) | NNNNWTATGCAAATNTNNN    | ATTTTTATACAAAGAAAAA     |  |
| M0016 |            | 0.83437 |      |     |                        |                         |  |
| 2     | V\$OCT1_06 | 5       | 2890 | (+) | CWNAWTKWSATRYN         | AAAAAATTAATTTA          |  |
| M0013 |            | 0.78523 |      |     |                        | AAAAATTAATTTAACTG-      |  |
| 8     | V\$OCT1_04 | 6       | 2891 | (+) | NNNNNNNWATGCAAATNNNWNW | TAAAT                   |  |
| M0013 |            | 0.79694 |      |     |                        | AAAATTAATTTAACTGTAAAA-  |  |
| 8     | V\$OCT1_04 | 7       | 2892 | (-) | NNNNNNNWATGCAAATNNNWNW | TA                      |  |
| M0016 |            | 0.82656 |      |     |                        |                         |  |
| 2     | V\$OCT1_06 | 2       | 2892 | (-) | CWNAWTKWSATRYN         | AAAATTAATTTAAC          |  |
| M0016 |            | 0.84726 |      |     |                        |                         |  |
| 2     | V\$OCT1_06 | 6       | 2902 | (-) | CWNAWTKWSATRYN         | TAAGTGTAAAAATAG         |  |
| M0013 |            | 0.74513 |      |     |                        |                         |  |
| 5     | V\$OCT1_01 | 5       | 2927 | (-) | NNNNWTATGCAAATNTNNN    | GATGATTAGCAGAAGACT      |  |
| M0013 |            | 0.84393 |      |     |                        |                         |  |
| 7     | V\$OCT1_03 | 5       | 2947 | (-) | NNNRTAATNANNN          | AGCTAATTGTCAA           |  |
| M0016 |            | 0.86562 |      |     |                        |                         |  |
| 2     | V\$OCT1_06 | 5       | 2949 | (+) | CWNAWTKWSATRYN         | CTAATTGTCAATTT          |  |
| M0019 |            | 0.79448 |      |     |                        |                         |  |
| 5     | V\$OCT1_Q6 | 7       | 2949 | (-) | NNNNATGCAAATNAN        | CTAATTGTCAATTTT         |  |
| M0016 |            | 0.85507 |      |     |                        |                         |  |
| 2     | V\$OCT1_06 | 8       | 2950 | (-) | CWNAWTKWSATRYN         | TAATTGTCAATTTT          |  |
| M0013 |            | 0.80823 |      |     |                        |                         |  |
| 8     | V\$OCT1_04 | 9       | 2951 | (+) | NNNNNNNWATGCAAATNNNWNW | AATTGTCAATTTTTATTTTCCT  |  |
| M0013 |            | 0.78293 |      |     |                        |                         |  |
| 8     | V\$OCT1_04 | 6       | 2952 | (-) | NNNNNNNWATGCAAATNNNWNW | ATTGTCAATTTTTATTTTCCTT  |  |
| M0016 |            | 0.82656 |      |     |                        |                         |  |
| 2     | V\$OCT1_06 | 2       | 2957 | (+) | CWNAWTKWSATRYN         | CAATTTTTATTTT           |  |
| M0013 |            | 0.79464 |      |     |                        |                         |  |
| 8     | V\$OCT1_04 | 7       | 2959 | (-) | NNNNNNNWATGCAAATNNNWNW | ATTTTTATTTTCCTTTATAGAC  |  |
| M0016 |            | 0.81601 |      |     |                        |                         |  |
| 2     | V\$OCT1_06 | 6       | 2988 | (+) | CWNAWTKWSATRYN         | AAGCCTTTCAAGCA          |  |
| M0016 |            | 0.83437 |      |     |                        |                         |  |
| 2     | V\$OCT1_06 | 5       | 2989 | (-) | CWNAWTKWSATRYN         | AGCCTTTCAAGCAG          |  |
| M0013 |            | 0.80508 |      |     |                        |                         |  |
| 6     | V\$OCT1_02 | 9       | 3011 | (+) | NNGAATATKCANNNN        | GATAATGTTCAATCA         |  |
| M0016 |            | 0.83945 |      |     |                        |                         |  |
| 2     | V\$OCT1_06 | 3       | 3012 | (+) | CWNAWTKWSATRYN         | ATAATGTTCAATCA          |  |
| M0024 |            | 0.81704 |      |     |                        |                         |  |
| 8     | V\$OCT1_07 | 5       | 3012 | (+) | TNTATGNTAATT           | ATAATGTTCAAT            |  |
| M0013 |            |         |      |     |                        | TAATGTTCAATCAGAGGCAATT  |  |
| 8     | V\$OCT1_04 | 0.7821  | 3013 | (+) | NNNNNNNWATGCAAATNNNWNW | T                       |  |
| M0016 |            | 0.80039 |      |     |                        |                         |  |
| 2     | V\$OCT1_06 | 1       | 3031 | (-) | CWNAWTKWSATRYN         | AATTTCCAGATTT           |  |
| M0016 |            | 0.80078 |      |     |                        |                         |  |
| 2     | V\$OCT1_06 | 1       | 3055 | (+) | CWNAWTKWSATRYN         | AACACTGTATTATC          |  |
| M0016 |            | 0.84453 |      |     |                        |                         |  |
| 2     | V\$OCT1_06 | 1       | 3068 | (+) | CWNAWTKWSATRYN         | CTTTTTGTGTTACA          |  |
| M0016 |            | 0.83945 |      |     |                        |                         |  |
| 2     | V\$OCT1_06 | 3       | 3073 | (-) | CWNAWTKWSATRYN         | TGTGTTACATTAAT          |  |
| M0013 |            | 0.80614 |      |     |                        |                         |  |
| 8     | V\$OCT1_04 | 8       | 3192 | (-) | NNNNNNNWATGCAAATNNNWNW | ACTTTCACTTTTCACTTTCATGC |  |
| M0016 |            | 0.86835 |      |     |                        |                         |  |
| 2     | V\$OCT1_06 | 9       | 3202 | (+) | CWNAWTKWSATRYN         | TTCACTTTCATGCA          |  |



|       |            |         |      |     |                        |                          |
|-------|------------|---------|------|-----|------------------------|--------------------------|
| M0016 |            | 0.85703 |      |     |                        |                          |
| 2     | V\$OCT1_06 | 1       | 3258 | (-) | CWNAWTKWSATRYN         | AGAATCCCAGGGAC           |
| M0016 |            | 0.80078 |      |     |                        |                          |
| 2     | V\$OCT1_06 | 1       | 3301 | (-) | CWNAWTKWSATRYN         | GGTCTTACAGTGTT           |
| M0016 |            | 0.83476 |      |     |                        |                          |
| 2     | V\$OCT1_06 | 6       | 3308 | (+) | CWNAWTKWSATRYN         | CAGTGTTGGATACG           |
| M0013 |            | 0.87080 |      |     |                        |                          |
| 7     | V\$OCT1_03 | 2       | 3380 | (+) | NNNRTAATNANNN          | TTGGTAAAGAATA            |
| M0013 |            | 0.84542 |      |     |                        |                          |
| 6     | V\$OCT1_02 | 5       | 3383 | (-) | NNGAATATKCANNNN        | GTAAAGAATATGCCT          |
| M0013 |            | 0.90660 |      |     |                        |                          |
| 6     | V\$OCT1_02 | 5       | 3386 | (+) | NNGAATATKCANNNN        | AAGAATATGCCTGCC          |
| M0016 |            | 0.82929 |      |     |                        |                          |
| 2     | V\$OCT1_06 | 7       | 3392 | (+) | CWNAWTKWSATRYN         | ATGCCTGCCATGCA           |
| M0016 |            | 0.84218 |      |     |                        |                          |
| 2     | V\$OCT1_06 | 7       | 3393 | (-) | CWNAWTKWSATRYN         | TGCCTGCCATGCAG           |
| M0013 |            | 0.83269 |      |     |                        |                          |
| 5     | V\$OCT1_01 | 7       | 3467 | (+) | NNNNWTATGCAAATNTNNN    | TTCTTTAAGCTAATGTGGC      |
| M0024 |            | 0.79923 |      |     |                        |                          |
| 8     | V\$OCT1_07 | 7       | 3470 | (+) | TNTATGNTAATT           | TTTAAGCTAATG             |
| M0013 |            | 0.78105 |      |     |                        |                          |
| 8     | V\$OCT1_04 | 4       | 3511 | (+) | NNNNNNNWATGCAAATNNNWNW | AATTTCCACTGTATATATTTTAA  |
| M0024 |            | 0.80072 |      |     |                        |                          |
| 8     | V\$OCT1_07 | 1       | 3511 | (-) | TNTATGNTAATT           | AATTTCCACTGT             |
| M0013 |            | 0.81179 |      |     |                        |                          |
| 8     | V\$OCT1_04 | 4       | 3547 | (-) | NNNNNNNWATGCAAATNNNWNW | TAGAAGGTTTAACATTCTAG-TAA |
| M0016 |            | 0.80859 |      |     |                        |                          |
| 2     | V\$OCT1_06 | 4       | 3551 | (+) | CWNAWTKWSATRYN         | AGGTTTAACATTCT           |
| M0016 |            | 0.82695 |      |     |                        |                          |
| 2     | V\$OCT1_06 | 3       | 3557 | (-) | CWNAWTKWSATRYN         | AACATTCTAGTAAT           |
| M0013 |            | 0.85025 |      |     |                        |                          |
| 7     | V\$OCT1_03 | 7       | 3563 | (+) | NNNRTAATNANNN          | CTAGTAATTTCTA            |
| M0013 |            |         |      |     |                        |                          |
| 8     | V\$OCT1_04 | 0.80803 | 3581 | (+) | NNNNNNNWATGCAAATNNNWNW | GTTTGTTATTGGAAATTGTATCA  |
| M0024 |            | 0.81513 |      |     |                        |                          |
| 8     | V\$OCT1_07 | 7       | 3586 | (+) | TNTATGNTAATT           | TTATTGGAAATT             |
| M0016 |            | 0.80585 |      |     |                        |                          |
| 2     | V\$OCT1_06 | 9       | 3597 | (-) | CWNAWTKWSATRYN         | TGTATCACTGTGCC           |
| M0016 |            |         |      |     |                        |                          |
| 2     | V\$OCT1_06 | 0.88125 | 3623 | (+) | CWNAWTKWSATRYN         | CTTAATGAACTGTA           |
| M0016 |            | 0.80078 |      |     |                        |                          |
| 2     | V\$OCT1_06 | 1       | 3649 | (+) | CWNAWTKWSATRYN         | CTGTCTTAAACTCT           |
| M0013 |            | 0.84235 |      |     |                        |                          |
| 7     | V\$OCT1_03 | 5       | 3663 | (-) | NNNRTAATNANNN          | CTCTGTTTACCTT            |
| M0016 |            | 0.80859 |      |     |                        |                          |
| 2     | V\$OCT1_06 | 4       | 3682 | (+) | CWNAWTKWSATRYN         | TGCTTTGGCATTTA           |
| M0016 |            | 0.82148 |      |     |                        |                          |
| 2     | V\$OCT1_06 | 4       | 3757 | (+) | CWNAWTKWSATRYN         | CACTTTGTAAAGTG           |
| M0013 |            | 0.80531 |      |     |                        |                          |
| 8     | V\$OCT1_04 | 2       | 3772 | (+) | NNNNNNNWATGCAAATNNNWNW | GGGCAGA-CATGCAAATGGACATA |
| M0013 |            | 0.81247 |      |     |                        |                          |
| 5     | V\$OCT1_01 | 6       | 3774 | (+) | NNNNWTATGCAAATNTNNN    | GCAGACATGCAAATGGACA      |
| M0019 |            | 0.86217 |      |     |                        |                          |
| 5     | V\$OCT1_Q6 | 2       | 3776 | (+) | NNNNATGCAAATNAN        | AGACATGCAAATGGA          |
| M0013 |            | 0.74074 |      |     |                        |                          |
| 5     | V\$OCT1_01 | 8       | 3781 | (-) | NNNNWTATGCAAATNTNNN    | TGCAAATGGACATATTTTA      |
| M0016 |            | 0.89414 |      |     |                        |                          |
| 2     | V\$OCT1_06 | 1       | 3783 | (+) | CWNAWTKWSATRYN         | CAAATGGACATATT           |
| M0016 |            | 0.86562 |      |     |                        |                          |
| 2     | V\$OCT1_06 | 5       | 3791 | (+) | CWNAWTKWSATRYN         | CATATTTTATTATT           |
| M0016 |            | 0.85546 |      |     |                        |                          |
| 2     | V\$OCT1_06 | 9       | 3791 | (-) | CWNAWTKWSATRYN         | CATATTTTATTATT           |
| M0013 |            | 0.88700 |      |     |                        |                          |
| 7     | V\$OCT1_03 | 1       | 3794 | (-) | NNNRTAATNANNN          | ATTTTATTATTAT            |
| M0013 |            | 0.91149 |      |     |                        |                          |
| 7     | V\$OCT1_03 | 7       | 3797 | (-) | NNNRTAATNANNN          | TTATTATTATACC            |

|       |            |         |      |     |                         |                         |
|-------|------------|---------|------|-----|-------------------------|-------------------------|
| M0013 |            | 0.85855 |      |     |                         |                         |
| 7     | V\$OCT1_03 | 4       | 3816 | (+) | NNNRTAATNANNN           | CTAGTAAATAAGA           |
| M0013 |            | 0.78911 |      |     |                         |                         |
| 6     | V\$OCT1_02 | 7       | 3931 | (-) | NNGAATATKCANNNN         | TGCATCAATATACTT         |
| M0016 |            | 0.83945 |      |     |                         |                         |
| 2     | V\$OCT1_06 | 3       | 3931 | (-) | CWNAWKWSATRYN           | TGCATCAATATACT          |
| M0016 |            | 0.86992 |      |     |                         |                         |
| 2     | V\$OCT1_06 | 2       | 4057 | (+) | CWNAWKWSATRYN           | ATTCCTGGGATTCT          |
| M0016 |            | 0.86835 |      |     |                         |                         |
| 2     | V\$OCT1_06 | 9       | 4113 | (-) | CWNAWKWSATRYN           | TGCATGAAAGTGAA          |
| M0013 |            | 0.78398 |      |     |                         | GCATGAAAGTGAAAAGGGAAA   |
| 8     | V\$OCT1_04 | 2       | 4114 | (+) | NNNNNNNNWATGCAAATNNNWNW | GT                      |
| M0016 |            | 0.80859 |      |     |                         |                         |
| 2     | V\$OCT1_06 | 4       | 4142 | (+) | CWNAWKWSATRYN           | CGCTCAGTCATGTC          |
| M0016 |            | 0.87773 |      |     |                         |                         |
| 2     | V\$OCT1_06 | 4       | 4200 | (+) | CWNAWKWSATRYN           | GTCCATGGGATTTT          |
| M0013 |            | 0.79263 |      |     |                         |                         |
| 6     | V\$OCT1_02 | 7       | 4268 | (+) | NNGAATATKCANNNN         | GAGAGTATGTATTTTC        |
| M0016 |            | 0.86289 |      |     |                         |                         |
| 2     | V\$OCT1_06 | 1       | 4271 | (-) | CWNAWKWSATRYN           | AGTATGTATTTCTT          |
| M0016 |            | 0.82109 |      |     |                         |                         |
| 2     | V\$OCT1_06 | 4       | 4274 | (+) | CWNAWKWSATRYN           | ATGTATTTCTTATA          |
| M0013 |            | 0.77016 |      |     |                         |                         |
| 6     | V\$OCT1_02 | 8       | 4282 | (+) | NNGAATATKCANNNN         | CTTATAATTCATTAG         |
| M0013 |            | 0.88660 |      |     |                         |                         |
| 7     | V\$OCT1_03 | 6       | 4287 | (-) | NNNRTAATNANNN           | AATTCATTAGAAG           |
| M0016 |            | 0.82890 |      |     |                         |                         |
| 2     | V\$OCT1_06 | 6       | 4288 | (+) | CWNAWKWSATRYN           | ATTCATTAGAAGCC          |
| M0013 |            | 0.84156 |      |     |                         |                         |
| 7     | V\$OCT1_03 | 5       | 4298 | (+) | NNNRTAATNANNN           | AGCCTAAACATAA           |
| M0013 |            | 0.77179 |      |     |                         |                         |
| 6     | V\$OCT1_02 | 2       | 4322 | (-) | NNGAATATKCANNNN         | AGAATGATTATTGCA         |
| M0013 |            | 0.85894 |      |     |                         |                         |
| 7     | V\$OCT1_03 | 9       | 4323 | (-) | NNNRTAATNANNN           | GAATGATTATTGC           |
| M0016 |            | 0.81210 |      |     |                         |                         |
| 2     | V\$OCT1_06 | 9       | 4337 | (-) | CWNAWKWSATRYN           | GCCATGAAATTAAA          |
| M0016 |            | 0.88320 |      |     |                         |                         |
| 2     | V\$OCT1_06 | 3       | 4342 | (-) | CWNAWKWSATRYN           | GAAATTAAAAAGACG         |
| M0024 |            | 0.79181 |      |     |                         |                         |
| 8     | V\$OCT1_07 | 7       | 4344 | (-) | TNTATGNTAATT            | AATTAAGACG              |
| M0013 |            | 0.87520 |      |     |                         |                         |
| 6     | V\$OCT1_02 | 3       | 4389 | (-) | NNGAATATKCANNNN         | AGACAGCATATTCAA         |
| M0013 |            |         |      |     |                         | GACAGCATATTCAAAA-       |
| 8     | V\$OCT1_04 | 0.81033 | 4390 | (+) | NNNNNNNNWATGCAAATNNNWNW | GCAGAGA                 |
| M0013 |            | 0.77146 |      |     |                         |                         |
| 5     | V\$OCT1_01 | 1       | 4392 | (+) | NNNNWTATGCAAATNTNNN     | CAGCATATTCAAAAGCAGA     |
| M0013 |            | 0.88467 |      |     |                         |                         |
| 6     | V\$OCT1_02 | 8       | 4392 | (+) | NNGAATATKCANNNN         | CAGCATATTCAAAAG         |
| M0016 |            | 0.80429 |      |     |                         |                         |
| 2     | V\$OCT1_06 | 7       | 4395 | (+) | CWNAWKWSATRYN           | CATATTCAAAAGCA          |
| M0016 |            | 0.80859 |      |     |                         |                         |
| 2     | V\$OCT1_06 | 4       | 4411 | (-) | CWNAWKWSATRYN           | GACATTACTTTGCC          |
| M0016 |            |         |      |     |                         |                         |
| 2     | V\$OCT1_06 | 0.83125 | 4606 | (+) | CWNAWKWSATRYN           | AGCCCTGGGATTTC          |
| M0013 |            | 0.79715 |      |     |                         | AAGGAATGATGCTAAA-       |
| 8     | V\$OCT1_04 | 6       | 4626 | (+) | NNNNNNNNWATGCAAATNNNWNW | GCTGAAA                 |
| M0013 |            |         |      |     |                         |                         |
| 5     | V\$OCT1_01 | 0.7562  | 4628 | (+) | NNNNWTATGCAAATNTNNN     | GGAATGATGCTAAAGCTGA     |
| M0016 |            | 0.92460 |      |     |                         |                         |
| 2     | V\$OCT1_06 | 9       | 4694 | (+) | CWNAWKWSATRYN           | AAGACTTTGATGCT          |
| M0013 |            | 0.85539 |      |     |                         |                         |
| 7     | V\$OCT1_03 | 3       | 4904 | (-) | NNNRTAATNANNN           | GAATGATTAAGAA           |
| M0013 |            | 0.80489 |      |     |                         |                         |
| 8     | V\$OCT1_04 | 3       | 4923 | (+) | NNNNNNNNWATGCAAATNNNWNW | TAGTGGTTATTATTATATATTTT |
| M0013 |            | 0.85302 |      |     |                         |                         |
| 7     | V\$OCT1_03 | 3       | 4926 | (-) | NNNRTAATNANNN           | TGGTTATTATTAT           |

|       |            |         |      |     |                        |                              |
|-------|------------|---------|------|-----|------------------------|------------------------------|
| M0019 |            | 0.79803 |      |     |                        |                              |
| 5     | V\$OCT1_Q6 | 5       | 4928 | (-) | NNNNATGCAAATNAN        | GTTATTATTATATAT              |
| M0013 |            | 0.89648 |      |     |                        |                              |
| 7     | V\$OCT1_03 | 4       | 4929 | (-) | NNNRTAATNANNN          | TTATTATTATATA                |
| M0013 |            | 0.79297 |      |     |                        |                              |
| 8     | V\$OCT1_04 | 4       | 4929 | (+) | NNNNNNNWATGCAAATNNNWNW | TTATTATTATATATTTTCAATGA      |
| M0016 |            | 0.80664 |      |     |                        |                              |
| 2     | V\$OCT1_06 | 1       | 4930 | (+) | CWNAWTKWSATRYN         | TATTATTATATATT               |
| M0013 |            | 0.83270 |      |     |                        |                              |
| 8     | V\$OCT1_04 | 6       | 4935 | (-) | NNNNNNNWATGCAAATNNNWNW | TTATATATTTTCAATGACTATTA      |
| M0013 |            | 0.78607 |      |     |                        |                              |
| 8     | V\$OCT1_04 | 3       | 4940 | (+) | NNNNNNNWATGCAAATNNNWNW | TATTTTCAATGACTATTATTCTT      |
| M0013 |            | 0.80508 |      |     |                        |                              |
| 6     | V\$OCT1_02 | 9       | 4945 | (-) | NNGAATATKCANNNN        | TCAATGACTATTATT              |
| M0013 |            | 0.81348 |      |     |                        |                              |
| 6     | V\$OCT1_02 | 1       | 4951 | (+) | NNGAATATKCANNNN        | ACTATTATTCTTTTA              |
| M0013 |            | 0.77279 |      |     |                        |                              |
| 5     | V\$OCT1_01 | 7       | 4967 | (+) | NNNNWTATGCAAATNTNNN    | AACCAGATGAAAATATTAG          |
| M0016 |            | 0.86835 |      |     |                        |                              |
| 2     | V\$OCT1_06 | 9       | 4970 | (-) | CWNAWTKWSATRYN         | CAGATGAAAATATT               |
| M0016 |            | 0.82890 |      |     |                        |                              |
| 2     | V\$OCT1_06 | 6       | 4977 | (+) | CWNAWTKWSATRYN         | AAATATTAGAGATC               |
| M0016 |            | 0.80820 |      |     |                        |                              |
| 2     | V\$OCT1_06 | 3       | 4987 | (+) | CWNAWTKWSATRYN         | GATCATTTGTTTTTC              |
| M0019 |            | 0.79803 |      |     |                        |                              |
| 5     | V\$OCT1_Q6 | 5       | 4988 | (-) | NNNNATGCAAATNAN        | ATCATTTGTTTTCTT              |
| M0013 |            | 0.84828 |      |     |                        |                              |
| 7     | V\$OCT1_03 | 1       | 4998 | (+) | NNNRTAATNANNN          | TTCCTAAGGAGAA                |
| M0013 |            | 0.74742 |      |     |                        |                              |
| 5     | V\$OCT1_01 | 5       | 5027 | (-) | NNNNWTATGCAAATNTNNN    | GACAGGTTTGCATGCAAAG          |
| M0016 |            | 0.87617 |      |     |                        |                              |
| 2     | V\$OCT1_06 | 2       | 5029 | (+) | CWNAWTKWSATRYN         | CAGGTTTGCATGCA               |
| M0013 |            | 0.77890 |      |     |                        |                              |
| 5     | V\$OCT1_01 | 1       | 5032 | (+) | NNNNWTATGCAAATNTNNN    | GTTTGCATGCAAAGTTGTT          |
| M0019 |            | 0.82096 |      |     |                        |                              |
| 5     | V\$OCT1_Q6 | 1       | 5034 | (+) | NNNNATGCAAATNAN        | TTGCATGCAAAGTTG              |
| M0016 |            | 0.94531 |      |     |                        |                              |
| 2     | V\$OCT1_06 | 2       | 5035 | (-) | CWNAWTKWSATRYN         | TGCATGCAAAGTTG               |
| M0024 |            | 0.82404 |      |     |                        |                              |
| 8     | V\$OCT1_07 | 1       | 5035 | (+) | TNTATGNTAATT           | TGCATGCAAAGT                 |
| M0016 |            | 0.81718 |      |     |                        |                              |
| 2     | V\$OCT1_06 | 7       | 5068 | (-) | CWNAWTKWSATRYN         | TGTATGACCCTATG               |
| M0016 |            | 0.81601 |      |     |                        |                              |
| 2     | V\$OCT1_06 | 6       | 5088 | (-) | CWNAWTKWSATRYN         | AACCTGCCAGGTTT               |
| M0016 |            | 0.87773 |      |     |                        |                              |
| 2     | V\$OCT1_06 | 4       | 5106 | (+) | CWNAWTKWSATRYN         | GTCTATGGGATTTT               |
| M0024 |            | 0.80580 |      |     |                        |                              |
| 8     | V\$OCT1_07 | 9       | 5107 | (+) | TNTATGNTAATT           | TCTATGGGATTT                 |
| M0013 |            | 0.76249 |      |     |                        |                              |
| 5     | V\$OCT1_01 | 5       | 5171 | (-) | NNNNWTATGCAAATNTNNN    | ATTGAACTTGCATCTCTTA          |
| M0019 |            | 0.79694 |      |     |                        |                              |
| 5     | V\$OCT1_Q6 | 3       | 5173 | (-) | NNNNATGCAAATNAN        | TGAACTTGCATCTCT              |
| M0016 |            | 0.83203 |      |     |                        |                              |
| 2     | V\$OCT1_06 | 1       | 5235 | (-) | CWNAWTKWSATRYN         | GGAAGCCCAATTAG               |
| M0013 |            | 0.81686 |      |     |                        |                              |
| 5     | V\$OCT1_01 | 4       | 5239 | (-) | NNNNWTATGCAAATNTNNN    | GCCAATTAGCATCTGTTA           |
| M0019 |            | 0.81304 |      |     |                        |                              |
| 5     | V\$OCT1_Q6 | 6       | 5241 | (-) | NNNNATGCAAATNAN        | CCAATTAGCATCTGT              |
| M0024 |            | 0.85520 |      |     |                        |                              |
| 8     | V\$OCT1_07 | 5       | 5243 | (-) | TNTATGNTAATT           | AATTAGCATCTG                 |
| M0013 |            | 0.78830 |      |     |                        |                              |
| 6     | V\$OCT1_02 | 5       | 5293 | (-) | NNGAATATKCANNNN        | TGACTGCATCATCTT              |
| M0013 |            | 0.79945 |      |     |                        |                              |
| 8     | V\$OCT1_04 | 6       | 5323 | (+) | NNNNNNNWATGCAAATNNNWNW | ACAGCCTTATTGAGAATAGTG-<br>GA |
| M0013 |            | 0.80021 |      |     |                        |                              |
| 6     | V\$OCT1_02 | 7       | 5325 | (+) | NNGAATATKCANNNN        | AGCCTTATTGAGAAT              |

|       |            |         |      |     |                         |                        |
|-------|------------|---------|------|-----|-------------------------|------------------------|
| M0013 |            | 0.91189 |      |     |                         |                        |
| 7     | V\$OCT1_03 | 3       | 5364 | (+) | NNNRTAATNANNN           | AAAATAATGATAT          |
| M0013 |            | 0.77422 |      |     |                         |                        |
| 6     | V\$OCT1_02 | 8       | 5387 | (-) | NNGAATATKCANNNN         | GCTGTCCATATTAAC        |
| M0013 |            | 0.78042 |      |     |                         | TGTCCATATTAAC-         |
| 8     | V\$OCT1_04 | 7       | 5389 | (-) | NNNNNNNNWATGCAAATNNNWNW | CTATTAATG              |
| M0013 |            | 0.79435 |      |     |                         |                        |
| 5     | V\$OCT1_01 | 3       | 5391 | (-) | NNNNWTATGCAAATNTNNN     | TCCATATTAACCTATTA      |
| M0016 |            | 0.81718 |      |     |                         |                        |
| 2     | V\$OCT1_06 | 7       | 5393 | (+) | CWNAWTKWSATRYN          | CATATTAACCTATT         |
| M0016 |            | 0.82421 |      |     |                         |                        |
| 2     | V\$OCT1_06 | 9       | 5400 | (+) | CWNAWTKWSATRYN          | ACCTATTAAATGTC         |
| M0016 |            | 0.80078 |      |     |                         |                        |
| 2     | V\$OCT1_06 | 1       | 5401 | (-) | CWNAWTKWSATRYN          | CCTATTAAATGTCT         |
| M0016 |            | 0.85273 |      |     |                         |                        |
| 2     | V\$OCT1_06 | 4       | 5416 | (+) | CWNAWTKWSATRYN          | CATTTTCTGATTTA         |
| M0019 |            | 0.79585 |      |     |                         |                        |
| 5     | V\$OCT1_Q6 | 2       | 5422 | (-) | NNNNATGCAAATNAN         | CTGATTTATGTTGAC        |
| M0013 |            |         |      |     |                         |                        |
| 8     | V\$OCT1_04 | 0.86721 | 5432 | (-) | NNNNNNNNWATGCAAATNNNWNW | TTGACAAATATGAATTTTCTTT |
| M0013 |            | 0.73025 |      |     |                         |                        |
| 5     | V\$OCT1_01 | 6       | 5434 | (-) | NNNNWTATGCAAATNTNNN     | GACAAATATGAATTTTCT     |
| M0013 |            | 0.78830 |      |     |                         |                        |
| 6     | V\$OCT1_02 | 5       | 5435 | (+) | NNGAATATKCANNNN         | ACAAATATGAATTTT        |
| M0016 |            | 0.83984 |      |     |                         |                        |
| 2     | V\$OCT1_06 | 4       | 5436 | (+) | CWNAWTKWSATRYN          | CAAATATGAATTTT         |
| M0016 |            | 0.81601 |      |     |                         |                        |
| 2     | V\$OCT1_06 | 6       | 5437 | (+) | CWNAWTKWSATRYN          | AAATATGAATTTT          |
| M0013 |            | 0.84434 |      |     |                         |                        |
| 6     | V\$OCT1_02 | 2       | 5438 | (-) | NNGAATATKCANNNN         | AATATGAATTTTCT         |
| M0016 |            | 0.86796 |      |     |                         |                        |
| 2     | V\$OCT1_06 | 9       | 5438 | (-) | CWNAWTKWSATRYN          | AATATGAATTTTTC         |
| M0013 |            |         |      |     |                         |                        |
| 8     | V\$OCT1_04 | 0.81033 | 5465 | (+) | NNNNNNNNWATGCAAATNNNWNW | CTGATTTTATTTTATTTTCCA  |
| M0016 |            | 0.83203 |      |     |                         |                        |
| 2     | V\$OCT1_06 | 1       | 5465 | (+) | CWNAWTKWSATRYN          | CTGATTTTATTTT          |
| M0013 |            | 0.84546 |      |     |                         |                        |
| 8     | V\$OCT1_04 | 2       | 5466 | (-) | NNNNNNNNWATGCAAATNNNWNW | TGATTTTATTTTATTTTCCAA  |
| M0019 |            | 0.81550 |      |     |                         |                        |
| 5     | V\$OCT1_Q6 | 2       | 5470 | (-) | NNNNATGCAAATNAN         | TTTATTTTATTTT          |
| M0024 |            | 0.83167 |      |     |                         |                        |
| 8     | V\$OCT1_07 | 3       | 5470 | (+) | TNTATGNTAATT            | TTTATTTTATT            |
| M0013 |            | 0.84235 |      |     |                         |                        |
| 7     | V\$OCT1_03 | 5       | 5492 | (-) | NNNRTAATNANNN           | AATCTATTACACA          |
| M0016 |            | 0.82890 |      |     |                         |                        |
| 2     | V\$OCT1_06 | 6       | 5493 | (+) | CWNAWTKWSATRYN          | ATCTATTACACACA         |
| M0016 |            | 0.80429 |      |     |                         |                        |
| 2     | V\$OCT1_06 | 7       | 5501 | (-) | CWNAWTKWSATRYN          | CACACATCAATAAG         |
| M0013 |            | 0.81242 |      |     |                         | AGGTAAAC-              |
| 8     | V\$OCT1_04 | 2       | 5513 | (-) | NNNNNNNNWATGCAAATNNNWNW | CTTCATATTTAAAC         |
| M0013 |            | 0.78105 |      |     |                         | GGTAAAC-               |
| 8     | V\$OCT1_04 | 4       | 5514 | (+) | NNNNNNNNWATGCAAATNNNWNW | CTTCATATTTAAACG        |
| M0013 |            | 0.73197 |      |     |                         |                        |
| 5     | V\$OCT1_01 | 3       | 5515 | (-) | NNNNWTATGCAAATNTNNN     | GTAAACCTTCATATTTAA     |
| M0016 |            | 0.84726 |      |     |                         |                        |
| 2     | V\$OCT1_06 | 6       | 5517 | (+) | CWNAWTKWSATRYN          | AAAACCTTCATATT         |
| M0013 |            | 0.79171 |      |     |                         |                        |
| 8     | V\$OCT1_04 | 9       | 5521 | (-) | NNNNNNNNWATGCAAATNNNWNW | CCTTCATATTTAAACGTACATT |
| M0016 |            |         |      |     |                         |                        |
| 2     | V\$OCT1_06 | 0.88125 | 5525 | (+) | CWNAWTKWSATRYN          | CATATTTAAACGTA         |
| M0016 |            | 0.84726 |      |     |                         |                        |
| 2     | V\$OCT1_06 | 6       | 5539 | (+) | CWNAWTKWSATRYN          | CATTTTAAAAACT          |
| M0019 |            | 0.80021 |      |     |                         |                        |
| 5     | V\$OCT1_Q6 | 8       | 5559 | (-) | NNNNATGCAAATNAN         | TTGATTTTATAAAC         |
| M0013 |            | 0.84670 |      |     |                         |                        |
| 7     | V\$OCT1_03 | 1       | 5565 | (+) | NNNRTAATNANNN           | TTTATAAACAGCA          |

|       |            |         |      |     |                         |                         |
|-------|------------|---------|------|-----|-------------------------|-------------------------|
| M0016 |            | 0.88906 |      |     |                         |                         |
| 2     | V\$OCT1_06 | 2       | 5574 | (-) | CWNAWTKWSATRYN          | AGCATTTCTTTATG          |
| M0013 |            | 0.87949 |      |     |                         |                         |
| 7     | V\$OCT1_03 | 4       | 5577 | (-) | NNNRTAATNANNN           | ATTTCTTTATGTG           |
| M0016 |            | 0.86796 |      |     |                         |                         |
| 2     | V\$OCT1_06 | 9       | 5609 | (+) | CWNAWTKWSATRYN          | AAAATTGAGAAAGTT         |
| M0016 |            | 0.80859 |      |     |                         |                         |
| 2     | V\$OCT1_06 | 4       | 5617 | (-) | CWNAWTKWSATRYN          | GAAGTTTCAAAGTG          |
| M0016 |            | 0.84492 |      |     |                         |                         |
| 2     | V\$OCT1_06 | 2       | 5619 | (-) | CWNAWTKWSATRYN          | AGTTTCAAAGTGAG          |
| M0013 |            |         |      |     |                         |                         |
| 7     | V\$OCT1_03 | 0.8629  | 5648 | (+) | NNNRTAATNANNN           | GAGGTAATTTGTT           |
| M0013 |            | 0.80928 |      |     |                         | GAAGTATTATGAAACATAACAC  |
| 8     | V\$OCT1_04 | 5       | 5680 | (+) | NNNNNNNNWATGCAAATNNNWNW | A                       |
| M0013 |            |         |      |     |                         |                         |
| 7     | V\$OCT1_03 | 0.88226 | 5699 | (+) | NNNRTAATNANNN           | CACATAAAAAAGAT          |
| M0016 |            | 0.84218 |      |     |                         |                         |
| 2     | V\$OCT1_06 | 7       | 5699 | (-) | CWNAWTKWSATRYN          | CACATAAAAAAGATT         |
| M0016 |            | 0.80429 |      |     |                         |                         |
| 2     | V\$OCT1_06 | 7       | 5701 | (+) | CWNAWTKWSATRYN          | CATAAAAAAGATTTA         |
| M0013 |            | 0.81221 |      |     |                         | ATAAAAAAGATTTATAA-      |
| 8     | V\$OCT1_04 | 2       | 5702 | (+) | NNNNNNNNWATGCAAATNNNWNW | TAATTAT                 |
| M0013 |            |         |      |     |                         | AAAAAGATTTATAA-         |
| 8     | V\$OCT1_04 | 0.82455 | 5704 | (-) | NNNNNNNNWATGCAAATNNNWNW | TAATTATGT               |
| M0013 |            | 0.90517 |      |     |                         |                         |
| 7     | V\$OCT1_03 | 6       | 5711 | (+) | NNNRTAATNANNN           | TTTATAATAATTA           |
| M0024 |            | 0.81980 |      |     |                         |                         |
| 8     | V\$OCT1_07 | 1       | 5711 | (+) | TNTATGNTAATT            | TTTATAATAATT            |
| M0013 |            | 0.91663 |      |     |                         |                         |
| 7     | V\$OCT1_03 | 4       | 5714 | (+) | NNNRTAATNANNN           | ATAATAATTATGT           |
| M0013 |            | 0.89687 |      |     |                         |                         |
| 7     | V\$OCT1_03 | 9       | 5715 | (-) | NNNRTAATNANNN           | TAATAATTATGTT           |
| M0013 |            | 0.79673 |      |     |                         | TAATAATTATGTTTCAGTCTAA- |
| 8     | V\$OCT1_04 | 8       | 5715 | (+) | NNNNNNNNWATGCAAATNNNWNW | GA                      |
| M0013 |            | 0.79652 |      |     |                         | GTCTAAGAATGGTAA-        |
| 8     | V\$OCT1_04 | 9       | 5730 | (+) | NNNNNNNNWATGCAAATNNNWNW | TATAAATG                |
| M0013 |            | 0.79149 |      |     |                         |                         |
| 5     | V\$OCT1_01 | 2       | 5732 | (+) | NNNNWTATGCAAATNTNNN     | CTAAGAATGGTAATATAAA     |
| M0016 |            |         |      |     |                         |                         |
| 2     | V\$OCT1_06 | 0.81875 | 5735 | (+) | CWNAWTKWSATRYN          | AGAATGGTAATATA          |
| M0024 |            | 0.82467 |      |     |                         |                         |
| 8     | V\$OCT1_07 | 7       | 5735 | (+) | TNTATGNTAATT            | AGAATGGTAATA            |
| M0013 |            | 0.78858 |      |     |                         | GAATGGTAA-              |
| 8     | V\$OCT1_04 | 2       | 5736 | (+) | NNNNNNNNWATGCAAATNNNWNW | TATAAATGTCAGTG          |
| M0013 |            | 0.73407 |      |     |                         |                         |
| 5     | V\$OCT1_01 | 1       | 5738 | (+) | NNNNWTATGCAAATNTNNN     | ATGGTAATATAAATGTCAG     |
| M0013 |            |         |      |     |                         |                         |
| 7     | V\$OCT1_03 | 0.84275 | 5738 | (+) | NNNRTAATNANNN           | ATGGTAATATAAA           |
| M0016 |            | 0.83437 |      |     |                         |                         |
| 2     | V\$OCT1_06 | 5       | 5741 | (+) | CWNAWTKWSATRYN          | GTAATATAAATGTC          |
| M0013 |            | 0.78105 |      |     |                         | TAATATAAATGTCAGTGTA-    |
| 8     | V\$OCT1_04 | 4       | 5742 | (+) | NNNNNNNNWATGCAAATNNNWNW | GAA                     |
| M0016 |            | 0.86328 |      |     |                         |                         |
| 2     | V\$OCT1_06 | 1       | 5747 | (-) | CWNAWTKWSATRYN          | TAAATGTCAGTGTA          |
| M0016 |            | 0.84218 |      |     |                         |                         |
| 2     | V\$OCT1_06 | 7       | 5762 | (-) | CWNAWTKWSATRYN          | GAAATGAAAACTTT          |
| M0013 |            | 0.83291 |      |     |                         | TTGACAAAATGAAAA-        |
| 8     | V\$OCT1_04 | 5       | 5774 | (+) | NNNNNNNNWATGCAAATNNNWNW | TATTTTAA                |
| M0013 |            | 0.77909 |      |     |                         |                         |
| 5     | V\$OCT1_01 | 2       | 5776 | (+) | NNNNWTATGCAAATNTNNN     | GACAAAATGAAAATATTTT     |
| M0019 |            | 0.80922 |      |     |                         |                         |
| 5     | V\$OCT1_Q6 | 5       | 5778 | (+) | NNNNATGCAAATNAN         | CAAAATGAAAATATT         |
| M0016 |            |         |      |     |                         |                         |
| 2     | V\$OCT1_06 | 0.9375  | 5779 | (-) | CWNAWTKWSATRYN          | AAAATGAAAATATT          |
| M0024 |            | 0.81238 |      |     |                         |                         |
| 8     | V\$OCT1_07 | 1       | 5781 | (-) | TNTATGNTAATT            | AATGAAAATATT            |

|       |            |         |      |     |                        |                          |
|-------|------------|---------|------|-----|------------------------|--------------------------|
| M0016 |            | 0.82109 |      |     |                        |                          |
| 2     | V\$OCT1_06 | 4       | 5788 | (+) | CWNAWTKWSATRYN         | ATATTTTAAAGGTA           |
| M0016 |            |         |      |     |                        |                          |
| 2     | V\$OCT1_06 | 0.81875 | 5789 | (-) | CWNAWTKWSATRYN         | TATTTTAAAGGTAG           |
| M0016 |            | 0.84726 |      |     |                        |                          |
| 2     | V\$OCT1_06 | 6       | 5801 | (-) | CWNAWTKWSATRYN         | AGAAACACATTTTT           |
| M0016 |            | 0.84726 |      |     |                        |                          |
| 2     | V\$OCT1_06 | 6       | 5808 | (+) | CWNAWTKWSATRYN         | CATTTTAAACACA            |
| M0013 |            | 0.79835 |      |     |                        |                          |
| 5     | V\$OCT1_01 | 9       | 5817 | (+) | NNNNWTATGCAAATNTNNN    | ACACATAATCAAATTTTCAG     |
| M0013 |            |         |      |     |                        |                          |
| 7     | V\$OCT1_03 | 0.92335 | 5818 | (+) | NNNRTAATNANNN          | CACATAATCAAAT            |
| M0016 |            |         |      |     |                        |                          |
| 2     | V\$OCT1_06 | 0.86875 | 5820 | (+) | CWNAWTKWSATRYN         | CATAATCAAATTTTC          |
| M0016 |            | 0.81367 |      |     |                        |                          |
| 2     | V\$OCT1_06 | 2       | 5820 | (-) | CWNAWTKWSATRYN         | CATAATCAAATTTTC          |
| M0016 |            | 0.80351 |      |     |                        |                          |
| 2     | V\$OCT1_06 | 6       | 5826 | (-) | CWNAWTKWSATRYN         | CAAATTTTCAGAGTA          |
| M0013 |            |         |      |     |                        |                          |
| 6     | V\$OCT1_02 | 0.82837 | 5863 | (-) | NNGAATATKCANNNN        | TACTGGTATATTCAT          |
| M0013 |            | 0.82998 |      |     |                        |                          |
| 8     | V\$OCT1_04 | 7       | 5863 | (-) | NNNNNNNWATGCAAATNNNWNW | TACTGGTATATTCATTTTACTAA  |
| M0013 |            |         |      |     |                        |                          |
| 6     | V\$OCT1_02 | 0.87412 | 5866 | (+) | NNGAATATKCANNNN        | TGGTATATTCATTTT          |
| M0016 |            | 0.82656 |      |     |                        |                          |
| 2     | V\$OCT1_06 | 2       | 5867 | (+) | CWNAWTKWSATRYN         | GGTATATTCATTTT           |
| M0013 |            | 0.80112 |      |     |                        |                          |
| 8     | V\$OCT1_04 | 9       | 5869 | (-) | NNNNNNNWATGCAAATNNNWNW | TATATTCATTTTACTAATGGTAT  |
| M0016 |            | 0.82656 |      |     |                        |                          |
| 2     | V\$OCT1_06 | 2       | 5869 | (-) | CWNAWTKWSATRYN         | TATATTCATTTTAC           |
| M0013 |            | 0.85855 |      |     |                        |                          |
| 7     | V\$OCT1_03 | 4       | 5879 | (+) | NNNRTAATNANNN          | TTACTAATGGTAT            |
| M0013 |            | 0.79213 |      |     |                        |                          |
| 8     | V\$OCT1_04 | 7       | 5898 | (-) | NNNNNNNWATGCAAATNNNWNW | TTTAATAAATGCATATTAG-TAG  |
| M0013 |            | 0.87306 |      |     |                        |                          |
| 8     | V\$OCT1_04 | 6       | 5899 | (+) | NNNNNNNWATGCAAATNNNWNW | TTTAATAAATGCATATTAG-TAGG |
| M0013 |            | 0.76745 |      |     |                        |                          |
| 5     | V\$OCT1_01 | 5       | 5900 | (-) | NNNNWTATGCAAATNTNNN    | TTAATAAATGCATATTAGT      |
| M0013 |            | 0.75772 |      |     |                        |                          |
| 5     | V\$OCT1_01 | 6       | 5901 | (+) | NNNNWTATGCAAATNTNNN    | TAATAAATGCATATTAGTA      |
| M0016 |            | 0.85507 |      |     |                        |                          |
| 2     | V\$OCT1_06 | 8       | 5902 | (+) | CWNAWTKWSATRYN         | AATAAATGCATATT           |
| M0019 |            | 0.85616 |      |     |                        |                          |
| 5     | V\$OCT1_Q6 | 8       | 5903 | (+) | NNNNATGCAAATNAN        | ATAAATGCATATTAG          |
| M0013 |            | 0.93584 |      |     |                        |                          |
| 6     | V\$OCT1_02 | 2       | 5904 | (-) | NNGAATATKCANNNN        | TAAATGCATATTAGT          |
| M0016 |            | 0.85273 |      |     |                        |                          |
| 2     | V\$OCT1_06 | 4       | 5904 | (-) | CWNAWTKWSATRYN         | TAAATGCATATTAG           |
| M0024 |            | 0.81916 |      |     |                        |                          |
| 8     | V\$OCT1_07 | 5       | 5904 | (+) | TNTATGNTAATT           | TAAATGCATATT             |
| M0016 |            | 0.81406 |      |     |                        |                          |
| 2     | V\$OCT1_06 | 2       | 5937 | (+) | CWNAWTKWSATRYN         | GGGACTGTGATCCC           |
| M0013 |            | 0.78786 |      |     |                        |                          |
| 5     | V\$OCT1_01 | 7       | 5948 | (+) | NNNNWTATGCAAATNTNNN    | CCCCTTATTCTAATGATGG      |
| M0016 |            | 0.85721 |      |     |                        |                          |
| 1     | V\$OCT1_05 | 4       | 5951 | (-) | MKNATTTGCATAYY         | CTTATTCTAATGAT           |
| M0016 |            | 0.80195 |      |     |                        |                          |
| 2     | V\$OCT1_06 | 3       | 5951 | (+) | CWNAWTKWSATRYN         | CTTATTCTAATGAT           |
| M0024 |            | 0.79372 |      |     |                        |                          |
| 8     | V\$OCT1_07 | 5       | 5951 | (+) | TNTATGNTAATT           | CTTATTCTAATG             |
| M0013 |            | 0.87791 |      |     |                        |                          |
| 7     | V\$OCT1_03 | 4       | 5954 | (+) | NNNRTAATNANNN          | ATTCTAATGATGG            |
| M0013 |            | 0.79967 |      |     |                        |                          |
| 6     | V\$OCT1_02 | 5       | 5960 | (-) | NNGAATATKCANNNN        | ATGATGGATATACTG          |
| M0013 |            | 0.91472 |      |     |                        |                          |
| 6     | V\$OCT1_02 | 7       | 6082 | (-) | NNGAATATKCANNNN        | ATTGAGAATATTCAT          |

|       |            |         |      |     |                        |  |                        |
|-------|------------|---------|------|-----|------------------------|--|------------------------|
| M0013 |            | 0.83333 |      |     |                        |  | ATTGAGAA-              |
| 8     | V\$OCT1_04 | 3       | 6082 | (-) | NNNNNNNWATGCAAATNNNWNW |  | TATTCATAATTACCC        |
| M0013 |            | 0.85633 |      |     |                        |  | TTGAGAA-               |
| 8     | V\$OCT1_04 | 6       | 6083 | (+) | NNNNNNNWATGCAAATNNNWNW |  | TATTCATAATTACCCA       |
| M0013 |            | 0.76001 |      |     |                        |  |                        |
| 5     | V\$OCT1_01 | 5       | 6084 | (-) | NNNNWTATGCAAATNTNNN    |  | TGAGAATATTCATAATTAC    |
| M0013 |            | 0.96128 |      |     |                        |  |                        |
| 6     | V\$OCT1_02 | 9       | 6085 | (+) | NNGAATATKCANNNN        |  | GAGAATATTCATAAT        |
| M0016 |            | 0.87049 |      |     |                        |  |                        |
| 1     | V\$OCT1_05 | 6       | 6086 | (+) | MKNATTTGCATAYY         |  | AGAATATTCATAAT         |
| M0013 |            | 0.86724 |      |     |                        |  |                        |
| 7     | V\$OCT1_03 | 6       | 6092 | (+) | NNNRTAATNANNN          |  | TTCATAATTACCC          |
| M0013 |            | 0.93678 |      |     |                        |  |                        |
| 7     | V\$OCT1_03 | 4       | 6093 | (-) | NNNRTAATNANNN          |  | TCATAATTACCCA          |
| M0013 |            | 0.80644 |      |     |                        |  |                        |
| 6     | V\$OCT1_02 | 3       | 6124 | (-) | NNGAATATKCANNNN        |  | ACAGTGACTATTCAA        |
| M0013 |            | 0.86220 |      |     |                        |  |                        |
| 6     | V\$OCT1_02 | 9       | 6127 | (+) | NNGAATATKCANNNN        |  | GTGACTATTCAATGG        |
| M0016 |            | 0.80859 |      |     |                        |  |                        |
| 2     | V\$OCT1_06 | 4       | 6130 | (-) | CWNAWTKWSATRYN         |  | ACTATTCAATGGTT         |
| M0013 |            | 0.80740 |      |     |                        |  |                        |
| 8     | V\$OCT1_04 | 3       | 6135 | (-) | NNNNNNNWATGCAAATNNNWNW |  | TCAATGGTTTTATATTATATTG |
| M0016 |            | 0.80859 |      |     |                        |  |                        |
| 2     | V\$OCT1_06 | 4       | 6150 | (-) | CWNAWTKWSATRYN         |  | TATATTTGATAGCT         |
| M0013 |            | 0.84156 |      |     |                        |  |                        |
| 7     | V\$OCT1_03 | 5       | 6171 | (-) | NNNRTAATNANNN          |  | TCACATTTATGAA          |
| M0013 |            | 0.78272 |      |     |                        |  | TCACATTTATGAATGTGTG-   |
| 8     | V\$OCT1_04 | 7       | 6171 | (+) | NNNNNNNWATGCAAATNNNWNW |  | GAGT                   |
| M0016 |            | 0.82929 |      |     |                        |  |                        |
| 2     | V\$OCT1_06 | 7       | 6172 | (-) | CWNAWTKWSATRYN         |  | CACATTTATGAATG         |
| M0016 |            | 0.82148 |      |     |                        |  |                        |
| 2     | V\$OCT1_06 | 4       | 6174 | (+) | CWNAWTKWSATRYN         |  | CATTTATGAATGTG         |
| M0013 |            | 0.82747 |      |     |                        |  | AAAAAGTATTTCCATTACCCAG |
| 8     | V\$OCT1_04 | 8       | 6197 | (-) | NNNNNNNWATGCAAATNNNWNW |  | A                      |
| M0013 |            | 0.77203 |      |     |                        |  |                        |
| 5     | V\$OCT1_01 | 4       | 6199 | (-) | NNNNWTATGCAAATNTNNN    |  | AAAGTATTTCCATTACCCA    |
| M0016 |            | 0.83945 |      |     |                        |  |                        |
| 2     | V\$OCT1_06 | 3       | 6201 | (-) | CWNAWTKWSATRYN         |  | AGTATTTCCATTAC         |
| M0019 |            | 0.81495 |      |     |                        |  |                        |
| 5     | V\$OCT1_Q6 | 6       | 6201 | (-) | NNNNATGCAAATNAN        |  | AGTATTTCCATTACC        |
| M0013 |            | 0.88186 |      |     |                        |  |                        |
| 7     | V\$OCT1_03 | 5       | 6205 | (-) | NNNRTAATNANNN          |  | TTTCCATTACCCA          |
| M0016 |            | 0.82148 |      |     |                        |  |                        |
| 2     | V\$OCT1_06 | 4       | 6239 | (+) | CWNAWTKWSATRYN         |  | AACAATTGAGTATA         |
| M0013 |            | 0.77449 |      |     |                        |  |                        |
| 6     | V\$OCT1_02 | 9       | 6241 | (-) | NNGAATATKCANNNN        |  | CAATTGAGTATACAA        |
| M0013 |            | 0.78565 |      |     |                        |  | AATTGAGTATA-           |
| 8     | V\$OCT1_04 | 5       | 6242 | (+) | NNNNNNNWATGCAAATNNNWNW |  | CAAATGTGTGAC           |
| M0013 |            | 0.86169 |      |     |                        |  |                        |
| 5     | V\$OCT1_01 | 4       | 6244 | (+) | NNNNWTATGCAAATNTNNN    |  | TTGAGTATACAAATGTGTG    |
| M0019 |            | 0.83433 |      |     |                        |  |                        |
| 5     | V\$OCT1_Q6 | 4       | 6246 | (+) | NNNNATGCAAATNAN        |  | GAGTATACAAATGTG        |
| M0016 |            | 0.87382 |      |     |                        |  |                        |
| 2     | V\$OCT1_06 | 8       | 6247 | (-) | CWNAWTKWSATRYN         |  | AGTATACAAATGTG         |
| M0016 |            | 0.80820 |      |     |                        |  |                        |
| 2     | V\$OCT1_06 | 3       | 6265 | (-) | CWNAWTKWSATRYN         |  | CATACCACATAGTT         |
| M0013 |            | 0.85618 |      |     |                        |  |                        |
| 7     | V\$OCT1_03 | 3       | 6271 | (-) | NNNRTAATNANNN          |  | ACATAGTTATTAA          |
| M0013 |            |         |      |     |                        |  |                        |
| 5     | V\$OCT1_01 | 0.77852 | 6278 | (-) | NNNNWTATGCAAATNTNNN    |  | TATTAATTAGCAGAACTG     |
| M0013 |            | 0.86487 |      |     |                        |  |                        |
| 7     | V\$OCT1_03 | 6       | 6278 | (-) | NNNRTAATNANNN          |  | TATTAATTAGCAG          |
| M0024 |            | 0.86410 |      |     |                        |  |                        |
| 8     | V\$OCT1_07 | 9       | 6282 | (-) | TNTATGNTAATT           |  | AATTAGCAGAAC           |
| M0013 |            | 0.75829 |      |     |                        |  |                        |
| 5     | V\$OCT1_01 | 8       | 6287 | (-) | NNNNWTATGCAAATNTNNN    |  | GCAGAACTTGCTTAAAAAT    |

|       |            |         |      |     |                         |                               |
|-------|------------|---------|------|-----|-------------------------|-------------------------------|
| M0016 |            | 0.80937 |      |     |                         |                               |
| 2     | V\$OCT1_06 | 5       | 6295 | (-) | CWNAWTKWSATRYN          | TGCTTAAAAATAAG                |
| M0016 |            | 0.84257 |      |     |                         |                               |
| 2     | V\$OCT1_06 | 8       | 6319 | (+) | CWNAWTKWSATRYN          | CAGCATAAAAATTCT               |
| M0016 |            | 0.87617 |      |     |                         |                               |
| 2     | V\$OCT1_06 | 2       | 6320 | (-) | CWNAWTKWSATRYN          | AGCATAAAAATTCTT               |
| M0013 |            | 0.78451 |      |     |                         |                               |
| 6     | V\$OCT1_02 | 5       | 6322 | (+) | NNGAATATKCANNNN         | CATAAAATTCTTTCA               |
| M0013 |            | 0.78084 |      |     |                         |                               |
| 8     | V\$OCT1_04 | 5       | 6323 | (-) | NNNNNNNNWATGCAAATNNNWNW | ATAAAATTCTTTCATTATATTAC       |
| M0016 |            | 0.82148 |      |     |                         |                               |
| 2     | V\$OCT1_06 | 4       | 6327 | (+) | CWNAWTKWSATRYN          | AATTCTTTCATTAT                |
| M0013 |            | 0.86724 |      |     |                         |                               |
| 7     | V\$OCT1_03 | 6       | 6331 | (-) | NNNRTAATNANNN           | CTTTCATTATATT                 |
| M0013 |            |         |      |     |                         |                               |
| 6     | V\$OCT1_02 | 0.77098 | 6351 | (-) | NNGAATATKCANNNN         | TGGTAACATATTTAT               |
| M0013 |            | 0.78314 |      |     |                         |                               |
| 8     | V\$OCT1_04 | 5       | 6351 | (-) | NNNNNNNNWATGCAAATNNNWNW | TGGTAACATATTTATCTAATTGT       |
| M0013 |            |         |      |     |                         |                               |
| 7     | V\$OCT1_03 | 0.86448 | 6356 | (-) | NNNRTAATNANNN           | ACATATTTATCTA                 |
| M0016 |            | 0.89453 |      |     |                         |                               |
| 2     | V\$OCT1_06 | 1       | 6361 | (-) | CWNAWTKWSATRYN          | TTTATCTAATTGTG                |
| M0013 |            |         |      |     |                         |                               |
| 7     | V\$OCT1_03 | 0.88305 | 6364 | (-) | NNNRTAATNANNN           | ATCTAATTGTGAT                 |
| M0016 |            | 0.96093 |      |     |                         |                               |
| 2     | V\$OCT1_06 | 7       | 6366 | (+) | CWNAWTKWSATRYN          | CTAATTGTGATATT                |
| M0016 |            | 0.82929 |      |     |                         |                               |
| 2     | V\$OCT1_06 | 7       | 6374 | (-) | CWNAWTKWSATRYN          | GATATTTAAGCTTT                |
| M0016 |            | 0.81367 |      |     |                         |                               |
| 2     | V\$OCT1_06 | 2       | 6389 | (+) | CWNAWTKWSATRYN          | CTGTTTTAGAATTG                |
| M0016 |            | 0.83476 |      |     |                         |                               |
| 2     | V\$OCT1_06 | 6       | 6396 | (-) | CWNAWTKWSATRYN          | AGAATTGAAGATTG                |
| M0013 |            | 0.80481 |      |     |                         |                               |
| 6     | V\$OCT1_02 | 9       | 6397 | (-) | NNGAATATKCANNNN         | GAATTGAAGATTGAT               |
| M0013 |            | 0.78586 |      |     |                         |                               |
| 8     | V\$OCT1_04 | 4       | 6433 | (+) | NNNNNNNNWATGCAAATNNNWNW | ATTTTCTAAGTCAAAATGAATTT       |
| M0013 |            | 0.81023 |      |     |                         |                               |
| 6     | V\$OCT1_02 | 3       | 6445 | (-) | NNGAATATKCANNNN         | AAAATGAATTTACAA               |
| M0016 |            | 0.80820 |      |     |                         |                               |
| 2     | V\$OCT1_06 | 3       | 6465 | (-) | CWNAWTKWSATRYN          | TGCCTTTAAAGACT                |
| M0013 |            | 0.89569 |      |     |                         |                               |
| 7     | V\$OCT1_03 | 3       | 6478 | (-) | NNNRTAATNANNN           | TCAAGATTACCAC                 |
| M0016 |            | 0.88281 |      |     |                         |                               |
| 2     | V\$OCT1_06 | 2       | 6542 | (-) | CWNAWTKWSATRYN          | TGAATTAAAAAAAC                |
| M0024 |            | 0.79860 |      |     |                         |                               |
| 8     | V\$OCT1_07 | 1       | 6544 | (-) | TNTATGNTAATT            | AATTAAAAAAAC                  |
| M0013 |            | 0.80782 |      |     |                         |                               |
| 8     | V\$OCT1_04 | 1       | 6546 | (+) | NNNNNNNNWATGCAAATNNNWNW | TTAAAAAAACACATATTAA-<br>GACT  |
| M0013 |            | 0.79074 |      |     |                         |                               |
| 6     | V\$OCT1_02 | 2       | 6551 | (-) | NNGAATATKCANNNN         | AAAACACATATTAAG               |
| M0016 |            | 0.80859 |      |     |                         |                               |
| 2     | V\$OCT1_06 | 4       | 6563 | (+) | CWNAWTKWSATRYN          | AAGACTTAGTTTCC                |
| M0013 |            | 0.79924 |      |     |                         |                               |
| 8     | V\$OCT1_04 | 7       | 6564 | (-) | NNNNNNNNWATGCAAATNNNWNW | AGACTTAG-<br>TTTCCATTAAAAACAA |
| M0024 |            | 0.81513 |      |     |                         |                               |
| 8     | V\$OCT1_07 | 7       | 6570 | (-) | TNTATGNTAATT            | AGTTTCCATTAA                  |
| M0013 |            | 0.78607 |      |     |                         |                               |
| 8     | V\$OCT1_04 | 3       | 6615 | (-) | NNNNNNNNWATGCAAATNNNWNW | AAGTCTTTTTTAAAATAGATCTTT      |
| M0016 |            | 0.83164 |      |     |                         |                               |
| 2     | V\$OCT1_06 | 1       | 6634 | (+) | CWNAWTKWSATRYN          | CTTCTTTGTTATA                 |
| M0016 |            | 0.81367 |      |     |                         |                               |
| 2     | V\$OCT1_06 | 2       | 6654 | (+) | CWNAWTKWSATRYN          | CAGTTTGGACTATT                |
| M0013 |            | 0.75047 |      |     |                         |                               |
| 5     | V\$OCT1_01 | 7       | 6662 | (+) | NNNNWTATGCAAATNTNNN     | ACTATTATCCAAAGTATGT           |
| M0013 |            | 0.77531 |      |     |                         |                               |
| 6     | V\$OCT1_02 | 1       | 6662 | (+) | NNGAATATKCANNNN         | ACTATTATCCAAAGT               |



|       |            |         |      |     |                         |                          |
|-------|------------|---------|------|-----|-------------------------|--------------------------|
| M0016 |            | 0.87215 |      |     |                         |                          |
| 1     | V\$OCT1_05 | 7       | 6665 | (-) | MKNATTTGCATAYY          | ATTATCCAAAGTAT           |
| M0016 |            |         |      |     |                         |                          |
| 2     | V\$OCT1_06 | 0.81875 | 6665 | (-) | CWNAWTKWSATRYN          | ATTATCCAAAGTAT           |
| M0016 |            | 0.83437 |      |     |                         |                          |
| 2     | V\$OCT1_06 | 5       | 6696 | (-) | CWNAWTKWSATRYN          | GGCAACTCAGGAAG           |
| M0013 |            | 0.89924 |      |     |                         |                          |
| 7     | V\$OCT1_03 | 9       | 6782 | (+) | NNNRTAATNANNN           | GGGTTAATGAGAA            |
| M0016 |            | 0.84726 |      |     |                         |                          |
| 2     | V\$OCT1_06 | 6       | 6784 | (+) | CWNAWTKWSATRYN          | GTTAATGAGAAATC           |
| M0013 |            | 0.79209 |      |     |                         |                          |
| 6     | V\$OCT1_02 | 5       | 6802 | (-) | NNGAATATKCANNNN         | AGCGAGCATTTTACT          |
| M0013 |            | 0.88186 |      |     |                         |                          |
| 7     | V\$OCT1_03 | 5       | 6813 | (-) | NNNRTAATNANNN           | TACTCATTAGTCT            |
| M0013 |            | 0.79004 |      |     |                         |                          |
| 8     | V\$OCT1_04 | 6       | 6816 | (+) | NNNNNNNNWATGCAAATNNNWNW | TCATTAGTCTTCATATGACCCCA  |
| M0016 |            | 0.81640 |      |     |                         |                          |
| 2     | V\$OCT1_06 | 6       | 6858 | (-) | CWNAWTKWSATRYN          | CAAATGGAAGATTT           |
| M0016 |            | 0.83437 |      |     |                         |                          |
| 2     | V\$OCT1_06 | 5       | 6865 | (+) | CWNAWTKWSATRYN          | AAGATTTTCTTTCT           |
| M0013 |            | 0.77152 |      |     |                         |                          |
| 6     | V\$OCT1_02 | 1       | 6881 | (-) | NNGAATATKCANNNN         | TCACTGAATTATGTT          |
| M0016 |            |         |      |     |                         |                          |
| 2     | V\$OCT1_06 | 0.81875 | 6892 | (-) | CWNAWTKWSATRYN          | TGTTTTAAAAAGAG           |
| M0013 |            | 0.78105 |      |     |                         |                          |
| 8     | V\$OCT1_04 | 4       | 6905 | (+) | NNNNNNNNWATGCAAATNNNWNW | GGAGGATAATTCATCATAAA-TAA |
| M0013 |            | 0.82539 |      |     |                         |                          |
| 6     | V\$OCT1_02 | 3       | 6907 | (+) | NNGAATATKCANNNN         | AGGATAATTCATCAT          |
| M0013 |            | 0.80154 |      |     |                         |                          |
| 8     | V\$OCT1_04 | 7       | 6907 | (-) | NNNNNNNNWATGCAAATNNNWNW | AGGATAATTCATCATAAA-TAACA |
| M0016 |            | 0.85273 |      |     |                         |                          |
| 2     | V\$OCT1_06 | 4       | 6921 | (-) | CWNAWTKWSATRYN          | TAAATAACAATTAT           |
| M0013 |            | 0.85736 |      |     |                         |                          |
| 7     | V\$OCT1_03 | 9       | 6925 | (-) | NNNRTAATNANNN           | TAACAATTATAAC            |
| M0016 |            | 0.81367 |      |     |                         |                          |
| 2     | V\$OCT1_06 | 2       | 6946 | (-) | CWNAWTKWSATRYN          | GGACTCAAAGTTTT           |
| M0016 |            | 0.83476 |      |     |                         |                          |
| 2     | V\$OCT1_06 | 6       | 7115 | (+) | CWNAWTKWSATRYN          | CAGCCTGAAATAAT           |
| M0016 |            | 0.87578 |      |     |                         |                          |
| 2     | V\$OCT1_06 | 1       | 7116 | (-) | CWNAWTKWSATRYN          | AGCCTGAAATAATG           |
| M0013 |            | 0.85381 |      |     |                         |                          |
| 7     | V\$OCT1_03 | 3       | 7121 | (+) | NNNRTAATNANNN           | GAAATAATGGGAG            |
| M0016 |            | 0.82148 |      |     |                         |                          |
| 2     | V\$OCT1_06 | 4       | 7123 | (+) | CWNAWTKWSATRYN          | AATAATGGGAGTCC           |
| M0016 |            | 0.86328 |      |     |                         |                          |
| 2     | V\$OCT1_06 | 1       | 7166 | (+) | CWNAWTKWSATRYN          | CACAAGGAAATGCC           |
| M0013 |            | 0.77314 |      |     |                         |                          |
| 6     | V\$OCT1_02 | 6       | 7169 | (+) | NNGAATATKCANNNN         | AAGGAAATGCCCTTC          |
| M0016 |            | 0.81367 |      |     |                         |                          |
| 2     | V\$OCT1_06 | 2       | 7180 | (+) | CWNAWTKWSATRYN          | CTTCCCTAAATATC           |
| M0013 |            | 0.78695 |      |     |                         |                          |
| 6     | V\$OCT1_02 | 2       | 7182 | (-) | NNGAATATKCANNNN         | TCCCTAAATATCCAG          |
| M0013 |            | 0.80184 |      |     |                         |                          |
| 6     | V\$OCT1_02 | 1       | 7185 | (+) | NNGAATATKCANNNN         | CTAAATATCCAGTTG          |
| M0016 |            | 0.85273 |      |     |                         |                          |
| 2     | V\$OCT1_06 | 4       | 7188 | (-) | CWNAWTKWSATRYN          | AATATCCAGTTGAG           |
| M0016 |            | 0.91171 |      |     |                         |                          |
| 2     | V\$OCT1_06 | 9       | 7271 | (+) | CWNAWTKWSATRYN          | CAGTCTTGATGCA            |
| M0016 |            | 0.80429 |      |     |                         |                          |
| 2     | V\$OCT1_06 | 7       | 7307 | (+) | CWNAWTKWSATRYN          | CCAACCGTCATGTT           |
| M0013 |            | 0.74265 |      |     |                         |                          |
| 5     | V\$OCT1_01 | 5       | 7391 | (+) | NNNNWTATGCAAATNTNNN     | AGAGATATGCCCATCCAGG      |
| M0013 |            | 0.78749 |      |     |                         |                          |
| 6     | V\$OCT1_02 | 3       | 7391 | (+) | NNGAATATKCANNNN         | AGAGATATGCCCATC          |
| M0016 |            | 0.86562 |      |     |                         |                          |
| 2     | V\$OCT1_06 | 5       | 7484 | (+) | CWNAWTKWSATRYN          | CTAACTGTGCTGTT           |

|       |            |         |      |     |                         |                        |  |
|-------|------------|---------|------|-----|-------------------------|------------------------|--|
| M0024 |            | 0.82361 |      |     |                         |                        |  |
| 8     | V\$OCT1_07 | 7       | 7512 | (+) | TNTATGNTAATT            | TGTATGATATTT           |  |
| M0013 |            |         |      |     |                         | GTATGATATTTGAGTAATTAA- |  |
| 8     | V\$OCT1_04 | 0.79862 | 7513 | (-) | NNNNNNNNWATGCAAATNNNWNW | GA                     |  |
| M0013 |            | 0.79702 |      |     |                         |                        |  |
| 5     | V\$OCT1_01 | 4       | 7515 | (-) | NNNNWTATGCAAATNTNNN     | ATGATATTTGAGTAATTAA    |  |
| M0016 |            | 0.82695 |      |     |                         |                        |  |
| 2     | V\$OCT1_06 | 3       | 7517 | (-) | CWNAWTKWSATRYN          | GATATTTGAGTAAT         |  |
| M0013 |            | 0.90557 |      |     |                         |                        |  |
| 7     | V\$OCT1_03 | 1       | 7523 | (+) | NNNRTAATNANNN           | TGAGTAATTAAGA          |  |
| M0013 |            | 0.84037 |      |     |                         |                        |  |
| 7     | V\$OCT1_03 | 9       | 7524 | (-) | NNNRTAATNANNN           | GAGTAATTAAGAG          |  |
| M0016 |            | 0.82148 |      |     |                         |                        |  |
| 2     | V\$OCT1_06 | 4       | 7545 | (-) | CWNAWTKWSATRYN          | AAAAATCAATAATG         |  |
| M0013 |            | 0.85894 |      |     |                         |                        |  |
| 7     | V\$OCT1_03 | 9       | 7550 | (+) | NNNRTAATNANNN           | TCAATAATGAATG          |  |
| M0013 |            | 0.81325 |      |     |                         | TTCCAAAATAAGCATAGCTGA- |  |
| 8     | V\$OCT1_04 | 8       | 7564 | (-) | NNNNNNNNWATGCAAATNNNWNW | GA                     |  |
| M0013 |            | 0.78767 |      |     |                         |                        |  |
| 5     | V\$OCT1_01 | 6       | 7566 | (-) | NNNNWTATGCAAATNTNNN     | CCAAAATAAGCATAGCTGA    |  |
| M0024 |            | 0.86898 |      |     |                         |                        |  |
| 8     | V\$OCT1_07 | 5       | 7570 | (-) | TNTATGNTAATT            | AATAAGCATAGC           |  |
| M0016 |            | 0.85507 |      |     |                         |                        |  |
| 2     | V\$OCT1_06 | 8       | 7598 | (+) | CWNAWTKWSATRYN          | CAGCATTAGTTATA         |  |
| M0013 |            | 0.87475 |      |     |                         |                        |  |
| 7     | V\$OCT1_03 | 3       | 7606 | (+) | NNNRTAATNANNN           | GTTATAAATAGAA          |  |
| M0013 |            | 0.79101 |      |     |                         |                        |  |
| 6     | V\$OCT1_02 | 2       | 7611 | (-) | NNGAATATKCANNNN         | AAATAGAATAAGCTG        |  |
| M0024 |            | 0.79372 |      |     |                         |                        |  |
| 8     | V\$OCT1_07 | 5       | 7611 | (-) | TNTATGNTAATT            | AAATAGAATAAG           |  |
| M0016 |            | 0.85546 |      |     |                         |                        |  |
| 2     | V\$OCT1_06 | 9       | 7652 | (-) | CWNAWTKWSATRYN          | CAGATCTCAATGTC         |  |
| M0016 |            | 0.83984 |      |     |                         |                        |  |
| 2     | V\$OCT1_06 | 4       | 7680 | (+) | CWNAWTKWSATRYN          | GAGATTCTGATTTA         |  |
| M0016 |            | 0.86054 |      |     |                         |                        |  |
| 2     | V\$OCT1_06 | 7       | 7686 | (+) | CWNAWTKWSATRYN          | CTGATTAACTGTT          |  |
| M0016 |            | 0.81210 |      |     |                         |                        |  |
| 2     | V\$OCT1_06 | 9       | 7731 | (+) | CWNAWTKWSATRYN          | AATAATATCATGGA         |  |
| M0016 |            | 0.84765 |      |     |                         |                        |  |
| 2     | V\$OCT1_06 | 6       | 7767 | (+) | CWNAWTKWSATRYN          | AGAACTTAGATGAA         |  |
| M0024 |            | 0.83442 |      |     |                         |                        |  |
| 8     | V\$OCT1_07 | 9       | 7789 | (-) | TNTATGNTAATT            | AGTTACAATAAA           |  |
| M0016 |            | 0.82187 |      |     |                         |                        |  |
| 2     | V\$OCT1_06 | 5       | 7803 | (+) | CWNAWTKWSATRYN          | CAGAATTGAACTTG         |  |
| M0013 |            | 0.87988 |      |     |                         |                        |  |
| 7     | V\$OCT1_03 | 9       | 7814 | (+) | NNNRTAATNANNN           | TTGATAATCTCAT          |  |
| M0016 |            | 0.85546 |      |     |                         |                        |  |
| 2     | V\$OCT1_06 | 9       | 7816 | (+) | CWNAWTKWSATRYN          | GATAATCTCATTTG         |  |
| M0016 |            | 0.81757 |      |     |                         |                        |  |
| 2     | V\$OCT1_06 | 8       | 7817 | (-) | CWNAWTKWSATRYN          | ATAATCTCATTTGG         |  |
| M0013 |            | 0.78837 |      |     |                         | TAATCTCATTTGGCTAAGAA-  |  |
| 8     | V\$OCT1_04 | 3       | 7818 | (-) | NNNNNNNNWATGCAAATNNNWNW | TAA                    |  |
| M0016 |            | 0.80078 |      |     |                         |                        |  |
| 2     | V\$OCT1_06 | 1       | 7834 | (-) | CWNAWTKWSATRYN          | AGAATAACAAACCT         |  |
| M0013 |            | 0.81911 |      |     |                         |                        |  |
| 8     | V\$OCT1_04 | 3       | 7865 | (-) | NNNNNNNNWATGCAAATNNNWNW | TCTACAATTTGAAGTTTTCCTT |  |
| M0016 |            | 0.81367 |      |     |                         |                        |  |
| 2     | V\$OCT1_06 | 2       | 7869 | (+) | CWNAWTKWSATRYN          | CAATTTTGAAGTTT         |  |
| M0016 |            | 0.80820 |      |     |                         |                        |  |
| 2     | V\$OCT1_06 | 3       | 7870 | (+) | CWNAWTKWSATRYN          | AATTTTGAAGTTTT         |  |
| M0013 |            | 0.78502 |      |     |                         |                        |  |
| 8     | V\$OCT1_04 | 7       | 7879 | (-) | NNNNNNNNWATGCAAATNNNWNW | GTTTTCTTATGCACAATTATT  |  |
| M0013 |            | 0.84907 |      |     |                         |                        |  |
| 7     | V\$OCT1_03 | 2       | 7880 | (-) | NNNRTAATNANNN           | TTTTCTTATGCA           |  |
| M0013 |            | 0.81228 |      |     |                         |                        |  |
| 5     | V\$OCT1_01 | 5       | 7882 | (+) | NNNNWTATGCAAATNTNNN     | TTCCTTATGCACAATTATT    |  |

|       |            |         |      |     |                        |                         |
|-------|------------|---------|------|-----|------------------------|-------------------------|
| M0013 |            | 0.79750 |      |     |                        |                         |
| 6     | V\$OCT1_02 | 9       | 7882 | (+) | NNGAATATKCANNNN        | TTCCTTATGCACAAT         |
| M0013 |            | 0.86843 |      |     |                        |                         |
| 7     | V\$OCT1_03 | 1       | 7889 | (+) | NNNRTAATNANNN          | TGCACAATTATTT           |
| M0016 |            | 0.83945 |      |     |                        |                         |
| 2     | V\$OCT1_06 | 3       | 7925 | (+) | CWNAWTKWSATRYN         | TTGTTTTTGATATA          |
| M0016 |            | 0.83437 |      |     |                        |                         |
| 2     | V\$OCT1_06 | 5       | 7927 | (+) | CWNAWTKWSATRYN         | GTTTTTGATATATG          |
| M0013 |            | 0.80637 |      |     |                        |                         |
| 5     | V\$OCT1_01 | 2       | 7933 | (-) | NNNNWTATGCAAATNTNNN    | GATATATGAGCATATGAGG     |
| M0016 |            | 0.80937 |      |     |                        |                         |
| 2     | V\$OCT1_06 | 5       | 7935 | (-) | CWNAWTKWSATRYN         | TATATGAGCATATG          |
| M0013 |            | 0.79588 |      |     |                        |                         |
| 6     | V\$OCT1_02 | 5       | 7937 | (-) | NNGAATATKCANNNN        | TATGAGCATATGAGG         |
| M0016 |            | 0.94531 |      |     |                        |                         |
| 2     | V\$OCT1_06 | 2       | 7956 | (+) | CWNAWTKWSATRYN         | AATACTGAGATGCT          |
| M0013 |            |         |      |     |                        | ATACTGAGATGCTTATTTCAA-  |
| 8     | V\$OCT1_04 | 0.82476 | 7957 | (+) | NNNNNNNWATGCAAATNNWNNW | TA                      |
| M0013 |            | 0.74723 |      |     |                        |                         |
| 5     | V\$OCT1_01 | 4       | 7959 | (+) | NNNNWTATGCAAATNTNNN    | ACTGAGATGCTTATTTCAA     |
| M0013 |            | 0.76154 |      |     |                        |                         |
| 5     | V\$OCT1_01 | 1       | 7966 | (-) | NNNNWTATGCAAATNTNNN    | TGCTTATTTCAAACTCAG      |
| M0016 |            | 0.87890 |      |     |                        |                         |
| 2     | V\$OCT1_06 | 6       | 7968 | (+) | CWNAWTKWSATRYN         | CTTATTTCAAACT           |
| M0016 |            | 0.82695 |      |     |                        |                         |
| 2     | V\$OCT1_06 | 3       | 7968 | (-) | CWNAWTKWSATRYN         | CTTATTTCAAACT           |
| M0019 |            | 0.81550 |      |     |                        |                         |
| 5     | V\$OCT1_Q6 | 2       | 7968 | (-) | NNNNATGCAAATNAN        | CTTATTTCAAACTC          |
| M0013 |            | 0.77422 |      |     |                        |                         |
| 6     | V\$OCT1_02 | 8       | 7970 | (-) | NNGAATATKCANNNN        | TATTTCAAACTCAG          |
| M0024 |            | 0.79605 |      |     |                        |                         |
| 8     | V\$OCT1_07 | 7       | 7970 | (-) | TNTATGNTAATT           | TATTTCAAACT             |
| M0013 |            | 0.78722 |      |     |                        |                         |
| 6     | V\$OCT1_02 | 3       | 7973 | (+) | NNGAATATKCANNNN        | TTCAATACTCAGGGA         |
| M0016 |            | 0.85507 |      |     |                        |                         |
| 2     | V\$OCT1_06 | 8       | 7987 | (+) | CWNAWTKWSATRYN         | AAAATTTTCTTGCC          |
| M0013 |            |         |      |     |                        |                         |
| 5     | V\$OCT1_01 | 0.76612 | 8006 | (-) | NNNNWTATGCAAATNTNNN    | GCAAGAATTGTATAATTCA     |
| M0013 |            | 0.77341 |      |     |                        |                         |
| 6     | V\$OCT1_02 | 6       | 8014 | (+) | NNGAATATKCANNNN        | TGTATAATTCATTCA         |
| M0016 |            | 0.82109 |      |     |                        |                         |
| 2     | V\$OCT1_06 | 4       | 8015 | (+) | CWNAWTKWSATRYN         | GTATAATTCATTCA          |
| M0016 |            | 0.83437 |      |     |                        |                         |
| 2     | V\$OCT1_06 | 5       | 8016 | (-) | CWNAWTKWSATRYN         | TATAATTCATTAC           |
| M0016 |            | 0.84492 |      |     |                        |                         |
| 2     | V\$OCT1_06 | 2       | 8029 | (+) | CWNAWTKWSATRYN         | CTTATTTTATTTTA          |
| M0024 |            | 0.83167 |      |     |                        |                         |
| 8     | V\$OCT1_07 | 3       | 8034 | (+) | TNTATGNTAATT           | TTTATTTTATTT            |
| M0013 |            | 0.81681 |      |     |                        |                         |
| 8     | V\$OCT1_04 | 3       | 8037 | (-) | NNNNNNNWATGCAAATNNWNNW | ATTTTATTTTAAATTTTAAGG   |
| M0016 |            | 0.83437 |      |     |                        |                         |
| 2     | V\$OCT1_06 | 5       | 8041 | (+) | CWNAWTKWSATRYN         | TATTTTAAATTTT           |
| M0024 |            | 0.83167 |      |     |                        |                         |
| 8     | V\$OCT1_07 | 3       | 8041 | (+) | TNTATGNTAATT           | TATTTTAAATT             |
| M0016 |            | 0.80039 |      |     |                        |                         |
| 2     | V\$OCT1_06 | 1       | 8042 | (+) | CWNAWTKWSATRYN         | ATTTTAAATTTT            |
| M0013 |            | 0.78460 |      |     |                        |                         |
| 8     | V\$OCT1_04 | 9       | 8044 | (-) | NNNNNNNWATGCAAATNNWNNW | TTTTTAATTTTAAAGGTCTAAGA |
| M0013 |            |         |      |     |                        | TAAGAGGAT-              |
| 8     | V\$OCT1_04 | 0.7821  | 8062 | (-) | NNNNNNNWATGCAAATNNWNNW | TTCAATGTGAATGC          |
| M0016 |            | 0.82187 |      |     |                        |                         |
| 2     | V\$OCT1_06 | 5       | 8066 | (+) | CWNAWTKWSATRYN         | AGGATTTCATGTG           |
| M0016 |            | 0.88164 |      |     |                        |                         |
| 2     | V\$OCT1_06 | 1       | 8066 | (-) | CWNAWTKWSATRYN         | AGGATTTCATGTG           |
| M0013 |            | 0.80991 |      |     |                        |                         |
| 8     | V\$OCT1_04 | 2       | 8126 | (-) | NNNNNNNWATGCAAATNNWNNW | ACTGATCATTTTATAGTTAATA  |

|       |            |         |      |     |                        |                         |
|-------|------------|---------|------|-----|------------------------|-------------------------|
| M0019 |            | 0.81959 |      |     |                        |                         |
| 5     | V\$OCT1_Q6 | 6       | 8130 | (-) | NNNNATGCAAATNAN        | ATCATTTTTATAGTT         |
| M0016 |            | 0.80820 |      |     |                        |                         |
| 2     | V\$OCT1_06 | 3       | 8138 | (-) | CWNAWTKWSATRYN         | TATAGTTAATATCT          |
| M0013 |            | 0.84274 |      |     |                        |                         |
| 8     | V\$OCT1_04 | 4       | 8144 | (-) | NNNNNNNWATGCAAATNNNWNW | TAATATCTTTTACATTTAATTTT |
| M0016 |            | 0.89843 |      |     |                        |                         |
| 2     | V\$OCT1_06 | 7       | 8148 | (+) | CWNAWTKWSATRYN         | ATCTTTTACATTTA          |
| M0016 |            | 0.83437 |      |     |                        |                         |
| 2     | V\$OCT1_06 | 5       | 8153 | (+) | CWNAWTKWSATRYN         | TTACATTTAATTTT          |
| M0016 |            | 0.95312 |      |     |                        |                         |
| 2     | V\$OCT1_06 | 5       | 8154 | (-) | CWNAWTKWSATRYN         | TACATTTAATTTTC          |
| M0013 |            | 0.83458 |      |     |                        | ACATTTAATTTTCTGGATAA-   |
| 8     | V\$OCT1_04 | 8       | 8155 | (-) | NNNNNNNWATGCAAATNNNWNW | GA                      |
| M0013 |            | 0.79067 |      |     |                        | AGTAGCAATTTCTATCAG-     |
| 8     | V\$OCT1_04 | 3       | 8184 | (-) | NNNNNNNWATGCAAATNNNWNW | TATAC                   |
| M0013 |            | 0.76001 |      |     |                        |                         |
| 5     | V\$OCT1_01 | 5       | 8200 | (-) | NNNNWTATGCAAATNTNNN    | AGTATACCAGCATAAAGAT     |
| M0013 |            | 0.87791 |      |     |                        |                         |
| 7     | V\$OCT1_03 | 4       | 8208 | (+) | NNNRTAATNANNN          | AGCATAAAGATTA           |
| M0016 |            | 0.80937 |      |     |                        |                         |
| 2     | V\$OCT1_06 | 5       | 8208 | (-) | CWNAWTKWSATRYN         | AGCATAAAGATTAG          |
| M0013 |            | 0.83479 |      |     |                        |                         |
| 8     | V\$OCT1_04 | 7       | 8215 | (-) | NNNNNNNWATGCAAATNNNWNW | AGATTAGTTTTAAATTTATTTTC |
| M0016 |            | 0.82929 |      |     |                        |                         |
| 2     | V\$OCT1_06 | 7       | 8219 | (+) | CWNAWTKWSATRYN         | TAGTTTTAAATTTA          |
| M0016 |            | 0.83945 |      |     |                        |                         |
| 2     | V\$OCT1_06 | 3       | 8220 | (-) | CWNAWTKWSATRYN         | AGTTTTAAATTTAT          |
| M0016 |            | 0.88906 |      |     |                        |                         |
| 2     | V\$OCT1_06 | 2       | 8259 | (-) | CWNAWTKWSATRYN         | GACCTGAAATTATG          |
| M0016 |            | 0.82656 |      |     |                        |                         |
| 2     | V\$OCT1_06 | 2       | 8272 | (+) | CWNAWTKWSATRYN         | GTATCTGTTATATT          |
| M0013 |            | 0.79715 |      |     |                        |                         |
| 8     | V\$OCT1_04 | 6       | 8275 | (+) | NNNNNNNWATGCAAATNNNWNW | TCTGTTATATTTCAAATAATGCA |
| M0016 |            | 0.84726 |      |     |                        |                         |
| 2     | V\$OCT1_06 | 6       | 8280 | (-) | CWNAWTKWSATRYN         | TATATTTCAAATAA          |
| M0016 |            | 0.86015 |      |     |                        |                         |
| 2     | V\$OCT1_06 | 6       | 8282 | (-) | CWNAWTKWSATRYN         | TATTTCAAATAATG          |
| M0013 |            | 0.83396 |      |     |                        | TTCAAATAATGCAAACTG-     |
| 8     | V\$OCT1_04 | 1       | 8285 | (+) | NNNNNNNWATGCAAATNNNWNW | TATA                    |
| M0013 |            | 0.81686 |      |     |                        |                         |
| 5     | V\$OCT1_01 | 4       | 8287 | (+) | NNNNWTATGCAAATNTNNN    | CAAATAATGCAAACTGTA      |
| M0019 |            | 0.80867 |      |     |                        |                         |
| 5     | V\$OCT1_Q6 | 9       | 8289 | (+) | NNNNATGCAAATNAN        | AATAATGCAAACTG          |
| M0016 |            | 0.83476 |      |     |                        |                         |
| 2     | V\$OCT1_06 | 6       | 8290 | (-) | CWNAWTKWSATRYN         | ATAATGCAAACTG           |
| M0013 |            | 0.81681 |      |     |                        | ATGCAAACTG-             |
| 8     | V\$OCT1_04 | 3       | 8293 | (+) | NNNNNNNWATGCAAATNNNWNW | TATATATATGGT            |
| M0016 |            | 0.80429 |      |     |                        |                         |
| 2     | V\$OCT1_06 | 7       | 8296 | (+) | CWNAWTKWSATRYN         | CAAACTGTATATA           |
| M0013 |            | 0.78732 |      |     |                        |                         |
| 8     | V\$OCT1_04 | 7       | 8331 | (-) | NNNNNNNWATGCAAATNNNWNW | TGGTTTTCTTTCAATTGCCTATA |
| M0024 |            | 0.80029 |      |     |                        |                         |
| 8     | V\$OCT1_07 | 7       | 8350 | (+) | TNTATGNTAATT           | TATATCCTTATT            |
| M0013 |            | 0.84116 |      |     |                        |                         |
| 7     | V\$OCT1_03 | 9       | 8351 | (-) | NNNRTAATNANNN          | ATATCCTTATTAT           |
| M0013 |            |         |      |     |                        |                         |
| 7     | V\$OCT1_03 | 0.9032  | 8354 | (-) | NNNRTAATNANNN          | TCCTTATTATTGA           |
| M0013 |            | 0.91979 |      |     |                        |                         |
| 7     | V\$OCT1_03 | 5       | 8366 | (+) | NNNRTAATNANNN          | ATTGTAATCATTT           |
| M0013 |            | 0.78000 |      |     |                        | AATCATTTATA-            |
| 8     | V\$OCT1_04 | 8       | 8371 | (+) | NNNNNNNWATGCAAATNNNWNW | GAAAAAACTGAA            |
| M0013 |            | 0.80426 |      |     |                        | AGAAAAAACTGAAAA-        |
| 8     | V\$OCT1_04 | 6       | 8381 | (+) | NNNNNNNWATGCAAATNNNWNW | TAATTTCT                |
| M0019 |            | 0.81877 |      |     |                        |                         |
| 5     | V\$OCT1_Q6 | 7       | 8385 | (+) | NNNNATGCAAATNAN        | AAAACTGAAAAATAAT        |

|       |            |         |      |     |                        |                         |
|-------|------------|---------|------|-----|------------------------|-------------------------|
| M0016 |            | 0.83945 |      |     |                        |                         |
| 2     | V\$OCT1_06 | 3       | 8386 | (-) | CWNAWTKWSATRYN         | AAACTGAAAATAAT          |
| M0016 |            | 0.86796 |      |     |                        |                         |
| 2     | V\$OCT1_06 | 9       | 8394 | (+) | CWNAWTKWSATRYN         | AATAATTTCTTATA          |
| M0016 |            | 0.81210 |      |     |                        |                         |
| 2     | V\$OCT1_06 | 9       | 8404 | (+) | CWNAWTKWSATRYN         | TATACTTTTATGTA          |
| M0013 |            | 0.78042 |      |     |                        |                         |
| 8     | V\$OCT1_04 | 7       | 8405 | (+) | NNNNNNNWATGCAAATNNNWNW | ATACTTTTATGTAAACCTGTTAG |
| M0013 |            | 0.76039 |      |     |                        |                         |
| 5     | V\$OCT1_01 | 7       | 8407 | (+) | NNNNWTATGCAAATNTNNN    | ACTTTTATGTAAACCTGTT     |
| M0016 |            | 0.81210 |      |     |                        |                         |
| 2     | V\$OCT1_06 | 9       | 8410 | (-) | CWNAWTKWSATRYN         | TTTATGTAAACCTG          |
| M0016 |            | 0.82148 |      |     |                        |                         |
| 2     | V\$OCT1_06 | 4       | 8442 | (+) | CWNAWTKWSATRYN         | ATCAACTGCATTCA          |
| M0016 |            | 0.83437 |      |     |                        |                         |
| 2     | V\$OCT1_06 | 5       | 8448 | (-) | CWNAWTKWSATRYN         | TGCATTACATTTC           |
| M0019 |            | 0.79803 |      |     |                        |                         |
| 5     | V\$OCT1_Q6 | 5       | 8448 | (-) | NNNNATGCAAATNAN        | TGCATTACATTCT           |
| M0013 |            | 0.94863 |      |     |                        |                         |
| 7     | V\$OCT1_03 | 7       | 8467 | (-) | NNNRATAATNANN          | TAGTCATTATGAG           |
| M0016 |            | 0.85507 |      |     |                        |                         |
| 2     | V\$OCT1_06 | 8       | 8471 | (+) | CWNAWTKWSATRYN         | CATTATGAGCTTCA          |
| M0013 |            | 0.78293 |      |     |                        |                         |
| 8     | V\$OCT1_04 | 6       | 8486 | (-) | NNNNNNNWATGCAAATNNNWNW | TTGTTTTATCTCACTTAAAATTT |
| M0013 |            | 0.79130 |      |     |                        |                         |
| 8     | V\$OCT1_04 | 1       | 8491 | (+) | NNNNNNNWATGCAAATNNNWNW | TTATCTCACTTAAAATTTATATA |
| M0013 |            | 0.78460 |      |     |                        |                         |
| 8     | V\$OCT1_04 | 9       | 8492 | (-) | NNNNNNNWATGCAAATNNNWNW | TATCTCACTTAAAATTTATATAT |
| M0016 |            | 0.82695 |      |     |                        |                         |
| 2     | V\$OCT1_06 | 3       | 8495 | (+) | CWNAWTKWSATRYN         | CTCACTTAAAATTT          |
| M0013 |            | 0.83291 |      |     |                        |                         |
| 8     | V\$OCT1_04 | 5       | 8498 | (-) | NNNNNNNWATGCAAATNNNWNW | ACTTAAAATTTATATATTGTCTT |
| M0013 |            | 0.80579 |      |     |                        |                         |
| 5     | V\$OCT1_01 | 9       | 8500 | (-) | NNNNWTATGCAAATNTNNN    | TTAAAATTTATATATTGTC     |
| M0013 |            | 0.78816 |      |     |                        |                         |
| 8     | V\$OCT1_04 | 4       | 8500 | (-) | NNNNNNNWATGCAAATNNNWNW | TTAAAATTTATATATTGTCTTTT |
| M0016 |            |         |      |     |                        |                         |
| 2     | V\$OCT1_06 | 0.88125 | 8502 | (+) | CWNAWTKWSATRYN         | AAAATTTATATATT          |
| M0016 |            | 0.83437 |      |     |                        |                         |
| 2     | V\$OCT1_06 | 5       | 8502 | (-) | CWNAWTKWSATRYN         | AAAATTTATATATT          |
| M0024 |            | 0.84820 |      |     |                        |                         |
| 8     | V\$OCT1_07 | 9       | 8504 | (-) | TNTATGNTAATT           | AATTTATATATT            |
| M0016 |            | 0.81367 |      |     |                        |                         |
| 2     | V\$OCT1_06 | 2       | 8515 | (+) | CWNAWTKWSATRYN         | TGTCTTTTAATTCA          |
| M0024 |            | 0.83654 |      |     |                        |                         |
| 8     | V\$OCT1_07 | 9       | 8515 | (+) | TNTATGNTAATT           | TGTCTTTTAATT            |
| M0016 |            | 0.81367 |      |     |                        |                         |
| 2     | V\$OCT1_06 | 2       | 8534 | (-) | CWNAWTKWSATRYN         | CAAAATACAATTTTC         |
| M0013 |            | 0.80427 |      |     |                        |                         |
| 5     | V\$OCT1_01 | 3       | 8571 | (-) | NNNNWTATGCAAATNTNNN    | AGGGGAATAGCATATAGTT     |
| M0016 |            | 0.83476 |      |     |                        |                         |
| 2     | V\$OCT1_06 | 6       | 8573 | (+) | CWNAWTKWSATRYN         | GGGAATAGCATATA          |
| M0019 |            | 0.82396 |      |     |                        |                         |
| 5     | V\$OCT1_Q6 | 3       | 8573 | (-) | NNNNATGCAAATNAN        | GGGAATAGCATATAG         |
| M0013 |            |         |      |     |                        |                         |
| 6     | V\$OCT1_02 | 0.79399 | 8575 | (-) | NNGAATATKCANNNN        | GAATAGCATATAGTT         |
| M0024 |            | 0.79923 |      |     |                        |                         |
| 8     | V\$OCT1_07 | 7       | 8575 | (-) | TNTATGNTAATT           | GAATAGCATATA            |
| M0016 |            | 0.83281 |      |     |                        |                         |
| 2     | V\$OCT1_06 | 2       | 8579 | (-) | CWNAWTKWSATRYN         | AGCATATAGTTTTG          |
| M0016 |            | 0.85234 |      |     |                        |                         |
| 2     | V\$OCT1_06 | 4       | 8584 | (+) | CWNAWTKWSATRYN         | ATAGTTTTGATATT          |
| M0013 |            | 0.78018 |      |     |                        |                         |
| 6     | V\$OCT1_02 | 4       | 8586 | (-) | NNGAATATKCANNNN        | AGTTTTGATATTCTT         |
| M0016 |            | 0.82148 |      |     |                        |                         |
| 2     | V\$OCT1_06 | 4       | 8586 | (+) | CWNAWTKWSATRYN         | AGTTTTGATATTCT          |

|       |            |         |      |     |                        |                         |  |
|-------|------------|---------|------|-----|------------------------|-------------------------|--|
| M0013 |            | 0.80008 |      |     |                        |                         |  |
| 8     | V\$OCT1_04 | 4       | 8587 | (+) | NNNNNNNWATGCAAATNNNWNW | GTTTTGATATTCTTAAAGATATA |  |
| M0013 |            | 0.80075 |      |     |                        |                         |  |
| 6     | V\$OCT1_02 | 8       | 8589 | (+) | NNGAATATKCANNNN        | TTTGATATTCTTAAA         |  |
| M0013 |            | 0.86013 |      |     |                        |                         |  |
| 7     | V\$OCT1_03 | 4       | 8596 | (+) | NNNRTAATNANNN          | TTCTTAAAGATAT           |  |
| M0013 |            | 0.82183 |      |     |                        |                         |  |
| 8     | V\$OCT1_04 | 2       | 8598 | (-) | NNNNNNNWATGCAAATNNNWNW | CTTAAAGATATACATCTTTTGT  |  |
| M0016 |            | 0.81718 |      |     |                        |                         |  |
| 2     | V\$OCT1_06 | 7       | 8598 | (+) | CWNAWTKWSATRYN         | CTTAAAGATATACA          |  |
| M0016 |            | 0.81210 |      |     |                        |                         |  |
| 2     | V\$OCT1_06 | 9       | 8608 | (-) | CWNAWTKWSATRYN         | TACATCTTTTGTG           |  |
| M0013 |            | 0.78983 |      |     |                        | CAGCAGACATTTTAA-        |  |
| 8     | V\$OCT1_04 | 7       | 8631 | (+) | NNNNNNNWATGCAAATNNNWNW | TAAAACAA                |  |
| M0013 |            | 0.80614 |      |     |                        | AGCAGACATTTTAA-         |  |
| 8     | V\$OCT1_04 | 8       | 8632 | (-) | NNNNNNNWATGCAAATNNNWNW | TAAAACAAT               |  |
| M0013 |            | 0.75238 |      |     |                        |                         |  |
| 5     | V\$OCT1_01 | 5       | 8634 | (-) | NNNNWTATGCAAATNTNNN    | CAGACATTTTAATAAAACA     |  |
| M0016 |            | 0.83984 |      |     |                        |                         |  |
| 2     | V\$OCT1_06 | 4       | 8636 | (+) | CWNAWTKWSATRYN         | GACATTTTAATAAA          |  |
| M0016 |            |         |      |     |                        |                         |  |
| 2     | V\$OCT1_06 | 0.80625 | 8651 | (-) | CWNAWTKWSATRYN         | CAATTCCAAGTGAG          |  |
| M0013 |            | 0.78965 |      |     |                        |                         |  |
| 6     | V\$OCT1_02 | 9       | 8679 | (-) | NNGAATATKCANNNN        | TAGAGGAATTTTAT          |  |
| M0013 |            | 0.83103 |      |     |                        |                         |  |
| 8     | V\$OCT1_04 | 3       | 8679 | (-) | NNNNNNNWATGCAAATNNNWNW | TAGAGGAATTTTATAACCTTA   |  |
| M0013 |            | 0.74265 |      |     |                        |                         |  |
| 5     | V\$OCT1_01 | 5       | 8681 | (-) | NNNNWTATGCAAATNTNNN    | GAGGAATTTTATAACCTT      |  |
| M0019 |            | 0.80349 |      |     |                        |                         |  |
| 5     | V\$OCT1_Q6 | 3       | 8683 | (-) | NNNNATGCAAATNAN        | GGAATTTTATAACC          |  |
| M0013 |            |         |      |     |                        |                         |  |
| 8     | V\$OCT1_04 | 0.7821  | 8717 | (-) | NNNNNNNWATGCAAATNNNWNW | TGGTGTTTTGTAAATAAGATTTC |  |
| M0016 |            | 0.80585 |      |     |                        |                         |  |
| 2     | V\$OCT1_06 | 9       | 8721 | (+) | CWNAWTKWSATRYN         | GTTTTGTAAATAAG          |  |
| M0013 |            | 0.94152 |      |     |                        |                         |  |
| 7     | V\$OCT1_03 | 5       | 8724 | (+) | NNNRTAATNANNN          | TTTGTAAATAAGAT          |  |
| M0013 |            | 0.78335 |      |     |                        | TTTCTTTATGAAAAAGTCACA   |  |
| 8     | V\$OCT1_04 | 4       | 8736 | (+) | NNNNNNNWATGCAAATNNNWNW | C                       |  |
| M0013 |            | 0.77985 |      |     |                        |                         |  |
| 5     | V\$OCT1_01 | 5       | 8738 | (+) | NNNNWTATGCAAATNTNNN    | TCTTTTATGAAAAAGTCAC     |  |
| M0016 |            | 0.83437 |      |     |                        |                         |  |
| 2     | V\$OCT1_06 | 5       | 8741 | (-) | CWNAWTKWSATRYN         | TTTATGAAAAAGTC          |  |
| M0016 |            | 0.86054 |      |     |                        |                         |  |
| 2     | V\$OCT1_06 | 7       | 8759 | (+) | CWNAWTKWSATRYN         | CAAAATTGGAAATG          |  |
| M0016 |            | 0.84218 |      |     |                        |                         |  |
| 2     | V\$OCT1_06 | 7       | 8786 | (+) | CWNAWTKWSATRYN         | AGTTATAACATATA          |  |
| M0013 |            | 0.78230 |      |     |                        | TTATAACATA-             |  |
| 8     | V\$OCT1_04 | 9       | 8788 | (-) | NNNNNNNWATGCAAATNNNWNW | TAAGTGAATGTAC           |  |
| M0013 |            | 0.81429 |      |     |                        |                         |  |
| 6     | V\$OCT1_02 | 3       | 8798 | (-) | NNGAATATKCANNNN        | TAAGTGAATGTACAT         |  |
| M0016 |            |         |      |     |                        |                         |  |
| 2     | V\$OCT1_06 | 0.88125 | 8802 | (-) | CWNAWTKWSATRYN         | TGAATGTACATTG           |  |
| M0024 |            | 0.81725 |      |     |                        |                         |  |
| 8     | V\$OCT1_07 | 7       | 8802 | (+) | TNTATGNTAATT           | TGAATGTACATT            |  |
| M0016 |            | 0.84257 |      |     |                        |                         |  |
| 2     | V\$OCT1_06 | 8       | 8828 | (+) | CWNAWTKWSATRYN         | CAGAATTGACTGCG          |  |
| M0016 |            | 0.81367 |      |     |                        |                         |  |
| 2     | V\$OCT1_06 | 2       | 8840 | (+) | CWNAWTKWSATRYN         | CGACTGGAAATATG          |  |
| M0016 |            | 0.83437 |      |     |                        |                         |  |
| 2     | V\$OCT1_06 | 5       | 8855 | (+) | CWNAWTKWSATRYN         | CAACTTTTCAATCC          |  |
| M0016 |            | 0.82148 |      |     |                        |                         |  |
| 2     | V\$OCT1_06 | 4       | 8856 | (-) | CWNAWTKWSATRYN         | AACTTTTCAATCCT          |  |
| M0013 |            |         |      |     |                        |                         |  |
| 5     | V\$OCT1_01 | 0.73884 | 8862 | (-) | NNNNWTATGCAAATNTNNN    | TCAATCCTTGCATCATGCT     |  |
| M0013 |            | 0.74933 |      |     |                        |                         |  |
| 5     | V\$OCT1_01 | 2       | 8870 | (+) | NNNNWTATGCAAATNTNNN    | TGCATCATGCTACTAAGAT     |  |

|       |            |         |      |     |                         |                              |  |
|-------|------------|---------|------|-----|-------------------------|------------------------------|--|
| M0024 |            | 0.80432 |      |     |                         |                              |  |
| 8     | V\$OCT1_07 | 5       | 8881 | (+) | TNTATGNTAATT            | ACTAAGATAATT                 |  |
| M0013 |            |         |      |     |                         | AGATAATTTTTAAATGAG-          |  |
| 8     | V\$OCT1_04 | 0.83898 | 8885 | (-) | NNNNNNNNWATGCAAATNNNWNW | TATAC                        |  |
| M0016 |            | 0.82929 |      |     |                         |                              |  |
| 2     | V\$OCT1_06 | 7       | 8889 | (+) | CWNAWKWSATRYN           | AATTTTTAAATGAG               |  |
| M0016 |            | 0.85273 |      |     |                         |                              |  |
| 2     | V\$OCT1_06 | 4       | 8889 | (-) | CWNAWKWSATRYN           | AATTTTTAAATGAG               |  |
| M0013 |            | 0.73273 |      |     |                         |                              |  |
| 5     | V\$OCT1_01 | 6       | 8893 | (-) | NNNNWTATGCAAATNTNNN     | TTTAAATGAGTATACATGG          |  |
| M0013 |            | 0.83297 |      |     |                         |                              |  |
| 6     | V\$OCT1_02 | 2       | 8895 | (-) | NNGAATATKCANNNN         | TAAATGAGTATACAT              |  |
| M0024 |            | 0.80517 |      |     |                         |                              |  |
| 8     | V\$OCT1_07 | 3       | 8897 | (-) | TNTATGNTAATT            | AATGAGTATACA                 |  |
| M0013 |            | 0.79913 |      |     |                         |                              |  |
| 6     | V\$OCT1_02 | 4       | 8898 | (+) | NNGAATATKCANNNN         | ATGAGTATACATGGA              |  |
| M0016 |            | 0.84218 |      |     |                         |                              |  |
| 2     | V\$OCT1_06 | 7       | 8916 | (+) | CWNAWKWSATRYN           | AAAAATGAAACTTT               |  |
| M0016 |            | 0.81210 |      |     |                         |                              |  |
| 2     | V\$OCT1_06 | 9       | 8917 | (-) | CWNAWKWSATRYN           | AAAATGAAACTTTA               |  |
| M0013 |            | 0.78042 |      |     |                         |                              |  |
| 8     | V\$OCT1_04 | 7       | 8921 | (-) | NNNNNNNNWATGCAAATNNNWNW | TGAAACTTTATTCCTTTATTAT       |  |
| M0016 |            | 0.82656 |      |     |                         |                              |  |
| 2     | V\$OCT1_06 | 2       | 8934 | (+) | CWNAWKWSATRYN           | CTTTATTTATTTTA               |  |
| M0016 |            | 0.85507 |      |     |                         |                              |  |
| 2     | V\$OCT1_06 | 8       | 8938 | (+) | CWNAWKWSATRYN           | ATTTATTTTATGCT               |  |
| M0013 |            | 0.79182 |      |     |                         |                              |  |
| 6     | V\$OCT1_02 | 5       | 8944 | (-) | NNGAATATKCANNNN         | TTTATGCTTTTTCAT              |  |
| M0013 |            | 0.84023 |      |     |                         |                              |  |
| 8     | V\$OCT1_04 | 4       | 8944 | (-) | NNNNNNNNWATGCAAATNNNWNW | TTTATGCTTTTTCATCTTAATTT      |  |
| M0024 |            | 0.79923 |      |     |                         |                              |  |
| 8     | V\$OCT1_07 | 7       | 8944 | (+) | TNTATGNTAATT            | TTTATGCTTTTT                 |  |
| M0013 |            | 0.78377 |      |     |                         |                              |  |
| 8     | V\$OCT1_04 | 2       | 8950 | (-) | NNNNNNNNWATGCAAATNNNWNW | CTTTTTCATCTTAATTTGAATTT      |  |
| M0016 |            | 0.83046 |      |     |                         |                              |  |
| 2     | V\$OCT1_06 | 9       | 8954 | (-) | CWNAWKWSATRYN           | TTCATCTTAATTTG               |  |
| M0024 |            | 0.83739 |      |     |                         |                              |  |
| 8     | V\$OCT1_07 | 7       | 8954 | (+) | TNTATGNTAATT            | TTCATCTTAATT                 |  |
| M0013 |            | 0.81576 |      |     |                         |                              |  |
| 8     | V\$OCT1_04 | 7       | 8956 | (-) | NNNNNNNNWATGCAAATNNNWNW | CATCTTAATTTGAATTTGAGTCA      |  |
| M0013 |            | 0.74685 |      |     |                         |                              |  |
| 5     | V\$OCT1_01 | 2       | 8958 | (-) | NNNNWTATGCAAATNTNNN     | TCTTAATTTGAATTTGAGT          |  |
| M0016 |            | 0.86562 |      |     |                         |                              |  |
| 2     | V\$OCT1_06 | 5       | 8959 | (+) | CWNAWKWSATRYN           | CTTAATTTGAATTT               |  |
| M0016 |            | 0.82695 |      |     |                         |                              |  |
| 2     | V\$OCT1_06 | 3       | 8960 | (+) | CWNAWKWSATRYN           | TTAATTTGAATTTG               |  |
| M0013 |            | 0.79805 |      |     |                         |                              |  |
| 6     | V\$OCT1_02 | 1       | 8962 | (-) | NNGAATATKCANNNN         | AATTTGAATTTGAGT              |  |
| M0013 |            | 0.80112 |      |     |                         |                              |  |
| 8     | V\$OCT1_04 | 9       | 8962 | (-) | NNNNNNNNWATGCAAATNNNWNW | AATTTGAATTTGAG-<br>TCATAAACC |  |
| M0024 |            | 0.81365 |      |     |                         |                              |  |
| 8     | V\$OCT1_07 | 3       | 8962 | (-) | TNTATGNTAATT            | AATTTGAATTTG                 |  |
| M0016 |            | 0.81406 |      |     |                         |                              |  |
| 2     | V\$OCT1_06 | 2       | 8966 | (-) | CWNAWKWSATRYN           | TGAATTTGAGTCAT               |  |
| M0013 |            |         |      |     |                         | CTTTCAAATGTTAATTCAACA        |  |
| 8     | V\$OCT1_04 | 0.81514 | 8990 | (+) | NNNNNNNNWATGCAAATNNNWNW | T                            |  |
| M0013 |            | 0.80675 |      |     |                         |                              |  |
| 5     | V\$OCT1_01 | 3       | 8992 | (+) | NNNNWTATGCAAATNTNNN     | TTCAAATGTTAATTCAAC           |  |
| M0019 |            | 0.79612 |      |     |                         |                              |  |
| 5     | V\$OCT1_Q6 | 4       | 8994 | (+) | NNNNATGCAAATNAN         | CAAATGTTAATTCA               |  |
| M0016 |            | 0.82656 |      |     |                         |                              |  |
| 2     | V\$OCT1_06 | 2       | 8995 | (+) | CWNAWKWSATRYN           | AAAATGTTAATTCA               |  |
| M0024 |            | 0.91498 |      |     |                         |                              |  |
| 8     | V\$OCT1_07 | 8       | 8995 | (+) | TNTATGNTAATT            | AAAATGTTAATT                 |  |
| M0013 |            | 0.79548 |      |     |                         |                              |  |
| 8     | V\$OCT1_04 | 3       | 8996 | (+) | NNNNNNNNWATGCAAATNNNWNW | AAATGTTAATTCAACATTAG-<br>CAT |  |

|       |            |         |      |     |                         |                       |
|-------|------------|---------|------|-----|-------------------------|-----------------------|
| M0013 |            | 0.82036 |      |     |                         | ATGTTAATTCAACATTAG-   |
| 8     | V\$OCT1_04 | 8       | 8998 | (-) | NNNNNNNNWATGCAAATNNNWNW | CATAA                 |
| M0013 |            | 0.84232 |      |     |                         | ATTCAACATTAG-         |
| 8     | V\$OCT1_04 | 5       | 9004 | (-) | NNNNNNNNWATGCAAATNNNWNW | CATAAAAGTTC           |
| M0013 |            | 0.88916 |      |     |                         |                       |
| 5     | V\$OCT1_01 | 4       | 9006 | (-) | NNNNWTATGCAAATNTNNN     | TCAACATTAGCATAAAAGT   |
| M0013 |            | 0.85144 |      |     |                         |                       |
| 7     | V\$OCT1_03 | 2       | 9006 | (-) | NNNRTAATNANNN           | TCAACATTAGCAT         |
| M0024 |            |         |      |     |                         |                       |
| 8     | V\$OCT1_07 | 0.89718 | 9010 | (-) | TNTATGNTAATT            | CATTAGCATAAA          |
| M0016 |            | 0.82148 |      |     |                         |                       |
| 2     | V\$OCT1_06 | 4       | 9019 | (-) | CWNAWTKWSATRYN          | AAAAGTTCAGTTTT        |
| M0013 |            | 0.79443 |      |     |                         | GTTTTAACTTGGAAG-      |
| 8     | V\$OCT1_04 | 7       | 9028 | (+) | NNNNNNNNWATGCAAATNNNWNW | TATCATGA              |
| M0013 |            | 0.74055 |      |     |                         |                       |
| 5     | V\$OCT1_01 | 7       | 9030 | (+) | NNNNWTATGCAAATNTNNN     | TTTAACTTGGAATATCAT    |
| M0016 |            | 0.82929 |      |     |                         |                       |
| 2     | V\$OCT1_06 | 7       | 9039 | (-) | CWNAWTKWSATRYN          | GAAATATCATGAAC        |
| M0013 |            | 0.79443 |      |     |                         | ATGAACATATCAAAA-      |
| 8     | V\$OCT1_04 | 7       | 9047 | (+) | NNNNNNNNWATGCAAATNNNWNW | TATGTATA              |
| M0013 |            | 0.80531 |      |     |                         | TGAACATATCAAAA-       |
| 8     | V\$OCT1_04 | 2       | 9048 | (-) | NNNNNNNNWATGCAAATNNNWNW | TATGTATAA             |
| M0013 |            | 0.75639 |      |     |                         |                       |
| 5     | V\$OCT1_01 | 1       | 9049 | (+) | NNNNWTATGCAAATNTNNN     | GAACATATCAAAATATGTA   |
| M0016 |            | 0.80664 |      |     |                         |                       |
| 2     | V\$OCT1_06 | 1       | 9050 | (-) | CWNAWTKWSATRYN          | AACATATCAAAATA        |
| M0016 |            | 0.95585 |      |     |                         |                       |
| 2     | V\$OCT1_06 | 9       | 9052 | (-) | CWNAWTKWSATRYN          | CATATCAAAATATG        |
| M0013 |            | 0.86240 |      |     |                         | TATCAAAATATGTATAAAAA- |
| 8     | V\$OCT1_04 | 1       | 9054 | (-) | NNNNNNNNWATGCAAATNNNWNW | TAA                   |
| M0013 |            | 0.82413 |      |     |                         | ATCAAAATATGTATAAAAA-  |
| 8     | V\$OCT1_04 | 2       | 9055 | (+) | NNNNNNNNWATGCAAATNNNWNW | TAAT                  |
| M0013 |            | 0.76344 |      |     |                         |                       |
| 5     | V\$OCT1_01 | 9       | 9056 | (-) | NNNNWTATGCAAATNTNNN     | TCAAAATATGTATAAAAAAT  |
| M0013 |            | 0.81483 |      |     |                         |                       |
| 6     | V\$OCT1_02 | 5       | 9057 | (+) | NNGAATATKCANNNN         | CAAAATATGTATAAA       |
| M0013 |            | 0.84378 |      |     |                         | AAATATGTATAAAAA-      |
| 8     | V\$OCT1_04 | 9       | 9059 | (+) | NNNNNNNNWATGCAAATNNNWNW | TAATTTCT              |
| M0013 |            | 0.79548 |      |     |                         | AATATGTATAAAAA-       |
| 8     | V\$OCT1_04 | 3       | 9060 | (-) | NNNNNNNNWATGCAAATNNNWNW | TAATTTCTG             |
| M0019 |            | 0.83788 |      |     |                         |                       |
| 5     | V\$OCT1_Q6 | 2       | 9063 | (+) | NNNNATGCAAATNAN         | ATGTATAAAAAATAAT      |
| M0013 |            | 0.85499 |      |     |                         |                       |
| 7     | V\$OCT1_03 | 8       | 9064 | (+) | NNNRTAATNANNN           | TGTATAAAAAATAA        |
| M0016 |            | 0.86562 |      |     |                         |                       |
| 2     | V\$OCT1_06 | 5       | 9064 | (-) | CWNAWTKWSATRYN          | TGTATAAAAAATAAT       |
| M0016 |            | 0.83203 |      |     |                         |                       |
| 2     | V\$OCT1_06 | 1       | 9082 | (+) | CWNAWTKWSATRYN          | GGAATTGTGATTAT        |
| M0013 |            |         |      |     |                         |                       |
| 6     | V\$OCT1_02 | 0.80536 | 9085 | (-) | NNGAATATKCANNNN         | ATTGTGATTATTATT       |
| M0013 |            | 0.90478 |      |     |                         |                       |
| 7     | V\$OCT1_03 | 1       | 9086 | (-) | NNNRTAATNANNN           | TTGTGATTATTAT         |
| M0019 |            | 0.80813 |      |     |                         |                       |
| 5     | V\$OCT1_Q6 | 3       | 9088 | (-) | NNNNATGCAAATNAN         | GTGATTATTATTCT        |
| M0013 |            | 0.85420 |      |     |                         |                       |
| 7     | V\$OCT1_03 | 8       | 9089 | (-) | NNNRTAATNANNN           | TGATTATTATTTC         |
| M0013 |            | 0.84077 |      |     |                         |                       |
| 7     | V\$OCT1_03 | 4       | 9097 | (-) | NNNRTAATNANNN           | ATTTCTTTAAGAA         |
| M0016 |            | 0.82148 |      |     |                         |                       |
| 2     | V\$OCT1_06 | 4       | 9106 | (-) | CWNAWTKWSATRYN          | AGAATCTATTTCCT        |
| M0013 |            | 0.82015 |      |     |                         | ACCAGTCATTTCAA-       |
| 8     | V\$OCT1_04 | 9       | 9121 | (-) | NNNNNNNNWATGCAAATNNNWNW | TAAATTAAC             |
| M0013 |            | 0.74055 |      |     |                         |                       |
| 5     | V\$OCT1_01 | 7       | 9123 | (-) | NNNNWTATGCAAATNTNNN     | CAGTCATTTCATAAAATTA   |
| M0024 |            | 0.81047 |      |     |                         |                       |
| 8     | V\$OCT1_07 | 3       | 9127 | (-) | TNTATGNTAATT            | CATTTCATAAA           |



|       |           |         |      |     |                     |                      |
|-------|-----------|---------|------|-----|---------------------|----------------------|
| M0005 |           | 0.77686 |      |     |                     |                      |
| 9     | V\$YY1_01 | 8       | 81   | (+) | NNNNNCCATNTWNNNWN   | GCTACTCATCTTTATTT    |
| M0005 |           | 0.78112 |      |     |                     |                      |
| 9     | V\$YY1_01 | 7       | 185  | (-) | NNNNNCCATNTWNNNWN   | CAGCAAATATGTTAAAA    |
| M0005 |           | 0.77490 |      |     |                     |                      |
| 9     | V\$YY1_01 | 2       | 195  | (-) | NNNNNCCATNTWNNNWN   | GTAAAAAATAGAAGTG     |
| M0005 |           |         |      |     |                     |                      |
| 9     | V\$YY1_01 | 0.81848 | 400  | (-) | NNNNNCCATNTWNNNWN   | TTTATACTATGGGGATT    |
| M0005 |           | 0.79783 |      |     |                     |                      |
| 9     | V\$YY1_01 | 7       | 461  | (+) | NNNNNCCATNTWNNNWN   | AGCTAGCATATTTAGTC    |
| M0005 |           | 0.78014 |      |     |                     |                      |
| 9     | V\$YY1_01 | 4       | 759  | (-) | NNNNNCCATNTWNNNWN   | GTAATGAAATGGCTTAA    |
| M0005 |           | 0.77621 |      |     |                     |                      |
| 9     | V\$YY1_01 | 2       | 783  | (-) | NNNNNCCATNTWNNNWN   | TATATAAAATGCTAGTT    |
| M0005 |           | 0.82634 |      |     |                     |                      |
| 9     | V\$YY1_01 | 3       | 827  | (-) | NNNNNCCATNTWNNNWN   | CTCCCTACATGTAATGA    |
| M0005 |           | 0.78702 |      |     |                     |                      |
| 9     | V\$YY1_01 | 5       | 828  | (+) | NNNNNCCATNTWNNNWN   | TCCCTACATGTAATGAA    |
| M0005 |           | 0.78997 |      |     |                     |                      |
| 9     | V\$YY1_01 | 4       | 901  | (+) | NNNNNCCATNTWNNNWN   | TATAGACATCTTGAATA    |
| M0005 |           |         |      |     |                     |                      |
| 9     | V\$YY1_01 | 0.80308 | 980  | (-) | NNNNNCCATNTWNNNWN   | TTGAAAATCTGGGATTG    |
| M0005 |           | 0.80013 |      |     |                     |                      |
| 9     | V\$YY1_01 | 1       | 1006 | (-) | NNNNNCCATNTWNNNWN   | GTCAGAGATGTTGGTG     |
| M0006 |           |         |      |     |                     |                      |
| 9     | V\$YY1_02 | 0.7608  | 1007 | (-) | NNNCGGCCATCTGNCTSNW | TCAAGAGATGTTGGTGGCAA |
| M0005 |           | 0.81880 |      |     |                     |                      |
| 9     | V\$YY1_01 | 7       | 1024 | (+) | NNNNNCCATNTWNNNWN   | CAAGAACATTTTTTTTTT   |
| M0005 |           | 0.82470 |      |     |                     |                      |
| 9     | V\$YY1_01 | 5       | 1066 | (+) | NNNNNCCATNTWNNNWN   | ACAAACCATTTAATACA    |
| M0005 |           | 0.77686 |      |     |                     |                      |
| 9     | V\$YY1_01 | 8       | 1219 | (-) | NNNNNCCATNTWNNNWN   | CATAGTGTATGATCTCT    |
| M0005 |           | 0.77719 |      |     |                     |                      |
| 9     | V\$YY1_01 | 5       | 1252 | (-) | NNNNNCCATNTWNNNWN   | AAGGAGAGATGACATTA    |
| M0005 |           |         |      |     |                     |                      |
| 9     | V\$YY1_01 | 0.78637 | 1354 | (-) | NNNNNCCATNTWNNNWN   | ATGCTAAAATGAAACAG    |
| M0005 |           | 0.81553 |      |     |                     |                      |
| 9     | V\$YY1_01 | 1       | 1448 | (-) | NNNNNCCATNTWNNNWN   | AATAAAGTATGACCTTC    |
| M0005 |           | 0.77326 |      |     |                     |                      |
| 9     | V\$YY1_01 | 3       | 1461 | (+) | NNNNNCCATNTWNNNWN   | CTTCTTCATATACATTG    |
| M0005 |           | 0.79718 |      |     |                     |                      |
| 9     | V\$YY1_01 | 2       | 1467 | (+) | NNNNNCCATNTWNNNWN   | CATATACATTGTTTGAT    |
| M0005 |           | 0.79259 |      |     |                     |                      |
| 9     | V\$YY1_01 | 5       | 1564 | (-) | NNNNNCCATNTWNNNWN   | AGCGATATCTGGCAATA    |
| M0005 |           | 0.77752 |      |     |                     |                      |
| 9     | V\$YY1_01 | 3       | 1802 | (+) | NNNNNCCATNTWNNNWN   | TTTGGCCATATGATAAA    |
| M0005 |           |         |      |     |                     |                      |
| 9     | V\$YY1_01 | 0.81291 | 1811 | (-) | NNNNNCCATNTWNNNWN   | ATGATAAAATGTTTATT    |
| M0006 |           | 0.77204 |      |     |                     |                      |
| 9     | V\$YY1_02 | 6       | 1857 | (+) | NNNCGGCCATCTGNCTSNW | TTTTTGCCATGAGGTTTGCA |
| M0005 |           |         |      |     |                     |                      |
| 9     | V\$YY1_01 | 0.85059 | 1917 | (-) | NNNNNCCATNTWNNNWN   | CTGGAAGCATGGAGTCT    |
| M0005 |           | 0.77686 |      |     |                     |                      |
| 9     | V\$YY1_01 | 8       | 2024 | (+) | NNNNNCCATNTWNNNWN   | TTTCCTCATCTTCCCAT    |
| M0005 |           | 0.79095 |      |     |                     |                      |
| 9     | V\$YY1_01 | 7       | 2181 | (+) | NNNNNCCATNTWNNNWN   | CAACATCATAAATGTAT    |
| M0005 |           | 0.79161 |      |     |                     |                      |
| 9     | V\$YY1_01 | 2       | 2184 | (-) | NNNNNCCATNTWNNNWN   | CATCATAAATGTATAAA    |
| M0005 |           | 0.84796 |      |     |                     |                      |
| 9     | V\$YY1_01 | 9       | 2236 | (+) | NNNNNCCATNTWNNNWN   | GAAAGTCATTTATGTTC    |
| M0005 |           | 0.79357 |      |     |                     |                      |
| 9     | V\$YY1_01 | 8       | 2246 | (+) | NNNNNCCATNTWNNNWN   | TATGTTTCATCCACTATC   |
| M0005 |           | 0.77752 |      |     |                     |                      |
| 9     | V\$YY1_01 | 3       | 2490 | (-) | NNNNNCCATNTWNNNWN   | CTTACTGTAGGGTGCTA    |
| M0005 |           | 0.77850 |      |     |                     |                      |
| 9     | V\$YY1_01 | 6       | 2575 | (+) | NNNNNCCATNTWNNNWN   | TATGTTTCATAATTATAA   |

|       |           |         |      |     |                     |                      |
|-------|-----------|---------|------|-----|---------------------|----------------------|
| M0005 |           | 0.77162 |      |     |                     |                      |
| 9     | V\$YY1_01 | 5       | 2787 | (-) | NNNNNCCATNTWNNNWN   | ATTTAATAATGAGTTGA    |
| M0005 |           | 0.78309 |      |     |                     |                      |
| 9     | V\$YY1_01 | 3       | 3014 | (+) | NNNNNCCATNTWNNNWN   | AATGTTTCATTGAGAGGC   |
| M0005 |           | 0.80209 |      |     |                     |                      |
| 9     | V\$YY1_01 | 7       | 3077 | (-) | NNNNNCCATNTWNNNWN   | TTACATTAATGGCAACC    |
| M0005 |           | 0.78309 |      |     |                     |                      |
| 9     | V\$YY1_01 | 3       | 3220 | (-) | NNNNNCCATNTWNNNWN   | AGAAGGAAATGGCAACC    |
| M0005 |           | 0.78014 |      |     |                     |                      |
| 9     | V\$YY1_01 | 4       | 3236 | (+) | NNNNNCCATNTWNNNWN   | CCACTCCAGTGTCTTG     |
| M0006 |           | 0.79917 |      |     |                     |                      |
| 9     | V\$YY1_02 | 9       | 3273 | (+) | NNNCGGCCATCTGNCTSNW | GGGGAGCCTTGTAGGCTGCT |
| M0005 |           | 0.79062 |      |     |                     |                      |
| 9     | V\$YY1_01 | 9       | 3406 | (+) | NNNNNCCATNTWNNNWN   | GAAGACCCTGGTTCGAT    |
| M0005 |           | 0.77326 |      |     |                     |                      |
| 9     | V\$YY1_01 | 3       | 3456 | (+) | NNNNNCCATNTWNNNWN   | CCACTCCAGTGTCTTT     |
| M0005 |           | 0.88204 |      |     |                     |                      |
| 9     | V\$YY1_01 | 5       | 3569 | (-) | NNNNNCCATNTWNNNWN   | ATTTCTAAATGGGTTTG    |
| M0005 |           | 0.79062 |      |     |                     |                      |
| 9     | V\$YY1_01 | 9       | 3619 | (-) | NNNNNCCATNTWNNNWN   | TTTCCTTAATGAACTGT    |
| M0005 |           | 0.77817 |      |     |                     |                      |
| 9     | V\$YY1_01 | 8       | 3684 | (+) | NNNNNCCATNTWNNNWN   | CTTTGGCATTATTGAG     |
| M0005 |           | 0.78964 |      |     |                     |                      |
| 9     | V\$YY1_01 | 6       | 3742 | (-) | NNNNNCCATNTWNNNWN   | CTGGAAAGAGGGATGCA    |
| M0005 |           | 0.79652 |      |     |                     |                      |
| 9     | V\$YY1_01 | 7       | 3778 | (-) | NNNNNCCATNTWNNNWN   | ACATGCAAATGGACATA    |
| M0005 |           | 0.82044 |      |     |                     |                      |
| 9     | V\$YY1_01 | 6       | 3785 | (+) | NNNNNCCATNTWNNNWN   | AATGGACATATTTTATT    |
| M0005 |           | 0.77162 |      |     |                     |                      |
| 9     | V\$YY1_01 | 5       | 3831 | (-) | NNNNNCCATNTWNNNWN   | CATTGAGAATGAGCGTA    |
| M0005 |           | 0.77785 |      |     |                     |                      |
| 9     | V\$YY1_01 | 1       | 4023 | (+) | NNNNNCCATNTWNNNWN   | CGACCCCATAGACGGCA    |
| M0005 |           | 0.78014 |      |     |                     |                      |
| 9     | V\$YY1_01 | 4       | 4076 | (-) | NNNNNCCATNTWNNNWN   | CAAGAACACTGGAGTGG    |
| M0005 |           | 0.78309 |      |     |                     |                      |
| 9     | V\$YY1_01 | 3       | 4092 | (+) | NNNNNCCATNTWNNNWN   | GGTTGCCATTTCCTTCT    |
| M0005 |           | 0.78342 |      |     |                     |                      |
| 9     | V\$YY1_01 | 1       | 4120 | (-) | NNNNNCCATNTWNNNWN   | AAGTGAAAAGGGAAAGT    |
| M0005 |           |         |      |     |                     |                      |
| 9     | V\$YY1_01 | 0.78768 | 4196 | (-) | NNNNNCCATNTWNNNWN   | CTCTGTCCATGGGATT     |
| M0005 |           | 0.80176 |      |     |                     |                      |
| 9     | V\$YY1_01 | 9       | 4317 | (-) | NNNNNCCATNTWNNNWN   | AACTAAGAATGATTATT    |
| M0005 |           | 0.83060 |      |     |                     |                      |
| 9     | V\$YY1_01 | 3       | 4389 | (+) | NNNNNCCATNTWNNNWN   | AGACAGCATATTCAAAA    |
| M0006 |           | 0.76383 |      |     |                     |                      |
| 9     | V\$YY1_02 | 4       | 4428 | (+) | NNNCGGCCATCTGNCTSNW | TAAGGTCCATCTAGTCAAGG |
| M0005 |           | 0.85321 |      |     |                     |                      |
| 9     | V\$YY1_01 | 1       | 4429 | (+) | NNNNNCCATNTWNNNWN   | AAGGTCCATCTAGTCAA    |
| M0005 |           | 0.82929 |      |     |                     |                      |
| 9     | V\$YY1_01 | 2       | 4461 | (+) | NNNNNCCATNTWNNNWN   | AGTAGTCATGTATGGAT    |
| M0005 |           | 0.79619 |      |     |                     |                      |
| 9     | V\$YY1_01 | 9       | 4464 | (-) | NNNNNCCATNTWNNNWN   | AGTCATGTATGGATGTG    |
| M0005 |           | 0.78473 |      |     |                     |                      |
| 9     | V\$YY1_01 | 1       | 4512 | (-) | NNNNNCCATNTWNNNWN   | AAGAATAGATGCTTTTG    |
| M0006 |           | 0.78864 |      |     |                     |                      |
| 9     | V\$YY1_02 | 7       | 4751 | (-) | NNNCGGCCATCTGNCTSNW | AGATGGCTGGATGGCATCAC |
| M0005 |           | 0.80111 |      |     |                     |                      |
| 9     | V\$YY1_01 | 4       | 4753 | (-) | NNNNNCCATNTWNNNWN   | ATGGCTGGATGGCATCA    |
| M0006 |           | 0.77882 |      |     |                     |                      |
| 9     | V\$YY1_02 | 9       | 4768 | (-) | NNNCGGCCATCTGNCTSNW | CACTGACTCGATGGACGTGA |
| M0005 |           | 0.81880 |      |     |                     |                      |
| 9     | V\$YY1_01 | 7       | 4770 | (-) | NNNNNCCATNTWNNNWN   | CTGACTCGATGGACGTG    |
| M0005 |           | 0.77719 |      |     |                     |                      |
| 9     | V\$YY1_01 | 5       | 4984 | (+) | NNNNNCCATNTWNNNWN   | AGAGATCATTTGTTTTTC   |
| M0005 |           |         |      |     |                     |                      |
| 9     | V\$YY1_01 | 0.81979 | 5006 | (-) | NNNNNCCATNTWNNNWN   | GAGAAAACAGGGTGATT    |

|       |           |         |      |     |                      |                      |
|-------|-----------|---------|------|-----|----------------------|----------------------|
| M0005 |           | 0.77555 |      |     |                      |                      |
| 9     | V\$YY1_01 | 7       | 5071 | (-) | NNNNNCCATNTWNNNWN    | ATGACCCTATGGACTGT    |
| M0005 |           | 0.80340 |      |     |                      |                      |
| 9     | V\$YY1_01 | 8       | 5102 | (-) | NNNNNCCATNTWNNNWN    | CTCTGTCTATGGGATTT    |
| M0005 |           | 0.77162 |      |     |                      |                      |
| 9     | V\$YY1_01 | 5       | 5362 | (-) | NNNNNCCATNTWNNNWN    | ATAAAATAATGATATCA    |
| M0005 |           | 0.86041 |      |     |                      |                      |
| 9     | V\$YY1_01 | 9       | 5387 | (+) | NNNNNCCATNTWNNNWN    | GCTGTCCATATTAACCT    |
| M0005 |           | 0.89842 |      |     |                      |                      |
| 9     | V\$YY1_01 | 7       | 5410 | (+) | NNNNNCCATNTWNNNWN    | TGTCTTCATTTTCTGAT    |
| M0005 |           | 0.79161 |      |     |                      |                      |
| 9     | V\$YY1_01 | 2       | 5433 | (-) | NNNNNCCATNTWNNNWN    | TGACAAATATGAATTTT    |
| M0005 |           | 0.88663 |      |     |                      |                      |
| 9     | V\$YY1_01 | 2       | 5519 | (+) | NNNNNCCATNTWNNNWN    | AACCTTCATATTTAAAC    |
| M0005 |           | 0.83256 |      |     |                      |                      |
| 9     | V\$YY1_01 | 9       | 5533 | (+) | NNNNNCCATNTWNNNWN    | AACGTACATTTTTAAAA    |
| M0005 |           | 0.79259 |      |     |                      |                      |
| 9     | V\$YY1_01 | 5       | 5570 | (+) | NNNNNCCATNTWNNNWN    | AAACAGCATTTCTTTAT    |
| M0005 |           | 0.89580 |      |     |                      |                      |
| 9     | V\$YY1_01 | 6       | 5730 | (-) | NNNNNCCATNTWNNNWN    | GTCTAAGAATGGTAATA    |
| M0005 |           | 0.86795 |      |     |                      |                      |
| 9     | V\$YY1_01 | 5       | 5774 | (-) | NNNNNCCATNTWNNNWN    | TTGACAAAATGAAAATA    |
| M0005 |           | 0.84764 |      |     |                      |                      |
| 9     | V\$YY1_01 | 1       | 5802 | (+) | NNNNNCCATNTWNNNWN    | GAAACACATTTTTAAAC    |
| M0005 |           | 0.83093 |      |     |                      |                      |
| 9     | V\$YY1_01 | 1       | 5869 | (+) | NNNNNCCATNTWNNNWN    | TATATTCATTTTACTAA    |
| M0005 |           |         |      |     |                      |                      |
| 9     | V\$YY1_01 | 0.82536 | 5899 | (-) | NNNNNCCATNTWNNNWN    | TTTAATAAATGCATATT    |
| M0005 |           | 0.81618 |      |     |                      |                      |
| 9     | V\$YY1_01 | 6       | 5904 | (+) | NNNNNCCATNTWNNNWN    | TAAATGCATATTAGTAG    |
| M0005 |           | 0.82765 |      |     |                      |                      |
| 9     | V\$YY1_01 | 4       | 5955 | (-) | NNNNNCCATNTWNNNWN    | TTCTAATGATGGATATA    |
| M0005 |           | 0.77064 |      |     |                      |                      |
| 9     | V\$YY1_01 | 2       | 6006 | (+) | NNNNNCCATNTWNNNWN    | AATCCTCATTTGATCAT    |
| M0005 |           | 0.80471 |      |     |                      |                      |
| 9     | V\$YY1_01 | 8       | 6014 | (+) | NNNNNCCATNTWNNNWN    | TTTGATCATTTATCAGC    |
| M0005 |           | 0.80111 |      |     |                      |                      |
| 9     | V\$YY1_01 | 4       | 6130 | (-) | NNNNNCCATNTWNNNWN    | ACTATTCAATGGTTTTA    |
| M0005 |           | 0.80701 |      |     |                      |                      |
| 9     | V\$YY1_01 | 2       | 6168 | (+) | NNNNNCCATNTWNNNWN    | TACTCACATTTATGAAT    |
| M0005 |           | 0.78047 |      |     |                      |                      |
| 9     | V\$YY1_01 | 2       | 6259 | (+) | NNNNNCCATNTWNNNWN    | TGTGACCATACCACATA    |
| M0005 |           | 0.85779 |      |     |                      |                      |
| 9     | V\$YY1_01 | 8       | 6440 | (-) | NNNNNCCATNTWNNNWN    | AAGTCAAAATGAATTTA    |
| M0005 |           | 0.79259 |      |     |                      |                      |
| 9     | V\$YY1_01 | 5       | 6518 | (+) | NNNNNCCATNTWNNNWN    | GTTGGCCATTGTTAAGG    |
| M0005 |           | 0.79357 |      |     |                      |                      |
| 9     | V\$YY1_01 | 8       | 6551 | (+) | NNNNNCCATNTWNNNWN    | AAAACACATATTAAGAC    |
| M0005 |           | 0.78014 |      |     |                      |                      |
| 9     | V\$YY1_01 | 4       | 6570 | (+) | NNNNNCCATNTWNNNWN    | AGTTTCATTAAAACAA     |
| M0005 |           | 0.83027 |      |     |                      |                      |
| 9     | V\$YY1_01 | 5       | 6639 | (-) | NNNNNCCATNTWNNNWN    | TTTGTTATATGAAATCA    |
| M0005 |           | 0.77883 |      |     |                      |                      |
| 9     | V\$YY1_01 | 4       | 6648 | (+) | NNNNNCCATNTWNNNWN    | TGAAATCAGTTTGGACT    |
| M0005 |           | 0.77916 |      |     |                      |                      |
| 9     | V\$YY1_01 | 1       | 6822 | (-) | NNNNNCCATNTWNNNWN    | GTCTTCATATGACCCCA    |
| M0006 |           | 0.75633 |      |     |                      |                      |
| 9     | V\$YY1_02 | 7       | 6851 | (-) | NNNCGGCCATCTTGNCTSNW | ACTAAACCAAATGGAAGATT |
| M0005 |           | 0.79718 |      |     |                      |                      |
| 9     | V\$YY1_01 | 2       | 6936 | (-) | NNNNNCCATNTWNNNWN    | ACTGGATTATGGACTCA    |
| M0005 |           | 0.81880 |      |     |                      |                      |
| 9     | V\$YY1_01 | 7       | 6970 | (-) | NNNNNCCATNTWNNNWN    | TTTCCAGGATGAACTCC    |
| M0005 |           | 0.78178 |      |     |                      |                      |
| 9     | V\$YY1_01 | 2       | 6980 | (+) | NNNNNCCATNTWNNNWN    | GAACTCCAGGATAAAAT    |
| M0005 |           | 0.80733 |      |     |                      |                      |
| 9     | V\$YY1_01 | 9       | 7119 | (-) | NNNNNCCATNTWNNNWN    | CTGAAATAATGGGAGTC    |

|       |           |         |      |     |                      |                      |
|-------|-----------|---------|------|-----|----------------------|----------------------|
| M0006 |           | 0.77026 |      |     |                      |                      |
| 9     | V\$YY1_02 | 1       | 7305 | (+) | NNNCGGCCATCTTGNCTSNW | CTCCAACCGTCATGTTTCCT |
| M0006 |           | 0.79810 |      |     |                      |                      |
| 9     | V\$YY1_02 | 8       | 7308 | (+) | NNNCGGCCATCTTGNCTSNW | CAACCGTCATGTTTCCTCCT |
| M0005 |           | 0.82634 |      |     |                      |                      |
| 9     | V\$YY1_01 | 3       | 7309 | (+) | NNNNNCCATNTWNNNWN    | AACCGTCATGTTTCCTC    |
| M0005 |           | 0.78374 |      |     |                      |                      |
| 9     | V\$YY1_01 | 8       | 7336 | (+) | NNNNNCCATNTWNNNWN    | GCTGTCCCTTCTCAGC     |
| M0005 |           | 0.77195 |      |     |                      |                      |
| 9     | V\$YY1_01 | 3       | 7396 | (+) | NNNNNCCATNTWNNNWN    | TATGCCCATCCAGGCCT    |
| M0005 |           |         |      |     |                      |                      |
| 9     | V\$YY1_01 | 0.81848 | 7552 | (-) | NNNNNCCATNTWNNNWN    | AATAATGAATGGTTCCA    |
| M0005 |           | 0.81651 |      |     |                      |                      |
| 9     | V\$YY1_01 | 4       | 7646 | (+) | NNNNNCCATNTWNNNWN    | CACCACCAGATCTCAAT    |
| M0005 |           | 0.77195 |      |     |                      |                      |
| 9     | V\$YY1_01 | 3       | 7733 | (+) | NNNNNCCATNTWNNNWN    | TAATATCATGGACTATG    |
| M0005 |           | 0.79390 |      |     |                      |                      |
| 9     | V\$YY1_01 | 6       | 7768 | (-) | NNNNNCCATNTWNNNWN    | GAACTTAGATGAAGGGG    |
| M0005 |           | 0.79947 |      |     |                      |                      |
| 9     | V\$YY1_01 | 6       | 7797 | (+) | NNNNNCCATNTWNNNWN    | TAAAGCCAGAATTGAAC    |
| M0005 |           | 0.84436 |      |     |                      |                      |
| 9     | V\$YY1_01 | 4       | 7930 | (-) | NNNNNCCATNTWNNNWN    | TTTGATATATGAGCATA    |
| M0005 |           | 0.85747 |      |     |                      |                      |
| 9     | V\$YY1_01 | 1       | 8126 | (+) | NNNNNCCATNTWNNNWN    | ACTGATCATTTTTATAG    |
| M0005 |           | 0.77064 |      |     |                      |                      |
| 9     | V\$YY1_01 | 2       | 8231 | (+) | NNNNNCCATNTWNNNWN    | TATTTTCAGTGATTGAC    |
| M0005 |           |         |      |     |                      |                      |
| 9     | V\$YY1_01 | 0.79751 | 8293 | (-) | NNNNNCCATNTWNNNWN    | ATGCAAACTGTATATA     |
| M0005 |           | 0.91644 |      |     |                      |                      |
| 9     | V\$YY1_01 | 8       | 8303 | (-) | NNNNNCCATNTWNNNWN    | GTATATATATGGTGTTG    |
| M0005 |           | 0.86271 |      |     |                      |                      |
| 9     | V\$YY1_01 | 3       | 8368 | (+) | NNNNNCCATNTWNNNWN    | TGTAATCATTTATAGAA    |
| M0005 |           | 0.79849 |      |     |                      |                      |
| 9     | V\$YY1_01 | 3       | 8548 | (+) | NNNNNCCATNTWNNNWN    | ACAGTCCAGATATGGGA    |
| M0005 |           | 0.83813 |      |     |                      |                      |
| 9     | V\$YY1_01 | 9       | 8551 | (-) | NNNNNCCATNTWNNNWN    | GTCCAGATATGGGACTT    |
| M0005 |           | 0.79259 |      |     |                      |                      |
| 9     | V\$YY1_01 | 5       | 8563 | (-) | NNNNNCCATNTWNNNWN    | GACTTAAAGGGGAATA     |
| M0005 |           | 0.78604 |      |     |                      |                      |
| 9     | V\$YY1_01 | 2       | 8575 | (+) | NNNNNCCATNTWNNNWN    | GAATAGCATATAGTTTT    |
| M0005 |           | 0.82699 |      |     |                      |                      |
| 9     | V\$YY1_01 | 9       | 8708 | (-) | NNNNNCCATNTWNNNWN    | GGCACAGCATGGTGTTT    |
| M0005 |           | 0.78833 |      |     |                      |                      |
| 9     | V\$YY1_01 | 6       | 8756 | (-) | NNNNNCCATNTWNNNWN    | CACCAAAATTGGAAATG    |
| M0005 |           | 0.84469 |      |     |                      |                      |
| 9     | V\$YY1_01 | 2       | 8762 | (-) | NNNNNCCATNTWNNNWN    | AATTGGAAATGGGGTGA    |
| M0005 |           | 0.77686 |      |     |                      |                      |
| 9     | V\$YY1_01 | 8       | 8804 | (+) | NNNNNCCATNTWNNNWN    | AATGTACATTTGTCTC     |
| M0005 |           | 0.88597 |      |     |                      |                      |
| 9     | V\$YY1_01 | 6       | 8843 | (-) | NNNNNCCATNTWNNNWN    | CTGGAAATATGGCAACT    |
| M0005 |           | 0.82667 |      |     |                      |                      |
| 9     | V\$YY1_01 | 1       | 8890 | (-) | NNNNNCCATNTWNNNWN    | ATTTTTAAATGAGTATA    |
| M0006 |           | 0.75544 |      |     |                      |                      |
| 9     | V\$YY1_02 | 4       | 8898 | (-) | NNNCGGCCATCTTGNCTSNW | ATGAGTATACATGGAACAAA |
| M0005 |           | 0.80275 |      |     |                      |                      |
| 9     | V\$YY1_01 | 2       | 8900 | (-) | NNNNNCCATNTWNNNWN    | GAGTATACATGGAACAA    |
| M0005 |           | 0.83912 |      |     |                      |                      |
| 9     | V\$YY1_01 | 2       | 8912 | (-) | NNNNNCCATNTWNNNWN    | AACAAAAAATGAAACTT    |
| M0005 |           | 0.79030 |      |     |                      |                      |
| 9     | V\$YY1_01 | 1       | 8978 | (+) | NNNNNCCATNTWNNNWN    | ATAAACCATATACTTTC    |
| M0005 |           | 0.84829 |      |     |                      |                      |
| 9     | V\$YY1_01 | 6       | 8990 | (-) | NNNNNCCATNTWNNNWN    | CTTTCAAAATGTTAATT    |
| M0005 |           | 0.78276 |      |     |                      |                      |
| 9     | V\$YY1_01 | 5       | 9020 | (+) | NNNNNCCATNTWNNNWN    | AAAGTTCAGTTTTAACT    |
| M0005 |           | 0.79226 |      |     |                      |                      |
| 9     | V\$YY1_01 | 7       | 9046 | (+) | NNNNNCCATNTWNNNWN    | CATGAACATATCAAAAT    |

|                        |             |         |      |     |                   |                   |
|------------------------|-------------|---------|------|-----|-------------------|-------------------|
| M0005                  |             |         |      |     |                   |                   |
| 9                      | V\$YY1_01   | 0.79325 | 9055 | (-) | NNNNNCCATNTWNNNWN | ATCAAAATATGTATAAA |
| CSN3 <i>Ovis Aries</i> |             |         |      |     |                   |                   |
|                        |             | 0.84895 |      |     |                   |                   |
| M00216                 | V\$TATA_C   | 7       | 71   | (+) | NCTATAAAAR        | ACATTAAAAAC       |
| M00252                 | V\$TATA_01  | 0.77493 | 71   | (+) | STATAAAWRNNNNNN   | ACATTAAAAATTCT    |
|                        |             | 0.77422 |      |     |                   |                   |
| M00216                 | V\$TATA_C   | 8       | 138  | (+) | NCTATAAAAR        | ATTTTAGAAG        |
|                        |             | 0.80221 |      |     |                   |                   |
| M00216                 | V\$TATA_C   | 8       | 216  | (+) | NCTATAAAAR        | TCTATCTAAA        |
|                        |             | 0.79297 |      |     |                   |                   |
| M00216                 | V\$TATA_C   | 6       | 234  | (+) | NCTATAAAAR        | TCTGTATAAT        |
|                        |             | 0.74069 |      |     |                   |                   |
| M00216                 | V\$TATA_C   | 2       | 326  | (+) | NCTATAAAAR        | TTCTTTAAAA        |
|                        |             | 0.96303 |      |     |                   |                   |
| M00216                 | V\$TATA_C   | 1       | 327  | (+) | NCTATAAAAR        | TCTTTAAAAA        |
|                        |             | 0.76762 |      |     |                   |                   |
| M00216                 | V\$TATA_C   | 6       | 328  | (+) | NCTATAAAAR        | CTTTAAAAAA        |
|                        |             | 0.85054 |      |     |                   |                   |
| M00252                 | V\$TATA_01  | 6       | 328  | (+) | STATAAAWRNNNNNN   | CTTTAAAAAAAAAAAA  |
|                        |             | 0.79376 |      |     |                   |                   |
| M00216                 | V\$TATA_C   | 8       | 329  | (+) | NCTATAAAAR        | TTTAAAAAAA        |
|                        |             | 0.77975 |      |     |                   |                   |
| M00252                 | V\$TATA_01  | 1       | 375  | (+) | STATAAAWRNNNNNN   | AGACAAATGTGGAGG   |
|                        |             | 0.77315 |      |     |                   |                   |
| M00252                 | V\$TATA_01  | 4       | 395  | (+) | STATAAAWRNNNNNN   | CTTTTAGGAAGATG    |
|                        |             | 0.78368 |      |     |                   |                   |
| M00127                 | V\$GATA1_03 | 4       | 43   | (+) | RNSNNGATAANNGN    | GAGCTGACAGTCAC    |
|                        |             | 0.77640 |      |     |                   |                   |
| M00075                 | V\$GATA1_01 | 7       | 45   | (+) | SNNGATNNNN        | GCTGACAGTC        |
|                        |             | 0.81014 |      |     |                   |                   |
| M00127                 | V\$GATA1_03 | 2       | 59   | (+) | RNSNNGATAANNGN    | GGAAAGGTAATCAC    |
|                        |             | 0.81194 |      |     |                   |                   |
| M00075                 | V\$GATA1_01 | 5       | 64   | (-) | SNNGATNNNN        | GGTAATCACA        |
|                        |             | 0.82724 |      |     |                   |                   |
| M00076                 | V\$GATA2_01 | 4       | 64   | (-) | NNNGATRNNN        | GGTAATCACA        |
|                        |             | 0.78331 |      |     |                   |                   |
| M00075                 | V\$GATA1_01 | 7       | 108  | (+) | SNNGATNNNN        | GCAGTTTGTG        |
|                        |             | 0.81161 |      |     |                   |                   |
| M00127                 | V\$GATA1_03 | 2       | 148  | (-) | RNSNNGATAANNGN    | AACATTTTCTCCT     |
|                        |             | 0.79170 |      |     |                   |                   |
| M00075                 | V\$GATA1_01 | 8       | 184  | (-) | SNNGATNNNN        | GAATATCCTT        |
|                        |             | 0.87280 |      |     |                   |                   |
| M00076                 | V\$GATA2_01 | 1       | 184  | (-) | NNNGATRNNN        | GAATATCCTT        |
|                        |             | 0.83038 |      |     |                   |                   |
| M00203                 | V\$GATA_C   | 2       | 188  | (-) | NGATAAGNMNN       | ATCCTTTGTCA       |
|                        |             | 0.81234 |      |     |                   |                   |
| M00127                 | V\$GATA1_03 | 7       | 189  | (-) | RNSNNGATAANNGN    | TCCTTTGTCATCAT    |
|                        |             | 0.79103 |      |     |                   |                   |
| M00127                 | V\$GATA1_03 | 4       | 192  | (-) | RNSNNGATAANNGN    | TTTGTCATCATTAT    |
|                        |             | 0.77788 |      |     |                   |                   |
| M00075                 | V\$GATA1_01 | 7       | 194  | (-) | SNNGATNNNN        | TGTCATCATT        |
|                        |             | 0.79657 |      |     |                   |                   |
| M00076                 | V\$GATA2_01 | 2       | 194  | (-) | NNNGATRNNN        | TGTCATCATT        |
|                        |             | 0.80312 |      |     |                   |                   |
| M00126                 | V\$GATA1_02 | 5       | 201  | (+) | NNNNNGATANKGNN    | ATTATGATATTAGT    |
|                        |             |         |      |     |                   |                   |
| M00128                 | V\$GATA1_04 | 0.83701 | 202  | (+) | NNCWGATARNNNN     | TTATGATATTAGT     |
|                        |             | 0.80454 |      |     |                   |                   |
| M00075                 | V\$GATA1_01 | 1       | 203  | (+) | SNNGATNNNN        | TATGATATTA        |
|                        |             | 0.85340 |      |     |                   |                   |
| M00076                 | V\$GATA2_01 | 6       | 203  | (+) | NNNGATRNNN        | TATGATATTA        |
|                        |             | 0.84315 |      |     |                   |                   |
| M00077                 | V\$GATA3_01 | 5       | 204  | (+) | NNGATARNG         | ATGATATTA         |

|        |             |                    |     |     |                 |                |
|--------|-------------|--------------------|-----|-----|-----------------|----------------|
| M00203 | V\$GATA_C   | 0.91923<br>0.81687 | 212 | (-) | NGATAAGNMNN     | AGTTTCTATCT    |
| M00126 | V\$GATA1_02 | 5<br>0.87193       | 213 | (-) | NNNNNGATANKGNN  | GTTTCTATCTAAAC |
| M00128 | V\$GATA1_04 | 6<br>0.88258       | 213 | (-) | NNCWGATARNNNN   | GTTTCTATCTAAA  |
| M00077 | V\$GATA3_01 | 8<br>0.79220       | 215 | (-) | NNGATARNG       | TTCTATCTA      |
| M00075 | V\$GATA1_01 | 1<br>0.82454       | 228 | (+) | SNNGATNNNN      | TTAGATTCTG     |
| M00077 | V\$GATA3_01 | 6<br>0.78515       | 229 | (+) | NNGATARNG       | TAGATTCTG      |
| M00127 | V\$GATA1_03 | 4<br>0.83316       | 259 | (-) | RNSNNGATAANNNGN | ATTTTAACTTCAC  |
| M00075 | V\$GATA1_01 | 9<br>0.81551       | 286 | (+) | SNNGATNNNN      | CAAGATTTGA     |
| M00076 | V\$GATA2_01 | 6<br>0.85378       | 286 | (+) | NNNGATRNNN      | CAAGATTTGA     |
| M00077 | V\$GATA3_01 | 8<br>0.82062       | 287 | (+) | NNGATARNG       | AAGATTTGA      |
| M00126 | V\$GATA1_02 | 5<br>0.82527       | 289 | (+) | NNNNNGATANKGNN  | GATTTGATACTTGC |
| M00075 | V\$GATA1_01 | 1                  | 291 | (+) | SNNGATNNNN      | TTTGATACTT     |
| M00076 | V\$GATA2_01 | 0.81281<br>0.77156 | 291 | (+) | NNNGATRNNN      | TTTGATACTT     |
| M00126 | V\$GATA1_02 | 3<br>0.83711       | 310 | (+) | NNNNNGATANKGNN  | TTGAAGAAAATGTA |
| M00075 | V\$GATA1_01 | 7<br>0.81235       | 321 | (+) | SNNGATNNNN      | GTAGATTCTT     |
| M00076 | V\$GATA2_01 | 9<br>0.79341       | 343 | (-) | NNNGATRNNN      | AAGTATGTTC     |
| M00076 | V\$GATA2_01 | 5<br>0.83194       | 352 | (+) | NNNGATRNNN      | CAAGACAGTG     |
| M00127 | V\$GATA1_03 | 5                  | 401 | (+) | RNSNNGATAANNNGN | AGGAAGATGAAAGT |
| M00075 | V\$GATA1_01 | 0.78233            | 403 | (+) | SNNGATNNNN      | GAAGATGAAA     |
| M00076 | V\$GATA2_01 | 0.79567<br>0.82498 | 403 | (+) | NNNGATRNNN      | GAAGATGAAA     |
| M00077 | V\$GATA3_01 | 9<br>0.80531       | 404 | (+) | NNGATARNG       | AAGATGAAA      |
| M00126 | V\$GATA1_02 | 3<br>0.84254       | 414 | (+) | NNNNNGATANKGNN  | TACAGGATAATCCA |
| M00075 | V\$GATA1_01 | 7<br>0.89941       | 416 | (+) | SNNGATNNNN      | CAGGATAATC     |
| M00076 | V\$GATA2_01 | 4<br>0.82144       | 416 | (+) | NNNGATRNNN      | CAGGATAATC     |
| M00077 | V\$GATA3_01 | 4<br>0.84529       | 417 | (+) | NNGATARNG       | AGGATAATC      |
| M00203 | V\$GATA_C   | 4<br>0.78282       | 418 | (+) | NGATAAGNMNN     | GGATAATCCAG    |
| M00075 | V\$GATA1_01 | 3<br>0.88450       | 419 | (-) | SNNGATNNNN      | GATAATCCAG     |
| M00075 | V\$GATA1_01 | 1<br>0.84348       | 425 | (+) | SNNGATNNNN      | CCAGATTGAT     |
| M00076 | V\$GATA2_01 | 2<br>0.83562       | 425 | (+) | NNNGATRNNN      | CCAGATTGAT     |
| M00077 | V\$GATA3_01 | 3<br>0.79581       | 426 | (+) | NNGATARNG       | CAGATTGAT      |
| M00223 | V\$STAT_01  | 5<br>0.82556       | 82  | (-) | TTCCCRKAA       | TTCTAAGAG      |
| M00223 | V\$STAT_01  | 1<br>0.88858       | 102 | (+) | TTCCCRKAA       | TTCACGGCA      |
| M00223 | V\$STAT_01  | 1                  | 141 | (-) | TTCCCRKAA       | TTAGAAGAA      |

|        |            |                    |     |                    |                      |                           |
|--------|------------|--------------------|-----|--------------------|----------------------|---------------------------|
| M00223 | V\$STAT_01 | 0.85354<br>2       | 397 | (-)                | TTCCCRKAA            | TTTTAGGAA                 |
| M00137 | V\$OCT1_03 | 0.90991<br>7       | 62  | (+)                | NNNRTAATNANNN        | AAGGTAATCACAT             |
| M00137 | V\$OCT1_03 | 0.84749<br>1       | 68  | (-)                | NNNRTAATNANNN        | ATCACATTAAC               |
| M00162 | V\$OCT1_06 | 0.84218<br>7       | 70  | (-)                | CWNAWTKWSATRYN       | CACATTAACATT              |
| M00136 | V\$OCT1_02 | 0.80157<br>0.77693 | 85  | (-)                | NNGAATATKCANNNN      | TAAGAGAATAATTCT           |
| M00136 | V\$OCT1_02 | 0.79923<br>6       | 112 | (-)                | NNGAATATKCANNNN      | TTTGTGCTTATTACA           |
| M00248 | V\$OCT1_07 | 0.89095<br>7       | 112 | (+)                | TNTATGNTAATT         | TTTGTGCTTATT              |
| M00137 | V\$OCT1_03 | 0.92176<br>2       | 116 | (-)                | NNNRTAATNANNN        | TGCTTATTACACC             |
| M00136 | V\$OCT1_02 | 0.80427<br>5       | 179 | (-)                | NNGAATATKCANNNN      | AGCTTGAATATCCTT           |
| M00136 | V\$OCT1_02 | 0.80427<br>7       | 182 | (+)                | NNGAATATKCANNNN      | TTGAATATCCTTTGT           |
| M00137 | V\$OCT1_03 | 0.95891<br>0.87580 | 196 | (-)                | NNNRTAATNANNN        | TCATCATTATGAT             |
| M00161 | V\$OCT1_05 | 0.84492<br>9       | 198 | (+)                | MKNATTTGCATAYY       | ATCATTATGATATT            |
| M00162 | V\$OCT1_06 | 0.91914<br>2       | 198 | (+)                | CWNAWTKWSATRYN       | ATCATTATGATATT            |
| M00162 | V\$OCT1_06 | 0.88164<br>1       | 223 | (+)                | CWNAWTKWSATRYN       | AAACATTAGATTCT            |
| M00162 | V\$OCT1_06 | 0.88779<br>1       | 224 | (-)                | CWNAWTKWSATRYN       | AACATTAGATTCTG            |
| M00137 | V\$OCT1_03 | 0.80429<br>1       | 236 | (+)                | NNNRTAATNANNN        | TGTATAATGTTAT             |
| M00162 | V\$OCT1_06 | 0.89414<br>7       | 252 | (+)                | CWNAWTKWSATRYN       | CAAATTTATTTTAA            |
| M00162 | V\$OCT1_06 | 0.83145<br>1       | 286 | (+)                | CWNAWTKWSATRYN       | CAAGATTTGATACT            |
| M00138 | V\$OCT1_04 | 0.79805<br>1       | 311 | (+)                | NNNNNNNWATGCAAATNNNW | TGAAGAAAATGTAGAT-TCTTTAA  |
| M00136 | V\$OCT1_02 | 0.81768<br>1       | 313 | (+)                | NNGAATATKCANNNN      | AAGAAAATGTAGATT           |
| M00195 | V\$OCT1_Q6 | 0.84726<br>6       | 315 | (+)                | NNNNATGCAAATNAN      | GAAAATGTAGATTCT           |
| M00162 | V\$OCT1_06 | 0.83437<br>6       | 316 | (+)                | CWNAWTKWSATRYN       | AAAATGTAGATTCT            |
| M00162 | V\$OCT1_06 | 0.79308<br>5       | 316 | (-)                | CWNAWTKWSATRYN       | AAAATGTAGATTCT            |
| M00248 | V\$OCT1_07 | 0.79464<br>9       | 316 | (+)                | TNTATGNTAATT         | AAAATGTAGATT              |
| M00138 | V\$OCT1_04 | 0.85144<br>7       | 320 | (+)                | NNNNNNNWATGCAAATNNNW | TGTAGAT-TCTTTAAAAAAAAAAAA |
| M00137 | V\$OCT1_03 | 0.80078<br>2       | 393 | (-)                | NNNRTAATNANNN        | AACTTTTTAGGAA             |
| M00162 | V\$OCT1_06 | 0.80340<br>1       | 419 | (-)                | CWNAWTKWSATRYN       | GATAATCCAGATTG            |
| M00059 | V\$YY1_01  | 0.79226<br>8       | 144 | (+)                | NNNNNCCATNTWNNNNWN   | GAAGAACATTTTCTTCC         |
| M00059 | V\$YY1_01  | 0.77097<br>7       | 194 | (+)                | NNNNNCCATNTWNNNNWN   | TGTCATCATTATGATAT         |
| M00059 | V\$YY1_01  | 0.79161<br>311     | (-) | NNNNNCCATNTWNNNNWN | TGAAGAAAATGTAGATT    |                           |
| M00059 | V\$YY1_01  | 0.79161<br>2       | 399 | (-)                | NNNNNCCATNTWNNNNWN   | TTAGGAAGATGAAAGTA         |
